# Supplementary material for: Macrophage inflammation resolution requires CPEB4-directed offsetting of mRNA degradation
Source: PubMed Central journal article supplement (PMC9094754; doi:10.7554/elife.75873), 2022-04-20

Black Box. Figure 2B. CPEB4.

Red Boxes. Figure 2 - figure supplement 1. Pannel A. CPEB4. Replicates 1 and 2

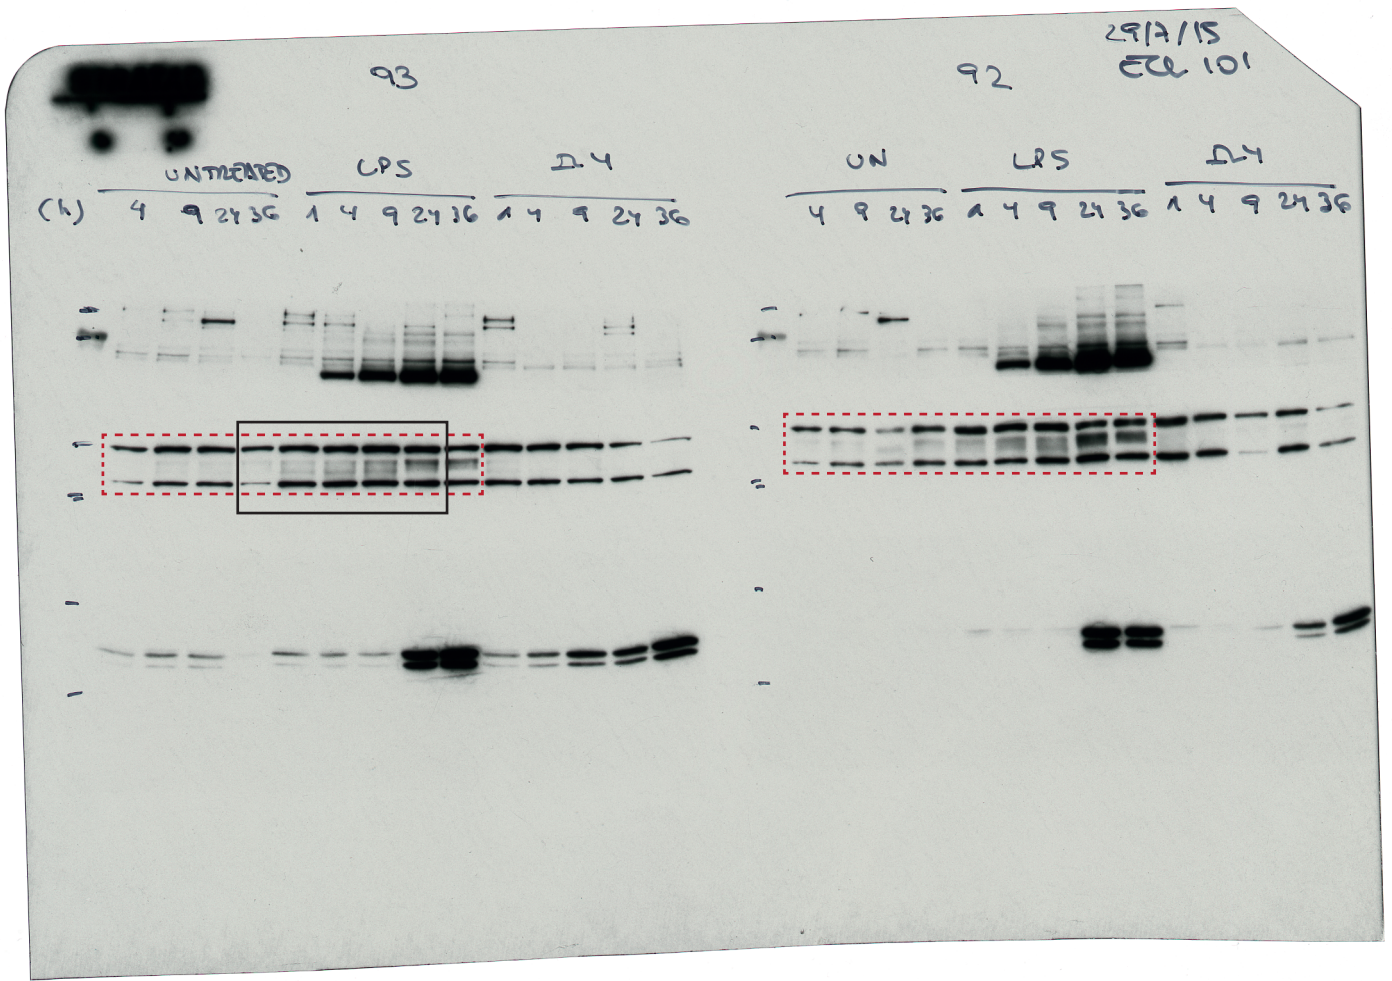

Black Box. Figure 2B. CPEB4.

Red Boxes. Figure 2 - figure supplement 1. Pannel A. Tubulin. Replicates 1 and 2

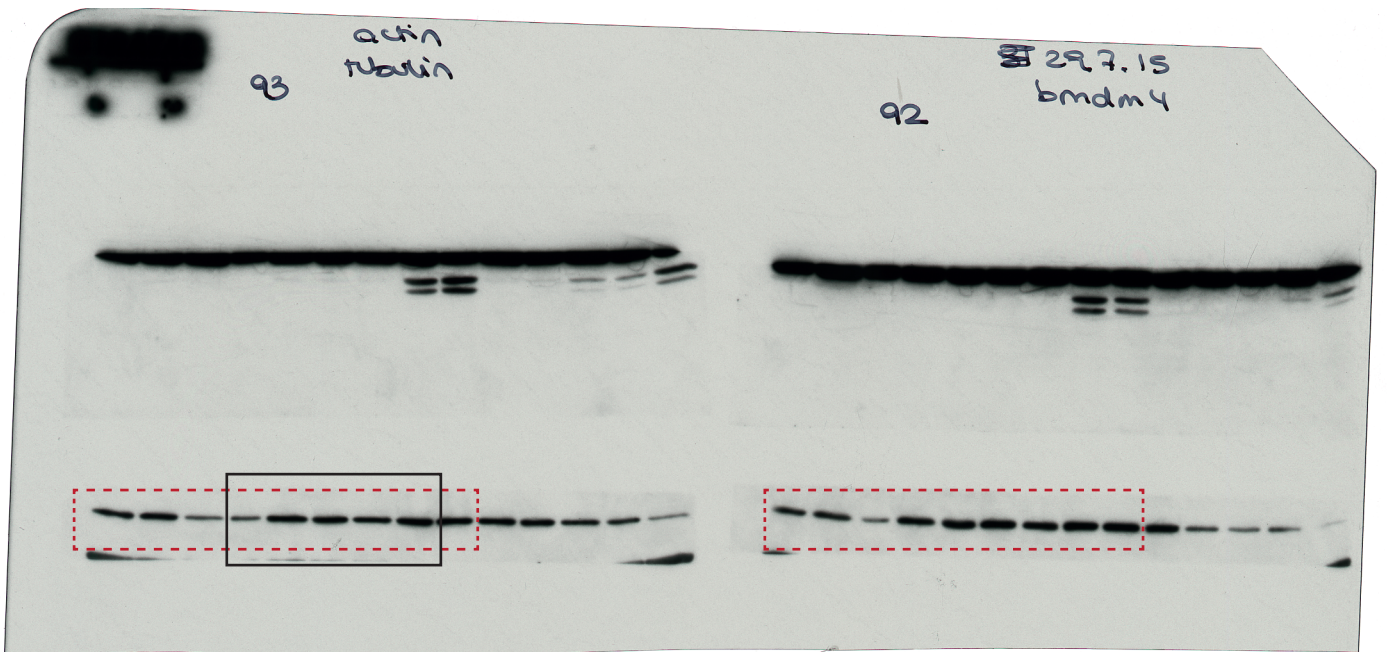



Figure 2 - figure supplement 1. Pannel A. CPEB4. Replicate 3

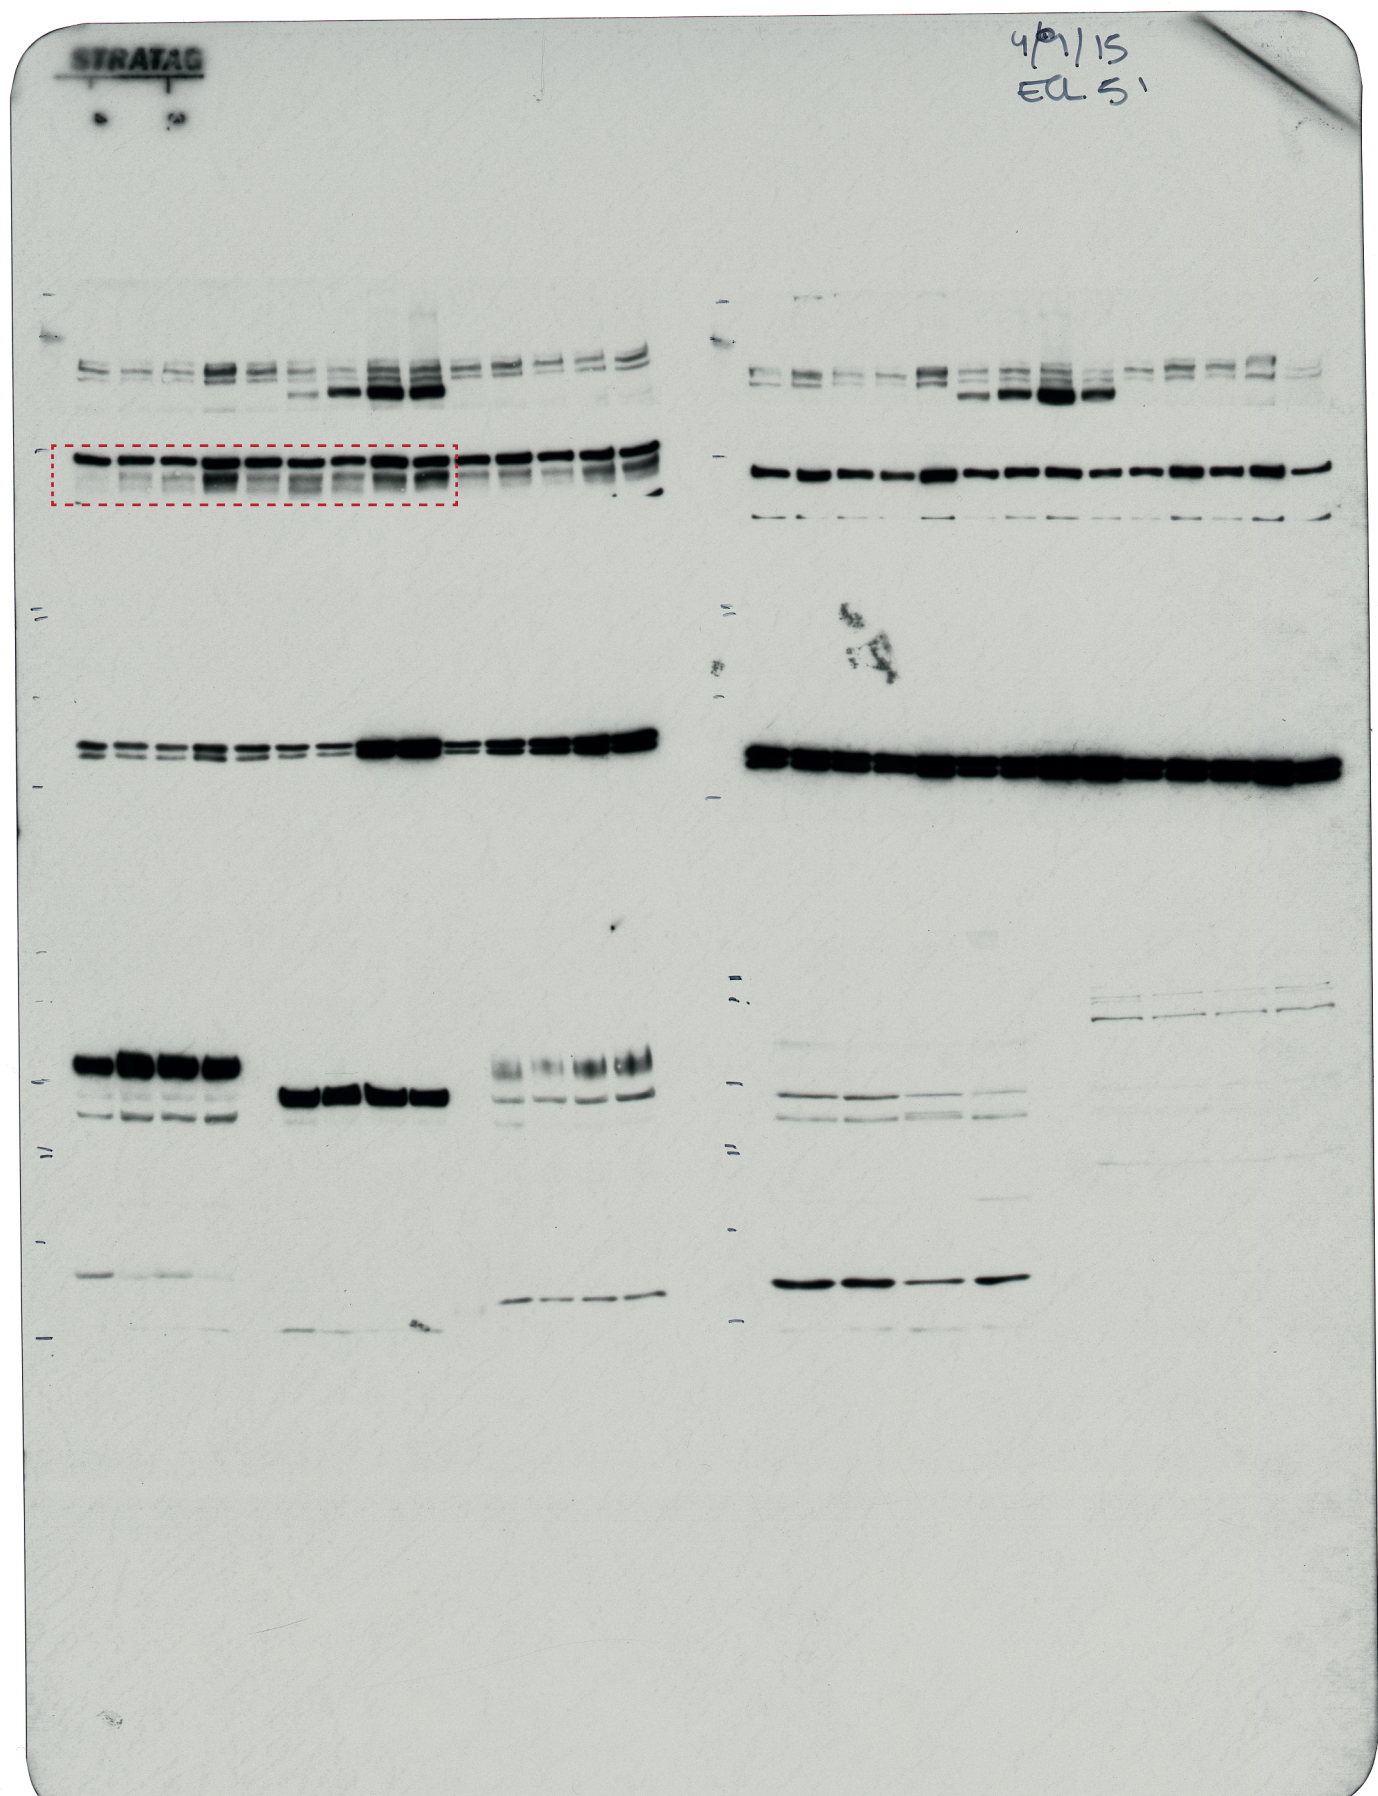



Figure 2 - figure supplement 1. Pannel A. Tubulin. Replicate 3

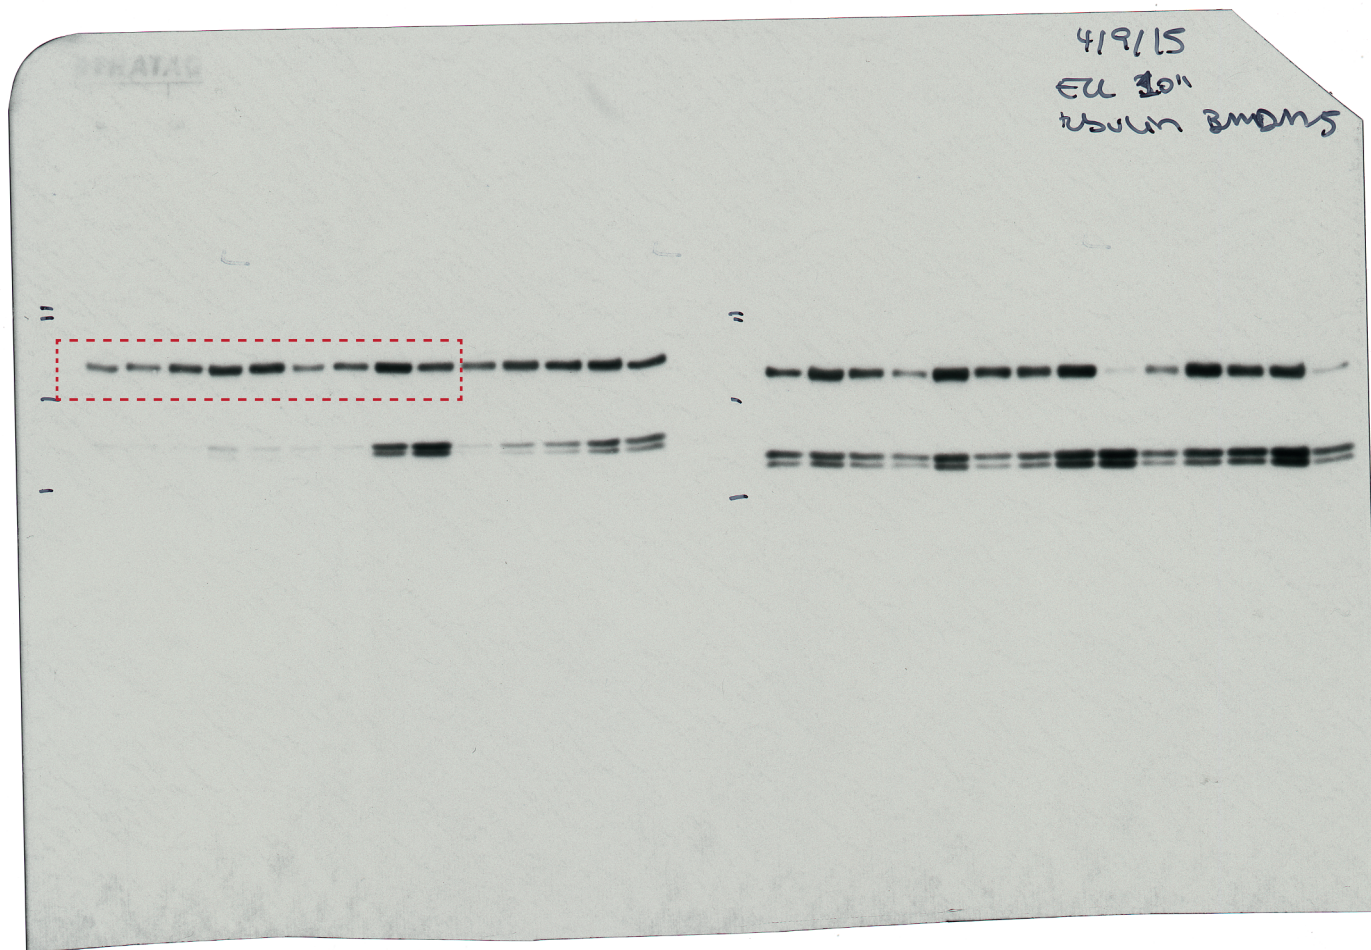

Supplement: elife-75873-fig2-data1.pdf [file elife-75873-fig2-data1.pdf]
