# Supplementary material for: Macrophage inflammation resolution requires CPEB4-directed offsetting of mRNA degradation
Source: PubMed Central journal article supplement (PMC9094754; doi:10.7554/elife.75873), 2022-04-20

Black Box. Figure 2F. HIF1a Replicate 1 (also shown in Figure 2 - figure supplement 3).  
 Red Box. Figure 2 - figure supplement 3. HIF1a. Replicate 2.

HIF 1  
 $\alpha$ p65 2  
 $\alpha$ PERK 3

(NOT SCANNED  
 YET)

24/1/18  
 EU 21

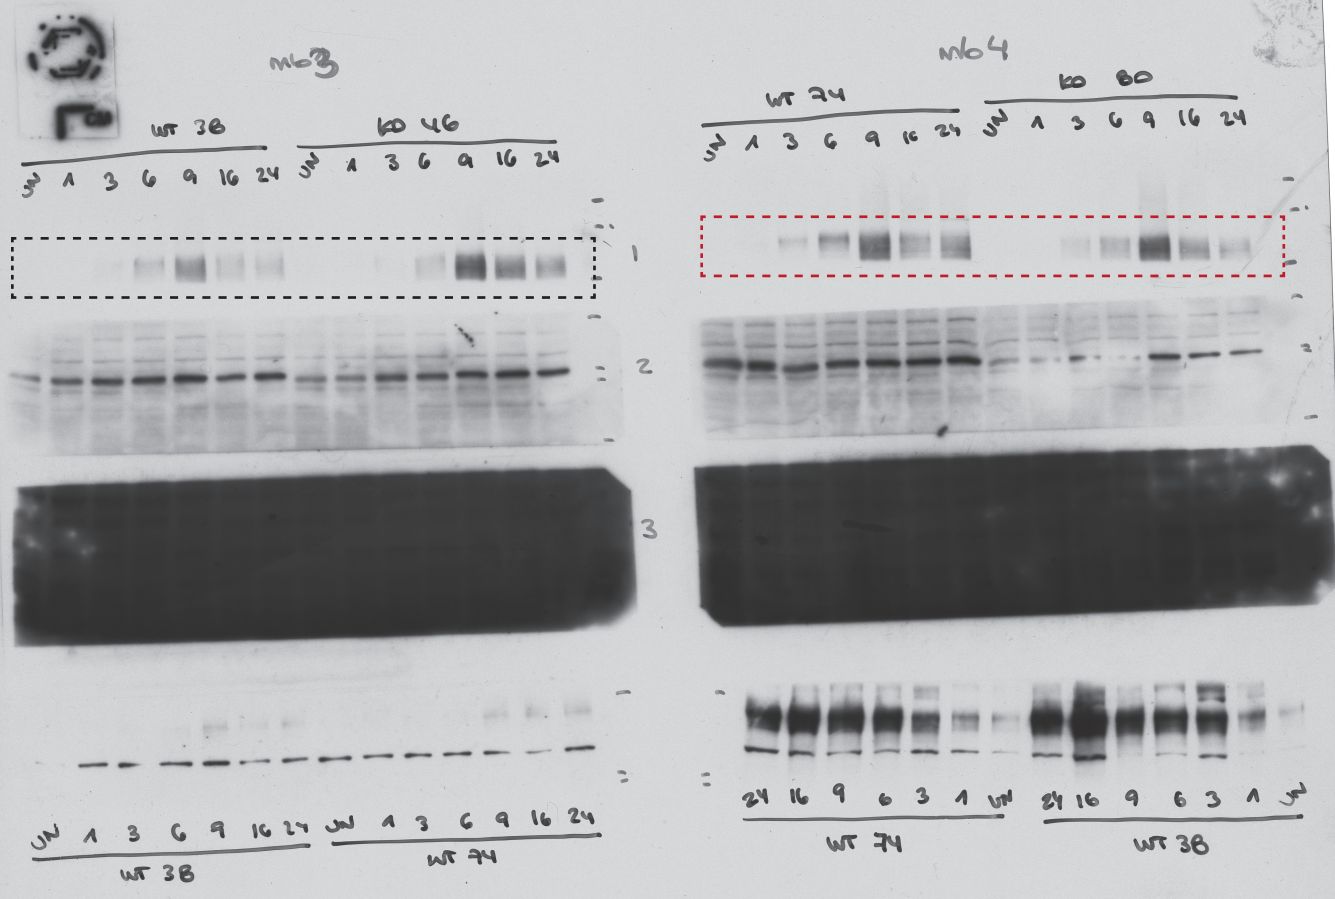

$\alpha$ cp65<sup>4</sup> supernatant  
 No 3

$\alpha$ cp65<sup>4</sup> pellet.  
 No 4

Black Box. Figure 2F. Vinculin Replicate 1 (also shown in Figure 2 - figure supplement 3).  
Red Box. Figure 2 - figure supplement 3. Vinculin. Replicate 2.

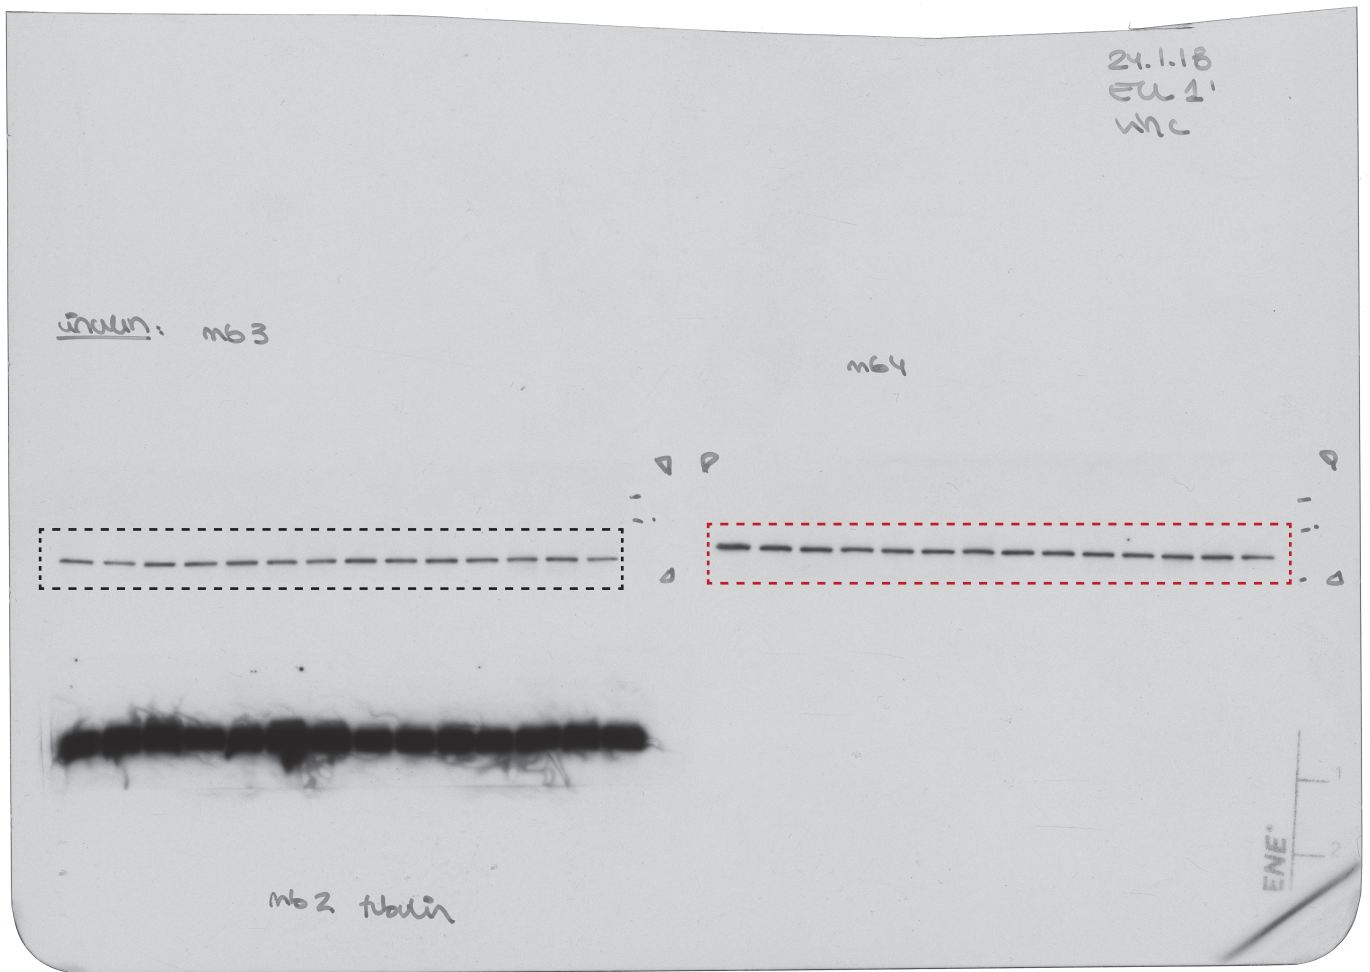





Black Box. Figure 2 - figure supplement 3. Vinculin. Replicate 3.

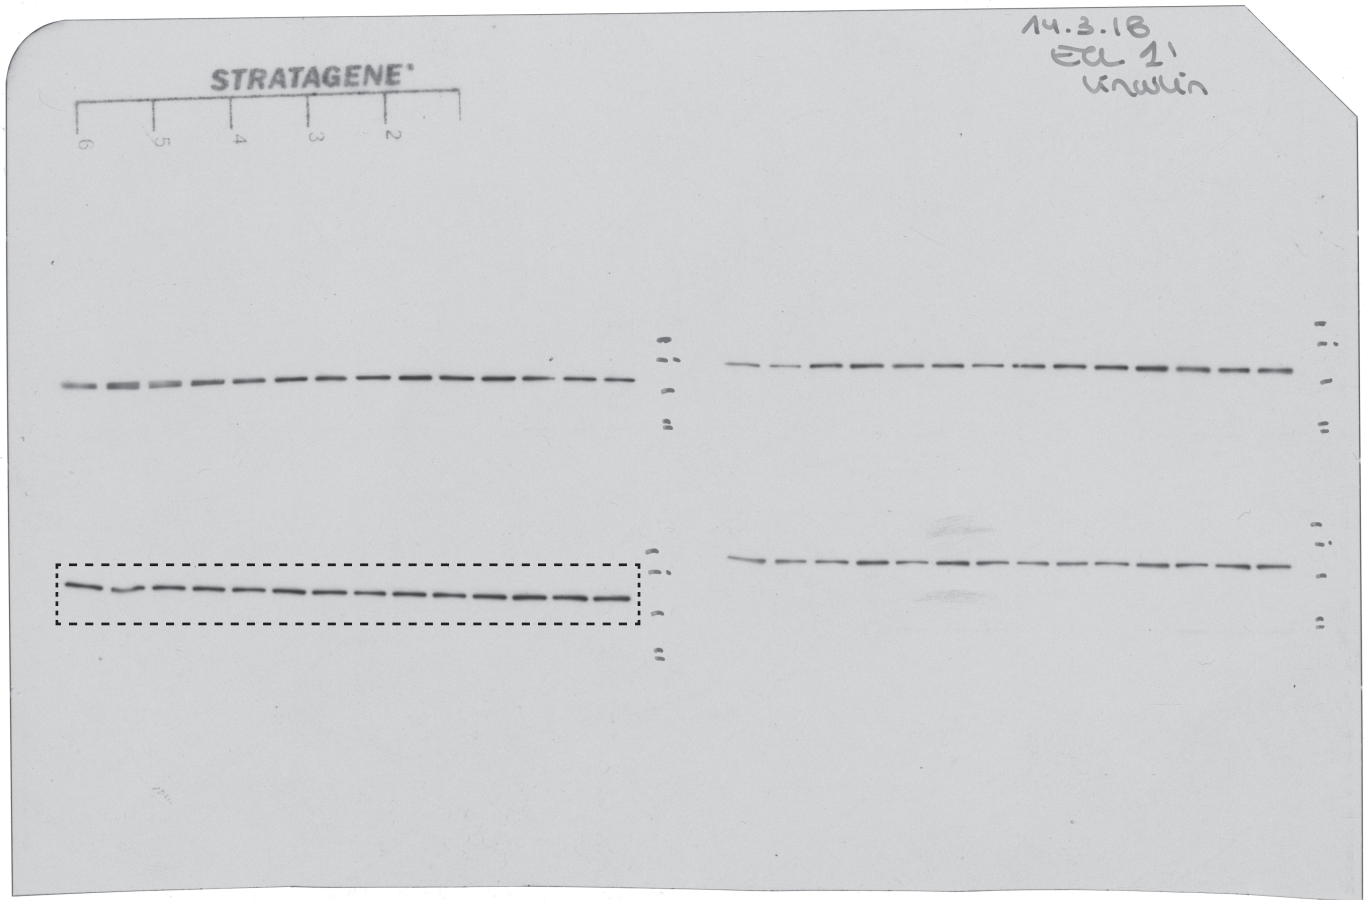

Supplement: elife-75873-fig2-data3.pdf [file elife-75873-fig2-data3.pdf]
