# Supplementary material for: Macrophage inflammation resolution requires CPEB4-directed offsetting of mRNA degradation
Source: PubMed Central journal article supplement (PMC9094754; doi:10.7554/elife.75873), 2022-04-20

Black Box. Figure 3E. TTP

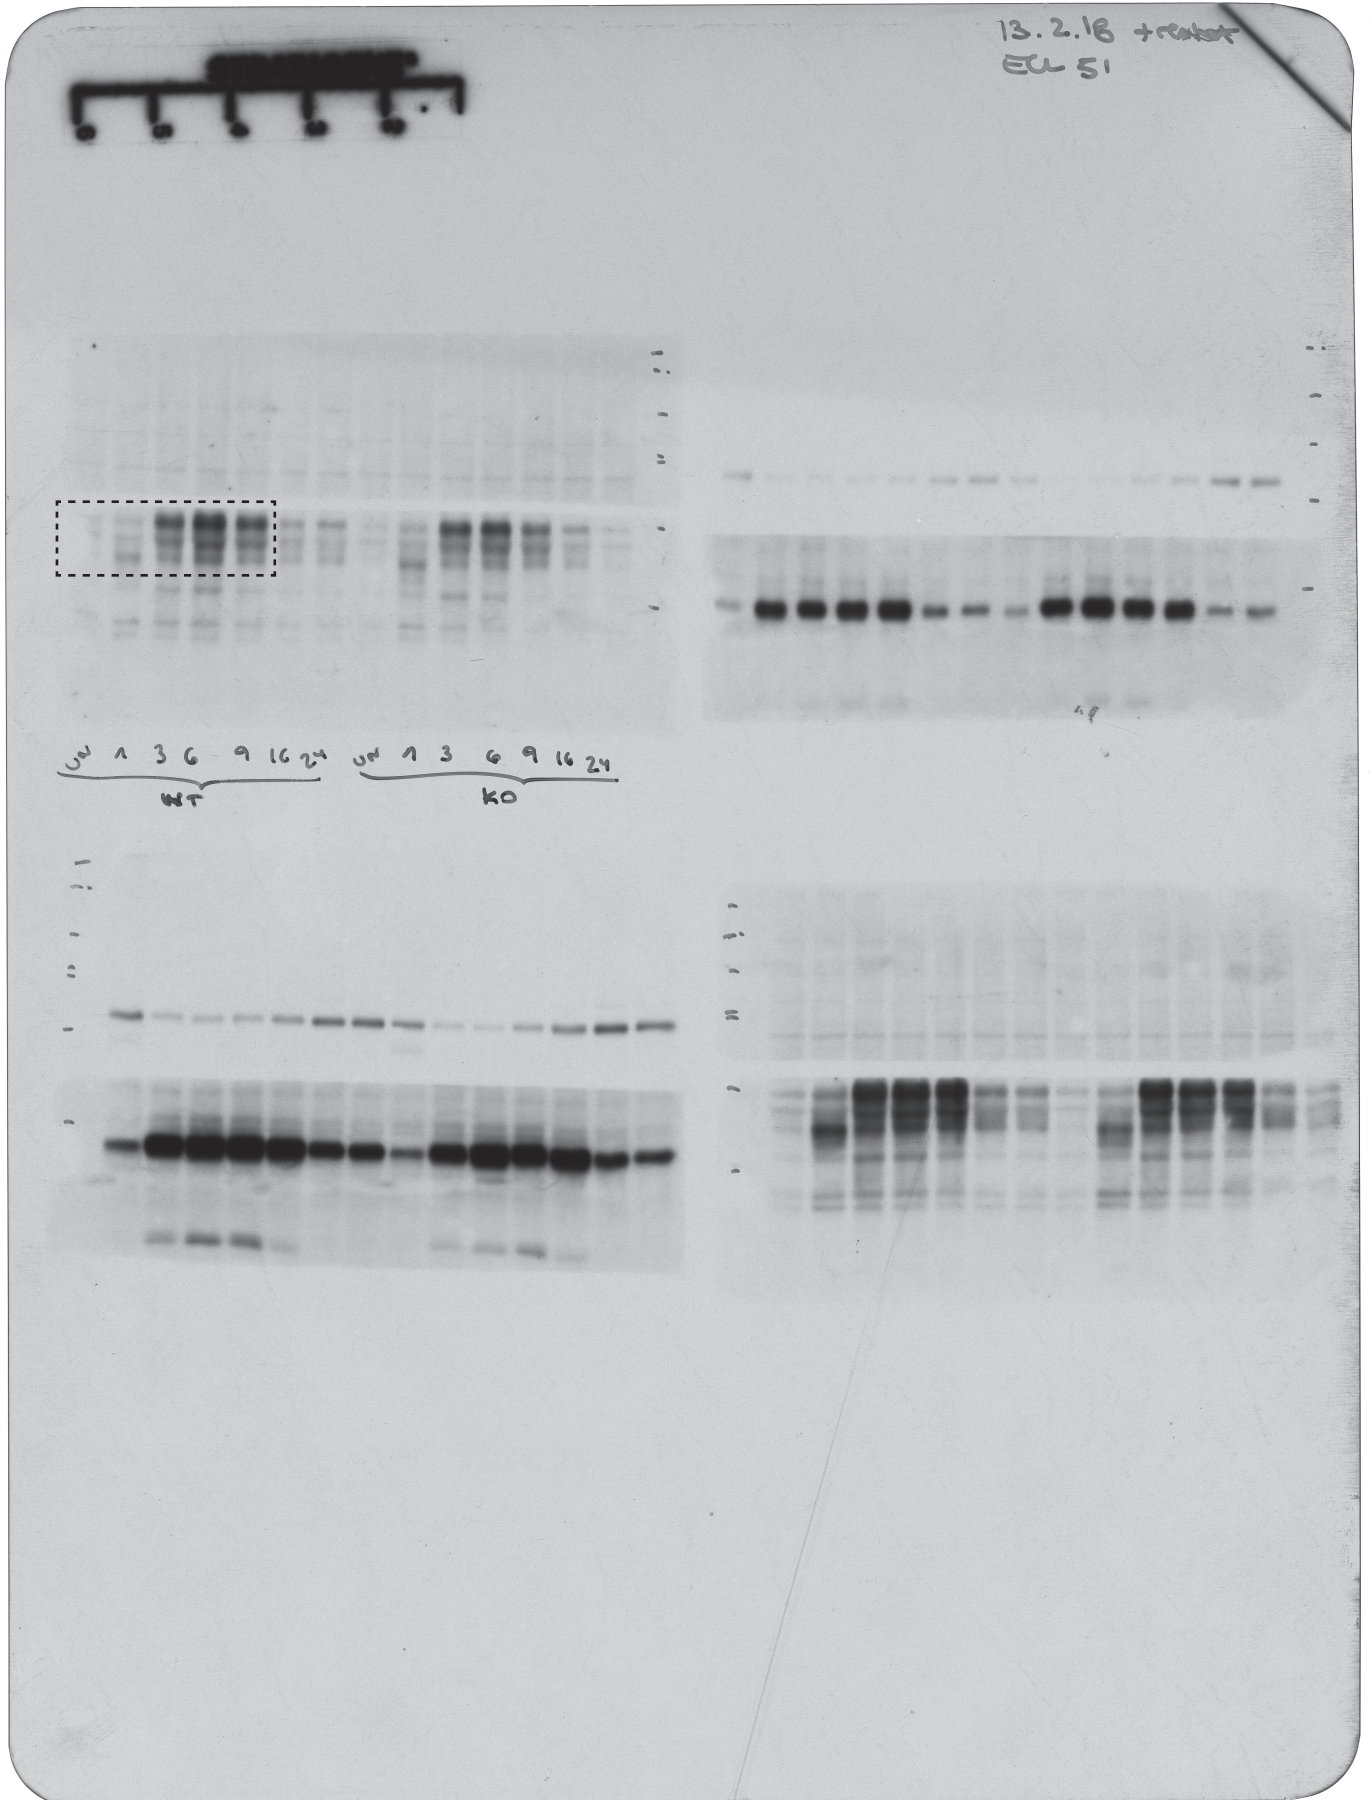

Black Box. Figure 3E. Vinculin

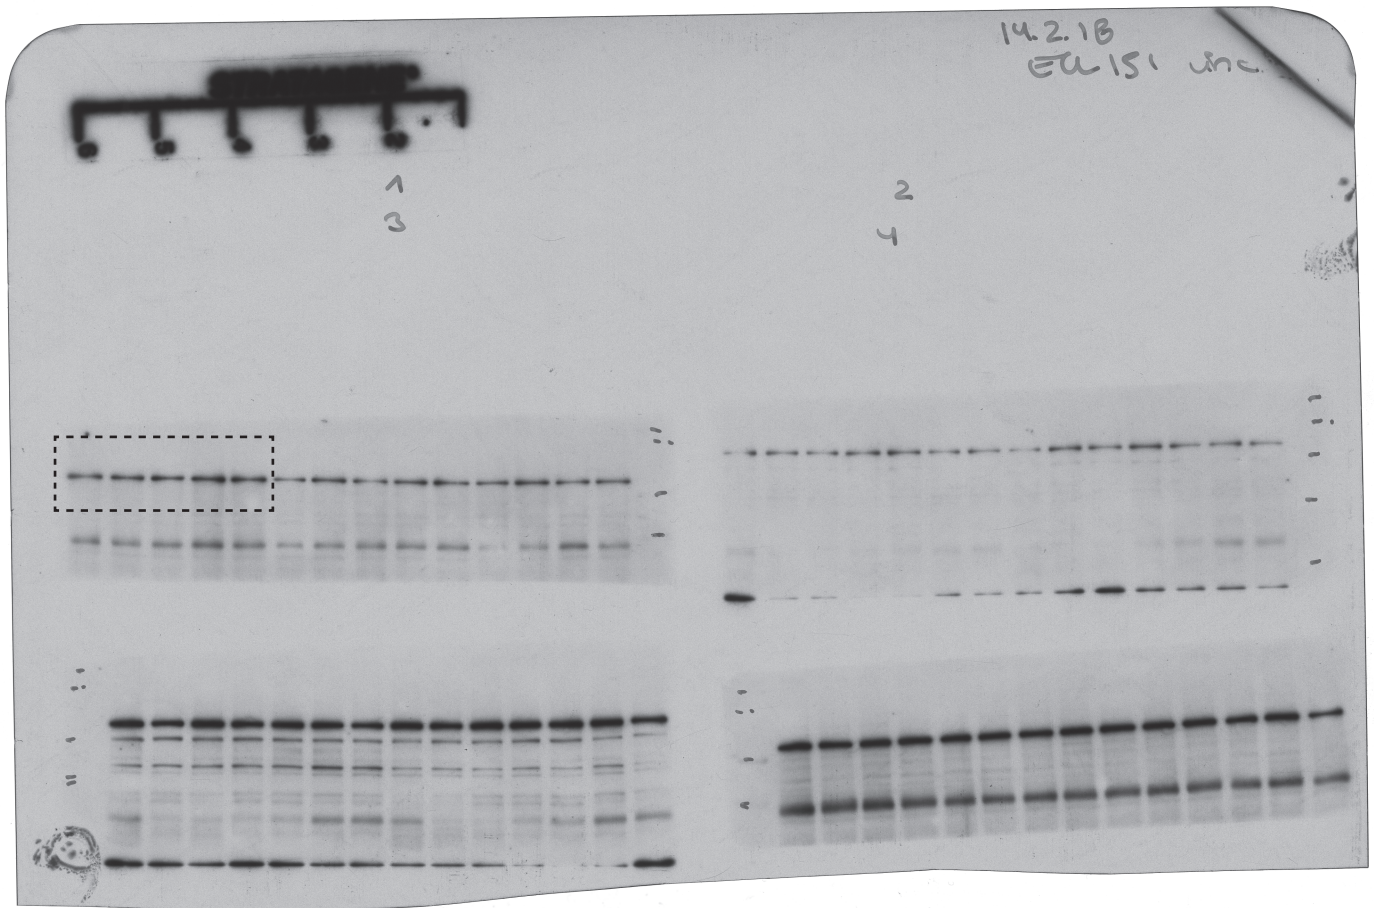

Supplement: elife-75873-fig3-data1.pdf [file elife-75873-fig3-data1.pdf]
