# Supplementary material for: Macrophage inflammation resolution requires CPEB4-directed offsetting of mRNA degradation
Source: PubMed Central journal article supplement (PMC9094754; doi:10.7554/elife.75873), 2022-04-20

Black Box. Figure 4G. SOCS1 Replicate 1

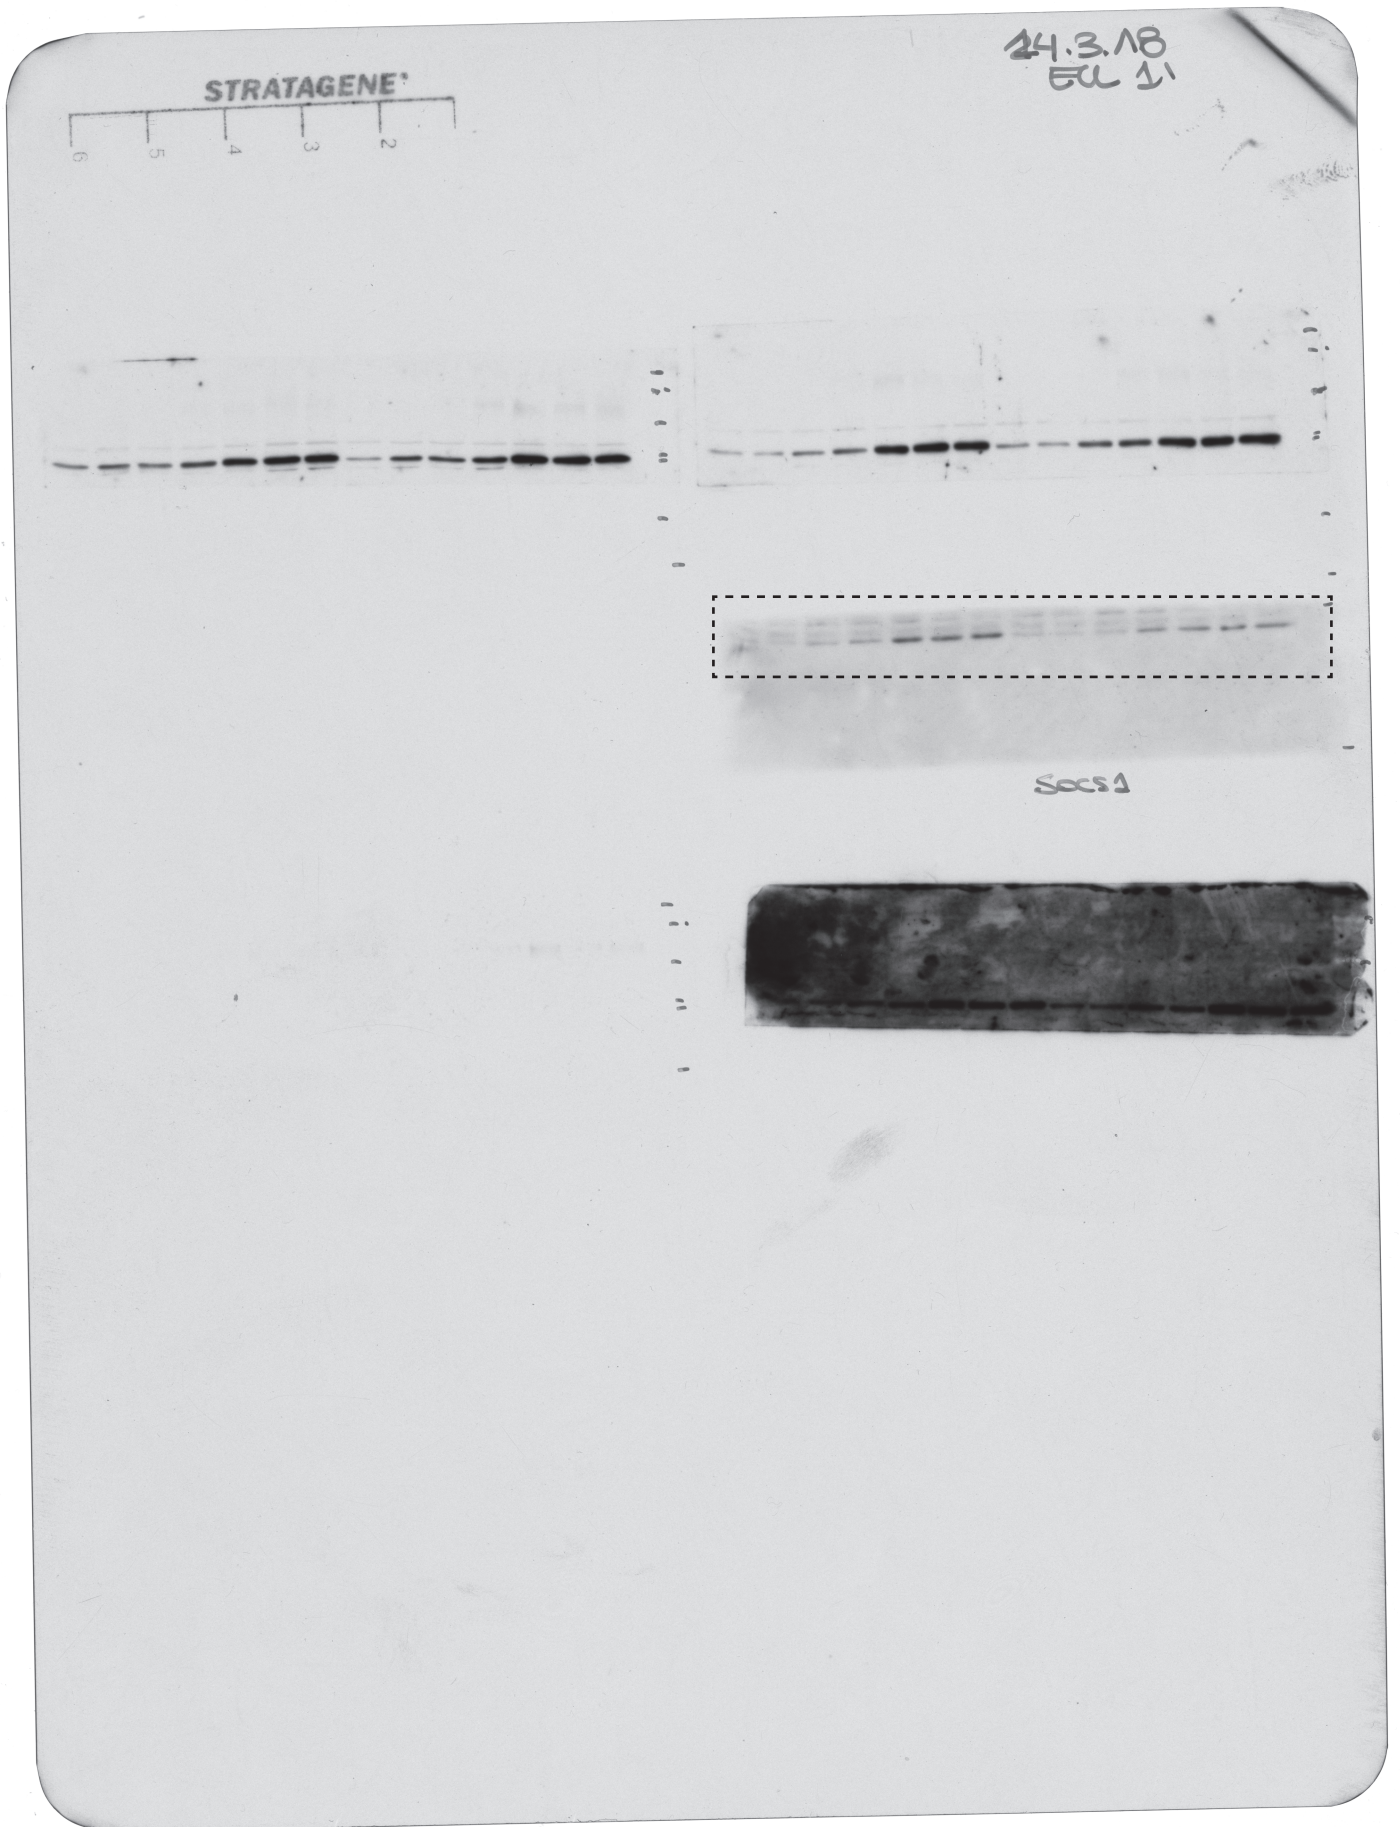





Red Box. Figure 4G. SOCS1 Replicate 2 (not shown in figure, but used for quantification)

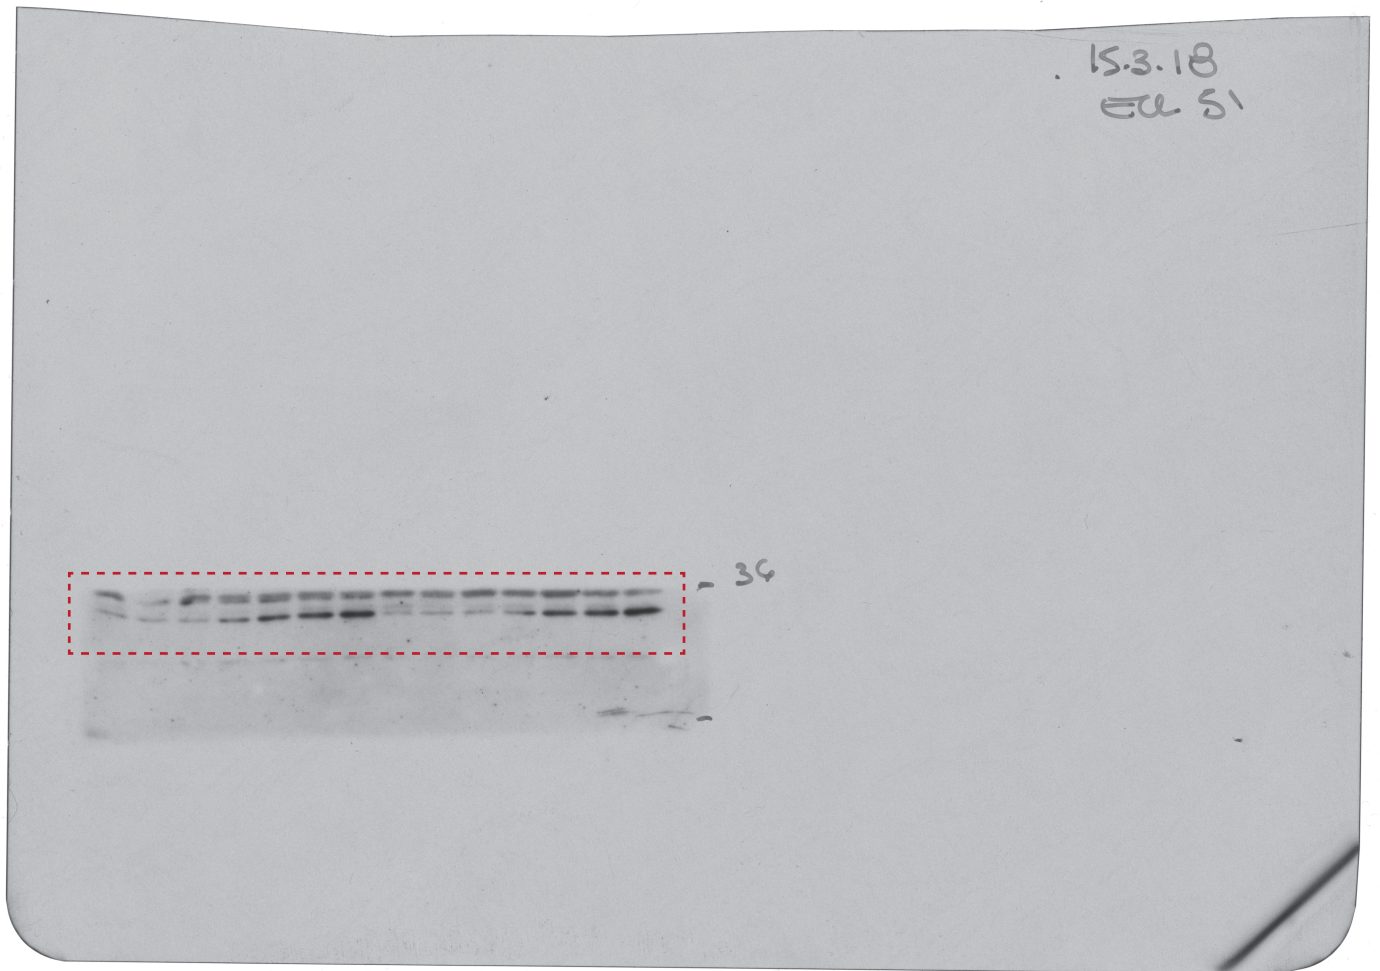

Blue Box. Figure 4G. SOCS1 Replicate 3 (not shown in figure, but used for quantification)

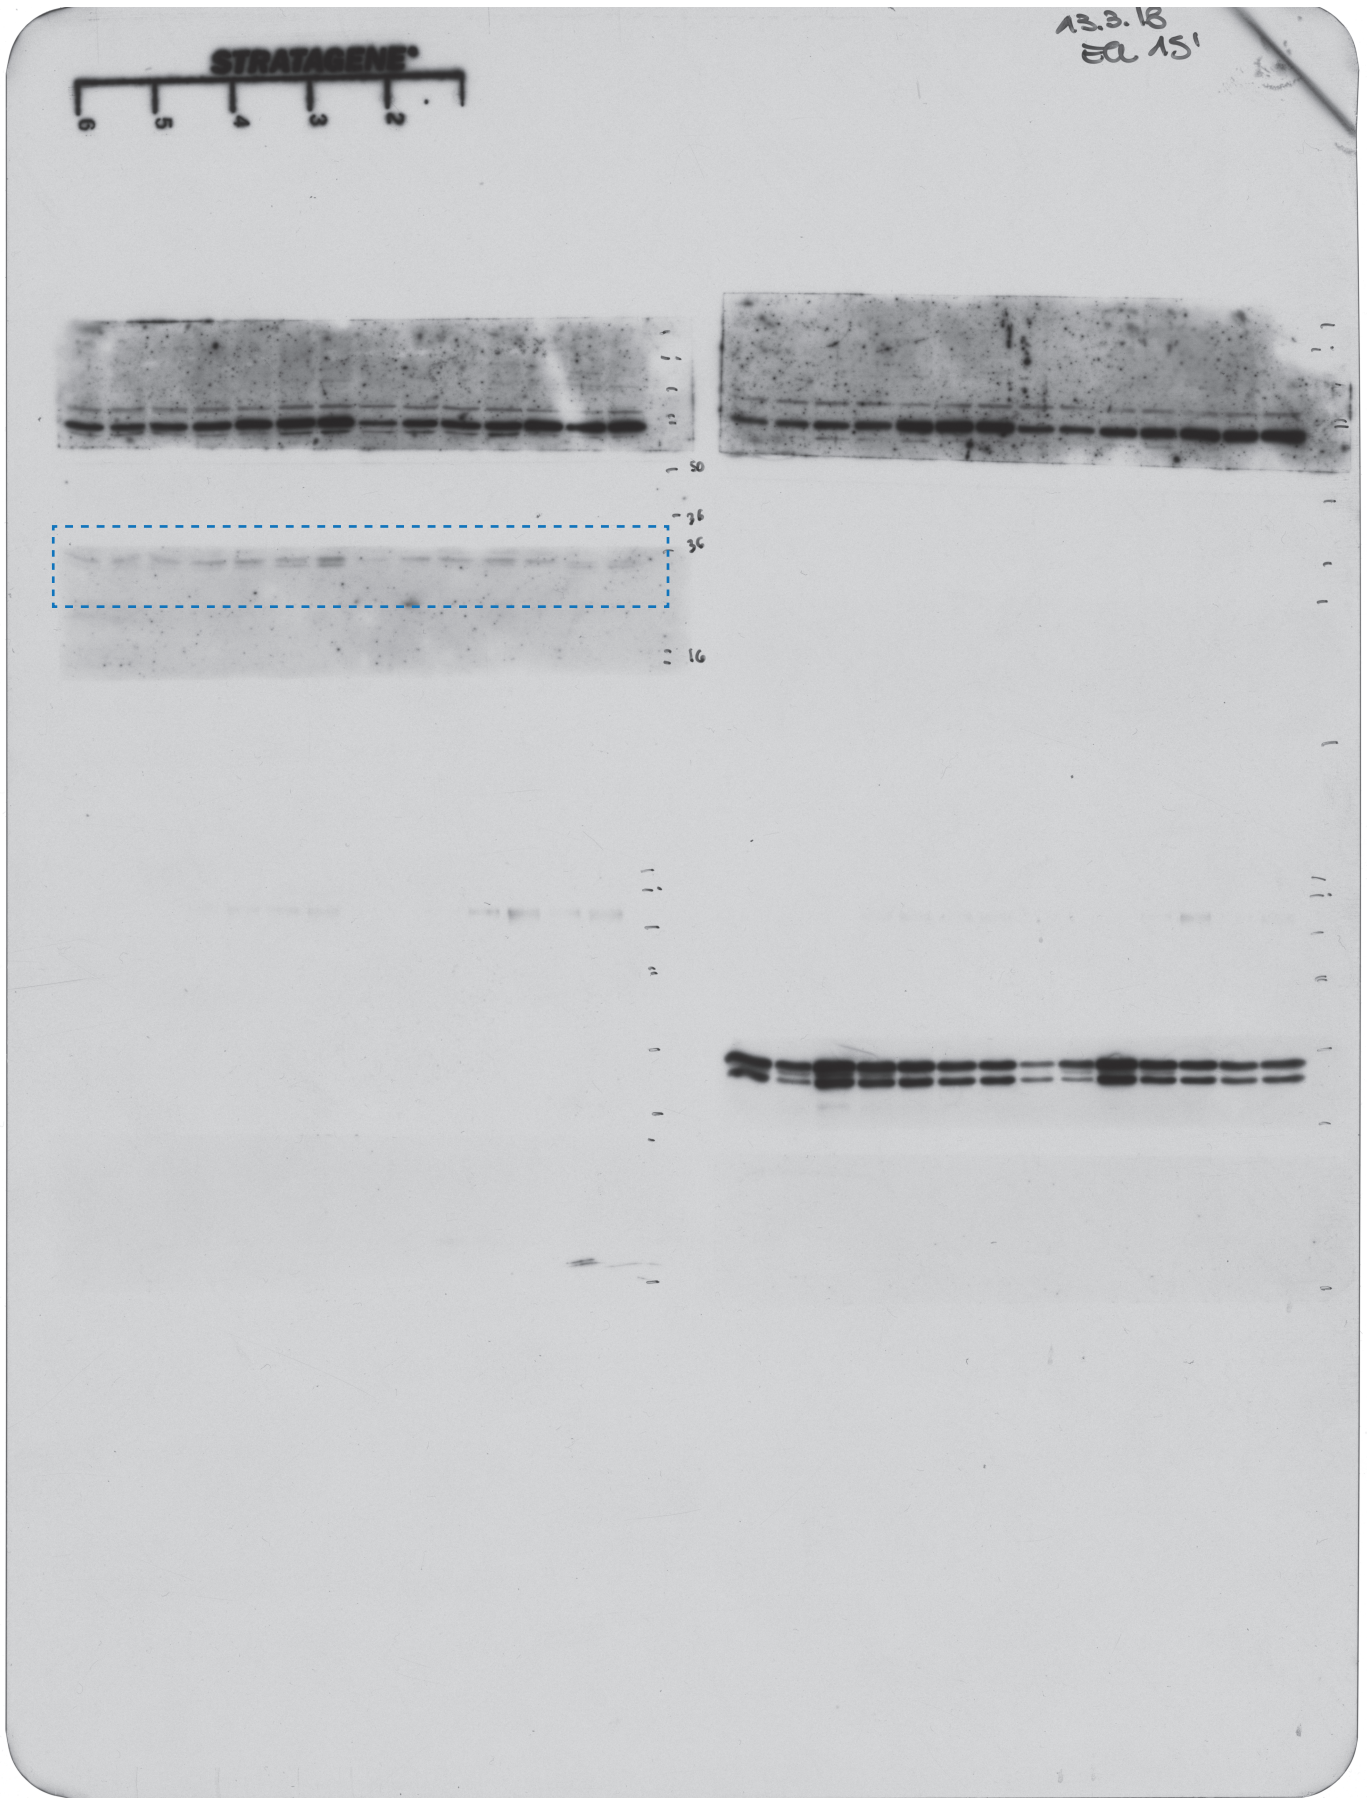

Supplement: elife-75873-fig4-data2.pdf [file elife-75873-fig4-data2.pdf]
