# Supplementary material for: Macrophage inflammation resolution requires CPEB4-directed offsetting of mRNA degradation
Source: PubMed Central journal article supplement (PMC9094754; doi:10.7554/elife.75873), 2022-04-20

Black Box. Figure 6B. P-ERK

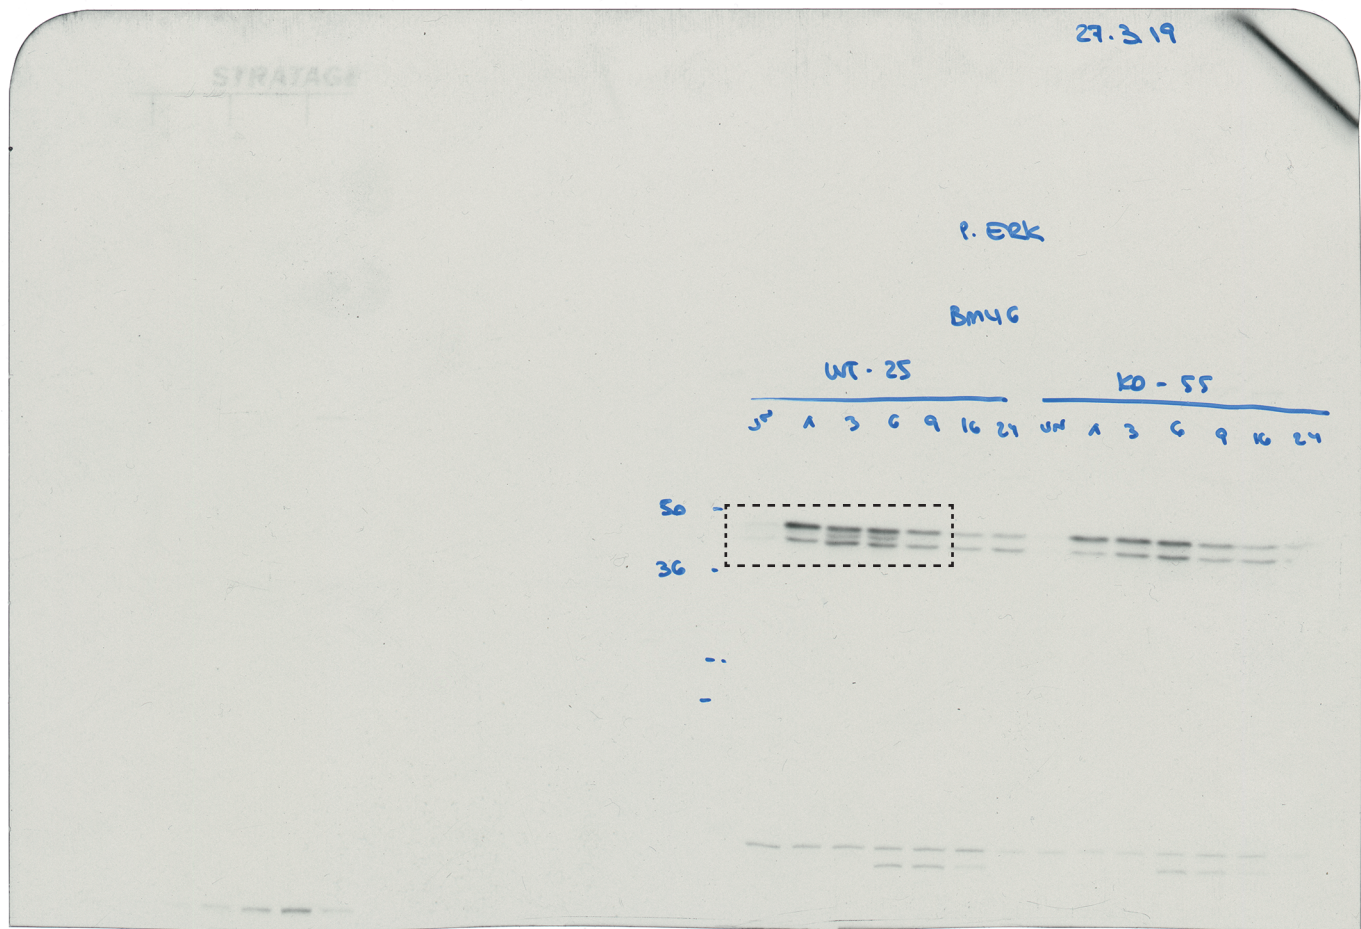

Black Box. Figure 6B. Vinculin for P-ERK

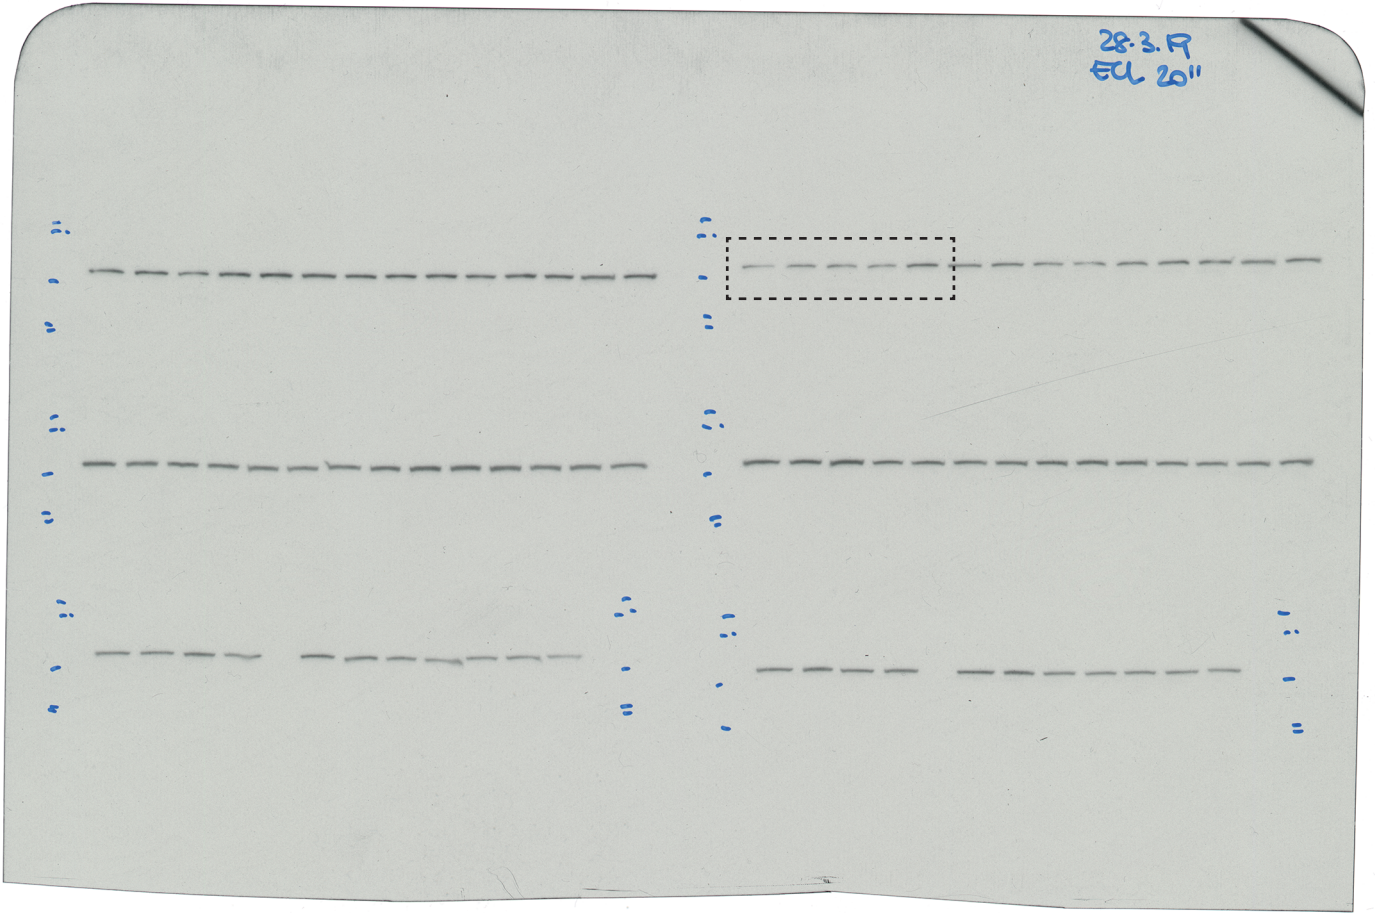



Black Box. Figure 6B. CPEB4

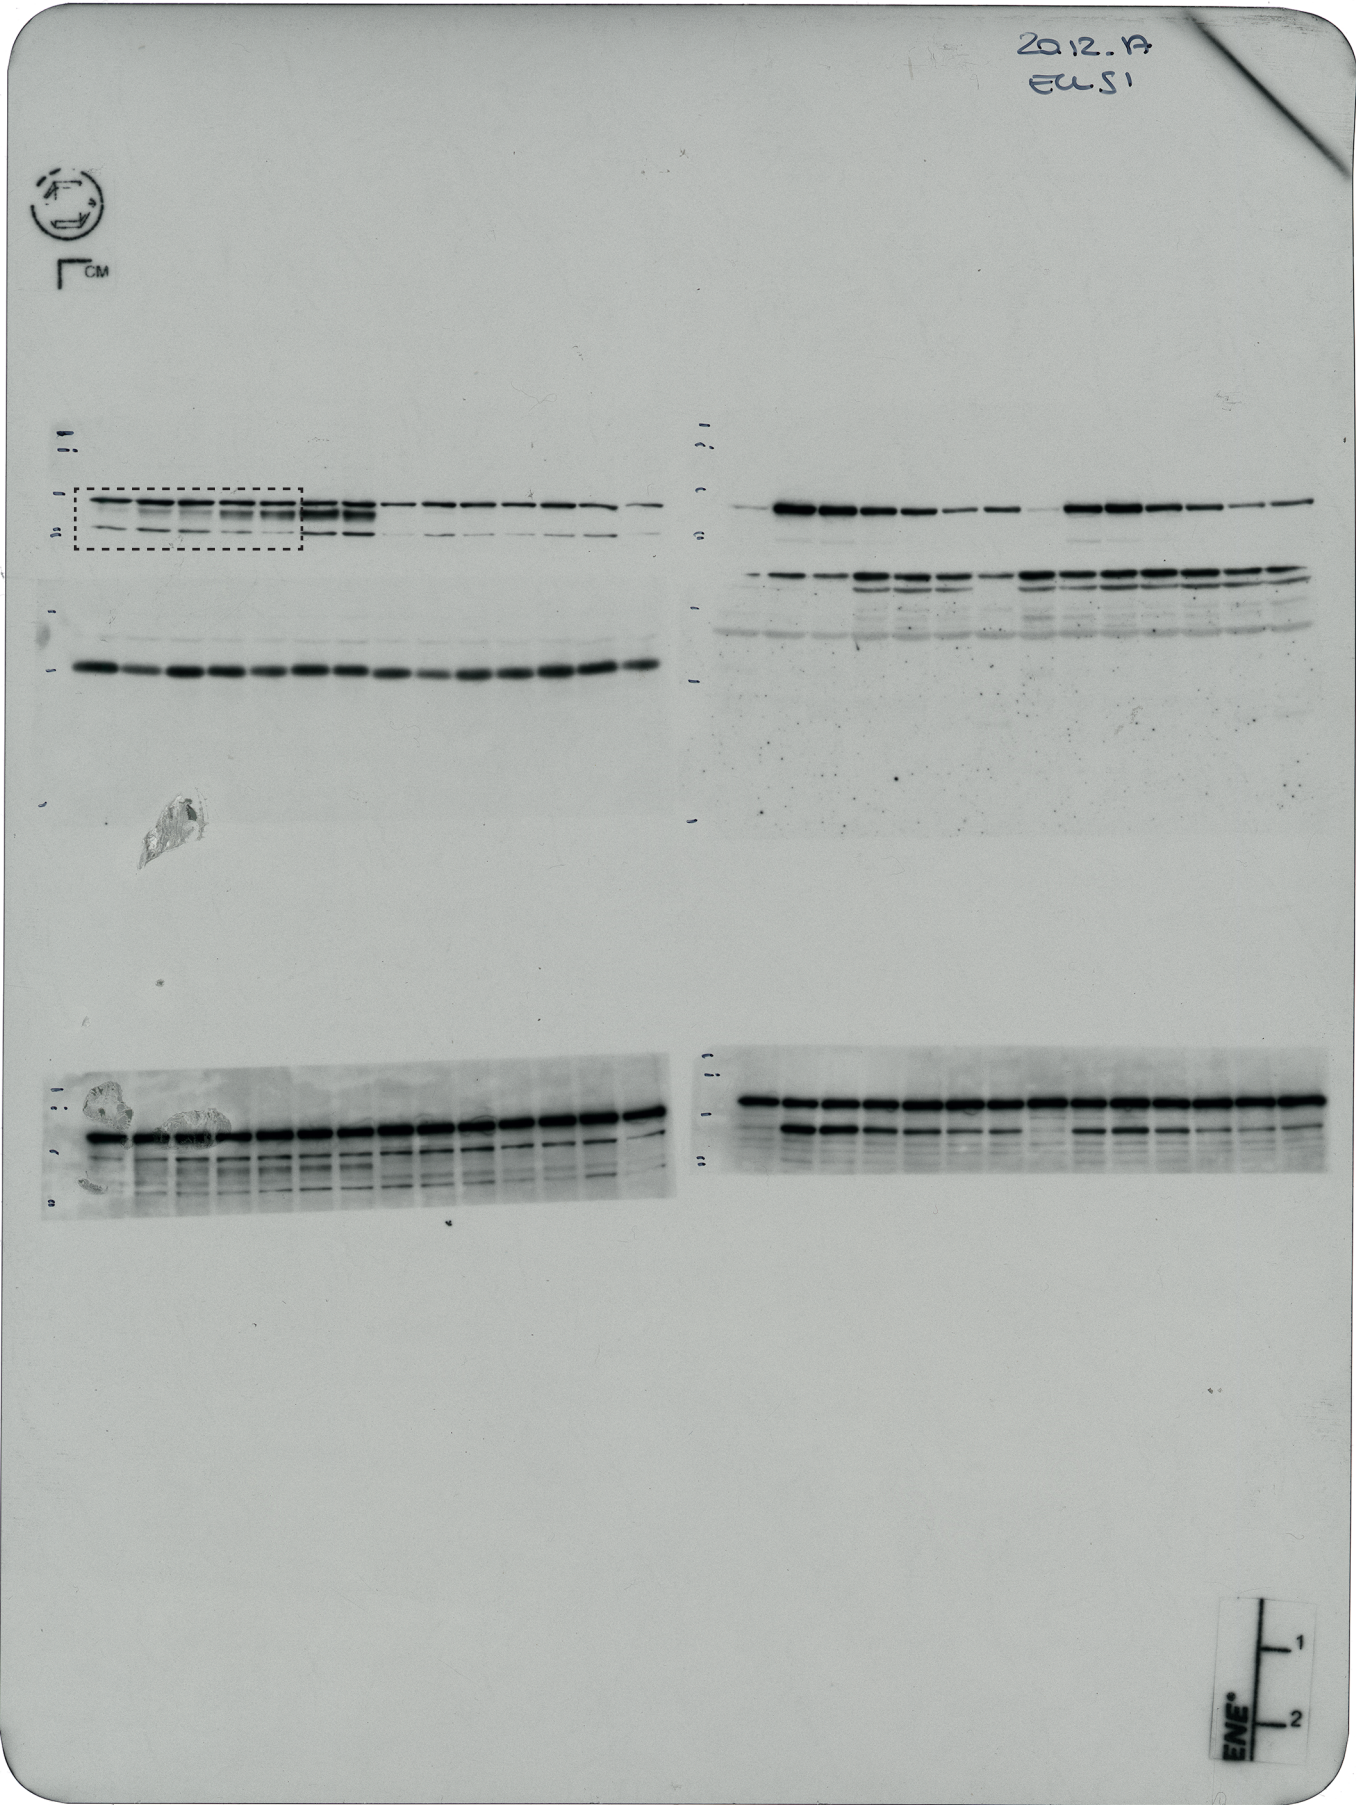



Black Box. Figure 6B. Vinculin for CPEB4

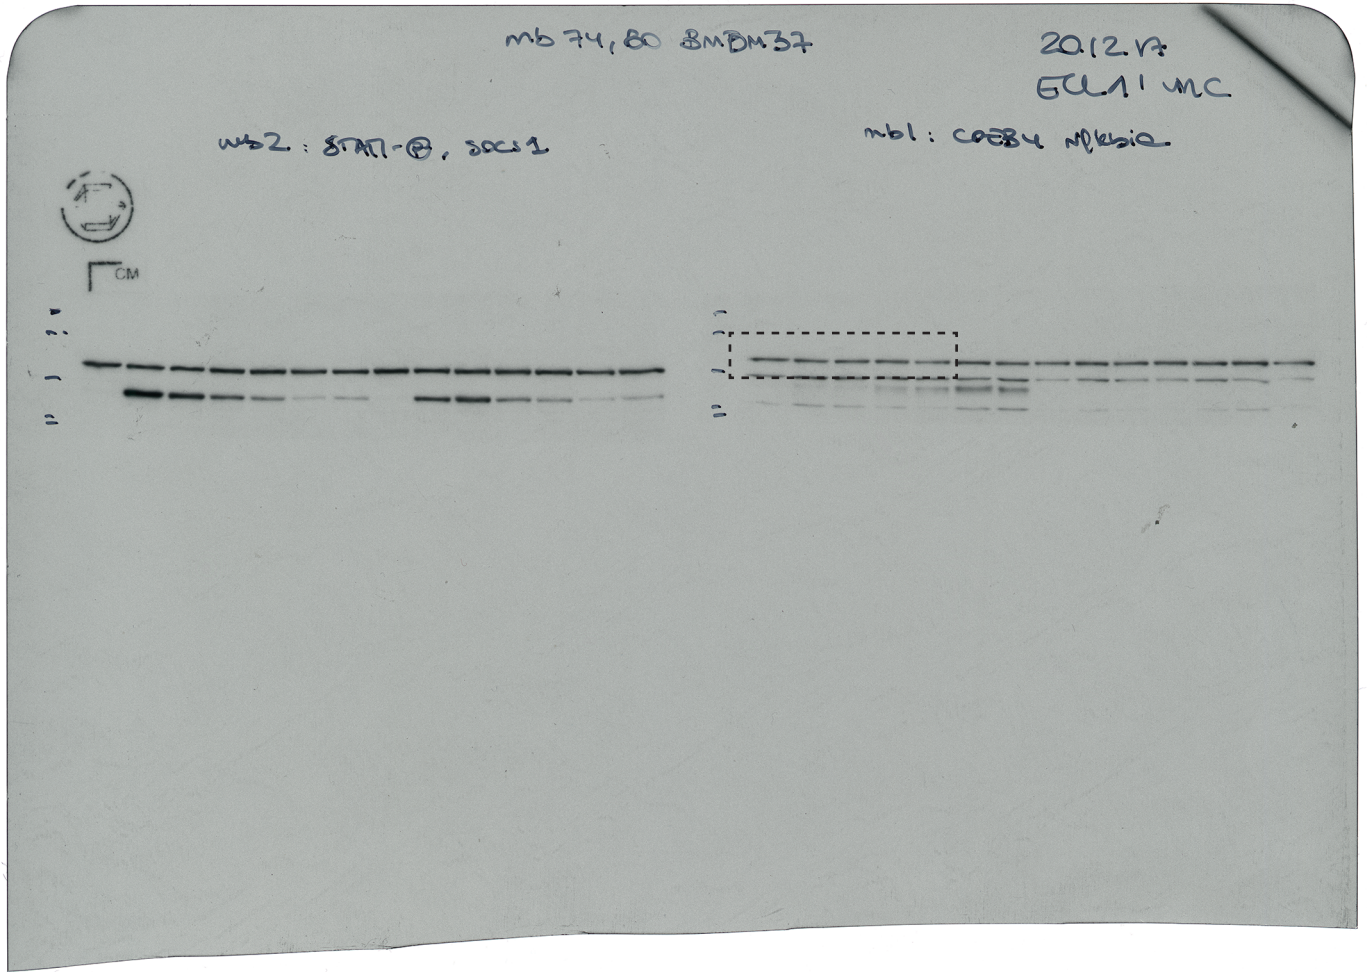







Black Box. Figure 6B. Vinculin for TTP

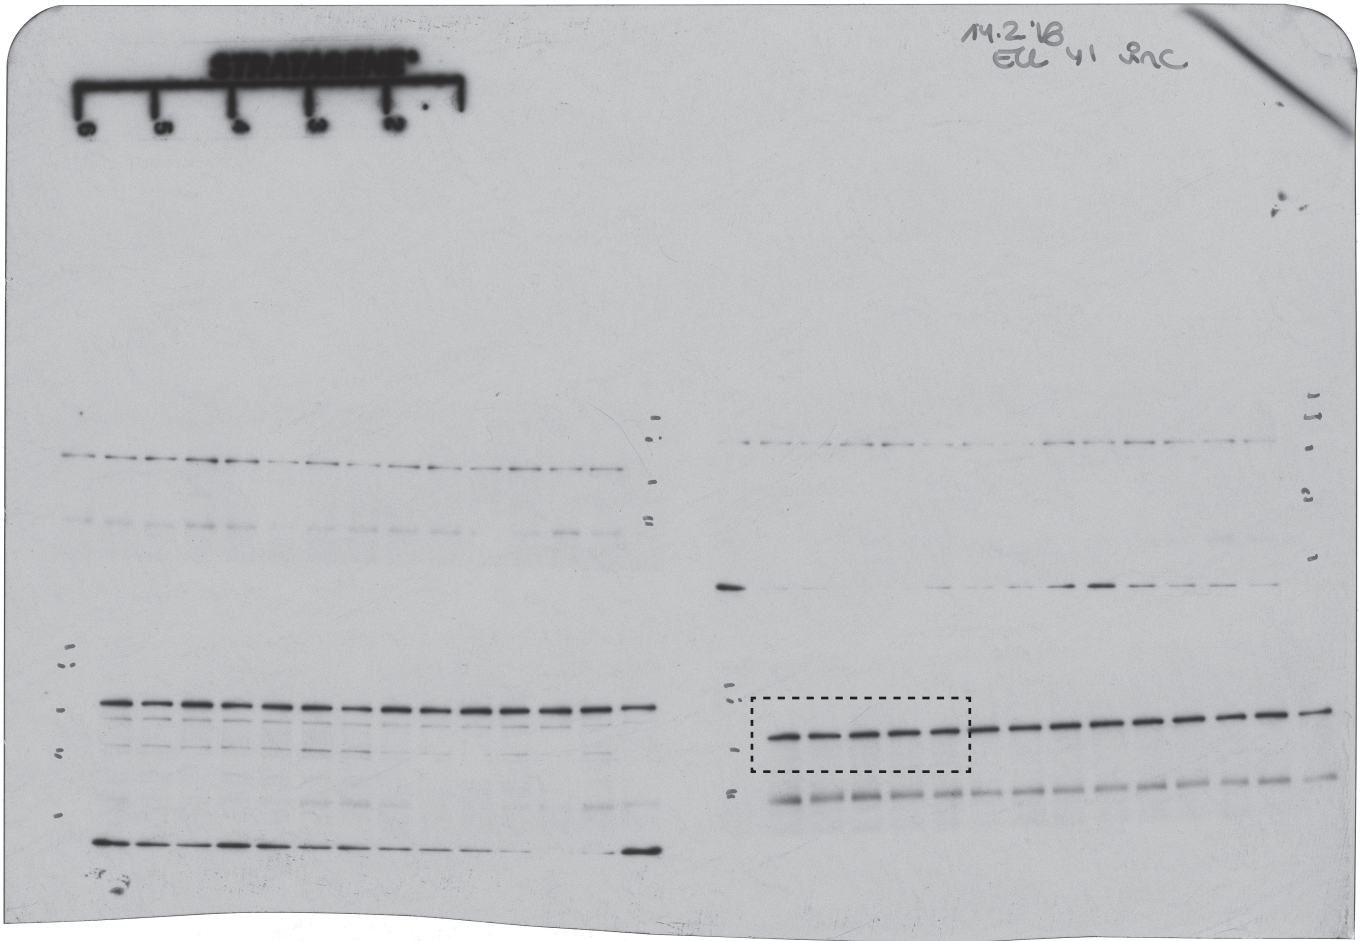



Black Box. Figure 6B. P-MK2 and Ponceau Staining

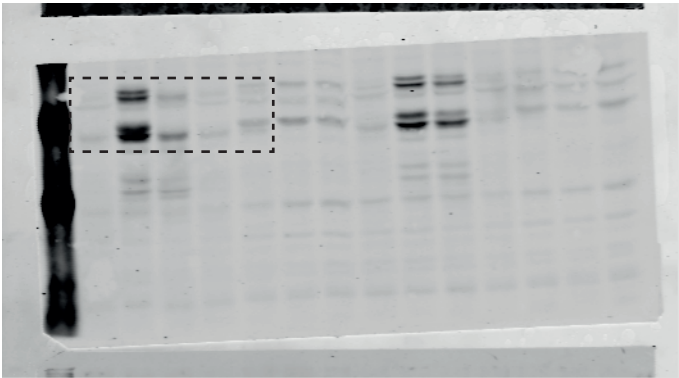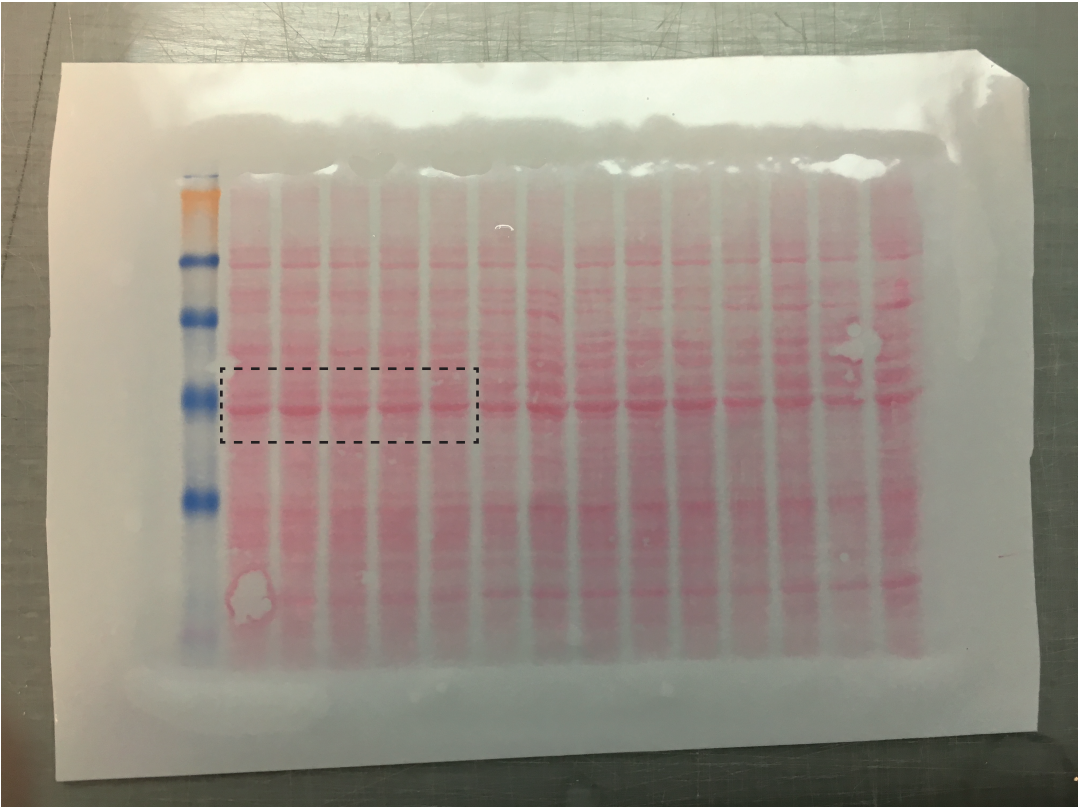

Black Box. Figure 6B. P-p38 and Ponceau Staining

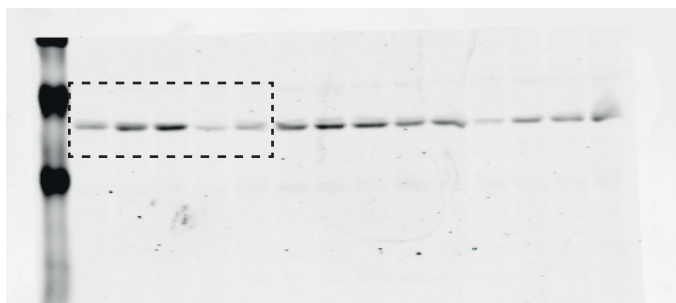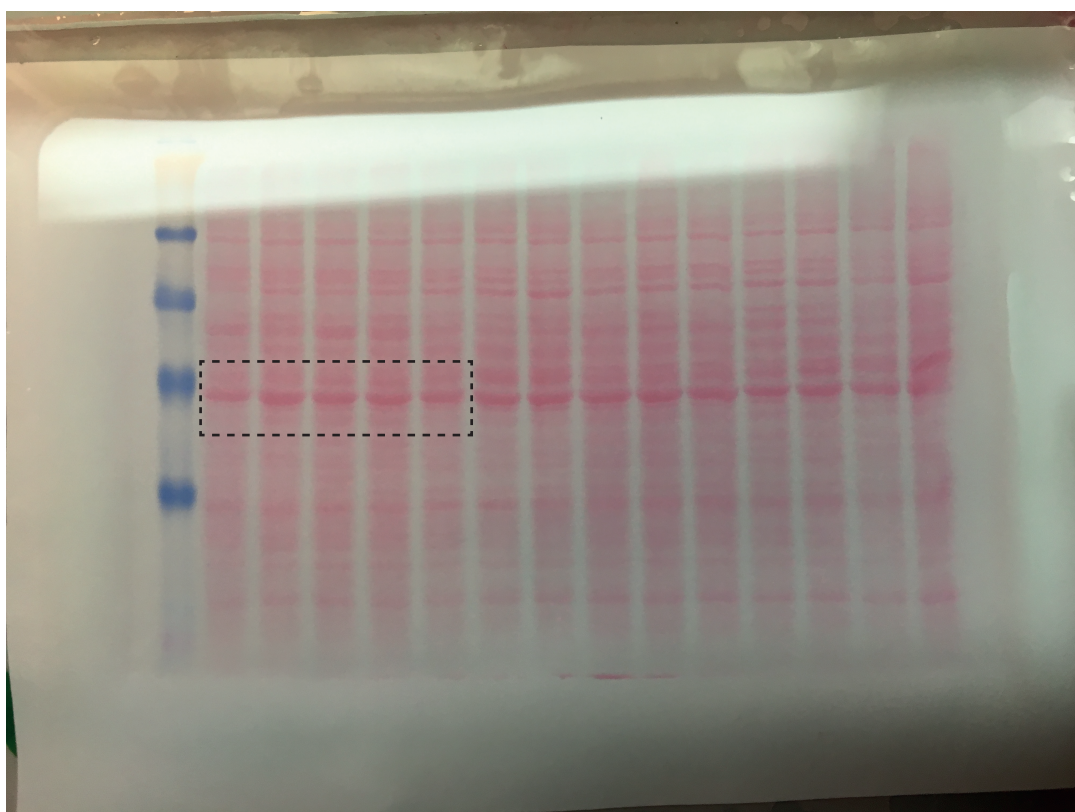

Supplement: elife-75873-fig6-data1.pdf [file elife-75873-fig6-data1.pdf]
