# Supplementary material for: Macrophage inflammation resolution requires CPEB4-directed offsetting of mRNA degradation
Source: eLife journal article supplement (doi:10.7554/elife.75873), 2022-04-20

Figure 2C. CPEB4. Replicates 1 and 2.

Red boxes (Replicate 1): Not shown in figure, but used for quantification.

Black boxes (Replicate 2): Fig 2C.

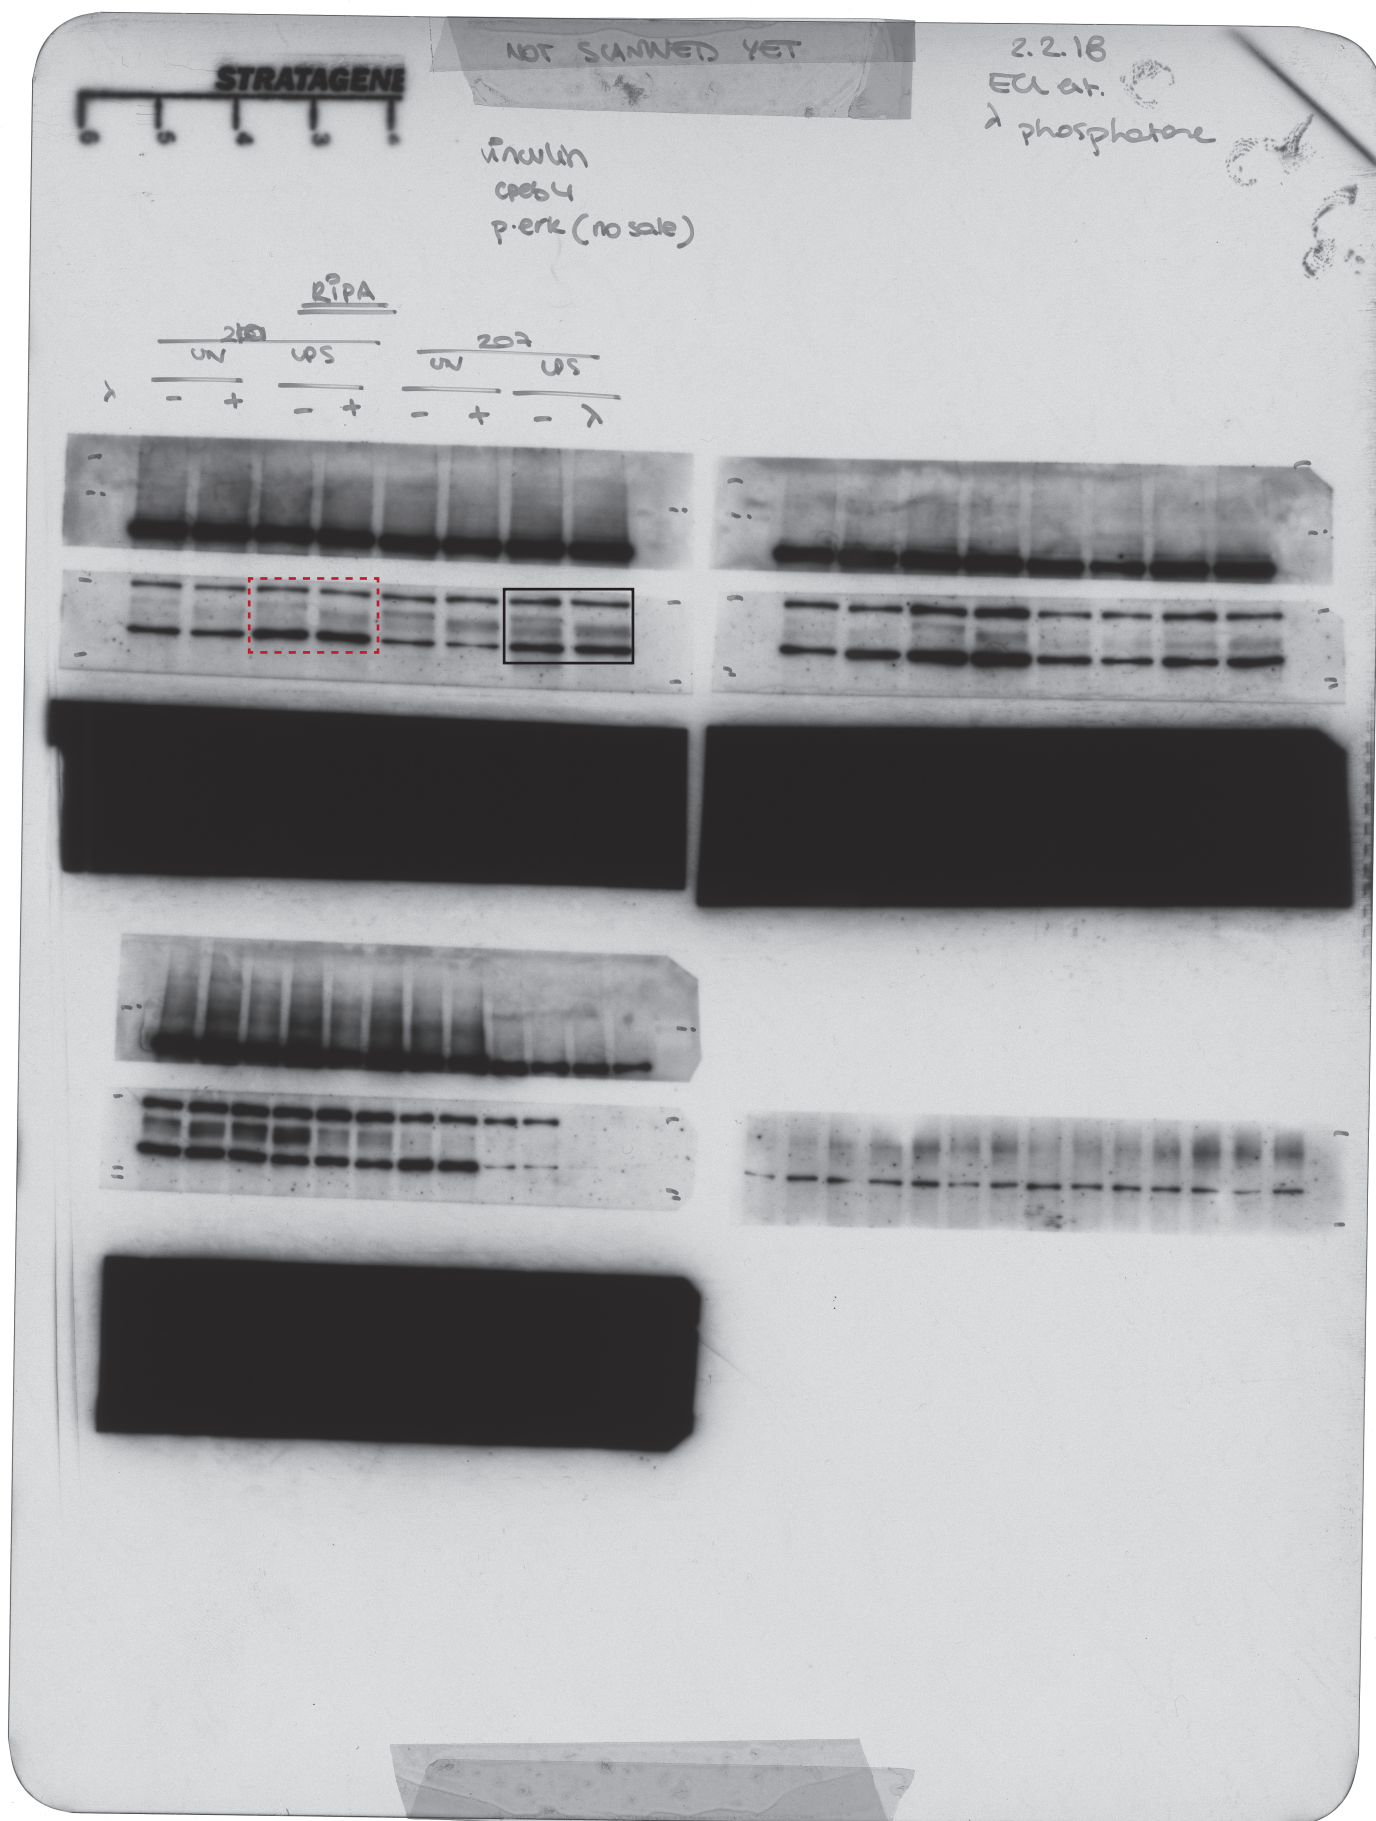



Figure 2C. Vinculin. Replicates 1 and 2.

Red boxes (Replicate 1): Not shown in figure, but used for quantification.

Black boxes (Replicate 2): Fig 2C.

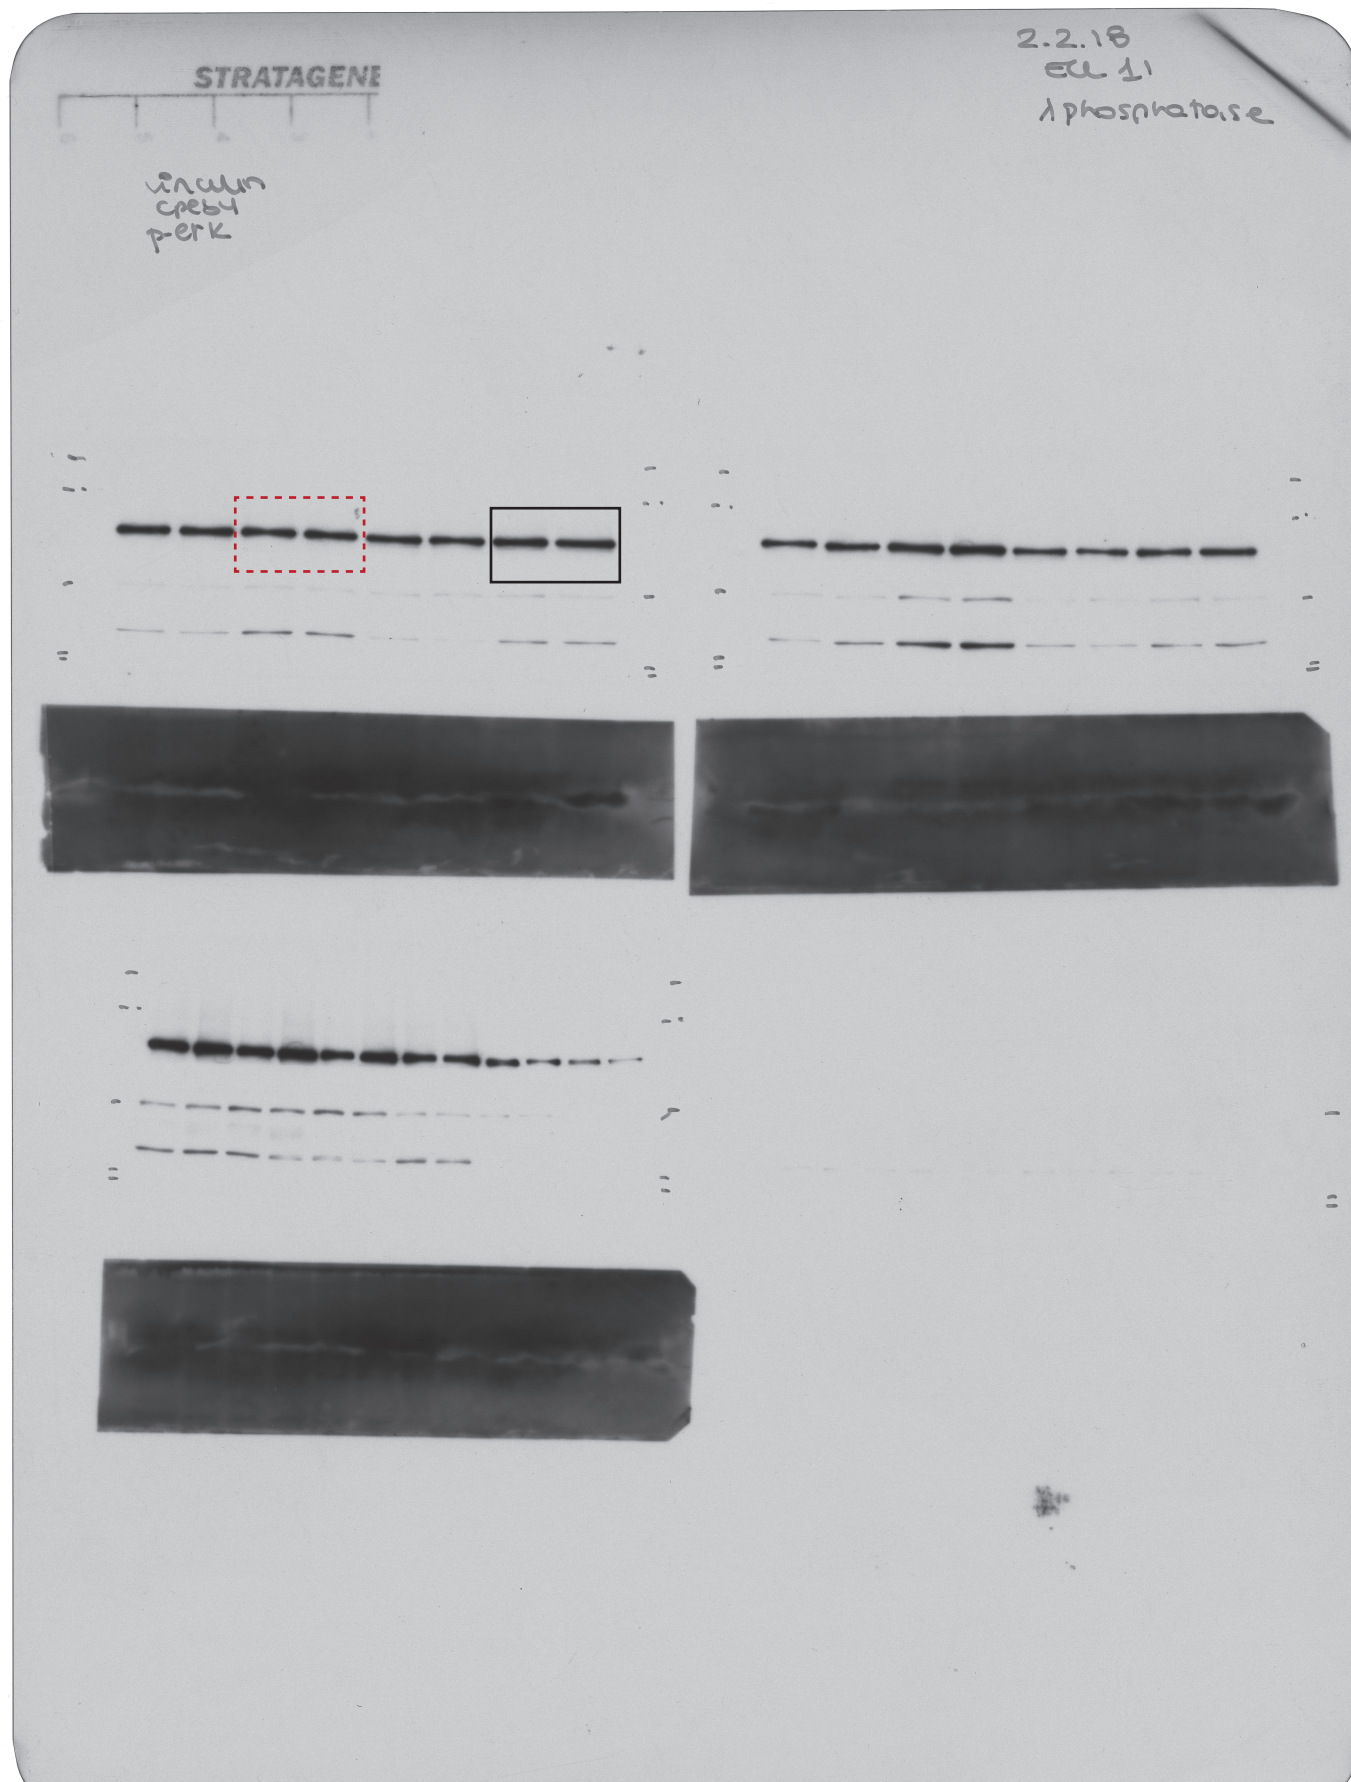



Figure 2C. Replicate 3 (not shown in figure, but used for quantification). CPEB4.

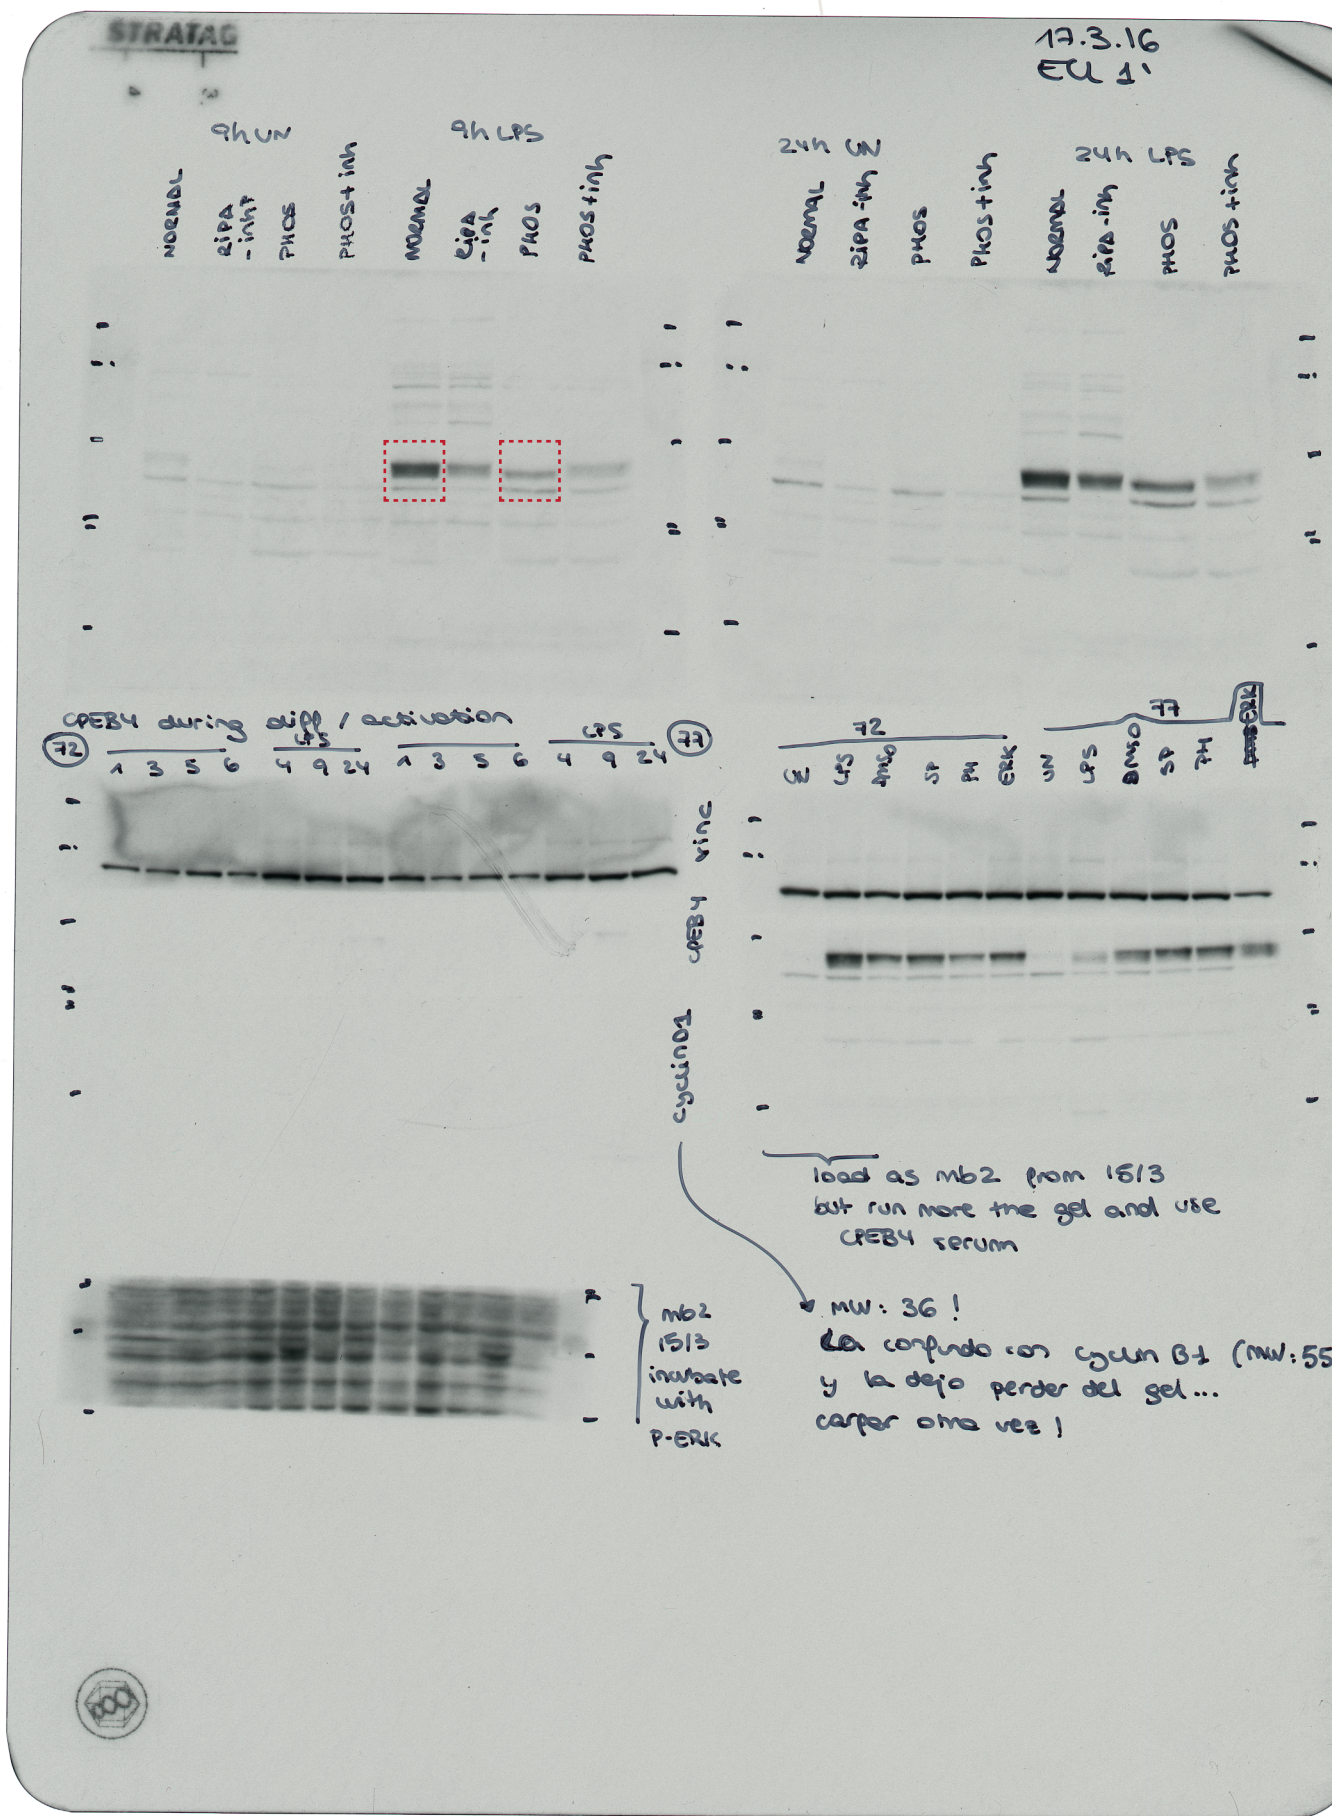



Figure 2C. Replicate 3 (not shown in figure, but used for quantification). Vinculin.

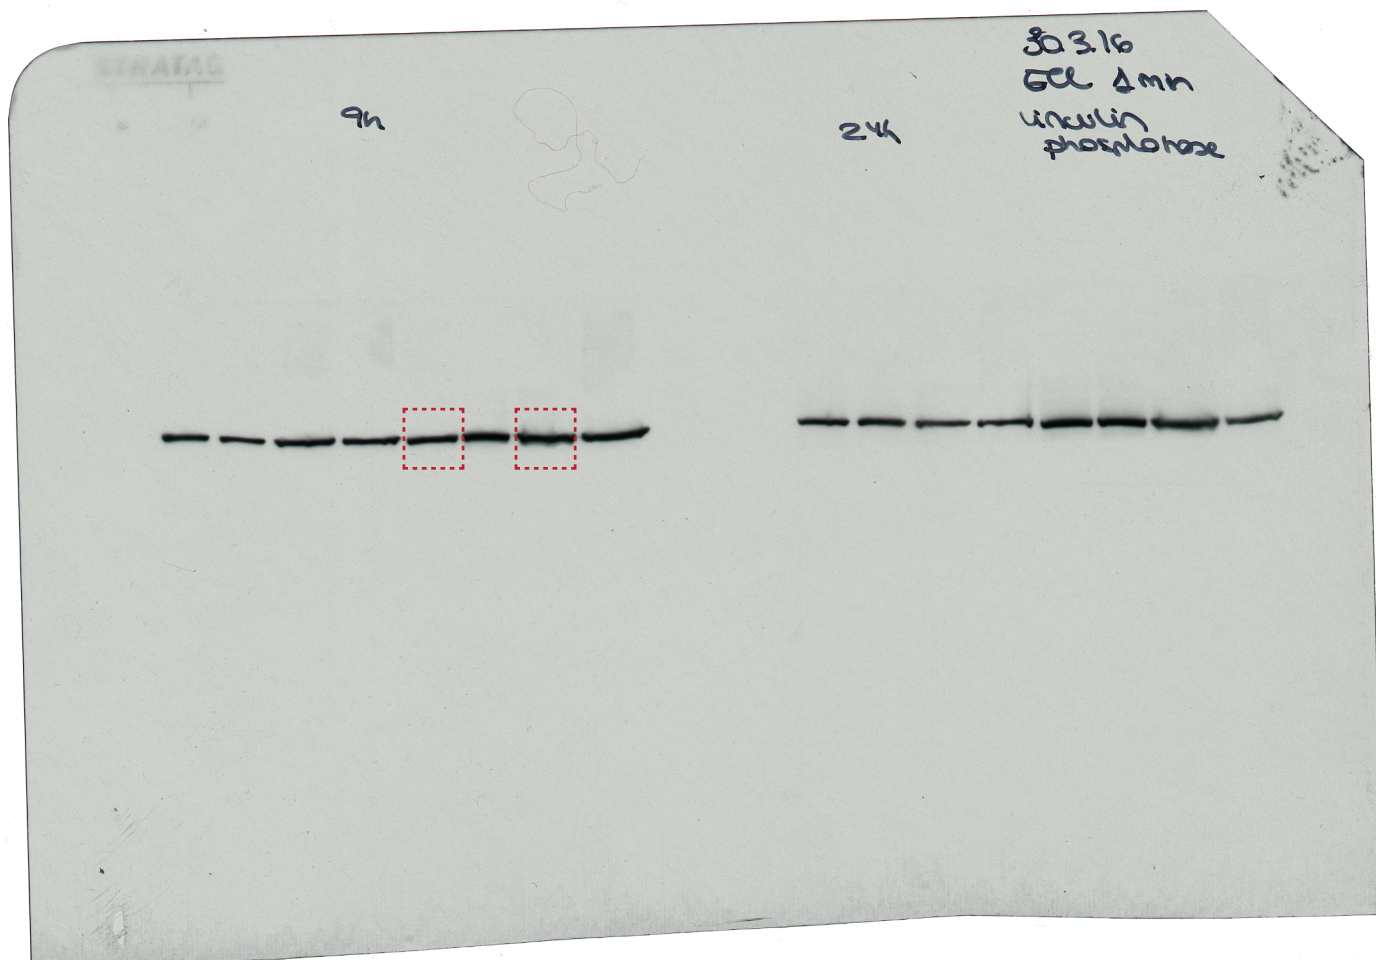

Supplement: fig2-data2 [file elife-75873-fig2-data2-v2.pdf]
