# Supplementary material for: Macrophage inflammation resolution requires CPEB4-directed offsetting of mRNA degradation
Source: eLife. 2022 Apr 20;11:e75873. doi: 10.7554/eLife.75873 (PMC9094754; doi:10.7554/eLife.75873)
Supplement: Supplementary file 1. — Wildtype and Cpeb4 KO BMDMs were stimulated with lipopolysaccharide (LPS) and mRNA levels were quantified by RNAseq (n = 4). Differential expression between genotype conditions was performed with DESeq2 R package. Wildtype and Cpeb4 KO samples were compared for each time point independently. Sample information, alignment statistics, and principal component analysis are shown. [file elife-75873-supp1.xlsx]

## Sheet: contWT_KOtimeAll.xls
			Comparison Wild type / Cpeb4KO done for every time point (un, 1h, 3h, 6h, 9h), independently.															rlog data
entrez	Symbol.UCSC	ensembl_gene_id	logfc.un	pval.un	padj.un	logfc.1h	pval.1h	padj.1h	logfc.3h	pval.3h	padj.3h	logfc.6h	pval.6h	padj.6h	logfc.9h	pval.9h	padj.9h	rlKOavg.un	rlWTavg.un	rlKOavg.1h	rlWTavg.1h	rlKOavg.3h	rlWTavg.3h	rlKOavg.6h	rlWTavg.6h	rlKOavg.9h	rlWTavg.9h
71661	0610005C13Rik	NA	-0.105139	0.907752	NA	0.00991929	0.992653	NA	1.24445	0.490873	NA	1.15241	0.367545	NA	0.696818	0.570527	NA	1.01708	1.06522	0.85638	0.857392	0.74858	0.553064	1.00384	0.801006	0.915022	0.714082
66050	0610009B22Rik	ENSMUSG00000007777	-0.251856	0.0281637	0.168348	-0.390973	0.00297989	0.0285644	-0.0977733	0.510106	0.742787	0.0938856	0.482242	0.730475	-0.159056	0.155648	0.34113	8.59988	8.76151	8.36096	8.6007	7.97894	7.98776	8.01461	8.01583	8.26886	8.36994
100125929	0610009E02Rik	NA	0.124311	0.7878	0.905895	0.284439	0.715107	NA	-0.485848	0.335484	0.607953	-0.11872	0.794066	0.914039	0.0708384	0.889169	0.946311	3.3358	3.27628	2.91351	2.79044	3.90377	3.91861	3.59643	3.85929	3.50607	3.44675
66838	0610009L18Rik	ENSMUSG00000101520	-0.58387	0.00359922	0.0509196	-0.542943	0.0431504	0.125204	-0.231857	0.395825	0.656923	-0.398045	0.146381	0.379787	-0.134247	0.623121	0.786496	5.97639	6.3482	5.67618	5.97795	5.68293	5.73634	5.50898	5.83932	5.51395	5.57524
100039060	0610010B08Rik	ENSMUSG00000078886	NA	NA	NA	NA	NA	NA	NA	NA	NA	NA	NA	NA	NA	NA	NA	0	0	0	0	0	0	0	0	0	0
71675	0610010F05Rik	ENSMUSG00000042208	0.211289	0.00697175	0.0782351	0.201437	0.0368687	0.114316	0.262929	0.010586	0.0981664	0.130629	0.147424	0.381076	0.113983	0.28768	0.498745	9.60114	9.45795	9.81981	9.66664	9.73957	9.59147	9.72217	9.61813	9.612	9.53321
104457	0610010K14Rik	ENSMUSG00000020831	-0.190095	0.169093	0.43219	-0.406404	0.0189405	0.0773493	-0.11184	0.474316	0.716798	0.386225	0.00682388	0.0440063	0.231349	0.0394625	0.134721	9.06123	9.17572	8.88835	9.1347	8.63602	8.72775	8.53259	8.27406	8.74006	8.58668
106264	0610012G03Rik	NA	-0.219644	0.113438	0.352857	-0.543346	0.0280225	0.0967169	-0.221487	0.120542	0.358391	-0.00213638	0.986842	0.996477	-0.19589	0.199215	0.39793	10.2503	10.3836	9.85324	10.1708	9.45827	9.62285	9.50852	9.49386	9.91884	10.0523
78687	0610025J13Rik	NA	NA	NA	NA	NA	NA	NA	NA	NA	NA	NA	NA	NA	NA	NA	NA	0	0	0	0	0	0	0	0	0	0
68364	0610030E20Rik	ENSMUSG00000058706 /// ENSMUSG00000108680	0.2461	0.0270384	0.164971	0.421771	0.00464885	0.03594	0.343027	0.000322457	0.009882	0.0263979	0.729023	0.88316	0.173772	0.0566196	0.174688	10.0666	9.89288	9.70615	9.42386	10.0024	9.65429	10.3061	10.4274	10.3195	10.1976
68369	0610031O16Rik	NA	NA	NA	NA	NA	NA	NA	NA	NA	NA	NA	NA	NA	NA	NA	NA	0	0	0	0	0	0	0	0	0	0
74098	0610037L13Rik	ENSMUSG00000028608	-0.154489	0.15068	0.407773	-0.296195	0.0374621	0.115217	-0.0879782	0.530918	0.754166	0.118291	0.298396	0.572761	-0.0754164	0.512927	0.705303	9.00977	9.1016	8.95533	9.12261	9.3382	9.34638	9.44511	9.42435	9.34439	9.38907
70345	0610038B21Rik	NA	0.312795	0.535244	NA	0.451097	0.487439	NA	-0.253758	0.806045	NA	0.032608	0.961726	NA	-0.181268	0.762288	0.874169	2.78943	2.62192	2.67767	2.44016	2.25568	2.12567	2.38793	2.60337	2.76294	2.78073
68386	0610039K10Rik	NA	-3.6879	0.0042002	NA	-1.62002	0.0821126	NA	-2.51181	0.0280489	NA	-3.04707	0.00165358	NA	-2.6954	0.0189683	NA	0.903727	1.78166	1.19946	1.70065	1.04546	1.89973	1.22774	2.38201	1.04942	1.79132
67672	0610040B10Rik	NA	-0.422536	0.22919	0.505012	-0.49013	0.264631	0.410622	-0.430695	0.450972	NA	-0.0206168	0.976778	NA	-0.191869	0.742059	NA	3.60878	3.85419	3.54986	3.81797	3.29974	3.41588	2.89534	3.01678	3.07272	3.15354
75394	0610040F04Rik	NA	1.23211	0.628962	NA	-0.878034	0.717921	NA	1.23803	0.724405	NA	-1.19623	0.733507	NA	NA	NA	NA	-1.53662	-1.64379	-1.61812	-1.51312	-1.55086	-1.65686	-1.64758	-1.53668	-1.66739	-1.66674
76261	0610040J01Rik	ENSMUSG00000060512	-0.863761	0.0385892	0.19782	-0.486016	0.341421	NA	-0.921297	0.170452	NA	-0.930189	0.487283	NA	0.491313	0.785018	NA	2.61872	3.11577	2.51829	2.76563	2.17362	2.64225	1.73065	1.91482	1.60846	1.56642
68400	0610043K17Rik	NA	0.00414184	0.996718	NA	0.876788	0.625257	NA	-0.00150898	0.998804	NA	-0.626067	0.284477	0.558508	-0.00444425	0.994355	NA	1.6404	1.59057	1.34954	1.23035	2.1138	1.79897	2.01415	2.7488	2.1724	2.17841
100043040	1110002L01Rik	NA	-0.0363358	0.913055	0.961893	0.126019	0.790893	NA	0.0124112	0.984523	NA	-0.170818	0.70786	0.871876	-0.22318	0.536577	0.723459	3.97621	3.99585	3.49169	3.41085	3.2983	3.16623	3.62492	3.86835	4.03519	4.17519
56372	1110004F10Rik	ENSMUSG00000030663	0.070402	0.620067	0.815395	-0.0831086	0.673651	0.778637	-0.025804	0.816097	0.920655	0.101383	0.237278	0.506022	-0.0144253	0.851214	0.92631	10.9687	10.9023	10.986	10.9983	11.0456	10.9937	11.0294	11.0386	10.9915	10.9976
66123	1110006O24Rik	NA	-0.265907	0.283958	0.559069	-0.57463	0.108886	0.225474	-0.358254	0.403686	0.664226	-0.199209	0.624067	0.823386	-0.103898	0.790079	0.891541	4.94697	5.1318	4.11916	4.41297	4.16821	4.36821	4.39174	4.48898	4.52064	4.65066
68500	1110008E08Rik	NA	NA	NA	NA	NA	NA	NA	NA	NA	NA	NA	NA	NA	NA	NA	NA	0	0	0	0	0	0	0	0	0	0
66132	1110008L16Rik	ENSMUSG00000021023	-0.060992	0.646702	0.829717	-0.0757082	0.543668	0.673845	0.179141	0.332904	0.605209	0.143612	0.361875	0.633861	-0.172659	0.208871	0.409403	7.48172	7.5154	7.54531	7.5759	7.24705	7.08428	7.30207	7.27753	7.4634	7.5697
73737	1110008P14Rik	ENSMUSG00000039195	-0.582643	1.41783e-05	0.000963139	-0.867989	8.74892e-05	0.00337818	-0.51942	0.00157194	0.0303071	-0.204476	0.039988	0.160343	-0.281624	0.0410543	0.138967	9.16149	9.52922	9.07545	9.59516	9.27478	9.58788	9.38431	9.54859	9.49866	9.69316
68618	1110012L19Rik	ENSMUSG00000045237	-0.296586	0.0543163	0.239493	-0.3497	0.082379	0.187247	-0.21337	0.162944	0.421127	0.0796157	0.590876	0.802632	-0.188949	0.129166	0.302315	7.86122	8.04205	7.76484	7.96259	7.49358	7.60153	7.65404	7.64236	7.98614	8.11007
100503859	1110015O18Rik	NA	NA	NA	NA	NA	NA	NA	NA	NA	NA	NA	NA	NA	NA	NA	NA	0	0	0	0	0	0	0	0	0	0
73721	1110017D15Rik	ENSMUSG00000028441	-0.871106	0.174331	NA	-0.359969	0.408268	0.554493	-0.0924807	0.892238	NA	0.107268	0.857267	0.941982	-0.946475	0.110646	NA	2.46536	2.80677	3.2417	3.41437	2.95189	2.83758	2.96426	3.02262	2.69819	3.14218
76311	1110019D14Rik	NA	0.116709	0.50138	0.738298	0.0804795	0.642045	0.754975	0.348282	0.117375	0.354032	-0.0884599	0.741238	0.889688	0.0587409	0.822399	0.910653	6.30539	6.21616	6.38894	6.31621	5.98538	5.86986	5.8355	5.78722	5.56874	5.5229
68531	1110020A21Rik	NA	-0.45045	0.278926	0.554113	-0.511876	0.280543	NA	-0.694923	0.340163	NA	0.319932	0.785916	NA	0.338185	0.684484	NA	2.98558	3.28344	2.69649	2.95808	2.32289	2.52307	2.06135	2.03931	2.34638	2.21348
68584	1110020C17Rik	NA	NA	NA	NA	NA	NA	NA	NA	NA	NA	NA	NA	NA	NA	NA	NA	0	0	0	0	0	0	0	0	0	0
68690	1110028F11Rik	NA	NA	NA	NA	NA	NA	NA	NA	NA	NA	NA	NA	NA	NA	NA	NA	0	0	0	0	0	0	0	0	0	0
68692	1110028F18Rik	NA	NA	NA	NA	NA	NA	NA	NA	NA	NA	0.767352	0.828094	NA	0.706689	0.841496	NA	-2.33437	-2.33483	-2.3277	-2.32813	-2.309	-2.32365	-2.32107	-2.31987	-2.31176	-2.3264
68721	1110032A03Rik	ENSMUSG00000037971	-0.115099	0.269516	0.5446	-0.159533	0.234283	0.377518	-0.100984	0.513144	0.743871	-0.318079	0.0874342	0.271326	-0.194342	0.254318	0.461628	7.87633	7.94864	7.65341	7.73981	7.23222	7.38784	6.93191	7.04595	6.98722	7.09887
68725	1110032F04Rik	ENSMUSG00000046999	0.734173	0.835418	NA	-0.537147	0.360276	NA	0.216352	0.212368	0.481433	0.1456	0.510178	0.748326	0.925821	0.0238797	0.0954827	2.80679	2.76637	3.58197	3.76194	6.33295	6.27128	6.03299	5.84606	4.80979	4.25731
68697	1110036E04Rik	NA	NA	NA	NA	NA	NA	NA	NA	NA	NA	NA	NA	NA	-0.735979	0.83502	NA	-2.40068	-2.40093	-2.39715	-2.39738	-2.3951	-2.39501	-2.39365	-2.39301	-2.39656	-2.38863
68763	1110038B12Rik	NA	-0.0634366	0.56158	0.774903	-0.349751	0.010328	0.0555565	-0.0498566	0.705677	0.857645	0.123803	0.259325	0.531884	-0.182769	0.176279	0.369086	9.86542	9.89913	9.83001	10.0424	9.62141	9.72275	9.45048	9.30792	9.19166	9.306
117171	1110038F14Rik	ENSMUSG00000063236	-0.0652057	0.593008	0.798592	-0.313563	0.107491	0.223558	-0.33722	0.0636476	0.262387	0.12585	0.136858	0.364445	0.193919	0.146698	0.327326	9.60018	9.6289	9.33394	9.4926	10.4084	10.5185	10.5329	10.5593	9.96368	9.83155
68808	1110046J04Rik	NA	-0.00455482	0.982357	0.992148	-0.73415	0.0373824	0.115116	-0.126029	0.690426	0.849096	0.12393	0.710144	0.872812	-0.12559	0.697494	0.834725	5.84689	5.83757	5.52619	5.92472	5.16108	5.22288	5.20521	5.12532	5.2484	5.33933
228356	1110051M20Rik	ENSMUSG00000040591	-0.508971	0.000450041	0.0129049	-0.240897	0.120358	0.241656	-0.499258	0.00280065	0.0435279	-0.168306	0.430949	0.693115	-0.436841	0.0120622	0.0595742	7.07443	7.4188	7.23555	7.37975	6.65686	7.05382	6.5247	6.55671	6.61915	6.89127
66206	1110059E24Rik	ENSMUSG00000035171	-0.133565	0.236054	0.512005	-0.0823865	0.60567	0.724995	-0.181734	0.198215	0.465097	0.0612353	0.550037	0.775403	-0.0555331	0.647855	0.802726	8.82694	8.90178	8.86341	8.88945	9.12774	9.20981	9.0764	9.08365	8.95924	8.99323
66202	1110059G10Rik	ENSMUSG00000032551	-0.0704462	0.403921	0.666222	-0.198703	0.106329	0.22185	-0.0685786	0.558952	0.771085	-0.0805855	0.412778	0.679109	0.0351168	0.729315	0.854788	9.11429	9.15388	9.00668	9.11486	8.9946	9.0215	9.00504	9.08481	8.85205	8.82554
68920	1110065P20Rik	ENSMUSG00000078570	-0.289508	0.0668061	0.267076	-0.486401	0.0129923	0.0630104	-0.259965	0.186424	0.448929	-0.137496	0.455725	0.711475	-0.135933	0.408478	0.61834	6.89897	7.0781	6.76033	7.04747	6.80169	6.9354	6.80811	6.92871	6.99775	7.08205
68861	1190002N15Rik	ENSMUSG00000045414	-0.0349438	0.717512	0.868367	0.0586871	0.702916	0.80101	0.0646914	0.699642	0.854137	0.132009	0.278277	0.550822	0.499758	0.00307041	0.0220984	9.57723	9.59202	9.53858	9.47698	8.65185	8.69933	8.72823	8.56666	9.04742	8.71374
68918	1190005I06Rik	ENSMUSG00000043687	-0.592031	0.0652469	0.263431	-0.561038	0.211372	0.351447	-0.739698	0.240365	NA	0.0630204	0.956818	NA	-0.733771	0.146327	0.326956	3.93918	4.34114	3.62607	3.994	2.80404	3.50123	2.96668	2.65595	3.17423	3.56469
544717	1190007I07Rik	ENSMUSG00000063320	-0.216587	0.136948	0.387345	-0.484432	0.0504541	0.138045	-0.202075	0.458667	0.70602	0.206438	0.471235	0.72242	-0.0591347	0.792036	0.892644	6.57432	6.71688	6.27493	6.55024	5.88916	5.97771	5.69158	5.61756	5.8681	5.89892
100043489	1300002E11Rik	NA	0.0700101	0.725867	0.871792	0.0259577	0.905434	0.942346	0.382411	0.228174	0.498618	0.499167	0.141976	0.372546	0.607839	0.00336355	0.0236981	5.87309	5.82685	5.69331	5.66235	5.3755	5.29833	5.42804	5.03159	6.04514	5.643
71775	1300017J02Rik	ENSMUSG00000033688	-0.726305	0.656138	NA	0.641431	0.690413	NA	-0.859072	0.622649	NA	0.88357	0.713082	NA	1.18511	0.583348	NA	-0.465225	-0.376257	-0.304143	-0.442936	-0.25363	-0.296142	-0.536585	-0.530079	-0.337505	-0.50346
76683	1500002F19Rik	NA	-0.724319	0.674219	NA	0.595213	0.61338	NA	-1.45166	0.46807	NA	-0.48618	0.741649	NA	-0.172162	0.895546	NA	0.0257041	0.131471	0.388249	0.209962	0.0471259	0.221868	0.205053	0.35957	0.259776	0.275802
319830	1500004A13Rik	NA	0.197146	0.510405	0.74354	0.755394	0.0775723	0.179929	0.828638	0.0136574	0.11414	0.225054	0.445791	0.703044	0.246128	0.330373	0.542595	5.54512	5.40128	4.84986	4.38062	5.17498	4.61667	5.1585	5.09241	5.54803	5.40075
76505	1500009C09Rik	NA	NA	NA	NA	NA	NA	NA	NA	NA	NA	NA	NA	NA	NA	NA	NA	0	0	0	0	0	0	0	0	0	0
69784	1500009L16Rik	ENSMUSG00000087651	0.734173	0.835418	NA	-0.727633	0.836864	NA	0.623446	0.859961	NA	0.770665	0.778575	NA	NA	NA	NA	-2.03945	-2.07598	-2.05892	-2.02454	-2.0142	-2.04925	-1.97223	-2.00478	-2.05625	-2.05582
66236	1500011B03Rik	NA	-0.219981	0.0545716	0.240202	-0.348506	0.12953	0.253119	-0.010916	0.95717	0.982012	-0.0783968	0.508916	0.747569	-0.230329	0.114307	0.280818	8.78003	8.92165	8.18343	8.38715	8.3961	8.31147	8.68901	8.84575	9.02581	9.18679
68954	1500012K07Rik	NA	NA	NA	NA	NA	NA	NA	NA	NA	NA	NA	NA	NA	NA	NA	NA	0	0	0	0	0	0	0	0	0	0
68982	1500015A07Rik	NA	-0.0433774	0.81225	0.918381	0.0340422	0.860082	0.912186	0.0499543	0.835947	0.928898	-0.124524	0.505824	0.745521	-0.201596	0.256638	0.464228	6.80621	6.84179	6.32583	6.2919	6.55009	6.48142	6.59229	6.69854	6.50045	6.62449
68994	1500015L24Rik	NA	NA	NA	NA	1.2572	0.720527	NA	1.15753	0.741992	NA	NA	NA	NA	-0.735979	0.83502	NA	-2.13703	-2.13794	-2.06566	-2.12477	-2.05803	-2.11596	-2.11089	-2.10853	-2.12171	-2.09224
78896	1500015O10Rik	ENSMUSG00000026051	0.145511	0.924246	NA	-0.170871	0.937898	NA	1.22992	0.589593	NA	0.767352	0.828094	NA	1.19502	0.602041	NA	-0.894318	-0.940102	-1.01945	-1.02151	-0.927961	-1.06474	-1.0523	-1.11748	-0.94409	-1.07954
70258	1500035N22Rik	NA	0.519777	0.853583	NA	1.28019	0.715472	NA	NA	NA	NA	NA	NA	NA	NA	NA	NA	-2.08309	-2.10858	-2.07196	-2.12213	-2.11491	-2.11465	-2.11034	-2.10834	-2.11953	-2.11923
320309	1520401A03Rik	ENSMUSG00000043747	-0.579242	0.542013	NA	-0.154049	0.856511	NA	-1.32684	0.372233	NA	1.69877	0.238109	NA	0.729497	0.669656	NA	0.826416	0.997555	1.04842	1.07733	0.59137	0.957009	1.10976	0.728367	0.716446	0.597071
69776	1600002D24Rik	NA	-1.27044	0.717505	NA	-0.729604	0.451565	NA	-2.81793	0.085524	NA	0.513798	0.632377	NA	-1.08404	0.286376	NA	0.229154	0.350291	0.742592	0.982911	0.48414	0.811179	0.875954	0.837215	0.694678	1.08405
69770	1600002K03Rik	ENSMUSG00000035595	-0.297221	0.0795965	0.294614	-0.79911	0.000808702	0.0141334	-0.414365	0.017362	0.131076	0.0982628	0.495486	0.738784	-0.172759	0.335736	0.548125	8.0678	8.24473	7.91321	8.39994	7.79829	8.00259	7.81836	7.81515	7.81208	7.93425
69781	1600010M07Rik	NA	-0.560057	0.000295824	0.00966028	-0.758782	0.00278385	0.0273261	-0.803529	0.00864334	0.0869172	-0.197432	0.701383	0.867076	-0.235139	0.393694	0.603865	6.55221	6.94449	6.15575	6.64327	4.96679	5.59356	4.71841	4.65715	5.37421	5.50242
67912	1600012H06Rik	ENSMUSG00000050088	0.000551527	0.994603	0.996579	0.04663	0.542591	0.673118	-0.0366676	0.692584	0.850196	-0.0385458	0.595305	0.805309	-0.198005	0.0120529	0.0595551	10.3104	10.3035	10.1321	10.0855	10.4974	10.4448	10.6007	10.715	10.557	10.6874
72025	1600012P17Rik	NA	NA	NA	NA	NA	NA	NA	NA	NA	NA	NA	NA	NA	NA	NA	NA	0	0	0	0	0	0	0	0	0	0
72244	1600014C10Rik	ENSMUSG00000054676	-0.00608595	0.955872	0.981129	0.0888737	0.547813	0.676946	0.453791	0.00200669	0.0356568	0.161697	0.102031	0.301007	0.422467	0.000130867	0.00195071	9.77276	9.77046	9.61365	9.55037	11.0648	10.3804	11.8354	12.1185	12.2279	11.9147
72240	1600014C23Rik	ENSMUSG00000094690	0.86884	0.721813	NA	-0.418486	0.792509	NA	0.623446	0.859961	NA	-0.675316	0.848446	NA	0.354844	0.832743	NA	-1.06463	-1.18613	-1.0202	-0.969801	-1.13904	-1.20559	-1.19349	-1.11837	-0.953624	-1.0146
69761	1600015I10Rik	ENSMUSG00000029813	NA	NA	NA	NA	NA	NA	NA	NA	NA	NA	NA	NA	NA	NA	NA	0	0	0	0	0	0	0	0	0	0
69768	1600019K03Rik	NA	NA	NA	NA	NA	NA	NA	NA	NA	NA	-0.675316	0.848446	NA	NA	NA	NA	-2.40143	-2.40171	-2.39736	-2.39762	-2.39499	-2.39489	-2.39332	-2.38356	-2.39668	-2.39657
72012	1600020E01Rik	NA	-0.0831715	0.556522	0.770976	-0.144361	0.463884	0.605445	-0.119418	0.587928	0.789062	-0.0394237	0.845345	0.936591	-0.23561	0.252048	0.459198	6.92734	6.97427	6.99108	7.06673	6.72755	6.76871	6.72997	6.79283	6.40899	6.55643
72030	1600025M17Rik	NA	NA	NA	NA	NA	NA	NA	0.623446	0.859961	NA	NA	NA	NA	NA	NA	NA	-2.40042	-2.40065	-2.39708	-2.3973	-2.38773	-2.39506	-2.39377	-2.39317	-2.39652	-2.39643
69797	1600029I14Rik	NA	-0.708495	0.841097	NA	NA	NA	NA	0.39819	0.903421	NA	-1.43025	0.67825	NA	NA	NA	NA	-2.0752	-2.0406	-2.05911	-2.06017	-1.97832	-2.01365	-2.04315	-1.96882	-2.05642	-2.05599
665268	1600029O15Rik	NA	1.26065	0.408115	NA	-1.54816	0.312874	NA	0.253752	0.887272	NA	-0.103001	0.952028	NA	1.72035	0.418514	NA	-0.00305016	-0.183297	-0.26298	-0.0212142	0.00732544	-0.18073	-0.227932	-0.0752886	-0.131305	-0.320788
75434	1700001C02Rik	ENSMUSG00000029182	NA	NA	NA	NA	NA	NA	NA	NA	NA	NA	NA	NA	NA	NA	NA	0	0	0	0	0	0	0	0	0	0
75462	1700001C19Rik	ENSMUSG00000047150 /// ENSMUSG00000116001	-0.125992	0.804951	NA	-1.04438	0.142605	NA	1.22393	0.398725	NA	2.49142	0.347071	NA	-0.570543	0.776028	NA	1.95082	2.01098	1.43021	1.92045	1.17408	0.933178	1.06236	0.765818	0.846116	0.916972
69279	1700001D01Rik	NA	0.734173	0.835418	NA	NA	NA	NA	1.55116	0.622761	NA	-0.675316	0.848446	NA	0.706689	0.841496	NA	-2.03943	-2.07575	-2.05878	-2.05982	-1.94388	-2.04917	-2.04303	-2.00496	-2.0209	-2.0557
71826	1700001F09Rik	ENSMUSG00000095384	NA	NA	NA	NA	NA	NA	NA	NA	NA	NA	NA	NA	NA	NA	NA	0	0	0	0	0	0	0	0	0	0
69303	1700001G11Rik	NA	-0.865512	0.37038	NA	-0.133783	0.867331	NA	-2.28827	0.0649536	NA	0.828025	0.4145	NA	0.647885	0.4213	NA	1.24025	1.50735	1.56897	1.58424	1.1591	1.62773	1.57334	1.38168	1.81457	1.54126
67503	1700001G17Rik	NA	0.582705	0.438648	NA	-0.626043	0.675361	NA	1.63986	0.401987	NA	2.34552	0.380008	NA	0.75817	0.674388	NA	0.837547	0.562093	0.101956	0.20843	0.324711	-0.0133226	0.0750695	-0.0701386	0.168037	0.102796
69282	1700001J03Rik	ENSMUSG00000095040	0.0752447	0.917348	NA	-0.285639	0.647433	NA	-0.552903	0.617297	NA	-0.699744	0.323833	NA	-0.832642	0.16822	NA	2.18752	2.20198	2.32371	2.4863	1.83622	1.97612	2.27994	2.7314	2.31294	2.70836
72224	1700001J11Rik	NA	NA	NA	NA	0.715035	0.83965	NA	NA	NA	NA	NA	NA	NA	NA	NA	NA	-2.40008	-2.4003	-2.39012	-2.39719	-2.39518	-2.39511	-2.39391	-2.39336	-2.39647	-2.39638
66323	1700001K19Rik	ENSMUSG00000056508	-0.387766	0.300524	0.575799	-0.503297	0.230898	0.373916	-0.216325	0.599182	0.796534	-0.501579	0.438846	0.698723	0.0671694	0.907808	NA	3.63313	3.84182	3.53914	3.81637	3.66773	3.88127	3.31825	3.44255	3.21845	3.17375
69319	1700001K23Rik	NA	2.75775	0.184656	NA	-0.727633	0.836864	NA	NA	NA	NA	NA	NA	NA	NA	NA	NA	-1.92575	-2.06766	-2.05407	-2.0267	-2.04668	-2.04637	-2.04146	-2.03917	-2.05194	-2.0516
69291	1700001L05Rik	NA	0.455561	0.0536357	0.238562	0.522139	0.0387153	0.117725	0.785243	0.0175162	0.13175	0.6914	0.00834604	0.0516556	1.02658	3.47339e-06	9.7004e-05	6.2944	5.96181	6.3084	5.94175	5.97733	5.52097	6.00097	5.52962	6.3163	5.64936
69315	1700001L19Rik	ENSMUSG00000021534	1.74028	0.467026	NA	NA	NA	NA	NA	NA	NA	NA	NA	NA	0.706689	0.841496	NA	-1.9531	-2.0395	-2.05427	-2.05512	-2.0468	-2.04649	-2.04153	-2.03922	-2.02362	-2.05178
73598	1700001O22Rik	ENSMUSG00000044320	1.01373	0.454947	NA	1.52843	0.124494	NA	0.742515	0.693504	NA	0.474047	0.803252	NA	0.440322	0.752447	NA	0.371942	0.202661	0.84257	0.366803	0.150987	0.160492	0.43513	0.252464	0.41359	0.319675
72215	1700001P01Rik	ENSMUSG00000018543	0.013295	0.995949	NA	0.498193	0.741355	NA	0.875639	0.646948	NA	0.179631	0.919415	NA	1.6338	0.248917	NA	-0.372809	-0.370799	-0.145674	-0.214091	0.0764855	-0.299788	-0.361631	-0.148676	0.0581179	-0.254144
69345	1700003C15Rik	NA	NA	NA	NA	NA	NA	NA	NA	NA	NA	NA	NA	NA	NA	NA	NA	0	0	0	0	0	0	0	0	0	0
69338	1700003D09Rik	NA	0.011528	0.996484	NA	0.715035	0.83965	NA	NA	NA	NA	-0.67014	0.486144	NA	0.199016	0.829692	NA	-0.0968337	-0.113895	-0.128032	-0.19614	-0.103698	-0.178899	0.299278	0.627417	0.467712	0.41324
71837	1700003E16Rik	ENSMUSG00000030030	0.500868	0.613751	NA	-0.311531	0.753065	NA	2.40393	0.317368	NA	-0.684426	0.800465	NA	-0.649607	0.491955	NA	0.891604	0.739704	0.749207	0.858706	0.590231	0.297307	0.373814	0.459943	0.771301	0.995172
100042663	1700003E24Rik	NA	NA	NA	NA	NA	NA	NA	NA	NA	NA	NA	NA	NA	NA	NA	NA	0	0	0	0	0	0	0	0	0	0
75480	1700003F12Rik	ENSMUSG00000038523	-0.304123	0.302258	0.577466	-0.241096	0.609422	0.728171	-0.165248	0.723245	0.868055	-0.328569	0.618029	NA	0.333458	0.480548	0.680245	4.3762	4.55025	4.13792	4.2093	3.85806	4.01855	3.46396	3.50501	3.8773	3.69987
72229	1700003G13Rik	NA	NA	NA	NA	NA	NA	NA	NA	NA	NA	NA	NA	NA	NA	NA	NA	0	0	0	0	0	0	0	0	0	0
69350	1700003G18Rik	NA	0.734173	0.835418	NA	NA	NA	NA	-0.819222	0.816674	NA	NA	NA	NA	-0.735979	0.83502	NA	-2.24816	-2.26776	-2.2586	-2.25916	-2.25362	-2.2344	-2.2501	-2.24856	-2.25717	-2.23793
384775	1700003H04Rik	NA	NA	NA	NA	NA	NA	NA	NA	NA	NA	NA	NA	NA	NA	NA	NA	0	0	0	0	0	0	0	0	0	0
75493	1700003L19Rik	NA	NA	NA	NA	NA	NA	NA	NA	NA	NA	NA	NA	NA	NA	NA	NA	0	0	0	0	0	0	0	0	0	0
72225	1700003M07Rik	NA	0.796891	0.629839	NA	1.3027	0.549501	NA	-0.4794	0.379716	NA	-0.468433	0.478088	0.727303	-0.00856364	0.989223	NA	1.37451	1.30455	1.36192	1.23752	2.6123	2.67762	2.15325	2.67558	2.25585	2.26061
75890	1700003P14Rik	NA	NA	NA	NA	NA	NA	NA	NA	NA	NA	NA	NA	NA	NA	NA	NA	0	0	0	0	0	0	0	0	0	0
71824	1700006A11Rik	ENSMUSG00000027973	NA	NA	NA	NA	NA	NA	NA	NA	NA	NA	NA	NA	NA	NA	NA	0	0	0	0	0	0	0	0	0	0
75432	1700006F04Rik	NA	NA	NA	NA	NA	NA	NA	NA	NA	NA	NA	NA	NA	NA	NA	NA	0	0	0	0	0	0	0	0	0	0
72257	1700006H21Rik	NA	NA	NA	NA	-1.28857	0.713768	NA	NA	NA	NA	NA	NA	NA	NA	NA	NA	-2.33259	-2.33297	-2.32703	-2.3027	-2.32379	-2.32366	-2.32151	-2.32051	-2.32609	-2.32595
321010	1700006J14Rik	NA	1.28951	0.0467345	NA	0.902691	0.17137	NA	0.659722	0.660942	NA	1.03059	0.607445	NA	2.3561	0.19431	NA	2.12323	1.4582	2.03553	1.57706	1.24945	1.12952	1.19334	0.95383	1.17993	0.835687
114672	1700007E05Rik	NA	NA	NA	NA	NA	NA	NA	NA	NA	NA	NA	NA	NA	NA	NA	NA	0	0	0	0	0	0	0	0	0	0
67850	1700007F19Rik	NA	NA	NA	NA	NA	NA	NA	NA	NA	NA	NA	NA	NA	NA	NA	NA	0	0	0	0	0	0	0	0	0	0
69320	1700007J10Rik	NA	0.885286	0.437378	NA	2.65873	0.0916644	NA	0.909977	0.471019	NA	0.236552	0.85157	NA	0.437352	0.655912	NA	0.828322	0.597068	0.794584	0.37936	0.973775	0.66853	0.822154	0.767725	0.953603	0.821765
69327	1700007K13Rik	ENSMUSG00000026831	1.65827	0.340181	NA	1.62824	0.616074	NA	0.875639	0.646948	NA	0.21512	0.923881	NA	-0.735979	0.83502	NA	-0.86238	-1.06565	-0.969651	-1.17595	-0.805227	-1.00653	-1.06694	-0.987118	-1.1682	-1.09597
100502742	1700007L15Rik	NA	-0.30049	0.391662	0.65585	-0.576707	0.121856	0.243553	-0.237869	0.564633	0.773909	-0.715202	0.170076	0.417364	-0.266922	0.516865	0.708314	4.39302	4.53818	4.12963	4.43806	4.08014	4.19415	3.74575	4.1264	3.99292	4.15887
69308	1700007P06Rik	NA	NA	NA	NA	NA	NA	NA	NA	NA	NA	0.767352	0.828094	NA	NA	NA	NA	-2.40165	-2.40195	-2.39742	-2.3977	-2.39496	-2.39486	-2.38382	-2.39246	-2.39671	-2.3966
629159	1700008J07Rik	NA	-0.0645293	0.738384	0.877289	-0.108068	0.619248	0.736351	0.248024	0.391716	0.653542	0.110826	0.730359	0.884036	-0.00266937	0.993007	0.996013	5.69741	5.73123	5.88322	5.93481	5.26055	5.16642	5.2377	5.12024	5.15295	5.17043
69311	1700008K24Rik	NA	NA	NA	NA	NA	NA	NA	NA	NA	NA	NA	NA	NA	NA	NA	NA	0	0	0	0	0	0	0	0	0	0
69349	1700008O03Rik	ENSMUSG00000008028	0.0445329	0.919085	0.964409	-0.656042	0.21088	NA	-1.85527	0.164623	NA	-1.52578	0.36095	NA	-1.24276	0.220629	NA	2.63313	2.60064	2.27544	2.63198	1.42283	1.79403	1.39059	1.65116	1.59081	1.95396
69347	1700008P02Rik	ENSMUSG00000069118	NA	NA	NA	NA	NA	NA	NA	NA	NA	NA	NA	NA	NA	NA	NA	0	0	0	0	0	0	0	0	0	0
74220	1700009C05Rik	NA	NA	NA	NA	NA	NA	NA	0.623446	0.859961	NA	NA	NA	NA	NA	NA	NA	-2.40099	-2.40125	-2.39724	-2.39748	-2.38673	-2.39496	-2.39351	-2.39284	-2.39661	-2.39651
75188	1700009J07Rik	NA	NA	NA	NA	NA	NA	NA	NA	NA	NA	NA	NA	NA	NA	NA	NA	0	0	0	0	0	0	0	0	0	0
75471	1700009N14Rik	ENSMUSG00000028287	NA	NA	NA	NA	NA	NA	NA	NA	NA	NA	NA	NA	NA	NA	NA	0	0	0	0	0	0	0	0	0	0
75485	1700010B08Rik	ENSMUSG00000057047	NA	NA	NA	-1.43117	0.685294	NA	1.3767	0.696391	NA	-0.675316	0.848446	NA	1.18086	0.64498	NA	-1.88365	-1.88508	-1.86308	-1.77311	-1.80545	-1.85062	-1.79701	-1.7933	-1.72265	-1.81342
100503661	1700010B13Rik	NA	-1.27044	0.717505	NA	NA	NA	NA	NA	NA	NA	NA	NA	NA	NA	NA	NA	-2.33146	-2.31023	-2.3266	-2.32692	-2.32377	-2.32366	-2.32178	-2.32091	-2.32579	-2.32566
76386	1700010D01Rik	ENSMUSG00000071721	NA	NA	NA	NA	NA	NA	NA	NA	NA	NA	NA	NA	NA	NA	NA	0	0	0	0	0	0	0	0	0	0
75500	1700010H22Rik	NA	NA	NA	NA	NA	NA	NA	NA	NA	NA	NA	NA	NA	NA	NA	NA	0	0	0	0	0	0	0	0	0	0
75476	1700010I02Rik	NA	NA	NA	NA	NA	NA	NA	-0.819222	0.816674	NA	NA	NA	NA	NA	NA	NA	-2.40073	-2.40097	-2.39716	-2.3974	-2.39509	-2.3871	-2.39363	-2.39299	-2.39657	-2.39647
66931	1700010I14Rik	ENSMUSG00000023873	-0.151882	0.403551	0.666014	0.0125524	0.957858	0.974179	0.0544475	0.856544	0.936821	-0.109494	0.680001	0.858236	0.135636	0.522461	0.712274	6.27984	6.37776	5.80331	5.77386	5.32536	5.23246	5.64349	5.78896	6.1453	6.05497
69355	1700010J16Rik	NA	NA	NA	NA	NA	NA	NA	NA	NA	NA	NA	NA	NA	NA	NA	NA	0	0	0	0	0	0	0	0	0	0
75501	1700010K23Rik	NA	NA	NA	NA	NA	NA	NA	NA	NA	NA	NA	NA	NA	NA	NA	NA	0	0	0	0	0	0	0	0	0	0
619808	1700010L04Rik	NA	0.6325	0.847844	NA	NA	NA	NA	NA	NA	NA	NA	NA	NA	NA	NA	NA	-2.23422	-2.24938	-2.257	-2.25744	-2.25315	-2.25299	-2.25043	-2.24923	-2.25589	-2.25571
100503727	1700011B04Rik	NA	NA	NA	NA	-0.00629435	0.998579	NA	0.0255903	0.986393	NA	0.0818674	0.931374	NA	-0.637154	0.187292	0.38366	0.507013	0.503042	0.633869	0.630506	0.89872	0.886265	1.37441	1.44165	2.1531	2.60718
67687	1700011L22Rik	ENSMUSG00000031682	1.12722	0.52744	NA	0.634323	0.59488	NA	-1.33063	0.603514	NA	0.767352	0.828094	NA	2.26842	0.363439	NA	-0.488413	-0.660446	-0.120491	-0.37849	-0.679801	-0.534587	-0.661206	-0.740548	-0.483822	-0.7654
75443	1700011M02Rik	NA	NA	NA	NA	NA	NA	NA	NA	NA	NA	NA	NA	NA	NA	NA	NA	0	0	0	0	0	0	0	0	0	0
76382	1700012A03Rik	ENSMUSG00000029766	NA	NA	NA	NA	NA	NA	NA	NA	NA	NA	NA	NA	NA	NA	NA	0	0	0	0	0	0	0	0	0	0
69324	1700012B07Rik	ENSMUSG00000020617	NA	NA	NA	NA	NA	NA	NA	NA	NA	NA	NA	NA	NA	NA	NA	0	0	0	0	0	0	0	0	0	0
69325	1700012B09Rik	ENSMUSG00000031927	-0.708495	0.841097	NA	-0.145434	0.921924	NA	-0.650035	0.248696	NA	-0.872528	0.419412	NA	0.214334	0.739915	NA	0.895156	0.950423	1.30964	1.40062	1.92938	2.55882	1.80039	1.79446	2.08809	1.97253
72243	1700012D01Rik	NA	-0.106257	0.770044	0.89471	0.144395	0.705214	0.80273	0.651543	0.262719	NA	-0.244205	0.608288	0.813139	0.371372	0.342688	0.554953	3.72964	3.78238	3.97175	3.88493	3.59871	3.20021	3.67596	4.01572	3.99282	3.77548
75479	1700012D14Rik	NA	0.0183897	0.974826	NA	-0.989959	0.294421	NA	-0.105011	0.880332	NA	-0.422362	0.552952	NA	0.15733	0.845571	NA	2.38799	2.39065	1.84859	2.16351	2.34348	2.40682	2.41032	2.60253	2.37649	2.26969
69334	1700012I11Rik	NA	NA	NA	NA	NA	NA	NA	NA	NA	NA	0.767352	0.828094	NA	NA	NA	NA	-2.40103	-2.40129	-2.39725	-2.3975	-2.39505	-2.39496	-2.3851	-2.39281	-2.39661	-2.39651
69364	1700012P22Rik	ENSMUSG00000028589	NA	NA	NA	NA	NA	NA	NA	NA	NA	NA	NA	NA	NA	NA	NA	0	0	0	0	0	0	0	0	0	0
76921	1700013D24Rik	ENSMUSG00000079346	-1.29106	0.449225	NA	-0.727633	0.836864	NA	0.623446	0.859961	NA	NA	NA	NA	-0.735979	0.83502	NA	-1.72602	-1.59829	-1.79269	-1.75094	-1.73838	-1.78094	-1.77346	-1.76996	-1.78944	-1.7459
75504	1700013F07Rik	ENSMUSG00000027886	-2.43015	0.276014	NA	-0.727633	0.836864	NA	-0.819222	0.816674	NA	NA	NA	NA	NA	NA	NA	-2.06811	-1.95145	-2.05487	-2.02635	-2.04716	-2.01745	-2.04173	-2.03934	-2.05265	-2.0523
69380	1700013G24Rik	ENSMUSG00000041399	NA	NA	NA	NA	NA	NA	NA	NA	NA	NA	NA	NA	NA	NA	NA	0	0	0	0	0	0	0	0	0	0
75514	1700013H16Rik	ENSMUSG00000054727	NA	NA	NA	0.715035	0.83965	NA	0.623446	0.859961	NA	0.767352	0.828094	NA	NA	NA	NA	-2.26868	-2.26933	-2.23844	-2.2599	-2.23297	-2.25359	-2.22911	-2.24827	-2.25771	-2.25746
381716	1700015F17Rik	ENSMUSG00000079666	-0.0054032	0.998779	NA	-0.00629435	0.998579	NA	NA	NA	NA	NA	NA	NA	-0.735979	0.83502	NA	-2.10787	-2.10873	-2.09553	-2.09634	-2.11574	-2.11545	-2.11068	-2.10845	-2.12086	-2.09312
100503036	1700015G11Rik	ENSMUSG00000094445	NA	NA	NA	NA	NA	NA	NA	NA	NA	NA	NA	NA	NA	NA	NA	0	0	0	0	0	0	0	0	0	0
69428	1700016C15Rik	ENSMUSG00000015962	1.6256	0.618457	NA	1.30482	0.710137	NA	-0.0798533	0.981953	NA	-1.43025	0.6783	NA	NA	NA	NA	-1.74922	-1.88273	-1.77342	-1.86282	-1.84996	-1.80544	-1.79778	-1.75015	-1.85819	-1.85766
76413	1700016D06Rik	ENSMUSG00000031509	0.734173	0.835418	NA	0.0086941	0.998035	NA	-0.819222	0.816674	NA	0.0517558	0.982419	NA	NA	NA	NA	-1.9051	-1.9507	-1.88518	-1.88648	-1.87358	-1.8731	-1.8654	-1.81759	-1.92606	-1.92553
71867	1700016G22Rik	NA	1.01491	0.514777	NA	-0.2604	0.768369	NA	-1.0571	0.464973	NA	-1.0158	0.38914	NA	1.8185	0.256707	NA	0.606232	0.453608	1.11891	1.24408	0.619793	0.748808	0.64369	1.04813	0.763894	0.459461
74218	1700016H13Rik	ENSMUSG00000029320	NA	NA	NA	NA	NA	NA	0.623446	0.859961	NA	-0.675316	0.848446	NA	1.27713	0.716193	NA	-2.2039	-2.20473	-2.19193	-2.19271	-2.1584	-2.18468	-2.18005	-2.15133	-2.13679	-2.1896
74230	1700016K19Rik	ENSMUSG00000053783	NA	NA	NA	NA	NA	NA	NA	NA	NA	NA	NA	NA	NA	NA	NA	0	0	0	0	0	0	0	0	0	0
69412	1700016L04Rik	NA	0.734173	0.835418	NA	NA	NA	NA	NA	NA	NA	NA	NA	NA	NA	NA	NA	-2.39355	-2.3997	-2.39683	-2.39701	-2.39527	-2.3952	-2.39416	-2.39368	-2.39638	-2.39631
72208	1700016L21Rik	NA	NA	NA	NA	NA	NA	NA	NA	NA	NA	NA	NA	NA	NA	NA	NA	0	0	0	0	0	0	0	0	0	0
69413	1700016P04Rik	NA	NA	NA	NA	NA	NA	NA	NA	NA	NA	NA	NA	NA	NA	NA	NA	0	0	0	0	0	0	0	0	0	0
74211	1700017B05Rik	ENSMUSG00000032300	-0.139691	0.0760149	0.28623	-0.247397	0.0695675	0.167963	0.32319	0.0704549	0.276844	0.13861	0.140521	0.370291	-0.0127677	0.901022	0.951055	10.2526	10.3416	10.0588	10.2037	8.92155	8.33699	9.76495	10.1188	10.7136	10.7151
69369	1700017D01Rik	ENSMUSG00000024729	-1.24885	0.722196	NA	NA	NA	NA	-0.234798	0.923275	NA	1.19421	0.524993	NA	1.29719	0.610713	NA	-1.42769	-1.31334	-1.39932	-1.40132	-1.24589	-1.19546	-1.09771	-1.22785	-1.19674	-1.32555
100040882	1700017G19Rik	NA	0.549185	0.700826	NA	0.469732	0.688194	NA	1.11014	0.628156	NA	1.55655	0.494391	NA	-1.78211	0.189956	NA	0.0795224	-0.0213822	0.160823	0.0525765	-0.0395031	-0.190283	0.0211309	-0.168308	-0.0765842	0.340622
75508	1700017J07Rik	NA	0.734173	0.835418	NA	NA	NA	NA	NA	NA	NA	NA	NA	NA	NA	NA	NA	-2.39384	-2.39921	-2.3967	-2.39685	-2.39533	-2.39528	-2.39437	-2.39395	-2.39631	-2.39624
66605	1700017N19Rik	ENSMUSG00000056912	NA	NA	NA	NA	NA	NA	NA	NA	NA	NA	NA	NA	NA	NA	NA	0	0	0	0	0	0	0	0	0	0
71307	1700018A04Rik	NA	NA	NA	NA	NA	NA	NA	NA	NA	NA	NA	NA	NA	NA	NA	NA	0	0	0	0	0	0	0	0	0	0
69391	1700018A14Rik	NA	1.00813	0.493192	NA	0.792929	0.608885	NA	0.449521	0.687928	NA	-1.88072	0.535083	NA	-0.929458	0.518323	NA	0.174522	0.00648019	0.264638	0.102925	0.290026	0.385873	0.106134	0.107718	0.122245	0.263034
76405	1700018B08Rik	ENSMUSG00000031809	0.466109	0.814058	NA	-0.727633	0.836864	NA	-0.126545	0.971397	NA	NA	NA	NA	NA	NA	NA	-1.71277	-1.79625	-1.85865	-1.81877	-1.80678	-1.80633	-1.84028	-1.83694	-1.85555	-1.85505
66332	1700018B24Rik	NA	NA	NA	NA	NA	NA	NA	NA	NA	NA	NA	NA	NA	NA	NA	NA	0	0	0	0	0	0	0	0	0	0
69396	1700018F24Rik	ENSMUSG00000029620	NA	NA	NA	NA	NA	NA	NA	NA	NA	NA	NA	NA	NA	NA	NA	0	0	0	0	0	0	0	0	0	0
69388	1700018G05Rik	NA	NA	NA	NA	NA	NA	NA	NA	NA	NA	NA	NA	NA	NA	NA	NA	0	0	0	0	0	0	0	0	0	0
67329	1700018L02Rik	NA	-0.523737	0.274398	0.549629	-1.13945	0.206675	NA	0.19103	0.80249	NA	-0.29135	0.748664	NA	0.00659466	0.994333	NA	2.41476	2.70111	1.74528	2.11986	2.21915	2.14269	2.04244	2.16218	1.89607	1.87481
69397	1700019A02Rik	ENSMUSG00000060715	-0.495845	0.859726	NA	0.623972	0.64154	NA	-0.0978839	0.977902	NA	-0.675316	0.848446	NA	-1.27239	0.6217	NA	-1.21134	-1.15082	-0.87041	-0.989794	-1.16033	-1.15959	-1.21696	-1.14186	-1.17472	-1.04966
67080	1700019D03Rik	ENSMUSG00000043629	-0.708495	0.841097	NA	-0.217503	0.932498	NA	-0.819222	0.816674	NA	0.767352	0.828094	NA	NA	NA	NA	-2.00884	-1.9725	-1.9169	-1.91801	-1.9821	-1.94418	-1.93765	-1.97212	-1.98911	-1.98866
69405	1700019E08Rik	ENSMUSG00000086202	1.9826	0.475443	NA	1.28019	0.715472	NA	-1.14389	0.424489	NA	-1.43457	0.448838	NA	-1.00231	0.470122	NA	-0.394154	-0.590917	-0.419744	-0.566051	-0.288247	-0.0142626	-0.373344	-0.139971	-0.275072	-0.0455794
72249	1700019G24Rik	NA	NA	NA	NA	NA	NA	NA	NA	NA	NA	NA	NA	NA	NA	NA	NA	0	0	0	0	0	0	0	0	0	0
69423	1700019M22Rik	NA	NA	NA	NA	NA	NA	NA	NA	NA	NA	NA	NA	NA	NA	NA	NA	0	0	0	0	0	0	0	0	0	0
67507	1700019N19Rik	ENSMUSG00000026931	NA	NA	NA	NA	NA	NA	NA	NA	NA	NA	NA	NA	NA	NA	NA	0	0	0	0	0	0	0	0	0	0
75546	1700019P21Rik	NA	NA	NA	NA	NA	NA	NA	NA	NA	NA	NA	NA	NA	NA	NA	NA	0	0	0	0	0	0	0	0	0	0
75656	1700020A23Rik	ENSMUSG00000027409	-0.882749	0.50657	NA	2.76228	0.0140352	NA	-0.639147	0.746293	NA	-1.00338	0.441474	NA	0.744495	0.410103	NA	0.511515	0.676094	1.29002	0.49317	0.543412	0.548893	0.56969	0.928067	1.1254	0.866489
75555	1700020D05Rik	ENSMUSG00000100937	0.215187	0.614077	0.81195	0.523882	0.484437	NA	0.539494	0.316622	NA	0.489983	0.141905	0.372496	0.498942	0.139935	0.318551	4.21539	4.00039	3.11522	2.95946	3.95163	3.40954	4.43529	4.41818	4.55887	4.27024
75630	1700020G17Rik	NA	NA	NA	NA	NA	NA	NA	NA	NA	NA	NA	NA	NA	NA	NA	NA	0	0	0	0	0	0	0	0	0	0
66602	1700020I14Rik	NA	0.141774	0.118115	0.360591	0.0040719	0.970181	0.981729	0.0764807	0.505848	0.739514	0.233598	0.0261416	0.119736	0.257736	0.00652301	0.0387994	8.84121	8.74299	8.75294	8.73292	8.94798	8.80149	9.2236	9.17245	9.21542	9.03842
66330	1700020L24Rik	ENSMUSG00000035085	-0.438912	0.378182	NA	-1.0158	0.0177181	0.074457	0.0466203	0.886794	0.951614	-0.153264	0.641898	0.834732	-0.512237	0.25885	0.467232	3.33368	3.52634	3.50748	4.01675	4.56008	4.47565	4.45337	4.62308	3.81569	4.13848
76402	1700020M21Rik	NA	NA	NA	NA	NA	NA	NA	NA	NA	NA	NA	NA	NA	NA	NA	NA	0	0	0	0	0	0	0	0	0	0
67692	1700020N01Rik	NA	-0.562872	0.677122	NA	-0.956956	0.521974	NA	-2.82883	0.300742	NA	-1.24849	0.722323	NA	1.83719	0.23189	NA	-0.329461	-0.22997	-0.388688	-0.2029	-0.576226	-0.249916	-0.566704	-0.415112	-0.0880453	-0.441482
75509	1700020N15Rik	ENSMUSG00000059690	NA	NA	NA	NA	NA	NA	NA	NA	NA	NA	NA	NA	NA	NA	NA	0	0	0	0	0	0	0	0	0	0
67086	1700020N18Rik	NA	NA	NA	NA	NA	NA	NA	NA	NA	NA	NA	NA	NA	NA	NA	NA	0	0	0	0	0	0	0	0	0	0
76924	1700021A07Rik	NA	0.734173	0.835418	NA	NA	NA	NA	NA	NA	NA	NA	NA	NA	NA	NA	NA	-2.39384	-2.39921	-2.3967	-2.39685	-2.39533	-2.39528	-2.39437	-2.39395	-2.39631	-2.39624
67851	1700021F05Rik	ENSMUSG00000019797	-0.0286846	0.839633	0.930137	-0.349964	0.0874402	0.195161	-0.0985043	0.547777	0.765794	0.0723449	0.564313	0.78433	-0.163233	0.243819	0.449691	8.67416	8.67806	8.44762	8.64069	8.52918	8.51417	8.67375	8.71474	8.82539	8.94123
72221	1700021F07Rik	ENSMUSG00000027518	NA	NA	NA	NA	NA	NA	NA	NA	NA	NA	NA	NA	NA	NA	NA	0	0	0	0	0	0	0	0	0	0
69409	1700021N21Rik	NA	0.660544	0.810815	NA	NA	NA	NA	NA	NA	NA	NA	NA	NA	NA	NA	NA	-2.23279	-2.2492	-2.25745	-2.25792	-2.25328	-2.25311	-2.25034	-2.24904	-2.25625	-2.25606
75521	1700021P04Rik	NA	NA	NA	NA	NA	NA	NA	NA	NA	NA	NA	NA	NA	NA	NA	NA	0	0	0	0	0	0	0	0	0	0
72252	1700022A21Rik	NA	NA	NA	NA	NA	NA	NA	NA	NA	NA	NA	NA	NA	NA	NA	NA	0	0	0	0	0	0	0	0	0	0
71120	1700022A22Rik	NA	NA	NA	NA	NA	NA	NA	NA	NA	NA	NA	NA	NA	NA	NA	NA	0	0	0	0	0	0	0	0	0	0
75636	1700022E09Rik	NA	NA	NA	NA	NA	NA	NA	1.33942	0.704438	NA	2.01526	0.495349	NA	0.706689	0.841496	NA	-2.077	-2.07816	-2.06019	-2.06129	-1.90114	-2.05	-2.00619	-2.04048	-2.02006	-2.05692
69420	1700022H16Rik	NA	NA	NA	NA	NA	NA	NA	NA	NA	NA	NA	NA	NA	NA	NA	NA	0	0	0	0	0	0	0	0	0	0
67317	1700022I11Rik	ENSMUSG00000028451	-1.27044	0.717505	NA	0.00633634	0.997731	NA	-0.120645	0.962029	NA	-0.183115	0.912388	NA	2.92927	0.180871	NA	-0.97772	-0.844142	-0.750416	-0.778666	-0.786463	-0.798872	-0.643794	-0.559065	-0.555561	-0.953553
69431	1700022N22Rik	NA	-0.496921	0.328749	0.601544	-0.269764	0.61938	NA	-2.25747	0.0659491	NA	-0.438131	0.703863	NA	0.712298	0.346982	NA	2.42895	2.68892	2.5598	2.64476	1.69143	2.13398	1.80464	2.04872	2.34389	2.04294
73257	1700023C21Rik	NA	NA	NA	NA	NA	NA	NA	NA	NA	NA	NA	NA	NA	NA	NA	NA	0	0	0	0	0	0	0	0	0	0
69433	1700023F02Rik	NA	NA	NA	NA	NA	NA	NA	-0.819222	0.816674	NA	NA	NA	NA	NA	NA	NA	-2.40081	-2.40107	-2.39719	-2.39743	-2.39508	-2.38694	-2.39359	-2.39294	-2.39658	-2.39648
69441	1700023F06Rik	ENSMUSG00000020940	-0.395598	0.769557	NA	1.95659	0.565941	NA	-0.0900212	0.969111	NA	NA	NA	NA	-1.359	0.698509	NA	-1.01084	-0.919206	-1.07776	-1.26992	-1.18143	-1.11219	-1.169	-1.23171	-1.26273	-1.13107
100503856	1700024B05Rik	NA	NA	NA	NA	NA	NA	NA	NA	NA	NA	NA	NA	NA	NA	NA	NA	0	0	0	0	0	0	0	0	0	0
69393	1700024B18Rik	NA	NA	NA	NA	0.715035	0.83965	NA	NA	NA	NA	NA	NA	NA	NA	NA	NA	-2.39982	-2.40003	-2.39046	-2.39711	-2.39522	-2.39515	-2.39403	-2.3935	-2.39643	-2.39635
73270	1700024F13Rik	NA	0.652745	0.782199	NA	NA	NA	NA	NA	NA	NA	NA	NA	NA	NA	NA	NA	-2.05898	-2.08416	-2.12122	-2.12194	-2.11482	-2.11455	-2.11031	-2.10832	-2.11938	-2.11908
100039768	1700024F20Rik	NA	-0.0791683	0.671312	0.844241	-0.669493	0.0113631	0.0586721	-0.393203	0.252686	0.527042	-0.270494	0.583852	0.798512	0.277062	0.438357	0.643492	5.9026	5.93915	4.93476	5.32914	4.69121	5.02029	4.33618	4.36588	4.70364	4.55058
67085	1700024G13Rik	ENSMUSG00000072473	NA	NA	NA	NA	NA	NA	NA	NA	NA	NA	NA	NA	NA	NA	NA	0	0	0	0	0	0	0	0	0	0
69382	1700024P04Rik	ENSMUSG00000045022	NA	NA	NA	NA	NA	NA	NA	NA	NA	NA	NA	NA	NA	NA	NA	0	0	0	0	0	0	0	0	0	0
76409	1700025B11Rik	NA	NA	NA	NA	NA	NA	NA	NA	NA	NA	NA	NA	NA	NA	NA	NA	0	0	0	0	0	0	0	0	0	0
72211	1700025C18Rik	NA	NA	NA	NA	-1.17528	0.647052	NA	-0.418995	0.857146	NA	-0.675316	0.848446	NA	NA	NA	NA	-1.82172	-1.82326	-1.75012	-1.65285	-1.78654	-1.63791	-1.67868	-1.72404	-1.79576	-1.79516
69416	1700025F22Rik	ENSMUSG00000024728	NA	NA	NA	NA	NA	NA	NA	NA	NA	0.442359	0.804165	NA	-1.43746	0.683921	NA	-1.89056	-1.89214	-1.8678	-1.8693	-1.80403	-1.85401	-1.69366	-1.68956	-1.86399	-1.76234
67081	1700025F24Rik	ENSMUSG00000100558	NA	NA	NA	NA	NA	NA	NA	NA	NA	NA	NA	NA	NA	NA	NA	0	0	0	0	0	0	0	0	0	0
69399	1700025G04Rik	ENSMUSG00000032666	0.0857266	0.254546	0.52973	0.0904205	0.301553	0.450816	0.058563	0.632096	0.816123	0.371834	0.0683653	0.229589	0.422167	0.0116	0.0580329	9.51956	9.45139	9.72027	9.63513	8.58242	8.94482	7.77921	7.19493	7.68453	7.45199
75531	1700025H01Rik	NA	NA	NA	NA	NA	NA	NA	NA	NA	NA	NA	NA	NA	NA	NA	NA	0	0	0	0	0	0	0	0	0	0
69418	1700025K24Rik	NA	NA	NA	NA	NA	NA	NA	NA	NA	NA	NA	NA	NA	NA	NA	NA	0	0	0	0	0	0	0	0	0	0
72276	1700025M24Rik	ENSMUSG00000100175	-0.708495	0.841097	NA	NA	NA	NA	NA	NA	NA	NA	NA	NA	NA	NA	NA	-2.39922	-2.3939	-2.39675	-2.39691	-2.39531	-2.39525	-2.39429	-2.39385	-2.39633	-2.39627
69986	1700025N23Rik	NA	0.11013	0.813573	0.918981	0.424942	0.318467	0.467949	-0.174963	0.625734	0.811681	-0.273105	0.415497	0.680843	0.0550206	0.880294	0.941564	3.6683	3.60614	3.97088	3.74269	4.65799	4.91082	4.89604	4.95552	4.29001	4.25399
70371	1700026D11Rik	NA	0.734173	0.835418	NA	NA	NA	NA	NA	NA	NA	NA	NA	NA	NA	NA	NA	-2.39384	-2.39921	-2.3967	-2.39685	-2.39533	-2.39528	-2.39437	-2.39395	-2.39631	-2.39624
69419	1700026F02Rik	NA	NA	NA	NA	NA	NA	NA	NA	NA	NA	NA	NA	NA	NA	NA	NA	0	0	0	0	0	0	0	0	0	0
73255	1700026J12Rik	NA	NA	NA	NA	NA	NA	NA	NA	NA	NA	NA	NA	NA	NA	NA	NA	0	0	0	0	0	0	0	0	0	0
69449	1700027A15Rik	NA	NA	NA	NA	NA	NA	NA	NA	NA	NA	NA	NA	NA	NA	NA	NA	0	0	0	0	0	0	0	0	0	0
69999	1700027F09Rik	NA	NA	NA	NA	0.0086941	0.998035	NA	-0.819222	0.816674	NA	NA	NA	NA	1.65593	0.439513	NA	-1.94481	-1.94608	-1.88562	-1.88682	-1.91572	-1.87448	-1.90818	-1.90487	-1.76012	-1.88204
72274	1700027H10Rik	NA	NA	NA	NA	NA	NA	NA	NA	NA	NA	NA	NA	NA	NA	NA	NA	0	0	0	0	0	0	0	0	0	0
75567	1700027I24Rik	NA	NA	NA	NA	NA	NA	NA	NA	NA	NA	NA	NA	NA	NA	NA	NA	0	0	0	0	0	0	0	0	0	0
69443	1700027J07Rik	NA	NA	NA	NA	NA	NA	NA	NA	NA	NA	NA	NA	NA	NA	NA	NA	0	0	0	0	0	0	0	0	0	0
70001	1700028B04Rik	NA	NA	NA	NA	-0.727633	0.836864	NA	NA	NA	NA	NA	NA	NA	NA	NA	NA	-2.39988	-2.40008	-2.39693	-2.39058	-2.39521	-2.39514	-2.394	-2.39347	-2.39644	-2.39636
75569	1700028D13Rik	NA	NA	NA	NA	NA	NA	NA	NA	NA	NA	NA	NA	NA	NA	NA	NA	0	0	0	0	0	0	0	0	0	0
625175	1700028E10Rik	NA	-0.0955127	0.844193	0.93173	0.387137	0.58325	NA	0.17504	0.814676	NA	0.746532	0.349641	NA	0.445782	0.494894	NA	2.75227	2.77358	2.37443	2.22338	2.42527	2.29384	2.49435	2.26134	2.54202	2.35166
70003	1700028I16Rik	NA	-0.242606	0.838622	NA	0.164737	0.888131	NA	-1.35672	0.461324	NA	1.95569	0.300408	NA	-0.281152	0.818289	NA	0.314725	0.387572	0.411313	0.365763	0.145066	0.330208	0.412851	0.0994199	0.421901	0.492996
70004	1700028J19Rik	NA	0.105671	0.801234	0.912668	0.0427717	0.911941	0.946091	0.72497	0.139403	0.386648	0.00371542	0.99483	0.997914	-0.929633	0.186573	NA	3.52453	3.47252	3.78186	3.74054	3.6971	3.31891	3.33039	3.33955	2.75691	3.14956
76421	1700028K03Rik	ENSMUSG00000089798	0.0996253	0.776896	0.899054	0.441675	0.627793	NA	0.826838	0.0611591	0.257952	0.155192	0.724882	0.881151	0.249225	0.557415	0.739633	4.17846	4.08536	2.82756	2.69304	4.06135	3.6316	3.95286	3.83576	3.82781	3.66331
69460	1700028M03Rik	NA	NA	NA	NA	NA	NA	NA	NA	NA	NA	NA	NA	NA	NA	NA	NA	0	0	0	0	0	0	0	0	0	0
67483	1700028P14Rik	ENSMUSG00000033053	NA	NA	NA	NA	NA	NA	NA	NA	NA	NA	NA	NA	NA	NA	NA	0	0	0	0	0	0	0	0	0	0
75655	1700028P15Rik	NA	NA	NA	NA	NA	NA	NA	NA	NA	NA	NA	NA	NA	NA	NA	NA	0	0	0	0	0	0	0	0	0	0
69495	1700029B22Rik	NA	NA	NA	NA	NA	NA	NA	NA	NA	NA	NA	NA	NA	NA	NA	NA	0	0	0	0	0	0	0	0	0	0
72250	1700029E06Rik	NA	0.734173	0.835418	NA	-0.0259254	0.994135	NA	NA	NA	NA	NA	NA	NA	NA	NA	NA	-2.24823	-2.2674	-2.23986	-2.24041	-2.25357	-2.25337	-2.25013	-2.24863	-2.25704	-2.25682
66479	1700029F12Rik	ENSMUSG00000052075	NA	NA	NA	NA	NA	NA	NA	NA	NA	NA	NA	NA	NA	NA	NA	0	0	0	0	0	0	0	0	0	0
66501	1700029H14Rik	ENSMUSG00000031452	-0.469117	0.5133	NA	-0.383954	0.497397	NA	-1.11167	0.515783	NA	0.366148	0.857411	NA	-0.326997	0.784351	NA	1.55368	1.76256	2.06306	2.31198	1.13385	1.20488	1.01233	1.0389	1.31819	1.33146
75641	1700029I15Rik	ENSMUSG00000044916	-0.0759587	0.872974	0.944515	-0.788585	0.145142	0.273631	-0.619855	0.299341	NA	0.0625756	0.923408	NA	-0.406734	0.418312	0.626784	3.14572	3.17898	3.02478	3.41267	3.01952	3.20568	2.99733	3.02636	3.22216	3.44564
72264	1700029J03Rik	NA	NA	NA	NA	NA	NA	NA	NA	NA	NA	NA	NA	NA	NA	NA	NA	0	0	0	0	0	0	0	0	0	0
69479	1700029J07Rik	ENSMUSG00000071103	0.439367	0.553482	NA	-0.618789	0.486139	NA	-0.34479	0.783081	NA	0.0472748	0.976673	NA	0.719206	0.403338	NA	1.66634	1.48816	1.26612	1.50776	1.07748	1.1928	1.1333	1.07494	1.58608	1.30795
69476	1700029M03Rik	NA	NA	NA	NA	NA	NA	NA	NA	NA	NA	NA	NA	NA	NA	NA	NA	0	0	0	0	0	0	0	0	0	0
73937	1700029M20Rik	NA	NA	NA	NA	NA	NA	NA	NA	NA	NA	NA	NA	NA	NA	NA	NA	0	0	0	0	0	0	0	0	0	0
69491	1700029N11Rik	NA	-0.708495	0.841097	NA	-0.727633	0.836864	NA	0.623446	0.859961	NA	NA	NA	NA	NA	NA	NA	-2.26671	-2.24883	-2.2584	-2.24048	-2.23509	-2.25336	-2.25014	-2.24865	-2.257	-2.25678
66346	1700029P11Rik	ENSMUSG00000061633	-0.708495	0.841097	NA	NA	NA	NA	NA	NA	NA	NA	NA	NA	-0.735979	0.83502	NA	-2.33266	-2.3206	-2.32705	-2.32742	-2.32379	-2.32366	-2.32149	-2.32048	-2.32611	-2.31352
74179	1700030A11Rik	NA	NA	NA	NA	NA	NA	NA	NA	NA	NA	NA	NA	NA	NA	NA	NA	0	0	0	0	0	0	0	0	0	0
69513	1700030C10Rik	NA	-0.546898	0.470305	NA	-0.636535	0.413376	NA	-0.825369	0.543414	NA	-1.1544	0.325526	NA	0.287836	0.813738	NA	1.75016	1.97917	1.60584	1.86501	1.21493	1.3993	1.32413	1.62592	1.35577	1.29017
72246	1700030C12Rik	NA	-0.708495	0.841097	NA	0.715035	0.83965	NA	NA	NA	NA	0.767352	0.828094	NA	-0.065323	0.985227	NA	-2.13817	-2.10888	-2.09431	-2.12544	-2.11662	-2.11629	-2.08079	-2.10857	-2.09203	-2.09166
72263	1700030F04Rik	NA	NA	NA	NA	NA	NA	NA	NA	NA	NA	NA	NA	NA	NA	NA	NA	0	0	0	0	0	0	0	0	0	0
69528	1700030J22Rik	ENSMUSG00000031847	-0.145499	0.608135	0.807985	0.0160712	0.965223	0.978929	0.112542	0.888303	NA	-0.070195	0.916927	0.968943	-0.280335	0.285489	0.496216	4.34437	4.43249	3.99173	3.96709	3.35748	3.08703	3.46868	3.73142	4.77855	4.96312
72254	1700030K09Rik	ENSMUSG00000052794	0.017129	0.882674	0.947538	0.203278	0.196689	0.334658	0.0206982	0.903511	0.958579	-0.141347	0.432133	0.693873	-0.150217	0.309106	0.520095	7.34679	7.32797	6.91626	6.77631	6.90206	6.82068	6.86555	7.0321	7.1295	7.22652
70055	1700030L20Rik	ENSMUSG00000099508	NA	NA	NA	NA	NA	NA	NA	NA	NA	NA	NA	NA	NA	NA	NA	0	0	0	0	0	0	0	0	0	0
72259	1700030M09Rik	NA	-0.708495	0.841097	NA	0.715035	0.83965	NA	NA	NA	NA	NA	NA	NA	NA	NA	NA	-2.33221	-2.32076	-2.31506	-2.32724	-2.32378	-2.32366	-2.3216	-2.32064	-2.32599	-2.32585
70011	1700030N03Rik	NA	NA	NA	NA	NA	NA	NA	NA	NA	NA	NA	NA	NA	NA	NA	NA	0	0	0	0	0	0	0	0	0	0
72286	1700030O20Rik	NA	0.734173	0.835418	NA	NA	NA	NA	NA	NA	NA	NA	NA	NA	NA	NA	NA	-2.39355	-2.3997	-2.39683	-2.39701	-2.39527	-2.3952	-2.39416	-2.39368	-2.39638	-2.39631
73286	1700031A10Rik	NA	0.734173	0.835418	NA	NA	NA	NA	NA	NA	NA	NA	NA	NA	NA	NA	NA	-2.39355	-2.3997	-2.39683	-2.39701	-2.39527	-2.3952	-2.39416	-2.39368	-2.39638	-2.39631
73300	1700031F05Rik	ENSMUSG00000032894	NA	NA	NA	NA	NA	NA	0.623446	0.859961	NA	NA	NA	NA	NA	NA	NA	-2.40099	-2.40125	-2.39724	-2.39748	-2.38673	-2.39496	-2.39351	-2.39284	-2.39661	-2.39651
67327	1700031L13Rik	NA	NA	NA	NA	NA	NA	NA	NA	NA	NA	NA	NA	NA	NA	NA	NA	0	0	0	0	0	0	0	0	0	0
73302	1700031M16Rik	NA	NA	NA	NA	NA	NA	NA	NA	NA	NA	NA	NA	NA	NA	NA	NA	0	0	0	0	0	0	0	0	0	0
73278	1700031P21Rik	NA	NA	NA	NA	NA	NA	NA	NA	NA	NA	NA	NA	NA	NA	NA	NA	0	0	0	0	0	0	0	0	0	0
78414	1700034E13Rik	ENSMUSG00000024532	NA	NA	NA	NA	NA	NA	NA	NA	NA	NA	NA	NA	NA	NA	NA	0	0	0	0	0	0	0	0	0	0
67325	1700034G24Rik	NA	NA	NA	NA	NA	NA	NA	NA	NA	NA	NA	NA	NA	NA	NA	NA	0	0	0	0	0	0	0	0	0	0
98736	1700034H15Rik	NA	0.601167	0.17519	0.440789	0.129061	0.817028	NA	0.0879022	0.888535	NA	-0.975256	0.0267221	0.121489	0.57974	0.141848	0.320971	3.63811	3.30249	3.2462	3.14587	3.4447	3.18072	3.29611	4.07942	4.06475	3.70639
73297	1700034I23Rik	NA	1.24575	0.408736	NA	-0.00629435	0.998579	NA	NA	NA	NA	-0.684673	0.802676	NA	1.22803	0.62855	NA	-0.967242	-1.18187	-1.26219	-1.26391	-1.2437	-1.3088	-1.29734	-1.1604	-1.12925	-1.25589
73304	1700034J04Rik	NA	NA	NA	NA	NA	NA	NA	NA	NA	NA	NA	NA	NA	NA	NA	NA	0	0	0	0	0	0	0	0	0	0
73344	1700034J05Rik	ENSMUSG00000040163	NA	NA	NA	0.42929	0.749845	NA	NA	NA	NA	NA	NA	NA	NA	NA	NA	-1.71596	-1.71758	-1.34798	-1.43454	-1.67896	-1.6784	-1.66936	-1.66515	-1.68865	-1.68802
78349	1700034K08Rik	NA	NA	NA	NA	NA	NA	NA	NA	NA	NA	NA	NA	NA	NA	NA	NA	0	0	0	0	0	0	0	0	0	0
73331	1700034P13Rik	NA	0.0217447	0.980626	NA	1.10443	0.24767	NA	-0.855357	0.358584	NA	-0.0229832	0.982063	NA	0.247161	0.731219	NA	1.42605	1.41661	1.58721	1.26383	1.60096	1.72912	1.43904	1.5832	1.88017	1.76241
100040447	1700036A12Rik	NA	NA	NA	NA	NA	NA	NA	NA	NA	NA	NA	NA	NA	NA	NA	NA	0	0	0	0	0	0	0	0	0	0
73283	1700036G14Rik	NA	NA	NA	NA	NA	NA	NA	NA	NA	NA	NA	NA	NA	NA	NA	NA	0	0	0	0	0	0	0	0	0	0
73261	1700037C18Rik	ENSMUSG00000005983	-0.208009	0.304905	0.579995	-0.43428	0.0979606	0.210578	-0.454523	0.14458	0.394638	-0.279539	0.26094	0.533009	-0.413958	0.0872444	0.233735	5.90249	6.02296	5.70541	5.96348	5.59304	5.76904	5.58119	5.85979	5.69857	5.95703
67326	1700037H04Rik	ENSMUSG00000027327	-0.336692	0.00517513	0.0649887	-0.55812	0.00138274	0.0185305	-0.460736	0.00201725	0.0356568	-0.0686667	0.504601	0.74461	-0.330392	0.00304396	0.0220104	10.0919	10.3091	9.91555	10.2533	9.83108	10.1492	9.82957	9.86147	9.85268	10.07
73322	1700039E22Rik	NA	NA	NA	NA	NA	NA	NA	NA	NA	NA	NA	NA	NA	NA	NA	NA	0	0	0	0	0	0	0	0	0	0
67518	1700039M10Rik	NA	0.539295	0.864551	NA	1.3095	0.709184	NA	1.55116	0.622761	NA	-0.51954	0.795759	NA	0.621959	0.825244	NA	-1.35034	-1.40883	-1.31212	-1.44256	-1.22608	-1.42266	-1.27968	-1.20858	-1.30412	-1.36909
76602	1700040D17Rik	NA	-1.00552	0.165002	NA	-1.84322	0.156658	NA	0.367461	0.72741	NA	-1.1575	0.531933	NA	0.635529	0.531472	NA	1.21676	1.6851	0.786076	1.19033	1.09168	1.13063	0.900168	0.999124	1.30077	1.10059
73329	1700040F15Rik	NA	NA	NA	NA	NA	NA	NA	NA	NA	NA	NA	NA	NA	NA	NA	NA	0	0	0	0	0	0	0	0	0	0
73334	1700040F17Rik	NA	NA	NA	NA	NA	NA	NA	NA	NA	NA	NA	NA	NA	NA	NA	NA	0	0	0	0	0	0	0	0	0	0
67319	1700041C23Rik	NA	NA	NA	NA	NA	NA	NA	NA	NA	NA	NA	NA	NA	NA	NA	NA	0	0	0	0	0	0	0	0	0	0
76601	1700041M19Rik	NA	NA	NA	NA	NA	NA	NA	NA	NA	NA	NA	NA	NA	NA	NA	NA	0	0	0	0	0	0	0	0	0	0
67323	1700042G07Rik	ENSMUSG00000078593	NA	NA	NA	NA	NA	NA	NA	NA	NA	NA	NA	NA	NA	NA	NA	0	0	0	0	0	0	0	0	0	0
73349	1700042G15Rik	NA	0.734173	0.835418	NA	NA	NA	NA	NA	NA	NA	NA	NA	NA	NA	NA	NA	-2.39355	-2.3997	-2.39683	-2.39701	-2.39527	-2.3952	-2.39416	-2.39368	-2.39638	-2.39631
73321	1700042O10Rik	NA	0.736621	0.583435	NA	-0.876572	0.196883	NA	-0.815662	0.541594	NA	-0.511651	0.700104	NA	-0.867973	0.52843	NA	0.79204	0.630764	1.20258	1.62596	0.680639	0.9106	0.907107	0.998882	0.703936	0.936115
73306	1700044C05Rik	NA	NA	NA	NA	NA	NA	NA	NA	NA	NA	0.767352	0.828094	NA	NA	NA	NA	-2.40143	-2.40171	-2.39736	-2.39762	-2.39499	-2.39489	-2.38429	-2.39259	-2.39668	-2.39657
67321	1700044K03Rik	NA	NA	NA	NA	NA	NA	NA	NA	NA	NA	NA	NA	NA	NA	NA	NA	0	0	0	0	0	0	0	0	0	0
73348	1700045H11Rik	NA	NA	NA	NA	NA	NA	NA	NA	NA	NA	NA	NA	NA	NA	NA	NA	0	0	0	0	0	0	0	0	0	0
73350	1700045I11Rik	NA	NA	NA	NA	NA	NA	NA	NA	NA	NA	NA	NA	NA	NA	NA	NA	0	0	0	0	0	0	0	0	0	0
73307	1700046C09Rik	NA	NA	NA	NA	NA	NA	NA	NA	NA	NA	NA	NA	NA	NA	NA	NA	0	0	0	0	0	0	0	0	0	0
73339	1700047G03Rik	NA	-1.59887	0.610354	NA	-0.727633	0.836864	NA	-0.639147	0.746293	NA	0.215457	0.923889	NA	-0.389337	0.835875	NA	-1.29132	-1.10996	-1.26584	-1.19914	-1.10545	-1.03379	-1.09276	-1.08659	-1.05708	-1.0502
100101807	1700047I17Rik2	ENSMUSG00000094103	NA	NA	NA	NA	NA	NA	NA	NA	NA	NA	NA	NA	NA	NA	NA	0	0	0	0	0	0	0	0	0	0
73295	1700047L14Rik	NA	NA	NA	NA	NA	NA	NA	NA	NA	NA	NA	NA	NA	NA	NA	NA	0	0	0	0	0	0	0	0	0	0
67330	1700047M11Rik	NA	1.9633	0.547267	NA	0.715035	0.83965	NA	NA	NA	NA	NA	NA	NA	NA	NA	NA	-2.13783	-2.19848	-2.16883	-2.18943	-2.18359	-2.18338	-2.17989	-2.17827	-2.18733	-2.18709
100503166	1700048M11Rik	NA	-0.0351133	0.942049	0.973944	-0.80007	0.623636	NA	1.1194	0.225858	NA	-0.0443695	0.957353	NA	0.630567	0.304639	NA	2.55897	2.56796	1.50375	1.55642	1.9939	1.77262	2.30113	2.14446	2.57113	2.2453
69430	1700048O20Rik	NA	-0.277686	0.730705	NA	0.597037	0.7471	NA	-1.36209	0.272245	NA	-1.11241	0.490661	NA	0.771631	0.651142	NA	0.844888	0.972182	0.463033	0.450125	0.406261	0.850234	0.6451	0.708448	0.594696	0.430131
100039727	1700049E15Rik	NA	NA	NA	NA	NA	NA	NA	NA	NA	NA	NA	NA	NA	NA	NA	NA	0	0	0	0	0	0	0	0	0	0
666214	1700049E17Rik1	ENSMUSG00000079271 /// ENSMUSG00000090440	NA	NA	NA	NA	NA	NA	NA	NA	NA	NA	NA	NA	NA	NA	NA	0	0	0	0	0	0	0	0	0	0
100041722	1700049E17Rik2	ENSMUSG00000079271 /// ENSMUSG00000090440	NA	NA	NA	NA	NA	NA	NA	NA	NA	NA	NA	NA	NA	NA	NA	0	0	0	0	0	0	0	0	0	0
73395	1700049E22Rik	NA	NA	NA	NA	NA	NA	NA	NA	NA	NA	0.767352	0.828094	NA	NA	NA	NA	-2.40128	-2.40155	-2.39732	-2.39758	-2.38622	-2.39492	-2.39339	-2.39267	-2.39665	-2.39655
108950	1700049L16Rik	NA	NA	NA	NA	NA	NA	NA	NA	NA	NA	NA	NA	NA	NA	NA	NA	0	0	0	0	0	0	0	0	0	0
73366	1700051A21Rik	NA	NA	NA	NA	NA	NA	NA	NA	NA	NA	NA	NA	NA	NA	NA	NA	0	0	0	0	0	0	0	0	0	0
67340	1700052I22Rik	NA	0.734173	0.835418	NA	0.715035	0.83965	NA	0.623446	0.859961	NA	NA	NA	NA	0.706689	0.841496	NA	-2.17757	-2.20177	-2.167	-2.19116	-2.16085	-2.18406	-2.17998	-2.17807	-2.16523	-2.18841
73431	1700052K11Rik	NA	-0.142306	0.441834	0.695399	-0.0570618	0.79903	0.86831	-0.0596865	0.729974	0.872631	0.0601527	0.757965	0.896303	-0.0263638	0.87759	0.939803	6.16055	6.24588	5.95176	5.96549	6.65779	6.66202	6.5281	6.52858	6.56991	6.58037
78457	1700054A03Rik	NA	NA	NA	NA	NA	NA	NA	NA	NA	NA	NA	NA	NA	NA	NA	NA	0	0	0	0	0	0	0	0	0	0
67336	1700054K19Rik	NA	NA	NA	NA	NA	NA	NA	NA	NA	NA	NA	NA	NA	NA	NA	NA	0	0	0	0	0	0	0	0	0	0
73358	1700054M17Rik	NA	0.54048	0.869742	NA	1.20319	0.582515	NA	NA	NA	NA	-0.675316	0.848446	NA	-0.01464	0.996694	NA	-1.72761	-1.77331	-1.66073	-1.7528	-1.78492	-1.78443	-1.77654	-1.72749	-1.74803	-1.74748
74272	1700054O19Rik	NA	0.00073335	0.999794	NA	NA	NA	NA	NA	NA	NA	0.767352	0.828094	NA	-0.01464	0.996694	NA	-1.93515	-1.93627	-1.99061	-1.99166	-1.98122	-1.98084	-1.93882	-1.9717	-1.95212	-1.95168
73397	1700055C04Rik	NA	NA	NA	NA	NA	NA	NA	NA	NA	NA	NA	NA	NA	NA	NA	NA	0	0	0	0	0	0	0	0	0	0
73405	1700055D18Rik	NA	-0.353636	0.395999	0.659882	0.272777	0.545127	NA	0.115619	0.758024	0.886507	-0.258305	0.488603	0.735436	0.194825	0.686441	0.827905	3.70803	3.86327	3.68707	3.54613	4.46113	4.33677	4.15883	4.42745	3.89592	3.79069
73363	1700056E22Rik	ENSMUSG00000044854	-0.404701	0.26438	0.539072	-0.173802	0.687003	0.788647	-0.69138	0.320972	NA	-0.258394	0.835656	NA	-0.851021	0.360786	NA	3.24584	3.49086	3.13104	3.2094	2.21014	2.72723	2.37395	2.2265	2.08532	2.34715
78459	1700057G04Rik	ENSMUSG00000074139	NA	NA	NA	NA	NA	NA	NA	NA	NA	NA	NA	NA	NA	NA	NA	0	0	0	0	0	0	0	0	0	0
78460	1700057H15Rik	NA	NA	NA	NA	NA	NA	NA	NA	NA	NA	0.767352	0.828094	NA	NA	NA	NA	-2.40103	-2.40129	-2.39725	-2.3975	-2.39505	-2.39496	-2.3851	-2.39281	-2.39661	-2.39651
73425	1700060C16Rik	NA	NA	NA	NA	NA	NA	NA	NA	NA	NA	NA	NA	NA	NA	NA	NA	0	0	0	0	0	0	0	0	0	0
73399	1700060C20Rik	NA	1.44737	0.682028	NA	-1.47722	0.447294	NA	-0.0978839	0.977902	NA	NA	NA	NA	NA	NA	NA	-1.6559	-1.75561	-1.63378	-1.48797	-1.67	-1.66947	-1.71001	-1.70603	-1.72826	-1.72766
67335	1700060O08Rik	NA	NA	NA	NA	NA	NA	NA	NA	NA	NA	NA	NA	NA	NA	NA	NA	0	0	0	0	0	0	0	0	0	0
100038395	1700061E17Rik	NA	NA	NA	NA	NA	NA	NA	0.623446	0.859961	NA	NA	NA	NA	NA	NA	NA	-2.40042	-2.40065	-2.39708	-2.3973	-2.38773	-2.39506	-2.39377	-2.39317	-2.39652	-2.39643
73438	1700061F12Rik	NA	NA	NA	NA	NA	NA	NA	NA	NA	NA	NA	NA	NA	NA	NA	NA	0	0	0	0	0	0	0	0	0	0
78625	1700061G19Rik	ENSMUSG00000024209	0.232886	0.446431	0.699089	0.51497	0.127801	0.250968	0.301141	0.502974	0.737425	0.0865687	0.887696	NA	-0.199348	0.709433	0.841122	4.25217	4.10369	4.27642	3.92929	3.8114	3.7046	3.50042	3.39949	3.41073	3.48901
433646	1700061I17Rik	NA	NA	NA	NA	NA	NA	NA	NA	NA	NA	NA	NA	NA	NA	NA	NA	0	0	0	0	0	0	0	0	0	0
73454	1700063A18Rik	NA	NA	NA	NA	NA	NA	NA	NA	NA	NA	NA	NA	NA	NA	NA	NA	0	0	0	0	0	0	0	0	0	0
78500	1700063D05Rik	NA	NA	NA	NA	-0.0158051	0.99643	NA	NA	NA	NA	NA	NA	NA	0.706689	0.841496	NA	-2.26706	-2.26765	-2.23967	-2.24023	-2.2536	-2.2534	-2.25011	-2.24858	-2.23825	-2.2569
74269	1700063H04Rik	NA	NA	NA	NA	NA	NA	NA	NA	NA	NA	NA	NA	NA	NA	NA	NA	0	0	0	0	0	0	0	0	0	0
76610	1700063K16Rik	NA	NA	NA	NA	NA	NA	NA	-0.819222	0.816674	NA	NA	NA	NA	NA	NA	NA	-2.40073	-2.40097	-2.39716	-2.3974	-2.39509	-2.3871	-2.39363	-2.39299	-2.39657	-2.39647
73452	1700063O14Rik	NA	NA	NA	NA	NA	NA	NA	NA	NA	NA	NA	NA	NA	NA	NA	NA	0	0	0	0	0	0	0	0	0	0
73400	1700064J06Rik	NA	NA	NA	NA	NA	NA	NA	NA	NA	NA	NA	NA	NA	NA	NA	NA	0	0	0	0	0	0	0	0	0	0
73457	1700064M15Rik	NA	1.18139	0.561722	NA	0.876788	0.625257	NA	-1.30562	0.565339	NA	0.767352	0.828094	NA	-0.735979	0.83502	NA	-1.13503	-1.25727	-1.09383	-1.21599	-1.26036	-1.12954	-1.24833	-1.30811	-1.33757	-1.27216
73410	1700065D16Rik	ENSMUSG00000096655	-0.81861	0.475732	NA	0.322068	0.528937	NA	-0.130506	0.828871	NA	0.323967	0.78171	NA	-0.31328	0.757824	NA	1.56425	1.7719	2.63051	2.45276	2.30659	2.73412	2.19536	1.7611	1.78863	1.89066
78462	1700065I16Rik	NA	NA	NA	NA	NA	NA	NA	NA	NA	NA	NA	NA	NA	NA	NA	NA	0	0	0	0	0	0	0	0	0	0
73409	1700065J11Rik	NA	NA	NA	NA	NA	NA	NA	NA	NA	NA	NA	NA	NA	NA	NA	NA	0	0	0	0	0	0	0	0	0	0
73455	1700065J18Rik	NA	NA	NA	NA	NA	NA	NA	NA	NA	NA	NA	NA	NA	NA	NA	NA	0	0	0	0	0	0	0	0	0	0
76609	1700065O20Rik	NA	NA	NA	NA	NA	NA	NA	NA	NA	NA	0.767352	0.828094	NA	NA	NA	NA	-2.40128	-2.40155	-2.39732	-2.39758	-2.38622	-2.39492	-2.39339	-2.39267	-2.39665	-2.39655
73426	1700066B17Rik	NA	NA	NA	NA	-0.727633	0.836864	NA	-0.819222	0.816674	NA	NA	NA	NA	NA	NA	NA	-2.33336	-2.33377	-2.32732	-2.3143	-2.3238	-2.31025	-2.32132	-2.32023	-2.3263	-2.32614
73449	1700066B19Rik	ENSMUSG00000073598	-0.10144	0.853957	NA	-0.174678	0.862769	NA	-0.740619	0.6544	NA	-0.863961	0.311021	NA	0.198781	0.751091	NA	2.19345	2.2706	1.55545	1.59965	1.55967	1.49587	1.58904	2.11351	2.2476	2.13535
78654	1700066C05Rik	NA	NA	NA	NA	NA	NA	NA	NA	NA	NA	NA	NA	NA	NA	NA	NA	0	0	0	0	0	0	0	0	0	0
73467	1700066M21Rik	ENSMUSG00000038323	0.10473	0.294981	0.569995	-0.038656	0.772622	0.85169	0.21612	0.210563	0.478761	0.0849287	0.588189	0.80159	-0.00897484	0.944627	0.97281	8.09512	8.01442	7.4524	7.45896	7.3192	7.15601	7.32905	7.31603	7.78067	7.78348
73471	1700066N21Rik	NA	NA	NA	NA	NA	NA	NA	NA	NA	NA	NA	NA	NA	NA	NA	NA	0	0	0	0	0	0	0	0	0	0
74916	1700066O22Rik	NA	NA	NA	NA	NA	NA	NA	NA	NA	NA	NA	NA	NA	NA	NA	NA	0	0	0	0	0	0	0	0	0	0
73475	1700067G17Rik	NA	NA	NA	NA	NA	NA	NA	NA	NA	NA	0.0460239	0.989272	NA	NA	NA	NA	-2.33613	-2.33666	-2.32836	-2.32887	-2.32383	-2.32365	-2.3034	-2.302	-2.32706	-2.32685
73453	1700067K01Rik	ENSMUSG00000046408	-0.00145922	0.996251	0.997429	-0.829061	0.181737	NA	0.490791	0.559396	NA	-0.188378	0.738232	0.8879	-0.244471	0.588947	0.76322	4.02706	4.01747	2.94148	3.33075	2.95196	2.68843	3.18541	3.37467	3.55452	3.68543
68224	1700067P10Rik	ENSMUSG00000021545 /// ENSMUSG00000115934	NA	NA	NA	NA	NA	NA	NA	NA	NA	NA	NA	NA	NA	NA	NA	0	0	0	0	0	0	0	0	0	0
381707	1700069L16Rik	NA	NA	NA	NA	NA	NA	NA	NA	NA	NA	NA	NA	NA	NA	NA	NA	0	0	0	0	0	0	0	0	0	0
73531	1700069P05Rik	NA	NA	NA	NA	NA	NA	NA	NA	NA	NA	NA	NA	NA	NA	NA	NA	0	0	0	0	0	0	0	0	0	0
237880	1700071K01Rik	ENSMUSG00000080980	NA	NA	NA	-0.727633	0.836864	NA	NA	NA	NA	0.0460237	0.989317	NA	0.706689	0.841496	NA	-2.20455	-2.2054	-2.19226	-2.1658	-2.18511	-2.18482	-2.1528	-2.15058	-2.16293	-2.18987
73504	1700071M16Rik	NA	1.05674	0.0354921	0.190118	1.89297	0.00187272	0.022034	2.16876	0.000364925	0.0107927	1.34165	0.000119176	0.00177499	1.91394	5.12178e-14	1.07401e-11	4.10204	3.59993	4.40996	3.44643	4.90974	3.4863	5.52179	5.08451	6.60547	5.24347
73529	1700072B07Rik	NA	NA	NA	NA	NA	NA	NA	NA	NA	NA	NA	NA	NA	NA	NA	NA	0	0	0	0	0	0	0	0	0	0
73505	1700072O05Rik	NA	NA	NA	NA	NA	NA	NA	NA	NA	NA	NA	NA	NA	NA	NA	NA	0	0	0	0	0	0	0	0	0	0
381827	1700073E17Rik	NA	1.30565	0.710156	NA	-1.43117	0.685294	NA	-0.819222	0.816674	NA	-1.19623	0.733507	NA	-0.735979	0.83502	NA	-1.86256	-1.94735	-1.92724	-1.84499	-1.91629	-1.8741	-1.90858	-1.8217	-1.92409	-1.88184
73480	1700074H08Rik	NA	0.0128434	0.9971	NA	NA	NA	NA	0.623446	0.859961	NA	NA	NA	NA	1.27191	0.7172	NA	-2.10785	-2.10868	-2.12245	-2.12323	-2.08892	-2.1152	-2.11057	-2.10842	-2.06733	-2.12012
73481	1700074P13Rik	ENSMUSG00000029883	NA	NA	NA	NA	NA	NA	NA	NA	NA	NA	NA	NA	NA	NA	NA	0	0	0	0	0	0	0	0	0	0
73532	1700080E11Rik	ENSMUSG00000032566	NA	NA	NA	NA	NA	NA	NA	NA	NA	NA	NA	NA	NA	NA	NA	0	0	0	0	0	0	0	0	0	0
73489	1700080N15Rik	NA	NA	NA	NA	NA	NA	NA	NA	NA	NA	NA	NA	NA	NA	NA	NA	0	0	0	0	0	0	0	0	0	0
74279	1700080O16Rik	ENSMUSG00000031118	NA	NA	NA	NA	NA	NA	NA	NA	NA	NA	NA	NA	NA	NA	NA	0	0	0	0	0	0	0	0	0	0
73477	1700081H04Rik	NA	NA	NA	NA	NA	NA	NA	NA	NA	NA	NA	NA	NA	NA	NA	NA	0	0	0	0	0	0	0	0	0	0
67348	1700083H02Rik	NA	NA	NA	NA	NA	NA	NA	NA	NA	NA	NA	NA	NA	NA	NA	NA	0	0	0	0	0	0	0	0	0	0
67350	1700084E18Rik	NA	-0.196677	0.789046	NA	0.212585	0.837211	NA	0.49537	0.64915	NA	2.31532	0.0692035	NA	-0.294322	0.735328	NA	1.49873	1.57218	1.39091	1.27237	1.36255	1.29504	1.71997	1.06647	1.46132	1.54358
74280	1700084F23Rik	NA	NA	NA	NA	NA	NA	NA	NA	NA	NA	NA	NA	NA	NA	NA	NA	0	0	0	0	0	0	0	0	0	0
73486	1700084J12Rik	NA	-0.165144	0.849143	NA	-0.200059	0.780145	NA	0.681539	0.692254	NA	0.316021	0.791828	NA	0.128381	0.927365	NA	1.224	1.29764	1.5635	1.71287	1.00192	0.877884	1.22074	1.19643	1.04278	1.01932
73487	1700084M14Rik	NA	NA	NA	NA	NA	NA	NA	NA	NA	NA	NA	NA	NA	NA	NA	NA	0	0	0	0	0	0	0	0	0	0
74283	1700085C21Rik	NA	NA	NA	NA	NA	NA	NA	NA	NA	NA	NA	NA	NA	NA	NA	NA	0	0	0	0	0	0	0	0	0	0
74284	1700086L19Rik	NA	1.87692	0.51775	NA	-0.00090776	0.999186	NA	1.89223	0.0550272	NA	0.767352	0.828094	NA	NA	NA	NA	-0.0184365	-0.254123	0.490113	0.471355	0.674848	0.194992	0.167322	-0.181071	-0.213877	-0.212997
73516	1700086O06Rik	NA	-0.431666	0.0302247	0.175178	-0.349463	0.110803	0.228105	-0.0425921	0.867784	0.942964	-0.645349	0.0258288	0.118523	-0.393323	0.239833	0.444726	5.79786	6.07199	5.76238	5.97424	5.63436	5.75214	5.43904	5.72407	5.21522	5.43954
67349	1700086P04Rik	NA	-0.479207	0.506473	NA	-0.452409	0.501854	NA	-0.793363	0.451606	NA	-1.01229	0.313611	NA	0.34761	0.698786	NA	1.81934	2.09423	1.85895	2.04507	1.53516	1.74365	1.54758	1.91041	1.74209	1.62842
27660	1700088E04Rik	ENSMUSG00000033029	-0.163297	0.884395	NA	-0.751536	0.508767	NA	-0.497672	0.728404	NA	-2.91683	0.162435	NA	-0.224108	0.862324	NA	0.508464	0.559041	0.372941	0.544836	0.269409	0.416587	0.149677	0.501424	0.384963	0.432351
73553	1700091H14Rik	NA	NA	NA	NA	-0.727633	0.836864	NA	NA	NA	NA	NA	NA	NA	NA	NA	NA	-2.39988	-2.40008	-2.39693	-2.39058	-2.39521	-2.39514	-2.394	-2.39347	-2.39644	-2.39636
67357	1700092C02Rik	NA	-0.708495	0.841097	NA	NA	NA	NA	NA	NA	NA	NA	NA	NA	NA	NA	NA	-2.39938	-2.39382	-2.39679	-2.39696	-2.39529	-2.39522	-2.39423	-2.39376	-2.39636	-2.39629
73554	1700092C10Rik	NA	-0.708495	0.841097	NA	NA	NA	NA	NA	NA	NA	NA	NA	NA	NA	NA	NA	-2.39922	-2.3939	-2.39675	-2.39691	-2.39531	-2.39525	-2.39429	-2.39385	-2.39633	-2.39627
73576	1700092E19Rik	NA	NA	NA	NA	NA	NA	NA	NA	NA	NA	NA	NA	NA	NA	NA	NA	0	0	0	0	0	0	0	0	0	0
73536	1700092K14Rik	NA	NA	NA	NA	NA	NA	NA	NA	NA	NA	NA	NA	NA	NA	NA	NA	0	0	0	0	0	0	0	0	0	0
74307	1700092M07Rik	ENSMUSG00000090840	0.383551	0.69669	NA	1.00742	0.190489	NA	1.49415	0.0920863	NA	0.596629	0.674745	NA	1.31789	0.220923	NA	1.25467	1.12885	1.66973	1.27076	1.66848	1.2263	1.31864	1.12169	1.41694	1.05408
74296	1700093J21Rik	NA	0.0128434	0.9971	NA	1.94622	0.474025	NA	2.1633	0.40021	NA	0.782056	0.772269	NA	-0.733074	0.795259	NA	-1.45614	-1.46039	-1.3056	-1.49133	-1.2933	-1.47278	-1.27819	-1.39582	-1.42358	-1.36154
67358	1700093K21Rik	ENSMUSG00000020286	-1.17096	0.00936337	0.0917179	-0.533309	0.442287	NA	-0.242325	0.828254	NA	-1.5043	0.242571	NA	-0.792239	0.233141	NA	2.60766	3.25417	2.24316	2.4742	2.00134	2.06151	1.83781	2.16498	2.28068	2.63824
73545	1700094D03Rik	ENSMUSG00000027942	0.0685062	0.668583	0.84256	-0.157787	0.444001	0.587501	0.00762088	0.978451	0.991937	-0.031825	0.850063	0.938645	0.0954622	0.566345	0.746677	7.1683	7.10558	6.5407	6.6155	6.72806	6.56501	7.17321	7.33112	7.2835	7.21399
67523	1700094J05Rik	NA	-1.28903	0.713641	NA	-0.727633	0.836864	NA	-0.819222	0.816674	NA	NA	NA	NA	NA	NA	NA	-2.19964	-2.15642	-2.18975	-2.16845	-2.184	-2.16181	-2.17994	-2.17816	-2.1881	-2.18783
74304	1700094M24Rik	NA	NA	NA	NA	0.715035	0.83965	NA	NA	NA	NA	NA	NA	NA	NA	NA	NA	-2.40007	-2.40028	-2.39014	-2.39718	-2.39519	-2.39511	-2.39392	-2.39337	-2.39647	-2.39638
76995	1700095A13Rik	NA	NA	NA	NA	NA	NA	NA	NA	NA	NA	NA	NA	NA	NA	NA	NA	0	0	0	0	0	0	0	0	0	0
67524	1700095A21Rik	NA	NA	NA	NA	NA	NA	NA	NA	NA	NA	NA	NA	NA	NA	NA	NA	0	0	0	0	0	0	0	0	0	0
67360	1700095B10Rik	ENSMUSG00000098230	NA	NA	NA	NA	NA	NA	NA	NA	NA	NA	NA	NA	NA	NA	NA	0	0	0	0	0	0	0	0	0	0
74293	1700095J03Rik	NA	-0.708495	0.841097	NA	NA	NA	NA	NA	NA	NA	NA	NA	NA	NA	NA	NA	-2.39915	-2.39394	-2.39673	-2.39689	-2.39532	-2.39526	-2.39432	-2.39389	-2.39632	-2.39626
67927	1700096J18Rik	NA	0.8874	0.402794	NA	-0.416584	0.459057	NA	-0.182923	0.862724	NA	-1.24736	0.0805988	NA	0.569882	0.521408	NA	1.59679	1.3827	2.14422	2.35973	1.75412	1.7038	1.86088	2.56854	1.90897	1.70921
73571	1700096K18Rik	NA	-0.0763893	0.675546	0.846588	-0.11201	0.687134	0.788687	0.281379	0.414679	0.673715	0.672519	0.110033	0.317129	0.360204	0.224336	0.427727	5.73266	5.77519	5.35652	5.42851	5.05701	4.96977	4.85054	4.47294	5.03684	4.82489
67522	1700097N02Rik	NA	0.55615	0.799725	NA	-0.727633	0.836864	NA	NA	NA	NA	NA	NA	NA	NA	NA	NA	-1.98255	-2.01143	-2.05393	-2.02676	-2.04659	-2.04629	-2.04142	-2.03914	-2.05182	-2.05148
76624	1700099I09Rik	NA	-0.0701316	0.876154	0.945327	0.717033	0.157256	0.287903	0.427665	0.492036	NA	-0.852065	0.0711138	0.235159	0.469112	0.442948	NA	3.32198	3.33798	3.61522	3.21428	3.2021	2.95736	3.32954	3.86401	3.17067	2.9998
73584	1700100L14Rik	NA	0.0128434	0.9971	NA	NA	NA	NA	-0.0782932	0.973397	NA	NA	NA	NA	NA	NA	NA	-2.03911	-2.04013	-2.05702	-2.05798	-2.01588	-1.98294	-2.00986	-2.0398	-2.05456	-2.05416
100504641	1700101I11Rik	NA	-0.0424885	0.941311	NA	-1.05804	0.0796178	NA	-1.20003	0.474398	NA	0.669376	0.531247	NA	0.890662	0.510163	NA	2.03535	2.05743	1.9371	2.43303	1.38704	1.39101	1.51427	1.51181	1.47175	1.30471
73575	1700101O22Rik	ENSMUSG00000102096	NA	NA	NA	NA	NA	NA	NA	NA	NA	NA	NA	NA	NA	NA	NA	0	0	0	0	0	0	0	0	0	0
68230	1700102H20Rik	NA	-0.722642	0.219287	NA	0.115699	0.868563	NA	-0.691899	0.319222	NA	0.182439	0.846249	NA	0.387837	0.737712	NA	2.12069	2.45797	2.18311	2.11296	2.13835	2.36475	1.92935	1.95256	1.82214	1.81146
112418	1700102P08Rik	ENSMUSG00000032611	0.241203	0.599448	0.802824	0.27278	0.486311	0.625598	1.20045	0.25746	NA	-0.115058	0.820546	0.926126	-0.144366	0.783997	0.888485	3.16522	3.03716	3.63733	3.46282	2.9222	2.32631	3.17683	3.52358	3.09546	3.1703
100504592	1700104B16Rik	NA	NA	NA	NA	0.715035	0.83965	NA	NA	NA	NA	NA	NA	NA	NA	NA	NA	-2.40008	-2.4003	-2.39012	-2.39719	-2.39518	-2.39511	-2.39391	-2.39336	-2.39647	-2.39638
654802	1700105P06Rik	NA	1.97003	0.545289	NA	-0.727633	0.836864	NA	2.00168	0.380168	NA	2.48899	0.258739	NA	-0.01464	0.996694	NA	-1.30756	-1.48594	-1.4545	-1.39098	-1.05601	-1.37117	-1.22887	-1.41992	-1.38411	-1.38331
73272	1700108F19Rik	NA	NA	NA	NA	NA	NA	NA	-0.819222	0.816674	NA	NA	NA	NA	NA	NA	NA	-2.40058	-2.40082	-2.39713	-2.39735	-2.39511	-2.38735	-2.39369	-2.39307	-2.39655	-2.39645
68245	1700108J01Rik	ENSMUSG00000100585	0.734173	0.835418	NA	-0.727633	0.836864	NA	NA	NA	NA	NA	NA	NA	NA	NA	NA	-2.32036	-2.33265	-2.32691	-2.31534	-2.32378	-2.32366	-2.32158	-2.32061	-2.32601	-2.32587
67355	1700109G14Rik	ENSMUSG00000101505	NA	NA	NA	NA	NA	NA	NA	NA	NA	NA	NA	NA	NA	NA	NA	0	0	0	0	0	0	0	0	0	0
78471	1700109G15Rik	NA	NA	NA	NA	NA	NA	NA	NA	NA	NA	NA	NA	NA	NA	NA	NA	0	0	0	0	0	0	0	0	0	0
77036	1700109H08Rik	ENSMUSG00000008307	-0.173216	0.671942	0.844572	0.749688	0.0215316	0.0829404	0.69984	0.0362515	0.193994	0.219539	0.625701	0.824338	0.407357	0.405326	0.615753	3.90534	3.97587	5.69327	5.13902	4.73413	4.35795	4.34518	4.17448	3.95787	3.7611
73591	1700109I08Rik	NA	NA	NA	NA	NA	NA	NA	NA	NA	NA	NA	NA	NA	NA	NA	NA	0	0	0	0	0	0	0	0	0	0
76634	1700110C19Rik	NA	0.144725	0.831879	NA	1.00643	0.408804	NA	1.62896	0.504723	NA	-0.835382	0.531363	NA	0.799508	0.493737	NA	1.38361	1.34094	1.05961	0.798637	0.678328	0.548591	0.832806	1.02227	0.989388	0.787438
73549	1700110I01Rik	NA	NA	NA	NA	NA	NA	NA	NA	NA	NA	NA	NA	NA	NA	NA	NA	0	0	0	0	0	0	0	0	0	0
73558	1700110K17Rik	NA	-0.097582	0.905545	NA	-0.211063	0.687874	NA	-1.19186	0.239138	NA	NA	NA	NA	0.298157	0.868483	NA	1.3196	1.37483	2.03796	2.16763	1.03172	1.45554	0.802833	0.744412	0.947295	0.883002
73585	1700111E14Rik	NA	NA	NA	NA	NA	NA	NA	NA	NA	NA	NA	NA	NA	NA	NA	NA	0	0	0	0	0	0	0	0	0	0
74305	1700111N16Rik	NA	NA	NA	NA	NA	NA	NA	NA	NA	NA	NA	NA	NA	0.706689	0.841496	NA	-2.40007	-2.40028	-2.39698	-2.39719	-2.39519	-2.39511	-2.39392	-2.39336	-2.38962	-2.39638
73590	1700112H15Rik	NA	-0.438722	0.66409	NA	1.33213	0.204918	NA	0.434025	0.692738	NA	-1.28943	0.106162	NA	-1.16817	0.460647	NA	1.11952	1.21423	1.49945	1.11929	1.42219	1.17215	1.27774	1.96193	0.951641	1.17483
76642	1700113A16Rik	NA	-0.222768	0.0487067	0.227304	-0.545301	3.96146e-05	0.00188171	-0.414386	0.00812036	0.0845041	0.27947	0.130432	0.352842	-0.263734	0.152746	0.336439	8.48743	8.63612	8.46628	8.83806	7.27693	7.48726	7.40678	7.28881	7.76818	7.9514
76640	1700113H08Rik	ENSMUSG00000047129	NA	NA	NA	NA	NA	NA	NA	NA	NA	NA	NA	NA	1.25103	0.721863	NA	-2.33344	-2.33386	-2.32735	-2.32775	-2.3238	-2.32365	-2.3213	-2.3202	-2.29928	-2.32616
76649	1700119H24Rik	NA	NA	NA	NA	NA	NA	NA	NA	NA	NA	-0.675316	0.848446	NA	NA	NA	NA	-2.40143	-2.40171	-2.39736	-2.39762	-2.39499	-2.39489	-2.39332	-2.38356	-2.39668	-2.39657
641387	1700120B22Rik	NA	-0.707424	0.800025	NA	1.28019	0.715472	NA	0.85763	0.781387	NA	0.0366356	0.984448	NA	0.772851	0.750714	NA	-1.2466	-1.18656	-1.14861	-1.28982	-1.02095	-1.19723	-1.11378	-1.03693	-1.08005	-1.21041
73600	1700120C14Rik	NA	-0.0070318	0.990837	NA	-0.84955	0.210807	NA	-0.0193662	0.984356	NA	-0.697464	0.507675	NA	0.929397	0.291084	NA	2.12766	2.11573	1.8596	2.24076	1.80303	1.80479	1.79754	1.93001	1.97945	1.65488
73606	1700120E14Rik	NA	NA	NA	NA	NA	NA	NA	NA	NA	NA	NA	NA	NA	NA	NA	NA	0	0	0	0	0	0	0	0	0	0
74314	1700120G07Rik	NA	-0.811121	0.748935	NA	1.33091	0.605816	NA	-0.077913	0.978434	NA	NA	NA	NA	-0.735979	0.83502	NA	-1.58856	-1.48919	-1.45317	-1.5647	-1.49371	-1.49312	-1.59345	-1.58899	-1.61388	-1.55826
68232	1700120K04Rik	NA	0.980415	0.0631931	NA	-0.112146	0.802216	0.870635	0.18697	0.798593	NA	-0.809394	0.24667	NA	-0.265036	0.709913	NA	3.01564	2.54738	3.14374	3.18669	2.69793	2.63461	2.65652	2.94059	2.47202	2.57286
76643	1700121L16Rik	NA	NA	NA	NA	NA	NA	NA	NA	NA	NA	NA	NA	NA	NA	NA	NA	0	0	0	0	0	0	0	0	0	0
76639	1700121N20Rik	NA	NA	NA	NA	NA	NA	NA	NA	NA	NA	NA	NA	NA	NA	NA	NA	0	0	0	0	0	0	0	0	0	0
73619	1700122E12Rik	NA	-0.375874	0.627918	NA	2.13701	0.148576	NA	1.51678	0.425544	NA	0.0649348	0.953306	NA	0.587965	0.618896	NA	1.11937	1.30152	0.950085	0.577321	0.919188	0.606229	0.946863	1.03133	1.05285	0.891245
73617	1700122H20Rik	NA	-0.494217	0.500658	NA	0.0370145	0.947876	NA	-0.828036	0.349201	NA	0.413735	0.746984	NA	-0.818967	0.363467	NA	1.74763	1.97065	2.19461	2.15158	1.73431	1.8972	1.51784	1.53256	1.63969	1.88137
76651	1700122O11Rik	ENSMUSG00000094928 /// ENSMUSG00000116059	NA	NA	NA	NA	NA	NA	NA	NA	NA	NA	NA	NA	NA	NA	NA	0	0	0	0	0	0	0	0	0	0
76658	1700123K08Rik	ENSMUSG00000029526	NA	NA	NA	NA	NA	NA	NA	NA	NA	NA	NA	NA	NA	NA	NA	0	0	0	0	0	0	0	0	0	0
78482	1700123L14Rik	NA	NA	NA	NA	NA	NA	NA	NA	NA	NA	0.767352	0.828094	NA	NA	NA	NA	-2.40103	-2.40129	-2.39725	-2.3975	-2.39505	-2.39496	-2.3851	-2.39281	-2.39661	-2.39651
100503636	1700123M08Rik	NA	0.231857	0.538988	0.760351	-0.306739	0.511319	0.647214	0.188933	0.825581	NA	-0.668107	0.437145	NA	0.0743427	0.912699	NA	3.41601	3.2813	3.17106	3.34714	2.80678	2.58887	2.28203	2.65485	2.69541	2.65606
73624	1700123O12Rik	ENSMUSG00000086080	NA	NA	NA	NA	NA	NA	NA	NA	NA	NA	NA	NA	NA	NA	NA	0	0	0	0	0	0	0	0	0	0
58248	1700123O20Rik	ENSMUSG00000040822	-0.170228	0.06049	0.253599	-0.388515	0.0124708	0.061884	-0.259471	0.0515493	0.233418	-0.105635	0.331758	0.606802	-0.339485	0.0011869	0.0107657	9.54899	9.65122	9.46182	9.68434	9.58192	9.58879	9.94314	10.1846	10.071	10.3023
68238	1700123O21Rik	NA	NA	NA	NA	NA	NA	NA	NA	NA	NA	NA	NA	NA	NA	NA	NA	0	0	0	0	0	0	0	0	0	0
67934	1700124L16Rik	NA	0.108522	0.904351	NA	-0.733582	0.791635	NA	-1.84493	0.326607	NA	-1.54373	0.38226	NA	0.985683	0.439316	NA	0.605279	0.589409	0.0466748	0.110488	0.205956	0.398303	0.0895165	0.432634	0.558488	0.313638
73628	1700125G02Rik	NA	NA	NA	NA	NA	NA	NA	NA	NA	NA	NA	NA	NA	NA	NA	NA	0	0	0	0	0	0	0	0	0	0
76657	1700125G22Rik	NA	NA	NA	NA	NA	NA	NA	NA	NA	NA	NA	NA	NA	NA	NA	NA	0	0	0	0	0	0	0	0	0	0
73609	1700125H03Rik	NA	NA	NA	NA	NA	NA	NA	NA	NA	NA	NA	NA	NA	NA	NA	NA	0	0	0	0	0	0	0	0	0	0
73634	1700125H20Rik	ENSMUSG00000018479	-1.19505	0.645885	NA	-2.5025	0.413595	NA	-0.597182	0.851297	NA	-0.675316	0.848446	NA	0.706689	0.841496	NA	-1.58971	-1.48904	-1.61886	-1.39932	-1.54907	-1.49317	-1.59414	-1.53436	-1.55939	-1.61402
73639	1700126H18Rik	NA	NA	NA	NA	NA	NA	NA	NA	NA	NA	NA	NA	NA	NA	NA	NA	0	0	0	0	0	0	0	0	0	0
73631	1700128A07Rik	NA	NA	NA	NA	NA	NA	NA	NA	NA	NA	NA	NA	NA	NA	NA	NA	0	0	0	0	0	0	0	0	0	0
76669	1700128F08Rik	NA	NA	NA	NA	NA	NA	NA	NA	NA	NA	-0.675316	0.848446	NA	NA	NA	NA	-2.40139	-2.40167	-2.39735	-2.39761	-2.39499	-2.3949	-2.39334	-2.38363	-2.39667	-2.39656
67932	1700129C05Rik	ENSMUSG00000021977	NA	NA	NA	NA	NA	NA	NA	NA	NA	NA	NA	NA	NA	NA	NA	0	0	0	0	0	0	0	0	0	0
69030	1810006J02Rik	NA	1.66079	0.126676	NA	0.564913	0.599848	NA	-0.500135	0.728119	NA	0.746844	0.74403	NA	-0.196542	0.891528	NA	0.747367	0.314263	0.635662	0.511112	0.241397	0.439133	0.44932	0.2536	0.383414	0.454993
69054	1810007C17Rik	NA	NA	NA	NA	NA	NA	NA	NA	NA	NA	NA	NA	NA	NA	NA	NA	0	0	0	0	0	0	0	0	0	0
69055	1810007D17Rik	NA	NA	NA	NA	NA	NA	NA	NA	NA	NA	NA	NA	NA	NA	NA	NA	0	0	0	0	0	0	0	0	0	0
69062	1810008B01Rik	NA	0.0128434	0.9971	NA	NA	NA	NA	NA	NA	NA	0.064115	0.985374	NA	0.736139	0.792339	NA	-1.97128	-1.97244	-1.99178	-1.99288	-1.982	-1.98159	-1.93779	-1.93476	-1.91435	-1.9512
100503969	1810008I18Rik	NA	NA	NA	NA	NA	NA	NA	NA	NA	NA	NA	NA	NA	NA	NA	NA	0	0	0	0	0	0	0	0	0	0
66276	1810009A15Rik	ENSMUSG00000071653	-0.179701	0.198452	0.469274	-0.323229	0.151229	0.281249	-0.314477	0.0663499	0.267706	0.215334	0.083738	0.26335	-0.0259826	0.855635	0.928616	9.41402	9.51907	9.23012	9.39344	8.9962	9.11131	9.06242	9.01257	9.4894	9.50966
73626	1810009J06Rik	ENSMUSG00000094808	NA	NA	NA	NA	NA	NA	NA	NA	NA	NA	NA	NA	NA	NA	NA	0	0	0	0	0	0	0	0	0	0
100040049	1810010D01Rik	NA	-0.223235	0.426818	0.683802	-0.058115	0.84434	0.900658	-0.173805	0.792557	NA	-0.0533609	0.906361	0.964057	0.223791	0.46549	0.666402	4.79959	4.93555	5.26597	5.32365	3.67626	3.83311	4.46374	4.49042	5.23982	5.07608
69066	1810010H24Rik	ENSMUSG00000078607	0.149241	0.684592	0.852363	-0.273774	0.535805	NA	0.0505909	0.955796	NA	0.429232	0.561571	NA	0.955998	0.115588	NA	3.44421	3.35516	3.07867	3.21326	2.57214	2.45552	2.71725	2.65756	3.04821	2.61681
69108	1810012K16Rik	NA	1.41276	0.14079	NA	-0.727633	0.836864	NA	0.778625	0.679589	NA	0.613634	0.760294	NA	1.50073	0.400585	NA	0.391722	-0.0739959	-0.434183	-0.36609	-0.189361	-0.266724	-0.110851	-0.244295	-0.0614144	-0.27944
69050	1810013A23Rik	NA	0.566158	0.412364	NA	-0.175552	0.732284	0.822604	1.7325	0.144565	NA	0.143739	0.834691	NA	-0.275818	0.753839	NA	2.39796	2.12391	2.82909	2.9303	2.33225	1.72227	2.37794	2.50739	2.13072	2.24528
69053	1810013L24Rik	ENSMUSG00000022507	0.0357249	0.657766	0.836062	0.107107	0.420066	0.565211	0.0435965	0.641392	0.820856	-0.139222	0.0598606	0.210213	-0.204988	0.034255	0.122274	10.656	10.6278	11.4667	11.3707	11.2397	11.0651	11.5138	11.7657	11.2965	11.4325
66263	1810014B01Rik	NA	-0.228585	0.281261	0.556364	-0.495326	0.0254116	0.0913016	0.115953	0.730203	0.87282	-0.355708	0.416135	0.680843	0.0901177	0.757923	0.871551	5.6934	5.8541	5.23867	5.53794	4.66791	4.78754	4.68828	4.70816	5.00529	4.94553
69166	1810018F18Rik	NA	NA	NA	NA	0.715035	0.83965	NA	NA	NA	NA	NA	NA	NA	NA	NA	NA	-2.40032	-2.40055	-2.38979	-2.39727	-2.39515	-2.39507	-2.39381	-2.39322	-2.39651	-2.39642
69771	1810019D21Rik	NA	0.0121746	0.983039	NA	-0.18882	0.892951	NA	0.100151	0.924994	NA	0.793252	0.420087	NA	-0.858775	0.246535	NA	2.07966	2.07618	1.4026	1.41423	1.69105	1.78185	1.99038	1.63781	1.7811	2.13181
613264	1810020O05Rik	NA	0.0223353	0.994954	NA	NA	NA	NA	-0.819222	0.816674	NA	-0.675316	0.848446	NA	-0.013857	0.99687	NA	-2.03911	-2.04013	-2.05703	-2.058	-2.04848	-2.01551	-2.04245	-2.00719	-2.02196	-2.02156
69120	1810021B22Rik	NA	-0.381148	0.133511	0.382496	-0.781813	0.0293305	0.0993901	-0.200532	0.715883	NA	-0.669111	0.255618	0.527065	-0.104337	0.816886	0.907472	4.62627	4.86511	4.19131	4.63742	3.60391	3.63506	3.41583	3.80201	3.88757	3.94273
69126	1810022K09Rik	ENSMUSG00000078784	-0.0287133	0.87686	0.945721	-0.198826	0.260571	0.406518	-0.0692869	0.716048	0.863839	0.0260727	0.882478	0.954673	-0.00277469	0.986724	0.993227	6.675	6.67956	6.84474	6.95153	7.11223	7.18666	7.11218	7.06617	6.87386	6.87275
329509	1810024B03Rik	ENSMUSG00000044145	-0.528877	0.139632	0.391389	-0.626099	0.117968	0.23864	-0.0992038	0.847728	0.934346	-0.465727	0.429218	0.69154	-0.761691	0.166587	0.356302	3.68583	4.00126	3.66532	3.99474	3.41634	3.57605	3.41826	3.48805	3.14847	3.52994
69170	1810026B05Rik	NA	0.0553316	0.540479	0.761335	-0.0605887	0.517577	0.652369	0.00977291	0.938401	0.974354	0.0725412	0.435756	0.696427	-0.154788	0.146769	0.327411	9.49291	9.44988	9.45023	9.47308	9.39531	9.36436	9.52978	9.51377	9.22935	9.32346
69155	1810030O07Rik	ENSMUSG00000044148	0.122792	0.109337	0.347923	0.180167	0.0202962	0.0804635	0.0978337	0.317611	0.592029	0.318925	0.000175246	0.00243643	0.148091	0.0992025	0.254845	10.0241	9.93554	10.0346	9.89661	9.80026	9.6425	9.94936	9.84222	10.188	10.0825
66293	1810032O08Rik	NA	-0.048957	0.697223	0.856891	-0.197488	0.114533	0.233565	0.318454	0.141158	0.388792	0.0770969	0.613406	0.816149	-0.153032	0.447557	0.651509	7.8054	7.83321	8.17543	8.28869	7.99015	7.93215	7.93596	7.72827	7.33814	7.43434
66503	1810034E14Rik	ENSMUSG00000091345	0.0978426	0.531106	0.755377	-0.00921562	0.967712	0.980166	-0.063399	0.873017	0.945342	-0.0347953	0.93438	0.975862	-0.00419464	0.987824	0.993687	6.22241	6.1441	5.81356	5.78198	4.66932	4.61778	4.57234	4.68078	5.16916	5.16918
67704	1810037I17Rik	ENSMUSG00000054091	-0.196172	0.427533	0.68397	-0.538505	0.114329	0.233339	-0.675004	0.0337574	0.187211	0.0556289	0.88386	0.955014	0.124692	0.718975	0.847966	4.93726	5.04891	5.00651	5.30028	4.87964	5.37891	4.86426	4.74072	4.81163	4.73838
67884	1810043G02Rik	ENSMUSG00000020284	-0.247746	0.0293551	0.172127	-0.638121	0.000128928	0.00437646	-0.30236	0.104313	0.335282	-0.101443	0.605064	0.811288	0.039249	0.807173	0.900888	8.26076	8.42279	7.94022	8.35076	7.25115	7.48753	7.07278	7.08376	8.16227	8.14352
69798	1810044D09Rik	NA	-0.320503	0.139336	0.391389	-0.538993	0.162737	0.294244	-0.535254	0.134908	0.379643	0.325643	0.567275	0.785891	-0.382185	0.424649	0.631995	4.90027	5.10993	4.55162	4.81863	4.15547	4.57853	3.98052	3.72762	3.87933	4.08273
69809	1810046K07Rik	ENSMUSG00000036027	0.0128434	0.9971	NA	NA	NA	NA	NA	NA	NA	NA	NA	NA	NA	NA	NA	-2.32085	-2.32117	-2.32643	-2.32673	-2.32377	-2.32366	-2.32189	-2.32107	-2.32566	-2.32554
69857	1810053B23Rik	NA	NA	NA	NA	NA	NA	NA	NA	NA	NA	NA	NA	NA	NA	NA	NA	0	0	0	0	0	0	0	0	0	0
72056	1810055G02Rik	ENSMUSG00000035372	-0.0674618	0.643735	0.828687	0.100515	0.462114	0.603593	0.00481844	0.975925	0.990971	0.248219	0.0613847	0.213916	-0.00304794	0.979411	0.990467	7.52967	7.56715	7.71625	7.63244	7.89826	7.78358	7.96781	7.91332	8.15485	8.1545
67705	1810058I24Rik	NA	-0.15109	0.181838	0.448071	-0.412291	0.0196895	0.0790907	-0.226631	0.0345188	0.189032	-0.131119	0.170293	0.417767	-0.284236	0.0346126	0.123125	11.1514	11.2433	11.0657	11.3178	10.6323	10.9088	10.3895	10.3521	10.2211	10.4
69820	1810059H22Rik	NA	-0.402687	0.780619	NA	0.709786	0.796685	NA	0.903348	0.441507	NA	0.286431	0.74652	NA	0.415433	0.4376	0.642916	1.00227	1.04071	0.912115	0.841672	1.48339	1.17574	1.70168	1.56851	2.40393	2.0991
72282	1810062G17Rik	ENSMUSG00000027713	0.376687	0.452321	0.703407	-0.251264	0.608782	NA	-0.0121489	0.98791	NA	-0.366475	0.787236	NA	0.952739	0.402839	NA	2.63386	2.42327	2.56656	2.6896	2.06673	2.08281	1.71168	1.79001	1.8621	1.64444
75602	1810062O18Rik	NA	0.1026	0.880198	NA	-0.116649	0.830938	NA	-0.793697	0.300256	NA	-0.941971	0.202711	NA	0.358079	0.667216	NA	2.22978	2.1554	2.56549	2.59375	2.0986	2.41549	2.19505	2.60248	2.20107	2.10053
69862	1810064F22Rik	NA	0.0128434	0.9971	NA	-0.00629435	0.998579	NA	NA	NA	NA	NA	NA	NA	-0.735979	0.83502	NA	-2.10785	-2.10867	-2.09599	-2.09677	-2.11541	-2.11513	-2.11054	-2.10841	-2.12033	-2.09368
69864	1810065E05Rik	ENSMUSG00000013653	NA	NA	NA	NA	NA	NA	-0.819222	0.816674	NA	NA	NA	NA	NA	NA	NA	-2.40081	-2.40107	-2.39719	-2.39743	-2.39508	-2.38694	-2.39359	-2.39294	-2.39658	-2.39648
69861	2010003K11Rik	ENSMUSG00000042041	NA	NA	NA	NA	NA	NA	NA	NA	NA	NA	NA	NA	NA	NA	NA	0	0	0	0	0	0	0	0	0	0
76770	2010005H15Rik	ENSMUSG00000095620	0.429333	0.817115	NA	-0.666876	0.616884	NA	-0.156783	0.898403	NA	1.22099	0.0161354	0.0839039	0.828056	0.0185677	0.0802092	1.75293	1.69854	1.86123	2.00883	2.4275	2.00271	3.34687	3.17121	4.74487	4.19038
72340	2010009K17Rik	NA	0.15886	0.893861	NA	0.438679	0.737959	NA	1.03315	0.457798	NA	0.30843	0.822802	NA	-0.198099	0.880863	NA	0.57959	0.581075	0.60553	0.530353	0.668013	0.461042	0.734402	0.583155	0.564445	0.669095
100503117	2010010A06Rik	NA	1.70248	0.303933	NA	-1.30682	0.550669	NA	-0.819222	0.816674	NA	0.548004	0.85438	NA	-0.540967	0.786746	NA	-0.869278	-1.09647	-1.12724	-0.99424	-1.17731	-1.10581	-1.02884	-1.08776	-1.05149	-0.981352
69206	2010016I18Rik	NA	0.698622	0.119243	0.36203	0.389389	0.539317	NA	0.159722	0.649374	0.825263	0.677628	0.132422	0.355962	0.907325	0.00431671	0.0284682	3.76642	3.40862	3.321	3.1712	4.41094	4.29837	4.27627	3.91371	4.84833	4.23122
72104	2010106C02Rik	NA	NA	NA	NA	NA	NA	NA	NA	NA	NA	NA	NA	NA	NA	NA	NA	0	0	0	0	0	0	0	0	0	0
67715	2010106E10Rik	ENSMUSG00000025528	NA	NA	NA	NA	NA	NA	NA	NA	NA	NA	NA	NA	NA	NA	NA	0	0	0	0	0	0	0	0	0	0
75610	2010109A12Rik	ENSMUSG00000029384	0.363559	0.799064	NA	-0.0858923	0.937455	NA	-0.189775	0.864932	NA	0.071818	0.97181	NA	0.534181	0.777133	NA	0.325024	0.257062	0.496261	0.485467	0.481759	0.663494	0.337945	0.269715	0.292028	0.205489
67038	2010109I03Rik	ENSMUSG00000063522	-1.52936	0.220001	NA	-0.776452	0.611249	NA	-0.983023	0.636446	NA	-1.46012	0.293373	NA	-1.97814	0.0930583	NA	0.25983	0.575515	0.261546	0.37111	0.212347	0.331497	0.356322	0.765433	0.323876	0.845679
100503082	2010110K18Rik	NA	-0.0300755	0.913369	0.961893	-0.421243	0.210235	0.350562	-0.289861	0.4845	0.723548	0.393708	0.567742	NA	0.751367	0.342418	NA	4.39236	4.39899	4.14383	4.4169	3.80275	4.1143	3.53907	3.19551	3.15583	2.90795
72061	2010111I01Rik	ENSMUSG00000021458	-0.0977897	0.199679	0.470946	-0.041711	0.624129	0.740943	-0.0811288	0.394561	0.656119	0.00093695	0.991278	0.996997	0.0643259	0.578189	0.756168	10.5346	10.5944	10.7047	10.7143	10.35	10.49	10.159	10.0785	10.4927	10.4437
68355	2010204K13Rik	NA	0.034797	0.925197	0.967125	-0.358333	0.444948	0.588501	0.0868124	0.851	0.935305	-0.0947127	0.881507	NA	0.301396	0.666337	NA	3.89062	3.87034	3.90183	4.04143	3.79196	3.90483	3.49081	3.35194	3.25153	3.07632
72097	2010300C02Rik	ENSMUSG00000026090	0.935539	0.000292679	0.00960699	0.721244	0.00384194	0.0327838	0.150316	0.555044	0.769248	0.111614	0.788054	0.910854	1.59799	0.039177	NA	5.50407	4.8741	5.71491	5.1987	5.26819	5.483	4.833	4.43991	3.99269	3.43029
69884	2010300F17Rik	NA	0.734173	0.835418	NA	-0.727633	0.836864	NA	NA	NA	NA	NA	NA	NA	-0.735979	0.83502	NA	-2.24834	-2.26688	-2.25822	-2.24077	-2.2535	-2.25331	-2.25018	-2.24872	-2.25686	-2.23867
72122	2010308F09Rik	NA	-0.518918	0.765407	NA	-0.74691	0.692526	NA	1.32687	0.707128	NA	NA	NA	NA	-0.735979	0.83502	NA	-1.30488	-1.286	-1.35725	-1.30077	-1.34198	-1.45774	-1.44761	-1.44289	-1.46924	-1.41034
72131	2010310C07Rik	NA	2.39069	0.200795	NA	0.0125757	0.993759	NA	1.46816	0.488016	NA	-1.26907	0.576972	NA	2.70233	0.107707	NA	-0.235018	-0.560679	-0.267167	-0.275023	-0.367028	-0.509819	-0.419798	-0.328357	-0.0891202	-0.52127
630836	2010315B03Rik	ENSMUSG00000074829 /// ENSMUSG00000098810	-0.11943	0.246992	0.521966	-0.273876	0.0855026	0.192051	-0.132082	0.382608	0.646165	-0.756651	5.86781e-06	0.000142052	-0.147193	0.253292	0.46064	8.723	8.80001	7.97269	8.12811	8.11681	8.20745	8.14028	8.6175	8.6947	8.78314
72093	2010320M18Rik	NA	-0.332951	0.0700269	0.274816	-0.610322	0.029037	0.0988379	-0.247656	0.368155	0.634955	0.166399	0.547881	0.773309	-0.427932	0.0695523	0.200475	6.79202	7.01285	6.39021	6.72912	5.93989	6.04372	5.93817	5.90503	6.35904	6.6388
72275	2200002D01Rik	ENSMUSG00000030587	0.0978478	0.867722	NA	0.247635	0.597255	0.717706	0.488838	0.200331	0.467736	0.624806	0.0578157	0.206032	0.749882	0.0325374	0.118569	3.52168	3.5	4.11557	3.95574	5.08593	4.84269	5.05374	4.57085	4.7647	4.28956
69147	2200002J24Rik	ENSMUSG00000013083	-1.51287	0.481516	NA	-0.00457743	0.998245	NA	-0.127256	0.957221	NA	-1.43025	0.6783	NA	0.706689	0.841496	NA	-1.31644	-1.1443	-1.21734	-1.22007	-1.15558	-1.13617	-1.32087	-1.18212	-1.27898	-1.34484
70057	2210008F06Rik	NA	0.648573	0.146218	0.400924	0.370222	0.444585	NA	1.24967	0.0413885	NA	-0.909931	0.545415	NA	1.17511	0.357426	NA	2.9871	2.61894	2.88394	2.6598	2.65041	2.28113	2.07937	1.9113	1.92607	1.68416
67373	2210010C04Rik	ENSMUSG00000029882	0.641616	0.765933	NA	-0.00629435	0.998579	NA	NA	NA	NA	NA	NA	NA	NA	NA	NA	-1.90599	-1.93905	-1.95567	-1.95662	-1.97933	-1.97898	-1.9734	-1.9708	-1.98531	-1.98493
70134	2210011C24Rik	ENSMUSG00000074217	-0.480779	0.026095	0.161464	-0.830411	0.00477637	0.0362698	0.0212757	0.95963	0.983109	-0.9957	0.449498	NA	-0.986729	0.506436	NA	5.07854	5.4204	4.52457	5.06467	3.56036	3.84605	2.99413	2.84826	2.58011	2.74597
70153	2210016F16Rik	ENSMUSG00000021550	-0.166619	0.132804	0.381498	-0.422222	0.0118383	0.0600422	-0.225225	0.0714807	0.278006	0.266879	0.0088869	0.0541045	-0.103456	0.321858	0.533784	10.4385	10.54	10.3079	10.5589	10.188	10.3153	10.295	10.1471	10.5595	10.6284
72357	2210016L21Rik	ENSMUSG00000029559	-0.267955	0.000922009	0.0212564	-0.428469	0.0112966	0.0584753	-0.170636	0.21938	0.489496	-0.0645929	0.610304	0.814224	-0.272468	0.0131099	0.0632936	9.59875	9.7698	9.39574	9.64544	9.56927	9.75801	9.4391	9.41688	9.40232	9.57651
73644	2210039B01Rik	NA	NA	NA	NA	NA	NA	NA	NA	NA	NA	NA	NA	NA	0.706689	0.841496	NA	-2.40024	-2.40046	-2.39703	-2.39724	-2.39516	-2.39509	-2.39385	-2.39327	-2.38937	-2.39641
78354	2210407C18Rik	ENSMUSG00000037145	NA	NA	NA	NA	NA	NA	NA	NA	NA	NA	NA	NA	NA	NA	NA	0	0	0	0	0	0	0	0	0	0
73652	2210408F21Rik	NA	-0.229083	0.132624	0.381333	-0.495897	0.0100841	0.0550107	-0.342154	0.114134	0.349341	0.221099	0.321981	0.596975	0.00058177	0.997195	0.998329	6.51086	6.65573	6.47774	6.77959	6.1316	6.2905	6.35085	6.26449	6.90481	6.89803
72371	2210408I21Rik	ENSMUSG00000071252	0.126906	0.569021	0.779917	-0.197511	0.296776	0.445731	-0.176201	0.440598	0.692039	-0.398569	0.226974	0.49143	-0.242081	0.408102	0.618225	5.51009	5.42548	5.82342	5.93518	5.37605	5.64677	5.1678	5.24197	5.10681	5.24038
70157	2210409D07Rik	NA	NA	NA	NA	NA	NA	NA	NA	NA	NA	NA	NA	NA	NA	NA	NA	0	0	0	0	0	0	0	0	0	0
72381	2210409E12Rik	NA	NA	NA	NA	0.715035	0.83965	NA	-0.104952	0.976267	NA	-0.124676	0.959529	NA	1.43971	0.683482	NA	-1.88872	-1.89025	-1.81732	-1.868	-1.70597	-1.80388	-1.84453	-1.7421	-1.76438	-1.86223
70143	2210414B05Rik	ENSMUSG00000085394	NA	NA	NA	1.87998	0.523139	NA	0.623446	0.859961	NA	1.49129	0.434122	NA	0.186082	0.941715	NA	-1.48319	-1.48579	-1.20315	-1.45545	-1.17133	-1.4351	-1.28886	-1.2834	-1.31386	-1.31841
70393	2210416O15Rik	NA	0.491115	0.578961	NA	0.0938599	0.88648	NA	1.11745	0.291032	NA	-0.508323	0.756429	NA	NA	NA	NA	1.15644	0.996423	1.6893	1.59912	1.17256	0.924848	0.930287	0.907741	0.526886	0.528154
70138	2210417A02Rik	NA	0.703222	0.465534	NA	0.385846	0.854327	NA	0.683105	0.797749	NA	NA	NA	NA	-0.792088	0.771643	NA	-0.05148	-0.247879	-0.519515	-0.586833	-0.716264	-0.576707	-0.437469	-0.701476	-0.648519	-0.571567
76961	2210420H20Rik	NA	NA	NA	NA	NA	NA	NA	NA	NA	NA	NA	NA	NA	NA	NA	NA	0	0	0	0	0	0	0	0	0	0
69542	2300002M23Rik	ENSMUSG00000039269	NA	NA	NA	NA	NA	NA	NA	NA	NA	NA	NA	NA	NA	NA	NA	0	0	0	0	0	0	0	0	0	0
100502865	2300003K06Rik	ENSMUSG00000078257	NA	NA	NA	NA	NA	NA	NA	NA	NA	NA	NA	NA	NA	NA	NA	0	0	0	0	0	0	0	0	0	0
69478	2300009A05Rik	ENSMUSG00000032403	-0.287001	0.0272057	0.165562	-0.566328	0.000868418	0.0145776	-0.451134	0.0202715	0.144365	-0.326603	0.127368	0.348344	-0.500271	0.00481866	0.0308734	7.36042	7.54685	7.16548	7.51995	6.68293	6.95672	6.70101	6.92976	6.63143	6.93844
76432	2310001H17Rik	NA	-0.636857	8.55567e-05	0.00387553	-0.764731	0.000316837	0.00799732	-1.18833	5.83629e-08	1.09408e-05	-1.07716	1.08939e-12	1.69586e-10	-1.0533	1.42443e-08	9.32436e-07	7.14038	7.5397	7.20467	7.66349	7.21927	7.89916	7.19965	8.00071	6.8544	7.50609
69517	2310001K24Rik	NA	NA	NA	NA	NA	NA	NA	NA	NA	NA	-0.675316	0.848446	NA	NA	NA	NA	-2.40139	-2.40167	-2.39735	-2.39761	-2.39499	-2.3949	-2.39334	-2.38363	-2.39667	-2.39656
69522	2310002D06Rik	NA	NA	NA	NA	NA	NA	NA	0.623446	0.859961	NA	NA	NA	NA	NA	NA	NA	-2.40099	-2.40125	-2.39724	-2.39748	-2.38673	-2.39496	-2.39351	-2.39284	-2.39661	-2.39651
100504720	2310002F09Rik	NA	NA	NA	NA	NA	NA	NA	NA	NA	NA	NA	NA	NA	-0.735979	0.83502	NA	-2.4003	-2.40053	-2.39705	-2.39726	-2.39515	-2.39507	-2.39382	-2.39323	-2.3965	-2.38919
71886	2310002L09Rik	ENSMUSG00000028396	NA	NA	NA	NA	NA	NA	NA	NA	NA	NA	NA	NA	NA	NA	NA	0	0	0	0	0	0	0	0	0	0
74248	2310003L06Rik	NA	NA	NA	NA	NA	NA	NA	NA	NA	NA	NA	NA	NA	NA	NA	NA	0	0	0	0	0	0	0	0	0	0
100504268	2310005A03Rik	NA	NA	NA	NA	NA	NA	NA	NA	NA	NA	NA	NA	NA	NA	NA	NA	0	0	0	0	0	0	0	0	0	0
70090	2310005E17Rik	NA	NA	NA	NA	NA	NA	NA	NA	NA	NA	NA	NA	NA	NA	NA	NA	0	0	0	0	0	0	0	0	0	0
71874	2310007B03Rik	ENSMUSG00000034159	NA	NA	NA	1.4374	0.683961	NA	-0.819222	0.816674	NA	NA	NA	NA	-0.735979	0.83502	NA	-2.20194	-2.2027	-2.14205	-2.19165	-2.18452	-2.15981	-2.18	-2.17802	-2.18908	-2.16435
72316	2310008N11Rik	NA	NA	NA	NA	-1.29399	0.712541	NA	0.623446	0.859961	NA	NA	NA	NA	NA	NA	NA	-2.26718	-2.26777	-2.25861	-2.22112	-2.25362	-2.25341	-2.23108	-2.24856	-2.25717	-2.25694
66364	2310009A05Rik	ENSMUSG00000098332	-0.263226	0.0744616	0.283454	-0.746507	0.000112141	0.00399658	-0.429691	0.0273938	0.168413	-0.134179	0.439935	0.69946	-0.267884	0.138332	0.31651	7.61005	7.77468	7.28078	7.73977	7.18737	7.47145	7.30985	7.39325	7.37337	7.54982
69549	2310009B15Rik	ENSMUSG00000079283	-0.150838	0.324628	0.597235	-0.584303	0.0192599	0.0780247	-0.189585	0.400794	0.66195	-0.19454	0.324585	0.599811	-0.0066329	0.973294	0.987178	6.90873	6.99837	6.68743	7.02222	6.72461	6.89718	6.82743	6.90386	6.80776	6.82328
78329	2310010J17Rik	NA	-0.0556991	0.848003	0.932834	-0.513446	0.0917515	0.201723	-0.272666	0.336	0.608141	0.601429	0.0837716	0.26335	0.0324145	0.925961	0.962709	5.00666	5.0208	5.04146	5.34021	5.24127	5.46003	5.05912	4.68628	4.76661	4.75982
66374	2310011J03Rik	ENSMUSG00000020133	-0.311024	0.0185891	0.135418	-0.584235	0.00389154	0.0329446	-0.237521	0.101121	0.330119	-0.0879973	0.325779	0.601024	-0.444237	0.000580984	0.00624495	10.7403	10.9266	10.4781	10.8117	10.8363	10.9262	10.971	11.099	10.9984	11.3015
69625	2310014F06Rik	NA	NA	NA	NA	NA	NA	NA	NA	NA	NA	NA	NA	NA	NA	NA	NA	0	0	0	0	0	0	0	0	0	0
69548	2310015A10Rik	NA	0.135145	0.324792	0.597427	0.0522254	0.732233	0.822604	-0.0356955	0.873448	0.945342	0.0408687	0.880578	0.953623	0.0429563	0.832374	0.915683	7.83237	7.72286	7.30399	7.25074	6.3348	6.3956	6.23341	6.17863	6.68078	6.65896
70100	2310015D24Rik	NA	NA	NA	NA	1.47369	0.676276	NA	-0.0737554	0.983334	NA	NA	NA	NA	NA	NA	NA	-2.20311	-2.20391	-2.14011	-2.19229	-2.15907	-2.1588	-2.18003	-2.17794	-2.18958	-2.18927
69566	2310016D03Rik	ENSMUSG00000102098	NA	NA	NA	NA	NA	NA	NA	NA	NA	NA	NA	NA	NA	NA	NA	0	0	0	0	0	0	0	0	0	0
69578	2310016G11Rik	NA	NA	NA	NA	NA	NA	NA	NA	NA	NA	NA	NA	NA	NA	NA	NA	0	0	0	0	0	0	0	0	0	0
69603	2310020H05Rik	NA	-0.708495	0.841097	NA	-0.727633	0.836864	NA	-0.819222	0.816674	NA	NA	NA	NA	NA	NA	NA	-2.26673	-2.24883	-2.2584	-2.24047	-2.25356	-2.23488	-2.25014	-2.24864	-2.25701	-2.25679
66367	2310022A10Rik	ENSMUSG00000049643	-0.0851688	0.227308	0.503313	-0.101793	0.297799	0.446663	-0.0635442	0.602532	0.799083	-0.408609	0.000136527	0.00199883	-0.321875	0.000244031	0.00317137	10.9961	11.0487	11.0881	11.1396	9.85775	9.84769	10.0788	10.397	10.3935	10.6013
69551	2310022B05Rik	ENSMUSG00000031983	0.0967412	0.336985	0.610049	0.0322169	0.774845	0.853258	0.14219	0.243229	0.516138	0.414881	0.00182724	0.0158027	0.239798	0.0393041	0.134329	8.78057	8.71198	8.69055	8.65257	8.82406	8.75853	8.99313	8.70346	9.13948	8.96962
69593	2310026I22Rik	NA	NA	NA	NA	NA	NA	NA	NA	NA	NA	NA	NA	NA	NA	NA	NA	0	0	0	0	0	0	0	0	0	0
75584	2310030A07Rik	NA	-0.725354	0.796919	NA	-1.30315	0.710612	NA	0.623446	0.859961	NA	NA	NA	NA	1.93506	0.541125	NA	-1.83647	-1.79574	-1.85957	-1.77673	-1.84854	-1.84809	-1.79873	-1.83736	-1.73027	-1.85589
66952	2310030G06Rik	ENSMUSG00000032062	-1.41849	0.688004	NA	NA	NA	NA	NA	NA	NA	0.767352	0.828094	NA	NA	NA	NA	-2.26635	-2.23088	-2.25823	-2.25876	-2.25351	-2.25331	-2.23217	-2.24872	-2.25687	-2.25665
67862	2310033P09Rik	ENSMUSG00000020441	-0.178756	0.114112	0.353812	-0.545909	0.000309395	0.00793129	-0.218351	0.112373	0.346889	0.108124	0.370882	0.642074	-0.185639	0.222767	0.42616	9.35983	9.47435	9.12071	9.46441	8.95679	9.14878	8.90431	8.7884	9.07986	9.20831
117172	2310034C09Rik	ENSMUSG00000068078	NA	NA	NA	NA	NA	NA	NA	NA	NA	NA	NA	NA	NA	NA	NA	0	0	0	0	0	0	0	0	0	0
75579	2310034G01Rik	NA	0.0714743	0.858456	0.93803	-0.2673	0.684999	NA	-0.0140474	0.964402	0.985594	0.330906	0.191399	0.447829	0.425886	0.272338	0.48244	4.16824	4.12367	3.7128	3.76211	5.50526	5.28541	5.83691	5.81396	4.66271	4.41223
69571	2310034O05Rik	NA	1.99684	0.464307	NA	-0.59855	0.781289	NA	-0.819222	0.816674	NA	NA	NA	NA	NA	NA	NA	-1.67991	-1.81666	-1.7047	-1.61581	-1.7831	-1.7375	-1.77476	-1.7711	-1.79152	-1.79098
67101	2310039H08Rik	ENSMUSG00000062619	-0.482816	0.00201937	0.0350439	-0.779124	0.00637532	0.0424844	-0.499419	0.022054	0.150766	-0.0283763	0.907643	0.964402	-0.0681948	0.742508	0.86212	6.6275	6.93557	6.32403	6.77363	6.33448	6.6531	6.38693	6.40223	6.5792	6.63372
69629	2310039L15Rik	NA	0.0128434	0.9971	NA	-0.727633	0.836864	NA	NA	NA	NA	NA	NA	NA	NA	NA	NA	-2.2485	-2.24904	-2.25788	-2.24132	-2.2534	-2.25322	-2.25025	-2.24887	-2.25659	-2.25638
70284	2310040G07Rik	NA	2.45572	0.269526	NA	-0.727633	0.836864	NA	NA	NA	NA	0.767352	0.828094	NA	1.25103	0.721863	NA	-1.78767	-1.94301	-1.92444	-1.88705	-1.91434	-1.91392	-1.86868	-1.90409	-1.84447	-1.92107
381792	2310040G24Rik	NA	-0.352728	0.0330486	0.183279	-0.396402	0.0890646	0.197679	-0.468373	0.0423333	0.2102	-0.116525	0.780789	0.907061	0.149848	0.640447	0.798429	6.21474	6.4476	6.05025	6.28585	5.34803	5.84199	5.03309	4.89823	5.25616	5.17533
75589	2310043L19Rik	NA	3.02089	0.0546188	NA	0.571457	0.26156	NA	0.554149	0.381156	NA	0.314741	0.732976	NA	-0.700193	0.244433	NA	1.81237	1.40306	2.90381	2.56629	2.41684	2.33116	2.43906	2.2281	2.40142	2.79711
69679	2310043O21Rik	NA	NA	NA	NA	NA	NA	NA	NA	NA	NA	NA	NA	NA	0.706689	0.841496	NA	-2.40007	-2.40028	-2.39698	-2.39719	-2.39519	-2.39511	-2.39392	-2.39336	-2.38962	-2.39638
69657	2310047D07Rik	NA	0.808037	0.236769	NA	-0.162368	0.852316	NA	-1.23687	0.405378	NA	-1.19818	0.625657	NA	0.634843	0.514445	NA	1.78156	1.37964	1.32548	1.35775	0.865094	1.11508	0.770178	0.91297	1.40006	1.15976
66533	2310050C09Rik	ENSMUSG00000090314	NA	NA	NA	NA	NA	NA	NA	NA	NA	NA	NA	NA	NA	NA	NA	0	0	0	0	0	0	0	0	0	0
67719	2310057J18Rik	ENSMUSG00000015519	NA	NA	NA	NA	NA	NA	NA	NA	NA	NA	NA	NA	NA	NA	NA	0	0	0	0	0	0	0	0	0	0
68277	2310057M21Rik	ENSMUSG00000040177	-0.0228262	0.858437	0.93803	-0.0303425	0.826709	0.888554	0.094893	0.511107	0.743212	0.0373914	0.785551	0.909823	-0.359936	0.0139382	0.0659983	7.47263	7.47973	7.72332	7.72307	7.75328	7.76058	7.72641	7.63548	7.29818	7.52377
69696	2310057N15Rik	ENSMUSG00000048830	NA	NA	NA	NA	NA	NA	NA	NA	NA	NA	NA	NA	NA	NA	NA	0	0	0	0	0	0	0	0	0	0
75694	2310058D17Rik	NA	0.0376083	0.878868	0.945834	-0.298519	0.337937	0.487188	0.39988	0.202524	0.47033	-0.110962	0.665798	0.849988	-0.199068	0.407419	0.617827	5.22126	5.19485	4.88566	5.03595	5.09101	4.8421	5.41464	5.51293	5.36358	5.48487
69662	2310061I04Rik	ENSMUSG00000050705	-0.108411	0.253055	0.528099	-0.300254	0.0164045	0.0718272	0.0300936	0.848193	0.934639	-0.155725	0.152471	0.388961	-0.298906	0.0141947	0.0667493	8.67901	8.74521	8.11439	8.28367	8.50058	8.38564	8.54377	8.74469	8.59962	8.79292
69661	2310061N02Rik	ENSMUSG00000050704	NA	NA	NA	NA	NA	NA	NA	NA	NA	NA	NA	NA	NA	NA	NA	0	0	0	0	0	0	0	0	0	0
74184	2310065F04Rik	NA	-0.708495	0.841097	NA	NA	NA	NA	NA	NA	NA	NA	NA	NA	NA	NA	NA	-2.39922	-2.3939	-2.39675	-2.39691	-2.39531	-2.39525	-2.39429	-2.39385	-2.39633	-2.39627
76455	2310067E19Rik	NA	NA	NA	NA	NA	NA	NA	NA	NA	NA	NA	NA	NA	NA	NA	NA	0	0	0	0	0	0	0	0	0	0
70281	2310068J16Rik	NA	-0.388189	0.365769	0.63527	0.181654	0.786413	NA	-0.337631	0.707093	NA	-0.446907	0.560511	NA	0.648762	0.319579	NA	2.75278	2.96853	2.34807	2.26476	1.98537	2.22835	2.43793	2.54715	2.59732	2.30682
69652	2310069B03Rik	NA	1.42527	0.313293	NA	-1.00629	0.465598	NA	-0.0810667	0.97512	NA	0.055517	0.987188	NA	1.00811	0.685371	NA	-0.409075	-0.657992	-0.612443	-0.42855	-0.592032	-0.662271	-0.80111	-0.717523	-0.614398	-0.750798
69659	2310069G16Rik	NA	NA	NA	NA	NA	NA	NA	NA	NA	NA	NA	NA	NA	NA	NA	NA	0	0	0	0	0	0	0	0	0	0
69699	2310079G19Rik	ENSMUSG00000045331	NA	NA	NA	NA	NA	NA	NA	NA	NA	NA	NA	NA	NA	NA	NA	0	0	0	0	0	0	0	0	0	0
69211	2310081J21Rik	NA	NA	NA	NA	NA	NA	NA	NA	NA	NA	NA	NA	NA	NA	NA	NA	0	0	0	0	0	0	0	0	0	0
668661	2410002F23Rik	ENSMUSG00000045411	-0.0498904	0.656814	0.835569	0.17212	0.241743	0.386014	0.649884	5.7691e-07	7.32255e-05	0.490604	0.00667337	0.0431035	-0.00865144	0.952312	0.97614	8.73706	8.76232	8.86169	8.7197	8.43285	8.17657	8.22465	7.76799	8.18176	8.18635
69729	2410003L11Rik	NA	1.85666	0.0498766	NA	1.16522	0.293975	NA	1.11645	0.303528	NA	1.90908	0.116035	NA	0.686208	0.443082	NA	2.07204	1.36975	1.87629	1.46731	1.6262	1.35279	1.87046	1.27121	1.903	1.65339
66421	2410004B18Rik	ENSMUSG00000036873	-0.244846	0.0224462	0.149606	-0.364264	0.00433489	0.0347128	-0.0842661	0.588725	0.789784	-0.0973777	0.3038	0.578618	-0.336346	0.0103065	0.0537801	8.88378	9.03287	8.94881	9.16242	9.25494	9.25711	9.31445	9.43876	9.05717	9.27721
69739	2410004I01Rik	NA	NA	NA	NA	NA	NA	NA	NA	NA	NA	NA	NA	NA	NA	NA	NA	0	0	0	0	0	0	0	0	0	0
73667	2410004P03Rik	ENSMUSG00000071398	-0.319256	0.469012	0.715658	0.155141	0.775865	NA	-0.391798	0.684906	NA	0.767352	0.828094	NA	-0.530731	0.807756	NA	2.42811	2.59972	2.32397	2.22168	1.5248	1.66603	1.18891	1.08153	1.14755	1.20271
69221	2410006H16Rik	NA	-0.259255	0.0358713	0.190818	-0.658347	0.00493392	0.0369476	-0.110108	0.513839	0.743871	0.28454	0.106926	0.311091	-0.239566	0.104107	0.262858	9.48233	9.65468	9.1101	9.52782	8.10475	8.24498	7.94667	7.72267	8.08567	8.23559
73648	2410012E07Rik	NA	NA	NA	NA	-0.727633	0.836864	NA	NA	NA	NA	NA	NA	NA	NA	NA	NA	-2.39988	-2.40008	-2.39693	-2.39058	-2.39521	-2.39514	-2.394	-2.39347	-2.39644	-2.39636
224904	2410015M20Rik	ENSMUSG00000049760	-0.30738	0.0497883	0.229897	-0.688877	0.00278344	0.0273261	-0.377766	0.0235307	0.15601	0.0989182	0.384078	0.654586	-0.210488	0.147548	0.328497	10.2191	10.4009	10.1598	10.568	10.097	10.356	10.032	9.95434	9.90621	10.0459
675325	2410017I17Rik	NA	-0.708495	0.841097	NA	NA	NA	NA	-2.07409	0.520189	NA	0.0460239	0.989272	NA	1.26972	0.717676	NA	-1.94884	-1.90635	-1.92908	-1.93038	-1.91758	-1.78553	-1.86561	-1.86205	-1.83806	-1.92524
69732	2410018L13Rik	NA	0.503976	0.68415	NA	-0.727633	0.836864	NA	-0.510137	0.794833	NA	0.0124935	0.997094	NA	-1.561	0.462466	NA	-0.613795	-0.71676	-1.00116	-0.928696	-0.837259	-0.711355	-0.893407	-0.887188	-0.925945	-0.717962
69750	2410021H03Rik	NA	0.734173	0.835418	NA	NA	NA	NA	NA	NA	NA	NA	NA	NA	-1.23983	0.724312	NA	-2.24852	-2.26603	-2.25785	-2.25835	-2.25339	-2.25321	-2.25026	-2.24888	-2.25657	-2.2224
100503842	2410022M11Rik	NA	-0.445043	0.0176788	0.131841	-0.526325	0.142793	0.270556	-0.371772	0.345553	0.615855	0.000244276	0.999596	0.999772	0.355296	0.244689	0.450558	5.6372	5.93567	4.9319	5.19486	4.44712	4.79867	4.49012	4.35197	5.02278	4.81313
76785	2410124H12Rik	ENSMUSG00000051297	NA	NA	NA	NA	NA	NA	NA	NA	NA	NA	NA	NA	NA	NA	NA	0	0	0	0	0	0	0	0	0	0
76792	2410131K14Rik	ENSMUSG00000032840	-0.168621	0.126514	0.372879	-0.0356438	0.859869	0.912108	-0.0215517	0.888018	0.952078	-0.076555	0.495041	0.738443	-0.164128	0.131624	0.306206	8.025	8.12837	7.67594	7.67217	7.87316	7.80462	8.20927	8.35399	8.554	8.66761
76797	2410137M14Rik	ENSMUSG00000064308	0.740792	0.793334	NA	NA	NA	NA	-0.819222	0.816674	NA	NA	NA	NA	NA	NA	NA	-2.15648	-2.17841	-2.18943	-2.19006	-2.18385	-2.16236	-2.17992	-2.1782	-2.18783	-2.18757
76803	2410141K09Rik	ENSMUSG00000074832	NA	NA	NA	NA	NA	NA	NA	NA	NA	NA	NA	NA	NA	NA	NA	0	0	0	0	0	0	0	0	0	0
72326	2500004C02Rik	NA	0.136997	0.54876	0.766117	-0.0290331	0.935827	0.960691	-0.0759704	0.806175	0.91447	0.123207	0.692079	0.863291	-0.0278847	0.921438	0.96065	5.48065	5.38586	4.7924	4.81159	4.99128	5.0464	5.22044	5.16464	5.09348	5.1165
72307	2510002D24Rik	ENSMUSG00000071632	-0.100423	0.407915	0.669823	-0.341315	0.121726	0.243374	-0.22504	0.306717	0.582051	0.197731	0.499746	0.741589	-0.0625051	0.77553	0.882691	7.53121	7.5932	7.0305	7.22621	6.18981	6.47893	6.0149	5.77141	6.15889	6.18617
72190	2510009E07Rik	ENSMUSG00000043391	-0.0148253	0.91089	0.960915	0.00117554	0.995373	0.99723	-0.110685	0.417513	0.675845	0.378212	0.00368236	0.0273134	0.352152	0.000305661	0.00375536	10.4492	10.4532	11.0415	11.004	10.7158	10.9326	10.4613	10.0864	10.9441	10.7037
77034	2510039O18Rik	ENSMUSG00000044496	-0.0117483	0.871036	0.944236	0.0127159	0.884698	0.929456	0.099611	0.390808	0.652954	-0.133699	0.0861506	0.268269	-0.0548189	0.519376	0.710326	11.1609	11.1629	11.0945	11.0685	11.6198	11.487	11.8567	12.0246	11.7957	11.8307
70319	2600006K01Rik	NA	0.150948	0.777804	NA	0.344034	0.590949	NA	-1.18423	0.190879	NA	-0.22508	0.835711	NA	-0.328769	0.729829	NA	2.35722	2.28974	2.18892	2.02109	1.73858	2.04991	1.67875	1.81572	1.74663	1.87373
66520	2610001J05Rik	ENSMUSG00000052419	-0.169049	0.0549635	0.24123	-0.303821	0.0151338	0.068623	-0.178866	0.11825	0.355157	-0.132439	0.115443	0.32812	-0.34333	0.000589947	0.00631387	11.5179	11.6187	11.7796	11.9609	11.9132	12.05	11.8172	11.8994	11.2548	11.4662
67028	2610002M06Rik	ENSMUSG00000031242	0.115382	0.215054	0.4894	0.0993992	0.323642	0.473469	0.0269838	0.795548	0.909018	0.0797402	0.336683	0.611328	0.180202	0.120219	0.289763	9.09582	9.01708	9.14539	9.0649	9.57417	9.37658	9.82609	9.96294	9.55949	9.43928
381598	2610005L07Rik	NA	0.545178	0.281889	0.556982	0.359671	0.634926	NA	0.512519	0.369658	NA	-0.162062	0.745769	0.892323	0.883298	0.0288545	0.109239	3.39959	3.07535	3.08384	2.84149	3.30139	3.12341	3.58208	3.57464	3.91386	3.40167
72128	2610008E11Rik	ENSMUSG00000060301	0.138745	0.213571	0.487947	0.264986	0.127806	0.250968	0.825793	1.6922e-05	0.00107393	0.195271	0.331386	0.606802	0.041147	0.785147	0.889214	7.96314	7.86008	6.97575	6.79095	6.96015	6.53252	6.87356	6.68678	7.27797	7.24699
100503074	2610016A17Rik	NA	NA	NA	NA	NA	NA	NA	NA	NA	NA	NA	NA	NA	NA	NA	NA	0	0	0	0	0	0	0	0	0	0
69918	2610020C07Rik	NA	0.0745309	0.788366	0.906054	0.747692	0.0478921	0.133624	0.481118	0.207983	0.475857	-0.150069	0.755931	0.89573	0.0330917	0.934437	0.967874	4.8072	4.73834	5.15247	4.5962	4.56498	4.30614	4.20375	4.36092	4.1635	4.14318
668572	2610021A01Rik	NA	0.0843089	0.617825	0.814217	0.463452	0.0193344	0.0782241	0.25543	0.157547	0.414266	0.0821501	0.664052	0.848999	0.407624	0.0149004	0.0690957	7.29143	7.21565	6.88813	6.58348	6.98084	6.85447	6.93246	6.85669	7.37824	7.10963
69909	2610027K06Rik	NA	1.69165	0.430346	NA	1.28143	0.582178	NA	-0.66379	0.836789	NA	NA	NA	NA	-0.01464	0.996694	NA	-1.2574	-1.42359	-1.21379	-1.33888	-1.37606	-1.31425	-1.42591	-1.42095	-1.38749	-1.38675
72395	2610028E06Rik	NA	NA	NA	NA	NA	NA	NA	NA	NA	NA	NA	NA	NA	NA	NA	NA	0	0	0	0	0	0	0	0	0	0
76964	2610028H24Rik	ENSMUSG00000009114	0.756697	0.787635	NA	0.715035	0.83965	NA	-0.819222	0.816674	NA	NA	NA	NA	NA	NA	NA	-2.08113	-2.10869	-2.09582	-2.12333	-2.11553	-2.08852	-2.11059	-2.10842	-2.12053	-2.1202
72386	2610035D17Rik	NA	-0.241922	0.0989857	0.330603	-0.578347	0.00499333	0.0371448	-0.301135	0.310728	0.585922	1.91526	0.050782	NA	0.354833	0.526082	0.714869	7.14996	7.31968	6.7887	7.19213	5.06658	5.29194	4.27697	3.83181	4.41158	4.2883
69248	2610035F20Rik	NA	0.734173	0.835418	NA	NA	NA	NA	NA	NA	NA	-0.675316	0.848446	NA	NA	NA	NA	-2.3199	-2.3339	-2.32736	-2.32776	-2.3238	-2.32365	-2.32129	-2.30661	-2.32634	-2.32617
70040	2610037D02Rik	NA	-0.708495	0.841097	NA	1.28366	0.71478	NA	NA	NA	NA	NA	NA	NA	-0.01464	0.996694	NA	-2.13606	-2.10877	-2.06703	-2.1242	-2.11598	-2.11568	-2.11077	-2.10849	-2.09307	-2.09273
554327	2610042L04Rik	ENSMUSG00000079388	NA	NA	NA	NA	NA	NA	NA	NA	NA	NA	NA	NA	NA	NA	NA	0	0	0	0	0	0	0	0	0	0
72139	2610044O15Rik8	ENSMUSG00000071302	-0.0252969	0.851357	0.934895	-0.30763	0.23045	0.373425	0.120027	0.641867	0.820892	-0.131005	0.491242	0.736492	-0.156514	0.311317	0.522749	7.33928	7.3489	6.7183	6.8792	6.72029	6.58505	6.81663	6.93884	7.14575	7.24839
72481	2610203C22Rik	NA	0.021254	0.929752	0.968909	0.0435568	0.819148	0.883137	-0.150413	0.502684	0.737386	0.169761	0.673179	0.854714	0.195649	0.506598	0.700775	5.73592	5.70852	5.933	5.88219	5.4883	5.8062	5.07863	4.76738	5.1603	5.04538
72495	2610206C17Rik	NA	-0.153503	0.367237	0.635956	0.218233	0.210945	0.351147	0.0933082	0.731789	0.873405	-0.242222	0.262817	0.534831	0.00339012	0.985976	0.993165	6.28403	6.37513	6.60384	6.44583	6.4545	6.42124	6.16649	6.28655	6.20097	6.19613
67157	2610301B20Rik	ENSMUSG00000059482	-0.0118549	0.924088	0.966784	0.183794	0.262654	0.408631	-0.0889137	0.725533	0.869627	-0.100068	0.737909	0.887858	-0.0382069	0.843259	0.921952	7.0576	7.05729	6.7357	6.5934	5.76672	5.794	5.69804	5.7994	6.43262	6.4472
67170	2610306M01Rik	NA	-0.06735	0.737216	0.876995	-0.622931	0.0238306	0.0877536	-0.108482	0.76525	0.891333	-0.210964	0.522393	0.757415	-0.0918968	0.686933	0.828119	5.6472	5.67714	4.86021	5.20883	4.7422	4.72254	4.86129	5.06275	5.51099	5.5772
72518	2610307P16Rik	NA	1.17453	0.569482	NA	0.0128611	0.995444	NA	-0.333653	0.896553	NA	0.767352	0.828094	NA	-0.01464	0.996694	NA	-1.18572	-1.31667	-1.2672	-1.26908	-1.25339	-1.24984	-1.30236	-1.36078	-1.32599	-1.32522
72511	2610316D01Rik	NA	NA	NA	NA	NA	NA	NA	NA	NA	NA	NA	NA	NA	NA	NA	NA	0	0	0	0	0	0	0	0	0	0
70458	2610318N02Rik	ENSMUSG00000049916	-0.170699	0.309974	0.584443	-0.0938033	0.632349	0.74747	0.542414	0.0162604	0.126199	0.585787	0.120177	0.335817	-0.201145	0.514366	0.706533	6.13981	6.24595	6.28428	6.31909	5.98869	5.83852	5.43816	4.90944	5.06807	5.17322
72503	2610507B11Rik	ENSMUSG00000010277	-0.0516047	0.526416	0.753557	0.112057	0.350923	0.500058	-0.135127	0.297874	0.573124	-0.119962	0.154179	0.392134	0.247501	0.0185986	0.0803149	13.1734	13.2004	12.9889	12.8919	12.7715	12.9295	12.5729	12.5836	12.6936	12.5313
72203	2610507I01Rik	NA	0.0892483	0.507904	0.742024	0.000546745	0.997037	0.998168	0.00810323	0.978235	0.991828	0.506381	0.0502204	0.187666	0.428306	0.00156601	0.0132893	8.15332	8.08257	7.15117	7.13083	6.04338	5.92154	6.29312	6.14677	8.16827	7.84755
330173	2610524H06Rik	ENSMUSG00000092486	-0.437247	0.00130345	0.0262405	-0.74877	0.000612368	0.0120484	-0.51623	0.00827771	0.0853333	-0.281262	0.100818	0.298473	-0.0299416	0.858497	0.930063	8.11523	8.39891	7.80773	8.26877	7.49486	7.90912	7.46125	7.54287	7.76218	7.7871
70045	2610528A11Rik	ENSMUSG00000096001	-0.172742	0.640921	0.827118	0.116263	0.777055	0.854175	-0.109674	0.830908	NA	-0.0184088	0.980049	NA	0.188621	0.824474	NA	3.76443	3.88964	3.82409	3.71313	3.29161	3.38142	3.11415	3.00309	2.82917	2.73995
66451	2610528J11Rik	ENSMUSG00000028536	NA	NA	NA	NA	NA	NA	NA	NA	NA	NA	NA	NA	NA	NA	NA	0	0	0	0	0	0	0	0	0	0
72588	2700012I20Rik	NA	0.00824236	0.980069	0.991228	-0.249366	0.601213	0.720732	0.111506	0.840683	NA	0.644171	0.242743	0.51285	0.23537	0.623018	0.786496	3.87154	3.86174	3.36891	3.47421	3.39438	3.29746	3.57595	3.29004	3.63737	3.51965
72603	2700033N17Rik	NA	0.734173	0.835418	NA	NA	NA	NA	NA	NA	NA	NA	NA	NA	NA	NA	NA	-2.39384	-2.39921	-2.3967	-2.39685	-2.39533	-2.39528	-2.39437	-2.39395	-2.39631	-2.39624
67194	2700038G22Rik	NA	0.0854025	0.744962	0.882596	0.37487	0.07571	0.177442	0.446671	0.111059	0.344779	0.516608	0.14254	0.373526	0.0320916	0.9133	0.956362	5.76138	5.66777	5.9637	5.70013	5.58084	5.29888	5.37687	5.07782	5.20553	5.17081
78449	2700046A07Rik	NA	NA	NA	NA	1.44571	0.682199	NA	0.623446	0.859961	NA	NA	NA	NA	NA	NA	NA	-2.26788	-2.2685	-2.21916	-2.25951	-2.23383	-2.2535	-2.25004	-2.24842	-2.25743	-2.25718
67188	2700046G09Rik	NA	-0.00706917	0.978757	0.991035	-0.579266	0.089267	0.197987	0.374872	0.3035	0.578493	0.443266	0.309686	0.584218	0.100427	0.725555	0.852528	4.8026	4.79366	4.32769	4.65656	4.67271	4.36935	4.56905	4.39442	4.90964	4.84227
76967	2700049A03Rik	ENSMUSG00000034601	0.143551	0.241087	0.516708	0.329132	0.0160619	0.0710055	0.276309	0.211754	0.480487	-0.067207	0.806781	0.91911	0.25263	0.311532	0.522898	7.69508	7.58493	7.75871	7.5083	6.50034	6.46561	6.12463	6.01669	6.50106	6.35478
72578	2700054A10Rik	NA	-0.0636083	0.936956	NA	0.669221	0.532603	NA	-0.706873	0.50028	NA	0.0608719	0.962674	NA	1.375	0.425832	NA	1.34496	1.38677	1.4143	1.09051	1.07291	1.26596	1.03962	1.0766	1.01965	0.822779
68046	2700062C07Rik	ENSMUSG00000024273	-0.0530879	0.669211	0.843025	-0.289862	0.129729	0.253388	-0.0939906	0.505543	0.739326	-0.0231182	0.873687	0.949254	-0.124167	0.327282	0.539453	7.68985	7.71547	7.355	7.51277	7.72206	7.78964	7.82144	7.84074	7.79711	7.87487
72608	2700069I18Rik	NA	NA	NA	NA	-0.727633	0.836864	NA	1.19852	0.733021	NA	NA	NA	NA	NA	NA	NA	-2.26852	-2.26916	-2.25921	-2.23917	-2.21248	-2.25357	-2.24998	-2.2483	-2.25765	-2.2574
72609	2700070H01Rik	NA	0.0422163	0.982618	NA	-0.542747	0.842235	NA	0.623446	0.859961	NA	NA	NA	NA	-0.01464	0.996694	NA	-1.4162	-1.42603	-1.53648	-1.48409	-1.52232	-1.57573	-1.56633	-1.56195	-1.53241	-1.53175
108899	2700081O15Rik	ENSMUSG00000053080	0.202725	0.224976	0.500942	0.372404	0.0373576	0.11509	0.507085	0.000100932	0.00416902	0.221265	0.0531723	0.195081	0.152141	0.272169	0.482279	7.74272	7.6084	8.30952	8.03275	8.55904	8.29328	8.40272	8.18334	8.07359	7.97445
72647	2700089I24Rik	NA	NA	NA	NA	NA	NA	NA	NA	NA	NA	NA	NA	NA	0.706689	0.841496	NA	-2.40024	-2.40046	-2.39703	-2.39724	-2.39516	-2.39509	-2.39385	-2.39327	-2.38937	-2.39641
72658	2700097O09Rik	ENSMUSG00000062198	-0.060631	0.691516	0.855312	-0.172807	0.405411	0.552411	-0.0812411	0.753802	0.884309	0.233547	0.333378	0.607784	0.113146	0.52762	0.716185	6.40707	6.4401	6.23883	6.33495	5.89071	5.91915	6.15206	6.06379	6.44527	6.36796
77022	2700099C18Rik	NA	0.221343	0.126325	0.372495	0.0840961	0.546537	0.676432	0.20594	0.25568	0.529991	0.153758	0.528453	0.762024	-0.298236	0.206255	0.406335	8.01591	7.8462	7.91645	7.83782	7.42964	7.55407	6.78319	6.4285	6.29526	6.44363
66456	2810001G20Rik	NA	-0.0651473	0.701786	0.859588	-0.901201	0.000505034	0.0107894	0.22764	0.458481	0.70602	0.138256	0.615996	0.817472	-0.235125	0.448339	0.652186	6.13214	6.16705	5.42635	5.96065	5.6804	5.59162	5.66792	5.50736	5.47667	5.6559
66457	2810002D19Rik	NA	-0.256569	0.115488	0.356264	-0.149569	0.471172	0.612268	-0.204872	0.369025	0.63528	-0.265138	0.201941	0.462455	-0.244354	0.167648	0.357686	6.38324	6.53858	6.40848	6.47862	6.1117	6.17913	6.23513	6.45942	6.45186	6.60784
66523	2810004N23Rik	ENSMUSG00000031984	-0.0416683	0.667707	0.842038	-0.183946	0.213079	0.35354	-0.0798142	0.55786	0.770607	0.258609	0.0230562	0.109519	-0.01516	0.891336	0.947201	8.80598	8.82548	8.7304	8.82542	8.71739	8.68422	8.741	8.66288	8.8607	8.86682
72650	2810006K23Rik	ENSMUSG00000047635	0.0459368	0.703536	0.860599	0.0171039	0.913477	0.947119	0.00509777	0.983129	0.993672	0.330484	0.138035	0.366169	0.174093	0.278568	0.489135	7.23186	7.19451	6.79874	6.76848	6.03334	5.92549	6.27795	6.18928	6.80796	6.6903
100503178	2810013P06Rik	NA	-0.215504	0.124368	0.369641	-0.14675	0.473244	0.614352	-0.194638	0.490442	0.728159	0.225312	0.284022	0.558237	0.0481728	0.780511	0.88616	7.34586	7.49767	6.48282	6.55942	6.05832	6.00467	6.48136	6.50098	6.97967	6.94943
69944	2810021J22Rik	ENSMUSG00000020491	0.237353	0.124801	0.369903	0.268829	0.362609	0.511207	0.473492	0.0341165	0.187969	0.0562596	0.748066	0.8933	0.0107863	0.943446	0.972343	6.96199	6.79515	5.9368	5.75982	6.50001	6.14791	6.79453	6.83842	7.19536	7.18999
69953	2810025M15Rik	NA	-0.1468	0.412118	0.672723	-0.485553	0.0520004	0.140965	-0.151896	0.395005	0.656456	-0.41922	0.0918431	0.280945	-0.186127	0.5164	0.708225	7.50808	7.58594	7.3749	7.67151	7.08708	7.37875	6.64607	6.71402	6.09799	6.20523
100504687	2810029C07Rik	NA	-0.494869	0.359083	NA	1.17343	0.140788	NA	-0.112066	0.897715	NA	-1.34845	0.305336	NA	0.0954513	0.923896	NA	2.03559	2.27688	2.08617	1.6519	1.63436	1.82985	1.58204	1.74317	1.68355	1.65464
78335	2810030D12Rik	NA	-1.30216	0.571138	NA	NA	NA	NA	-0.819222	0.816674	NA	NA	NA	NA	NA	NA	NA	-2.10782	-2.05885	-2.12148	-2.12222	-2.11496	-2.08982	-2.11036	-2.10834	-2.11961	-2.1193
72669	2810032G03Rik	NA	0.734173	0.835418	NA	NA	NA	NA	-0.819222	0.816674	NA	NA	NA	NA	NA	NA	NA	-2.31997	-2.33372	-2.3273	-2.32769	-2.3238	-2.31032	-2.32133	-2.32025	-2.32629	-2.32613
72665	2810039B14Rik	NA	-0.300204	0.452652	0.703435	-0.0479762	0.937787	NA	-0.313236	0.648416	NA	-0.534731	0.462041	NA	-0.148984	0.817896	NA	3.15813	3.31413	2.60224	2.60615	2.7319	2.80794	2.54394	2.79974	2.74853	2.80792
72716	2810047C21Rik1	ENSMUSG00000092178	-0.688183	0.472103	NA	-2.14033	0.207546	NA	-0.584428	0.26201	NA	-0.906702	0.285678	NA	0.0443496	0.960748	NA	1.53552	1.76203	1.25858	1.64465	2.33006	2.79442	2.05407	2.31795	1.86069	1.81529
72677	2810049E08Rik	NA	NA	NA	NA	NA	NA	NA	NA	NA	NA	NA	NA	NA	NA	NA	NA	0	0	0	0	0	0	0	0	0	0
100504278	2810402E24Rik	NA	-0.282996	0.0830366	0.301289	-0.410536	0.107686	0.223724	0.074368	0.772469	0.894727	0.206621	0.377462	0.64878	-0.0176299	0.930185	0.965296	6.46823	6.65139	6.07991	6.31751	6.25702	6.16995	6.22206	6.11339	6.45596	6.45081
69964	2810403D21Rik	NA	-0.0166507	0.949387	0.977949	-0.843476	0.0247152	0.0898443	0.134962	0.74158	0.87807	-0.807182	0.212229	NA	0.818917	0.16236	0.35044	4.56047	4.56596	4.3403	4.8467	4.0179	4.04185	3.47653	3.69226	3.69247	3.30411
69966	2810404M03Rik	NA	NA	NA	NA	NA	NA	NA	NA	NA	NA	NA	NA	NA	NA	NA	NA	0	0	0	0	0	0	0	0	0	0
69974	2810405F15Rik	NA	NA	NA	NA	NA	NA	NA	NA	NA	NA	NA	NA	NA	NA	NA	NA	0	0	0	0	0	0	0	0	0	0
100039901	2810407A14Rik	NA	0.0128434	0.9971	NA	1.51632	0.456811	NA	-0.642591	0.815229	NA	NA	NA	NA	-0.735979	0.83502	NA	-1.7055	-1.70706	-1.53329	-1.68449	-1.66992	-1.61948	-1.71061	-1.70656	-1.72915	-1.67864
70419	2810408A11Rik	ENSMUSG00000018570	0.0629811	0.840439	0.930653	0.579872	0.17759	0.313109	0.263112	0.672205	NA	-1.26079	0.427184	NA	-0.758891	0.660167	NA	3.63068	3.5746	3.22613	2.88492	2.46352	2.55706	2.09289	2.02708	1.76377	1.86923
69941	2810408I11Rik	NA	-0.156969	0.481189	0.724665	-0.284815	0.32843	0.478154	-0.590435	0.0589476	0.252825	-0.22167	0.501441	0.7428	-0.719087	0.0484474	0.155873	5.37585	5.4723	5.5019	5.65823	5.32251	5.70821	4.95597	5.08525	4.50931	4.87843
100042332	2810410L24Rik	NA	-0.103935	0.721592	0.870171	-0.497878	0.61815	NA	0.00695012	0.991085	NA	-0.763653	0.305052	NA	1.25578	0.185818	NA	3.9808	4.06539	2.52747	2.76957	2.99659	3.09798	2.7388	2.9876	2.63913	2.2362
76937	2810429I04Rik	NA	0.128965	0.889315	NA	-0.725984	0.632778	NA	-1.56176	0.658179	NA	NA	NA	NA	NA	NA	NA	-0.314843	-0.355611	-0.638973	-0.525591	-0.869878	-0.7189	-0.857578	-0.852779	-0.881388	-0.880873
77132	2810433D01Rik	NA	NA	NA	NA	NA	NA	NA	0.623446	0.859961	NA	NA	NA	NA	NA	NA	NA	-2.40099	-2.40125	-2.39724	-2.39748	-2.38673	-2.39496	-2.39351	-2.39284	-2.39661	-2.39651
72753	2810442N19Rik	NA	-1.30626	0.612701	NA	0.715035	0.83965	NA	NA	NA	NA	-0.675316	0.848446	NA	NA	NA	NA	-2.03889	-1.97818	-2.025	-2.05675	-2.04775	-2.04742	-2.04205	-2.00871	-2.05351	-2.05314
72813	2810454H06Rik	NA	-0.28073	0.518015	0.748242	-0.498569	0.192691	0.330404	-0.266621	0.604545	0.799911	0.377296	0.659757	NA	-0.111951	0.852496	NA	3.22171	3.38862	3.61085	3.86985	3.21808	3.40904	2.88729	2.66815	3.008	3.03366
72792	2810459M11Rik	ENSMUSG00000026227	0.0128434	0.9971	NA	0.572055	0.864175	NA	NA	NA	NA	NA	NA	NA	NA	NA	NA	-2.10786	-2.1087	-2.06882	-2.09653	-2.11559	-2.1153	-2.11062	-2.10843	-2.12062	-2.12029
72834	2810468N07Rik	NA	1.3536	0.55215	NA	-0.637388	0.852722	NA	-0.819222	0.816674	NA	0.767352	0.828094	NA	0.706689	0.841496	NA	-1.67902	-1.77188	-1.74986	-1.7055	-1.78358	-1.73738	-1.72942	-1.77142	-1.74641	-1.79157
72818	2810471M01Rik	NA	NA	NA	NA	NA	NA	NA	-0.819222	0.816674	NA	NA	NA	NA	NA	NA	NA	-2.40073	-2.40097	-2.39716	-2.3974	-2.39509	-2.3871	-2.39363	-2.39299	-2.39657	-2.39647
67261	2900005J15Rik	NA	-0.137699	0.413477	0.673429	-0.149982	0.593276	0.714563	0.0661	0.853673	0.936223	0.621173	0.00876543	0.0535914	-0.00412773	0.984015	0.992677	7.20323	7.28479	5.51962	5.58684	5.62003	5.42988	6.34793	6.12273	6.9428	6.94958
100502745	2900009J06Rik	NA	0.734173	0.835418	NA	-0.544095	0.839184	NA	-0.700081	0.833929	NA	-0.675316	0.848446	NA	-1.359	0.698509	NA	-1.77186	-1.82177	-1.75005	-1.70308	-1.73735	-1.68843	-1.77681	-1.72448	-1.7948	-1.6974
67254	2900011O08Rik	ENSMUSG00000044117	0.0241848	0.994537	NA	0.504687	0.852933	NA	0.337712	0.27997	0.554525	0.340743	0.0574653	0.205139	0.28654	0.0839078	0.22793	2.78467	2.77717	2.91522	2.87031	5.33965	4.7327	6.06894	6.21386	6.3966	6.17842
243219	2900026A02Rik	ENSMUSG00000051339	0.0701268	0.594236	0.799244	0.11589	0.547403	0.676845	-0.183191	0.36581	0.633797	-0.323734	0.53224	0.764399	0.13419	0.550062	0.733574	8.57538	8.50672	8.60411	8.48751	6.6083	7.05482	5.75417	5.50767	7.05623	6.97343
78403	2900041M22Rik	NA	0.312646	0.658419	NA	-0.449309	0.659926	NA	0.506222	0.72929	NA	-0.675316	0.848446	NA	-0.750975	0.645292	NA	1.20048	1.04691	0.794012	0.888665	0.534516	0.560791	0.426992	0.384906	0.515839	0.58718
73040	2900052N01Rik	NA	0.0128434	0.9971	NA	-0.727633	0.836864	NA	NA	NA	NA	NA	NA	NA	NA	NA	NA	-2.24862	-2.24913	-2.25764	-2.24171	-2.25333	-2.25316	-2.2503	-2.24897	-2.2564	-2.2562
73001	2900055J20Rik	NA	-1.43528	0.357584	NA	-1.52926	0.30189	NA	-0.0653606	0.977638	NA	0.016917	0.992803	NA	-1.30107	0.711016	NA	-0.525965	-0.307834	-0.478982	-0.161035	-0.504515	-0.511657	-0.383179	-0.424135	-0.67554	-0.525962
73009	2900057B20Rik	NA	NA	NA	NA	NA	NA	NA	NA	NA	NA	NA	NA	NA	NA	NA	NA	0	0	0	0	0	0	0	0	0	0
68204	2900060B14Rik	NA	1.18144	0.207645	NA	-0.141516	0.822647	NA	1.83142	0.069587	NA	0.35726	0.677929	NA	0.0742526	0.934514	NA	1.74019	1.40526	2.12062	2.17563	1.99495	1.44633	1.99702	1.85204	1.93853	1.86199
100504421	2900076A07Rik	NA	-0.234533	0.115215	0.355721	-0.369519	0.255924	0.401752	0.228477	0.516288	0.745311	0.0444384	0.856655	0.941563	0.0237538	0.921244	0.960609	6.33202	6.48988	5.03832	5.21638	5.44429	5.17674	5.86959	5.97049	6.16484	6.1403
620760	2900079G21Rik	NA	-0.708495	0.841097	NA	NA	NA	NA	NA	NA	NA	NA	NA	NA	NA	NA	NA	-2.39915	-2.39394	-2.39673	-2.39689	-2.39532	-2.39526	-2.39432	-2.39389	-2.39632	-2.39626
73090	2900092C05Rik	ENSMUSG00000030385	NA	NA	NA	0.715035	0.83965	NA	NA	NA	NA	NA	NA	NA	NA	NA	NA	-2.39982	-2.40003	-2.39046	-2.39711	-2.39522	-2.39515	-2.39403	-2.3935	-2.39643	-2.39635
73100	2900092D14Rik	NA	-0.708495	0.841097	NA	NA	NA	NA	NA	NA	NA	NA	NA	NA	NA	NA	NA	-2.39915	-2.39394	-2.39673	-2.39689	-2.39532	-2.39526	-2.39432	-2.39389	-2.39632	-2.39626
347740	2900097C17Rik	NA	0.0416264	0.593795	0.798975	0.107688	0.329139	0.47879	0.0359629	0.706171	0.857725	0.0905143	0.236873	0.505675	-0.0596547	0.532957	0.7202	10.1669	10.1337	10.1767	10.0873	10.273	10.2235	10.3171	10.2908	10.3084	10.3452
378954	3000002C10Rik	NA	-0.0360948	0.894772	0.953468	-0.0671181	0.877208	0.92418	-0.209151	0.655247	0.828016	0.389881	0.3392	0.613453	0.0408255	0.879134	0.940574	4.75396	4.76312	4.07776	4.11005	4.12465	4.23018	4.51683	4.36173	4.98049	4.95991
75693	3010001F23Rik	NA	NA	NA	NA	NA	NA	NA	NA	NA	NA	0.767352	0.828094	NA	NA	NA	NA	-2.40143	-2.40171	-2.39736	-2.39762	-2.39499	-2.39489	-2.38429	-2.39259	-2.39668	-2.39657
109163	3010003L21Rik	NA	-0.138356	0.632047	0.821707	-0.0505593	0.874084	0.921596	-0.0573323	0.872446	0.945342	0.656178	0.296371	NA	-0.114538	0.807613	0.901078	4.41715	4.50897	4.19223	4.2122	3.97872	4.18142	3.79735	3.35744	3.70643	3.77211
73076	3100003L05Rik	NA	NA	NA	NA	NA	NA	NA	NA	NA	NA	NA	NA	NA	NA	NA	NA	0	0	0	0	0	0	0	0	0	0
73093	3110006O06Rik	NA	0.0598099	0.918104	NA	-0.014885	0.978577	NA	-0.82703	0.373493	NA	1.24155	0.480189	NA	0.00136331	0.998988	NA	2.1195	2.07317	2.31868	2.31181	1.56697	2.0424	1.71687	1.32176	1.5711	1.57597
73103	3110009E18Rik	ENSMUSG00000026388	-0.144463	0.56147	0.774834	-0.217729	0.399172	0.546157	0.00422682	0.981512	0.993198	0.439023	0.147434	0.381076	0.217888	0.506759	0.700775	5.50765	5.58157	5.75939	5.86042	6.61261	6.95215	5.91282	5.31435	5.21622	5.08642
67280	3110009F21Rik	NA	NA	NA	NA	NA	NA	NA	NA	NA	NA	NA	NA	NA	NA	NA	NA	0	0	0	0	0	0	0	0	0	0
73079	3110009M11Rik	NA	-0.708495	0.841097	NA	0.0086941	0.998035	NA	0.672358	0.759394	NA	-0.684744	0.803325	NA	NA	NA	NA	-1.75937	-1.70865	-1.68343	-1.68498	-1.61735	-1.61679	-1.60767	-1.60342	-1.73183	-1.7312
73129	3110015C05Rik	NA	NA	NA	NA	NA	NA	NA	NA	NA	NA	NA	NA	NA	NA	NA	NA	0	0	0	0	0	0	0	0	0	0
73160	3110018I06Rik	NA	NA	NA	NA	NA	NA	NA	NA	NA	NA	NA	NA	NA	NA	NA	NA	0	0	0	0	0	0	0	0	0	0
67289	3110021A11Rik	NA	0.130098	0.763107	0.891608	-0.380733	0.33207	0.481462	-0.11083	0.84887	NA	0.338917	0.676697	NA	0.665207	0.348883	NA	3.26973	3.17825	3.49887	3.72285	2.9253	3.00849	2.77883	2.61032	2.81917	2.57621
73144	3110039I08Rik	ENSMUSG00000074415	NA	NA	NA	NA	NA	NA	NA	NA	NA	NA	NA	NA	NA	NA	NA	0	0	0	0	0	0	0	0	0	0
67293	3110039M20Rik	NA	NA	NA	NA	NA	NA	NA	NA	NA	NA	NA	NA	NA	NA	NA	NA	0	0	0	0	0	0	0	0	0	0
73176	3110040M04Rik	ENSMUSG00000114582	NA	NA	NA	NA	NA	NA	NA	NA	NA	NA	NA	NA	NA	NA	NA	0	0	0	0	0	0	0	0	0	0
67290	3110040N11Rik	ENSMUSG00000025102	-0.10118	0.420823	0.679425	-0.342255	0.134732	0.259914	0.00115034	0.994924	0.998063	0.267269	0.0813023	0.258561	-0.024642	0.869176	0.936283	8.05058	8.11256	7.85139	8.03593	7.85269	7.86594	7.85999	7.68782	7.91295	7.93393
67303	3110045C21Rik	NA	-0.155909	0.675344	0.846588	-1.36998	0.00679562	NA	-0.339525	0.650636	NA	0.112836	0.815005	0.923308	-0.364264	0.427705	0.634404	3.65167	3.72981	3.0259	3.67197	3.20236	3.13406	3.44526	3.63925	3.70186	3.93766
382686	3110053B16Rik	NA	0.0120584	0.984465	NA	0.233066	0.743463	NA	-0.301897	0.794263	NA	-1.20311	0.42428	NA	0.0271918	0.980319	NA	1.93307	1.90742	1.79239	1.68584	1.40562	1.52831	1.23236	1.45123	1.40113	1.42469
73204	3110056K07Rik	NA	0.0800674	0.593019	0.798592	0.101863	0.570571	0.695496	0.318853	0.0867758	0.305069	-0.0155105	0.931119	0.974384	-0.0743557	0.658588	0.809462	6.79242	6.73284	6.66961	6.58635	6.84408	6.61227	7.00248	7.04931	6.84328	6.89071
67304	3110070M22Rik	NA	-0.371314	0.492032	NA	-0.64821	0.389784	NA	1.1752	0.318387	NA	1.75566	0.194479	NA	0.564133	0.408991	NA	2.21422	2.39441	1.84701	2.0648	2.12243	1.56394	1.61156	1.49879	2.30226	2.01038
73212	3110082I17Rik	ENSMUSG00000053553	0.014277	0.888878	0.950616	-0.192848	0.107201	0.223263	-0.0757501	0.592716	0.792213	0.0138835	0.923496	0.971278	0.426368	0.0140246	0.0662007	9.00651	8.98796	8.91941	9.0289	8.51009	8.74651	8.28422	8.09331	8.59011	8.31967
433868	3110082J24Rik	ENSMUSG00000086815	NA	NA	NA	NA	NA	NA	NA	NA	NA	NA	NA	NA	NA	NA	NA	0	0	0	0	0	0	0	0	0	0
100043232	3110099E03Rik	NA	NA	NA	NA	NA	NA	NA	NA	NA	NA	NA	NA	NA	NA	NA	NA	0	0	0	0	0	0	0	0	0	0
71818	3200001D21Rik	NA	-0.116351	0.857005	0.937796	-0.391484	0.489636	NA	-0.674264	0.432015	NA	0.127959	0.890812	NA	-0.320672	0.611524	NA	2.51716	2.65984	2.40964	2.57802	2.26313	2.31927	2.0447	2.15053	2.42407	2.58347
100503812	3300002A11Rik	NA	0.734173	0.835418	NA	1.44571	0.682199	NA	-0.819222	0.816674	NA	0.767352	0.828094	NA	-0.01464	0.996694	NA	-1.97145	-2.01073	-1.91621	-1.99351	-1.98239	-1.94389	-1.93726	-1.97226	-1.95142	-1.95096
69277	3300002I08Rik	ENSMUSG00000063364	-0.42904	0.463792	NA	0.00985492	0.98772	NA	-0.328637	0.677983	NA	0.671826	0.410031	NA	0.16941	0.847366	NA	2.26486	2.45175	2.25446	2.22828	2.10976	2.17651	2.23334	2.04501	1.98566	1.94342
78512	3300005D01Rik	NA	0.473093	0.0297533	0.17338	0.125052	0.681729	0.784744	0.338454	0.436424	0.690042	0.531615	0.580475	NA	0.598405	0.451137	NA	4.95168	4.62183	4.38147	4.28025	3.88888	4.08852	3.54372	2.98748	3.06864	2.88978
100504518	3425401B19Rik	ENSMUSG00000071540	NA	NA	NA	NA	NA	NA	-1.14036	0.43216	NA	0.767352	0.828094	NA	-0.735979	0.83502	NA	-1.76247	-1.76417	-1.73802	-1.73963	-1.561	-1.39761	-1.6595	-1.70936	-1.73393	-1.67901
320606	3632454L22Rik	NA	0.411492	0.580585	NA	1.13787	0.377996	NA	1.77428	0.26754	NA	0.825197	0.610394	NA	2.80549	0.0434679	NA	1.44967	1.20381	0.931527	0.648326	0.950399	0.580758	0.739044	0.687181	1.17717	0.555639
70691	3830403N18Rik	ENSMUSG00000031125	0.679079	0.160516	0.420929	0.37509	0.486746	0.625984	0.419861	0.348408	0.619263	0.525874	0.277112	0.5494	0.297529	0.54067	0.726452	5.15332	4.87642	5.31595	5.23423	5.37276	5.16575	5.18012	5.04732	5.09812	5.07396
218734	3830406C13Rik	ENSMUSG00000033111 /// ENSMUSG00000114378	-0.0215362	0.791112	0.907431	-0.243461	0.037012	0.114574	-0.199167	0.0830806	0.300498	-0.0461182	0.665269	0.849583	0.0432414	0.656643	0.80767	9.14516	9.15319	8.95377	9.08903	9.0995	9.1463	9.25502	9.37936	9.40718	9.37249
100040322	3830408C21Rik	NA	-0.121907	0.730907	0.874113	0.227481	0.707353	NA	0.459993	0.637859	NA	-0.291683	0.735956	NA	0.206583	0.767722	NA	3.32785	3.39011	2.58644	2.47382	2.14993	2.1465	2.42707	2.41702	2.48383	2.39716
70696	3830417A13Rik	ENSMUSG00000031179	NA	NA	NA	NA	NA	NA	NA	NA	NA	NA	NA	NA	NA	NA	NA	0	0	0	0	0	0	0	0	0	0
665306	3930402G23Rik	NA	-0.708495	0.841097	NA	-0.727633	0.836864	NA	NA	NA	NA	NA	NA	NA	NA	NA	NA	-2.33195	-2.32085	-2.32679	-2.31567	-2.32378	-2.32366	-2.32166	-2.32073	-2.32592	-2.32578
381218	4430402I18Rik	ENSMUSG00000064202	0.140139	0.727777	0.872807	0.0164023	0.974632	NA	-0.0653162	0.92781	NA	0.141165	0.879102	NA	-0.497565	0.585797	NA	3.08841	3.0052	2.90507	2.88496	2.39037	2.53203	2.4345	2.27351	2.14569	2.33485
109292	4631423B10Rik	NA	-0.15056	0.693304	0.856107	-1.52825	0.207611	NA	0.830609	0.68349	NA	0.98687	0.45918	NA	0.459747	0.506021	NA	2.99255	3.0539	1.36386	1.68278	1.39684	1.29549	1.72198	1.51411	2.21214	2.01256
78263	4632411P08Rik	NA	0.597601	0.601647	NA	-0.71421	0.690363	NA	-1.64543	0.285837	NA	-1.89487	0.146346	NA	-0.842134	0.395462	NA	0.759731	0.627334	0.617898	0.612927	0.754647	0.865862	0.510397	1.196	0.812455	1.11015
70808	4632415L05Rik	NA	0.0650515	0.595305	0.800143	0.290078	0.178013	0.313546	0.105722	0.306131	0.581301	-0.0257714	0.790426	0.912053	0.0590074	0.624102	0.787376	8.47401	8.42798	7.25076	7.10292	9.22585	9.15523	9.20893	9.23276	8.98948	8.94691
666737	4632427E13Rik	NA	-0.243762	0.634605	NA	-0.0744044	0.865328	0.915803	0.5075	0.342562	0.614292	0.73472	0.188554	0.444185	-0.082039	0.869165	0.936283	3.0492	3.1438	3.59175	3.62846	3.4637	3.26665	3.65953	3.18422	3.33534	3.38366
100043102	4632428C04Rik	NA	1.63581	0.0718973	NA	1.16323	0.210424	NA	0.0696724	0.973871	NA	NA	NA	NA	0.422306	0.802122	NA	0.959211	0.330066	0.781776	0.381502	0.050456	0.132537	0.125204	0.00123271	0.236868	0.183609
74576	4731417B20Rik	NA	NA	NA	NA	NA	NA	NA	NA	NA	NA	NA	NA	NA	NA	NA	NA	0	0	0	0	0	0	0	0	0	0
320737	4732416N19Rik	NA	-0.0890449	0.922727	NA	-2.12466	0.359034	NA	0.122335	0.953997	NA	-0.0973295	0.96838	NA	0.616073	0.849338	NA	0.169061	0.245987	-0.364778	-0.126099	-0.350257	-0.228356	-0.0747958	-0.245089	-0.301324	-0.360621
654804	4732471J01Rik	NA	-0.0745605	0.905167	NA	-0.177197	0.807937	NA	-0.0971254	0.940963	NA	2.84526	0.0769451	NA	-0.129746	0.863668	NA	2.03901	2.03727	1.93712	1.95353	1.50926	1.36686	1.45863	1.15521	1.8442	1.89343
319871	4732490B19Rik	NA	1.30565	0.710156	NA	-1.71026	0.482669	NA	NA	NA	NA	-0.675316	0.848446	NA	-0.0214085	0.995164	NA	-1.72422	-1.81928	-1.74994	-1.61092	-1.78446	-1.78396	-1.77581	-1.72521	-1.7464	-1.74584
224523	4732491K20Rik	NA	-0.316666	0.24775	0.522324	-0.333222	0.35545	0.504298	-0.317835	0.614172	NA	-0.24878	0.680919	0.858777	0.00866487	0.980388	0.991072	4.55186	4.7536	4.15185	4.32927	3.46128	3.44974	3.4417	3.75233	4.2817	4.26114
320798	4831440D22Rik	NA	0.226151	0.478317	0.722824	-0.346652	0.347339	0.496842	-0.240889	0.624169	0.810889	0.796776	0.124662	0.343742	-0.421576	0.439116	0.643995	4.28049	4.13168	4.08273	4.24516	3.87311	3.96357	3.9612	3.58443	3.587	3.79376
320965	4831440E17Rik	NA	0.240046	0.312381	0.586575	0.401941	0.511087	NA	0.452382	0.528183	NA	0.679201	0.277328	NA	-0.106679	0.80224	0.897894	4.65286	4.48117	3.19582	3.02197	3.26319	2.97185	3.38199	3.11018	3.60057	3.66494
71624	4833411C07Rik	NA	-0.849163	0.684467	NA	-0.703356	0.797815	NA	-0.600446	0.828189	NA	NA	NA	NA	-0.735979	0.83502	NA	-1.55012	-1.46787	-1.57875	-1.52738	-1.6178	-1.51136	-1.55508	-1.60372	-1.62769	-1.57411
73904	4833412C05Rik	NA	NA	NA	NA	NA	NA	NA	NA	NA	NA	NA	NA	NA	NA	NA	NA	0	0	0	0	0	0	0	0	0	0
73906	4833417C18Rik	NA	-0.317805	0.272847	0.547807	-0.526813	0.163582	0.295327	-0.0121773	0.987617	NA	0.697441	0.257544	0.529911	-0.00359226	0.990422	0.994845	4.19129	4.38514	3.84972	4.13401	3.16536	3.04404	3.52994	3.33103	4.5258	4.53436
74597	4833418N02Rik	NA	0.374202	0.18762	0.45553	0.628199	0.0203538	0.0804635	0.652446	0.206672	0.47533	-0.856538	0.385098	NA	0.502568	0.433167	NA	4.39778	4.13698	4.73108	4.3023	3.45377	3.38197	3.09888	3.02728	3.42269	3.13005
73915	4833419F23Rik	NA	-0.171909	0.526818	0.753813	-0.173775	0.547185	0.676778	-0.362052	0.086712	0.305069	-0.118393	0.478206	0.727303	-0.558256	0.00744039	0.0426564	5.71487	5.80208	6.06235	6.14148	6.43568	6.49356	6.4812	6.75769	5.94542	6.28704
67392	4833420G17Rik	ENSMUSG00000062822	0.0344007	0.68889	0.854253	0.067898	0.463825	0.605432	0.140057	0.264728	0.54032	0.202124	0.0486417	0.183608	0.0443197	0.625506	0.788334	10.0005	9.9679	9.78973	9.7245	9.18337	9.14232	9.22811	9.0654	9.41297	9.38004
373852	4833422C13Rik	NA	-0.824643	0.781445	NA	0.0224169	0.994934	NA	0.623446	0.859961	NA	0.767352	0.828094	NA	NA	NA	NA	-1.90334	-1.82701	-1.88588	-1.88703	-1.87571	-1.91406	-1.86854	-1.90417	-1.92172	-1.92125
228151	4833423E24Rik	ENSMUSG00000075217	NA	NA	NA	NA	NA	NA	NA	NA	NA	NA	NA	NA	NA	NA	NA	0	0	0	0	0	0	0	0	0	0
100504504	4833423F13Rik	NA	-0.173884	0.523743	0.751849	0.609479	0.482796	NA	0.654241	0.814825	NA	NA	NA	NA	2.30171	0.353743	NA	3.89465	4.0238	1.71805	1.48844	1.04596	1.04651	1.07311	1.01456	1.21323	0.940001
74601	4833427F10Rik	NA	-1.94786	0.479877	NA	0.882715	0.491818	NA	-0.687239	0.665424	NA	1.38464	0.341233	NA	0.851011	0.456459	NA	-0.159357	0.0271312	0.316338	0.13628	0.308058	0.237302	0.245149	0.146121	0.555926	0.266323
235345	4833427G06Rik	ENSMUSG00000032057	NA	NA	NA	-0.727633	0.836864	NA	NA	NA	NA	NA	NA	NA	NA	NA	NA	-2.40033	-2.40056	-2.39706	-2.39	-2.39515	-2.39507	-2.3938	-2.39321	-2.39651	-2.39642
74602	4833428L15Rik	NA	NA	NA	NA	NA	NA	NA	-0.819222	0.816674	NA	NA	NA	NA	NA	NA	NA	-2.40081	-2.40107	-2.39719	-2.39743	-2.39508	-2.38694	-2.39359	-2.39294	-2.39658	-2.39648
100503871	4833432E10Rik	NA	0.401128	0.106874	0.343236	-0.0282568	0.945932	0.967075	0.327178	0.391465	0.653246	-0.0613354	0.900558	0.962224	0.145577	0.731901	0.855852	4.83024	4.55703	3.86815	3.86037	4.04505	4.00832	3.97957	3.87216	3.93471	3.84993
100503392	4833438C02Rik	NA	-0.138145	0.206884	0.479745	-0.0590595	0.707243	0.804224	-0.0486488	0.701278	0.855199	-0.0762919	0.569367	0.787724	-0.0625102	0.69738	0.834687	8.21195	8.28958	8.97675	8.99958	8.97767	9.03411	8.92556	8.95534	8.57257	8.60126
97820	4833439L19Rik	ENSMUSG00000025871	0.0685434	0.324125	0.597057	0.0785033	0.43699	0.580551	0.0593272	0.576902	0.781061	0.123492	0.107906	0.313074	0.159422	0.0368148	0.128411	10.4264	10.3766	10.5274	10.4571	10.8501	10.7442	10.9322	10.9214	10.9359	10.8245
74042	4921501E09Rik	ENSMUSG00000023350	NA	NA	NA	NA	NA	NA	NA	NA	NA	NA	NA	NA	NA	NA	NA	0	0	0	0	0	0	0	0	0	0
70832	4921504A21Rik	NA	-0.708495	0.841097	NA	NA	NA	NA	NA	NA	NA	NA	NA	NA	NA	NA	NA	-2.39922	-2.3939	-2.39675	-2.39691	-2.39531	-2.39525	-2.39429	-2.39385	-2.39633	-2.39627
70909	4921504E06Rik	ENSMUSG00000026734	NA	NA	NA	NA	NA	NA	-0.819222	0.816674	NA	-0.675316	0.848446	NA	NA	NA	NA	-2.33528	-2.33578	-2.32804	-2.32851	-2.32382	-2.30758	-2.32085	-2.30347	-2.32683	-2.32663
66709	4921507G05Rik	ENSMUSG00000094149	0.0863237	0.814227	0.919226	-0.268566	0.680202	NA	1.00624	0.391893	NA	0.935002	0.489274	NA	0.577924	0.523843	NA	3.19491	3.132	2.45944	2.70613	2.00917	1.71948	1.81389	1.70828	2.0884	1.91055
70821	4921507P07Rik	ENSMUSG00000029828	0.464548	0.481731	NA	-1.13249	0.312983	NA	0.501589	0.828387	NA	-1.20084	0.402852	NA	-0.347032	0.796304	NA	1.40179	1.18662	0.689672	0.964299	0.738716	0.548156	0.583404	0.923518	0.744486	0.835223
70845	4921508D12Rik	NA	NA	NA	NA	NA	NA	NA	NA	NA	NA	NA	NA	NA	0.706689	0.841496	NA	-2.40008	-2.4003	-2.39699	-2.39719	-2.39518	-2.39511	-2.39391	-2.39336	-2.38959	-2.39638
381393	4921509C19Rik	ENSMUSG00000061525	NA	NA	NA	0.715035	0.83965	NA	NA	NA	NA	0.767352	0.828094	NA	NA	NA	NA	-2.33409	-2.33454	-2.31316	-2.32802	-2.32381	-2.32365	-2.30671	-2.31997	-2.3265	-2.32633
70917	4921509O07Rik	NA	0.734173	0.835418	NA	-1.14532	0.395074	NA	-2.66657	0.250081	NA	0.280475	0.838929	NA	0.155625	0.912691	NA	-0.429604	-0.498952	-0.253324	-0.016964	-0.37409	-0.107756	-0.108075	-0.0460558	-0.0697649	-0.121037
70924	4921511C10Rik	NA	1.58806	0.15224	NA	0.715035	0.83965	NA	-0.748917	0.786317	NA	0.925835	0.522346	NA	1.98827	0.15815	NA	0.362363	-0.0624277	-0.246218	-0.319752	-0.142095	-0.148277	0.109438	0.0227371	0.315329	-0.107766
245598	4921511C20Rik	NA	NA	NA	NA	NA	NA	NA	NA	NA	NA	NA	NA	NA	NA	NA	NA	0	0	0	0	0	0	0	0	0	0
70858	4921511I17Rik	NA	-0.316068	0.859583	NA	0.455165	0.75433	NA	0.707301	0.323429	NA	-0.905205	0.214782	NA	-0.290185	0.749774	NA	0.984817	1.0379	1.33631	1.14815	2.0175	1.74281	1.86217	2.26814	1.45416	1.54582
667256	4921511M17Rik	ENSMUSG00000094577	NA	NA	NA	NA	NA	NA	NA	NA	NA	NA	NA	NA	NA	NA	NA	0	0	0	0	0	0	0	0	0	0
100504457	4921513H07Rik	NA	NA	NA	NA	NA	NA	NA	NA	NA	NA	NA	NA	NA	NA	NA	NA	0	0	0	0	0	0	0	0	0	0
70874	4921513I03Rik	NA	-0.708495	0.841097	NA	NA	NA	NA	NA	NA	NA	NA	NA	NA	NA	NA	NA	-2.39915	-2.39394	-2.39673	-2.39689	-2.39532	-2.39526	-2.39432	-2.39389	-2.39632	-2.39626
70886	4921515E04Rik	NA	NA	NA	NA	NA	NA	NA	NA	NA	NA	NA	NA	NA	NA	NA	NA	0	0	0	0	0	0	0	0	0	0
70900	4921517D22Rik	ENSMUSG00000049902	-1.50092	0.479984	NA	-1.29589	0.712184	NA	2.19238	0.383977	NA	0.0233727	0.990715	NA	0.548754	0.840723	NA	-1.18049	-1.00272	-1.22391	-1.08691	-0.858698	-1.20424	-1.0494	-0.971821	-1.07559	-1.14794
66719	4921522P10Rik	ENSMUSG00000095758	-0.384549	0.801269	NA	0.370095	0.784049	NA	-1.84252	0.332822	NA	1.55128	0.502324	NA	0.296861	0.869069	NA	-0.237802	-0.195601	-0.0773315	-0.149111	-0.317362	-0.0443797	-0.157242	-0.348345	-0.183232	-0.252402
66714	4921524J17Rik	ENSMUSG00000036934	-0.0552995	0.609704	0.809054	0.0814887	0.498689	0.63609	-0.128684	0.273882	0.549071	0.159188	0.190056	0.445711	0.0184019	0.886651	0.944952	8.18081	8.20968	7.87333	7.80523	8.47399	8.60156	8.32329	8.19124	8.0858	8.07285
70901	4921524L21Rik	ENSMUSG00000039540	NA	NA	NA	NA	NA	NA	NA	NA	NA	NA	NA	NA	NA	NA	NA	0	0	0	0	0	0	0	0	0	0
74050	4921525O09Rik	NA	NA	NA	NA	NA	NA	NA	NA	NA	NA	NA	NA	NA	0.706689	0.841496	NA	-2.40007	-2.40028	-2.39698	-2.39719	-2.39519	-2.39511	-2.39392	-2.39336	-2.38962	-2.39638
77049	4921528I07Rik	ENSMUSG00000064299	0.794195	0.577317	NA	1.92889	0.315583	NA	1.33942	0.704438	NA	-0.675316	0.848446	NA	NA	NA	NA	-0.938259	-1.09182	-0.987901	-1.23169	-1.14653	-1.27825	-1.26663	-1.19445	-1.29144	-1.29063
66732	4921530L21Rik	ENSMUSG00000034689	NA	NA	NA	NA	NA	NA	NA	NA	NA	NA	NA	NA	NA	NA	NA	0	0	0	0	0	0	0	0	0	0
66730	4921531C22Rik	NA	0.275358	0.173675	0.43852	0.0458028	0.869723	0.918659	-0.190484	0.539689	0.759892	-0.33679	0.301854	0.576698	0.0754458	0.763911	0.874698	5.68313	5.49474	5.49298	5.4249	5.15273	5.22242	4.96809	5.19957	5.50145	5.46066
70960	4921531P14Rik	NA	NA	NA	NA	NA	NA	NA	NA	NA	NA	NA	NA	NA	NA	NA	NA	0	0	0	0	0	0	0	0	0	0
664619	4921533I20Rik	NA	NA	NA	NA	NA	NA	NA	NA	NA	NA	NA	NA	NA	0.706689	0.841496	NA	-2.40007	-2.40028	-2.39698	-2.39719	-2.39519	-2.39511	-2.39392	-2.39336	-2.38962	-2.39638
67430	4921536K21Rik	ENSMUSG00000020434	0.805081	0.026956	0.164838	0.275643	0.456287	0.598184	-0.344173	0.662254	NA	0.400756	0.613037	NA	-0.0193477	0.962006	0.981123	3.90346	3.42726	3.82973	3.6441	2.80529	2.89759	2.9685	2.85529	3.63428	3.64037
70941	4921539E11Rik	ENSMUSG00000028520	-1.24885	0.722196	NA	NA	NA	NA	NA	NA	NA	0.767352	0.828094	NA	NA	NA	NA	-2.2661	-2.23122	-2.25812	-2.25864	-2.25347	-2.25328	-2.23248	-2.24876	-2.25678	-2.25657
381816	4922502D21Rik	ENSMUSG00000047720	NA	NA	NA	NA	NA	NA	NA	NA	NA	-0.675316	0.848446	NA	NA	NA	NA	-2.40139	-2.40167	-2.39735	-2.39761	-2.39499	-2.3949	-2.39334	-2.38363	-2.39667	-2.39656
78136	4922502H24Rik	NA	NA	NA	NA	NA	NA	NA	NA	NA	NA	NA	NA	NA	NA	NA	NA	0	0	0	0	0	0	0	0	0	0
70962	4922502N22Rik	NA	-0.708495	0.841097	NA	NA	NA	NA	NA	NA	NA	NA	NA	NA	NA	NA	NA	-2.39903	-2.39401	-2.3967	-2.39685	-2.39534	-2.39528	-2.39438	-2.39396	-2.3963	-2.39624
73803	4930401C15Rik	NA	NA	NA	NA	NA	NA	NA	NA	NA	NA	NA	NA	NA	NA	NA	NA	0	0	0	0	0	0	0	0	0	0
73816	4930401O10Rik	NA	NA	NA	NA	NA	NA	NA	NA	NA	NA	NA	NA	NA	NA	NA	NA	0	0	0	0	0	0	0	0	0	0
73924	4930401O12Rik	NA	NA	NA	NA	NA	NA	NA	NA	NA	NA	NA	NA	NA	NA	NA	NA	0	0	0	0	0	0	0	0	0	0
74854	4930402F06Rik	ENSMUSG00000079421	-0.0054032	0.998779	NA	-0.00629435	0.998579	NA	0.623446	0.859961	NA	NA	NA	NA	-0.01464	0.996694	NA	-1.97122	-1.97238	-1.95453	-1.95562	-1.94481	-1.98147	-1.97502	-1.97201	-1.95173	-1.95128
73796	4930402F11Rik	NA	NA	NA	NA	NA	NA	NA	NA	NA	NA	NA	NA	NA	NA	NA	NA	0	0	0	0	0	0	0	0	0	0
228602	4930402H24Rik	ENSMUSG00000027309	0.225812	0.0247743	0.157433	0.409499	0.0167714	0.0726349	0.280165	0.0299729	0.177175	-0.0139569	0.893466	0.959554	0.186187	0.112063	0.277122	9.49271	9.35144	9.63784	9.36952	9.79939	9.45546	10.1159	10.3021	9.89231	9.77066
75775	4930402K13Rik	ENSMUSG00000045797	NA	NA	NA	NA	NA	NA	NA	NA	NA	NA	NA	NA	NA	NA	NA	0	0	0	0	0	0	0	0	0	0
73820	4930404A05Rik	NA	NA	NA	NA	NA	NA	NA	NA	NA	NA	NA	NA	NA	NA	NA	NA	0	0	0	0	0	0	0	0	0	0
73815	4930404H11Rik	NA	NA	NA	NA	0.151678	0.952162	NA	NA	NA	NA	NA	NA	NA	0.706689	0.841496	NA	-2.13723	-2.13814	-2.06539	-2.06626	-2.11633	-2.11602	-2.11091	-2.10853	-2.09249	-2.12145
67394	4930404I05Rik	NA	0.324874	0.287846	0.56306	0.814738	0.0988313	0.211719	0.533053	0.0543002	0.24095	0.169793	0.614192	0.816929	0.624072	0.0339321	0.121792	5.11263	4.88783	4.86437	4.31864	5.48175	5.27922	5.3716	5.07925	5.14424	4.77689
432479	4930404N11Rik	ENSMUSG00000020234	0.126492	0.116121	0.357683	0.0110272	0.869904	0.918756	-0.258452	0.0541284	0.240381	-0.420847	3.57969e-07	1.32599e-05	-0.282432	0.000880739	0.00862065	11.4479	11.3513	11.0215	10.9954	10.1618	10.1472	10.5512	11.0058	11.0944	11.2829
74896	4930405A10Rik	NA	0.0128434	0.9971	NA	NA	NA	NA	1.3767	0.696391	NA	0.0124935	0.997094	NA	0.805673	0.705178	NA	-1.58869	-1.58916	-1.61883	-1.62053	-1.54657	-1.6032	-1.47875	-1.53135	-1.3357	-1.49933
74846	4930405A21Rik	NA	0.106389	0.834407	0.927503	0.552947	0.191228	0.328945	0.297518	0.367304	0.634955	0.0268114	0.946352	0.980426	-0.549458	0.261202	0.469845	3.40816	3.38152	3.81432	3.51108	4.34315	4.2613	4.18731	4.08741	3.54526	3.83891
73922	4930405D11Rik	NA	NA	NA	NA	NA	NA	NA	NA	NA	NA	NA	NA	NA	NA	NA	NA	0	0	0	0	0	0	0	0	0	0
73811	4930405J17Rik	NA	NA	NA	NA	NA	NA	NA	0.623446	0.859961	NA	NA	NA	NA	NA	NA	NA	-2.40042	-2.40065	-2.39708	-2.3973	-2.38773	-2.39506	-2.39377	-2.39317	-2.39652	-2.39643
414079	4930405O22Rik	NA	0.318901	0.751066	NA	0.0229372	0.97973	NA	-1.04389	0.376698	NA	2.59325	0.151471	NA	-0.0397729	0.97004	NA	0.913314	0.814574	1.1169	1.09941	0.702195	1.04978	0.998727	0.559064	0.921627	0.931687
73806	4930406D18Rik	NA	NA	NA	NA	NA	NA	NA	NA	NA	NA	NA	NA	NA	NA	NA	NA	0	0	0	0	0	0	0	0	0	0
328573	4930407I10Rik	ENSMUSG00000075524	NA	NA	NA	0.715035	0.83965	NA	NA	NA	NA	NA	NA	NA	-0.735979	0.83502	NA	-2.33333	-2.33375	-2.31393	-2.3277	-2.3238	-2.32365	-2.32133	-2.32024	-2.3263	-2.31276
73938	4930412B13Rik	NA	NA	NA	NA	NA	NA	NA	NA	NA	NA	-1.37853	0.695025	NA	0.706689	0.841496	NA	-2.26916	-2.26983	-2.2595	-2.26014	-2.25388	-2.25365	-2.24992	-2.20531	-2.23645	-2.25762
320152	4930412C18Rik	NA	-0.14699	0.60572	0.806716	-0.286529	0.469422	0.61086	-0.530291	0.5831	NA	-1.29685	0.141864	NA	0.149028	0.882544	NA	3.93264	4.02382	3.3383	3.49495	2.4638	2.49559	2.25217	2.84735	2.36715	2.30918
100504140	4930412M03Rik	NA	-0.236337	0.729209	NA	0.967055	0.291327	NA	-0.872364	0.539285	NA	2.19293	0.167965	NA	0.418011	0.664982	NA	1.59099	1.64311	1.50723	1.15582	1.13295	1.16389	1.14988	0.900782	1.43689	1.25659
381347	4930412O13Rik	NA	-1.27044	0.717505	NA	NA	NA	NA	NA	NA	NA	NA	NA	NA	-0.735979	0.83502	NA	-2.26522	-2.23245	-2.25772	-2.25822	-2.25336	-2.25318	-2.25028	-2.24893	-2.25647	-2.23962
74627	4930413E15Rik	NA	NA	NA	NA	NA	NA	NA	NA	NA	NA	NA	NA	NA	NA	NA	NA	0	0	0	0	0	0	0	0	0	0
71637	4930413F20Rik	NA	NA	NA	NA	NA	NA	NA	NA	NA	NA	NA	NA	NA	NA	NA	NA	0	0	0	0	0	0	0	0	0	0
73951	4930413G21Rik	NA	-0.224115	0.152021	0.409309	-0.341739	0.00416766	0.0340804	-0.101658	0.514295	0.743871	-0.154344	0.42779	0.69018	-0.257508	0.157938	0.344318	7.57421	7.71389	7.76426	7.97791	7.66115	7.84395	7.49435	7.48435	7.3858	7.53306
73889	4930413M19Rik	NA	NA	NA	NA	NA	NA	NA	NA	NA	NA	NA	NA	NA	NA	NA	NA	0	0	0	0	0	0	0	0	0	0
73894	4930414N06Rik	NA	-0.199175	0.907373	NA	2.2781	0.353941	NA	NA	NA	NA	2.01696	0.446505	NA	-0.96457	0.596967	NA	-0.977681	-0.95842	-0.926355	-1.1961	-1.17508	-1.1743	-0.945642	-1.15592	-1.04642	-0.913362
245511	4930415L06Rik	ENSMUSG00000035387	NA	NA	NA	NA	NA	NA	NA	NA	NA	NA	NA	NA	NA	NA	NA	0	0	0	0	0	0	0	0	0	0
73863	4930415O20Rik	ENSMUSG00000022993	-0.528275	0.808766	NA	-1.62751	0.624773	NA	1.15364	0.653318	NA	1.33884	0.702932	NA	-0.735979	0.83502	NA	-1.41302	-1.3641	-1.50375	-1.32875	-1.24567	-1.42667	-1.41613	-1.47176	-1.49918	-1.43789
73870	4930417O13Rik	NA	1.12329	0.554254	NA	0.134661	0.950469	NA	-0.819222	0.816674	NA	1.31662	0.707731	NA	2.01648	0.319546	NA	-1.08654	-1.19589	-1.16061	-1.16278	-1.27699	-1.20851	-1.13048	-1.25897	-0.976353	-1.22107
73887	4930417O22Rik	NA	0.734173	0.835418	NA	0.715035	0.83965	NA	NA	NA	NA	0.688309	0.818254	NA	NA	NA	NA	-2.10797	-2.14074	-2.09365	-2.12637	-2.05354	-2.11675	-2.11122	-2.07686	-2.12303	-2.12264
73874	4930419G24Rik	NA	NA	NA	NA	NA	NA	NA	NA	NA	NA	NA	NA	NA	NA	NA	NA	0	0	0	0	0	0	0	0	0	0
78924	4930420G21Rik	NA	NA	NA	NA	NA	NA	NA	NA	NA	NA	NA	NA	NA	NA	NA	NA	0	0	0	0	0	0	0	0	0	0
195712	4930421P07Rik	NA	NA	NA	NA	NA	NA	NA	NA	NA	NA	0.767352	0.828094	NA	NA	NA	NA	-2.40103	-2.40129	-2.39725	-2.3975	-2.39505	-2.39496	-2.3851	-2.39281	-2.39661	-2.39651
73872	4930423M02Rik	NA	NA	NA	NA	-1.34475	0.701572	NA	NA	NA	NA	-1.24787	0.722459	NA	NA	NA	NA	-2.20486	-2.20572	-2.19242	-2.13802	-2.18518	-2.18488	-2.18008	-2.12262	-2.19034	-2.19
73865	4930425K10Rik	NA	-1.44807	0.681728	NA	-0.727633	0.836864	NA	NA	NA	NA	NA	NA	NA	NA	NA	NA	-2.26506	-2.23268	-2.25765	-2.24169	-2.25334	-2.25316	-2.2503	-2.24896	-2.25641	-2.25621
74635	4930425O10Rik	NA	NA	NA	NA	NA	NA	NA	NA	NA	NA	NA	NA	NA	NA	NA	NA	0	0	0	0	0	0	0	0	0	0
100504512	4930426I24Rik	NA	-0.000305272	0.99967	NA	-0.46287	0.693967	NA	-0.0978839	0.977902	NA	2.02584	0.199365	NA	0.130951	0.897773	NA	1.11891	1.10179	0.679407	0.819181	0.422326	0.418245	0.886512	0.523404	0.898029	0.860767
74629	4930426L09Rik	NA	0.6821	0.0435096	0.213741	0.980288	0.10158	NA	0.152066	0.775126	NA	-0.486901	0.306952	0.581738	0.404656	0.428476	0.635168	4.02216	3.60989	3.27481	2.8205	3.37143	3.28228	3.47259	3.78584	3.44237	3.23973
73867	4930428E07Rik	NA	NA	NA	NA	NA	NA	NA	NA	NA	NA	NA	NA	NA	NA	NA	NA	0	0	0	0	0	0	0	0	0	0
73856	4930428G15Rik	NA	0.734173	0.835418	NA	NA	NA	NA	-0.819222	0.816674	NA	NA	NA	NA	NA	NA	NA	-2.32029	-2.33285	-2.32698	-2.32734	-2.32379	-2.31147	-2.32154	-2.32055	-2.32606	-2.32592
654809	4930428O21Rik	NA	NA	NA	NA	0.715035	0.83965	NA	0.777271	0.485838	NA	0.826308	0.544028	NA	0.832801	0.518257	NA	-0.390832	-0.392833	-0.288927	-0.364091	0.294489	0.0648583	0.241556	-0.0113056	0.160286	0.00751306
67576	4930429B21Rik	NA	-0.137457	0.833338	NA	-1.01463	0.264584	NA	-0.495136	0.716119	NA	0.523765	0.767308	NA	-1.01016	0.341804	NA	1.53756	1.62239	1.1571	1.55057	1.18156	1.15705	0.936621	0.992904	1.06595	1.34274
74624	4930429D17Rik	NA	NA	NA	NA	NA	NA	NA	NA	NA	NA	NA	NA	NA	NA	NA	NA	0	0	0	0	0	0	0	0	0	0
74622	4930429F11Rik	NA	NA	NA	NA	NA	NA	NA	NA	NA	NA	NA	NA	NA	NA	NA	NA	0	0	0	0	0	0	0	0	0	0
74633	4930429F24Rik	NA	-0.708495	0.841097	NA	-0.63756	0.851454	NA	-0.503125	0.789475	NA	0.0152557	0.99478	NA	-0.859462	0.648791	NA	-1.24049	-1.17824	-1.14614	-1.09334	-1.07089	-0.981559	-0.969956	-1.03509	-1.07087	-0.941206
100505025	4930429H19Rik	NA	NA	NA	NA	NA	NA	NA	NA	NA	NA	NA	NA	NA	NA	NA	NA	0	0	0	0	0	0	0	0	0	0
67575	4930430A15Rik	ENSMUSG00000027157	NA	NA	NA	NA	NA	NA	NA	NA	NA	NA	NA	NA	NA	NA	NA	0	0	0	0	0	0	0	0	0	0
68281	4930430F08Rik	ENSMUSG00000046567	0.232842	0.103335	0.33751	0.0818413	0.593349	0.714563	0.210231	0.310618	0.585804	0.348453	0.0881036	0.272922	0.412757	0.0102571	0.0536507	7.24908	7.08063	7.07321	7.00575	6.69023	6.52677	6.70822	6.5415	7.26203	6.97861
73784	4930430F21Rik	NA	NA	NA	NA	NA	NA	NA	NA	NA	NA	NA	NA	NA	NA	NA	NA	0	0	0	0	0	0	0	0	0	0
73772	4930430J02Rik	NA	-1.7205	0.364839	NA	0.940004	0.629739	NA	0.623446	0.859961	NA	-0.675316	0.848446	NA	1.11624	0.457396	NA	-0.860734	-0.632415	-0.679707	-0.826649	-0.862412	-0.942612	-0.92779	-0.841678	-0.427714	-0.678223
75783	4930431F12Rik	NA	NA	NA	NA	NA	NA	NA	-0.819222	0.816674	NA	0.802735	0.633596	NA	1.15338	0.515847	NA	-1.53584	-1.53787	-1.50653	-1.50845	-1.42439	-1.42368	-1.28221	-1.27693	-1.19444	-1.37068
73895	4930431P03Rik	NA	0.395069	0.574189	NA	-1.22824	0.404187	NA	0.367096	0.614641	NA	0.305346	0.816097	NA	1.30116	0.122012	NA	1.77867	1.60375	1.11369	1.3011	1.94478	1.81321	1.49579	1.40682	1.99266	1.46675
243900	4930432E11Rik	NA	0.0241848	0.994537	NA	NA	NA	NA	-0.819222	0.816674	NA	NA	NA	NA	NA	NA	NA	-2.24839	-2.24894	-2.25811	-2.25864	-2.25347	-2.23559	-2.2502	-2.24877	-2.25678	-2.25656
73877	4930432J09Rik	NA	0.666322	0.517236	NA	-0.32265	0.794728	NA	-1.02685	0.571282	NA	0.0368776	0.991539	NA	-1.10579	0.405906	NA	0.667027	0.459205	0.385866	0.461333	0.158361	0.293361	0.10031	0.109018	0.356324	0.529637
74666	4930432K21Rik	ENSMUSG00000008129	-0.230797	0.348773	0.620253	-0.00664353	0.981825	0.988868	-0.531918	0.391995	NA	0.466707	0.629759	NA	0.46623	0.440535	NA	4.57439	4.73214	4.63626	4.63261	3.24831	3.62283	3.12832	2.88217	3.36662	3.16269
619318	4930432M17Rik	ENSMUSG00000074248	NA	NA	NA	NA	NA	NA	NA	NA	NA	NA	NA	NA	NA	NA	NA	0	0	0	0	0	0	0	0	0	0
73959	4930433B08Rik	NA	NA	NA	NA	NA	NA	NA	NA	NA	NA	NA	NA	NA	NA	NA	NA	0	0	0	0	0	0	0	0	0	0
243944	4930433I11Rik	ENSMUSG00000091692	NA	NA	NA	NA	NA	NA	NA	NA	NA	NA	NA	NA	NA	NA	NA	0	0	0	0	0	0	0	0	0	0
114673	4930433N12Rik	NA	NA	NA	NA	NA	NA	NA	NA	NA	NA	NA	NA	NA	0.706689	0.841496	NA	-2.40008	-2.4003	-2.39699	-2.39719	-2.39518	-2.39511	-2.39391	-2.39336	-2.38959	-2.39638
74667	4930434J06Rik	NA	NA	NA	NA	NA	NA	NA	NA	NA	NA	NA	NA	NA	NA	NA	NA	0	0	0	0	0	0	0	0	0	0
74663	4930435E12Rik	ENSMUSG00000022798	NA	NA	NA	NA	NA	NA	NA	NA	NA	NA	NA	NA	NA	NA	NA	0	0	0	0	0	0	0	0	0	0
73988	4930438A08Rik	ENSMUSG00000069873	-1.62261	0.642454	NA	-0.532118	0.801644	NA	-1.61948	0.44459	NA	-0.896337	0.4599	NA	-2.57637	0.0725904	NA	-0.429801	-0.262943	-0.254942	-0.199297	-0.302776	-0.0862464	-0.00108597	0.306578	-0.246371	0.327211
73977	4930438E09Rik	NA	NA	NA	NA	NA	NA	NA	NA	NA	NA	NA	NA	NA	NA	NA	NA	0	0	0	0	0	0	0	0	0	0
74689	4930440C22Rik	NA	NA	NA	NA	NA	NA	NA	NA	NA	NA	NA	NA	NA	NA	NA	NA	0	0	0	0	0	0	0	0	0	0
73962	4930441J16Rik	NA	NA	NA	NA	NA	NA	NA	NA	NA	NA	NA	NA	NA	NA	NA	NA	0	0	0	0	0	0	0	0	0	0
74660	4930442J19Rik	NA	NA	NA	NA	NA	NA	NA	NA	NA	NA	NA	NA	NA	NA	NA	NA	0	0	0	0	0	0	0	0	0	0
67583	4930442L01Rik	NA	NA	NA	NA	NA	NA	NA	0.623446	0.859961	NA	NA	NA	NA	NA	NA	NA	-2.40099	-2.40125	-2.39724	-2.39748	-2.38673	-2.39496	-2.39351	-2.39284	-2.39661	-2.39651
74687	4930443O20Rik	NA	-1.44807	0.681728	NA	0.715035	0.83965	NA	NA	NA	NA	-0.717433	0.790221	NA	NA	NA	NA	-2.07473	-2.00525	-2.02354	-2.05987	-2.04957	-2.04919	-2.00776	-1.9696	-2.05617	-2.05574
73968	4930444F02Rik	NA	NA	NA	NA	0.715035	0.83965	NA	NA	NA	NA	-0.675316	0.848446	NA	NA	NA	NA	-2.33427	-2.33473	-2.31298	-2.32809	-2.32381	-2.32365	-2.3211	-2.30522	-2.32655	-2.32637
114671	4930444G20Rik	ENSMUSG00000069712	1.31005	0.709203	NA	0.715035	0.83965	NA	0.39819	0.903421	NA	NA	NA	NA	0.706689	0.841496	NA	-1.93455	-2.00882	-1.95464	-1.99229	-1.90848	-1.94466	-1.97486	-1.97189	-1.95188	-1.98801
75789	4930444M15Rik	NA	NA	NA	NA	0.715035	0.83965	NA	NA	NA	NA	NA	NA	NA	NA	NA	NA	-2.40008	-2.4003	-2.39012	-2.39719	-2.39518	-2.39511	-2.39391	-2.39336	-2.39647	-2.39638
75799	4930444P10Rik	ENSMUSG00000067795	-1.31229	0.567615	NA	0.00576083	0.998698	NA	1.3767	0.696391	NA	0.767352	0.828094	NA	-0.01464	0.996694	NA	-1.7052	-1.60789	-1.68293	-1.68439	-1.62054	-1.71886	-1.66083	-1.70625	-1.6792	-1.6786
74892	4930447A16Rik	ENSMUSG00000022288	NA	NA	NA	NA	NA	NA	NA	NA	NA	NA	NA	NA	NA	NA	NA	0	0	0	0	0	0	0	0	0	0
75801	4930447C04Rik	ENSMUSG00000021098	-0.708495	0.841097	NA	NA	NA	NA	NA	NA	NA	NA	NA	NA	1.42488	0.686646	NA	-2.2663	-2.2489	-2.25821	-2.25874	-2.2535	-2.25331	-2.25018	-2.24872	-2.22093	-2.25664
74862	4930447F04Rik	NA	NA	NA	NA	NA	NA	NA	NA	NA	NA	NA	NA	NA	NA	NA	NA	0	0	0	0	0	0	0	0	0	0
73961	4930447J18Rik	NA	NA	NA	NA	NA	NA	NA	NA	NA	NA	NA	NA	NA	NA	NA	NA	0	0	0	0	0	0	0	0	0	0
432745	4930447K03Rik	NA	0.0939458	0.794499	0.909376	-0.320737	0.591513	NA	1.04917	0.373548	NA	0.767352	0.828094	NA	1.97313	0.531734	NA	2.9253	2.85497	2.12413	2.28818	1.58384	1.35773	1.1946	1.08529	1.20637	1.02203
71647	4930447N08Rik	NA	NA	NA	NA	NA	NA	NA	NA	NA	NA	NA	NA	NA	NA	NA	NA	0	0	0	0	0	0	0	0	0	0
73972	4930448C13Rik	NA	NA	NA	NA	NA	NA	NA	NA	NA	NA	NA	NA	NA	NA	NA	NA	0	0	0	0	0	0	0	0	0	0
73992	4930448F12Rik	NA	0.734173	0.835418	NA	NA	NA	NA	NA	NA	NA	NA	NA	NA	NA	NA	NA	-2.39357	-2.39968	-2.39682	-2.397	-2.39527	-2.39521	-2.39417	-2.39369	-2.39638	-2.3963
74872	4930448H16Rik	NA	NA	NA	NA	NA	NA	NA	NA	NA	NA	NA	NA	NA	NA	NA	NA	0	0	0	0	0	0	0	0	0	0
74897	4930448I06Rik	NA	NA	NA	NA	NA	NA	NA	NA	NA	NA	NA	NA	NA	NA	NA	NA	0	0	0	0	0	0	0	0	0	0
73965	4930448I18Rik	NA	NA	NA	NA	NA	NA	NA	NA	NA	NA	NA	NA	NA	NA	NA	NA	0	0	0	0	0	0	0	0	0	0
74662	4930448K20Rik	NA	0.203812	0.914102	NA	-0.727633	0.836864	NA	0.516719	0.790759	NA	1.52816	0.504611	NA	2.04651	0.270159	NA	-0.748359	-0.804917	-1.00837	-0.936784	-0.842564	-0.838108	-0.621872	-0.891556	-0.648129	-0.926666
73994	4930449C09Rik	NA	NA	NA	NA	NA	NA	NA	NA	NA	NA	NA	NA	NA	NA	NA	NA	0	0	0	0	0	0	0	0	0	0
74864	4930449E01Rik	NA	NA	NA	NA	NA	NA	NA	NA	NA	NA	NA	NA	NA	NA	NA	NA	0	0	0	0	0	0	0	0	0	0
78120	4930449E18Rik	NA	NA	NA	NA	NA	NA	NA	NA	NA	NA	NA	NA	NA	NA	NA	NA	0	0	0	0	0	0	0	0	0	0
67410	4930449I24Rik	ENSMUSG00000079093	NA	NA	NA	NA	NA	NA	NA	NA	NA	NA	NA	NA	NA	NA	NA	0	0	0	0	0	0	0	0	0	0
74684	4930451G09Rik	NA	0.320171	0.541754	0.761964	-0.231774	0.691314	NA	1.09603	0.676003	NA	-1.8915	0.315645	NA	0.753067	0.314166	NA	2.40835	2.26782	2.11669	2.22089	1.27227	1.16354	1.19075	1.4998	2.06054	1.74463
78118	4930451I11Rik	ENSMUSG00000045989	NA	NA	NA	NA	NA	NA	-0.819222	0.816674	NA	NA	NA	NA	NA	NA	NA	-2.40073	-2.40097	-2.39716	-2.3974	-2.39509	-2.3871	-2.39363	-2.39299	-2.39657	-2.39647
71092	4930452A19Rik	NA	NA	NA	NA	NA	NA	NA	NA	NA	NA	NA	NA	NA	NA	NA	NA	0	0	0	0	0	0	0	0	0	0
74430	4930452B06Rik	ENSMUSG00000021747	NA	NA	NA	NA	NA	NA	-0.819222	0.816674	NA	-0.675316	0.848446	NA	NA	NA	NA	-2.33528	-2.33578	-2.32804	-2.32851	-2.32382	-2.30758	-2.32085	-2.30347	-2.32683	-2.32663
73989	4930452G13Rik	NA	NA	NA	NA	NA	NA	NA	NA	NA	NA	NA	NA	NA	NA	NA	NA	0	0	0	0	0	0	0	0	0	0
78112	4930452N14Rik	NA	NA	NA	NA	NA	NA	NA	0.623446	0.859961	NA	0.767352	0.828094	NA	NA	NA	NA	-2.33457	-2.33504	-2.32777	-2.32822	-2.30872	-2.32365	-2.30593	-2.3198	-2.32663	-2.32645
100503481	4930453H23Rik	ENSMUSG00000087358	NA	NA	NA	NA	NA	NA	NA	NA	NA	NA	NA	NA	NA	NA	NA	0	0	0	0	0	0	0	0	0	0
67609	4930453N24Rik	ENSMUSG00000059920	-0.0545494	0.610717	0.809552	-0.140845	0.222463	0.364363	-0.211089	0.0425474	0.21068	-0.323414	0.000470005	0.00537186	-0.267353	0.0120321	0.0595551	8.81351	8.83913	8.9828	9.0527	9.64578	9.82831	9.50874	9.70388	9.03235	9.20289
74859	4930455B14Rik	NA	NA	NA	NA	NA	NA	NA	NA	NA	NA	NA	NA	NA	NA	NA	NA	0	0	0	0	0	0	0	0	0	0
73990	4930455C13Rik	NA	-0.013414	0.987901	NA	-0.489933	0.661088	NA	0.273087	0.768148	NA	0.0904807	0.926097	NA	0.13294	0.869071	NA	1.40903	1.4024	1.27426	1.40191	1.7003	1.45038	1.39989	1.52044	1.65771	1.6118
75795	4930455D15Rik	NA	-0.708495	0.841097	NA	0.715035	0.83965	NA	NA	NA	NA	NA	NA	NA	0.706689	0.841496	NA	-2.2664	-2.24889	-2.24018	-2.25879	-2.25351	-2.25332	-2.25017	-2.24871	-2.23881	-2.25667
76397	4930455F16Rik	NA	NA	NA	NA	1.42133	0.687374	NA	NA	NA	NA	NA	NA	NA	NA	NA	NA	-2.33284	-2.33324	-2.30172	-2.3275	-2.32379	-2.32366	-2.32144	-2.32041	-2.32616	-2.32601
78917	4930455G09Rik	NA	0.0615636	0.754551	0.887506	-0.365403	0.105846	0.221142	-0.475907	0.203344	0.471101	-0.148571	0.606278	0.812113	-0.255564	0.289434	0.499983	6.12008	6.0701	5.82351	6.03092	4.92849	4.98984	5.30805	5.57223	6.11561	6.29694
74654	4930455H04Rik	NA	NA	NA	NA	NA	NA	NA	NA	NA	NA	NA	NA	NA	NA	NA	NA	0	0	0	0	0	0	0	0	0	0
67585	4930455J16Rik	NA	NA	NA	NA	NA	NA	NA	NA	NA	NA	NA	NA	NA	NA	NA	NA	0	0	0	0	0	0	0	0	0	0
71650	4930456L15Rik	NA	NA	NA	NA	NA	NA	NA	NA	NA	NA	NA	NA	NA	NA	NA	NA	0	0	0	0	0	0	0	0	0	0
330146	4930458A03Rik	NA	NA	NA	NA	NA	NA	NA	NA	NA	NA	NA	NA	NA	NA	NA	NA	0	0	0	0	0	0	0	0	0	0
75802	4930458D05Rik	NA	1.94115	0.281426	NA	-1.17549	0.422072	NA	2.46543	0.254826	NA	2.94812	0.0845667	NA	1.10582	0.470325	NA	0.0757341	-0.204686	-0.0742261	0.12375	0.343939	-0.194267	0.133201	-0.173351	0.192607	-0.0793315
78163	4930459L07Rik	NA	NA	NA	NA	NA	NA	NA	NA	NA	NA	NA	NA	NA	NA	NA	NA	0	0	0	0	0	0	0	0	0	0
74879	4930461G14Rik	NA	NA	NA	NA	NA	NA	NA	NA	NA	NA	NA	NA	NA	0.706689	0.841496	NA	-2.40007	-2.40028	-2.39698	-2.39719	-2.39519	-2.39511	-2.39392	-2.39336	-2.38962	-2.39638
67640	4930465K10Rik	NA	1.34959	0.599369	NA	1.76414	0.235746	NA	0.623446	0.859961	NA	0.0125555	0.997067	NA	1.30122	0.445395	NA	-0.930924	-1.0474	-0.655104	-0.951276	-1.00303	-1.0741	-0.984718	-0.978539	-0.703194	-0.939884
74968	4930465M20Rik	NA	NA	NA	NA	NA	NA	NA	NA	NA	NA	NA	NA	NA	NA	NA	NA	0	0	0	0	0	0	0	0	0	0
75814	4930467D21Rik	NA	NA	NA	NA	NA	NA	NA	NA	NA	NA	NA	NA	NA	NA	NA	NA	0	0	0	0	0	0	0	0	0	0
626415	4930467E23Rik	ENSMUSG00000096265	NA	NA	NA	NA	NA	NA	NA	NA	NA	NA	NA	NA	NA	NA	NA	0	0	0	0	0	0	0	0	0	0
74928	4930467K11Rik	NA	-1.72337	0.378564	NA	0.00576083	0.998698	NA	-0.819222	0.816674	NA	NA	NA	NA	-0.735979	0.83502	NA	-1.83609	-1.71392	-1.81755	-1.81877	-1.84791	-1.80632	-1.84031	-1.83697	-1.8556	-1.81395
75815	4930470H14Rik	NA	NA	NA	NA	NA	NA	NA	NA	NA	NA	NA	NA	NA	NA	NA	NA	0	0	0	0	0	0	0	0	0	0
67637	4930470P17Rik	NA	NA	NA	NA	NA	NA	NA	NA	NA	NA	NA	NA	NA	NA	NA	NA	0	0	0	0	0	0	0	0	0	0
78176	4930471C04Rik	NA	0.734173	0.835418	NA	0.354005	0.823585	NA	-0.606351	0.780636	NA	NA	NA	NA	NA	NA	NA	-1.57856	-1.63564	-1.38336	-1.44131	-1.48118	-1.42428	-1.58336	-1.57879	-1.60428	-1.6036
74923	4930471D02Rik	NA	NA	NA	NA	NA	NA	NA	NA	NA	NA	NA	NA	NA	NA	NA	NA	0	0	0	0	0	0	0	0	0	0
74966	4930471G03Rik	NA	-0.639831	0.843017	NA	NA	NA	NA	NA	NA	NA	NA	NA	NA	NA	NA	NA	-2.2488	-2.23386	-2.25727	-2.25772	-2.25322	-2.25306	-2.25037	-2.24912	-2.2561	-2.25592
75022	4930471L23Rik	NA	-0.708495	0.841097	NA	NA	NA	NA	NA	NA	NA	NA	NA	NA	NA	NA	NA	-2.39903	-2.39401	-2.3967	-2.39685	-2.39534	-2.39528	-2.39438	-2.39396	-2.3963	-2.39624
75787	4930471M09Rik	NA	-0.71218	0.800963	NA	0.715035	0.83965	NA	NA	NA	NA	0.767352	0.828094	NA	NA	NA	NA	-2.10787	-2.0815	-2.0956	-2.12363	-2.11569	-2.11539	-2.08343	-2.10844	-2.12077	-2.12044
321014	4930473A02Rik	NA	0.261904	0.230554	0.506436	0.0390263	0.873661	0.921386	-0.236382	0.478467	0.719679	0.222322	0.588726	0.801899	0.132772	0.74179	0.861949	5.574	5.37388	5.45339	5.38967	4.73606	4.81195	4.54611	4.52307	4.36933	4.29926
75025	4930473O22Rik	NA	NA	NA	NA	NA	NA	NA	NA	NA	NA	NA	NA	NA	NA	NA	NA	0	0	0	0	0	0	0	0	0	0
320624	4930474G06Rik	NA	NA	NA	NA	NA	NA	NA	NA	NA	NA	NA	NA	NA	NA	NA	NA	0	0	0	0	0	0	0	0	0	0
74967	4930474H20Rik	NA	NA	NA	NA	-1.48056	0.674848	NA	NA	NA	NA	NA	NA	NA	NA	NA	NA	-2.33311	-2.33352	-2.32722	-2.30146	-2.3238	-2.32365	-2.32138	-2.32032	-2.32624	-2.32608
74917	4930474M22Rik	NA	NA	NA	NA	NA	NA	NA	NA	NA	NA	NA	NA	NA	NA	NA	NA	0	0	0	0	0	0	0	0	0	0
218921	4930474N05Rik	ENSMUSG00000096405	NA	NA	NA	NA	NA	NA	NA	NA	NA	NA	NA	NA	NA	NA	NA	0	0	0	0	0	0	0	0	0	0
67639	4930474N09Rik	NA	-0.0985902	0.929664	NA	-0.650616	0.541628	NA	-1.52578	0.665746	NA	-0.675316	0.848446	NA	-0.735979	0.83502	NA	-0.234802	-0.228029	-0.224654	0.00572054	-0.639739	-0.486214	-0.630106	-0.543967	-0.64909	-0.577537
75818	4930478L05Rik	NA	-1.24885	0.722196	NA	-0.777208	0.774984	NA	1.16637	0.450733	NA	2.19986	0.0996347	NA	0.403253	0.762904	NA	-0.34725	-0.228735	-0.241051	-0.169551	0.201514	-0.0542726	0.524597	-0.0523574	0.186006	0.092427
74429	4930478P22Rik	NA	NA	NA	NA	NA	NA	NA	NA	NA	NA	NA	NA	NA	NA	NA	NA	0	0	0	0	0	0	0	0	0	0
74925	4930479D17Rik	NA	-0.379896	0.753358	NA	-1.27073	0.211564	NA	0.71197	0.442292	NA	2.58244	0.133456	NA	0.336048	0.836174	NA	0.578063	0.651103	0.635033	0.9748	0.893778	0.817187	0.963367	0.393934	0.626421	0.526257
74910	4930480E11Rik	ENSMUSG00000035651	NA	NA	NA	NA	NA	NA	NA	NA	NA	NA	NA	NA	NA	NA	NA	0	0	0	0	0	0	0	0	0	0
74988	4930480G23Rik	NA	0.734173	0.835418	NA	NA	NA	NA	NA	NA	NA	0.767352	0.828094	NA	NA	NA	NA	-2.31979	-2.33421	-2.32747	-2.32789	-2.30982	-2.32365	-2.32122	-2.32008	-2.32642	-2.32625
78800	4930480K15Rik	NA	NA	NA	NA	NA	NA	NA	NA	NA	NA	NA	NA	NA	NA	NA	NA	0	0	0	0	0	0	0	0	0	0
74930	4930480M12Rik	NA	NA	NA	NA	NA	NA	NA	NA	NA	NA	NA	NA	NA	NA	NA	NA	0	0	0	0	0	0	0	0	0	0
74931	4930481A15Rik	NA	-0.0175365	0.921297	0.965707	0.090488	0.772768	0.851692	0.281443	0.487437	0.725417	0.34309	0.478697	0.727716	0.688686	0.0853063	0.230345	6.02703	6.02952	5.71136	5.57488	4.69006	4.70353	4.591	4.28165	4.66362	4.29718
67638	4930483J18Rik	NA	-0.0714953	0.952181	NA	0.709786	0.796685	NA	-0.819222	0.816674	NA	0.055517	0.987188	NA	-0.0182634	0.995874	NA	-0.77228	-0.794488	-1.04259	-1.1141	-1.09062	-1.08985	-1.14897	-1.07158	-1.10639	-1.10457
74953	4930483K19Rik	NA	0.128859	0.708707	0.863321	-0.14939	0.745684	0.832084	0.464055	0.415675	0.674164	0.532036	0.0971962	0.291612	0.603395	0.0153944	0.0706976	4.19225	4.11926	3.83834	3.91884	4.17597	3.72799	4.76657	4.62095	5.37601	4.9532
74970	4930483O08Rik	NA	0.734173	0.835418	NA	NA	NA	NA	NA	NA	NA	-0.675316	0.848446	NA	-0.01464	0.996694	NA	-2.17753	-2.20228	-2.19072	-2.19143	-2.18442	-2.18417	-2.17999	-2.15405	-2.16491	-2.16462
78170	4930486F22Rik	NA	NA	NA	NA	NA	NA	NA	NA	NA	NA	NA	NA	NA	NA	NA	NA	0	0	0	0	0	0	0	0	0	0
75028	4930486I03Rik	NA	NA	NA	NA	NA	NA	NA	NA	NA	NA	NA	NA	NA	NA	NA	NA	0	0	0	0	0	0	0	0	0	0
214639	4930486L24Rik	ENSMUSG00000050345	-0.368524	0.166361	0.428483	-0.809787	0.0148027	0.0677665	-0.593047	0.139058	0.386588	-0.777823	0.000988572	0.00971043	-0.0397013	0.863209	0.932555	4.8435	5.05934	4.4861	4.92825	4.75207	4.87727	5.19728	5.88798	5.5205	5.53598
78172	4930487D11Rik	NA	-0.741493	0.671535	NA	0.742513	0.693434	NA	-0.819222	0.816674	NA	1.26599	0.606758	NA	1.97313	0.531734	NA	-1.05645	-0.955595	-1.00608	-1.07712	-1.05598	-1.12309	-1.1107	-1.10492	-1.01026	-1.20746
74992	4930487H11Rik	NA	0.925263	0.0588717	0.249865	1.2837	1.27155e-05	0.000805709	0.788826	0.00292087	0.0446845	-0.25394	0.444227	0.702198	0.834288	0.00977571	0.0519212	4.36116	3.96874	6.63411	5.71379	5.85802	5.4514	5.62786	5.70326	5.26654	4.79377
74971	4930488B22Rik	NA	NA	NA	NA	-0.727633	0.836864	NA	-0.819222	0.816674	NA	NA	NA	NA	NA	NA	NA	-2.33338	-2.3338	-2.32732	-2.31428	-2.3238	-2.31021	-2.32131	-2.32022	-2.32631	-2.32615
75809	4930488L21Rik	NA	NA	NA	NA	NA	NA	NA	NA	NA	NA	NA	NA	NA	NA	NA	NA	0	0	0	0	0	0	0	0	0	0
75011	4930488N24Rik	NA	NA	NA	NA	NA	NA	NA	NA	NA	NA	NA	NA	NA	NA	NA	NA	0	0	0	0	0	0	0	0	0	0
70969	4930500F04Rik	NA	NA	NA	NA	NA	NA	NA	NA	NA	NA	NA	NA	NA	NA	NA	NA	0	0	0	0	0	0	0	0	0	0
74973	4930500L23Rik	NA	-0.708495	0.841097	NA	0.014125	0.996809	NA	NA	NA	NA	NA	NA	NA	NA	NA	NA	-2.26569	-2.24901	-2.24072	-2.24123	-2.25342	-2.25323	-2.25024	-2.24884	-2.25663	-2.25643
74951	4930502A04Rik	NA	NA	NA	NA	NA	NA	NA	NA	NA	NA	NA	NA	NA	NA	NA	NA	0	0	0	0	0	0	0	0	0	0
74995	4930502E09Rik	NA	0.063289	0.966982	NA	-0.962971	0.637127	NA	0.258532	0.820017	NA	0.896941	0.315384	NA	0.67939	0.456752	NA	0.73417	0.662063	0.580141	0.685082	1.16461	0.92372	1.30595	1.13145	1.24318	0.991736
75013	4930502E18Rik	ENSMUSG00000055555	NA	NA	NA	-1.28857	0.713768	NA	NA	NA	NA	NA	NA	NA	NA	NA	NA	-2.33259	-2.33297	-2.32703	-2.3027	-2.32379	-2.32366	-2.32151	-2.32051	-2.32609	-2.32595
75015	4930503B20Rik	ENSMUSG00000048652 /// ENSMUSG00000090202	-0.708495	0.841097	NA	-0.0158049	0.99643	NA	NA	NA	NA	NA	NA	NA	NA	NA	NA	-2.26542	-2.24906	-2.24093	-2.24143	-2.25338	-2.2532	-2.25026	-2.24889	-2.25654	-2.25633
74954	4930503E14Rik	ENSMUSG00000072595	NA	NA	NA	NA	NA	NA	NA	NA	NA	NA	NA	NA	NA	NA	NA	0	0	0	0	0	0	0	0	0	0
75030	4930503E24Rik	NA	0.0128434	0.9971	NA	-1.75725	0.453271	NA	-1.43999	0.433095	NA	1.49817	0.66316	NA	-0.177579	0.944398	NA	-1.18763	-1.18573	-1.15486	-0.939752	-1.06378	-0.874757	-1.04904	-1.18715	-1.08853	-1.07741
74941	4930503H13Rik	NA	NA	NA	NA	NA	NA	NA	NA	NA	NA	NA	NA	NA	NA	NA	NA	0	0	0	0	0	0	0	0	0	0
269033	4930503L19Rik	ENSMUSG00000044906	0.220285	0.227805	0.503797	0.500349	0.0502753	0.137742	0.296786	0.127423	0.369413	-0.138213	0.297276	0.571592	0.277622	0.0762383	0.212917	8.85895	8.69852	8.79934	8.44211	9.32039	8.93706	9.63676	9.91796	9.33044	9.15294
74942	4930503O07Rik	NA	NA	NA	NA	NA	NA	NA	NA	NA	NA	NA	NA	NA	NA	NA	NA	0	0	0	0	0	0	0	0	0	0
403200	4930504O13Rik	ENSMUSG00000052642	NA	NA	NA	NA	NA	NA	NA	NA	NA	NA	NA	NA	NA	NA	NA	0	0	0	0	0	0	0	0	0	0
75087	4930505A04Rik	ENSMUSG00000040919	NA	NA	NA	NA	NA	NA	NA	NA	NA	NA	NA	NA	NA	NA	NA	0	0	0	0	0	0	0	0	0	0
75088	4930505G20Rik	NA	NA	NA	NA	NA	NA	NA	NA	NA	NA	NA	NA	NA	NA	NA	NA	0	0	0	0	0	0	0	0	0	0
67641	4930505M18Rik	NA	NA	NA	NA	NA	NA	NA	NA	NA	NA	NA	NA	NA	NA	NA	NA	0	0	0	0	0	0	0	0	0	0
74709	4930505O20Rik	NA	NA	NA	NA	NA	NA	NA	NA	NA	NA	NA	NA	NA	NA	NA	NA	0	0	0	0	0	0	0	0	0	0
74706	4930507D05Rik	NA	0.183828	0.875145	NA	0.59069	0.438865	NA	-0.541579	0.567691	NA	0.852504	0.54848	NA	1.05965	0.512277	NA	0.941737	0.888658	1.5755	1.2589	1.19135	1.2891	0.983106	0.875625	0.871118	0.737138
75115	4930509E16Rik	NA	0.302739	0.694248	NA	0.555173	0.64232	NA	-0.309331	0.820379	NA	-0.255993	0.895292	NA	-1.51626	0.429981	NA	1.03757	0.910765	0.756506	0.602085	0.501779	0.647443	0.546528	0.532571	0.369539	0.572182
74693	4930509J09Rik	NA	NA	NA	NA	NA	NA	NA	NA	NA	NA	NA	NA	NA	NA	NA	NA	0	0	0	0	0	0	0	0	0	0
75819	4930509K18Rik	NA	NA	NA	NA	-0.727633	0.836864	NA	NA	NA	NA	NA	NA	NA	NA	NA	NA	-2.39983	-2.40003	-2.39692	-2.39064	-2.39522	-2.39515	-2.39402	-2.3935	-2.39643	-2.39635
74695	4930510E17Rik	NA	NA	NA	NA	-0.727633	0.836864	NA	-1.37876	0.694547	NA	NA	NA	NA	NA	NA	NA	-2.26844	-2.26908	-2.25918	-2.23923	-2.25378	-2.21245	-2.24998	-2.24832	-2.25762	-2.25738
74712	4930511A02Rik	NA	-0.708495	0.841097	NA	NA	NA	NA	NA	NA	NA	NA	NA	NA	NA	NA	NA	-2.39915	-2.39394	-2.39673	-2.39689	-2.39532	-2.39526	-2.39432	-2.39389	-2.39632	-2.39626
78773	4930511E03Rik	NA	NA	NA	NA	NA	NA	NA	NA	NA	NA	NA	NA	NA	NA	NA	NA	0	0	0	0	0	0	0	0	0	0
75084	4930511M06Rik	NA	NA	NA	NA	NA	NA	NA	NA	NA	NA	NA	NA	NA	NA	NA	NA	0	0	0	0	0	0	0	0	0	0
74724	4930512B01Rik	NA	0.927965	0.323645	NA	0.155379	0.923688	NA	-0.109287	0.941878	NA	1.38017	0.444578	NA	-1.32008	0.418023	NA	0.69932	0.409956	0.332018	0.290718	0.417385	0.299564	0.242447	0.17815	0.185974	0.372717
75111	4930512H18Rik	NA	-0.301497	0.457425	0.706681	-0.033013	0.935564	0.960554	-0.0165578	0.93901	0.974354	-0.218413	0.18035	0.432971	0.180225	0.257024	0.464693	4.58431	4.70689	4.68683	4.68747	6.6825	6.60467	6.78328	7.02404	6.61974	6.48957
75095	4930513D17Rik	NA	NA	NA	NA	NA	NA	NA	0.623446	0.859961	NA	NA	NA	NA	NA	NA	NA	-2.39996	-2.40017	-2.39695	-2.39715	-2.38853	-2.39513	-2.39397	-2.39343	-2.39645	-2.39637
319960	4930513N10Rik	NA	0.0692703	0.842842	0.931342	0.411679	0.32588	0.475555	0.609896	0.142455	0.391567	-0.697621	0.116043	0.329127	0.117894	0.752016	0.867902	4.1513	4.0899	4.15453	3.86208	4.13193	3.90372	3.93959	4.22675	4.13026	4.06066
75125	4930513O06Rik	ENSMUSG00000031270	NA	NA	NA	NA	NA	NA	NA	NA	NA	NA	NA	NA	NA	NA	NA	0	0	0	0	0	0	0	0	0	0
75128	4930515B02Rik	NA	NA	NA	NA	NA	NA	NA	NA	NA	NA	NA	NA	NA	NA	NA	NA	0	0	0	0	0	0	0	0	0	0
67642	4930515G01Rik	NA	-0.159684	0.597936	0.801742	0.0783488	0.848397	0.903341	0.0275883	0.939855	0.974541	0.490789	0.180342	0.432971	0.175945	0.602996	0.773566	4.76814	4.87088	4.69139	4.65685	4.62888	4.75691	4.93737	4.53019	5.04742	4.97865
75070	4930515G16Rik	NA	NA	NA	NA	NA	NA	NA	-0.819222	0.816674	NA	NA	NA	NA	NA	NA	NA	-2.40081	-2.40107	-2.39719	-2.39743	-2.39508	-2.38694	-2.39359	-2.39294	-2.39658	-2.39648
75069	4930515L03Rik	NA	NA	NA	NA	NA	NA	NA	NA	NA	NA	NA	NA	NA	NA	NA	NA	0	0	0	0	0	0	0	0	0	0
75133	4930515L19Rik	NA	NA	NA	NA	NA	NA	NA	NA	NA	NA	NA	NA	NA	NA	NA	NA	0	0	0	0	0	0	0	0	0	0
74702	4930517E11Rik	NA	NA	NA	NA	NA	NA	NA	NA	NA	NA	NA	NA	NA	NA	NA	NA	0	0	0	0	0	0	0	0	0	0
74704	4930518I15Rik	NA	-0.0314184	0.870352	0.944236	0.481558	0.366651	NA	-0.238066	0.427544	0.682941	-0.136492	0.506889	0.745992	0.0970534	0.594541	0.767654	5.87205	5.88629	4.64857	4.44958	6.70882	6.72472	6.62152	6.80011	6.32367	6.25232
71654	4930518P08Rik	NA	NA	NA	NA	NA	NA	NA	NA	NA	NA	NA	NA	NA	NA	NA	NA	0	0	0	0	0	0	0	0	0	0
75090	4930519D14Rik	NA	NA	NA	NA	-1.24072	0.724111	NA	0.553482	0.842503	NA	NA	NA	NA	NA	NA	NA	-2.13793	-2.13887	-2.12441	-2.0653	-2.05654	-2.08622	-2.111	-2.10856	-2.12215	-2.12179
114676	4930519F09Rik	NA	NA	NA	NA	-0.727633	0.836864	NA	NA	NA	NA	-0.675316	0.848446	NA	0.706689	0.841496	NA	-2.26844	-2.26908	-2.25918	-2.23923	-2.25379	-2.25356	-2.24998	-2.22776	-2.23707	-2.25738
75106	4930519F16Rik	ENSMUSG00000031325	0.734173	0.835418	NA	0.435663	0.896408	NA	-0.819222	0.816674	NA	NA	NA	NA	NA	NA	NA	-2.10791	-2.13782	-2.06583	-2.0957	-2.11624	-2.08692	-2.11088	-2.10852	-2.12165	-2.1213
108970	4930519F24Rik	NA	NA	NA	NA	NA	NA	NA	NA	NA	NA	NA	NA	NA	NA	NA	NA	0	0	0	0	0	0	0	0	0	0
67593	4930519G04Rik	ENSMUSG00000029564	0.734173	0.835418	NA	NA	NA	NA	-1.4502	0.522159	NA	2.11037	0.327689	NA	-0.0356395	0.983963	NA	-1.33637	-1.40255	-1.37145	-1.37348	-1.28487	-1.14694	-1.00561	-1.26662	-1.16049	-1.15991
75058	4930519H02Rik	NA	NA	NA	NA	NA	NA	NA	NA	NA	NA	NA	NA	NA	NA	NA	NA	0	0	0	0	0	0	0	0	0	0
75116	4930520O04Rik	NA	0.378519	0.280063	0.555204	0.667675	0.220366	NA	0.438389	0.430838	NA	0.00978985	0.984437	0.995837	4.08056e-05	0.999937	0.999941	4.05983	3.80337	3.23534	2.92517	3.39197	3.17808	3.51103	3.51866	3.32826	3.33865
75086	4930520P13Rik	NA	NA	NA	NA	NA	NA	NA	NA	NA	NA	NA	NA	NA	NA	NA	NA	0	0	0	0	0	0	0	0	0	0
75066	4930521E06Rik	NA	NA	NA	NA	NA	NA	NA	NA	NA	NA	NA	NA	NA	NA	NA	NA	0	0	0	0	0	0	0	0	0	0
67646	4930522H14Rik	ENSMUSG00000060491	NA	NA	NA	NA	NA	NA	NA	NA	NA	NA	NA	NA	NA	NA	NA	0	0	0	0	0	0	0	0	0	0
75094	4930522N08Rik	NA	NA	NA	NA	NA	NA	NA	NA	NA	NA	NA	NA	NA	NA	NA	NA	0	0	0	0	0	0	0	0	0	0
78180	4930522O17Rik	NA	NA	NA	NA	NA	NA	NA	NA	NA	NA	NA	NA	NA	NA	NA	NA	0	0	0	0	0	0	0	0	0	0
67647	4930523C07Rik	ENSMUSG00000090394	-0.0756529	0.621417	0.816046	0.0163237	0.916514	0.948548	-0.0705425	0.683061	0.843954	-0.372943	0.233116	0.500324	0.50351	0.187807	0.384249	6.481	6.52466	6.86467	6.83281	6.83493	7.19738	6.06334	5.96427	5.25071	5.01637
74726	4930523O13Rik	NA	NA	NA	NA	NA	NA	NA	NA	NA	NA	NA	NA	NA	NA	NA	NA	0	0	0	0	0	0	0	0	0	0
67592	4930524B15Rik	ENSMUSG00000020299	0.0140781	0.995722	NA	1.68912	0.408348	NA	-0.819222	0.816674	NA	0.0380964	0.98621	NA	NA	NA	NA	-1.46746	-1.48184	-1.32257	-1.5017	-1.48445	-1.48381	-1.47352	-1.40959	-1.55462	-1.5539
75822	4930524C18Rik	NA	NA	NA	NA	0.715035	0.83965	NA	NA	NA	NA	NA	NA	NA	NA	NA	NA	-2.40032	-2.40055	-2.38979	-2.39727	-2.39515	-2.39507	-2.39381	-2.39322	-2.39651	-2.39642
75071	4930524N10Rik	ENSMUSG00000059663	NA	NA	NA	NA	NA	NA	NA	NA	NA	NA	NA	NA	NA	NA	NA	0	0	0	0	0	0	0	0	0	0
75096	4930524O05Rik	NA	NA	NA	NA	NA	NA	NA	NA	NA	NA	NA	NA	NA	NA	NA	NA	0	0	0	0	0	0	0	0	0	0
74700	4930524O08Rik	NA	NA	NA	NA	-0.992049	0.542435	NA	0.208532	0.939618	NA	-0.675316	0.848446	NA	-1.51519	0.6675	NA	-1.44692	-1.44997	-1.23095	-1.06026	-1.22253	-1.27113	-1.3895	-1.3184	-1.41394	-1.28162
75100	4930525D18Rik	NA	0.201378	0.877836	NA	0.71948	0.458684	NA	-0.778512	0.637533	NA	0.767352	0.828094	NA	0.514994	0.852347	NA	-0.056774	-0.0969963	0.294398	0.0521658	-0.249449	-0.0278765	-0.151855	-0.360437	-0.245594	-0.315263
320163	4930525G20Rik	NA	-0.196064	0.717552	NA	-0.485295	0.662106	NA	2.66722	0.143954	NA	0.777591	0.478656	NA	0.482756	0.536165	NA	2.01034	2.1159	1.33772	1.49241	1.54168	1.02922	1.49244	1.43381	1.8241	1.62499
75135	4930526I15Rik	NA	-0.0645837	0.54019	0.761179	-0.171576	0.236735	0.380476	0.123365	0.486537	0.725223	-0.00441432	0.97504	0.991733	-0.164895	0.231914	0.43632	8.061	8.09736	8.17284	8.26674	8.09415	7.98826	8.08603	8.13289	8.11361	8.21249
75138	4930526L06Rik	NA	-0.786372	0.0471456	0.223096	-0.668756	0.130049	0.253777	-0.801667	0.186991	NA	-0.638943	0.417693	NA	-0.342708	0.649693	NA	3.1409	3.58089	3.26739	3.65713	2.74926	3.33267	2.79642	2.86795	2.6535	2.8313
67651	4930527F14Rik	NA	NA	NA	NA	NA	NA	NA	NA	NA	NA	NA	NA	NA	NA	NA	NA	0	0	0	0	0	0	0	0	0	0
78199	4930527G23Rik	NA	NA	NA	NA	NA	NA	NA	NA	NA	NA	NA	NA	NA	NA	NA	NA	0	0	0	0	0	0	0	0	0	0
75164	4930527J03Rik	NA	NA	NA	NA	NA	NA	NA	NA	NA	NA	NA	NA	NA	0.706689	0.841496	NA	-2.40007	-2.40028	-2.39698	-2.39719	-2.39519	-2.39511	-2.39392	-2.39336	-2.38962	-2.39638
67735	4930528A17Rik	NA	0.0869059	0.921459	NA	0.915708	0.32503	NA	-0.627866	0.593145	NA	0.610754	0.631179	NA	-0.231866	0.854271	NA	1.13464	1.11345	1.37887	1.07104	0.77685	1.12513	1.26549	0.961029	0.938069	0.968238
75223	4930528D03Rik	NA	NA	NA	NA	NA	NA	NA	NA	NA	NA	NA	NA	NA	NA	NA	NA	0	0	0	0	0	0	0	0	0	0
78193	4930528P14Rik	NA	NA	NA	NA	NA	NA	NA	NA	NA	NA	NA	NA	NA	NA	NA	NA	0	0	0	0	0	0	0	0	0	0
619677	4930529C04Rik	NA	-0.707424	0.800025	NA	-0.0158051	0.99643	NA	NA	NA	NA	NA	NA	NA	0.722032	0.796722	NA	-1.90318	-1.86611	-1.88594	-1.88708	-1.91417	-1.91376	-1.9071	-1.90399	-1.84479	-1.88259
75155	4930529K09Rik	NA	NA	NA	NA	NA	NA	NA	NA	NA	NA	NA	NA	NA	NA	NA	NA	0	0	0	0	0	0	0	0	0	0
78023	4930529L06Rik	NA	NA	NA	NA	NA	NA	NA	NA	NA	NA	-0.675316	0.848446	NA	0.706689	0.841496	NA	-2.33498	-2.33547	-2.32793	-2.32839	-2.32382	-2.32365	-2.32092	-2.30399	-2.31108	-2.32656
75166	4930533B01Rik	NA	0.417483	0.530853	NA	0.846915	0.30852	NA	0.290607	0.684956	NA	0.765528	0.244529	NA	-0.487642	0.467625	NA	2.24153	2.08052	2.18587	1.86743	2.38766	2.20324	2.60285	2.31774	2.27698	2.51006
75159	4930533P14Rik	NA	NA	NA	NA	NA	NA	NA	NA	NA	NA	NA	NA	NA	NA	NA	NA	0	0	0	0	0	0	0	0	0	0
100503594	4930534D22Rik	NA	NA	NA	NA	NA	NA	NA	NA	NA	NA	NA	NA	NA	NA	NA	NA	0	0	0	0	0	0	0	0	0	0
75208	4930539C22Rik	NA	NA	NA	NA	NA	NA	NA	NA	NA	NA	NA	NA	NA	NA	NA	NA	0	0	0	0	0	0	0	0	0	0
207819	4930539E08Rik	ENSMUSG00000048905	-0.0378731	0.951084	NA	0.183811	0.748357	NA	-0.125501	0.786807	0.903529	-0.993095	0.0571099	0.204346	-0.0285212	0.956219	0.978155	2.89483	2.89287	3.10442	2.99872	3.23776	3.39437	3.19385	3.65968	3.133	3.14213
319587	4930539J05Rik	NA	0.0412255	0.817629	0.920611	0.272756	0.190911	0.328536	0.0969202	0.616968	0.807952	-0.137883	0.248265	0.519298	-0.0718426	0.621249	0.785497	6.88334	6.85593	7.42713	7.23479	7.88545	7.70342	8.04981	8.26289	7.71356	7.75908
75149	4930539M17Rik	NA	NA	NA	NA	0.715035	0.83965	NA	NA	NA	NA	1.24735	0.613567	NA	-0.735979	0.83502	NA	-2.07743	-2.07861	-2.02275	-2.06156	-2.05056	-2.05015	-1.93049	-2.00283	-2.0576	-2.01944
75203	4930539N22Rik	NA	NA	NA	NA	NA	NA	NA	NA	NA	NA	NA	NA	NA	NA	NA	NA	0	0	0	0	0	0	0	0	0	0
78025	4930540M03Rik	NA	NA	NA	NA	NA	NA	NA	NA	NA	NA	NA	NA	NA	NA	NA	NA	0	0	0	0	0	0	0	0	0	0
75175	4930542C21Rik	NA	NA	NA	NA	NA	NA	NA	NA	NA	NA	NA	NA	NA	NA	NA	NA	0	0	0	0	0	0	0	0	0	0
75211	4930542D17Rik	NA	-0.603111	0.751373	NA	1.33165	0.413787	NA	1.5358	0.534574	NA	NA	NA	NA	1.27191	0.7172	NA	-1.00671	-0.970279	-0.818078	-1.05231	-0.924759	-1.09819	-1.15798	-1.15211	-1.05662	-1.18401
75239	4930543E12Rik	NA	NA	NA	NA	NA	NA	NA	NA	NA	NA	NA	NA	NA	NA	NA	NA	0	0	0	0	0	0	0	0	0	0
668433	4930544D05Rik	ENSMUSG00000087279	-0.707446	0.800236	NA	-0.370637	0.849242	NA	-0.819222	0.816674	NA	-1.52453	0.658423	NA	0.706689	0.841496	NA	-1.46973	-1.41453	-1.31999	-1.27259	-1.48712	-1.42542	-1.47584	-1.29134	-1.43748	-1.49779
67653	4930544G11Rik	ENSMUSG00000036463	NA	NA	NA	NA	NA	NA	NA	NA	NA	NA	NA	NA	NA	NA	NA	0	0	0	0	0	0	0	0	0	0
78807	4930544L04Rik	NA	NA	NA	NA	NA	NA	NA	NA	NA	NA	NA	NA	NA	NA	NA	NA	0	0	0	0	0	0	0	0	0	0
75161	4930544M13Rik	NA	NA	NA	NA	NA	NA	NA	NA	NA	NA	NA	NA	NA	NA	NA	NA	0	0	0	0	0	0	0	0	0	0
75162	4930545E07Rik	NA	NA	NA	NA	NA	NA	NA	NA	NA	NA	NA	NA	NA	NA	NA	NA	0	0	0	0	0	0	0	0	0	0
75148	4930545H06Rik	NA	NA	NA	NA	NA	NA	NA	NA	NA	NA	NA	NA	NA	NA	NA	NA	0	0	0	0	0	0	0	0	0	0
78805	4930545L23Rik	NA	-0.708495	0.841097	NA	NA	NA	NA	0.623446	0.859961	NA	NA	NA	NA	NA	NA	NA	-2.33259	-2.32063	-2.32703	-2.32739	-2.32379	-2.32366	-2.30917	-2.32051	-2.32609	-2.32594
78931	4930546C10Rik	NA	NA	NA	NA	0.126292	0.918186	NA	-0.0775667	0.944294	NA	-0.111419	0.91402	NA	-0.310341	0.875589	NA	0.00110175	-0.00143831	0.518822	0.459417	0.461726	0.599176	0.891599	0.766026	0.245256	0.293629
78194	4930546K05Rik	NA	0.734173	0.835418	NA	NA	NA	NA	NA	NA	NA	NA	NA	NA	NA	NA	NA	-2.39384	-2.39921	-2.3967	-2.39685	-2.39533	-2.39528	-2.39437	-2.39395	-2.39631	-2.39624
78031	4930547E08Rik	NA	-0.0625379	0.958881	NA	-0.443414	0.819663	NA	0.30897	0.842918	NA	3.48571	0.0468149	NA	1.1019	0.536884	NA	0.100582	0.112945	-0.113336	-0.0133674	0.0527858	0.0898863	0.521943	-0.223025	0.0805797	-0.108761
75145	4930547E14Rik	NA	-0.708495	0.841097	NA	NA	NA	NA	NA	NA	NA	-0.675316	0.848446	NA	NA	NA	NA	-2.33362	-2.32028	-2.32741	-2.32782	-2.3238	-2.32365	-2.32126	-2.30637	-2.32637	-2.32621
75299	4930547M16Rik	NA	0.33456	0.701615	NA	-1.41939	0.276404	NA	2.44432	0.156471	NA	NA	NA	NA	-0.212743	0.878037	NA	0.61818	0.509658	0.132299	0.411409	0.216148	0.0166379	0.13171	-0.040148	0.291245	0.354168
75281	4930548G14Rik	NA	NA	NA	NA	-0.727633	0.836864	NA	NA	NA	NA	NA	NA	NA	-0.735979	0.83502	NA	-2.33307	-2.33348	-2.32721	-2.31458	-2.3238	-2.32365	-2.32139	-2.32033	-2.32623	-2.31305
67656	4930548H24Rik	ENSMUSG00000029138	0.188428	0.869079	NA	-0.901086	0.475524	NA	0.665687	0.647146	NA	-0.0995362	0.948196	NA	1.25958	0.416159	NA	0.451048	0.414151	0.278682	0.45711	0.361409	0.319392	0.44508	0.415449	0.449796	0.225842
78043	4930548J01Rik	NA	NA	NA	NA	NA	NA	NA	NA	NA	NA	0.767352	0.828094	NA	NA	NA	NA	-2.40128	-2.40155	-2.39732	-2.39758	-2.38622	-2.39492	-2.39339	-2.39267	-2.39665	-2.39655
75360	4930548K13Rik	NA	NA	NA	NA	NA	NA	NA	NA	NA	NA	NA	NA	NA	NA	NA	NA	0	0	0	0	0	0	0	0	0	0
75286	4930549G23Rik	NA	0.10407	0.902526	NA	0.445605	0.502154	NA	0.241368	0.578876	0.782137	-0.240228	0.694284	NA	-0.189327	0.774233	NA	2.37399	2.36927	2.79547	2.54569	3.44497	3.33066	2.88494	2.98043	2.63917	2.70478
75311	4930550C14Rik	ENSMUSG00000005131	-0.764236	0.124736	0.369903	-0.301379	0.627219	NA	-1.20924	0.394968	NA	0.40482	0.810952	NA	1.03089	0.504339	NA	2.22879	2.70852	2.33843	2.50405	1.31629	1.5616	1.38499	1.33556	1.42712	1.24188
75352	4930550L24Rik	ENSMUSG00000046180	0.740792	0.793334	NA	0.745661	0.787608	NA	1.53401	0.660695	NA	0.767352	0.828094	NA	0.818253	0.777378	NA	-1.47914	-1.53768	-1.45145	-1.51028	-1.49361	-1.55013	-1.37558	-1.53555	-1.39998	-1.50359
75367	4930552N02Rik	NA	NA	NA	NA	NA	NA	NA	NA	NA	NA	NA	NA	NA	NA	NA	NA	0	0	0	0	0	0	0	0	0	0
77594	4930552P12Rik	NA	-0.37627	0.364833	0.634342	-0.0443209	0.932253	NA	-0.940694	0.056528	0.246762	-0.545804	0.232045	0.498548	0.307153	0.479835	0.679858	3.36638	3.56395	3.24638	3.27455	3.36885	3.7325	3.43705	3.86098	3.71787	3.55716
75247	4930553E22Rik	NA	NA	NA	NA	NA	NA	NA	NA	NA	NA	NA	NA	NA	NA	NA	NA	0	0	0	0	0	0	0	0	0	0
75351	4930553J12Rik	NA	NA	NA	NA	NA	NA	NA	NA	NA	NA	NA	NA	NA	NA	NA	NA	0	0	0	0	0	0	0	0	0	0
75253	4930554C24Rik	NA	NA	NA	NA	NA	NA	NA	NA	NA	NA	NA	NA	NA	NA	NA	NA	0	0	0	0	0	0	0	0	0	0
100504653	4930555A03Rik	NA	-0.0303581	0.885282	0.948644	-0.47278	0.127528	0.250673	-0.220141	0.747178	NA	-0.0765523	0.938292	NA	-0.259634	0.60227	0.773238	5.33205	5.35918	4.59402	4.87205	3.22868	3.3133	3.07534	3.15018	3.62384	3.72391
75279	4930555B11Rik	NA	NA	NA	NA	NA	NA	NA	NA	NA	NA	-0.675316	0.848446	NA	NA	NA	NA	-2.40143	-2.40172	-2.39736	-2.39763	-2.39499	-2.39489	-2.39332	-2.38354	-2.39668	-2.39657
75359	4930555F03Rik	NA	NA	NA	NA	NA	NA	NA	NA	NA	NA	NA	NA	NA	NA	NA	NA	0	0	0	0	0	0	0	0	0	0
108978	4930555G01Rik	ENSMUSG00000096197	NA	NA	NA	NA	NA	NA	NA	NA	NA	NA	NA	NA	NA	NA	NA	0	0	0	0	0	0	0	0	0	0
75310	4930556C24Rik	NA	NA	NA	NA	NA	NA	NA	NA	NA	NA	NA	NA	NA	NA	NA	NA	0	0	0	0	0	0	0	0	0	0
75332	4930556G01Rik	NA	NA	NA	NA	NA	NA	NA	NA	NA	NA	NA	NA	NA	NA	NA	NA	0	0	0	0	0	0	0	0	0	0
75349	4930556J02Rik	NA	NA	NA	NA	-1.29589	0.712184	NA	0.623446	0.859961	NA	NA	NA	NA	-0.735979	0.83502	NA	-2.20126	-2.202	-2.19058	-2.14387	-2.16066	-2.18411	-2.17998	-2.17806	-2.18879	-2.1648
75342	4930556J24Rik	NA	0.459523	0.623463	NA	1.54559	0.306698	NA	0.747874	0.466279	NA	-0.6745	0.535845	NA	0.647471	0.606876	NA	1.22772	1.03309	1.05924	0.794161	1.32849	1.13326	1.10062	1.29481	1.04746	0.930156
75283	4930556L07Rik	NA	NA	NA	NA	NA	NA	NA	NA	NA	NA	NA	NA	NA	NA	NA	NA	0	0	0	0	0	0	0	0	0	0
75259	4930556M19Rik	NA	0.376806	0.309646	0.584443	1.16631	0.0189458	0.0773493	-0.167177	0.779823	NA	0.616175	0.493322	NA	0.782928	0.25566	NA	3.54577	3.30108	3.4445	2.8173	2.72724	2.93626	2.74674	2.42754	2.91067	2.5752
75301	4930556N09Rik	NA	NA	NA	NA	NA	NA	NA	NA	NA	NA	NA	NA	NA	NA	NA	NA	0	0	0	0	0	0	0	0	0	0
75357	4930557J02Rik	NA	0.661271	0.836337	NA	-0.0292052	0.990575	NA	0.623446	0.859961	NA	NA	NA	NA	NA	NA	NA	-1.86468	-1.9045	-1.84728	-1.84842	-1.87577	-1.91397	-1.90725	-1.90412	-1.9216	-1.92114
67654	4930558C23Rik	NA	NA	NA	NA	NA	NA	NA	NA	NA	NA	NA	NA	NA	-0.735979	0.83502	NA	-2.40068	-2.40093	-2.39715	-2.39738	-2.3951	-2.39501	-2.39365	-2.39301	-2.39656	-2.38863
75274	4930558G05Rik	NA	NA	NA	NA	NA	NA	NA	NA	NA	NA	NA	NA	NA	NA	NA	NA	0	0	0	0	0	0	0	0	0	0
75323	4930558J18Rik	NA	-0.220734	0.564419	0.776527	0.276553	0.511004	0.646922	0.686508	0.265186	NA	1.52534	0.337247	NA	-1.22235	0.403862	NA	3.22297	3.37417	3.21361	3.03024	2.88443	2.63894	2.29014	1.88696	1.83585	2.0682
75368	4930558K02Rik	ENSMUSG00000086277	0.734173	0.835418	NA	0.715035	0.83965	NA	-0.819222	0.816674	NA	NA	NA	NA	NA	NA	NA	-2.24828	-2.26718	-2.24002	-2.25889	-2.25354	-2.23501	-2.25015	-2.24867	-2.25697	-2.25674
75303	4930562A09Rik	NA	NA	NA	NA	NA	NA	NA	NA	NA	NA	NA	NA	NA	NA	NA	NA	0	0	0	0	0	0	0	0	0	0
78809	4930562C15Rik	ENSMUSG00000022518	0.443565	0.485796	NA	0.355057	0.556838	NA	1.93514	0.549281	NA	-0.690436	0.584091	NA	0.396453	0.534905	NA	2.20722	1.96645	2.17049	1.98721	1.31604	1.12768	1.56952	1.7268	2.21276	2.01827
75255	4930562F07Rik	NA	-0.392033	0.741172	NA	0.639936	0.538298	NA	0.147515	0.91533	NA	-0.675316	0.848446	NA	-0.735979	0.83502	NA	-0.0143114	0.062004	0.255133	0.0800523	0.0555271	0.00209967	-0.333586	-0.251993	-0.35569	-0.282531
75370	4930563E18Rik	NA	1.16375	0.534015	NA	NA	NA	NA	0.623446	0.859961	NA	NA	NA	NA	NA	NA	NA	-1.87435	-1.93917	-1.98762	-1.98856	-1.94734	-1.9789	-1.97335	-1.97076	-1.98521	-1.98482
75304	4930563E22Rik	ENSMUSG00000053574	0.559242	0.233936	0.509963	-0.359046	0.679343	NA	0.474863	0.685632	NA	1.58168	0.05906	NA	0.10504	0.887731	NA	2.8855	2.55855	1.88395	2.00565	2.04406	1.73045	2.35376	1.9152	2.33894	2.21184
75369	4930563F08Rik	NA	NA	NA	NA	NA	NA	NA	NA	NA	NA	NA	NA	NA	NA	NA	NA	0	0	0	0	0	0	0	0	0	0
78213	4930563M20Rik	NA	NA	NA	NA	NA	NA	NA	NA	NA	NA	NA	NA	NA	NA	NA	NA	0	0	0	0	0	0	0	0	0	0
75258	4930563M21Rik	ENSMUSG00000050702	-0.90458	0.151665	NA	-2.35185	0.214367	NA	-2.56168	0.303483	NA	-0.482366	0.856671	NA	-1.84163	0.28548	NA	0.84873	1.28036	0.0849088	0.390274	0.0327356	0.324825	0.126021	0.215937	0.163904	0.453626
75341	4930564C03Rik	NA	NA	NA	NA	NA	NA	NA	NA	NA	NA	NA	NA	NA	NA	NA	NA	0	0	0	0	0	0	0	0	0	0
75269	4930564D02Rik	ENSMUSG00000051788	NA	NA	NA	0.715035	0.83965	NA	NA	NA	NA	NA	NA	NA	NA	NA	NA	-2.40007	-2.40028	-2.39014	-2.39718	-2.39519	-2.39511	-2.39392	-2.39337	-2.39647	-2.39638
75309	4930565D16Rik	NA	NA	NA	NA	NA	NA	NA	NA	NA	NA	NA	NA	NA	NA	NA	NA	0	0	0	0	0	0	0	0	0	0
68306	4930565N06Rik	NA	-0.585961	0.590372	NA	1.212	0.267556	NA	1.26098	0.228914	NA	0.343324	0.662699	NA	1.58028	0.0303224	NA	1.45239	1.55885	1.96268	1.55165	2.0924	1.60709	2.24273	2.12752	2.4817	1.73722
75930	4930567H12Rik	NA	0.734173	0.835418	NA	-0.727633	0.836864	NA	NA	NA	NA	NA	NA	NA	0.706689	0.841496	NA	-2.24853	-2.26597	-2.25782	-2.24141	-2.25339	-2.25321	-2.25026	-2.24889	-2.23963	-2.25634
619303	4930567H17Rik	ENSMUSG00000073141	NA	NA	NA	NA	NA	NA	NA	NA	NA	NA	NA	NA	NA	NA	NA	0	0	0	0	0	0	0	0	0	0
78221	4930567J20Rik	NA	NA	NA	NA	NA	NA	NA	NA	NA	NA	NA	NA	NA	NA	NA	NA	0	0	0	0	0	0	0	0	0	0
78056	4930567K20Rik	NA	NA	NA	NA	NA	NA	NA	NA	NA	NA	NA	NA	NA	NA	NA	NA	0	0	0	0	0	0	0	0	0	0
75859	4930568D16Rik	ENSMUSG00000026882	0.734173	0.835418	NA	-0.727633	0.836864	NA	NA	NA	NA	NA	NA	NA	NA	NA	NA	-2.32052	-2.33222	-2.32676	-2.31575	-2.32378	-2.32366	-2.32168	-2.32076	-2.3259	-2.32576
78219	4930568E12Rik	NA	NA	NA	NA	NA	NA	NA	NA	NA	NA	NA	NA	NA	NA	NA	NA	0	0	0	0	0	0	0	0	0	0
75857	4930568G15Rik	NA	NA	NA	NA	NA	NA	NA	NA	NA	NA	NA	NA	NA	NA	NA	NA	0	0	0	0	0	0	0	0	0	0
78812	4930570E03Rik	NA	NA	NA	NA	NA	NA	NA	NA	NA	NA	NA	NA	NA	NA	NA	NA	0	0	0	0	0	0	0	0	0	0
329782	4930570G19Rik	NA	0.742442	0.613724	NA	0.739336	0.668343	NA	1.21247	0.506143	NA	-1.84699	0.485421	NA	0.985291	0.698602	NA	-0.285654	-0.385613	-0.326112	-0.445123	-0.369471	-0.489176	-0.559761	-0.345653	-0.448962	-0.581247
75861	4930571K23Rik	ENSMUSG00000090457	NA	NA	NA	NA	NA	NA	NA	NA	NA	NA	NA	NA	NA	NA	NA	0	0	0	0	0	0	0	0	0	0
75916	4930572K03Rik	NA	NA	NA	NA	NA	NA	NA	NA	NA	NA	NA	NA	NA	NA	NA	NA	0	0	0	0	0	0	0	0	0	0
381715	4930572O03Rik	NA	NA	NA	NA	NA	NA	NA	NA	NA	NA	NA	NA	NA	NA	NA	NA	0	0	0	0	0	0	0	0	0	0
75862	4930572O13Rik	NA	NA	NA	NA	NA	NA	NA	NA	NA	NA	NA	NA	NA	NA	NA	NA	0	0	0	0	0	0	0	0	0	0
100504454	4930573C08Rik	NA	0.734173	0.835418	NA	NA	NA	NA	NA	NA	NA	NA	NA	NA	NA	NA	NA	-2.39355	-2.3997	-2.39683	-2.39701	-2.39527	-2.3952	-2.39416	-2.39368	-2.39638	-2.39631
78049	4930573O16Rik	NA	-0.768517	0.723521	NA	0.129432	0.916525	NA	-1.02231	0.508198	NA	1.20687	0.489501	NA	1.32351	0.438177	NA	-0.212881	-0.169222	0.0702001	0.0520006	0.140814	0.198921	-0.0668187	-0.12281	0.0369	-0.169185
75905	4930578C19Rik	ENSMUSG00000037358	NA	NA	NA	NA	NA	NA	NA	NA	NA	NA	NA	NA	NA	NA	NA	0	0	0	0	0	0	0	0	0	0
78058	4930578E11Rik	NA	0.0223353	0.994954	NA	NA	NA	NA	-0.0978839	0.977902	NA	NA	NA	NA	-0.735979	0.83502	NA	-2.10788	-2.10876	-2.12326	-2.12409	-2.08794	-2.08764	-2.11075	-2.10848	-2.12115	-2.09282
67750	4930578I06Rik	ENSMUSG00000021961	NA	NA	NA	NA	NA	NA	NA	NA	NA	NA	NA	NA	NA	NA	NA	0	0	0	0	0	0	0	0	0	0
75951	4930578M01Rik	NA	-0.255158	0.799338	NA	-1.95719	0.1106	NA	-0.577727	0.616184	NA	2.26552	0.146955	NA	0.932998	0.375099	NA	0.839984	0.900649	0.603848	1.04416	0.928657	0.955637	0.91242	0.593044	1.13122	0.869435
78215	4930578N18Rik	NA	NA	NA	NA	NA	NA	NA	NA	NA	NA	NA	NA	NA	NA	NA	NA	0	0	0	0	0	0	0	0	0	0
319213	4930579C12Rik	NA	-0.708495	0.841097	NA	NA	NA	NA	2.4912	0.361902	NA	1.99397	0.502935	NA	0.706689	0.841496	NA	-1.82477	-1.77501	-1.80163	-1.80315	-1.5313	-1.78761	-1.62455	-1.77449	-1.74638	-1.79713
75934	4930579D07Rik	NA	0.734173	0.835418	NA	NA	NA	NA	-0.819222	0.816674	NA	NA	NA	NA	NA	NA	NA	-2.32007	-2.33344	-2.32719	-2.32758	-2.32379	-2.31069	-2.3214	-2.32035	-2.32622	-2.32606
67741	4930579F01Rik	ENSMUSG00000012042	NA	NA	NA	NA	NA	NA	NA	NA	NA	NA	NA	NA	NA	NA	NA	0	0	0	0	0	0	0	0	0	0
75913	4930579G18Rik	NA	0.464641	0.0904376	0.313415	0.788781	0.000260055	0.0069853	0.635474	0.00425731	0.0568185	0.14686	0.456114	0.711749	0.50577	0.00479392	0.0307648	6.25349	5.91694	6.29656	5.78917	6.40504	5.94772	6.48964	6.45664	6.59078	6.25577
75939	4930579G24Rik	ENSMUSG00000027811	-0.0679807	0.508803	0.742398	-0.0987785	0.5158	0.651041	0.0242324	0.900944	0.957273	-0.0825946	0.823524	0.92719	0.0524943	0.832256	0.915683	8.18322	8.22909	8.08741	8.14991	6.64124	6.95468	5.99514	5.70802	6.40432	6.35674
75881	4930579K19Rik	NA	-0.594322	0.116393	0.358086	-0.957602	0.0985243	NA	-0.395381	0.555288	NA	-0.109368	0.831704	0.930867	0.129057	0.785495	0.88939	3.54071	3.86908	2.91115	3.32592	3.04501	3.11738	3.32747	3.48797	3.47153	3.39213
78934	4930581F22Rik	NA	0.356813	0.193657	0.463642	0.256284	0.561887	0.688761	0.0848591	0.801529	0.911581	-0.150474	0.551321	0.776294	0.369957	0.131889	0.3065	5.05001	4.81866	4.46884	4.33132	4.90329	4.7107	5.24151	5.49486	5.42106	5.17249
78057	4930583I09Rik	ENSMUSG00000024088	NA	NA	NA	-1.29589	0.712184	NA	NA	NA	NA	0.767352	0.828094	NA	NA	NA	NA	-2.26788	-2.26851	-2.25893	-2.21975	-2.23383	-2.2535	-2.25004	-2.24842	-2.25743	-2.25718
67745	4930583K01Rik	NA	-0.708495	0.841097	NA	-1.29399	0.712541	NA	NA	NA	NA	0.0460226	0.989579	NA	0.706689	0.841496	NA	-2.07351	-2.04037	-2.0581	-1.9907	-2.01492	-2.04876	-2.04281	-2.00582	-2.02131	-2.05511
75946	4930583P06Rik	NA	NA	NA	NA	NA	NA	NA	NA	NA	NA	NA	NA	NA	NA	NA	NA	0	0	0	0	0	0	0	0	0	0
75942	4930584F24Rik	NA	NA	NA	NA	NA	NA	NA	NA	NA	NA	NA	NA	NA	NA	NA	NA	0	0	0	0	0	0	0	0	0	0
67740	4930588J15Rik	NA	NA	NA	NA	NA	NA	NA	NA	NA	NA	NA	NA	NA	NA	NA	NA	0	0	0	0	0	0	0	0	0	0
619305	4930588K23Rik	NA	NA	NA	NA	NA	NA	NA	NA	NA	NA	NA	NA	NA	NA	NA	NA	0	0	0	0	0	0	0	0	0	0
75879	4930589L23Rik	NA	0.119095	0.617485	0.813982	0.0657896	0.833903	0.893488	-0.493309	0.41979	NA	-0.994537	0.0117157	0.0662742	-0.216375	0.51403	0.706336	5.00253	4.91924	4.90434	4.82314	3.76126	3.77523	4.0082	4.78042	4.70058	4.83596
67748	4930589P08Rik	NA	NA	NA	NA	NA	NA	NA	NA	NA	NA	NA	NA	NA	NA	NA	NA	0	0	0	0	0	0	0	0	0	0
381798	4930590J08Rik	ENSMUSG00000034063	-0.877217	0.370076	NA	2.53125	0.087528	NA	-0.497325	0.765329	NA	-1.59325	0.494635	NA	-0.457793	0.657273	NA	0.495082	0.738739	0.753508	0.250777	0.435754	0.467397	0.23772	0.43652	0.646892	0.783912
75910	4930590L20Rik	NA	NA	NA	NA	NA	NA	NA	NA	NA	NA	NA	NA	NA	NA	NA	NA	0	0	0	0	0	0	0	0	0	0
68175	4930591A17Rik	ENSMUSG00000039138	NA	NA	NA	NA	NA	NA	NA	NA	NA	NA	NA	NA	NA	NA	NA	0	0	0	0	0	0	0	0	0	0
75880	4930592A05Rik	NA	-0.226394	0.858291	NA	1.49599	0.373533	NA	-0.0978839	0.977902	NA	-1.92084	0.475038	NA	-0.194017	0.931869	NA	-0.505148	-0.497551	-0.469015	-0.705611	-0.760802	-0.760451	-0.823185	-0.582405	-0.702865	-0.695378
75853	4930592I03Rik	NA	1.05158	0.496134	NA	-0.896103	0.36174	NA	2.9602	0.186057	NA	0.770411	0.775382	NA	-0.660554	0.811902	NA	-0.090187	-0.276091	0.0444517	0.386622	-0.113686	-0.412046	-0.135866	-0.314834	-0.350377	-0.276914
71301	4930593A02Rik	NA	0.978683	0.377691	NA	0.839699	0.509709	NA	-0.873962	0.427158	NA	0.843023	0.452025	NA	-0.0355638	0.971012	NA	1.17504	0.837454	0.967401	0.794445	0.779982	1.17427	1.51959	1.08628	1.19653	1.17303
78060	4930593C16Rik	NA	1.30122	0.711114	NA	NA	NA	NA	NA	NA	NA	NA	NA	NA	NA	NA	NA	-2.30916	-2.33223	-2.32676	-2.32709	-2.32378	-2.32366	-2.32168	-2.32076	-2.3259	-2.32576
77633	4930594C11Rik	NA	0.321804	0.533272	0.756466	-0.0190544	0.964503	0.978448	0.00568677	0.989705	0.996256	0.298359	0.416306	0.680886	0.475939	0.258881	0.467232	3.52585	3.37361	3.87132	3.86538	4.39224	4.21764	4.31569	4.29462	3.96803	3.70603
245492	4930595M18Rik	ENSMUSG00000060673	NA	NA	NA	NA	NA	NA	NA	NA	NA	-0.675316	0.848446	NA	NA	NA	NA	-2.40143	-2.40171	-2.39736	-2.39762	-2.39499	-2.39489	-2.39332	-2.38356	-2.39668	-2.39657
239036	4930596D02Rik	ENSMUSG00000041068	NA	NA	NA	NA	NA	NA	NA	NA	NA	NA	NA	NA	NA	NA	NA	0	0	0	0	0	0	0	0	0	0
75377	4930597G03Rik	NA	NA	NA	NA	NA	NA	NA	NA	NA	NA	NA	NA	NA	NA	NA	NA	0	0	0	0	0	0	0	0	0	0
75373	4930597O21Rik	NA	-0.216507	0.601979	0.804245	-0.220596	0.594452	0.715682	-0.323464	0.412909	0.672094	-0.390302	0.138474	0.366542	-0.29295	0.317221	0.528851	3.96518	4.06205	4.12948	4.21307	5.0589	5.2388	5.18531	5.4225	5.04942	5.24394
75381	4930598F16Rik	NA	NA	NA	NA	NA	NA	NA	NA	NA	NA	NA	NA	NA	NA	NA	NA	0	0	0	0	0	0	0	0	0	0
75379	4930599N23Rik	NA	-0.0772212	0.790484	0.907421	-0.196445	0.569104	0.694303	0.221303	0.411259	0.670803	-0.321845	0.061988	0.215165	-0.104035	0.585408	0.760204	5.06271	5.10969	4.82179	4.9055	6.15231	6.04686	6.45259	6.68129	6.10455	6.17217
70936	4931400O07Rik	NA	NA	NA	NA	NA	NA	NA	NA	NA	NA	NA	NA	NA	NA	NA	NA	0	0	0	0	0	0	0	0	0	0
70933	4931402G19Rik	NA	-0.578941	0.654241	NA	0.484711	0.820264	NA	-1.28816	0.618011	NA	1.77483	0.39933	NA	1.17621	0.540844	NA	-0.263193	-0.147985	-0.417012	-0.475338	-0.446168	-0.388797	-0.364675	-0.506086	-0.287169	-0.480131
70942	4931403E22Rik	NA	-0.15692	0.846377	NA	0.739689	0.471985	NA	-1.56211	0.658106	NA	NA	NA	NA	2.40422	0.13838	NA	0.747336	0.786299	0.880897	0.566683	0.0628838	0.215109	0.0777234	0.0842549	0.633915	0.196194
70934	4931403G20Rik	NA	2.32014	0.222518	NA	-1.34475	0.701572	NA	1.62592	0.347027	NA	0.688309	0.818254	NA	3.38525	0.0566848	NA	-0.560965	-0.861119	-0.903858	-0.767931	-0.529746	-0.734479	-0.644536	-0.78919	-0.370651	-0.899769
70955	4931403M11Rik	NA	NA	NA	NA	NA	NA	NA	NA	NA	NA	NA	NA	NA	NA	NA	NA	0	0	0	0	0	0	0	0	0	0
74054	4931406B18Rik	ENSMUSG00000013353	1.465	0.678269	NA	-1.62751	0.624773	NA	-0.819222	0.816674	NA	-1.43156	0.540066	NA	1.9345	0.543182	NA	-1.4611	-1.58138	-1.55243	-1.37693	-1.53667	-1.47593	-1.46547	-1.28066	-1.36787	-1.54717
70984	4931406C07Rik	ENSMUSG00000031938	-0.0729899	0.313981	0.588079	-0.0746701	0.409124	0.555082	-0.0445436	0.686521	0.846232	-0.0739682	0.500788	0.742189	-0.0352079	0.708553	0.840965	9.74852	9.79104	9.69324	9.72337	9.46215	9.48743	9.33228	9.38943	9.40971	9.42883
77592	4931406H21Rik	NA	0.623153	0.177501	0.44203	0.368046	0.3872	0.534955	0.784458	0.239973	NA	-0.0503414	0.936257	NA	-0.606137	0.204722	0.404826	3.56004	3.19869	4.11842	3.80622	3.27752	2.97403	3.2421	3.25705	3.35652	3.68259
233103	4931406P16Rik	ENSMUSG00000066571	0.509674	0.118245	0.360899	1.46238	0.00132705	0.0180188	0.455607	0.209843	0.47806	0.0803875	0.690361	0.862461	0.629712	0.161539	0.349399	6.4692	6.10672	7.06915	6.06502	7.20385	6.7083	7.28584	7.34799	7.14233	6.79214
210940	4931408C20Rik	ENSMUSG00000073722	1.21582	0.640444	NA	1.25499	0.720946	NA	-0.819222	0.816674	NA	NA	NA	NA	-1.359	0.698509	NA	-1.75289	-1.83763	-1.77582	-1.86049	-1.84831	-1.80615	-1.8406	-1.83722	-1.85611	-1.77216
77059	4931408D14Rik	NA	-1.66486	0.234444	NA	1.61549	0.348034	NA	-0.126531	0.930578	NA	-1.35124	0.359617	NA	-2.98101	0.122883	NA	0.0990389	0.352919	0.222603	-0.0197431	0.20903	0.247343	0.0934145	0.426616	-0.149788	0.256664
231045	4931409K22Rik	ENSMUSG00000038199	-0.708495	0.841097	NA	-0.77766	0.77675	NA	1.89639	0.493436	NA	-0.675316	0.848446	NA	-0.01464	0.996694	NA	-1.8211	-1.77367	-1.75009	-1.70258	-1.68829	-1.78568	-1.7282	-1.72423	-1.74639	-1.7458
74359	4931414P19Rik	ENSMUSG00000022179	0.140934	0.314909	0.588624	-0.132966	0.471955	0.613019	0.121395	0.519684	0.748118	-0.252193	0.0902932	0.278083	0.0894045	0.510186	0.703524	7.10749	7.00901	6.58702	6.64927	7.02404	6.90445	7.23657	7.4623	7.29352	7.23047
66740	4931417E11Rik	ENSMUSG00000056197	NA	NA	NA	NA	NA	NA	NA	NA	NA	NA	NA	NA	NA	NA	NA	0	0	0	0	0	0	0	0	0	0
70970	4931419H13Rik	NA	NA	NA	NA	NA	NA	NA	NA	NA	NA	NA	NA	NA	NA	NA	NA	0	0	0	0	0	0	0	0	0	0
70972	4931420L22Rik	NA	NA	NA	NA	NA	NA	NA	NA	NA	NA	NA	NA	NA	NA	NA	NA	0	0	0	0	0	0	0	0	0	0
70986	4931422A03Rik	ENSMUSG00000046085	-0.165859	0.803998	NA	1.75878	0.187835	NA	1.07105	0.235922	NA	-0.491476	0.562515	NA	1.13056	0.183614	NA	1.99772	2.02331	1.68452	1.30259	1.81	1.63025	1.9736	2.00951	2.15309	1.64905
70981	4931423N10Rik	ENSMUSG00000026774	1.44178	0.45977	NA	-1.12616	0.528359	NA	0.624181	0.824862	NA	-1.95672	0.508064	NA	-1.23306	0.58759	NA	-0.835195	-1.00624	-0.973118	-0.82406	-0.940813	-1.01234	-1.07261	-0.848893	-1.02915	-0.88205
74356	4931428F04Rik	ENSMUSG00000014837	-0.0497215	0.837293	0.92892	0.408996	0.182659	0.318821	-0.142027	0.58615	0.787718	0.387055	0.198481	0.457786	0.44613	0.0657644	0.194047	5.53855	5.55127	5.9271	5.61157	5.5478	5.58259	5.51379	5.33248	5.86572	5.58986
70988	4931428L18Rik	NA	-0.708495	0.841097	NA	NA	NA	NA	NA	NA	NA	NA	NA	NA	NA	NA	NA	-2.39938	-2.39382	-2.39679	-2.39696	-2.39529	-2.39522	-2.39423	-2.39376	-2.39636	-2.39629
74361	4931429L15Rik	ENSMUSG00000056617	0.533877	0.850038	NA	1.00416	0.553038	NA	-0.819222	0.816674	NA	-0.62431	0.834757	NA	0.718719	0.796615	NA	-1.34044	-1.40138	-1.17901	-1.30655	-1.35105	-1.35037	-1.40227	-1.27149	-1.29995	-1.36202
70971	4931429P17Rik	NA	NA	NA	NA	NA	NA	NA	NA	NA	NA	NA	NA	NA	NA	NA	NA	0	0	0	0	0	0	0	0	0	0
74363	4931430N09Rik	NA	NA	NA	NA	NA	NA	NA	NA	NA	NA	NA	NA	NA	NA	NA	NA	0	0	0	0	0	0	0	0	0	0
70973	4931431B13Rik	NA	NA	NA	NA	-1.30315	0.710612	NA	NA	NA	NA	NA	NA	NA	0.706689	0.841496	NA	-2.26677	-2.26735	-2.25842	-2.22192	-2.25356	-2.25336	-2.25014	-2.24864	-2.2385	-2.2568
74364	4931431C16Rik	NA	0.129323	0.733845	0.875728	1.83966	0.000807184	0.0141269	0.182731	0.824447	NA	-0.601847	0.539753	NA	0.0649791	0.931752	NA	3.46598	3.35875	3.60088	2.56523	2.83927	2.70292	2.36632	2.52979	2.53212	2.52262
216622	4931440F15Rik	ENSMUSG00000078157	-0.417078	0.42972	NA	0.535333	0.536318	NA	1.00989	0.452556	NA	-0.304789	0.857469	NA	-0.199306	0.859127	NA	2.02587	2.23315	1.90122	1.67368	1.39305	1.18069	1.21523	1.23624	1.34901	1.4249
71000	4931440J10Rik	NA	-1.24245	0.402275	NA	0.494339	0.815597	NA	-0.0798533	0.981953	NA	0.767352	0.828094	NA	1.60493	0.610315	NA	-1.08634	-0.86357	-1.04651	-1.10198	-1.2156	-1.14661	-1.06714	-1.19744	-1.03857	-1.22752
71004	4931440P22Rik	NA	-0.305944	0.0918926	0.31643	-0.065278	0.793405	0.86495	0.0552067	0.756911	0.885631	-0.170083	0.397021	0.664778	0.23126	0.274435	0.485072	5.98556	6.1685	6.02604	6.04959	6.8391	6.9414	6.57171	6.54846	6.24208	6.0974
237029	4932411N23Rik	ENSMUSG00000058670	NA	NA	NA	NA	NA	NA	NA	NA	NA	0.767352	0.828094	NA	NA	NA	NA	-2.40165	-2.40195	-2.39742	-2.3977	-2.39496	-2.39486	-2.38382	-2.39246	-2.39671	-2.3966
75722	4932412D23Rik	NA	0.734173	0.835418	NA	-0.727633	0.836864	NA	0.623446	0.859961	NA	-0.675316	0.848446	NA	-1.49406	0.671953	NA	-2.03935	-2.07497	-2.05833	-2.02481	-2.01472	-2.0489	-2.04288	-2.00554	-2.05572	-1.98622
319215	4932413F04Rik	NA	NA	NA	NA	0.715035	0.83965	NA	NA	NA	NA	NA	NA	NA	NA	NA	NA	-2.40008	-2.4003	-2.39012	-2.39719	-2.39518	-2.39511	-2.39391	-2.39336	-2.39647	-2.39638
237694	4932414J04Rik	NA	0.734173	0.835418	NA	NA	NA	NA	NA	NA	NA	NA	NA	NA	NA	NA	NA	-2.39389	-2.39911	-2.39667	-2.39682	-2.39535	-2.39529	-2.39441	-2.394	-2.39629	-2.39623
75721	4932414N04Rik	ENSMUSG00000079324	NA	NA	NA	NA	NA	NA	-1.39353	0.691653	NA	0.767352	0.828094	NA	NA	NA	NA	-2.26916	-2.26983	-2.2595	-2.26014	-2.25388	-2.21078	-2.22848	-2.24818	-2.25788	-2.25762
211496	4932415M13Rik	NA	NA	NA	NA	NA	NA	NA	NA	NA	NA	NA	NA	NA	NA	NA	NA	0	0	0	0	0	0	0	0	0	0
442809	4932416K20Rik	NA	NA	NA	NA	0.715035	0.83965	NA	NA	NA	NA	0.767352	0.828094	NA	NA	NA	NA	-2.33411	-2.33456	-2.31314	-2.32803	-2.32381	-2.32365	-2.30668	-2.31996	-2.32651	-2.32633
74366	4932422M17Rik	NA	0.328137	0.404049	0.666222	0.457255	0.120425	0.241711	0.583699	0.0251318	0.16092	-0.0267543	0.900882	0.962224	0.536587	0.00179858	0.0147953	7.36103	7.07367	5.91047	5.64984	6.51103	6.01045	6.79191	6.95843	7.28671	6.92678
245509	4932429P05Rik	ENSMUSG00000079513	NA	NA	NA	NA	NA	NA	NA	NA	NA	NA	NA	NA	NA	NA	NA	0	0	0	0	0	0	0	0	0	0
619557	4932431L22Rik	NA	NA	NA	NA	NA	NA	NA	NA	NA	NA	NA	NA	NA	NA	NA	NA	0	0	0	0	0	0	0	0	0	0
114675	4932431P20Rik	NA	1.30565	0.710156	NA	NA	NA	NA	NA	NA	NA	0.767352	0.828094	NA	NA	NA	NA	-2.22979	-2.26729	-2.2584	-2.25894	-2.25356	-2.25336	-2.23168	-2.24864	-2.25701	-2.25678
319819	4932435O22Rik	NA	NA	NA	NA	NA	NA	NA	NA	NA	NA	NA	NA	NA	NA	NA	NA	0	0	0	0	0	0	0	0	0	0
229227	4932438A13Rik	ENSMUSG00000037270	0.189712	0.124647	0.369903	0.436103	0.0210153	0.0819133	0.132237	0.27253	0.547445	-0.148694	0.211621	0.47272	0.396618	0.00555853	0.0344712	10.3921	10.2649	10.6409	10.3381	11.0289	10.6455	11.5231	11.9408	11.2689	11.0046
74387	4932438H23Rik	ENSMUSG00000039851	-1.05992	0.283642	NA	0.652742	0.48391	NA	-0.702514	0.372884	NA	-0.570957	0.625967	NA	1.68471	0.353978	NA	0.945547	1.2421	1.30832	1.09461	1.19253	1.59825	1.20144	1.25404	1.02139	0.755155
319216	4932441J04Rik	NA	0.7758	0.195327	NA	0.680265	0.258658	NA	0.245423	0.640416	0.820134	-0.0806861	0.890957	0.957945	-0.161583	0.827206	NA	2.92226	2.56338	3.18374	2.86902	3.29202	3.35028	3.37742	3.12553	2.8506	2.93575
78899	4932443L11Rik	NA	-0.280936	0.731026	NA	1.04787	0.299207	NA	-0.0740829	0.951916	NA	0.10939	0.918877	NA	-0.895222	0.432754	NA	1.29763	1.38716	1.42354	1.11942	1.0144	1.12109	1.42295	1.33267	1.04009	1.25891
73326	4932702P03Rik	NA	-0.708495	0.841097	NA	NA	NA	NA	NA	NA	NA	NA	NA	NA	NA	NA	NA	-2.39915	-2.39394	-2.39673	-2.39689	-2.39532	-2.39526	-2.39432	-2.39389	-2.39632	-2.39626
66747	4933400A11Rik	ENSMUSG00000094981	NA	NA	NA	NA	NA	NA	NA	NA	NA	NA	NA	NA	NA	NA	NA	0	0	0	0	0	0	0	0	0	0
71052	4933400B14Rik	NA	NA	NA	NA	NA	NA	NA	NA	NA	NA	NA	NA	NA	-0.735979	0.83502	NA	-2.4003	-2.40053	-2.39705	-2.39726	-2.39515	-2.39507	-2.39382	-2.39323	-2.3965	-2.38919
331003	4933400C23Rik	NA	NA	NA	NA	NA	NA	NA	NA	NA	NA	NA	NA	NA	NA	NA	NA	0	0	0	0	0	0	0	0	0	0
74403	4933400F21Rik	NA	-0.299917	0.648441	NA	-0.837479	0.158759	NA	0.691535	0.750501	NA	0.585597	0.843884	NA	0.486096	0.764401	NA	1.74516	1.87615	1.98175	2.44581	0.933318	0.922788	1.02004	0.896953	1.10624	1.03432
71058	4933400L20Rik	NA	NA	NA	NA	NA	NA	NA	NA	NA	NA	NA	NA	NA	NA	NA	NA	0	0	0	0	0	0	0	0	0	0
71011	4933401B06Rik	NA	NA	NA	NA	-0.727633	0.836864	NA	NA	NA	NA	NA	NA	NA	NA	NA	NA	-2.39988	-2.40008	-2.39693	-2.39058	-2.39521	-2.39514	-2.394	-2.39347	-2.39644	-2.39636
71008	4933401D09Rik	NA	1.9826	0.475443	NA	-0.727633	0.836864	NA	0.376712	0.910182	NA	0.0460236	0.989361	NA	NA	NA	NA	-1.74913	-1.88282	-1.86157	-1.81877	-1.71769	-1.80543	-1.84185	-1.79417	-1.85824	-1.85771
71038	4933401H06Rik	NA	NA	NA	NA	0.715035	0.83965	NA	-0.0978839	0.977902	NA	NA	NA	NA	NA	NA	NA	-2.26857	-2.26922	-2.23852	-2.25985	-2.23308	-2.23286	-2.24997	-2.24829	-2.25767	-2.25742
71029	4933402C06Rik	ENSMUSG00000102004	NA	NA	NA	NA	NA	NA	NA	NA	NA	NA	NA	NA	NA	NA	NA	0	0	0	0	0	0	0	0	0	0
74426	4933402D24Rik	ENSMUSG00000025961	0.610281	0.753649	NA	-0.477354	0.72438	NA	0.908311	0.71853	NA	0.0243324	0.990356	NA	2.30026	0.354239	NA	-0.495979	-0.583184	-0.384013	-0.301405	-0.488756	-0.626641	-0.462919	-0.459047	-0.433777	-0.713394
74437	4933402E13Rik	ENSMUSG00000045330	NA	NA	NA	NA	NA	NA	NA	NA	NA	NA	NA	NA	NA	NA	NA	0	0	0	0	0	0	0	0	0	0
330820	4933402J07Rik	ENSMUSG00000069971	NA	NA	NA	NA	NA	NA	NA	NA	NA	NA	NA	NA	NA	NA	NA	0	0	0	0	0	0	0	0	0	0
71057	4933402J10Rik	NA	NA	NA	NA	NA	NA	NA	NA	NA	NA	NA	NA	NA	NA	NA	NA	0	0	0	0	0	0	0	0	0	0
74425	4933402J15Rik	NA	NA	NA	NA	NA	NA	NA	0.623446	0.859961	NA	-0.675316	0.848446	NA	NA	NA	NA	-2.33487	-2.33535	-2.32788	-2.32834	-2.30832	-2.32365	-2.32095	-2.30419	-2.32671	-2.32653
233918	4933402N03Rik	ENSMUSG00000013668	NA	NA	NA	NA	NA	NA	NA	NA	NA	NA	NA	NA	NA	NA	NA	0	0	0	0	0	0	0	0	0	0
545732	4933402N22Rik	ENSMUSG00000067848	NA	NA	NA	NA	NA	NA	NA	NA	NA	NA	NA	NA	0.706689	0.841496	NA	-2.40008	-2.4003	-2.39699	-2.39719	-2.39518	-2.39511	-2.39391	-2.39336	-2.38959	-2.39638
71030	4933403O08Rik	ENSMUSG00000079460	NA	NA	NA	NA	NA	NA	-0.819222	0.816674	NA	NA	NA	NA	NA	NA	NA	-2.40051	-2.40075	-2.39711	-2.39733	-2.39512	-2.38747	-2.39372	-2.39311	-2.39654	-2.39644
74066	4933404G15Rik	NA	-0.708495	0.841097	NA	NA	NA	NA	NA	NA	NA	NA	NA	NA	NA	NA	NA	-2.39938	-2.39382	-2.39679	-2.39696	-2.39529	-2.39522	-2.39423	-2.39376	-2.39636	-2.39629
74061	4933404K08Rik	NA	NA	NA	NA	NA	NA	NA	NA	NA	NA	NA	NA	NA	NA	NA	NA	0	0	0	0	0	0	0	0	0	0
66752	4933404O12Rik	NA	-0.311714	0.135957	0.386079	-0.189074	0.501914	0.638819	-0.657913	0.0164862	0.127303	-1.00601	0.00276613	0.0220038	0.00406437	0.989119	0.994424	6.87172	7.05887	6.64798	6.70609	5.58201	6.09856	5.31499	5.74863	5.74869	5.70629
74057	4933405D12Rik	NA	0.263254	0.88636	NA	0.30192	0.89679	NA	0.550232	0.797001	NA	0.789127	0.770141	NA	2.557	0.262159	NA	-0.900036	-0.915294	-0.873871	-0.943842	-0.830426	-0.917243	-0.890707	-0.957512	-0.736717	-1.06668
71056	4933405E24Rik	NA	NA	NA	NA	NA	NA	NA	NA	NA	NA	NA	NA	NA	NA	NA	NA	0	0	0	0	0	0	0	0	0	0
71046	4933405L10Rik	ENSMUSG00000013158	-0.634518	0.644075	NA	-0.39295	0.852148	NA	0.73654	0.773675	NA	2.00658	0.451792	NA	1.98559	0.523921	NA	-0.6146	-0.529151	-0.7867	-0.734395	-0.709692	-0.843582	-0.67356	-0.899402	-0.720393	-0.929255
243996	4933405O20Rik	ENSMUSG00000084234	NA	NA	NA	NA	NA	NA	NA	NA	NA	NA	NA	NA	NA	NA	NA	0	0	0	0	0	0	0	0	0	0
74076	4933406C10Rik	NA	-0.331406	0.632643	NA	-0.679762	0.498951	NA	0.689651	0.778631	NA	-0.0359179	0.97762	NA	0.24227	0.789696	NA	1.38595	1.55871	1.0757	1.25279	0.981472	0.790952	1.00179	1.1283	1.36307	1.27186
74065	4933406D12Rik	NA	NA	NA	NA	NA	NA	NA	NA	NA	NA	NA	NA	NA	NA	NA	NA	0	0	0	0	0	0	0	0	0	0
68308	4933406F09Rik	NA	NA	NA	NA	NA	NA	NA	NA	NA	NA	NA	NA	NA	NA	NA	NA	0	0	0	0	0	0	0	0	0	0
74059	4933406G16Rik	NA	NA	NA	NA	NA	NA	NA	NA	NA	NA	NA	NA	NA	NA	NA	NA	0	0	0	0	0	0	0	0	0	0
71045	4933406I18Rik	NA	-2.7769	0.0822661	NA	-1.05876	0.628283	NA	-0.608679	0.851512	NA	NA	NA	NA	0.706689	0.841496	NA	-1.03217	-0.525234	-1.01325	-0.775638	-1.12619	-0.982373	-1.03615	-1.10544	-1.06593	-1.13981
77800	4933406J10Rik	NA	0.349731	0.843937	NA	-0.743826	0.78687	NA	1.32687	0.707128	NA	NA	NA	NA	0.951181	0.618908	NA	-1.13068	-1.19458	-1.27493	-1.21168	-1.19319	-1.32068	-1.30949	-1.30427	-1.0831	-1.20401
71033	4933406K04Rik	NA	NA	NA	NA	NA	NA	NA	NA	NA	NA	NA	NA	NA	NA	NA	NA	0	0	0	0	0	0	0	0	0	0
240755	4933406M09Rik	ENSMUSG00000050526	0.209718	0.701648	NA	-0.425484	0.692586	NA	-0.111469	0.974824	NA	0.361193	0.870373	NA	-0.0931552	0.924989	NA	1.72477	1.62211	0.90352	1.00755	0.657874	0.588577	0.669277	0.681411	1.0705	1.08057
108809	4933407E24Rik	NA	NA	NA	NA	NA	NA	NA	NA	NA	NA	0.767352	0.828094	NA	0.706689	0.841496	NA	-2.33427	-2.33473	-2.32766	-2.32809	-2.32381	-2.32365	-2.30642	-2.31991	-2.31188	-2.32637
71125	4933407G14Rik	NA	0.177162	0.937765	NA	1.44571	0.682199	NA	NA	NA	NA	0.0460236	0.989361	NA	0.706689	0.841496	NA	-1.7934	-1.79477	-1.77367	-1.86258	-1.80599	-1.84932	-1.8417	-1.79433	-1.81417	-1.85745
74072	4933407I05Rik	NA	NA	NA	NA	NA	NA	NA	NA	NA	NA	NA	NA	NA	0.706689	0.841496	NA	-2.40024	-2.40046	-2.39703	-2.39724	-2.39516	-2.39509	-2.39385	-2.39327	-2.38937	-2.39641
71121	4933407I18Rik	NA	NA	NA	NA	NA	NA	NA	NA	NA	NA	0.064115	0.985374	NA	0.706689	0.841496	NA	-2.2692	-2.26987	-2.25952	-2.26015	-2.25389	-2.25365	-2.22843	-2.22669	-2.23642	-2.25764
74396	4933407K13Rik	NA	0.268833	0.37247	0.639823	1.01996	0.0361757	0.11299	0.364845	0.37952	0.644072	0.322999	0.378257	0.649668	1.26816	0.00120716	0.0108935	4.54905	4.37533	4.21561	3.63925	4.26314	3.99148	4.44563	4.33562	4.65672	3.89873
71141	4933407L21Rik	NA	-0.857398	0.6477	NA	-0.65037	0.811539	NA	-0.750602	0.818457	NA	0.0460237	0.989319	NA	1.06546	0.646031	NA	-1.19968	-1.08805	-1.23153	-1.16825	-1.28154	-1.14869	-1.13343	-1.19572	-1.05476	-1.2261
271508	4933408B17Rik	ENSMUSG00000049357	0.919985	0.0137215	0.116029	1.82941	0.000626651	NA	0.859132	0.294075	NA	1.17355	0.0780737	NA	0.454986	0.439855	NA	3.65403	3.11147	3.50853	2.58241	2.96783	2.42689	2.98959	2.6353	3.02852	2.81901
74454	4933408J17Rik	NA	-2.18517	0.264949	NA	-0.715974	0.647305	NA	0.045078	0.983255	NA	-0.061056	0.969656	NA	1.13471	0.574082	NA	-0.454022	-0.177548	-0.18854	-0.130658	-0.476508	-0.2579	0.117269	-0.148952	-0.203049	-0.345879
71122	4933408N05Rik	NA	NA	NA	NA	NA	NA	NA	NA	NA	NA	NA	NA	NA	NA	NA	NA	0	0	0	0	0	0	0	0	0	0
71084	4933409D19Rik	NA	-0.708495	0.841097	NA	NA	NA	NA	NA	NA	NA	0.767352	0.828094	NA	NA	NA	NA	-2.33381	-2.32021	-2.32749	-2.3279	-2.3238	-2.32365	-2.30717	-2.32007	-2.32643	-2.32626
227998	4933409G03Rik	ENSMUSG00000053896	-0.708495	0.841097	NA	NA	NA	NA	NA	NA	NA	NA	NA	NA	NA	NA	NA	-2.39915	-2.39394	-2.39673	-2.39689	-2.39532	-2.39526	-2.39432	-2.39389	-2.39632	-2.39626
108816	4933409K07Rik	NA	NA	NA	NA	NA	NA	NA	NA	NA	NA	NA	NA	NA	NA	NA	NA	0	0	0	0	0	0	0	0	0	0
71067	4933411E08Rik	NA	NA	NA	NA	NA	NA	NA	NA	NA	NA	1.32822	0.700194	NA	NA	NA	NA	-2.33534	-2.33584	-2.32806	-2.32854	-2.30767	-2.32365	-2.30469	-2.31953	-2.32684	-2.32665
71090	4933411G06Rik	NA	NA	NA	NA	NA	NA	NA	NA	NA	NA	NA	NA	NA	NA	NA	NA	0	0	0	0	0	0	0	0	0	0
66765	4933411K16Rik	ENSMUSG00000090369	1.00235	0.397971	NA	NA	NA	NA	-0.0978839	0.977902	NA	1.78923	0.394335	NA	2.38552	0.107035	NA	-0.201313	-0.469427	-0.737442	-0.738839	-0.505779	-0.648425	-0.548952	-0.627959	-0.119813	-0.584599
71086	4933412E12Rik	NA	-0.124941	0.355098	0.62598	-0.345973	0.0279337	0.0965176	-0.367892	0.0287077	0.173085	-0.438707	1.71708e-07	7.04518e-06	-0.424857	8.48833e-05	0.00135682	7.65985	7.7212	7.5536	7.72333	9.03307	8.94902	9.63263	10.2987	9.21611	9.50729
71088	4933412E24Rik	ENSMUSG00000071749	NA	NA	NA	NA	NA	NA	NA	NA	NA	NA	NA	NA	NA	NA	NA	0	0	0	0	0	0	0	0	0	0
71071	4933412O06Rik	NA	NA	NA	NA	NA	NA	NA	-0.819222	0.816674	NA	0.714125	0.541884	NA	0.0631829	0.938226	NA	-0.295417	-0.297894	-0.259866	-0.262202	0.139261	-0.155773	0.216368	0.386877	0.666445	0.685751
71106	4933413J09Rik	NA	0.293548	0.712809	NA	0.238199	0.724063	NA	0.151201	0.818421	NA	-0.537608	0.415527	NA	0.208905	0.753056	NA	2.1423	2.03157	2.50339	2.39862	2.55485	2.51933	2.48824	2.8026	2.48146	2.37654
71100	4933413L06Rik	NA	NA	NA	NA	NA	NA	NA	NA	NA	NA	NA	NA	NA	NA	NA	NA	0	0	0	0	0	0	0	0	0	0
74408	4933414I15Rik	NA	NA	NA	NA	NA	NA	NA	NA	NA	NA	NA	NA	NA	NA	NA	NA	0	0	0	0	0	0	0	0	0	0
66755	4933415F23Rik	ENSMUSG00000073730	NA	NA	NA	NA	NA	NA	NA	NA	NA	NA	NA	NA	NA	NA	NA	0	0	0	0	0	0	0	0	0	0
619332	4933416C03Rik	ENSMUSG00000074734	NA	NA	NA	-0.727633	0.836864	NA	NA	NA	NA	NA	NA	NA	NA	NA	NA	-2.40002	-2.40023	-2.39697	-2.3904	-2.39519	-2.39512	-2.39394	-2.39339	-2.39646	-2.39638
71081	4933416E03Rik	NA	NA	NA	NA	NA	NA	NA	NA	NA	NA	NA	NA	NA	NA	NA	NA	0	0	0	0	0	0	0	0	0	0
71180	4933416E14Rik	NA	NA	NA	NA	NA	NA	NA	NA	NA	NA	NA	NA	NA	NA	NA	NA	0	0	0	0	0	0	0	0	0	0
71159	4933416I08Rik	ENSMUSG00000079593 /// ENSMUSG00000116189	NA	NA	NA	NA	NA	NA	NA	NA	NA	NA	NA	NA	NA	NA	NA	0	0	0	0	0	0	0	0	0	0
71174	4933416M06Rik	NA	NA	NA	NA	NA	NA	NA	NA	NA	NA	NA	NA	NA	NA	NA	NA	0	0	0	0	0	0	0	0	0	0
71082	4933416M07Rik	NA	0.208737	0.796867	NA	-0.0651436	0.776061	0.853983	-0.379404	0.295241	0.570018	0.332738	0.146426	0.379823	0.115671	0.802859	0.898184	3.52079	3.45095	6.1408	6.17645	5.66907	5.74364	5.69321	5.55959	4.34971	4.28017
67550	4933416O17Rik	NA	NA	NA	NA	NA	NA	NA	NA	NA	NA	NA	NA	NA	NA	NA	NA	0	0	0	0	0	0	0	0	0	0
66761	4933417A18Rik	ENSMUSG00000021415	NA	NA	NA	NA	NA	NA	NA	NA	NA	NA	NA	NA	NA	NA	NA	0	0	0	0	0	0	0	0	0	0
71186	4933417D19Rik	NA	0.180968	0.67917	0.848829	0.471248	0.436808	NA	-0.0745994	0.923647	NA	-0.224795	0.614524	0.817018	0.661527	0.0729623	0.206793	3.46178	3.35122	3.20754	2.94853	3.12828	2.88001	3.52006	3.96106	4.12219	3.70837
71134	4933417E11Rik	NA	0.634129	0.396705	NA	1.85446	0.0285414	NA	1.98607	0.190846	NA	0.767352	0.828094	NA	1.27713	0.716193	NA	1.38421	1.07603	1.70079	0.814395	0.848911	0.552607	0.595487	0.3934	0.492577	0.349714
71182	4933417G07Rik	NA	0.298407	0.882196	NA	-2.35307	0.440321	NA	0.0774927	0.971177	NA	-0.675316	0.848446	NA	0.706689	0.841496	NA	-1.27592	-1.27994	-1.41775	-1.18612	-1.28279	-1.27531	-1.32706	-1.32198	-1.35035	-1.41226
71153	4933417O13Rik	NA	-0.708495	0.841097	NA	NA	NA	NA	NA	NA	NA	NA	NA	NA	NA	NA	NA	-2.39915	-2.39394	-2.39673	-2.39689	-2.39532	-2.39526	-2.39432	-2.39389	-2.39632	-2.39626
71162	4933421I07Rik	ENSMUSG00000030463	NA	NA	NA	0.709786	0.796685	NA	-0.0978839	0.977902	NA	-0.675316	0.848446	NA	0.706689	0.841496	NA	-2.01001	-2.01122	-1.91573	-1.95534	-1.94411	-1.9437	-1.97548	-1.93388	-1.9513	-1.98931
100504166	4933421O10Rik	NA	0.0390661	0.848083	0.932834	0.025372	0.901787	0.940293	-0.221053	0.377521	0.642292	0.195766	0.458908	0.713858	0.0941424	0.66761	0.816092	5.88639	5.85972	5.77343	5.73871	5.63184	5.67652	5.76982	5.76174	5.9314	5.8657
71133	4933422A05Rik	NA	0.765535	0.633981	NA	-0.557641	0.7916	NA	-0.0806342	0.956338	NA	0.756088	0.552743	NA	0.615186	0.694051	NA	0.109407	0.00363043	-0.0102972	0.0456026	0.255913	0.252612	0.481745	0.307156	0.288459	0.0696719
74456	4933424G05Rik	NA	0.0154622	0.994772	NA	-0.996336	0.688668	NA	1.75673	0.312436	NA	3.0064	0.149581	NA	0.184103	0.900571	NA	-0.575406	-0.579079	-0.610353	-0.479886	-0.309997	-0.513612	-0.147478	-0.656734	-0.303993	-0.34635
71166	4933424G06Rik	NA	0.337673	0.689915	NA	-0.121378	0.880096	NA	0.694476	0.508767	NA	0.569215	0.789533	NA	-0.528198	0.807876	NA	1.06592	0.95877	1.1649	1.19612	1.04209	0.879761	0.710735	0.605809	0.548713	0.603439
66763	4933425L06Rik	ENSMUSG00000021718	-1.97818	0.475009	NA	0.70993	0.798484	NA	NA	NA	NA	NA	NA	NA	0.706689	0.841496	NA	-2.00423	-1.90406	-1.92155	-1.95629	-1.98018	-1.97982	-1.97394	-1.9712	-1.95274	-1.98607
71154	4933426K07Rik	NA	-0.708495	0.841097	NA	-0.445498	0.895228	NA	1.32687	0.707128	NA	-0.675316	0.848446	NA	NA	NA	NA	-2.00877	-1.97248	-1.95444	-1.91809	-1.90716	-1.98167	-1.97515	-1.93465	-1.98907	-1.98861
232217	4933427D06Rik	NA	0.6325	0.847844	NA	-1.55044	0.312867	NA	-1.43038	0.579618	NA	-0.675316	0.848446	NA	0.00355073	0.999198	NA	-1.2584	-1.30512	-1.20879	-0.968407	-1.25688	-1.12523	-1.31017	-1.23883	-1.2687	-1.26845
74477	4933427D14Rik	ENSMUSG00000020807	0.0928364	0.440654	0.694408	0.307689	0.0570223	0.149273	0.21136	0.127563	0.369644	-0.242656	0.0741933	0.241697	-0.00187106	0.986967	0.993355	8.2043	8.1349	7.7345	7.51918	7.90206	7.70811	7.95319	8.18261	8.10407	8.10091
66769	4933427E11Rik	ENSMUSG00000094918	0.896274	0.412753	NA	0.980753	0.545008	NA	2.87632	0.138606	NA	1.50673	0.427419	NA	0.714776	0.530098	NA	0.562785	0.290517	0.323575	0.148875	0.455475	-0.0180138	0.282226	0.142258	0.570702	0.347531
71234	4933427E13Rik	NA	NA	NA	NA	NA	NA	NA	NA	NA	NA	NA	NA	NA	NA	NA	NA	0	0	0	0	0	0	0	0	0	0
330053	4933427G23Rik	NA	-0.576144	0.719092	NA	1.3114	0.416744	NA	1.85439	0.577792	NA	1.37163	0.579508	NA	-1.43746	0.683921	NA	-0.824727	-0.728845	-0.625076	-0.804697	-0.767868	-0.98548	-0.761081	-0.889837	-0.998433	-0.853006
71235	4933427I22Rik	ENSMUSG00000085928	NA	NA	NA	NA	NA	NA	NA	NA	NA	NA	NA	NA	NA	NA	NA	0	0	0	0	0	0	0	0	0	0
71293	4933428C19Rik	NA	NA	NA	NA	NA	NA	NA	NA	NA	NA	NA	NA	NA	NA	NA	NA	0	0	0	0	0	0	0	0	0	0
100141474	4933428G20Rik	ENSMUSG00000047988	-0.0925094	0.816914	0.920133	-0.879885	0.332964	NA	-0.368256	0.224103	0.49344	-0.261819	0.578709	0.795192	0.268977	0.625531	0.788334	3.91389	3.97186	3.03723	3.27502	4.68602	5.23287	4.20279	4.05272	3.65612	3.53122
71248	4933428M09Rik	ENSMUSG00000042525	NA	NA	NA	NA	NA	NA	NA	NA	NA	NA	NA	NA	NA	NA	NA	0	0	0	0	0	0	0	0	0	0
71232	4933429K18Rik	NA	NA	NA	NA	NA	NA	NA	NA	NA	NA	NA	NA	NA	NA	NA	NA	0	0	0	0	0	0	0	0	0	0
66770	4933429O19Rik	NA	NA	NA	NA	NA	NA	NA	NA	NA	NA	NA	NA	NA	NA	NA	NA	0	0	0	0	0	0	0	0	0	0
71285	4933430H16Rik	NA	NA	NA	NA	NA	NA	NA	NA	NA	NA	NA	NA	NA	NA	NA	NA	0	0	0	0	0	0	0	0	0	0
214106	4933430I17Rik	ENSMUSG00000058046	0.0561674	0.904746	0.958555	-0.357211	0.198926	0.337294	-0.156839	0.526762	0.752399	-0.610159	0.0197332	0.096955	-0.720313	1.58573e-05	0.000342266	4.43137	4.41289	5.2925	5.47627	5.57104	5.6389	5.62751	6.04605	6.45716	6.97376
71316	4933430M04Rik	NA	NA	NA	NA	NA	NA	NA	NA	NA	NA	NA	NA	NA	NA	NA	NA	0	0	0	0	0	0	0	0	0	0
71249	4933430N04Rik	NA	NA	NA	NA	NA	NA	NA	NA	NA	NA	NA	NA	NA	NA	NA	NA	0	0	0	0	0	0	0	0	0	0
329735	4933431E20Rik	NA	-0.0156705	0.974695	0.989496	-0.858717	0.175501	NA	0.553657	0.763666	NA	-0.526357	0.744574	NA	-0.377102	0.615418	NA	2.62476	2.67346	2.24451	2.77392	1.6732	1.52767	1.46068	1.64602	2.05958	2.19375
71265	4933431G14Rik	NA	-0.0420716	0.941164	NA	1.56281	0.0157662	NA	0.0070928	0.992703	NA	-0.242081	0.718344	NA	0.787633	0.215901	NA	2.52161	2.53498	2.88483	2.19934	2.48738	2.34554	2.5316	2.76014	2.82158	2.45326
71196	4933432G23Rik	NA	NA	NA	NA	NA	NA	NA	NA	NA	NA	NA	NA	NA	NA	NA	NA	0	0	0	0	0	0	0	0	0	0
71264	4933432I03Rik	NA	-0.508357	0.569323	NA	-0.452588	0.262049	0.408101	-0.262824	0.371632	0.636986	-0.00437212	0.983975	0.995551	-0.238374	0.370055	0.582557	3.15276	3.25948	4.16074	4.37893	5.21227	5.2011	5.44619	5.66754	5.058	5.1945
66779	4933432I09Rik	ENSMUSG00000086008	-0.00133848	0.999565	NA	0.215152	0.874068	NA	2.43362	0.159132	NA	0.055517	0.987188	NA	1.25103	0.721863	NA	-0.834677	-0.850679	-0.566356	-0.617202	-0.565114	-0.86027	-0.736202	-0.836854	-0.813639	-0.947217
75793	4933432K03Rik	NA	0.734173	0.835418	NA	0.715035	0.83965	NA	NA	NA	NA	NA	NA	NA	NA	NA	NA	-2.32036	-2.33266	-2.31498	-2.32727	-2.32379	-2.32366	-2.32158	-2.32061	-2.32601	-2.32587
71314	4933433F19Rik	NA	NA	NA	NA	NA	NA	NA	NA	NA	NA	NA	NA	NA	NA	NA	NA	0	0	0	0	0	0	0	0	0	0
66785	4933433G08Rik	NA	NA	NA	NA	NA	NA	NA	NA	NA	NA	NA	NA	NA	NA	NA	NA	0	0	0	0	0	0	0	0	0	0
71274	4933433G15Rik	NA	1.9822	0.0590531	NA	0.734165	0.166068	NA	0.414341	0.7098	NA	2.20189	0.148682	NA	1.14052	0.367795	NA	1.6213	1.06639	2.49435	2.07461	1.47632	1.30589	1.47257	1.07247	1.43995	1.17383
71226	4933433G19Rik	NA	-0.0474319	0.932339	NA	0.832882	0.216874	NA	-0.222003	0.755756	NA	1.10312	0.184042	NA	0.143427	0.852606	NA	2.45035	2.45905	2.59979	2.18531	2.25868	2.37969	2.52169	2.06119	2.24659	2.17664
74473	4933433H22Rik	NA	1.15369	0.307405	NA	0.367534	0.728976	NA	-0.792806	0.0517182	0.233749	-1.17958	0.0170539	0.0873508	-0.220429	0.691967	0.831919	2.19231	1.92864	2.24013	2.16684	3.50476	4.07345	3.08367	3.70836	2.88175	3.01668
99650	4933434E20Rik	ENSMUSG00000027942	-0.149323	0.160989	0.421297	-0.271118	0.0614648	0.156139	-0.231794	0.045276	0.217628	0.0884517	0.289131	0.563666	-0.299803	0.000447672	0.00507663	9.81319	9.89923	9.77936	9.92984	9.83261	9.87224	10.0665	10.1223	10.1252	10.321
71203	4933434M16Rik	NA	NA	NA	NA	NA	NA	NA	0.623446	0.859961	NA	NA	NA	NA	NA	NA	NA	-2.40099	-2.40125	-2.39724	-2.39748	-2.38673	-2.39496	-2.39351	-2.39284	-2.39661	-2.39651
71209	4933436E23Rik	NA	NA	NA	NA	-0.727633	0.836864	NA	NA	NA	NA	NA	NA	NA	NA	NA	NA	-2.40033	-2.40056	-2.39706	-2.39	-2.39515	-2.39507	-2.3938	-2.39321	-2.39651	-2.39642
71244	4933436H12Rik	NA	NA	NA	NA	NA	NA	NA	NA	NA	NA	NA	NA	NA	NA	NA	NA	0	0	0	0	0	0	0	0	0	0
66780	4933436I01Rik	ENSMUSG00000025288	NA	NA	NA	NA	NA	NA	NA	NA	NA	NA	NA	NA	NA	NA	NA	0	0	0	0	0	0	0	0	0	0
71247	4933438B17Rik	NA	NA	NA	NA	NA	NA	NA	NA	NA	NA	NA	NA	NA	NA	NA	NA	0	0	0	0	0	0	0	0	0	0
71270	4933438K21Rik	NA	NA	NA	NA	0.715035	0.83965	NA	-0.819222	0.816674	NA	NA	NA	NA	-0.735979	0.83502	NA	-2.26835	-2.26899	-2.23868	-2.25974	-2.25377	-2.2331	-2.24999	-2.24833	-2.25759	-2.23689
74476	4933439C10Rik	NA	-0.449295	0.00460542	0.0607995	-0.405799	0.00864955	0.0504836	-0.414046	0.0826677	0.30024	-0.369586	0.173009	0.421569	-0.357147	0.158618	0.345376	7.9229	8.22507	7.50922	7.77564	6.64844	7.15188	6.35993	6.31491	6.15905	6.35346
327780	4933439G19Rik	NA	-1.2916	0.712917	NA	1.2572	0.720527	NA	-0.0978839	0.977902	NA	0.0125555	0.997067	NA	-1.24106	0.627224	NA	-1.6998	-1.59498	-1.56588	-1.6768	-1.6062	-1.60561	-1.5961	-1.59166	-1.61641	-1.50645
71319	4933439K11Rik	ENSMUSG00000085184	0.113288	0.769545	0.89454	0.434892	0.408167	NA	0.7328	0.372622	NA	0.226981	0.593437	0.803931	0.404774	0.172976	0.365448	3.70383	3.63451	3.4326	3.21188	3.19636	2.80204	3.94351	3.96434	4.61445	4.33346
71321	4933440J02Rik	NA	NA	NA	NA	NA	NA	NA	NA	NA	NA	2.00593	0.499163	NA	NA	NA	NA	-2.27059	-2.27132	-2.26015	-2.26084	-2.25407	-2.25382	-2.18024	-2.2479	-2.2584	-2.25812
71208	4933440M02Rik	NA	NA	NA	NA	NA	NA	NA	NA	NA	NA	NA	NA	NA	NA	NA	NA	0	0	0	0	0	0	0	0	0	0
381622	5031410I06Rik	ENSMUSG00000051940	NA	NA	NA	NA	NA	NA	NA	NA	NA	NA	NA	NA	NA	NA	NA	0	0	0	0	0	0	0	0	0	0
269630	5031425E22Rik	NA	-0.163672	0.161669	0.422149	-0.0620028	0.572021	0.696841	0.0654157	0.674484	0.838889	0.0939802	0.44169	0.70062	0.0225275	0.872026	0.937646	8.42761	8.53393	8.48403	8.50807	8.33201	8.36668	8.33357	8.20818	8.0918	8.07228
319684	5031425F14Rik	NA	-3.69751	1.67948e-21	3.04777e-18	-3.80322	4.03569e-10	1.42471e-07	-3.86822	0.00821689	NA	NA	NA	NA	-1.54915	0.339288	NA	2.24973	4.72026	1.88873	4.11923	1.3591	2.13419	1.32832	1.34342	1.39338	1.64034
68144	5031426D15Rik	NA	-0.622392	0.824219	NA	-0.727633	0.836864	NA	-0.819222	0.816674	NA	NA	NA	NA	NA	NA	NA	-2.10785	-2.08214	-2.12244	-2.09668	-2.11548	-2.08865	-2.11057	-2.10842	-2.12043	-2.12011
100503613	5031434C07Rik	NA	NA	NA	NA	NA	NA	NA	NA	NA	NA	NA	NA	NA	NA	NA	NA	0	0	0	0	0	0	0	0	0	0
100039684	5031434O11Rik	NA	-0.135686	0.722448	0.870484	-0.656458	0.189264	NA	-0.854058	0.30063	NA	-0.937663	0.421456	NA	0.326905	0.657973	NA	3.28633	3.35307	2.63904	2.9666	2.10468	2.44662	1.99815	2.19748	2.41533	2.28974
223739	5031439G07Rik	ENSMUSG00000036046	0.067548	0.51066	0.743827	0.0905872	0.396534	0.543311	-0.00837179	0.923182	0.966323	-0.0521228	0.579891	0.796103	-0.00736301	0.943889	0.972501	13.1804	13.1236	13.1656	13.0838	12.691	12.7395	12.7294	12.7241	13.1102	13.1101
75954	5033403H07Rik	NA	NA	NA	NA	NA	NA	NA	NA	NA	NA	NA	NA	NA	NA	NA	NA	0	0	0	0	0	0	0	0	0	0
114668	5033404E19Rik	NA	NA	NA	NA	NA	NA	NA	NA	NA	NA	0.767352	0.828094	NA	NA	NA	NA	-2.40128	-2.40155	-2.39732	-2.39758	-2.38622	-2.39492	-2.39339	-2.39267	-2.39665	-2.39655
77675	5033406O09Rik	NA	-0.32367	0.049996	0.230441	-0.488685	0.119281	0.240465	-0.95965	0.0425509	0.21068	0.0210862	0.955306	0.984032	0.0207431	0.90075	0.951023	6.122	6.34831	5.22728	5.47931	4.56089	4.72751	4.77563	5.01581	6.53847	6.52264
76000	5033430I15Rik	NA	-0.201124	0.558193	0.772158	-0.706381	0.056633	0.148695	-0.954885	0.138674	NA	-0.229154	0.824527	NA	-0.193177	0.801919	NA	3.54671	3.67952	3.33107	3.72589	2.61989	3.09421	2.44594	2.45987	2.54718	2.61841
76676	5330411J11Rik	NA	NA	NA	NA	-0.0497693	0.988747	NA	NA	NA	NA	-0.675316	0.848446	NA	-1.28709	0.71416	NA	-2.13827	-2.13922	-2.09427	-2.09517	-2.11665	-2.11632	-2.11104	-2.07824	-2.12231	-2.06128
414081	5330413P13Rik	NA	NA	NA	NA	NA	NA	NA	NA	NA	NA	NA	NA	NA	NA	NA	NA	0	0	0	0	0	0	0	0	0	0
403201	5330416C01Rik	NA	0.734173	0.835418	NA	NA	NA	NA	0.623446	0.859961	NA	NA	NA	NA	NA	NA	NA	-2.32036	-2.33266	-2.32692	-2.32727	-2.31185	-2.32366	-2.32158	-2.32061	-2.32601	-2.32587
229722	5330417C22Rik	ENSMUSG00000040412	1.44737	0.682028	NA	-0.650146	0.812936	NA	NA	NA	NA	2.05734	0.341343	NA	0.706689	0.841496	NA	-1.58809	-1.70166	-1.61835	-1.56378	-1.65983	-1.65922	-1.3683	-1.58864	-1.6141	-1.66965
76679	5330417H12Rik	NA	2.22873	0.254998	NA	1.9844	0.4598	NA	0.623446	0.859961	NA	0.685447	0.81799	NA	-0.600145	0.793442	NA	-0.978299	-1.25274	-1.08106	-1.2888	-1.19949	-1.26788	-1.11757	-1.18109	-1.15519	-1.03887
78271	5330427O13Rik	NA	-0.119676	0.883914	NA	-0.289857	0.757463	NA	-1.56264	0.197008	NA	-1.92084	0.475038	NA	NA	NA	NA	0.861695	0.875968	0.804125	0.914797	0.396797	0.88248	0.277598	0.445223	0.175631	0.17666
383820	5330432E05Rik	NA	NA	NA	NA	NA	NA	NA	NA	NA	NA	NA	NA	NA	NA	NA	NA	0	0	0	0	0	0	0	0	0	0
100043213	5330434G04Rik	NA	NA	NA	NA	NA	NA	NA	NA	NA	NA	NA	NA	NA	NA	NA	NA	0	0	0	0	0	0	0	0	0	0
321015	5330439B14Rik	NA	NA	NA	NA	NA	NA	NA	NA	NA	NA	NA	NA	NA	NA	NA	NA	0	0	0	0	0	0	0	0	0	0
71339	5430400D12Rik	NA	-0.41253	0.378534	0.645503	0.0516762	0.951903	NA	-1.6549	0.170059	NA	0.382753	0.671759	NA	0.370792	0.578605	NA	2.64034	2.87175	2.01054	1.97893	1.85043	2.00797	2.0881	2.10015	2.46766	2.3051
71392	5430401F13Rik	ENSMUSG00000094113	NA	NA	NA	NA	NA	NA	NA	NA	NA	NA	NA	NA	NA	NA	NA	0	0	0	0	0	0	0	0	0	0
100504461	5430401H09Rik	NA	0.360267	0.78603	NA	0.880219	0.494664	NA	NA	NA	NA	0.767352	0.828094	NA	0.706689	0.841496	NA	-0.778923	-0.850839	-0.674969	-0.855125	-1.09902	-1.09823	-1.01241	-1.07958	-1.04106	-1.11179
71351	5430402E10Rik	ENSMUSG00000044121	NA	NA	NA	NA	NA	NA	NA	NA	NA	NA	NA	NA	NA	NA	NA	0	0	0	0	0	0	0	0	0	0
73183	5430402O13Rik	NA	0.0596181	0.884653	0.948366	-1.02467	0.0789798	0.181964	0.0791564	0.889671	NA	-1.16245	0.168712	NA	0.330103	0.624156	NA	3.31538	3.25836	2.91828	3.39051	2.81128	2.94558	2.6119	2.86791	2.8148	2.66332
330737	5430403N17Rik	NA	NA	NA	NA	NA	NA	NA	NA	NA	NA	NA	NA	NA	NA	NA	NA	0	0	0	0	0	0	0	0	0	0
74487	5430405H02Rik	NA	-0.154087	0.573952	0.784065	-0.384547	0.451008	0.593846	-0.0727076	0.838481	0.930076	-0.269516	0.226866	0.49143	-0.0806275	0.716462	0.846051	4.91225	4.99213	4.30643	4.41567	5.39503	5.29507	5.59884	5.87823	5.64499	5.69978
71395	5430419D17Rik	ENSMUSG00000006204	NA	NA	NA	NA	NA	NA	NA	NA	NA	NA	NA	NA	NA	NA	NA	0	0	0	0	0	0	0	0	0	0
74489	5430421F17Rik	NA	NA	NA	NA	NA	NA	NA	NA	NA	NA	NA	NA	NA	NA	NA	NA	0	0	0	0	0	0	0	0	0	0
71349	5430427M07Rik	NA	1.727	0.284287	NA	-0.0327752	0.9844	NA	NA	NA	NA	0.595843	0.823094	NA	-0.0182634	0.995874	NA	-0.8461	-1.10542	-0.942543	-0.963576	-1.18743	-1.18666	-1.03177	-1.09724	-1.13156	-1.12974
71398	5430427O19Rik	ENSMUSG00000025058	-0.153463	0.083029	0.301289	-0.294178	0.00330034	0.030162	-0.436544	0.000263476	0.00856123	-0.702252	6.57885e-14	1.39494e-11	-0.633785	3.02132e-07	1.22557e-05	9.71885	9.80604	10.7471	10.9309	10.5411	10.9462	10.2711	10.6477	9.55516	9.93501
71422	5430428K19Rik	NA	NA	NA	NA	NA	NA	NA	NA	NA	NA	NA	NA	NA	NA	NA	NA	0	0	0	0	0	0	0	0	0	0
71342	5430434I15Rik	NA	NA	NA	NA	NA	NA	NA	NA	NA	NA	NA	NA	NA	NA	NA	NA	0	0	0	0	0	0	0	0	0	0
71432	5430437J10Rik	NA	-0.09817	0.539335	0.760578	-0.0449994	0.817755	0.881922	0.185654	0.402745	0.663527	0.0233616	0.937066	0.976371	0.124552	0.721789	0.849907	6.25175	6.31179	6.38031	6.39986	6.21239	6.25336	5.81509	5.64833	5.29188	5.21919
71362	5430440P10Rik	NA	0.747358	0.788214	NA	NA	NA	NA	1.18289	0.736188	NA	NA	NA	NA	-0.735979	0.83502	NA	-2.0081	-2.03985	-2.0558	-2.05671	-2.01695	-2.0474	-2.01126	-2.03954	-2.05348	-2.02232
232426	5530400C23Rik	ENSMUSG00000055594	NA	NA	NA	NA	NA	NA	NA	NA	NA	NA	NA	NA	NA	NA	NA	0	0	0	0	0	0	0	0	0	0
71388	5530401A14Rik	NA	NA	NA	NA	NA	NA	NA	NA	NA	NA	NA	NA	NA	NA	NA	NA	0	0	0	0	0	0	0	0	0	0
71445	5530601H04Rik	NA	0.0736485	0.589466	0.795664	0.130168	0.406357	0.553149	0.158503	0.452278	0.70128	0.207558	0.323921	0.599212	0.285888	0.114472	0.281058	6.9301	6.87818	6.72511	6.62364	6.464	6.31116	6.38724	6.32676	6.61833	6.43165
70487	5730403I07Rik	NA	NA	NA	NA	0.715035	0.83965	NA	NA	NA	NA	NA	NA	NA	NA	NA	NA	-2.40007	-2.40028	-2.39014	-2.39718	-2.39519	-2.39511	-2.39392	-2.39337	-2.39647	-2.39638
70489	5730405O15Rik	NA	0.0446063	0.907359	0.95941	0.172863	0.80453	NA	0.374526	0.626858	NA	1.15541	0.0861524	NA	0.602556	0.132082	0.306819	3.69105	3.66797	2.94337	2.87656	3.10199	2.7038	3.12137	2.81607	3.78982	3.43258
67531	5730408K05Rik	NA	-0.0418501	0.876027	0.945327	-0.628659	0.0992689	0.212356	-0.0836407	0.861307	0.939573	-0.0151232	0.97358	0.990822	0.134806	0.725577	0.852528	4.60578	4.63433	3.89513	4.22099	3.88994	4.07909	4.19361	4.06225	4.27132	4.19364
230757	5730409E04Rik	ENSMUSG00000073755	-0.270466	0.00222683	0.0376664	-0.411297	0.000313196	0.00797907	-0.0682309	0.626061	0.811807	-0.164739	0.259408	0.531965	-0.2523	0.0430781	0.143694	9.01356	9.19565	8.41544	8.66782	8.1524	8.26936	8.14416	8.17891	8.61601	8.78462
70494	5730409K12Rik	NA	-0.214089	0.572327	0.782675	-1.30855	0.0676888	NA	-0.0991592	0.963196	NA	0.767352	0.828094	NA	1.10518	0.672384	NA	2.57609	2.7095	1.57148	2.13857	1.04736	1.1521	0.953734	0.88787	1.04791	0.894951
70491	5730412P04Rik	NA	NA	NA	NA	NA	NA	NA	NA	NA	NA	NA	NA	NA	NA	NA	NA	0	0	0	0	0	0	0	0	0	0
70550	5730416F02Rik	NA	6.63259	1.12897e-08	2.20636e-06	6.39258	1.03675e-05	0.00068139	5.89852	1.08135e-06	0.000116061	5.92265	6.11754e-08	2.90477e-06	5.88663	8.35723e-06	0.000200379	6.45997	3.3195	6.42189	3.4567	6.35146	3.54945	6.46071	3.61466	6.37665	3.55126
70523	5730420D15Rik	NA	NA	NA	NA	-0.727633	0.836864	NA	NA	NA	NA	NA	NA	NA	-0.735979	0.83502	NA	-2.334	-2.33445	-2.32756	-2.31368	-2.32381	-2.32365	-2.32116	-2.32	-2.32648	-2.312
433966	5730422E09Rik	NA	0.828526	0.409249	NA	-0.285901	0.777384	NA	-1.10768	0.469716	NA	-1.43349	0.430676	NA	0.642417	0.629165	NA	0.796036	0.583721	0.727794	0.763099	0.297885	0.627011	0.51907	0.586848	0.681029	0.530045
70538	5730435O14Rik	NA	0.734173	0.835418	NA	NA	NA	NA	NA	NA	NA	0.767352	0.828094	NA	0.631729	0.818098	NA	-2.10791	-2.13821	-2.12406	-2.12492	-2.11635	-2.11603	-2.08155	-2.10854	-2.06309	-2.09211
70591	5730455P16Rik	ENSMUSG00000057181	0.85244	2.69496e-18	3.42341e-15	1.24694	9.85487e-26	1.73953e-22	1.01461	5.36519e-16	5.52151e-13	1.03018	4.12802e-25	3.9051e-22	1.1056	3.45148e-28	6.10024e-25	9.42567	8.84798	9.25554	8.43667	9.33625	8.65861	9.349	8.69349	9.41126	8.6759
70594	5730460C07Rik	NA	NA	NA	NA	NA	NA	NA	NA	NA	NA	NA	NA	NA	NA	NA	NA	0	0	0	0	0	0	0	0	0	0
70592	5730480H06Rik	NA	0.030859	0.887762	0.950112	0.129358	0.611538	0.730135	0.0400825	0.896275	0.955311	-0.0622258	0.831018	0.930794	0.27261	0.267848	0.477357	5.65629	5.62036	5.32542	5.23479	5.26455	5.16884	5.3266	5.41729	5.57806	5.40044
236366	5730507C01Rik	ENSMUSG00000073197	-0.503249	0.634494	NA	-1.56605	0.444127	NA	-0.29911	0.893523	NA	-1.46865	0.488007	NA	-1.34136	0.430998	NA	-0.0439771	0.0758252	-0.35622	-0.157996	-0.216796	-0.136856	-0.321415	-0.0918708	-0.278054	-0.036925
70626	5730522E02Rik	NA	-1.41849	0.688004	NA	0.63332	0.819022	NA	1.50726	0.651232	NA	-0.675316	0.848446	NA	0.706689	0.841496	NA	-1.81649	-1.72607	-1.70395	-1.75123	-1.6919	-1.78326	-1.72934	-1.72561	-1.74641	-1.79178
77580	5730596B20Rik	NA	-0.708495	0.841097	NA	NA	NA	NA	NA	NA	NA	0.767352	0.828094	NA	-0.511444	0.872573	NA	-2.13698	-2.10882	-2.12388	-2.12474	-2.11626	-2.11595	-2.08181	-2.10852	-2.09262	-2.06319
244234	5830411N06Rik	ENSMUSG00000054672	-0.708495	0.841097	NA	0.515794	0.849965	NA	NA	NA	NA	NA	NA	NA	0.706689	0.841496	NA	-2.13537	-2.10873	-2.06799	-2.0963	-2.11577	-2.11548	-2.11069	-2.10846	-2.09341	-2.12058
74757	5830416I19Rik	NA	-0.557226	0.0713552	0.276856	-0.714233	0.0360946	0.112908	-0.885257	0.212639	0.481689	-0.972781	0.557125	NA	0.858635	0.527552	NA	4.35094	4.7031	3.76487	4.20677	2.85016	3.60011	2.42111	2.4103	2.35434	2.22093
100302730	5830417I10Rik	NA	0.103163	0.393085	0.657367	0.218093	0.145887	0.274658	0.243634	0.182815	0.445338	0.0646294	0.660325	0.846257	0.0852483	0.517913	0.709243	7.9293	7.85194	7.75123	7.58473	7.3423	7.13151	7.53693	7.56632	8.00048	7.94045
100529079	5830418P13Rik	NA	1.9741	0.194406	NA	2.20502	0.1901	NA	NA	NA	NA	0.767352	0.828094	NA	-0.735979	0.83502	NA	-0.921511	-1.23866	-0.963906	-1.27074	-1.31569	-1.31499	-1.23869	-1.2984	-1.32783	-1.26205
76062	5830428M24Rik	NA	1.71859	0.415745	NA	3.20153	0.13593	NA	-0.315848	0.903426	NA	-0.840128	0.678068	NA	-0.675958	0.831188	NA	-0.808056	-1.00197	-0.608158	-1.04859	-0.816723	-0.873822	-0.935446	-0.724542	-0.967954	-0.904608
67765	5830432E09Rik	NA	-0.0554577	0.716664	0.867983	0.0810276	0.616718	0.734049	0.0130557	0.960304	0.983469	0.0839853	0.565721	0.785241	-0.0257448	0.862769	0.932379	6.93187	6.95945	7.13528	7.0629	6.95836	6.68323	7.22363	7.43716	7.83008	7.8555
641454	5830444B04Rik	NA	0.560123	0.061392	0.255351	0.349591	0.447982	0.591375	0.466194	0.312352	0.587528	0.475249	0.217092	0.47949	0.723459	0.0491804	0.157388	4.95653	4.56352	4.28471	4.06816	4.64985	4.14466	4.44785	4.38768	4.52669	4.09851
622307	5830473C10Rik	ENSMUSG00000070690	1.52893	0.530987	NA	-0.00629435	0.998579	NA	-0.139243	0.962811	NA	NA	NA	NA	NA	NA	NA	-1.59319	-1.72406	-1.70118	-1.70258	-1.64123	-1.64072	-1.72744	-1.72359	-1.74509	-1.74452
320939	5930403L14Rik	NA	0.734173	0.835418	NA	NA	NA	NA	NA	NA	NA	NA	NA	NA	-0.735979	0.83502	NA	-2.32045	-2.33242	-2.32683	-2.32717	-2.32378	-2.32366	-2.32164	-2.3207	-2.32595	-2.31421
319616	5930412G12Rik	NA	NA	NA	NA	NA	NA	NA	NA	NA	NA	NA	NA	NA	NA	NA	NA	0	0	0	0	0	0	0	0	0	0
319688	5930422O12Rik	NA	-0.800473	0.270103	NA	-0.00629435	0.998579	NA	-0.640981	0.456625	NA	-0.328275	0.747692	NA	-0.231691	0.793878	NA	1.47009	1.81319	0.894257	0.88942	1.60498	1.87365	1.47646	1.58401	1.47024	1.57867
319982	5930430L01Rik	NA	-0.016985	0.973816	0.989156	0.352698	0.429398	0.573612	1.33179	0.337334	NA	-0.592284	0.777471	NA	0.217395	0.814448	NA	2.43337	2.47046	2.78659	2.55586	1.81243	1.4601	1.31832	1.47099	1.81142	1.73737
328324	5930438M14Rik	NA	NA	NA	NA	NA	NA	NA	NA	NA	NA	0.0460237	0.989317	NA	NA	NA	NA	-2.33586	-2.33639	-2.32826	-2.32876	-2.32383	-2.32365	-2.30383	-2.30246	-2.32698	-2.32678
109198	6030407O03Rik	NA	NA	NA	NA	NA	NA	NA	NA	NA	NA	NA	NA	NA	0.706689	0.841496	NA	-2.40024	-2.40046	-2.39703	-2.39724	-2.39516	-2.39509	-2.39385	-2.39327	-2.38937	-2.39641
77717	6030408B16Rik	NA	-0.437131	0.809404	NA	-1.26325	0.369249	NA	1.93277	0.40148	NA	0.535549	0.76584	NA	0.277752	0.876484	NA	-0.357541	-0.319959	-0.32163	-0.0689388	-0.186514	-0.432377	-0.191677	-0.272371	-0.242977	-0.30651
628850	6030426L16Rik	NA	NA	NA	NA	NA	NA	NA	NA	NA	NA	NA	NA	NA	NA	NA	NA	0	0	0	0	0	0	0	0	0	0
77878	6030440G07Rik	NA	NA	NA	NA	-1.29589	0.712184	NA	NA	NA	NA	0.767352	0.828094	NA	NA	NA	NA	-2.26761	-2.26823	-2.2588	-2.22027	-2.25368	-2.25346	-2.2305	-2.24847	-2.25733	-2.25709
320719	6030443J06Rik	NA	1.25426	0.264974	NA	1.28863	0.424436	NA	-1.55426	0.288324	NA	0.26136	0.815525	NA	1.50088	0.159849	NA	0.853103	0.525643	0.609678	0.418579	0.670771	0.813504	0.748169	0.835908	1.11776	0.656824
320133	6030445D17Rik	NA	0.950321	0.261635	NA	2.41504	0.334987	NA	-0.446025	0.621934	NA	0.0461357	0.960195	NA	0.995781	0.158319	NA	1.60602	1.26824	1.07897	0.83398	1.56192	1.61256	1.48838	1.56637	2.05602	1.61522
330837	6030452D12Rik	NA	-0.708495	0.841097	NA	NA	NA	NA	-0.819222	0.816674	NA	NA	NA	NA	NA	NA	NA	-2.33316	-2.32043	-2.32724	-2.32763	-2.3238	-2.31052	-2.32137	-2.3203	-2.32625	-2.32609
77877	6030458C11Rik	ENSMUSG00000022195	0.0660469	0.502195	0.738355	-0.0907933	0.474991	0.615456	0.13639	0.243893	0.516631	-0.0305867	0.778702	0.905887	0.0312452	0.78127	0.886533	9.08439	9.03056	8.69132	8.73192	8.75814	8.58695	8.85137	8.9693	9.16446	9.14298
234863	6030466F02Rik	NA	NA	NA	NA	NA	NA	NA	NA	NA	NA	NA	NA	NA	NA	NA	NA	0	0	0	0	0	0	0	0	0	0
77727	6030468B19Rik	ENSMUSG00000025573	-0.0837035	0.947687	NA	0.989984	0.695072	NA	-0.0781337	0.97667	NA	-0.801563	0.672385	NA	0.81899	0.581644	NA	-0.163433	-0.161616	-0.328446	-0.456533	-0.360212	-0.374668	-0.34512	-0.193932	-0.0835157	-0.268078
77883	6030498E09Rik	ENSMUSG00000051361	NA	NA	NA	NA	NA	NA	NA	NA	NA	NA	NA	NA	NA	NA	NA	0	0	0	0	0	0	0	0	0	0
76133	6230400D17Rik	NA	-0.074928	0.795021	0.909376	0.0252947	0.947998	0.968215	-0.116152	0.799295	0.91065	0.0047205	0.990809	0.996997	0.280409	0.416639	0.625035	4.40146	4.43805	4.24041	4.18251	4.11057	4.20622	4.33289	4.31323	4.50155	4.31798
100504301	6230426M11Rik	NA	-0.576818	0.176462	0.441499	-0.443732	0.482791	NA	0.061751	0.934668	NA	-0.412587	0.652672	NA	-0.24311	0.745444	NA	2.85126	3.15705	2.5556	2.77148	2.59873	2.49331	2.09325	2.36298	2.29956	2.38484
103712	6330403K07Rik	ENSMUSG00000018451	1.19989	0.204313	NA	0.278344	0.770617	NA	0.533582	0.851874	NA	0.131407	0.934711	NA	-1.25749	0.432681	NA	0.942368	0.547396	0.884192	0.833762	0.344669	0.272992	0.501977	0.518762	0.434415	0.601806
70720	6330407A03Rik	NA	-0.460677	0.233965	0.509963	-0.790957	0.0666492	0.163769	-1.35069	0.025045	0.160787	-0.276771	0.220914	0.484192	-0.657875	0.0397619	0.135556	4.6192	4.8404	4.77552	5.13374	5.76665	6.29288	5.6864	6.11488	5.1881	5.62005
70730	6330409D20Rik	ENSMUSG00000009551	0.310243	0.381681	0.648021	1.37492	0.117697	NA	-0.349279	0.690376	NA	0.298757	0.786637	NA	0.997056	0.188608	NA	3.37242	3.16102	2.41185	1.87762	1.96365	2.18821	2.12942	1.96078	2.44106	2.0345
319224	6330410L21Rik	NA	NA	NA	NA	NA	NA	NA	NA	NA	NA	0.767352	0.828094	NA	NA	NA	NA	-2.40128	-2.40155	-2.39732	-2.39758	-2.38622	-2.39492	-2.39339	-2.39267	-2.39665	-2.39655
70725	6330411D24Rik	NA	NA	NA	NA	NA	NA	NA	NA	NA	NA	NA	NA	NA	NA	NA	NA	0	0	0	0	0	0	0	0	0	0
70753	6330415B21Rik	NA	NA	NA	NA	NA	NA	NA	NA	NA	NA	NA	NA	NA	NA	NA	NA	0	0	0	0	0	0	0	0	0	0
320020	6330415G19Rik	NA	-0.0325434	0.938499	0.972447	0.0135366	0.987029	NA	0.311947	0.623841	NA	0.316639	0.700772	NA	0.162157	0.737218	0.858783	3.11929	3.14218	2.3191	2.29724	2.85533	2.71713	2.67626	2.53588	3.17563	3.08828
69004	6330418K02Rik	NA	-0.473899	0.0295129	0.172528	-0.798179	0.0286529	0.0979079	-0.348415	0.439196	0.691235	-0.331752	0.371727	0.642649	-0.163276	0.600308	0.771958	4.98589	5.28577	4.14544	4.55904	4.28262	4.30165	4.3201	4.67694	4.83389	4.92667
319551	6330420H09Rik	NA	0.00470622	0.998937	NA	NA	NA	NA	NA	NA	NA	NA	NA	NA	-1.28709	0.71416	NA	-2.17774	-2.1784	-2.18948	-2.19012	-2.18388	-2.18365	-2.17993	-2.17819	-2.18787	-2.14485
229613	6330549D23Rik	NA	0.145639	0.51817	0.748242	-0.289348	0.385679	0.533585	-0.271409	0.52196	0.74939	0.14716	0.728397	0.882806	-0.25113	0.445842	0.649915	5.20388	5.10712	4.77569	4.90095	4.5222	4.54552	4.39003	4.48418	4.69905	4.86386
76880	6430411K18Rik	NA	NA	NA	NA	NA	NA	NA	NA	NA	NA	NA	NA	NA	NA	NA	NA	0	0	0	0	0	0	0	0	0	0
381933	6430531B16Rik	ENSMUSG00000073795	-0.179189	0.601636	0.804205	-0.543957	0.0760692	0.178047	0.234747	0.661912	NA	-0.416242	0.614757	NA	0.482153	0.422535	NA	3.92318	4.02812	4.13235	4.50249	3.35136	3.33621	2.98165	3.03433	3.31096	3.09862
234797	6430548M08Rik	ENSMUSG00000031824	0.0131887	0.859286	0.938323	0.166468	0.0980174	0.210663	0.0607121	0.757348	0.886057	0.822609	7.68246e-06	0.000176596	0.131197	0.29289	0.503842	9.79666	9.77967	9.74251	9.60534	8.14261	8.17001	8.12634	7.61557	9.19831	9.10284
320095	6430550D23Rik	ENSMUSG00000074646	-0.235575	0.551275	0.767939	-0.461997	0.448829	NA	-0.219488	0.727174	NA	-0.0849714	0.908982	NA	0.231809	0.689379	NA	3.48079	3.57151	3.01762	3.17252	2.77413	2.92757	2.81227	2.80057	3.01856	2.90329
320893	6430562O15Rik	NA	-1.00531	0.17942	NA	-1.90737	0.0804625	NA	-0.476659	0.557066	NA	-0.0247497	0.979931	NA	0.213479	0.722323	NA	1.68418	2.04527	1.45926	1.92062	1.75522	2.06408	1.9469	1.84855	2.30555	2.19581
235599	6430571L13Rik	ENSMUSG00000037977	-0.552594	0.562289	NA	0.142027	0.83575	NA	0.200022	0.65236	0.827332	0.770665	0.778575	NA	0.771642	0.64058	NA	1.63678	1.85751	2.25026	2.13104	2.63045	3.09109	1.98166	1.29304	1.49301	1.34492
330324	6430584L05Rik	NA	NA	NA	NA	-0.727633	0.836864	NA	NA	NA	NA	NA	NA	NA	NA	NA	NA	-2.40033	-2.40056	-2.39706	-2.39	-2.39515	-2.39507	-2.3938	-2.39321	-2.39651	-2.39642
78605	6430706D22Rik	NA	NA	NA	NA	NA	NA	NA	NA	NA	NA	NA	NA	NA	NA	NA	NA	0	0	0	0	0	0	0	0	0	0
76220	6530402F18Rik	NA	-0.242479	0.151112	0.408297	0.136352	0.378745	0.526589	0.122798	0.32827	0.602224	0.107051	0.32804	0.603114	-0.0138203	0.933834	0.967721	7.3939	7.51696	7.69365	7.60143	9.13902	8.88336	9.43639	9.53981	9.46678	9.49574
76224	6530409C15Rik	NA	0.554157	0.311811	NA	0.908779	0.112895	0.23114	0.43148	0.143883	0.393868	-0.246329	0.343378	0.618024	0.91466	0.000408745	0.00472616	4.01344	3.78548	4.4372	4.03057	5.9222	5.5931	6.13873	6.36587	5.769	5.17654
67791	6530411M01Rik	NA	NA	NA	NA	NA	NA	NA	NA	NA	NA	NA	NA	NA	0.706689	0.841496	NA	-2.40024	-2.40046	-2.39703	-2.39724	-2.39516	-2.39509	-2.39385	-2.39327	-2.38937	-2.39641
78073	6720468P15Rik	NA	0.0104583	0.997219	NA	2.5648	0.172451	NA	1.3767	0.696391	NA	NA	NA	NA	1.72137	0.382192	NA	-1.23269	-1.24056	-0.916514	-1.26065	-1.23959	-1.30643	-1.2271	-1.28918	-1.05008	-1.25156
77741	6720483E21Rik	NA	0.0128434	0.9971	NA	-0.703356	0.797815	NA	0.623446	0.859961	NA	NA	NA	NA	NA	NA	NA	-2.039	-2.04	-2.0247	-1.9939	-2.01638	-2.04778	-2.04226	-2.03968	-2.05405	-2.05367
211378	6720489N17Rik	ENSMUSG00000072066	-0.00616883	0.966813	0.985421	0.116787	0.567966	0.6938	0.16596	0.566672	0.774428	1.03326	0.00220195	0.0182109	0.0502289	0.828909	0.914097	6.42712	6.42504	6.16436	6.06561	5.43002	5.26643	5.44274	4.9713	5.96083	5.91452
228778	6820408C15Rik	ENSMUSG00000032680	1.23477	0.633039	NA	1.4374	0.683961	NA	0.623446	0.859961	NA	-0.675316	0.848446	NA	NA	NA	NA	-1.82583	-1.90455	-1.84713	-1.92578	-1.91447	-1.91405	-1.86855	-1.86541	-1.92171	-1.92124
100126203	6820426E19Rik	NA	NA	NA	NA	NA	NA	NA	NA	NA	NA	NA	NA	NA	NA	NA	NA	0	0	0	0	0	0	0	0	0	0
547150	6820431F20Rik	NA	0.548105	0.249917	0.525036	1.21035	0.0278783	NA	0.250006	0.584951	0.787027	0.374752	0.385618	0.655017	0.528941	0.195537	0.393688	3.52272	3.22173	3.6578	3.06125	3.94487	3.65643	3.88143	3.87254	3.94512	3.63431
546157	7420426K07Rik	ENSMUSG00000074123	NA	NA	NA	NA	NA	NA	NA	NA	NA	NA	NA	NA	NA	NA	NA	0	0	0	0	0	0	0	0	0	0
74517	7420700N18Rik	NA	NA	NA	NA	NA	NA	NA	0.623446	0.859961	NA	NA	NA	NA	NA	NA	NA	-2.40099	-2.40125	-2.39724	-2.39748	-2.38673	-2.39496	-2.39351	-2.39284	-2.39661	-2.39651
71457	7420701I03Rik	NA	NA	NA	NA	NA	NA	NA	NA	NA	NA	NA	NA	NA	NA	NA	NA	0	0	0	0	0	0	0	0	0	0
328577	7530416G11Rik	ENSMUSG00000096607	NA	NA	NA	NA	NA	NA	NA	NA	NA	0.767352	0.828094	NA	-0.735979	0.83502	NA	-2.33439	-2.33485	-2.3277	-2.32814	-2.30897	-2.32365	-2.32107	-2.31986	-2.32658	-2.31156
77119	7630403G23Rik	NA	NA	NA	NA	NA	NA	NA	NA	NA	NA	NA	NA	NA	NA	NA	NA	0	0	0	0	0	0	0	0	0	0
78609	8030411F24Rik	ENSMUSG00000027444	NA	NA	NA	NA	NA	NA	NA	NA	NA	NA	NA	NA	NA	NA	NA	0	0	0	0	0	0	0	0	0	0
211001	8030423F21Rik	NA	NA	NA	NA	NA	NA	NA	NA	NA	NA	NA	NA	NA	NA	NA	NA	0	0	0	0	0	0	0	0	0	0
77166	8030423J24Rik	ENSMUSG00000021600	NA	NA	NA	NA	NA	NA	NA	NA	NA	NA	NA	NA	NA	NA	NA	0	0	0	0	0	0	0	0	0	0
77543	8030442B05Rik	NA	NA	NA	NA	NA	NA	NA	0.623446	0.859961	NA	-1.70095	0.391733	NA	-0.551534	0.839481	NA	-1.82642	-1.82806	-1.80279	-1.80434	-1.73658	-1.78847	-1.72689	-1.51282	-1.74638	-1.69329
77173	8030443G20Rik	NA	NA	NA	NA	NA	NA	NA	NA	NA	NA	NA	NA	NA	NA	NA	NA	0	0	0	0	0	0	0	0	0	0
100504061	8030451A03Rik	NA	-1.06552	0.362411	NA	-0.419262	0.639536	NA	-0.804844	0.399643	NA	-0.640704	0.408561	NA	0.191582	0.840489	NA	1.04788	1.30062	1.34336	1.46868	1.42853	1.6673	1.57505	1.94635	1.44688	1.39618
77209	8030453O22Rik	NA	0.548208	0.0421769	0.209124	0.692157	0.066035	0.162884	0.830514	0.104933	0.33611	0.437936	0.245954	0.516609	0.452484	0.123649	0.294813	5.28563	4.89753	5.03251	4.59935	4.58344	3.93959	4.58645	4.61021	5.0157	4.73011
212163	8030462N17Rik	ENSMUSG00000047466 /// ENSMUSG00000116473	0.298317	0.0409335	0.205219	0.771524	0.00171865	0.0209424	0.254403	0.209885	0.47806	0.00597293	0.963167	0.986921	0.246141	0.207248	0.407513	7.6283	7.43908	8.22235	7.6818	8.46835	8.23783	8.50251	8.55012	8.20824	8.06791
382231	8030474K03Rik	ENSMUSG00000046774	0.874757	0.794551	NA	1.00907	0.761644	NA	-0.365924	0.860007	NA	1.14162	0.575382	NA	-0.210077	0.950459	NA	0.245987	0.349412	0.313738	0.398377	0.141485	0.30454	0.281676	0.152553	0.119729	0.451531
74529	8430422H06Rik	NA	NA	NA	NA	NA	NA	NA	NA	NA	NA	NA	NA	NA	NA	NA	NA	0	0	0	0	0	0	0	0	0	0
71473	8430423G03Rik	NA	1.23211	0.628962	NA	-1.44271	0.369843	NA	-0.819222	0.816674	NA	NA	NA	NA	-1.17668	0.645044	NA	-1.20522	-1.32369	-1.16935	-0.98381	-1.33937	-1.27231	-1.32711	-1.32172	-1.28541	-1.16213
78102	8430426J06Rik	NA	NA	NA	NA	NA	NA	NA	NA	NA	NA	NA	NA	NA	0.706689	0.841496	NA	-2.40007	-2.40028	-2.39698	-2.39719	-2.39519	-2.39511	-2.39392	-2.39336	-2.38962	-2.39638
71523	8430429K09Rik	NA	0.0902031	0.675348	0.846588	0.00364175	0.987193	0.992091	0.175356	0.54489	0.76351	0.182812	0.586231	0.800174	-0.0386765	0.87313	0.937742	5.72155	5.66514	5.52836	5.51261	5.26398	5.1549	5.16928	5.0573	5.48239	5.50184
78103	8430431K14Rik	NA	0.131968	0.957044	NA	-1.86025	0.217652	NA	1.0854	0.560469	NA	0.770467	0.776083	NA	NA	NA	NA	-0.977283	-1.00533	-0.967893	-0.644027	-0.881461	-0.944111	-0.855092	-0.998383	-1.1089	-1.10797
71510	8430436N08Rik	NA	NA	NA	NA	NA	NA	NA	NA	NA	NA	NA	NA	NA	NA	NA	NA	0	0	0	0	0	0	0	0	0	0
74541	8430437L04Rik	NA	NA	NA	NA	NA	NA	NA	NA	NA	NA	NA	NA	NA	NA	NA	NA	0	0	0	0	0	0	0	0	0	0
100041574	9030025P20Rik	ENSMUSG00000116953	-0.191217	0.474585	0.720355	-0.380474	0.30983	0.459134	-0.11948	0.740222	0.877432	0.248125	0.580771	0.796693	-0.287252	0.378494	0.589313	4.53134	4.64478	4.18082	4.37974	4.36523	4.41929	4.30086	4.22104	4.40019	4.56462
77665	9030204H09Rik	NA	0.734173	0.835418	NA	1.3095	0.709184	NA	NA	NA	NA	0.767352	0.828094	NA	NA	NA	NA	-2.17745	-2.20324	-2.14119	-2.19193	-2.18463	-2.18437	-2.15501	-2.17798	-2.1893	-2.189
71528	9030404E10Rik	NA	-0.596599	0.855789	NA	0.605885	0.858959	NA	-0.819222	0.816674	NA	NA	NA	NA	NA	NA	NA	-1.9707	-1.9371	-1.92039	-1.9561	-1.98066	-1.9456	-1.97425	-1.97143	-1.98714	-1.98672
100504389	9030407P20Rik	NA	-0.275289	0.141956	0.394546	-0.409434	0.124325	0.246733	0.0437172	0.87915	0.947872	0.129089	0.692908	0.863888	-0.0116117	0.959752	0.979725	5.6685	5.84439	5.03239	5.26035	5.08014	5.12212	5.25469	5.13181	5.58484	5.5879
74530	9030612E09Rik	NA	-0.708495	0.841097	NA	NA	NA	NA	NA	NA	NA	-0.675316	0.848446	NA	-0.01464	0.996694	NA	-2.20175	-2.17827	-2.19083	-2.19155	-2.18448	-2.18421	-2.17999	-2.15379	-2.16476	-2.16447
105892	9030619P08Rik	NA	NA	NA	NA	NA	NA	NA	NA	NA	NA	NA	NA	NA	NA	NA	NA	0	0	0	0	0	0	0	0	0	0
66808	9030624G23Rik	ENSMUSG00000073158	-0.303289	0.771955	NA	0.357296	0.76772	NA	-1.05892	0.570569	NA	0.258318	0.810702	NA	0.334947	0.667981	NA	1.08453	1.21256	0.991751	0.905028	0.898551	0.905811	1.12128	1.14583	1.45405	1.32447
71603	9130004J05Rik	NA	-0.194652	0.590538	0.796517	-1.02555	0.00908017	0.0518459	-0.354372	0.460961	0.707674	-0.197754	0.799403	NA	0.0517853	0.930509	0.965389	4.3988	4.47542	5.29763	5.90664	4.58058	5.00446	3.8735	3.55429	3.71425	3.67969
71583	9130008F23Rik	ENSMUSG00000054951	-0.0648508	0.724524	0.871096	0.186067	0.355008	0.50373	0.209648	0.350371	0.620984	0.376396	0.393208	0.661514	0.592945	0.0615602	0.185671	5.89964	5.9281	5.82127	5.68269	5.66554	5.75029	5.07611	4.66847	5.1951	4.86411
71581	9130015A21Rik	NA	1.3507	0.381997	NA	0.505522	0.489166	NA	0.408474	0.507953	NA	-0.0617851	0.932682	NA	0.58778	0.558942	NA	1.4102	1.18085	1.98667	1.75754	2.27047	2.07969	2.12421	2.2079	1.71923	1.5352
71613	9130015L21Rik	NA	NA	NA	NA	NA	NA	NA	NA	NA	NA	NA	NA	NA	NA	NA	NA	0	0	0	0	0	0	0	0	0	0
72804	9130017K11Rik	NA	-0.708495	0.841097	NA	-0.0298491	0.992113	NA	NA	NA	NA	NA	NA	NA	NA	NA	NA	-2.1365	-2.10879	-2.0664	-2.06725	-2.11611	-2.11581	-2.11083	-2.1085	-2.12146	-2.12111
78921	9130019O22Rik	ENSMUSG00000030823	0.0813984	0.65002	0.831764	0.1593	0.406057	0.552854	0.513827	0.0254916	0.161506	-0.198934	0.310076	0.584442	-0.217647	0.232701	0.437135	6.58902	6.54237	6.3841	6.26693	6.29029	5.96288	6.4226	6.56753	6.43747	6.58198
100042056	9130019P16Rik	NA	-0.750431	0.384129	NA	0.160418	0.791885	NA	-0.275319	0.874362	NA	1.42444	0.471581	NA	1.84224	0.165906	NA	1.17191	1.49318	1.83389	1.74497	0.90455	0.937188	0.988652	0.84181	1.2979	0.838042
100043133	9130023H24Rik	ENSMUSG00000062944	0.282134	0.0753584	0.28492	0.198566	0.41635	0.561924	0.324274	0.0841135	0.30151	0.0342415	0.829331	0.930055	0.00912609	0.948997	0.974518	6.83115	6.6466	6.26373	6.13875	6.83843	6.54949	7.00742	7.07415	7.37377	7.36132
329160	9130024F11Rik	NA	0.723044	0.162622	0.423837	0.417221	0.624821	NA	1.05779	0.301828	NA	1.16362	0.513368	NA	1.9922	0.286559	NA	2.31324	1.92533	1.76849	1.51698	1.48041	1.28165	1.42599	1.04748	1.16193	0.912298
229550	9130204L05Rik	ENSMUSG00000091175	NA	NA	NA	NA	NA	NA	NA	NA	NA	NA	NA	NA	NA	NA	NA	0	0	0	0	0	0	0	0	0	0
77700	9130208D14Rik	NA	-1.04659	0.0179359	0.132878	-0.641263	0.107032	0.22312	-1.35611	0.0274402	0.16848	-1.69526	8.68713e-05	0.00137496	-0.450277	0.139863	0.318551	3.67998	4.18243	4.17723	4.48628	3.97936	4.22033	4.14032	5.38093	4.73017	5.02272
77668	9130209A04Rik	NA	NA	NA	NA	NA	NA	NA	NA	NA	NA	NA	NA	NA	NA	NA	NA	0	0	0	0	0	0	0	0	0	0
100038433	9130213A22Rik	NA	-0.23277	0.794664	NA	-1.22636	0.635137	NA	0.452284	0.747133	NA	0.773511	0.775247	NA	0.651224	0.61195	NA	0.52359	0.611868	0.0530715	0.177572	0.309664	0.347975	0.305037	0.104499	0.563508	0.476843
330350	9130221F21Rik	NA	NA	NA	NA	NA	NA	NA	NA	NA	NA	0.767352	0.828094	NA	NA	NA	NA	-2.40143	-2.40171	-2.39736	-2.39762	-2.39499	-2.39489	-2.38429	-2.39259	-2.39668	-2.39657
77124	9130221H12Rik	NA	-0.129398	0.359883	0.629921	0.0892143	0.676205	0.780421	0.231014	0.286625	0.562041	-0.200968	0.249459	0.520415	-0.151711	0.308087	0.519228	7.10734	7.19023	6.47128	6.39939	6.60101	6.35624	6.74614	6.99257	6.98022	7.07817
329159	9130227L01Rik	NA	NA	NA	NA	NA	NA	NA	NA	NA	NA	0.767352	0.828094	NA	NA	NA	NA	-2.40143	-2.40171	-2.39736	-2.39762	-2.39499	-2.39489	-2.38429	-2.39259	-2.39668	-2.39657
231253	9130230L23Rik	NA	0.391231	0.296781	0.571733	0.630183	0.0646936	0.161102	0.858184	0.0621307	0.25977	0.21107	0.634216	0.829214	0.742017	0.0638253	0.190368	4.14718	3.94907	4.5576	4.1325	4.14921	3.66916	4.17688	4.0849	4.24253	3.83749
75758	9130401M01Rik	ENSMUSG00000101892 /// ENSMUSG00000116094	-0.130095	0.299098	0.574107	-0.408027	0.013988	0.0656065	-0.10443	0.475695	0.717429	0.185098	0.0417182	0.16518	-0.0871673	0.4928	0.690088	9.34024	9.40935	9.19133	9.42049	9.51504	9.47595	9.80245	9.7918	9.94725	10.0045
619326	9130409I23Rik	ENSMUSG00000038768	NA	NA	NA	-0.00629435	0.998579	NA	NA	NA	NA	NA	NA	NA	NA	NA	NA	-2.33331	-2.33372	-2.31396	-2.31435	-2.3238	-2.32365	-2.32133	-2.32025	-2.32629	-2.32613
619293	9230009I02Rik	NA	NA	NA	NA	NA	NA	NA	NA	NA	NA	NA	NA	NA	NA	NA	NA	0	0	0	0	0	0	0	0	0	0
215728	9230019H11Rik	NA	NA	NA	NA	NA	NA	NA	NA	NA	NA	NA	NA	NA	NA	NA	NA	0	0	0	0	0	0	0	0	0	0
619299	9230020A06Rik	NA	NA	NA	NA	NA	NA	NA	NA	NA	NA	NA	NA	NA	NA	NA	NA	0	0	0	0	0	0	0	0	0	0
109335	9230102K24Rik	NA	NA	NA	NA	NA	NA	NA	NA	NA	NA	NA	NA	NA	NA	NA	NA	0	0	0	0	0	0	0	0	0	0
77682	9230102O04Rik	NA	NA	NA	NA	NA	NA	NA	-0.819222	0.816674	NA	NA	NA	NA	NA	NA	NA	-2.40073	-2.40097	-2.39716	-2.3974	-2.39509	-2.3871	-2.39363	-2.39299	-2.39657	-2.39647
77705	9230104L09Rik	ENSMUSG00000027446	NA	NA	NA	NA	NA	NA	NA	NA	NA	NA	NA	NA	NA	NA	NA	0	0	0	0	0	0	0	0	0	0
320626	9230105E05Rik	NA	1.3956	0.217982	NA	2.24763	0.0617823	NA	-0.061817	0.973885	NA	0.0294357	0.990262	NA	1.29317	0.610879	NA	0.342262	-0.0239918	0.477042	-0.0774489	-0.120088	-0.0607392	-0.045823	-0.0932704	-0.0823207	-0.206858
223413	9230109A22Rik	NA	NA	NA	NA	0.715035	0.83965	NA	NA	NA	NA	-0.675316	0.848446	NA	NA	NA	NA	-2.33454	-2.33501	-2.31272	-2.3282	-2.32381	-2.32365	-2.32103	-2.30477	-2.32662	-2.32644
77080	9230110F15Rik	ENSMUSG00000047980	NA	NA	NA	NA	NA	NA	NA	NA	NA	NA	NA	NA	NA	NA	NA	0	0	0	0	0	0	0	0	0	0
78243	9230112D13Rik	ENSMUSG00000021797	NA	NA	NA	NA	NA	NA	NA	NA	NA	NA	NA	NA	NA	NA	NA	0	0	0	0	0	0	0	0	0	0
100504561	9230112J17Rik	NA	NA	NA	NA	NA	NA	NA	NA	NA	NA	NA	NA	NA	NA	NA	NA	0	0	0	0	0	0	0	0	0	0
414108	9230114K14Rik	NA	-0.199712	0.416637	0.67619	-0.478574	0.119088	0.240237	0.0895154	0.816014	0.920655	-0.169812	0.70367	0.868936	-0.321362	0.511564	0.704619	4.71778	4.84067	4.56847	4.83003	4.17548	4.32106	4.32966	4.23614	3.86633	3.99794
320054	9230116N13Rik	NA	0.0209757	0.940417	0.973582	0.171512	0.612396	0.730806	-0.2051	0.594426	0.793115	-0.149004	0.734097	0.885689	-0.108983	0.78939	0.891089	4.73818	4.71353	4.30633	4.1969	4.22035	4.31006	4.08374	4.20873	4.15653	4.21675
100048895	9330020H09Rik	NA	-0.226749	0.220746	0.495518	-0.30765	0.0741226	0.175252	-0.101231	0.671383	0.837082	0.201925	0.446829	0.704139	-0.0134942	0.96075	0.980322	5.96894	6.10435	6.44667	6.63836	5.99737	6.07634	5.82505	5.69481	5.82328	5.82671
330427	9330102E08Rik	NA	-0.495688	0.458778	NA	0.275407	0.687862	NA	-0.916275	0.407312	NA	-0.238725	0.903029	NA	0.403757	0.717394	NA	1.65748	1.86394	1.74731	1.60299	1.34832	1.46156	0.980254	1.11162	1.402	1.25511
320950	9330104G04Rik	NA	-0.123333	0.609674	0.809054	-0.260858	0.452415	0.59529	-0.62572	0.451894	NA	-0.302051	0.650357	NA	-0.304487	0.340597	0.553217	4.73765	4.8255	4.07889	4.22513	3.11439	3.17515	3.29023	3.57083	4.44497	4.63654
319983	9330111N05Rik	NA	0.734173	0.835418	NA	NA	NA	NA	NA	NA	NA	NA	NA	NA	NA	NA	NA	-2.39355	-2.3997	-2.39683	-2.39701	-2.39527	-2.3952	-2.39416	-2.39368	-2.39638	-2.39631
328957	9330117O12Rik	NA	NA	NA	NA	NA	NA	NA	NA	NA	NA	NA	NA	NA	NA	NA	NA	0	0	0	0	0	0	0	0	0	0
100689703	9330133O14Rik	NA	-0.19688	0.114645	0.354686	-0.2401	0.146915	0.275669	-0.0172511	0.947414	0.977657	0.368865	0.091519	0.280394	0.115362	0.411944	0.621625	7.24853	7.37876	6.79599	6.9316	6.14828	6.03027	6.4854	6.40309	7.44609	7.35608
414085	9330151L19Rik	NA	0.089805	0.617383	0.813971	0.190679	0.493496	0.631487	0.351231	0.296472	0.57142	0.279336	0.289872	0.564237	0.472732	0.0146659	0.0682644	7.10696	7.02061	5.809	5.66053	5.77836	5.524	5.94292	5.8303	6.65027	6.33803
442799	9330154J02Rik	NA	NA	NA	NA	-0.501237	0.55314	NA	0.425883	0.370286	0.636306	0.0140788	0.991296	NA	-1.49406	0.671953	NA	0.571572	0.567513	1.22913	1.42341	2.16859	2.32981	1.63641	1.16346	0.63962	0.786722
319829	9330154K18Rik	NA	1.44737	0.682028	NA	0.819823	0.222127	NA	0.359842	0.820212	NA	1.95983	0.252688	NA	0.731399	0.662011	NA	0.180737	0.0481191	1.38988	0.958691	0.735106	0.34285	0.372643	0.277849	0.389817	0.304425
319472	9330158H04Rik	NA	NA	NA	NA	NA	NA	NA	NA	NA	NA	-0.675316	0.848446	NA	NA	NA	NA	-2.40143	-2.40171	-2.39736	-2.39762	-2.39499	-2.39489	-2.39332	-2.38356	-2.39668	-2.39657
212448	9330159F19Rik	ENSMUSG00000004360	0.734173	0.835418	NA	NA	NA	NA	-0.0880435	0.98011	NA	NA	NA	NA	NA	NA	NA	-2.24817	-2.26771	-2.25858	-2.25914	-2.23466	-2.23445	-2.25011	-2.24857	-2.25715	-2.25692
319673	9330159M07Rik	NA	-0.227827	0.501644	0.738298	0.335879	0.238384	0.382355	0.444785	0.121127	0.359107	1.62501	0.000228576	0.00306547	0.903628	0.0184069	0.0797932	4.33427	4.44323	4.85863	4.62081	4.88465	4.68073	4.90931	3.91968	4.62554	4.12285
320272	9330162B11Rik	NA	NA	NA	NA	NA	NA	NA	NA	NA	NA	NA	NA	NA	NA	NA	NA	0	0	0	0	0	0	0	0	0	0
320377	9330175E14Rik	NA	0.0376609	0.941651	0.97385	0.503637	0.372986	NA	0.475092	0.01297	0.111374	-0.164686	0.391338	0.659812	0.503713	0.0102639	0.0536507	4.58266	4.59765	4.49475	4.31192	6.74806	6.38021	6.8507	7.0344	6.57069	6.23305
442821	9330175M20Rik	NA	NA	NA	NA	NA	NA	NA	NA	NA	NA	NA	NA	NA	NA	NA	NA	0	0	0	0	0	0	0	0	0	0
329780	9330178D15Rik	NA	NA	NA	NA	NA	NA	NA	NA	NA	NA	NA	NA	NA	NA	NA	NA	0	0	0	0	0	0	0	0	0	0
77558	9330179D12Rik	NA	-0.126046	0.887662	NA	-0.204189	0.798693	NA	0.0470228	0.906964	0.959269	-0.506173	0.184495	0.438947	-1.01465	0.0109487	0.0556749	2.48261	2.50809	2.70153	2.73328	3.96833	3.8266	3.88091	4.28175	3.48067	4.07269
231014	9330182L06Rik	ENSMUSG00000056004	0.316573	0.2194	0.494073	0.384243	0.239395	0.383753	0.305499	0.344247	0.615479	-0.425896	0.236914	0.505675	0.470714	0.207081	0.407249	5.03233	4.83171	5.13433	4.86001	5.14761	4.97313	4.80957	4.99987	4.66032	4.40997
328531	9330182O14Rik	ENSMUSG00000094112	-1.06189	0.641612	NA	-0.00629435	0.998579	NA	NA	NA	NA	-0.675316	0.848446	NA	-0.735979	0.83502	NA	-1.83643	-1.7119	-1.81753	-1.81877	-1.84847	-1.84802	-1.84072	-1.79537	-1.85631	-1.81386
380930	9330188P03Rik	NA	NA	NA	NA	NA	NA	NA	NA	NA	NA	-0.675316	0.848446	NA	NA	NA	NA	-2.40143	-2.40172	-2.39736	-2.39763	-2.39499	-2.39489	-2.39332	-2.38354	-2.39668	-2.39657
77265	9430002A10Rik	NA	-0.460709	0.291503	0.566463	-0.481679	0.380015	NA	0.318727	0.508271	0.741311	0.708498	0.28036	NA	-0.0236	0.974875	NA	3.13713	3.38975	2.9173	3.1199	3.27912	3.27701	3.3126	2.802	2.67083	2.67757
381572	9430007A20Rik	ENSMUSG00000028593	NA	NA	NA	NA	NA	NA	NA	NA	NA	NA	NA	NA	NA	NA	NA	0	0	0	0	0	0	0	0	0	0
77248	9430014N10Rik	NA	NA	NA	NA	NA	NA	NA	NA	NA	NA	NA	NA	NA	NA	NA	NA	0	0	0	0	0	0	0	0	0	0
230996	9430015G10Rik	ENSMUSG00000059939	-0.0715861	0.54623	0.764939	-0.0918778	0.376266	0.524378	0.152338	0.341035	0.612999	-0.125131	0.419497	0.68358	-0.00294312	0.985712	0.993165	8.87112	8.90861	8.33604	8.37909	7.95057	7.991	7.74316	7.68131	7.91624	7.91197
319812	9430018G01Rik	NA	-2.95845	0.129749	NA	2.5565	0.261665	NA	NA	NA	NA	NA	NA	NA	NA	NA	NA	-1.75517	-1.48628	-1.50564	-1.7359	-1.72254	-1.72204	-1.71407	-1.71036	-1.73109	-1.73053
77269	9430019J16Rik	NA	NA	NA	NA	NA	NA	NA	NA	NA	NA	NA	NA	NA	NA	NA	NA	0	0	0	0	0	0	0	0	0	0
77288	9430021M05Rik	NA	NA	NA	NA	NA	NA	NA	NA	NA	NA	NA	NA	NA	NA	NA	NA	0	0	0	0	0	0	0	0	0	0
100502928	9430032J07Rik	NA	0.88368	0.66925	NA	0.715035	0.83965	NA	0.623446	0.859961	NA	-1.24787	0.722459	NA	1.30261	0.710669	NA	-1.50904	-1.60375	-1.63076	-1.68441	-1.6692	-1.66864	-1.60746	-1.55112	-1.57472	-1.67831
320692	9430037G07Rik	NA	0.327539	0.467436	0.714965	0.948578	0.00965288	0.0536049	0.659132	0.0717393	0.278478	0.101093	0.876045	NA	0.731078	0.129718	0.303377	3.69804	3.52277	4.29593	3.69596	4.18333	4.02365	3.61714	3.31943	4.01222	3.59992
77252	9430038I01Rik	ENSMUSG00000040139	-0.0526816	0.748001	0.884222	-0.348931	0.0983454	0.211148	-0.0776314	0.619999	0.80972	0.553507	0.00017506	0.00243643	0.194383	0.305309	0.516729	8.39761	8.40905	8.34115	8.5398	8.09035	8.18002	8.03008	7.64462	8.0357	7.91758
77323	9430041J12Rik	NA	1.00793	0.737093	NA	1.71094	0.406841	NA	0.623446	0.859961	NA	-0.675316	0.848446	NA	1.93179	0.542076	NA	-1.45825	-1.54698	-1.34919	-1.52074	-1.50409	-1.56052	-1.55059	-1.48892	-1.40066	-1.5711
100037260	9430060I03Rik	NA	-0.150969	0.745277	0.882645	0.174027	0.848892	NA	0.186835	0.761027	NA	0.63979	0.289141	NA	0.628337	0.291761	0.502547	2.89175	2.96959	2.35817	2.32882	2.79929	2.80195	3.16946	2.76617	3.01842	2.71096
77358	9430069I07Rik	ENSMUSG00000094447	1.41444	0.482527	NA	-2.73639	0.166639	NA	-0.819222	0.816674	NA	NA	NA	NA	NA	NA	NA	-1.42677	-1.56394	-1.63646	-1.38266	-1.62307	-1.57146	-1.61363	-1.60949	-1.63261	-1.63199
320321	9430077A04Rik	NA	NA	NA	NA	NA	NA	NA	NA	NA	NA	NA	NA	NA	NA	NA	NA	0	0	0	0	0	0	0	0	0	0
77428	9430083A17Rik	NA	-0.0110244	0.97587	0.989897	-0.512114	0.550338	NA	-0.144962	0.955948	NA	0.0191143	0.989527	NA	1.988	0.0728828	NA	3.0146	3.03718	1.70356	1.84297	1.26312	1.27586	1.46092	1.47436	1.96061	1.37347
434350	9430091E24Rik	NA	0.280048	0.137995	0.389026	0.671482	0.0485434	0.134878	-0.0917184	0.766311	0.891919	0.218254	0.557605	0.780673	0.488902	0.0642918	0.191206	5.87372	5.67456	5.1324	4.73056	5.07665	5.01796	4.86255	4.86185	5.36872	5.06816
77432	9530002B09Rik	ENSMUSG00000023263	NA	NA	NA	NA	NA	NA	NA	NA	NA	NA	NA	NA	NA	NA	NA	0	0	0	0	0	0	0	0	0	0
77397	9530003J23Rik	ENSMUSG00000020177	NA	NA	NA	NA	NA	NA	NA	NA	NA	NA	NA	NA	0.706689	0.841496	NA	-2.40053	-2.40077	-2.39711	-2.39733	-2.39512	-2.39504	-2.39372	-2.3931	-2.38895	-2.39645
77341	9530026F06Rik	NA	NA	NA	NA	NA	NA	NA	NA	NA	NA	NA	NA	NA	NA	NA	NA	0	0	0	0	0	0	0	0	0	0
330385	9530026P05Rik	NA	NA	NA	NA	NA	NA	NA	NA	NA	NA	NA	NA	NA	NA	NA	NA	0	0	0	0	0	0	0	0	0	0
100500713	9530027J09Rik	NA	0.437547	0.348026	0.619357	1.46486	0.0567749	NA	0.572485	0.307078	NA	0.633994	0.227556	0.49243	0.852426	0.0516262	0.163327	3.59869	3.30613	3.32534	2.63922	3.58634	3.12128	3.40856	3.25682	3.74464	3.27617
78616	9530036M11Rik	NA	-1.96874	0.54392	NA	1.47369	0.676276	NA	NA	NA	NA	NA	NA	NA	NA	NA	NA	-2.13346	-2.05737	-2.07065	-2.12268	-2.11519	-2.11492	-2.11046	-2.10838	-2.11998	-2.11967
654796	9530036O11Rik	NA	NA	NA	NA	NA	NA	NA	NA	NA	NA	-0.675316	0.848446	NA	NA	NA	NA	-2.40087	-2.40113	-2.3972	-2.39745	-2.39507	-2.39498	-2.39357	-2.38477	-2.39659	-2.39649
319781	9530051G07Rik	NA	-1.44807	0.681728	NA	-0.727633	0.836864	NA	1.3767	0.696391	NA	NA	NA	NA	-0.733074	0.795259	NA	-1.94348	-1.86512	-1.92555	-1.88692	-1.87531	-1.91468	-1.86795	-1.90452	-1.88274	-1.84246
320229	9530052C20Rik	NA	0.369459	0.402925	0.665792	0.133231	0.817484	NA	0.627143	0.240579	NA	0.123908	0.836116	0.93255	0.232488	0.690185	0.830315	3.34515	3.12045	3.10962	2.99575	3.35884	3.04978	3.24344	3.14632	3.1525	3.06617
619321	9530052E02Rik	NA	-0.725354	0.796919	NA	1.53154	0.318016	NA	-0.47211	0.791056	NA	NA	NA	NA	-0.01464	0.996694	NA	-1.12438	-1.05912	-0.729714	-0.970226	-1.01416	-0.864144	-1.06169	-1.12704	-1.08966	-1.08933
319482	9530053A07Rik	ENSMUSG00000078776	-1.24102	0.296699	NA	-0.675097	0.637688	NA	-1.29929	0.544206	NA	-1.05732	0.586144	NA	-0.956722	0.604965	NA	-0.0349206	0.24555	-0.0503476	0.0942235	-0.10871	0.0444653	-0.113158	0.0565341	-0.153509	-0.0234218
319626	9530059O14Rik	NA	-0.708495	0.841097	NA	NA	NA	NA	NA	NA	NA	NA	NA	NA	NA	NA	NA	-2.39938	-2.39382	-2.39679	-2.39696	-2.39529	-2.39522	-2.39423	-2.39376	-2.39636	-2.39629
213673	9530068E07Rik	ENSMUSG00000036275	-0.0857872	0.264546	0.539323	-0.13369	0.0900578	0.199204	-0.178576	0.0322672	0.182983	-0.0871708	0.217438	0.47991	-0.0136234	0.854577	0.928169	12.4929	12.5396	12.602	12.6696	12.9704	12.9673	13.1158	13.3072	12.9712	12.9757
68283	9530077C05Rik	ENSMUSG00000036411	-0.271321	0.448127	0.700537	-0.262576	0.48721	0.626167	0.81655	0.312247	NA	-0.580742	0.729846	NA	-0.0956281	0.918782	NA	3.51339	3.6679	3.23104	3.37203	2.44008	2.27719	2.09042	2.03714	2.21366	2.24138
319247	9530080O11Rik	NA	NA	NA	NA	NA	NA	NA	NA	NA	NA	NA	NA	NA	NA	NA	NA	0	0	0	0	0	0	0	0	0	0
638247	9530082P21Rik	NA	-0.218241	0.018919	0.136032	-0.439168	0.0102314	0.0552529	-0.248427	0.0916776	0.312736	-0.0537277	0.575228	0.792	-0.0542848	0.554433	0.737336	8.75268	8.88837	8.39591	8.65059	8.77176	8.7975	9.03087	9.20421	9.35244	9.38574
320440	9530091C08Rik	NA	-0.708495	0.841097	NA	-0.727633	0.836864	NA	-0.819222	0.816674	NA	-0.675316	0.848446	NA	NA	NA	NA	-2.20245	-2.17823	-2.19119	-2.16693	-2.18463	-2.15937	-2.18001	-2.15299	-2.1893	-2.189
319903	9630013A20Rik	NA	NA	NA	NA	NA	NA	NA	NA	NA	NA	NA	NA	NA	NA	NA	NA	0	0	0	0	0	0	0	0	0	0
319743	9630013D21Rik	NA	-0.00252124	0.994589	0.996579	-0.16714	0.647051	0.758103	-0.62602	0.3147	NA	1.06107	0.377008	NA	0.00496871	0.997508	NA	4.39881	4.301	3.91065	4.00368	2.88015	3.15395	2.52108	2.31683	2.19435	2.20814
381155	9630014M24Rik	NA	-0.497973	0.879151	NA	1.30842	0.549112	NA	-0.841356	0.766798	NA	1.25495	0.61264	NA	-0.395055	0.825223	NA	-1.13471	-1.08312	-0.964779	-1.10841	-1.08665	-1.01086	-0.928452	-1.06428	-0.970732	-0.895248
319562	9630028B13Rik	NA	1.3122	0.277934	NA	-0.872685	0.53333	NA	1.93514	0.549281	NA	1.26599	0.606758	NA	0.0337306	0.984564	NA	0.12336	-0.140382	-0.164874	-0.0190036	-0.134304	-0.418822	-0.255875	-0.323848	-0.15675	-0.182605
320684	9630028H03Rik	NA	NA	NA	NA	NA	NA	NA	NA	NA	NA	NA	NA	NA	NA	NA	NA	0	0	0	0	0	0	0	0	0	0
442798	9630041A04Rik	NA	NA	NA	NA	NA	NA	NA	NA	NA	NA	NA	NA	NA	NA	NA	NA	0	0	0	0	0	0	0	0	0	0
328829	9830107B12Rik	ENSMUSG00000073386 /// ENSMUSG00000115865	1.30122	0.711114	NA	-1.34475	0.701572	NA	0.603737	0.832751	NA	0.68545	0.817971	NA	0.7218	0.795191	NA	-1.52879	-1.64259	-1.61461	-1.50016	-1.48321	-1.54067	-1.47248	-1.52585	-1.49406	-1.55144
329753	9830132P13Rik	NA	2.45944	0.327113	NA	1.22826	0.630417	NA	1.76425	0.541207	NA	0.0243159	0.980694	NA	-1.16921	0.493957	NA	-0.22062	-0.476618	-0.236403	-0.375127	-0.00724389	-0.430093	0.109915	0.284299	-0.227608	-0.0875194
402757	9830166K06Rik	NA	0.734173	0.835418	NA	-2.01008	0.55118	NA	NA	NA	NA	0.767352	0.828094	NA	1.93019	0.544619	NA	-1.90397	-1.94597	-1.92635	-1.80539	-1.91567	-1.91523	-1.86742	-1.90484	-1.80111	-1.92278
268759	9930012K11Rik	ENSMUSG00000044551	-0.408399	0.00741737	0.0815076	0.078616	0.855342	0.908581	0.323815	0.48185	0.722355	-0.0801919	0.837984	0.93336	-0.0716052	0.756357	0.870797	6.32315	6.61274	4.52665	4.47403	4.48329	4.37761	4.69917	4.72514	5.49988	5.53546
320469	9930014A18Rik	NA	0.47331	0.0533948	0.237991	0.690482	0.0128651	0.0628556	0.991404	0.105894	NA	0.238578	0.757948	NA	0.750188	0.198022	NA	4.73973	4.41323	4.65095	4.18216	3.50976	3.1456	3.25365	3.09658	3.49153	3.13118
240613	9930021J03Rik	ENSMUSG00000046138	0.0729476	0.416087	0.675651	0.10681	0.322302	0.472292	-0.0348661	0.704369	0.85733	0.150545	0.129008	0.350771	0.207359	0.042921	0.143364	9.25816	9.20442	9.25991	9.17258	9.41882	9.40841	9.47693	9.42016	9.38383	9.24534
320509	9930022D16Rik	NA	0.242517	0.469459	0.715855	0.0879945	0.75152	0.835879	-0.123811	0.65088	0.826143	0.263017	0.40965	0.676225	0.654148	0.0859527	0.231628	4.7183	4.58679	6.37512	6.2786	5.32149	5.42309	5.20111	5.03038	4.81118	4.47643
319503	9930038B18Rik	NA	1.465	0.678269	NA	NA	NA	NA	0.623446	0.859961	NA	NA	NA	NA	0.602204	0.849542	NA	-2.00694	-2.07217	-2.0567	-2.05765	-2.01616	-2.04793	-2.04234	-2.03973	-1.99005	-2.02177
194268	9930104L06Rik	ENSMUSG00000044730	0.0997474	0.384202	0.649783	0.0381405	0.815814	0.880388	0.266273	0.0766884	0.28806	0.0162319	0.893197	0.959348	0.0111586	0.909424	0.954317	8.58831	8.51033	7.89599	7.85435	8.39244	8.26089	8.53592	8.4934	8.82486	8.81323
667214	9930111J21Rik1	ENSMUSG00000069893	0.142286	0.619977	0.815395	1.13639	0.00223084	0.0242216	0.105777	0.742434	0.878733	-0.438402	0.0539666	0.196997	0.622709	0.0465308	0.151286	5.88389	5.76415	5.44922	4.91639	6.93566	6.68636	7.04874	7.52232	6.69304	6.34201
245240	9930111J21Rik2	ENSMUSG00000069892	0.597311	0.472816	NA	-1.17668	0.236998	NA	-0.246502	0.476276	0.717658	-0.35091	0.463569	0.717645	0.573741	0.50022	NA	2.39744	2.21833	2.10179	2.40917	3.73047	3.90333	3.25889	3.45544	2.50047	2.28718
50518	a	ENSMUSG00000027596 /// ENSMUSG00000084897	0.0128434	0.9971	NA	-0.727633	0.836864	NA	-0.12396	0.943783	NA	0.106381	0.890628	NA	-0.466292	0.526732	NA	0.284878	0.27771	0.261916	0.332054	0.676225	0.514925	1.1508	1.28645	1.11957	1.3313
100126243	A030001D20Rik	NA	-0.0472971	0.9526	NA	-0.361158	0.348906	0.498391	0.556913	0.500353	NA	1.1889	0.527215	NA	2.36667	0.0737601	NA	1.77979	1.80932	2.94054	3.17478	1.80688	1.86579	1.76059	1.37941	1.86005	1.35671
319266	A130010J15Rik	ENSMUSG00000079144	-0.0290732	0.835807	0.928109	-0.0383447	0.828313	0.88989	0.350551	0.154919	0.410467	0.20912	0.270939	0.543913	-0.12761	0.368057	0.580743	7.13877	7.15019	6.40295	6.40965	6.42033	6.05915	6.72329	6.74081	7.31804	7.39519
100502752	A130015J22Rik	NA	-0.946102	0.54688	NA	-0.851634	0.33464	NA	0.0865706	0.966874	NA	1.47958	0.66742	NA	NA	NA	NA	-0.25847	-0.0956028	0.10185	0.374378	-0.245429	-0.309036	-0.290671	-0.452202	-0.479042	-0.478321
319269	A130040M12Rik	NA	0.777216	4.68578e-05	0.00251154	1.19426	1.35151e-06	0.000141519	1.01894	2.17958e-08	4.74254e-06	0.563171	5.33846e-05	0.000905549	0.524406	0.00697844	0.0406165	9.25815	8.84837	10.5271	9.72014	10.5172	9.64598	10.8638	10.6841	10.8753	10.527
320138	A130050O07Rik	NA	-0.00499682	0.98788	0.993416	-0.506753	0.182645	0.318821	-0.418443	0.334925	0.607185	0.0907195	0.913204	NA	1.0402	0.192037	NA	4.35316	4.34972	3.62847	3.90624	3.99629	4.326	3.13331	2.97612	3.1187	2.77029
791370	A130051J06Rik	NA	0.365481	0.403042	0.665792	0.573927	0.0652636	0.161891	-0.617177	0.380597	NA	-0.758719	0.446516	NA	0.680804	0.194261	0.392263	3.81212	3.52391	4.10937	3.73019	2.69235	2.97926	2.59713	2.74641	3.59988	3.16471
319272	A130077B15Rik	NA	0.257006	0.330081	0.602636	0.574507	0.0226492	0.0850102	0.104905	0.765074	0.891245	-0.123528	0.611284	0.814815	0.0397495	0.866888	0.934935	5.25552	5.10561	5.36334	5.00457	5.12826	4.89314	5.40693	5.68212	5.66311	5.62812
117586	A1bg	ENSMUSG00000022347	NA	NA	NA	NA	NA	NA	NA	NA	NA	NA	NA	NA	NA	NA	NA	0	0	0	0	0	0	0	0	0	0
69865	A1cf	ENSMUSG00000052595	NA	NA	NA	0.397818	0.336198	0.485457	-0.111628	0.790068	0.906063	-1.01902	0.276544	NA	-0.7386	0.649072	NA	1.30517	1.30003	3.44523	3.21721	2.82885	3.20122	2.28251	2.31026	1.62393	1.70764
319951	A230001M10Rik	NA	NA	NA	NA	NA	NA	NA	NA	NA	NA	NA	NA	NA	NA	NA	NA	0	0	0	0	0	0	0	0	0	0
27493	A230006K03Rik	NA	NA	NA	NA	-0.727633	0.836864	NA	-0.819222	0.816674	NA	1.49815	0.661763	NA	NA	NA	NA	-2.20536	-2.20623	-2.19267	-2.16536	-2.15714	-2.15684	-2.15194	-2.1778	-2.19055	-2.19021
319750	A230009B12Rik	NA	1.26938	0.597044	NA	0.38826	0.794781	NA	-1.56211	0.658106	NA	NA	NA	NA	NA	NA	NA	-1.30613	-1.45057	-1.17987	-1.26219	-1.46494	-1.34395	-1.45381	-1.44893	-1.47618	-1.47545
100125339	A230020J21Rik	NA	0.0906225	0.9098	NA	0.440677	0.524512	NA	-1.4043	0.355037	NA	0.781974	0.77157	NA	0.756456	0.507887	NA	1.28381	1.28169	1.69044	1.48847	0.854046	1.06623	0.77842	0.71847	1.16449	0.964444
319487	A230028O05Rik	NA	0.198997	0.225831	0.501742	0.473763	0.0153136	0.0691072	0.321108	0.0245989	0.159181	-0.139401	0.336622	0.611328	0.0934288	0.532714	0.720063	8.03508	7.88738	8.21439	7.88478	8.44236	8.11295	8.61708	8.83534	8.01449	7.95119
624086	A230045G11Rik	NA	-0.164191	0.173653	0.43852	-0.205461	0.244615	0.389392	0.169321	0.566363	0.774428	-0.202096	0.415745	0.680843	-0.0195463	0.905919	0.952983	7.40052	7.50893	6.53466	6.64798	5.9532	5.81186	6.19469	6.35639	7.02772	7.04001
319278	A230050P20Rik	ENSMUSG00000038884	-0.16501	0.181597	0.447927	0.0538803	0.714684	0.809927	-0.192182	0.251944	0.525843	-0.362033	0.00105222	0.0102052	-0.162007	0.128244	0.301126	8.31972	8.41269	8.21884	8.16955	9.05116	9.10556	9.16476	9.48937	8.58139	8.68262
320593	A230051N06Rik	ENSMUSG00000117172	-1.24885	0.722196	NA	NA	NA	NA	0.623446	0.859961	NA	NA	NA	NA	NA	NA	NA	-2.26541	-2.23219	-2.25781	-2.25831	-2.23651	-2.2532	-2.25026	-2.24889	-2.25653	-2.25633
442796	A230052G05Rik	NA	-0.708495	0.841097	NA	-1.28857	0.713768	NA	NA	NA	NA	NA	NA	NA	0.706689	0.841496	NA	-2.20037	-2.17834	-2.19013	-2.14532	-2.18416	-2.18392	-2.17996	-2.17811	-2.16567	-2.18813
319469	A230056J06Rik	NA	-0.595658	0.731278	NA	-1.48056	0.674848	NA	NA	NA	NA	-1.23679	0.722357	NA	-0.1409	0.950709	NA	-1.33967	-1.24446	-1.47495	-1.35752	-1.45932	-1.45868	-1.44831	-1.32428	-1.35126	-1.35054
320845	A230056P14Rik	NA	0.17515	0.579079	0.78804	0.3352	0.292564	0.44149	-0.178174	0.658075	0.829913	-0.328651	0.427325	0.689802	0.318291	0.401971	0.612389	4.50913	4.38554	4.41405	4.20339	4.23894	4.32857	4.12061	4.33638	4.33088	4.15231
319893	A230057D06Rik	NA	NA	NA	NA	NA	NA	NA	NA	NA	NA	NA	NA	NA	NA	NA	NA	0	0	0	0	0	0	0	0	0	0
100043072	A230070E04Rik	NA	NA	NA	NA	NA	NA	NA	NA	NA	NA	NA	NA	NA	NA	NA	NA	0	0	0	0	0	0	0	0	0	0
320742	A230072C01Rik	NA	0.0371517	0.873656	0.944515	-0.227443	0.459925	0.601549	-0.60822	0.141073	0.388733	0.296423	0.302388	0.577449	-0.284824	0.222373	0.42562	5.55233	5.53498	4.77736	4.88339	4.60416	4.65535	5.07867	5.15101	5.32996	5.51049
331547	A230072E10Rik	NA	-1.004	0.692636	NA	1.08446	0.393772	NA	-0.888883	0.71429	NA	0.0460239	0.989272	NA	-0.00985754	0.997773	NA	-0.989918	-0.879286	-0.535138	-0.764237	-0.878935	-0.806548	-0.929482	-0.923129	-0.962708	-0.960959
619290	A230072I06Rik	NA	NA	NA	NA	NA	NA	NA	NA	NA	NA	NA	NA	NA	NA	NA	NA	0	0	0	0	0	0	0	0	0	0
320210	A230077H06Rik	NA	NA	NA	NA	NA	NA	NA	-0.819222	0.816674	NA	NA	NA	NA	NA	NA	NA	-2.40073	-2.40097	-2.39716	-2.3974	-2.39509	-2.3871	-2.39363	-2.39299	-2.39657	-2.39647
442825	A230083G16Rik	NA	0.106639	0.740293	0.878545	0.190379	0.600694	0.720439	-0.226826	0.395765	0.656923	-0.698037	0.201299	0.461689	-0.012048	0.978675	0.989958	4.43129	4.36735	4.28552	4.15632	4.57598	4.96245	3.87879	3.9706	3.91323	3.93484
100503323	A230087F16Rik	NA	0.547429	0.862157	NA	-1.03064	0.678076	NA	0.654723	0.816844	NA	0.0460233	0.989423	NA	1.27191	0.7172	NA	-1.46729	-1.52259	-1.49349	-1.37779	-1.47809	-1.47746	-1.40852	-1.46247	-1.43034	-1.54707
97209	A230098N10Rik	NA	-2.30893	0.424162	NA	-1.29589	0.712184	NA	-0.456897	0.842937	NA	-2.75244	0.0869186	NA	-0.0202956	0.993512	NA	-1.05384	-0.817153	-1.03475	-0.888005	-0.874958	-0.793663	-0.920972	-0.357267	-0.89406	-0.876672
320466	A230103J11Rik	NA	0.379635	0.339283	0.611559	0.725783	0.294554	NA	0.164922	0.754949	NA	0.00583423	0.989274	0.996997	0.309532	0.434504	0.640573	3.66076	3.43489	3.05322	2.78301	3.49255	3.37781	3.90258	3.92961	3.9912	3.80705
320919	A230107N01Rik	NA	-0.398108	0.394895	0.658544	1.38577	0.171523	NA	-0.417416	0.528554	NA	0.906755	0.220529	NA	0.733135	0.21837	NA	2.89035	3.0769	2.2592	1.91255	2.63842	2.66732	2.6658	2.42193	2.87575	2.5385
320132	A230108P19Rik	NA	0.0241848	0.994537	NA	0.715035	0.83965	NA	-0.0978839	0.977902	NA	NA	NA	NA	1.30261	0.710669	NA	-1.97114	-1.97228	-1.95462	-1.99238	-1.945	-1.9446	-1.97489	-1.97192	-1.91517	-1.98808
232345	A2m	ENSMUSG00000030111	NA	NA	NA	NA	NA	NA	0.623446	0.859961	NA	NA	NA	NA	NA	NA	NA	-2.40028	-2.4005	-2.39704	-2.39725	-2.39516	-2.39508	-2.38664	-2.39324	-2.3965	-2.39641
232400	A2ml1	ENSMUSG00000047228	NA	NA	NA	0.715035	0.83965	NA	NA	NA	NA	NA	NA	NA	NA	NA	NA	-2.40032	-2.40055	-2.38979	-2.39727	-2.39515	-2.39507	-2.39381	-2.39322	-2.39651	-2.39642
234624	A330008L17Rik	NA	NA	NA	NA	NA	NA	NA	NA	NA	NA	NA	NA	NA	NA	NA	NA	0	0	0	0	0	0	0	0	0	0
380977	A330009N23Rik	NA	-1.30421	0.479845	NA	-0.776452	0.611249	NA	-0.0899703	0.96922	NA	0.420504	0.854828	NA	0.803312	0.746695	NA	-0.761925	-0.602159	-0.652338	-0.538833	-0.778041	-0.704649	-0.541686	-0.693228	-0.664697	-0.793159
442840	A330017A19Rik	NA	-0.498928	0.287471	0.562846	0.561007	0.595335	NA	-0.638267	0.748717	NA	0.0406839	0.971931	NA	1.47947	0.230498	NA	2.172	2.44616	1.5961	1.40585	1.0393	1.11368	1.42951	1.44979	1.56094	1.19576
320977	A330023F24Rik	NA	0.49499	0.0173708	0.130726	0.634766	0.000963114	0.0153166	0.441204	0.121562	0.359784	-0.157203	0.373307	0.644613	-0.229875	0.26958	0.479478	7.38579	7.02143	7.34862	6.90111	6.58483	6.19787	6.96774	7.22778	6.80542	6.9378
319931	A330032B11Rik	NA	-0.0785599	0.950277	NA	-1.01982	0.682154	NA	-1.67901	0.12754	NA	-0.720577	0.588349	NA	-1.14862	0.539234	NA	0.493596	0.469444	0.168809	0.292366	0.757282	1.18357	0.359499	0.685426	0.238407	0.395427
320614	A330033J07Rik	NA	NA	NA	NA	NA	NA	NA	NA	NA	NA	NA	NA	NA	NA	NA	NA	0	0	0	0	0	0	0	0	0	0
319727	A330035P11Rik	NA	0.313061	0.583738	0.792078	0.127687	0.885701	NA	1.00297	0.365292	NA	0.292988	0.761192	NA	0.232702	0.76984	NA	2.46466	2.27264	1.8194	1.76686	1.86359	1.56896	1.89223	1.79638	1.99686	1.88502
74333	A330040F15Rik	NA	0.457784	0.314464	0.588373	0.542827	0.410243	NA	0.614134	0.39189	NA	-0.0643126	0.895373	0.959999	0.653543	0.235511	0.439478	3.39461	3.1459	2.9818	2.72578	3.11016	2.82903	3.40182	3.51008	3.30462	2.98845
319556	A330041J22Rik	NA	1.28479	0.714501	NA	NA	NA	NA	0.623446	0.859961	NA	0.767352	0.828094	NA	0.366999	0.793428	NA	-1.48625	-1.59343	-1.56485	-1.5666	-1.48995	-1.54865	-1.47898	-1.5335	-1.20846	-1.3223
320315	A330048O09Rik	NA	-0.708495	0.841097	NA	NA	NA	NA	NA	NA	NA	NA	NA	NA	NA	NA	NA	-2.39915	-2.39394	-2.39673	-2.39689	-2.39532	-2.39526	-2.39432	-2.39389	-2.39632	-2.39626
327768	A330049N07Rik	NA	NA	NA	NA	NA	NA	NA	NA	NA	NA	0.767352	0.828094	NA	1.29317	0.610879	NA	-2.13904	-2.14001	-2.12504	-2.12595	-2.11688	-2.11655	-2.08004	-2.10861	-2.02942	-2.09122
606735	A330069E16Rik	NA	-0.377702	0.164294	0.425142	-0.551154	0.0981229	0.210789	-0.358827	0.42679	0.682611	-0.130207	0.801257	0.916757	-0.307175	0.414166	0.622842	4.48664	4.72305	4.31276	4.65166	3.8161	4.10713	4.11993	4.11303	4.20195	4.38424
381673	A330070K13Rik	ENSMUSG00000052014	NA	NA	NA	NA	NA	NA	NA	NA	NA	NA	NA	NA	NA	NA	NA	0	0	0	0	0	0	0	0	0	0
100503592	A330076C08Rik	NA	-0.708495	0.841097	NA	0.0086941	0.998035	NA	NA	NA	NA	-0.675316	0.848446	NA	-0.792088	0.771643	NA	-2.00973	-1.97268	-1.95426	-1.95539	-1.98247	-1.98206	-1.9754	-1.93406	-1.95137	-1.91267
320026	A330076H08Rik	NA	NA	NA	NA	NA	NA	NA	NA	NA	NA	NA	NA	NA	NA	NA	NA	0	0	0	0	0	0	0	0	0	0
107003	A330093E20Rik	NA	-1.27044	0.717505	NA	1.91602	0.576779	NA	1.2173	0.640145	NA	2.34179	0.329791	NA	0.706689	0.841496	NA	-1.57805	-1.46066	-1.37342	-1.55273	-1.3547	-1.47437	-1.28342	-1.51917	-1.48625	-1.54568
77920	A330102I10Rik	NA	0.734173	0.835418	NA	-0.727633	0.836864	NA	NA	NA	NA	NA	NA	NA	NA	NA	NA	-2.32048	-2.33233	-2.32679	-2.31565	-2.32378	-2.32366	-2.32166	-2.32073	-2.32593	-2.32579
215493	A3galt2	ENSMUSG00000028794	0.01658	0.986346	NA	0.207576	0.677336	0.781216	-0.526914	0.524205	NA	0.146388	0.837366	NA	0.539338	0.525687	NA	2.06743	2.07053	3.22116	3.04742	2.2326	2.27902	2.47225	2.51597	2.25422	2.06805
97159	A430005L14Rik	ENSMUSG00000047613	-0.291714	0.0737695	0.282087	-0.470829	0.0235269	0.087092	-0.024249	0.892761	0.953818	0.138165	0.271192	0.544172	-0.0782403	0.609153	0.777508	8.8668	9.03936	8.65796	8.9301	8.37391	8.35782	8.36185	8.3081	8.58054	8.6389
319665	A430010J10Rik	NA	-0.507942	0.800049	NA	-1.32772	0.446093	NA	-0.0880435	0.98011	NA	-0.675316	0.848446	NA	-0.735979	0.83502	NA	-1.34704	-1.29249	-1.31597	-1.14273	-1.36124	-1.36058	-1.41126	-1.34492	-1.43406	-1.37196
243308	A430033K04Rik	ENSMUSG00000056014	-0.103715	0.63855	0.825681	-0.0511892	0.904113	0.941528	0.26193	0.50275	0.737386	-0.0453319	0.895442	0.959999	0.210801	0.490882	0.688961	5.5274	5.58465	4.24503	4.24302	4.62697	4.37916	4.67219	4.79816	5.33448	5.20149
320312	A430035B10Rik	NA	0.382954	0.101439	0.334261	0.312629	0.267953	0.414319	-0.210234	0.616392	0.807606	-0.0972638	0.831762	0.930867	0.549938	0.352272	0.565147	4.95481	4.6939	4.7147	4.49347	4.41179	4.39043	3.9431	4.14689	3.8533	3.565
319486	A430057M04Rik	NA	0.214809	0.423288	0.681503	-0.756274	0.0261493	0.092661	0.585565	0.313467	NA	0.0170761	0.966361	0.988398	-0.24837	0.504712	0.69925	4.75228	4.61385	4.08047	4.50682	3.83303	3.65336	4.39851	4.36529	4.48521	4.60832
100039739	A430060F13Rik	NA	0.0128434	0.9971	NA	NA	NA	NA	NA	NA	NA	NA	NA	NA	NA	NA	NA	-2.32081	-2.32113	-2.32647	-2.32677	-2.32377	-2.32366	-2.32187	-2.32103	-2.32569	-2.32557
414110	A430072P03Rik	NA	-0.50799	0.799914	NA	-0.296154	0.695377	NA	0.573226	0.0589341	0.252825	0.420998	0.0212481	0.102474	0.104827	0.66898	0.816423	2.73987	2.76885	3.26482	3.32899	5.40119	4.71972	6.09437	6.08512	5.25304	5.16771
319493	A430078G23Rik	ENSMUSG00000074497	1.09207	0.153796	NA	1.14934	0.246301	NA	-0.111469	0.974824	NA	NA	NA	NA	-0.01464	0.996694	NA	1.03026	0.500617	0.71688	0.316465	-0.0325971	-0.0269145	-0.0901426	-0.0840686	-0.0443274	-0.0428979
106059	A430088P11Rik	NA	0.339814	0.509904	0.743066	0.850254	0.37568	NA	NA	NA	NA	1.13138	0.477445	NA	1.50671	0.0739903	NA	2.32417	2.11364	1.76413	1.52339	0.972421	0.901829	1.23954	1.1903	1.93968	1.35537
331195	A430089I19Rik	ENSMUSG00000094560	NA	NA	NA	NA	NA	NA	NA	NA	NA	NA	NA	NA	NA	NA	NA	0	0	0	0	0	0	0	0	0	0
319803	A430090L17Rik	NA	0.503638	0.358414	0.628598	0.225786	0.600393	0.720439	-1.0233	0.149985	NA	0.0469781	0.939002	NA	-0.163281	0.846353	NA	3.02365	2.77114	3.25597	3.10217	2.52379	2.86391	2.86547	2.95928	2.39893	2.44225
403202	A430093F15Rik	NA	-0.614546	0.234971	NA	-0.231044	0.381272	0.528791	-0.0255403	0.929172	0.969625	0.161116	0.411347	0.678025	-0.811995	0.0107394	0.0551461	3.95668	4.17676	5.27456	5.41337	5.99368	5.79385	6.08388	6.22718	5.10803	5.57793
319650	A430108G06Rik	NA	0.174662	0.632803	0.822268	-0.528617	0.296944	0.445921	1.68857	0.435404	NA	-0.140543	0.855017	NA	-0.220285	0.762555	NA	3.50965	3.38934	2.92979	3.22177	2.04871	1.81492	2.46635	2.59116	2.50433	2.56557
329307	A430110L20Rik	NA	0.212047	0.328331	0.601197	1.06339	0.0457494	NA	0.280667	0.568008	0.775222	-0.178239	0.567846	0.786238	-0.00251793	0.992773	0.996013	5.3057	5.15659	4.11381	3.6461	4.26547	3.96545	4.82997	5.13409	4.92686	4.92968
239559	A4galt	ENSMUSG00000047878	-0.753631	0.641125	NA	1.94132	0.323395	NA	0.204946	0.837248	NA	-0.928617	0.169561	NA	-0.861788	0.4129	NA	0.709258	0.806643	0.882202	0.643515	1.2198	1.17072	1.57393	2.07441	1.02584	1.2521
333424	A4gnt	ENSMUSG00000037953	NA	NA	NA	0.715035	0.83965	NA	-0.819222	0.816674	NA	NA	NA	NA	NA	NA	NA	-2.33355	-2.33398	-2.31371	-2.32779	-2.3238	-2.30997	-2.32127	-2.32016	-2.32636	-2.32619
381384	A530006G24Rik	NA	NA	NA	NA	NA	NA	NA	NA	NA	NA	NA	NA	NA	NA	NA	NA	0	0	0	0	0	0	0	0	0	0
382036	A530010L16Rik	NA	0.601236	0.127331	0.374418	0.0500241	0.967437	NA	0.345756	0.847924	NA	-0.62431	0.834757	NA	1.41225	0.422253	NA	2.65632	2.26779	1.00665	0.976566	0.997136	0.855414	0.668502	0.821334	1.02707	0.872521
329562	A530013C23Rik	NA	-1.09046	0.028605	0.169873	-0.366883	0.421922	0.566722	-0.110791	0.828412	0.926328	-0.209164	0.606152	0.812113	0.142158	0.681291	0.824028	3.23474	3.79805	3.79346	3.95	3.77665	3.9083	4.11875	4.19297	4.21286	4.13069
319942	A530016L24Rik	ENSMUSG00000043122	NA	NA	NA	NA	NA	NA	NA	NA	NA	NA	NA	NA	NA	NA	NA	0	0	0	0	0	0	0	0	0	0
319839	A530020G20Rik	NA	NA	NA	NA	NA	NA	NA	NA	NA	NA	NA	NA	NA	NA	NA	NA	0	0	0	0	0	0	0	0	0	0
330578	A530021J07Rik	NA	-1.93151	0.3123	NA	-1.38083	0.589323	NA	-0.632756	0.819993	NA	1.33202	0.704631	NA	NA	NA	NA	-1.4421	-1.18796	-1.4123	-1.29279	-1.39635	-1.33489	-1.32431	-1.44098	-1.46851	-1.46778
381287	A530032D15Rik	ENSMUSG00000089844	-0.266686	0.561813	0.774915	-0.656596	0.18026	0.316062	-0.760313	0.0051946	0.0647201	-0.762642	2.16564e-07	8.56368e-06	-0.902008	5.34245e-09	3.9805e-07	4.93162	5.01637	5.1274	5.37257	7.48235	7.81541	7.66932	8.46769	6.9813	7.61038
621875	A530040E14Rik	NA	-0.365599	0.313742	0.587981	-0.0934157	0.735048	0.824475	-0.579029	0.0074959	0.0802615	-0.575468	4.9558e-05	0.00085599	-0.34874	0.0625008	0.187457	5.78728	5.96681	6.0948	6.12514	8.22123	8.53844	8.2125	8.7779	7.65465	7.91785
328190	A530046M15Rik	NA	NA	NA	NA	NA	NA	NA	0.623446	0.859961	NA	-0.286119	0.770982	NA	-0.0011997	0.999131	NA	-0.556841	-0.558804	-0.528719	-0.530572	-0.171396	-0.511624	-0.091697	0.34657	0.0408938	0.0184051
442846	A530050N04Rik	NA	NA	NA	NA	-1.48056	0.674848	NA	-0.819222	0.816674	NA	NA	NA	NA	NA	NA	NA	-2.26771	-2.26833	-2.25885	-2.22008	-2.25369	-2.2338	-2.25005	-2.24845	-2.25736	-2.25712
208079	A530053G22Rik	NA	NA	NA	NA	NA	NA	NA	NA	NA	NA	NA	NA	NA	NA	NA	NA	0	0	0	0	0	0	0	0	0	0
320846	A530058N18Rik	NA	NA	NA	NA	NA	NA	NA	NA	NA	NA	NA	NA	NA	NA	NA	NA	0	0	0	0	0	0	0	0	0	0
328830	A530064D06Rik	ENSMUSG00000043939 /// ENSMUSG00000116468	-0.322503	0.0990138	0.330603	-0.401215	0.116018	0.236059	-0.59534	0.0116715	0.104495	-0.0797241	0.655071	0.843181	0.0542148	0.737244	0.858783	6.7566	6.95531	6.34033	6.56444	6.45634	6.41322	7.05406	7.5028	7.70511	7.65563
328263	A530065N20Rik	NA	-0.547545	0.802424	NA	NA	NA	NA	-0.819222	0.816674	NA	NA	NA	NA	0.735514	0.788784	NA	-1.79456	-1.75405	-1.85935	-1.86058	-1.84838	-1.80612	-1.84065	-1.83726	-1.77257	-1.81387
100415915	A530072M11Rik	NA	0.0859966	0.789651	0.906704	-0.0913656	0.853638	NA	-0.229977	0.560337	0.771984	-0.652225	0.169301	0.41608	-0.000723565	0.998827	0.999311	4.00339	3.94891	3.34187	3.36883	3.96739	4.20378	3.69885	3.95902	3.6098	3.59328
320367	A530076I17Rik	NA	1.30813	0.473379	NA	-2.45681	0.105663	NA	0.737965	0.603382	NA	1.05676	0.372952	NA	0.350962	0.845418	NA	0.159435	-0.00844226	0.0283192	0.487759	0.426869	0.205319	0.515594	0.318719	0.179645	0.103907
319977	A530079E22Rik	NA	1.64387	0.592959	NA	2.05375	0.295141	NA	-0.0978839	0.977902	NA	NA	NA	NA	-1.99765	0.462431	NA	-1.41228	-1.58044	-1.2673	-1.49686	-1.48007	-1.47945	-1.52698	-1.52231	-1.54837	-1.37501
331045	A530083I20Rik	NA	0.269595	0.814489	NA	-0.444823	0.78044	NA	0.975805	0.677675	NA	0.767352	0.828094	NA	1.11993	0.357512	NA	0.0232583	-0.0450856	-0.196887	-0.144486	-0.264736	-0.315745	-0.17183	-0.375536	0.201721	-0.0560086
664702	A530088E08Rik	NA	-0.0236123	0.925832	0.967333	-1.74912	0.0544468	NA	-0.183272	0.730969	NA	-0.296485	0.44198	0.700709	-0.307663	0.342303	0.55482	4.78097	4.80761	2.8042	3.20966	3.79313	3.73318	4.16163	4.46889	4.56085	4.7721
210373	A530095I07Rik	NA	NA	NA	NA	0.513238	0.787125	NA	1.49377	0.227259	NA	0.570007	0.777316	NA	-1.06097	0.578452	NA	-0.755781	-0.757351	-0.512473	-0.588294	-0.0155226	-0.418298	-0.466402	-0.536576	-0.579478	-0.434456
319997	A630001G21Rik	ENSMUSG00000052760	-0.00882299	0.929318	0.968745	-0.0401522	0.702404	0.800854	-0.236185	0.127611	0.369696	-0.347934	2.34454e-05	0.000457669	-0.194314	0.0172137	0.0764421	10.7845	10.781	10.8059	10.8148	11.554	11.5929	11.7406	12.0997	11.2773	11.4025
414091	A630001O12Rik	NA	-0.249903	0.462902	0.712066	-0.501412	0.156259	0.286878	-0.26107	0.648804	NA	-0.265572	0.70508	NA	0.634985	0.403304	NA	3.67382	3.82197	3.92357	4.23053	3.35684	3.51828	3.01071	3.14452	3.14083	2.84047
320406	A630009H07Rik	NA	1.29593	0.712087	NA	0.715035	0.83965	NA	NA	NA	NA	NA	NA	NA	NA	NA	NA	-2.23294	-2.26501	-2.24161	-2.25787	-2.25327	-2.25309	-2.25035	-2.24906	-2.25621	-2.25602
545280	A630010A05Rik	NA	0.734173	0.835418	NA	NA	NA	NA	NA	NA	NA	NA	NA	NA	NA	NA	NA	-2.39355	-2.3997	-2.39683	-2.39701	-2.39527	-2.3952	-2.39416	-2.39368	-2.39638	-2.39631
100504594	A630012P03Rik	NA	-0.827367	0.744594	NA	-0.727633	0.836864	NA	-0.801523	0.49998	NA	-0.67047	0.0319673	0.13833	-0.332366	0.41373	0.622633	1.45542	1.55193	1.48633	1.54026	2.44287	2.10329	3.46421	4.59059	3.32581	3.5743
399633	A630014C17Rik	NA	NA	NA	NA	0.715035	0.83965	NA	-0.819222	0.816674	NA	NA	NA	NA	NA	NA	NA	-2.33362	-2.33405	-2.31364	-2.32782	-2.3238	-2.30987	-2.32125	-2.32014	-2.32638	-2.32621
408254	A630019I02Rik	NA	NA	NA	NA	NA	NA	NA	NA	NA	NA	NA	NA	NA	NA	NA	NA	0	0	0	0	0	0	0	0	0	0
105518	A630023A22Rik	ENSMUSG00000095493	NA	NA	NA	NA	NA	NA	NA	NA	NA	NA	NA	NA	NA	NA	NA	0	0	0	0	0	0	0	0	0	0
231603	A630023P12Rik	NA	NA	NA	NA	0.715035	0.83965	NA	NA	NA	NA	NA	NA	NA	NA	NA	NA	-2.40007	-2.40028	-2.39014	-2.39718	-2.39519	-2.39511	-2.39392	-2.39337	-2.39647	-2.39638
320642	A630066F11Rik	NA	-0.358826	0.109642	0.348456	-0.466377	0.110016	0.227034	-0.374812	0.316687	0.591003	0.472495	0.248475	0.51942	-0.214185	0.452487	0.655754	5.32685	5.5466	4.77771	5.03949	4.49634	4.63202	4.63314	4.45621	4.86171	4.99138
100038467	A630072L19Rik	NA	NA	NA	NA	NA	NA	NA	NA	NA	NA	NA	NA	NA	NA	NA	NA	0	0	0	0	0	0	0	0	0	0
320770	A630072M18Rik	NA	-0.0139977	0.910249	0.960776	0.00939975	0.945627	0.966992	-0.270432	0.0645982	0.264049	-0.311214	0.0488754	0.184119	0.0690241	0.673129	0.819361	7.78325	7.78669	8.01428	7.99416	8.68982	9.07019	8.37447	8.3986	7.52549	7.48081
381819	A630073D07Rik	ENSMUSG00000067541	NA	NA	NA	NA	NA	NA	NA	NA	NA	NA	NA	NA	NA	NA	NA	0	0	0	0	0	0	0	0	0	0
100043910	A630075F10Rik	NA	0.734173	0.835418	NA	-0.727633	0.836864	NA	-0.750602	0.818457	NA	NA	NA	NA	NA	NA	NA	-2.10792	-2.13854	-2.12423	-2.09542	-2.11645	-2.05675	-2.08127	-2.10855	-2.12199	-2.12163
319929	A630076J17Rik	ENSMUSG00000094613	-0.708495	0.841097	NA	NA	NA	NA	NA	NA	NA	NA	NA	NA	NA	NA	NA	-2.39922	-2.3939	-2.39675	-2.39691	-2.39531	-2.39525	-2.39429	-2.39385	-2.39633	-2.39627
319973	A630077J23Rik	NA	-0.181347	0.942896	NA	-0.727633	0.836864	NA	NA	NA	NA	NA	NA	NA	NA	NA	NA	-2.08248	-2.08328	-2.12175	-2.09716	-2.11511	-2.11483	-2.11042	-2.10836	-2.11984	-2.11953
320586	A630089N07Rik	NA	0.394785	0.199244	0.470315	0.395524	0.349823	0.49922	0.169375	0.664404	0.834012	-0.113288	0.774025	0.90458	0.387204	0.315309	0.527161	4.625	4.35837	4.25553	4.05113	4.29647	4.19083	4.27195	4.34503	4.38426	4.12739
233544	A630091E08Rik	NA	-0.708495	0.841097	NA	1.19775	0.400493	NA	-0.0880435	0.98011	NA	-0.675316	0.848446	NA	NA	NA	NA	-1.58527	-1.53025	-1.16712	-1.38734	-1.48617	-1.48555	-1.53333	-1.47078	-1.55484	-1.55414
235973	A630095E13Rik	ENSMUSG00000070313	NA	NA	NA	NA	NA	NA	NA	NA	NA	NA	NA	NA	NA	NA	NA	0	0	0	0	0	0	0	0	0	0
381272	A630095N17Rik	ENSMUSG00000096094	NA	NA	NA	-0.727633	0.836864	NA	-0.819222	0.816674	NA	NA	NA	NA	-0.735979	0.83502	NA	-2.26743	-2.26803	-2.25872	-2.23996	-2.25365	-2.23411	-2.25008	-2.24851	-2.25726	-2.2377
402727	A730009L09Rik	NA	NA	NA	NA	NA	NA	NA	NA	NA	NA	NA	NA	NA	NA	NA	NA	0	0	0	0	0	0	0	0	0	0
319916	A730011C13Rik	NA	-0.16861	0.520424	0.749551	0.525928	0.0474483	0.132859	-0.0654176	0.805243	0.913926	-0.11689	0.636426	0.830867	-0.274692	0.151116	0.334037	5.30755	5.38274	5.47696	5.15104	5.49612	5.44441	5.76597	5.96501	5.86973	6.05058
320952	A730013G03Rik	ENSMUSG00000047384	NA	NA	NA	0.715035	0.83965	NA	NA	NA	NA	NA	NA	NA	NA	NA	NA	-2.40007	-2.40028	-2.39014	-2.39718	-2.39519	-2.39511	-2.39392	-2.39337	-2.39647	-2.39638
613258	A730017L22Rik	NA	0.0138729	0.922526	0.965707	0.0236571	0.896522	0.936785	0.046874	0.846371	0.934346	0.0897475	0.688107	0.861533	-0.18171	0.355554	0.568505	6.95532	6.9359	6.69328	6.64751	6.08947	5.94059	6.21264	6.28298	6.54137	6.65872
100504733	A730018C14Rik	NA	NA	NA	NA	NA	NA	NA	NA	NA	NA	NA	NA	NA	NA	NA	NA	0	0	0	0	0	0	0	0	0	0
100504262	A730020E08Rik	NA	NA	NA	NA	NA	NA	NA	-0.841011	0.763932	NA	0.839044	0.592223	NA	1.19202	0.360578	NA	-1.02888	-1.03025	-1.00899	-1.01026	-0.907647	-0.829679	-0.580251	-0.67593	-0.400119	-0.701801
100503044	A730020M07Rik	NA	0.93757	0.518676	NA	-1.2904	0.436804	NA	2.37955	0.347419	NA	2.00593	0.499163	NA	-0.735979	0.83502	NA	-0.533644	-0.721533	-0.709642	-0.518329	-0.697092	-0.915228	-0.599982	-0.894532	-0.925812	-0.847039
329513	A730036I17Rik	NA	0.734173	0.835418	NA	-0.727633	0.836864	NA	0.623446	0.859961	NA	NA	NA	NA	NA	NA	NA	-2.24842	-2.26649	-2.25805	-2.24105	-2.23594	-2.25326	-2.25022	-2.24879	-2.25673	-2.25651
330958	A730043L09Rik	NA	NA	NA	NA	NA	NA	NA	NA	NA	NA	NA	NA	NA	NA	NA	NA	0	0	0	0	0	0	0	0	0	0
208924	A730045E13Rik	NA	NA	NA	NA	NA	NA	NA	NA	NA	NA	NA	NA	NA	NA	NA	NA	0	0	0	0	0	0	0	0	0	0
319764	A730046J19Rik	ENSMUSG00000085139	0.734173	0.835418	NA	0.638085	0.81487	NA	NA	NA	NA	NA	NA	NA	NA	NA	NA	-2.17765	-2.20082	-2.14506	-2.1682	-2.1841	-2.18386	-2.17995	-2.17813	-2.1883	-2.18803
74516	A730049H05Rik	NA	NA	NA	NA	NA	NA	NA	NA	NA	NA	NA	NA	NA	NA	NA	NA	0	0	0	0	0	0	0	0	0	0
319783	A730056A06Rik	NA	NA	NA	NA	NA	NA	NA	NA	NA	NA	NA	NA	NA	NA	NA	NA	0	0	0	0	0	0	0	0	0	0
100504703	A730063M14Rik	NA	-0.412906	0.0191422	0.136476	-1.11461	5.25667e-05	0.00230324	-0.319085	0.352066	0.622449	0.152224	0.622621	0.822007	-0.362781	0.165308	0.354731	5.98488	6.26502	5.13017	5.78062	5.2741	5.41959	5.28296	5.21462	5.34029	5.56375
101786	A730082K24Rik	NA	0.734173	0.835418	NA	NA	NA	NA	NA	NA	NA	NA	NA	NA	NA	NA	NA	-2.39384	-2.39921	-2.3967	-2.39685	-2.39533	-2.39528	-2.39437	-2.39395	-2.39631	-2.39624
100504650	A730085E03Rik	NA	NA	NA	NA	NA	NA	NA	NA	NA	NA	NA	NA	NA	NA	NA	NA	0	0	0	0	0	0	0	0	0	0
654800	A730085K08Rik	NA	-0.0874584	0.924842	NA	-0.0399158	0.988799	NA	0.866552	0.613155	NA	0.339287	0.824587	NA	0.895251	0.554206	NA	0.493236	0.525335	0.200093	0.196557	0.42871	0.226538	0.299249	0.320526	0.424592	0.313982
320411	A730089K16Rik	NA	1.1652	0.56752	NA	0.638143	0.814514	NA	-0.852939	0.760758	NA	-1.24849	0.722323	NA	NA	NA	NA	-1.37453	-1.48611	-1.45095	-1.51028	-1.49346	-1.43521	-1.54044	-1.4205	-1.56186	-1.56116
319798	A730090N16Rik	NA	0.127486	0.840973	NA	-0.0262832	0.972714	NA	-0.0068922	0.98981	0.996256	-0.211354	0.598619	0.807482	0.468721	0.39952	0.610004	2.72531	2.66871	2.81153	2.82292	3.55855	3.39508	3.65865	3.88074	3.18105	2.9598
442803	A830005F24Rik	ENSMUSG00000053181	0.511941	0.630989	NA	-1.84396	0.227408	NA	-0.914997	0.714223	NA	0.0460225	0.989609	NA	-0.347666	0.697943	NA	0.438264	0.298079	0.0747279	0.373246	-0.0434011	0.165333	0.117746	0.051325	0.630354	0.74658
320297	A830009L08Rik	NA	0.641487	0.76581	NA	0.802385	0.74021	NA	NA	NA	NA	NA	NA	NA	-0.735979	0.83502	NA	-1.68625	-1.72971	-1.66474	-1.75374	-1.78479	-1.78432	-1.77668	-1.77312	-1.79298	-1.7486
231570	A830010M20Rik	ENSMUSG00000111375	0.242906	0.232053	0.507711	0.384531	0.0657757	0.16248	0.555167	0.0166194	0.127845	0.199005	0.379654	0.650458	0.313266	0.154714	0.339745	6.59856	6.41197	6.56927	6.29504	6.41639	6.17039	6.32834	6.10654	6.34233	6.14637
320492	A830018L16Rik	ENSMUSG00000057715	NA	NA	NA	0.715035	0.83965	NA	NA	NA	NA	NA	NA	NA	NA	NA	NA	-2.40032	-2.40055	-2.38979	-2.39727	-2.39515	-2.39507	-2.39381	-2.39322	-2.39651	-2.39642
320072	A830019L24Rik	NA	NA	NA	NA	NA	NA	NA	0.623446	0.859961	NA	NA	NA	NA	NA	NA	NA	-2.39996	-2.40017	-2.39695	-2.39715	-2.38853	-2.39513	-2.39397	-2.39343	-2.39645	-2.39637
320566	A830029E22Rik	NA	NA	NA	NA	NA	NA	NA	NA	NA	NA	NA	NA	NA	NA	NA	NA	0	0	0	0	0	0	0	0	0	0
268391	A830031A19Rik	NA	NA	NA	NA	NA	NA	NA	NA	NA	NA	NA	NA	NA	NA	NA	NA	0	0	0	0	0	0	0	0	0	0
442842	A830035A12Rik	NA	-2.31132	0.193848	NA	-1.43117	0.685294	NA	-1.47502	0.564663	NA	0.261375	0.899987	NA	-0.79251	0.773168	NA	-1.14733	-0.850805	-1.18769	-1.04999	-1.09676	-0.959279	-0.938014	-1.00357	-1.11108	-1.03711
268723	A830039N20Rik	NA	NA	NA	NA	NA	NA	NA	NA	NA	NA	NA	NA	NA	NA	NA	NA	0	0	0	0	0	0	0	0	0	0
402767	A830052D11Rik	NA	-0.350448	0.589722	NA	-0.668752	0.41314	NA	-0.252931	0.859546	NA	2.00658	0.451792	NA	-1.14935	0.347997	NA	1.52894	1.6623	1.23427	1.43732	0.882939	0.930238	0.837619	0.632823	0.852381	1.1151
320174	A830082K12Rik	NA	NA	NA	NA	NA	NA	NA	NA	NA	NA	NA	NA	NA	-0.735979	0.83502	NA	-2.40068	-2.40093	-2.39715	-2.39738	-2.3951	-2.39501	-2.39365	-2.39301	-2.39656	-2.38863
414093	A830082N09Rik	NA	0.332933	0.25047	0.525494	0.479315	0.361306	NA	0.555951	0.114037	0.349341	-0.0829936	0.825989	0.928266	0.803072	0.0309935	0.114909	4.60838	4.38603	3.73637	3.51774	4.57745	4.28212	4.44255	4.46861	4.56301	4.10686
77127	A930001A20Rik	NA	NA	NA	NA	NA	NA	NA	NA	NA	NA	NA	NA	NA	NA	NA	NA	0	0	0	0	0	0	0	0	0	0
319314	A930001C03Rik	NA	0.779696	0.356429	NA	0.486186	0.712031	NA	-0.819222	0.816674	NA	NA	NA	NA	NA	NA	NA	0.116893	-0.164345	-0.245298	-0.354686	-0.676819	-0.598526	-0.666687	-0.663469	-0.686031	-0.685431
319467	A930002C04Rik	NA	NA	NA	NA	-0.727633	0.836864	NA	NA	NA	NA	0.767352	0.828094	NA	NA	NA	NA	-2.33432	-2.33478	-2.32768	-2.31337	-2.32381	-2.32365	-2.30634	-2.31989	-2.32656	-2.32639
320004	A930002H24Rik	NA	-0.441357	0.793287	NA	3.4167	0.0529272	NA	1.11796	0.625316	NA	0.0385384	0.983827	NA	0.000503826	0.999668	NA	-0.2832	-0.21119	0.0588005	-0.438376	-0.199206	-0.346334	-0.185952	-0.166559	0.0653299	0.0289611
109226	A930002I21Rik	NA	NA	NA	NA	-1.28857	0.713768	NA	0.623446	0.859961	NA	NA	NA	NA	-0.735979	0.83502	NA	-2.20251	-2.20329	-2.19122	-2.14184	-2.15959	-2.18438	-2.18001	-2.17798	-2.18933	-2.16397
68162	A930003A15Rik	NA	0.715437	0.423947	NA	-1.00744	0.0535446	0.143825	-1.00185	0.0259509	0.163248	0.164244	0.684843	0.860652	-0.570637	0.141423	0.320221	2.78268	2.61484	3.66525	4.15215	3.93283	4.41085	4.02544	4.03798	3.88045	4.23106
330052	A930003O13Rik	NA	0.734173	0.835418	NA	NA	NA	NA	NA	NA	NA	NA	NA	NA	NA	NA	NA	-2.39355	-2.3997	-2.39683	-2.39701	-2.39527	-2.3952	-2.39416	-2.39368	-2.39638	-2.39631
77940	A930004D18Rik	NA	0.716601	0.431405	NA	1.56651	0.248412	NA	2.0162	0.326306	NA	-1.23755	0.621225	NA	-0.7073	0.801207	NA	0.527272	0.291135	0.305884	-0.0454619	0.0359281	-0.15194	-0.0649451	0.00976319	-0.167497	-0.0980756
68161	A930005H10Rik	NA	-0.270599	0.0623039	0.256963	-0.755521	0.000642978	0.012472	-0.364763	0.0811329	0.296862	-0.0506678	0.848632	0.938375	0.0219793	0.929991	0.965174	6.66263	6.83915	6.15053	6.61344	6.00542	6.26631	5.82245	5.82635	5.80018	5.78095
68163	A930006D01Rik	NA	0.203936	0.863166	NA	2.41504	0.334987	NA	NA	NA	NA	-0.675316	0.848446	NA	0.706689	0.841496	NA	-0.814891	-0.83864	-0.987498	-1.251	-1.23066	-1.22991	-1.21778	-1.14245	-1.17541	-1.24283
319854	A930006I01Rik	NA	0.734173	0.835418	NA	NA	NA	NA	-0.0978839	0.977902	NA	NA	NA	NA	-0.735979	0.83502	NA	-2.17746	-2.2031	-2.19112	-2.19186	-2.15975	-2.15948	-2.18001	-2.17799	-2.18925	-2.16409
100503120	A930006K02Rik	NA	-0.26183	0.400277	0.664211	0.359671	0.264919	0.410965	-0.183182	0.642219	0.820985	0.0286845	0.923054	0.971063	-0.103223	0.678494	0.822475	4.77811	4.92047	5.15355	4.9351	5.08213	4.94341	5.26384	5.48803	5.67904	5.75066
432999	A930007A09Rik	NA	0.365931	0.128799	0.376715	0.34246	0.241089	0.385418	0.0154226	0.969769	0.988096	0.287626	0.504516	0.744575	0.131713	0.648648	0.803069	5.06302	4.82542	4.74589	4.51848	4.43459	4.33466	4.48537	4.43488	4.97041	4.8939
77779	A930007I19Rik	NA	0.583962	0.286589	0.561724	0.272621	0.652731	NA	0.394421	0.650412	NA	-0.316503	0.473946	0.724859	0.529198	0.21329	0.414364	3.17047	2.83038	2.85471	2.73234	2.83465	2.61543	3.3789	3.69906	3.64743	3.33335
77798	A930009A15Rik	ENSMUSG00000092210	NA	NA	NA	NA	NA	NA	NA	NA	NA	NA	NA	NA	NA	NA	NA	0	0	0	0	0	0	0	0	0	0
319818	A930011G23Rik	NA	0.0228356	0.98668	NA	0.780589	0.111958	NA	0.240474	0.647947	NA	-0.361567	0.71695	NA	-0.439624	0.624313	NA	1.54169	1.53201	2.86142	2.42258	2.48387	2.60971	2.23042	2.04035	1.91487	2.05451
626275	A930012L18Rik	NA	NA	NA	NA	-0.727633	0.836864	NA	NA	NA	NA	NA	NA	NA	NA	NA	NA	-2.39983	-2.40003	-2.39692	-2.39064	-2.39522	-2.39515	-2.39402	-2.3935	-2.39643	-2.39635
227923	A930012O16Rik	NA	-0.324054	0.61273	NA	-0.172202	0.833947	NA	0.215678	0.804398	NA	0.472241	0.571991	NA	1.11652	0.137193	NA	2.11032	2.24785	1.98847	2.02697	2.44118	2.07915	2.06303	2.06624	2.4377	1.92801
68074	A930013F10Rik	NA	-0.21346	0.134318	0.38351	-0.423708	0.0761471	0.178128	-0.519416	0.0300282	0.17736	0.0924298	0.524191	0.758523	-0.0789532	0.711942	0.842557	7.9267	8.05908	7.87763	8.10923	8.04304	8.34675	7.87866	7.83483	7.68607	7.72408
77810	A930015D03Rik	NA	-0.190327	0.348647	0.620114	-0.320366	0.297203	0.446093	-0.510758	0.00411779	0.0557503	-0.448894	0.000898898	0.00899483	-0.168281	0.240502	0.445899	6.18529	6.28329	5.59961	5.7209	7.99921	8.3327	7.88688	8.23443	7.55579	7.66897
100503495	A930016O22Rik	NA	0.242689	0.748943	NA	-2.45627	0.32405	NA	1.67841	0.434629	NA	0.0555177	0.98719	NA	1.98559	0.523921	NA	0.568487	0.501538	-0.364144	-0.0880409	-0.0486452	-0.269772	-0.261103	-0.247558	-0.147587	-0.358574
100034748	A930017K11Rik	ENSMUSG00000025727	-0.0103641	0.995628	NA	-1.09649	0.629515	NA	-0.819222	0.816674	NA	0.0460225	0.989609	NA	0.747014	0.731272	NA	-1.13519	-1.14954	-1.23092	-1.05627	-1.27847	-1.21101	-1.19939	-1.19398	-1.10055	-1.15715
239410	A930017M01Rik	NA	NA	NA	NA	NA	NA	NA	NA	NA	NA	NA	NA	NA	NA	NA	NA	0	0	0	0	0	0	0	0	0	0
328399	A930018M24Rik	NA	1.04013	0.00304657	0.0459081	0.848367	0.107397	NA	1.87502	0.573156	NA	1.47957	0.668828	NA	1.8366	0.0653884	NA	3.80964	3.10741	2.76139	2.26504	1.45989	1.27882	1.44603	1.3207	2.19928	1.57877
68243	A930018P22Rik	ENSMUSG00000032671	1.3509	0.598225	NA	NA	NA	NA	-1.35363	0.699955	NA	NA	NA	NA	NA	NA	NA	-1.97791	-2.0398	-2.05559	-2.05649	-2.0476	-1.98634	-2.04197	-2.0395	-2.05329	-2.05292
77806	A930019D19Rik	NA	-0.47138	0.448031	NA	-0.667036	0.176389	0.311749	-0.247981	0.549096	0.766583	0.238968	0.694605	0.864382	-0.655705	0.245358	0.451385	2.83328	3.04413	3.1633	3.47039	3.87005	4.08558	3.42764	3.18351	3.09238	3.36881
109202	A930024E05Rik	NA	-0.124034	0.595484	0.800259	1.00541	0.166154	NA	-0.0696377	0.935467	NA	1.05325	0.434696	NA	0.651112	0.250018	NA	4.50501	4.5907	2.68466	2.31475	2.44542	2.43256	2.28607	2.13805	3.07943	2.73391
320700	A930033H14Rik	ENSMUSG00000090622	0.0501741	0.877147	0.945832	0.236813	0.644596	NA	-0.468812	0.458395	NA	0.776462	0.233005	NA	1.32031	0.00592427	0.0361415	4.3407	4.32137	3.46824	3.33014	3.08048	3.25224	3.39025	3.10567	3.82795	3.13264
78443	A930041C12Rik	NA	-0.235029	0.814462	NA	0.570657	0.76269	NA	0.591046	0.538637	NA	-0.881754	0.447653	NA	0.218844	0.820817	NA	0.960836	0.996551	0.669632	0.597288	1.15543	0.997902	0.920788	1.14494	1.12485	1.05224
53960	AA066038	NA	NA	NA	NA	NA	NA	NA	NA	NA	NA	NA	NA	NA	NA	NA	NA	0	0	0	0	0	0	0	0	0	0
100043450	AA387883	NA	-0.708495	0.841097	NA	NA	NA	NA	NA	NA	NA	NA	NA	NA	NA	NA	NA	-2.39922	-2.3939	-2.39675	-2.39691	-2.39531	-2.39525	-2.39429	-2.39385	-2.39633	-2.39627
433100	AA388235	NA	0.056957	0.743606	0.881312	-0.0327223	0.850622	0.904889	0.175543	0.646009	0.823439	0.301319	0.620549	NA	0.0694446	0.893195	0.947574	5.96665	5.91933	5.98459	5.98842	5.09835	5.15173	4.29486	4.00693	4.09582	4.07642
102402	AA414992	NA	NA	NA	NA	NA	NA	NA	NA	NA	NA	NA	NA	NA	NA	NA	NA	0	0	0	0	0	0	0	0	0	0
613254	AA465934	NA	-0.46906	0.0981962	0.329145	-0.646017	0.0951963	0.206851	0.170957	0.695481	0.851959	0.364057	0.380397	0.651278	-0.679699	0.0807628	0.221503	4.44833	4.73032	4.05981	4.4042	4.69615	4.47372	4.45103	4.30991	4.08003	4.46257
433470	AA467197	ENSMUSG00000033213 /// ENSMUSG00000110868	-0.489205	0.0539251	0.238846	-0.616238	0.0126078	0.0621917	-0.0845043	0.677631	0.840918	0.200324	0.025709	0.118097	-0.141931	0.291722	0.502547	7.53881	7.66674	7.91324	8.13979	10.7387	10.2703	11.5657	11.9264	11.2205	11.3278
767812	AA474408	NA	0.258238	0.307269	0.582224	0.194534	0.388592	0.536055	0.372365	0.301309	0.576546	0.10785	0.739517	0.888718	-0.0877523	0.787406	0.890312	5.47033	5.29282	5.59872	5.4588	5.39946	5.1516	5.3603	5.29163	5.00939	5.06201
380934	AA536875	NA	NA	NA	NA	NA	NA	NA	NA	NA	NA	NA	NA	NA	NA	NA	NA	0	0	0	0	0	0	0	0	0	0
100272219	AA543186	NA	0.515415	0.351571	NA	-0.153149	0.86337	NA	0.160036	0.831504	NA	0.105042	0.881644	NA	0.20786	0.724924	0.852158	2.6291	2.40361	1.95783	2.00189	2.39099	2.23123	2.38244	2.43829	2.72284	2.63412
57866	AA545190	NA	NA	NA	NA	NA	NA	NA	NA	NA	NA	NA	NA	NA	NA	NA	NA	0	0	0	0	0	0	0	0	0	0
241051	AA619741	NA	NA	NA	NA	NA	NA	NA	NA	NA	NA	NA	NA	NA	NA	NA	NA	0	0	0	0	0	0	0	0	0	0
544808	AA623943	NA	NA	NA	NA	NA	NA	NA	NA	NA	NA	NA	NA	NA	NA	NA	NA	0	0	0	0	0	0	0	0	0	0
100504672	AA666905	NA	-0.267023	0.495736	0.734984	-0.380751	0.665939	NA	0.548033	0.675466	NA	-1.2376	0.421404	NA	-0.367577	0.643319	NA	2.6347	2.793	1.62353	1.74073	1.47973	1.4331	1.46862	1.58831	1.79872	1.97006
100503467	AA667203	NA	-0.265722	0.339026	0.611478	-0.763868	0.0402555	0.119934	-1.0038	0.0832321	0.300677	0.368223	0.536337	0.766601	0.789231	0.145632	0.32611	4.93347	5.1106	5.09261	5.54145	3.75995	4.31534	3.98254	3.71269	4.17879	3.80237
100554	AA792892	ENSMUSG00000073497	NA	NA	NA	NA	NA	NA	NA	NA	NA	NA	NA	NA	NA	NA	NA	0	0	0	0	0	0	0	0	0	0
212439	AA986860	ENSMUSG00000042510	-0.317772	0.296928	0.571859	-0.463962	0.227143	0.369823	-0.107897	0.80472	0.913502	-0.659763	0.115151	0.32758	-0.708825	0.0555539	0.172475	4.31365	4.49245	3.97595	4.23559	4.0661	4.07005	4.06796	4.50445	4.08563	4.48322
223921	Aaas	ENSMUSG00000036678	-0.089053	0.309857	0.584443	-0.0692401	0.446014	0.589659	-0.0223507	0.834168	0.928344	-0.0979108	0.476238	0.725886	-0.071228	0.549045	0.732633	9.2291	9.28315	9.25615	9.28463	8.81312	8.94459	8.47303	8.42293	8.31574	8.35649
78894	Aacs	ENSMUSG00000029482	-0.0984781	0.328144	0.601197	-0.186715	0.0846424	0.190882	0.050756	0.737212	0.876107	0.252437	0.030641	0.13372	0.0174394	0.870692	0.936957	10.1165	10.1714	10.0581	10.1545	10.5274	10.3088	11.1242	11.1345	11.3663	11.3445
67758	Aadac	ENSMUSG00000027761	NA	NA	NA	NA	NA	NA	NA	NA	NA	NA	NA	NA	NA	NA	NA	0	0	0	0	0	0	0	0	0	0
639634	Aadacl2	ENSMUSG00000091376	NA	NA	NA	NA	NA	NA	NA	NA	NA	NA	NA	NA	NA	NA	NA	0	0	0	0	0	0	0	0	0	0
230883	Aadacl3	ENSMUSG00000078507	NA	NA	NA	NA	NA	NA	NA	NA	NA	NA	NA	NA	NA	NA	NA	0	0	0	0	0	0	0	0	0	0
435815	Aadacl4	ENSMUSG00000070609	NA	NA	NA	NA	NA	NA	NA	NA	NA	NA	NA	NA	NA	NA	NA	0	0	0	0	0	0	0	0	0	0
23923	Aadat	ENSMUSG00000057228	NA	NA	NA	NA	NA	NA	NA	NA	NA	NA	NA	NA	NA	NA	NA	0	0	0	0	0	0	0	0	0	0
66129	Aaed1	ENSMUSG00000021482	0.18393	0.11895	0.361719	0.424539	0.00250422	0.0257851	0.109672	0.603819	0.799558	0.575283	0.0521527	0.192431	0.573818	0.000797499	0.00796341	7.94962	7.81699	8.09353	7.77234	7.08256	7.18738	6.73831	6.23779	7.29983	6.93279
66939	Aagab	ENSMUSG00000037257	-0.192795	0.112682	0.351868	-0.344903	0.0446604	0.127472	-0.164558	0.116848	0.353648	-0.054112	0.560795	0.781979	-0.162801	0.167255	0.357327	11.0289	11.1476	10.8104	11.0144	9.8669	9.95189	9.93801	9.99601	10.7016	10.8087
269774	Aak1	ENSMUSG00000057230	0.0114756	0.895693	0.954114	0.30378	0.0604059	0.154545	-0.00109392	0.993627	0.997835	-0.131592	0.199785	0.459986	0.16276	0.191173	0.388667	9.97106	9.9571	10.1903	9.9628	9.71104	9.68758	9.79571	9.91112	10.1703	10.0643
66273	Aamdc	ENSMUSG00000035642	-0.416765	0.00223331	0.0377257	-0.596618	0.0127492	0.0626039	-0.510695	0.0122354	0.107594	-0.111722	0.649393	0.839264	-0.135193	0.60801	0.776738	7.08988	7.36639	7.0979	7.47166	6.54589	7.05782	6.29775	6.20391	6.07466	6.15943
227290	Aamp	ENSMUSG00000006299	-0.251118	0.0286385	0.169873	-0.525376	0.00191412	0.0223121	-0.241477	0.0731417	0.280777	-0.0472634	0.609429	0.813674	-0.286091	0.0173212	0.076727	12.2008	12.3522	12.2612	12.5774	12.3031	12.4577	12.33	12.3702	12.2345	12.4232
11298	Aanat	ENSMUSG00000020804	0.132825	0.911098	NA	-0.4627	0.417953	NA	0.229383	0.668848	0.835717	0.166942	0.678318	0.857343	0.190139	0.720513	0.848987	2.26866	2.21995	2.91339	3.13353	3.7645	3.43883	4.01106	4.01225	3.28612	3.17544
68295	Aar2	ENSMUSG00000027628	-0.0751463	0.560179	0.773642	-0.162758	0.210984	0.351147	-0.223892	0.0114718	0.10351	-0.29205	0.000144717	0.0020938	-0.306181	0.000574125	0.0061847	9.89697	9.93055	9.89474	9.97479	10.3711	10.532	10.2959	10.4945	10.0857	10.284
239435	Aard	ENSMUSG00000068522	-0.712231	0.801549	NA	-0.727633	0.836864	NA	NA	NA	NA	NA	NA	NA	-1.61726	0.602891	NA	-1.97059	-1.93746	-1.98938	-1.95619	-1.98041	-1.98004	-1.97409	-1.97131	-1.9868	-1.88379
234734	Aars	ENSMUSG00000031960	-0.0587973	0.498221	0.736261	-0.0882598	0.322402	0.472382	0.0137546	0.899792	0.95671	0.0254101	0.769293	0.902659	-0.246387	0.000386978	0.0045262	11.7387	11.7685	11.9	11.9375	12.2412	12.213	12.3605	12.3722	12.5026	12.6695
224805	Aars2	ENSMUSG00000023938	-0.131061	0.215597	0.489687	0.0964828	0.432733	0.576439	0.0600434	0.705677	0.857645	0.0372508	0.816528	0.923966	0.0186638	0.888457	0.945873	7.75689	7.83839	7.643	7.56189	7.41356	7.41485	7.41419	7.35965	7.71274	7.69912
69684	Aarsd1	ENSMUSG00000075528	-0.0859846	0.410663	0.671792	-0.408962	0.0156901	0.0700638	-0.242633	0.0495171	0.228116	-0.116533	0.357373	0.631071	-0.0868503	0.530346	0.718326	9.32082	9.37006	9.11926	9.36611	8.92734	9.23288	8.7216	8.66105	8.66223	8.71767
231326	Aasdh	ENSMUSG00000055923	-0.0532124	0.70666	0.861799	0.177597	0.195413	0.333484	0.389982	0.040977	0.207074	0.217724	0.234375	0.502501	0.248813	0.116538	0.284101	7.63686	7.66001	7.24732	7.11434	7.03285	6.74181	6.97292	6.88778	7.29735	7.12938
67618	Aasdhppt	ENSMUSG00000025894	-0.217326	0.0185396	0.135278	-0.255194	0.064728	0.161102	-0.111159	0.403941	0.664226	0.192673	0.192909	0.449913	-0.0827028	0.549066	0.732633	8.39706	8.53611	8.31181	8.46327	8.23927	8.31955	8.13596	8.01236	8.19509	8.24647
30956	Aass	ENSMUSG00000029695	-1.24885	0.722196	NA	NA	NA	NA	NA	NA	NA	NA	NA	NA	NA	NA	NA	-2.33129	-2.31052	-2.32654	-2.32685	-2.32377	-2.32366	-2.32182	-2.32097	-2.32574	-2.32562
56321	Aatf	ENSMUSG00000018697	-0.02626	0.760605	0.890153	-0.13827	0.145571	0.274188	-0.00371441	0.974966	0.990331	0.115648	0.342729	0.617204	-0.257812	0.030839	0.114473	8.90869	8.91951	8.97003	9.04291	9.03364	9.09553	8.92177	8.79797	8.88211	9.04729
11302	Aatk	ENSMUSG00000025375	-0.123269	0.135609	0.385639	-0.120123	0.203689	0.343488	-0.15189	0.521217	0.748765	-0.201553	0.349803	0.623279	-0.235557	0.0989847	0.254444	8.85366	8.93581	8.50486	8.57002	6.80176	6.86009	6.95458	7.10259	7.86399	8.01418
382062	AB124611	ENSMUSG00000057191	-0.174469	0.0683239	0.270802	-0.252975	0.0728571	0.17322	-0.344053	0.0167323	0.12839	-0.229696	0.00277969	0.02208	-0.250789	0.00944016	0.0506038	11.5645	11.6639	11.5345	11.6672	11.8236	11.7672	12.2395	12.6789	12.4231	12.5929
268860	Abat	ENSMUSG00000057880	-1.06931	0.414309	NA	-1.04404	0.477019	NA	-0.119688	0.936415	NA	0.353698	0.817007	NA	0.965672	0.44097	NA	0.0929332	0.294371	0.0863746	0.272958	0.245496	0.201315	0.211296	0.220828	0.395234	0.176748
11303	Abca1	ENSMUSG00000015243	0.0705416	0.475225	0.720663	0.375859	0.0585159	0.151191	0.16917	0.383376	0.646745	0.193712	0.0591285	0.208595	0.573029	1.3728e-06	4.55344e-05	13.0883	13.0373	13.5993	13.3088	13.4299	13.2178	13.5213	13.4939	13.7734	13.3828
74591	Abca12	ENSMUSG00000050296	NA	NA	NA	NA	NA	NA	NA	NA	NA	NA	NA	NA	NA	NA	NA	0	0	0	0	0	0	0	0	0	0
268379	Abca13	ENSMUSG00000004668	-0.0865063	0.897154	NA	0.777651	0.291534	NA	0.468448	0.318387	0.59232	0.504204	0.20299	0.463781	0.547887	0.276431	0.487353	2.96077	2.96125	3.31451	2.98643	3.84213	3.50103	4.12731	3.94294	3.79847	3.55597
67928	Abca14	ENSMUSG00000062017	-2.71482	0.0991042	NA	-1.45961	0.306249	NA	-0.460402	0.833764	NA	0.767352	0.828094	NA	-0.7073	0.801207	NA	-0.864976	-0.471667	-0.709768	-0.419205	-0.821738	-0.681547	-0.727479	-0.874815	-0.831362	-0.761097
320631	Abca15	ENSMUSG00000054746	NA	NA	NA	NA	NA	NA	NA	NA	NA	NA	NA	NA	-0.735979	0.83502	NA	-2.4003	-2.40053	-2.39705	-2.39726	-2.39515	-2.39507	-2.39382	-2.39323	-2.3965	-2.38919
233810	Abca16	ENSMUSG00000051900	NA	NA	NA	NA	NA	NA	NA	NA	NA	NA	NA	NA	NA	NA	NA	0	0	0	0	0	0	0	0	0	0
381072	Abca17	ENSMUSG00000035435	0.746304	0.112041	0.350784	0.490873	0.541749	NA	-0.701632	0.257333	NA	-0.315599	0.54144	0.769784	-0.00740197	0.986534	0.993197	3.39325	2.94227	2.58204	2.40266	2.865	3.05149	3.05576	3.36472	3.37785	3.36757
11305	Abca2	ENSMUSG00000026944	-0.131544	0.347277	0.61901	0.240367	0.179811	0.315724	-0.139183	0.407099	0.666303	-0.0862424	0.504091	0.744483	0.231199	0.0519224	0.164125	9.57775	9.65128	9.61871	9.42555	9.0799	9.32038	8.73356	8.63086	8.94038	8.79361
27410	Abca3	ENSMUSG00000024130	0.0857769	0.439842	0.693817	0.449805	0.0260308	0.0925532	0.0862604	0.677638	0.840918	0.0552394	0.578593	0.795121	0.463575	0.000414072	0.00477437	10.3357	10.2743	10.4473	10.125	10.2454	10.1608	10.2586	10.2437	10.895	10.5901
11304	Abca4	ENSMUSG00000028125	0.734173	0.835418	NA	NA	NA	NA	NA	NA	NA	0.0460226	0.989579	NA	-1.40822	0.575632	NA	-1.97176	-2.01245	-1.99344	-1.99461	-1.94363	-1.98267	-1.9758	-1.93313	-1.951	-1.87159
217265	Abca5	ENSMUSG00000018800	0.275347	0.131016	0.379715	0.703271	0.00124517	0.0176235	0.103246	0.674212	0.838652	-0.0154896	0.964039	0.987471	0.51612	0.233828	0.438189	6.26027	6.06488	6.97859	6.44446	6.21039	6.3445	5.49578	5.28355	4.93493	4.67187
76184	Abca6	ENSMUSG00000044749	0.324516	0.158941	0.418822	0.714624	0.0133232	0.0638317	0.726344	0.0441634	0.214737	0.509056	0.539481	NA	0.317345	0.887487	NA	5.16707	4.93994	5.48558	4.95493	4.39592	4.20305	3.60947	3.14082	2.68101	2.67188
27403	Abca7	ENSMUSG00000035722	-0.0280367	0.712324	0.865154	0.025297	0.73299	0.822973	0.185333	0.0766353	0.28806	0.137784	0.0351386	0.147436	0.0967413	0.177236	0.370274	11.3492	11.3609	11.2494	11.2172	11.9784	11.778	12.2441	12.2349	12.3064	12.2351
217258	Abca8a	ENSMUSG00000041828	-3.09588	0.207571	NA	0.00803202	0.995782	NA	NA	NA	NA	-1.24849	0.722323	NA	-0.0214085	0.995164	NA	-1.39089	-1.05587	-1.10535	-1.11113	-1.34681	-1.34609	-1.33454	-1.19647	-1.29285	-1.29205
27404	Abca8b	ENSMUSG00000020620	0.346783	0.120715	0.364493	0.972152	7.30564e-07	8.67967e-05	0.0306669	0.923909	0.966752	-0.30592	0.43031	0.69221	-0.0765115	0.85244	0.92701	5.82067	5.5661	6.48417	5.78151	5.4017	5.42865	5.09035	5.18471	4.69606	4.72685
217262	Abca9	ENSMUSG00000041797	0.181606	0.226026	0.501742	0.493576	0.0707991	0.169791	0.0592879	0.812437	0.918837	-0.70374	6.98462e-06	0.000164239	0.0131535	0.949271	0.974557	9.02083	8.87256	9.10797	8.69189	8.4289	8.66055	7.77987	7.87822	7.1743	7.16688
56199	Abcb10	ENSMUSG00000031974	0.0105083	0.901404	0.957028	0.0671593	0.488771	0.62739	-0.0892006	0.358961	0.62863	0.19415	0.0701864	0.233158	0.605137	9.67684e-09	6.65121e-07	9.07251	9.0589	8.93522	8.87232	9.06503	9.14648	8.99505	8.85641	8.9731	8.58101
27413	Abcb11	ENSMUSG00000027048	0.2426	0.784042	NA	1.3896	0.0971668	NA	0.548046	0.664529	NA	-1.9022	0.525522	NA	NA	NA	NA	1.06358	0.915438	1.2848	0.723388	0.573493	0.578276	0.380362	0.477019	0.216798	0.217891
18671	Abcb1a	ENSMUSG00000040584	-0.458035	0.151314	0.408371	0.0572271	0.871665	0.919995	-0.290282	0.474786	0.717064	-0.717793	0.0104385	0.0609738	-0.602014	0.0897115	0.238025	4.41973	4.67963	4.7747	4.74287	4.78882	4.59032	5.21159	6.18004	4.77567	5.19604
18669	Abcb1b	ENSMUSG00000028970	0.152018	0.117611	0.359849	0.289959	0.0368433	0.114295	0.0984561	0.390493	0.652671	-0.104351	0.277082	0.5494	0.326929	0.010816	0.0553051	10.3492	10.2391	10.7236	10.5003	10.3237	10.4886	9.85158	9.68513	8.99662	8.82037
18670	Abcb4	ENSMUSG00000042476	-0.262562	0.00497567	0.0634428	-0.112591	0.285032	0.43282	-0.23221	0.103341	0.333591	-0.147043	0.289743	0.564075	0.138736	0.395596	0.605957	9.50073	9.67714	9.65305	9.71231	9.14449	9.63577	8.50594	8.25882	7.744	7.67073
77706	Abcb5	ENSMUSG00000072791	NA	NA	NA	NA	NA	NA	1.23803	0.724405	NA	NA	NA	NA	NA	NA	NA	-2.335	-2.33549	-2.32793	-2.3284	-2.29245	-2.32365	-2.32092	-2.31965	-2.32675	-2.32656
74104	Abcb6	ENSMUSG00000026198	-0.220737	0.0226458	0.150612	-0.231953	0.0220749	0.0840029	0.0246879	0.833998	0.928344	0.217839	0.0375137	0.15395	0.0448237	0.636668	0.795561	9.1212	9.25799	9.08409	9.21611	9.339	9.30692	9.44265	9.31922	9.45356	9.42073
11306	Abcb7	ENSMUSG00000031333	0.113061	0.148121	0.404119	0.20311	0.0969652	0.209385	0.0189471	0.883933	0.950488	0.136018	0.149231	0.384002	0.176953	0.11714	0.284839	10.3711	10.2884	10.5471	10.3858	10.2936	10.3315	10.0955	9.9603	10.0034	9.88555
74610	Abcb8	ENSMUSG00000028973	0.0713204	0.342771	0.614751	0.0611324	0.430718	0.5746	-0.0394934	0.713253	0.861973	0.0188273	0.869283	0.947181	0.128431	0.168482	0.358648	9.86037	9.80512	9.7283	9.66793	9.22894	9.31014	9.04692	8.98809	9.40448	9.31564
56325	Abcb9	ENSMUSG00000029408	-0.369738	0.131813	0.380206	-0.316107	0.237237	0.381035	-0.709945	0.127962	0.370272	0.104322	0.803869	0.917638	-0.519289	0.136854	0.314285	4.76616	5.0015	4.6543	4.83698	3.94244	4.13897	4.1644	4.26266	4.34832	4.63997
17250	Abcc1	ENSMUSG00000023088	0.176132	0.18831	0.456551	0.401672	0.0471162	0.132161	0.259764	0.0773408	0.289885	0.558455	6.24058e-10	5.56135e-08	0.700585	1.83009e-06	5.76128e-05	12.3776	12.2533	12.6083	12.3178	13.3769	13.2095	13.3053	12.9081	13.1859	12.7155
224814	Abcc10	ENSMUSG00000032842	0.216347	0.143911	0.398278	0.197095	0.347334	0.496842	0.115787	0.494184	0.73078	0.198513	0.376923	0.648313	0.174109	0.242964	0.448984	7.64749	7.48722	7.6006	7.42382	6.86595	6.81552	6.79958	6.67117	7.27081	7.15809
244562	Abcc12	ENSMUSG00000036872	0.747503	0.789476	NA	-0.727633	0.836864	NA	NA	NA	NA	NA	NA	NA	0.721637	0.794125	NA	-1.93586	-1.97183	-1.98991	-1.95606	-1.98076	-1.98038	-1.97431	-1.97148	-1.91751	-1.95197
12780	Abcc2	ENSMUSG00000025194	-0.931909	0.0712595	0.276856	0.245646	0.701235	0.800116	-0.753687	0.315629	NA	-1.7831	0.173651	NA	-0.847284	0.732613	NA	2.4431	3.04737	2.86732	2.79892	2.15257	2.54839	1.77873	2.0564	1.43172	1.54507
76408	Abcc3	ENSMUSG00000020865	-0.354902	3.965e-07	5.47472e-05	-0.320512	0.00074561	0.013393	-0.481911	1.31868e-05	0.000892675	-0.845578	1.43734e-17	5.89212e-15	-0.246452	0.0194148	0.0826564	11.2604	11.5024	11.2198	11.4239	10.6175	11.2036	10.2175	10.4747	9.86124	10.0014
239273	Abcc4	ENSMUSG00000032849	-0.0389477	0.755066	0.887782	0.169186	0.300623	0.44986	0.0428874	0.758947	0.887175	0.142478	0.107585	0.312562	0.369206	0.0140461	0.066249	9.21123	9.22566	9.31803	9.18726	9.73061	9.54108	10.0087	10.0751	10.359	10.1043
27416	Abcc5	ENSMUSG00000022822	0.137044	0.239777	0.515029	0.399527	0.00268559	0.0267457	0.27609	0.00552476	0.0673191	0.0185698	0.817276	0.924221	0.0618279	0.543642	0.72894	11.7906	11.7028	12.0795	11.82	12.824	12.4847	13.3039	13.4595	13.4462	13.3981
27421	Abcc6	ENSMUSG00000030834	NA	NA	NA	NA	NA	NA	NA	NA	NA	NA	NA	NA	NA	NA	NA	0	0	0	0	0	0	0	0	0	0
20927	Abcc8	ENSMUSG00000040136	NA	NA	NA	NA	NA	NA	-0.819222	0.816674	NA	NA	NA	NA	0.706689	0.841496	NA	-2.33395	-2.3344	-2.32754	-2.32796	-2.32381	-2.30942	-2.32118	-2.32002	-2.31223	-2.32629
20928	Abcc9	ENSMUSG00000030249	NA	NA	NA	-0.727633	0.836864	NA	0.623446	0.859961	NA	NA	NA	NA	NA	NA	NA	-2.33326	-2.33367	-2.32728	-2.3144	-2.3238	-2.32365	-2.30807	-2.32027	-2.32628	-2.32612
11666	Abcd1	ENSMUSG00000031378	0.0222562	0.752515	0.886507	0.124527	0.124007	0.246299	-0.10531	0.387101	0.649521	-0.251113	0.0012962	0.0120307	0.0337121	0.71203	0.842557	11.4107	11.3887	11.3387	11.2359	10.896	11.0128	10.7688	10.8814	11.4172	11.3925
26874	Abcd2	ENSMUSG00000055782	0.369579	0.000978241	0.0220168	0.442268	0.00351927	0.0314419	-0.324191	0.460599	0.707564	0.576622	0.122474	0.340381	1.44325	7.77152e-07	2.81138e-05	7.93852	7.65281	7.48953	7.14382	5.45168	5.4448	5.43888	5.26903	6.25729	5.3966
19299	Abcd3	ENSMUSG00000028127	0.0209427	0.785392	0.904272	0.0529464	0.6093	0.728166	-0.052271	0.65334	0.827486	-0.104379	0.247383	0.518106	-0.0170826	0.860874	0.931496	10.0628	10.0421	10.1307	10.0756	9.88184	9.95432	9.77061	9.80393	9.96584	9.97299
19300	Abcd4	ENSMUSG00000021240	0.110039	0.163095	0.424408	0.124541	0.226851	0.369444	0.129781	0.304257	0.579556	0.269411	0.0647089	0.221488	0.459052	0.000552952	0.00601153	9.01415	8.93088	8.60521	8.50211	8.12538	8.05425	8.00349	7.83949	8.62353	8.31047
24015	Abce1	ENSMUSG00000058355	0.151814	0.0657828	0.264359	0.231315	0.0841469	0.190095	0.213973	0.0684611	0.271863	0.161974	0.025306	0.11691	0.0698687	0.5123	0.704893	10.9499	10.8463	11.1427	10.9708	11.5643	11.4399	11.4473	11.319	11.19	11.1374
224742	Abcf1	ENSMUSG00000038762	-0.09151	0.268989	0.544263	-0.15759	0.0809422	0.185036	-0.0752624	0.360696	0.629841	-0.099591	0.131553	0.354641	-0.231572	0.00161009	0.0135511	11.8673	11.9176	11.9356	12.0203	12.2148	12.2191	12.2976	12.42	12.1879	12.3399
27407	Abcf2	ENSMUSG00000028953	-0.0543028	0.453305	0.703696	-0.0035994	0.964861	0.978711	0.00653361	0.950156	0.978423	-0.0480346	0.505664	0.745427	-0.307257	6.51283e-06	0.000163913	10.4917	10.5196	10.5908	10.5758	10.7766	10.6717	10.9659	11.1055	10.963	11.1639
27406	Abcf3	ENSMUSG00000003234	-0.0832885	0.305922	0.580713	-0.248032	0.0157722	0.0702783	-0.0779439	0.457715	0.705757	0.0219153	0.795322	0.914039	-0.247626	0.00259543	0.0193205	10.5105	10.5573	10.3883	10.5278	10.5051	10.5121	10.6756	10.7136	10.7336	10.8951
11307	Abcg1	ENSMUSG00000024030	0.154474	0.124305	0.369539	0.159492	0.179955	0.315767	-0.0565833	0.778032	0.897928	-0.385858	0.00797964	0.0498393	0.111202	0.321709	0.533681	13.0732	12.9594	12.9219	12.7998	12.4875	12.3465	12.6505	13.1165	12.9982	12.9198
26357	Abcg2	ENSMUSG00000029802	-0.131991	0.184516	0.451267	-0.238825	0.0387478	0.117778	-0.278531	0.0296161	0.175778	-0.00131945	0.993763	0.997738	0.256666	0.183741	0.37976	8.41893	8.50296	8.52583	8.67235	8.13637	8.41606	7.73479	7.64853	7.65079	7.49182
27405	Abcg3	ENSMUSG00000029299	0.0572298	0.683943	0.851861	-0.00860173	0.964128	0.978293	-0.396471	0.122931	0.36138	-0.760076	0.397443	NA	2.20114	0.00409366	NA	6.54517	6.49632	6.25812	6.24995	4.98106	5.44808	3.99066	4.09953	4.12229	3.50197
192663	Abcg4	ENSMUSG00000032131	-1.65348	0.496049	NA	-0.434055	0.761421	NA	-0.469264	0.778217	NA	-0.389441	0.62764	NA	-0.38968	0.66576	NA	0.585752	0.742013	1.04429	1.06882	1.14147	0.945085	1.4973	1.79586	1.2386	1.4226
27409	Abcg5	ENSMUSG00000040505	-1.0009	0.50193	NA	-0.439544	0.70599	NA	0.186142	0.925616	NA	-1.94342	0.370676	NA	-0.0444495	0.989943	NA	-0.45474	-0.295728	-0.276467	-0.174749	-0.529652	-0.392625	-0.383848	-0.263456	-0.542648	-0.54083
67470	Abcg8	ENSMUSG00000024254	0.347559	0.644263	NA	-0.0626059	0.969148	NA	1.3938	0.210256	NA	-0.324209	0.819257	NA	-1.70789	0.151015	NA	1.23812	1.1029	0.64241	0.683392	1.05597	0.788742	0.996322	0.896269	0.710799	1.14381
57742	Abhd1	ENSMUSG00000006638	-1.71483	0.0136072	0.115559	-0.963439	0.312599	NA	-1.66122	0.118062	NA	-0.742439	0.273624	0.54663	-0.415074	0.467131	0.667952	2.63541	3.50272	2.59906	3.02955	2.40637	2.92094	2.90151	3.41039	3.44015	3.63623
213012	Abhd10	ENSMUSG00000033157	0.0442679	0.669069	0.843014	-0.105097	0.405155	0.55229	0.0548281	0.635313	0.817693	-0.196451	0.0997814	0.296189	-0.186811	0.115724	0.282952	8.51543	8.48122	8.56921	8.621	8.48824	8.52477	8.38204	8.4437	8.1559	8.26932
68758	Abhd11	ENSMUSG00000040532	-0.0567842	0.59655	0.800708	-0.196558	0.151823	0.281968	0.0899246	0.539438	0.759892	0.332362	0.0683226	0.229509	0.103027	0.430558	0.637184	8.6559	8.68595	8.49913	8.61096	8.16188	8.1599	8.21354	7.98151	8.82378	8.75446
69812	Abhd11os	NA	1.34816	0.150378	NA	0.926491	0.535447	NA	0.367053	0.858223	NA	-0.160148	0.912633	NA	-0.409285	0.615003	NA	1.088	0.679328	0.710477	0.533499	0.749378	0.568509	0.522763	0.844024	1.0509	1.22758
76192	Abhd12	ENSMUSG00000032046	-0.27189	0.00165436	0.0304017	-0.321235	0.000272227	0.00718726	-0.39106	1.20734e-06	0.000126568	-0.580405	3.49135e-16	1.19268e-13	-0.320274	3.16801e-06	8.90788e-05	13.2322	13.4083	13.2434	13.4423	12.9103	13.2658	12.6624	12.9478	12.5016	12.697
100504285	Abhd12b	ENSMUSG00000090121	0.182805	0.919553	NA	NA	NA	NA	1.91598	0.560257	NA	NA	NA	NA	0.706689	0.841496	NA	-1.62445	-1.58914	-1.74339	-1.74477	-1.68451	-1.73066	-1.62923	-1.71875	-1.69322	-1.73931
68904	Abhd13	ENSMUSG00000040396	0.00897986	0.913014	0.961893	4.28501e-05	0.999699	0.999912	-0.00157004	0.987073	0.995076	-0.0631921	0.438421	0.698407	-0.0190822	0.823177	0.910718	9.58111	9.56937	9.68353	9.6683	9.89617	9.87299	9.91966	9.99466	9.98185	9.99127
68644	Abhd14a	ENSMUSG00000042210	-0.0310968	0.865502	0.941808	-0.430203	0.050576	0.138256	-0.226552	0.288939	0.564127	0.305333	0.339115	0.613426	-0.131987	0.649624	0.803514	6.32609	6.32939	6.21497	6.47677	6.03637	6.25374	5.64974	5.38833	5.44721	5.52147
76491	Abhd14b	ENSMUSG00000042073	-0.0805833	0.515285	0.74654	-0.194218	0.365569	0.513993	-0.235827	0.167036	0.42589	0.0973866	0.626305	0.82448	0.175243	0.35338	0.56647	8.18502	8.22941	7.75836	7.86767	7.29163	7.55762	6.92914	6.76895	7.12346	7.00905
67477	Abhd15	ENSMUSG00000000686	-0.491347	4.55589e-06	0.000380746	-0.411626	0.0047244	0.0361677	-0.0242142	0.926213	0.967948	0.276638	0.439252	0.698825	-0.251782	0.319914	0.532301	7.50234	7.8555	6.95208	7.21923	5.71347	5.84355	5.56709	5.31698	5.88649	6.01864
193742	Abhd16a	ENSMUSG00000007036	-0.225149	0.00912017	0.0904717	-0.311847	0.00989283	0.0544238	-0.228829	0.0560233	0.245918	-0.270907	0.000112013	0.00168197	-0.233509	0.0214442	0.088613	10.5441	10.6801	10.4672	10.6402	11.2009	11.3116	11.2986	11.5383	10.7575	10.9024
241850	Abhd16b	ENSMUSG00000055882	-1.86585	0.506346	NA	-0.0158051	0.99643	NA	-0.111469	0.974824	NA	NA	NA	NA	0.958827	0.670135	NA	-1.60254	-1.4003	-1.52072	-1.52239	-1.50592	-1.50531	-1.55191	-1.54733	-1.35617	-1.45936
216169	Abhd17a	ENSMUSG00000003346	-0.289915	0.0223605	0.149606	-0.555996	0.00341164	0.030792	-0.327709	0.0118542	0.105664	-0.0185785	0.864846	0.944991	-0.0568788	0.603778	0.774087	10.7433	10.9279	10.5109	10.8493	10.1918	10.5053	10.0113	9.93181	10.317	10.3533
226016	Abhd17b	ENSMUSG00000047368	-0.0256791	0.724622	0.871096	-0.0998675	0.195636	0.33356	-0.0121911	0.907231	0.959342	-0.211735	0.0279195	0.125038	-0.200616	0.0187455	0.0807239	9.89964	9.90961	9.88218	9.92802	10.6912	10.841	10.3854	10.3977	9.9145	10.0389
70178	Abhd17c	ENSMUSG00000038459	-0.0856127	0.358236	0.628372	-0.0325197	0.718221	0.812617	0.222891	0.0133948	0.112952	0.28511	0.00480878	0.0337548	-0.208332	0.0960093	0.249909	10.7	10.747	11.7749	11.7772	11.9463	12.0087	11.5333	11.1316	11.1652	11.296
269423	Abhd18	ENSMUSG00000037818 /// ENSMUSG00000115963	0.0653238	0.780255	0.901298	0.325919	0.195264	0.333311	0.500481	0.108983	0.341203	0.616673	0.00403014	0.0293617	0.735038	0.000250164	0.00322398	5.83226	5.78273	5.67927	5.47544	5.79744	5.3698	6.12247	5.83465	6.53577	6.04778
54608	Abhd2	ENSMUSG00000039202	0.263406	0.152732	0.410431	0.851285	0.0163092	0.071652	0.247175	0.3622	0.631028	-0.114317	0.361244	0.633532	0.461409	0.0339179	0.121792	7.74451	7.56816	8.09068	7.47508	8.23845	7.97528	8.46089	8.59864	8.63445	8.33626
106861	Abhd3	ENSMUSG00000002475	-0.188367	0.35321	0.623864	0.0804496	0.730971	0.821902	-0.0886245	0.764341	0.890987	0.250823	0.521181	0.756479	0.31704	0.333123	0.545519	5.34453	5.46353	5.42718	5.35311	5.02144	5.04281	4.77281	4.66952	4.98803	4.80056
105501	Abhd4	ENSMUSG00000040997	-0.173745	0.0564014	0.244328	-0.136742	0.133725	0.258496	-0.239367	0.10057	0.329812	-0.177488	0.0689169	0.230373	-0.0571731	0.587246	0.761973	10.604	10.7153	10.5368	10.6111	10.2669	10.4831	10.0614	10.126	10.1614	10.1922
67469	Abhd5	ENSMUSG00000032540	0.052686	0.549117	0.766416	-0.0497372	0.593507	0.714684	-0.190895	0.0862949	0.304431	0.0427724	0.590478	0.802309	-0.147222	0.0653636	0.193556	10.1944	10.1533	10.2356	10.2508	9.95205	9.88352	10.3622	10.5289	10.3303	10.4258
66082	Abhd6	ENSMUSG00000025277	-0.269132	0.290266	0.565182	-1.13594	0.000240062	0.00665068	-0.902835	0.0130674	0.111737	-0.610125	0.086595	0.269334	-1.1896	0.00512688	0.0324449	4.72284	4.88492	4.29569	4.95301	4.39988	4.81858	4.29795	4.79828	3.94884	4.57115
64296	Abhd8	ENSMUSG00000007950	-0.34612	0.000291397	0.00958967	-0.515377	0.00222003	0.0241467	-0.368532	0.0150351	0.120657	0.146523	0.519216	0.754749	0.00412234	0.978187	0.989706	8.32544	8.5613	7.96901	8.30345	7.19517	7.62101	7.1254	6.86091	7.80178	7.80067
11308	Abi1	ENSMUSG00000058835	0.0258154	0.736138	0.876901	0.161079	0.234245	0.377518	0.0495987	0.697134	0.852493	-0.085196	0.245463	0.516315	-0.116133	0.282975	0.493859	12.7568	12.7341	13.1872	13.0614	13.7759	13.7942	13.6403	13.6494	13.2314	13.3084
329165	Abi2	ENSMUSG00000026782	0.178235	0.087927	0.308802	0.286197	0.0657711	0.16248	0.0775787	0.639978	0.820072	0.147918	0.237946	0.506934	0.170651	0.206783	0.406793	9.4765	9.34588	9.52953	9.309	9.20948	9.26179	9.07913	8.88148	8.97638	8.86572
66610	Abi3	ENSMUSG00000018381	-0.125616	0.165116	0.42664	-0.281855	0.0347485	0.11026	0.100229	0.596709	0.794808	0.252742	0.0771873	0.249147	-0.177653	0.0926072	0.243101	9.13295	9.20818	8.86233	9.02051	8.39574	8.13438	9.03183	9.08061	10.5971	10.7294
320712	Abi3bp	ENSMUSG00000035258	-0.281203	0.725739	NA	-0.532811	0.516894	NA	-0.934929	0.293548	NA	1.00752	0.21431	NA	0.335271	0.696416	NA	1.75797	1.88259	1.74528	1.91753	1.94728	2.12234	2.14894	1.91878	1.91871	1.7845
11350	Abl1	ENSMUSG00000026842	0.0707032	0.448663	0.701043	0.321963	0.0280406	0.0967522	0.229384	0.154669	0.410061	0.338214	0.000448018	0.00518319	0.357915	0.000386047	0.00452289	10.6722	10.6159	10.4725	10.2318	9.90625	9.61917	10.2351	10.1593	10.918	10.6693
11352	Abl2	ENSMUSG00000026596	0.352011	0.0011907	0.0249184	0.565511	2.21346e-05	0.00123753	-0.129449	0.27958	0.554344	-0.0928259	0.35249	0.626524	0.0799127	0.436016	0.641425	10.3817	10.1481	10.661	10.266	10.8583	10.9935	10.6408	10.6604	10.4539	10.3992
226251	Ablim1	ENSMUSG00000025085	0.564237	0.655346	NA	0.570407	0.597846	NA	0.724627	0.482863	NA	0.846209	0.404455	NA	0.471126	0.611825	NA	1.09294	0.975839	1.22635	1.08876	1.39401	1.17751	1.56334	1.22579	1.41813	1.23389
231148	Ablim2	ENSMUSG00000029095	-0.213994	0.427385	0.68397	-0.240729	0.368684	0.516551	-0.227356	0.540116	0.760112	-0.0799476	0.89718	NA	0.0605606	0.875674	0.938726	4.61883	4.75109	4.67446	4.8125	4.32774	4.71692	3.95672	3.75476	4.28733	4.24247
319713	Ablim3	ENSMUSG00000032735	NA	NA	NA	-0.727633	0.836864	NA	NA	NA	NA	NA	NA	NA	-0.735979	0.83502	NA	-2.33292	-2.33332	-2.32715	-2.31472	-2.32379	-2.32366	-2.32143	-2.32039	-2.32619	-2.31322
80908	Abo	ENSMUSG00000015787	-0.708495	0.841097	NA	0.715035	0.83965	NA	NA	NA	NA	NA	NA	NA	NA	NA	NA	-2.3321	-2.3208	-2.31517	-2.32719	-2.32378	-2.32366	-2.32163	-2.32068	-2.32596	-2.32582
109934	Abr	ENSMUSG00000017631	0.126321	0.103055	0.337187	0.330337	0.0132824	0.0638144	0.0107273	0.93899	0.974354	0.1142	0.194595	0.452213	0.164677	0.111087	0.275205	12.8075	12.7225	13.0277	12.793	13.5384	13.629	13.2412	13.065	13.6331	13.517
223513	Abra	ENSMUSG00000042895	0.847591	0.428902	NA	-0.175876	0.945333	NA	-0.526792	0.797325	NA	2.01769	0.44812	NA	-0.911428	0.627748	NA	0.020796	-0.184288	-0.443131	-0.433754	-0.262828	-0.347215	-0.387686	-0.544967	-0.424892	-0.289351
73112	Abracl	ENSMUSG00000078453	0.0383715	0.734865	0.876278	-0.370103	0.034646	0.110048	-0.256057	0.0902903	0.310612	0.0774025	0.341304	0.615253	0.020239	0.842276	0.921483	11.585	11.5531	12.1282	12.33	12.9731	13.0471	13.1148	13.1619	12.7572	12.7389
70681	Abraxas1	ENSMUSG00000035234	-0.0147358	0.894118	0.953262	0.0293279	0.850498	0.904889	0.17304	0.311077	0.586325	0.139469	0.41746	0.682067	0.131375	0.313045	0.524724	7.90002	7.90561	7.36202	7.33036	7.51199	7.42128	7.30852	7.2099	7.59426	7.50524
109359	Abraxas2	ENSMUSG00000030965	-0.00348218	0.966199	0.985279	-0.0199432	0.836568	0.895024	0.0705507	0.43863	0.691155	-0.105499	0.137213	0.365088	-0.242657	0.000836827	0.00825672	10.7585	10.7544	10.7591	10.754	10.9292	10.9038	10.9069	10.9628	10.8903	11.0479
30946	Abt1	ENSMUSG00000036376	-0.26849	0.0253561	0.159394	-0.512668	0.00510637	0.0374669	-0.227925	0.118078	0.354902	-0.0435409	0.68385	0.860298	-0.345795	0.009947	0.0525018	9.10926	9.27182	8.96379	9.25605	9.3502	9.52931	9.29211	9.29708	9.05907	9.28505
80283	Abtb1	ENSMUSG00000030083	-0.333627	0.00176148	0.03156	-0.418392	0.0202355	0.0803956	-0.241903	0.0441863	0.214763	-0.0124551	0.928883	0.973696	-0.23902	0.0756572	0.212012	9.85178	10.0859	9.40711	9.67553	8.45744	8.67133	8.23772	8.18594	8.81741	8.96986
99382	Abtb2	ENSMUSG00000032724	-0.00100877	0.997827	0.998311	0.277592	0.372096	0.520369	-0.0248925	0.845586	0.934131	-0.500207	3.81239e-06	9.91222e-05	-0.157528	0.327215	0.53943	5.96063	5.95767	6.23399	6.12813	9.75709	9.79814	9.56659	9.92356	8.61034	8.71771
113868	Acaa1a	ENSMUSG00000036138	-0.161829	0.194132	0.464069	-0.407296	0.0180922	0.07537	-0.2041	0.15805	0.414547	-0.0859215	0.206368	0.467197	-0.170568	0.119368	0.288299	11.393	11.4806	11.328	11.552	11.8674	11.8497	12.1389	12.3501	12.25	12.3673
235674	Acaa1b	ENSMUSG00000010651	0.0633939	0.9407	NA	-0.914487	0.401189	NA	0.752197	0.581782	NA	-0.674967	0.486086	NA	0.295667	0.773435	NA	1.29443	1.33034	1.00724	1.22797	1.12115	0.998682	1.25197	1.46867	1.22061	1.13692
52538	Acaa2	ENSMUSG00000036880	-0.0723281	0.530931	0.755377	-0.112016	0.42584	0.570044	-0.150313	0.100153	0.328931	-0.293878	0.019275	0.0953517	-0.200532	0.183057	0.378915	10.127	10.1615	10.083	10.1345	9.99715	10.1065	9.93133	10.114	9.60909	9.72802
107476	Acaca	ENSMUSG00000020532	0.150314	0.249287	0.524287	0.186118	0.209918	0.350506	0.0630702	0.634998	0.817654	0.299191	0.0140967	0.0762025	0.615777	1.71173e-08	1.10299e-06	8.30462	8.20614	8.50826	8.36775	8.45656	8.34499	8.57405	8.46015	9.05574	8.62914
100705	Acacb	ENSMUSG00000042010	0.722377	0.102049	0.335302	1.13747	0.0115152	0.0589843	0.297166	0.534367	0.756233	0.0456283	0.932171	0.974673	1.39786	0.0229874	0.0930627	4.39881	4.03827	4.63525	4.00539	4.00811	3.85024	3.79294	3.86613	4.00783	3.42181
71985	Acad10	ENSMUSG00000029456	0.32541	0.0489823	0.227786	0.279253	0.148718	0.27766	0.389227	0.131742	0.376559	0.269975	0.216145	0.478343	0.315503	0.176192	0.369071	6.96989	6.74575	6.67938	6.48802	6.52019	6.32523	6.41152	6.22375	6.38032	6.19301
102632	Acad11	ENSMUSG00000090150	0.0498474	0.605397	0.806538	0.0710624	0.690526	0.791552	-0.101818	0.47077	0.714897	-0.00889721	0.958455	0.984973	0.16547	0.193751	0.391643	8.25368	8.21451	8.25525	8.17331	7.74897	7.84827	7.7248	7.70105	8.21559	8.09797
338350	Acad12	ENSMUSG00000042647	-0.118482	0.461693	0.711154	-0.179655	0.359612	0.508183	-0.234653	0.339551	0.611209	0.434275	0.209432	0.470728	0.13289	0.499294	0.695168	6.74775	6.82491	6.38687	6.49037	5.5627	5.76489	5.53515	5.24794	6.2616	6.16481
66948	Acad8	ENSMUSG00000031969	-0.0926599	0.257557	0.532077	-0.182784	0.105307	0.220426	0.0254502	0.829061	0.926799	0.0999304	0.369966	0.641572	0.0493463	0.679422	0.82313	9.59356	9.64965	9.28365	9.38865	9.12404	9.09878	9.17707	9.13158	9.2779	9.24487
229211	Acad9	ENSMUSG00000027710	-0.0403672	0.687782	0.854017	0.0889072	0.360724	0.509384	0.213373	0.0247298	0.159689	0.0261364	0.786202	0.909825	-0.0720792	0.4496	0.653263	9.13589	9.15413	9.04942	8.97478	9.27738	9.16012	9.32319	9.29217	9.14753	9.18978
11363	Acadl	ENSMUSG00000026003	0.0426356	0.616932	0.813678	-0.0408156	0.637443	0.751048	-0.0011931	0.988773	0.995884	-0.0472182	0.56629	0.785677	-0.0839279	0.319955	0.532301	11.0395	11.0064	11.1418	11.1495	11.4864	11.3993	11.5406	11.6681	11.2895	11.3409
11364	Acadm	ENSMUSG00000062908	0.108519	0.100267	0.332037	-0.0160682	0.823168	0.886058	0.0660569	0.435601	0.689459	0.300672	0.00713496	0.0457009	0.263122	0.0101351	0.0531945	10.8644	10.7826	10.7831	10.7749	10.3335	10.3986	10.0519	9.76722	10.172	9.99981
11409	Acads	ENSMUSG00000029545	-0.19287	0.139643	0.391389	-0.351509	0.0582412	0.150939	-0.202834	0.0451309	0.217274	-0.0303505	0.796343	0.914171	-0.153561	0.19436	0.392334	9.88073	9.99065	9.69566	9.89106	9.42278	9.55898	9.35905	9.37433	9.57117	9.67054
66885	Acadsb	ENSMUSG00000030861	0.00253116	0.976002	0.989952	0.0394574	0.62953	0.744922	0.0212977	0.867085	0.942668	0.153547	0.0357682	0.148808	0.0825691	0.38631	0.596534	10.0696	10.0611	10.1531	10.1099	10.301	10.1489	10.4746	10.5162	10.6255	10.5679
11370	Acadvl	ENSMUSG00000018574	-0.173486	0.060348	0.253338	-0.321343	0.00979993	0.0541296	-0.181674	0.0757804	0.286325	-0.0143537	0.871023	0.948203	-0.121081	0.176213	0.369071	10.9933	11.0994	10.9567	11.148	10.9023	11.055	10.867	10.8522	10.8546	10.9315
11595	Acan	ENSMUSG00000030607	NA	NA	NA	0.473598	0.890493	NA	NA	NA	NA	NA	NA	NA	NA	NA	NA	-2.26629	-2.26685	-2.22232	-2.24079	-2.2535	-2.25331	-2.25018	-2.24873	-2.25685	-2.25663
216859	Acap1	ENSMUSG00000001588	-0.16452	0.361419	0.63108	-0.193012	0.306514	0.455258	-0.227509	0.317009	0.591359	-0.0231577	0.961564	0.986182	-0.0353931	0.94752	0.973979	7.06565	7.16728	6.98047	7.08946	5.95754	6.50154	5.1928	4.83504	4.63833	4.66641
78618	Acap2	ENSMUSG00000049076	0.23922	0.0396124	0.201359	0.451504	0.0192684	0.0780335	0.203261	0.182145	0.445044	0.0240013	0.820491	0.926126	0.312439	0.00747696	0.0428264	11.4778	11.3099	11.6725	11.3404	11.562	11.4021	11.6312	11.6458	11.7782	11.5688
140500	Acap3	ENSMUSG00000029033	0.0219876	0.792651	0.908759	0.0560006	0.536509	0.66785	0.382402	0.0046765	0.0603941	-0.0296871	0.814938	0.923308	-0.155206	0.213332	0.414364	9.49749	9.47617	9.07144	9.01443	8.57593	8.41831	8.45382	8.39456	8.75662	8.84895
110446	Acat1	ENSMUSG00000032047	0.203326	0.00658249	0.0750766	0.13642	0.1922	0.329876	0.250444	0.00452284	0.058942	0.557173	1.71862e-07	7.04518e-06	0.65571	1.52396e-10	1.76209e-08	10.4767	10.3332	10.4716	10.3595	10.3556	10.2139	10.3294	9.95188	10.3394	9.90942
110460	Acat2	ENSMUSG00000023832	-0.0321564	0.779994	0.901217	-0.210367	0.190993	0.328586	0.0215692	0.89111	0.95328	0.322737	0.0157753	0.0826256	0.198723	0.175004	0.367803	8.7917	8.8067	8.84175	8.94875	9.36464	9.12717	9.96808	9.96684	10.5657	10.4076
224530	Acat3	ENSMUSG00000062480	0.0505336	0.936486	NA	0.264709	0.588981	NA	0.363637	0.246079	0.519307	0.0221999	0.922651	0.970893	-0.116892	0.667477	0.81601	3.46078	3.43556	3.90229	3.76564	5.35278	5.07074	5.6373	5.62154	5.01758	5.09935
170760	Acbd3	ENSMUSG00000026499	0.13633	0.0847703	0.303681	0.209999	0.100801	0.214371	0.0851589	0.438762	0.691185	0.0393032	0.596816	0.806643	-0.0594271	0.505234	0.699737	10.773	10.6822	11.0194	10.8666	11.4704	11.3199	11.6084	11.6803	11.3318	11.3696
67131	Acbd4	ENSMUSG00000056938	-0.290474	0.0151929	0.122743	-0.499749	0.0127116	0.0624511	-0.0591903	0.70037	0.85454	0.161375	0.3229	0.598137	-0.132572	0.290825	0.501896	7.84501	8.03033	7.37879	7.6729	7.42269	7.38232	7.62394	7.60897	8.14595	8.23763
74159	Acbd5	ENSMUSG00000026781	0.164009	0.0928491	0.318344	0.23349	0.152827	0.28303	0.0920765	0.553272	0.769044	0.069956	0.439062	0.698825	0.118744	0.21151	0.412484	10.9445	10.8248	11.0366	10.8514	10.7829	10.7767	10.7135	10.6088	10.5928	10.5147
72482	Acbd6	ENSMUSG00000033701	-0.232933	0.0249567	0.157959	-0.473576	0.0102902	0.0554254	-0.185183	0.207484	0.475507	-0.0480814	0.631957	0.828057	-0.20879	0.0688001	0.199203	9.90301	10.0482	9.87096	10.1591	9.84482	9.96976	9.75929	9.80038	9.6542	9.78771
78245	Acbd7	ENSMUSG00000026644	-1.67299	0.433424	NA	-1.06941	0.642301	NA	1.32687	0.707128	NA	0.767352	0.828094	NA	0.706689	0.841496	NA	-1.53864	-1.38493	-1.51345	-1.35944	-1.44286	-1.5541	-1.48844	-1.53982	-1.50922	-1.56447
329470	Accs	ENSMUSG00000040272	-0.200482	0.107322	0.343748	-0.134794	0.292758	0.441729	-0.0648319	0.752923	0.884021	0.261163	0.249801	0.520775	0.446857	0.0279167	0.106724	7.92406	8.0581	7.59484	7.67067	6.96343	7.09865	6.68216	6.43372	6.81311	6.54068
381411	Accsl	ENSMUSG00000075023	-0.474346	0.881568	NA	-1.67411	0.289823	NA	1.14896	0.308744	NA	-0.540995	0.357534	0.631071	-0.293445	0.811325	NA	0.617264	0.663561	0.747294	0.983003	1.63244	1.0326	1.71871	2.34729	1.05493	1.21039
497652	Acd	ENSMUSG00000038000	-0.0784227	0.364438	0.633999	-0.21665	0.0708995	0.169939	-0.0777628	0.467722	0.712532	0.0560787	0.621952	0.821433	-0.131857	0.281201	0.491804	9.51723	9.56276	9.41011	9.53655	9.05232	9.15961	9.05293	8.97055	9.1682	9.25202
11421	Ace	ENSMUSG00000020681	0.251021	0.705311	NA	-0.325857	0.542714	NA	0.0552494	0.937381	NA	0.894784	0.343582	NA	-1.09576	0.228519	NA	2.34512	2.1842	2.46474	2.60918	2.24658	2.3754	2.46129	1.95874	1.82189	2.18187
70008	Ace2	ENSMUSG00000015405	0.0223353	0.994954	NA	0.877261	0.623465	NA	-0.111469	0.974824	NA	0.767352	0.828094	NA	NA	NA	NA	-1.70547	-1.70703	-1.53339	-1.63461	-1.66993	-1.66939	-1.66071	-1.70653	-1.72911	-1.72851
171168	Acer1	ENSMUSG00000045019	NA	NA	NA	-1.28857	0.713768	NA	-0.103368	0.960535	NA	NA	NA	NA	NA	NA	NA	-1.94558	-1.94687	-1.92693	-1.84538	-1.79191	-1.79146	-1.90843	-1.90507	-1.92381	-1.92331
230379	Acer2	ENSMUSG00000038007	-0.143638	0.711514	0.864915	0.502286	0.132257	0.256461	0.305795	0.452389	0.701318	-0.268127	0.728919	NA	0.729568	0.302399	NA	3.48957	3.567	4.21123	3.85571	3.54143	3.64971	3.25239	3.02775	3.11317	2.79323
66190	Acer3	ENSMUSG00000030760	0.0259546	0.694965	0.85659	-0.0460587	0.564103	0.690559	-0.173073	0.129869	0.374102	-0.153568	0.115613	0.328438	0.193721	0.0130883	0.0632284	11.2887	11.2657	11.5021	11.5145	11.2739	11.244	11.5163	11.7688	10.9918	10.8665
11423	Ache	ENSMUSG00000023328	0.0121097	0.991744	NA	-0.836324	0.608954	NA	-1.96295	0.151376	NA	-0.294982	0.810329	NA	-0.252842	0.849992	NA	0.627252	0.676077	0.454252	0.5295	0.559458	0.889907	0.590063	0.811644	0.569552	0.673938
56215	Acin1	ENSMUSG00000022185	-0.0713086	0.362847	0.632444	-0.10152	0.20005	0.33873	-0.0781506	0.529804	0.753391	-0.00405281	0.95099	0.9823	-0.113741	0.208484	0.409052	12.2877	12.3263	12.3325	12.381	12.4624	12.4211	12.627	12.7271	12.5122	12.5823
13349	Ackr1	ENSMUSG00000037872	-0.708495	0.841097	NA	NA	NA	NA	NA	NA	NA	-0.675316	0.848446	NA	NA	NA	NA	-2.33346	-2.32033	-2.32735	-2.32776	-2.3238	-2.32365	-2.32129	-2.30664	-2.32633	-2.32617
59289	Ackr2	ENSMUSG00000044534	-1.30622	0.612343	NA	0.745661	0.787608	NA	NA	NA	NA	NA	NA	NA	1.26972	0.717676	NA	-1.83592	-1.75568	-1.77681	-1.81877	-1.84763	-1.84719	-1.8401	-1.83679	-1.77373	-1.85475
12778	Ackr3	ENSMUSG00000044337	NA	NA	NA	-0.727633	0.836864	NA	NA	NA	NA	NA	NA	NA	NA	NA	NA	-2.39983	-2.40003	-2.39692	-2.39064	-2.39522	-2.39515	-2.39402	-2.3935	-2.39643	-2.39635
252837	Ackr4	ENSMUSG00000079355	0.780177	0.402671	NA	2.8925	0.0558711	NA	0.992527	0.584504	NA	0.37093	0.808814	NA	-0.17536	0.843003	NA	0.967435	0.724074	0.827277	0.355896	0.52674	0.458639	0.779471	0.623448	0.992873	1.04291
104112	Acly	ENSMUSG00000020917	0.0330706	0.649156	0.831106	0.148989	0.101607	0.215233	0.0132556	0.903832	0.958599	0.12039	0.0982938	0.293802	0.25714	0.0125986	0.0614146	11.9714	11.9445	12.0678	11.9542	12.1367	12.0524	12.3046	12.3053	12.7066	12.523
266645	Acmsd	ENSMUSG00000026348	0.0223353	0.994954	NA	NA	NA	NA	1.3767	0.696391	NA	NA	NA	NA	NA	NA	NA	-2.17763	-2.17834	-2.1901	-2.19077	-2.16147	-2.18391	-2.15727	-2.17812	-2.18839	-2.18811
230161	Acnat1	ENSMUSG00000070985	0.734173	0.835418	NA	0.241486	0.925189	NA	0.716112	0.741946	NA	0.561008	0.833777	NA	-1.24106	0.627224	NA	-1.34208	-1.41011	-1.24657	-1.25825	-1.22845	-1.22773	-1.15515	-1.27747	-1.30772	-1.17894
209186	Acnat2	ENSMUSG00000060317	-0.0054032	0.998779	NA	NA	NA	NA	-0.819222	0.816674	NA	NA	NA	NA	NA	NA	NA	-2.24833	-2.2489	-2.25823	-2.25876	-2.25351	-2.2353	-2.25018	-2.24872	-2.25687	-2.25665
11428	Aco1	ENSMUSG00000028405	0.271275	0.000339776	0.010553	0.320944	0.00125197	0.0176591	0.285395	0.009523	0.0921666	0.321173	0.000762114	0.00790927	0.313074	0.000979376	0.00935663	10.7592	10.5747	10.7614	10.5316	10.6826	10.5026	10.7165	10.5077	10.9342	10.7183
11429	Aco2	ENSMUSG00000022477	0.00260406	0.972004	0.987948	0.000626659	0.993201	0.996265	-0.0477577	0.542847	0.762401	-0.103419	0.141547	0.371772	-0.0367229	0.606719	0.775928	11.7092	11.7003	11.7782	11.7592	11.873	11.8743	11.9032	12.0125	11.9314	11.9517
16365	Acod1	ENSMUSG00000022126	0.47538	0.0470807	0.223076	0.289018	0.0367758	0.114182	-0.0822635	0.40333	0.663863	-0.176851	0.0281434	0.12572	-0.334135	0.00295705	0.0215234	13.2567	13.2357	15.6403	15.4358	17.0198	16.9263	17.2456	17.5403	16.7244	16.9647
26897	Acot1	ENSMUSG00000072949	0.195816	0.269284	0.544527	0.0517412	0.802976	0.871154	-0.349561	0.31845	0.59232	-1.15958	0.368518	NA	1.96887	0.533149	NA	5.72948	5.58132	5.52882	5.4652	4.0431	4.73019	3.39076	3.13054	2.78185	2.66129
64833	Acot10	ENSMUSG00000047565	1.02612	0.18539	NA	0.532121	0.53301	NA	0.0981316	0.854441	NA	-0.0484401	0.918244	0.969485	-0.596316	0.269052	0.47909	2.5249	2.17612	2.65177	2.38531	3.05439	3.04236	3.38456	3.39	2.84232	3.12464
329910	Acot11	ENSMUSG00000034853	0.243879	0.0347822	0.187937	0.324214	0.0107245	0.0568346	0.137343	0.404721	0.664226	0.111163	0.452839	0.70912	0.242244	0.119934	0.289357	8.49614	8.32075	8.30618	8.07185	8.06812	8.0279	7.96628	7.84685	8.30151	8.13468
74156	Acot12	ENSMUSG00000021620	NA	NA	NA	NA	NA	NA	NA	NA	NA	NA	NA	NA	NA	NA	NA	0	0	0	0	0	0	0	0	0	0
66834	Acot13	ENSMUSG00000006717	-0.263841	0.0998193	0.331109	-0.482918	0.0483444	0.134507	-0.346224	0.0278861	0.169919	-0.0651369	0.703961	0.868999	-0.0887085	0.683758	0.825877	9.0823	9.23785	9.07076	9.34743	8.47256	8.90607	8.09587	7.94013	8.02018	8.08635
171210	Acot2	ENSMUSG00000021226	0.0127475	0.918947	0.964409	-0.151487	0.246954	0.391954	0.192774	0.440858	0.692072	0.0644368	0.909322	0.965389	0.318626	0.416884	0.625251	7.37268	7.35197	7.14623	7.23507	5.40947	5.61522	4.94835	4.59971	5.05297	4.89303
171281	Acot3	ENSMUSG00000021228	NA	NA	NA	NA	NA	NA	NA	NA	NA	NA	NA	NA	NA	NA	NA	0	0	0	0	0	0	0	0	0	0
171282	Acot4	ENSMUSG00000052392	0.650111	0.266455	NA	-0.142976	0.838103	NA	1.83209	0.284029	NA	NA	NA	NA	NA	NA	NA	1.81849	1.48965	1.40071	1.42866	0.67275	0.61445	0.70658	0.494878	0.447424	0.448698
217698	Acot5	ENSMUSG00000042540	NA	NA	NA	NA	NA	NA	NA	NA	NA	NA	NA	NA	NA	NA	NA	0	0	0	0	0	0	0	0	0	0
217700	Acot6	ENSMUSG00000043487	0.486916	0.514714	NA	1.2389	0.181762	NA	0.67058	0.759055	NA	0.773508	0.775227	NA	-0.61664	0.697983	NA	1.11362	0.939434	1.21128	0.715875	0.386493	0.403551	0.496578	0.357958	0.451043	0.566702
70025	Acot7	ENSMUSG00000028937	-0.257355	0.0087601	0.0886689	-0.37116	0.0230254	0.0857192	-0.203388	0.0722281	0.279308	-0.124463	0.173518	0.422393	-0.337349	0.00192295	0.0154686	10.803	10.9602	10.8878	11.0984	11.3026	11.4224	11.3301	11.4445	11.0441	11.2663
170789	Acot8	ENSMUSG00000017307	-0.232704	0.0350285	0.188705	-0.552805	0.000520851	0.0110388	-0.288425	0.0609163	0.257325	-0.0639372	0.581471	0.797116	-0.167267	0.124008	0.295385	8.86627	9.01147	8.56717	8.89556	8.77262	8.88988	8.92691	9.03801	9.18918	9.30113
56360	Acot9	ENSMUSG00000025287	0.0169265	0.882942	0.947538	-0.0273607	0.783608	0.858204	-0.0695593	0.431489	0.686383	-0.0601009	0.37739	0.648747	-0.189397	0.0329523	0.119449	10.1383	10.117	10.4674	10.4656	11.1701	11.1394	11.2391	11.3696	10.671	10.7941
11430	Acox1	ENSMUSG00000020777	0.071189	0.395782	0.659619	0.156855	0.11036	0.227457	-0.0632702	0.645844	0.823439	0.142475	0.0668535	0.226429	0.0667686	0.390454	0.600236	10.7044	10.6498	10.7244	10.5991	10.4514	10.4378	10.5284	10.491	10.8097	10.7607
93732	Acox2	ENSMUSG00000021751	NA	NA	NA	NA	NA	NA	0.623446	0.859961	NA	NA	NA	NA	NA	NA	NA	-2.39996	-2.40017	-2.39695	-2.39715	-2.38853	-2.39513	-2.39397	-2.39343	-2.39645	-2.39637
80911	Acox3	ENSMUSG00000029098	0.130625	0.138701	0.390323	0.217027	0.0685329	0.166569	-0.0402991	0.763525	0.890462	-0.314596	0.0148674	0.0793227	0.166914	0.118641	0.287427	11.0838	10.9823	11.0721	10.8954	10.1582	10.4343	9.70123	9.63302	9.95129	9.84181
74121	Acoxl	ENSMUSG00000027380	-0.541175	0.433403	NA	0.397996	0.45475	NA	0.208563	0.673115	NA	0.204151	0.683129	0.860121	0.0468294	0.893371	0.947598	2.67456	2.86271	3.35078	3.12617	3.54779	3.35588	3.56211	3.532	4.24368	4.18681
11431	Acp1	ENSMUSG00000044573	-0.0486836	0.626862	0.819241	-0.256859	0.0267199	0.0936651	-0.13485	0.273325	0.548332	0.0683096	0.523949	0.75833	-0.0566228	0.614779	0.781133	8.9529	8.97686	8.91373	9.06377	8.89904	8.99298	8.93336	8.89471	8.8767	8.90827
11432	Acp2	ENSMUSG00000002103	-0.145416	0.0443116	0.215832	-0.109388	0.123222	0.245254	-0.117944	0.128981	0.37225	0.00472117	0.955429	0.98404	-0.103397	0.212006	0.413048	12.3022	12.386	12.5301	12.5822	12.7199	12.6358	13.0342	13.2011	13.5064	13.5761
100503991	Acp4	ENSMUSG00000012777	-0.708495	0.841097	NA	NA	NA	NA	0.623446	0.859961	NA	NA	NA	NA	NA	NA	NA	-2.33208	-2.3208	-2.32684	-2.32718	-2.31214	-2.32366	-2.32163	-2.32069	-2.32596	-2.32582
11433	Acp5	ENSMUSG00000001348	0.836972	4.72659e-06	0.000387367	0.388578	0.00483455	0.0365133	0.273157	0.0548281	0.242463	0.600077	3.23925e-06	8.89202e-05	0.691825	2.85544e-11	3.83994e-09	7.70351	7.26315	8.15036	7.90518	9.48891	9.23977	9.43379	9.06985	9.53182	9.04377
66659	Acp6	ENSMUSG00000028093	-0.117337	0.16614	0.428263	-0.136736	0.17791	0.313454	0.0485117	0.720912	0.866515	0.259435	0.292751	0.567416	0.442722	0.00200411	0.0159029	8.59258	8.669	8.5092	8.58496	7.78389	7.99475	7.29884	6.92864	7.6673	7.39247
101744	Acp7	ENSMUSG00000037469	NA	NA	NA	NA	NA	NA	NA	NA	NA	NA	NA	NA	NA	NA	NA	0	0	0	0	0	0	0	0	0	0
56318	Acpp	ENSMUSG00000032561	0.473075	0.105819	0.341866	0.760612	0.0327745	0.106336	0.714149	0.0511037	0.232449	1.3983	1.78988e-08	9.9153e-07	2.15326	4.47956e-16	1.59369e-13	5.32652	5.05233	5.17735	4.72935	5.68342	4.8468	6.30872	5.783	7.42288	5.87713
11434	Acr	ENSMUSG00000022622	NA	NA	NA	NA	NA	NA	NA	NA	NA	NA	NA	NA	NA	NA	NA	0	0	0	0	0	0	0	0	0	0
54137	Acrbp	ENSMUSG00000072770	0.046687	0.693165	0.856107	0.0182578	0.919857	0.95077	0.434527	0.119978	0.357878	0.255721	0.229185	0.494247	-0.00528909	0.977249	0.989577	7.79848	7.75461	6.73894	6.70458	6.28116	5.83868	6.63986	6.6954	6.95539	6.95401
11451	Acrv1	ENSMUSG00000032110	NA	NA	NA	0.715035	0.83965	NA	NA	NA	NA	NA	NA	NA	NA	NA	NA	-2.39982	-2.40003	-2.39046	-2.39711	-2.39522	-2.39515	-2.39403	-2.3935	-2.39643	-2.39635
94180	Acsbg1	ENSMUSG00000032281	0.0287514	0.932959	0.970259	-0.0302726	0.930671	0.957643	0.0017136	0.997512	NA	-0.125714	0.908182	NA	1.37613	0.00479426	0.0307648	4.23773	4.25105	4.10972	4.14403	3.29107	3.45094	2.94584	2.81	3.88711	3.16371
328845	Acsbg2	ENSMUSG00000024207	NA	NA	NA	NA	NA	NA	NA	NA	NA	NA	NA	NA	0.706689	0.841496	NA	-2.40053	-2.40077	-2.39711	-2.39733	-2.39512	-2.39504	-2.39372	-2.3931	-2.38895	-2.39645
264895	Acsf2	ENSMUSG00000076435	-0.282802	0.175226	0.440789	-0.0308609	0.915341	0.94791	-0.245076	0.426017	0.6824	-0.40206	0.24911	0.520128	0.277214	0.401977	0.612389	6.03923	6.21016	5.94986	5.92822	5.32505	5.5386	5.01212	5.15083	5.0754	4.92732
257633	Acsf3	ENSMUSG00000015016	-0.122128	0.218951	0.493582	-0.172053	0.199212	0.337511	-0.0648145	0.687296	0.846613	-0.0183471	0.898257	0.961089	-0.248915	0.0323956	0.118404	8.16713	8.24171	8.11063	8.20212	7.85718	7.91804	7.92507	7.9229	7.93802	8.0961
14081	Acsl1	ENSMUSG00000018796	0.122993	0.184901	0.451779	0.448053	0.0108078	0.0570201	0.491512	0.00316235	0.0472199	0.31695	2.00144e-07	8.04368e-06	0.24965	0.0186353	0.0803301	11.1764	11.1147	11.8871	11.6089	13.2902	12.7554	13.6892	13.651	14.1663	13.9802
74205	Acsl3	ENSMUSG00000032883	0.0826083	0.365188	0.634607	0.214496	0.171338	0.305711	0.263051	0.0841259	0.30151	0.636821	1.21051e-06	3.9176e-05	0.611955	2.56536e-05	0.000505393	9.98571	9.92153	9.94829	9.77757	9.0456	8.83194	9.23935	8.9097	9.89251	9.46146
50790	Acsl4	ENSMUSG00000031278	0.153112	0.0471285	0.223096	0.261935	0.0700102	0.168789	0.089925	0.537374	0.758913	0.212257	0.00719678	0.0459353	0.311498	0.00275454	0.0202973	11.79	11.6899	12.0946	11.9016	12.2936	12.0722	12.5972	12.6137	12.7779	12.5601
433256	Acsl5	ENSMUSG00000024981	-0.0911624	0.332174	0.604182	-0.0840759	0.329425	0.479141	-0.0546003	0.511618	0.743212	0.0314943	0.659417	0.846048	-0.142109	0.0598309	0.181785	12.5512	12.5961	12.8739	12.908	13.5985	13.4539	13.9481	14.1156	14.103	14.1986
216739	Acsl6	ENSMUSG00000020333	-0.708495	0.841097	NA	NA	NA	NA	NA	NA	NA	NA	NA	NA	NA	NA	NA	-2.39915	-2.39394	-2.39673	-2.39689	-2.39532	-2.39526	-2.39432	-2.39389	-2.39632	-2.39626
117147	Acsm1	ENSMUSG00000033533	NA	NA	NA	NA	NA	NA	NA	NA	NA	NA	NA	NA	NA	NA	NA	0	0	0	0	0	0	0	0	0	0
233799	Acsm2	ENSMUSG00000030945	NA	NA	NA	NA	NA	NA	NA	NA	NA	NA	NA	NA	NA	NA	NA	0	0	0	0	0	0	0	0	0	0
20216	Acsm3	ENSMUSG00000030935	1.02009	0.232859	NA	0.527433	0.59345	NA	-0.190039	0.908466	NA	1.25949	0.577457	NA	0.409741	0.77378	NA	0.949371	0.594582	0.743457	0.580064	0.31629	0.506836	0.550073	0.279955	0.568115	0.471103
233801	Acsm4	ENSMUSG00000047026	-1.44807	0.681728	NA	NA	NA	NA	-0.819222	0.816674	NA	NA	NA	NA	NA	NA	NA	-2.26595	-2.23143	-2.25805	-2.25857	-2.25346	-2.23573	-2.25021	-2.24879	-2.25673	-2.25652
272428	Acsm5	ENSMUSG00000030972	NA	NA	NA	NA	NA	NA	NA	NA	NA	NA	NA	NA	NA	NA	NA	0	0	0	0	0	0	0	0	0	0
68738	Acss1	ENSMUSG00000027452	0.389886	0.00341477	0.0493635	0.653686	0.000164785	0.0052787	0.229016	0.344665	0.615708	-0.43347	0.0292772	0.129196	0.283394	0.0741828	0.209541	8.2345	7.96768	8.18203	7.71065	7.36582	7.22525	7.36543	7.65972	7.75395	7.56593
60525	Acss2	ENSMUSG00000027605	-0.0555974	0.75032	0.885629	0.23942	0.24095	0.385361	-0.0165216	0.943136	0.975478	0.427443	0.00101633	0.00991966	0.726747	1.43271e-06	4.71421e-05	7.28184	7.30119	7.28073	7.11102	7.23662	6.93028	7.77542	7.79399	8.84285	8.30455
74945	Acss2os	NA	0.544305	0.804332	NA	0.00576083	0.998698	NA	-2.17241	0.237485	NA	1.64313	0.323836	NA	-0.654868	0.592446	NA	-0.445232	-0.49973	-0.530527	-0.533822	-0.367793	-0.220006	-0.268156	-0.415243	-0.247945	-0.0977775
380660	Acss3	ENSMUSG00000035948	NA	NA	NA	NA	NA	NA	-1.56211	0.658106	NA	NA	NA	NA	NA	NA	NA	-2.33455	-2.33502	-2.32776	-2.32821	-2.32381	-2.29353	-2.32103	-2.31981	-2.32663	-2.32644
11459	Acta1	ENSMUSG00000031972	-0.103392	0.864896	NA	0.477448	0.584512	NA	-0.679674	0.402181	NA	0.0128858	0.98954	NA	0.220368	0.781905	NA	2.106	2.17313	2.0592	1.88681	1.90918	2.27495	1.92034	1.86099	1.98685	1.91504
11475	Acta2	ENSMUSG00000035783	-0.110678	0.727993	0.872918	-0.611754	0.165678	0.298268	0.313198	0.419598	0.677415	-0.0464256	0.90988	0.965389	0.318261	0.263435	0.472487	4.41279	4.48147	4.00416	4.29647	4.23053	4.1919	4.5472	4.46363	4.89428	4.6921
11461	Actb	ENSMUSG00000029580	-0.136058	0.176838	0.441615	-0.358801	0.00931515	0.0525321	-0.219946	0.0801916	0.295296	-0.163539	0.0481663	0.182767	-0.201888	0.0118806	0.0590785	17.7118	17.7857	17.7319	17.9331	18.2859	18.2608	18.5845	18.8784	18.6024	18.7373
238880	Actbl2	ENSMUSG00000055194	0.734173	0.835418	NA	NA	NA	NA	NA	NA	NA	0.0460239	0.989272	NA	NA	NA	NA	-2.24766	-2.27015	-2.25964	-2.26029	-2.25392	-2.25369	-2.22808	-2.22631	-2.25799	-2.25773
11464	Actc1	ENSMUSG00000068614	0.213189	0.933887	NA	NA	NA	NA	1.72554	0.620998	NA	-0.714896	0.738624	NA	-0.183158	0.942544	NA	-1.32995	-1.343	-1.42801	-1.42998	-1.18538	-1.40981	-1.26486	-1.19278	-1.29615	-1.28883
11465	Actg1	ENSMUSG00000062825	0.222994	0.0371031	0.1946	0.0774575	0.39601	0.542893	0.0356745	0.688723	0.847515	-0.0581814	0.546248	0.772176	-0.171834	0.0576797	0.177251	9.47127	9.32366	9.69182	9.62391	9.88093	9.81647	10.0332	10.1252	9.74559	9.85451
11468	Actg2	ENSMUSG00000059430	1.20183	0.607812	NA	-1.16094	0.516405	NA	-0.0923812	0.961212	NA	1.52377	0.288419	NA	-0.881746	0.516305	NA	-0.204022	-0.311301	-0.270147	-0.119566	-0.0957404	-0.173386	0.136413	-0.148001	-0.116539	0.0607813
70362	Actl10	ENSMUSG00000078129	1.46353	0.187056	NA	1.2653	0.289144	NA	0.623446	0.859961	NA	-1.27229	0.576601	NA	0.963515	0.375524	NA	0.818258	0.334679	0.707701	0.326736	0.129192	0.0513211	0.136729	0.306605	0.758307	0.499354
67722	Actl11	ENSMUSG00000066368	NA	NA	NA	NA	NA	NA	NA	NA	NA	NA	NA	NA	NA	NA	NA	0	0	0	0	0	0	0	0	0	0
56456	Actl6a	ENSMUSG00000027671	0.0437854	0.578069	0.787222	-0.00683303	0.945943	0.967075	0.0762834	0.385829	0.648575	0.139659	0.0772089	0.249151	0.155736	0.0432988	0.144059	10.4949	10.4593	10.5424	10.5278	10.6553	10.6212	10.6468	10.5463	10.4781	10.3732
83766	Actl6b	ENSMUSG00000029712	NA	NA	NA	NA	NA	NA	0.623446	0.859961	NA	-0.675316	0.848446	NA	-0.735979	0.83502	NA	-2.26788	-2.2685	-2.25892	-2.25951	-2.23383	-2.2535	-2.25004	-2.22855	-2.25742	-2.23731
11470	Actl7a	ENSMUSG00000070979	0.756744	0.787913	NA	0.715035	0.83965	NA	NA	NA	NA	0.767352	0.828094	NA	1.26972	0.717676	NA	-1.93571	-1.97188	-1.95498	-1.99109	-1.98086	-1.98048	-1.9393	-1.97153	-1.91726	-1.98698
11471	Actl7b	ENSMUSG00000070980	-0.553758	0.792925	NA	-1.02711	0.508054	NA	-0.0978839	0.977902	NA	-1.67474	0.423928	NA	-0.0577296	0.980276	NA	-0.878481	-0.763377	-0.775346	-0.610909	-0.966205	-0.890896	-0.798304	-0.640568	-0.831759	-0.826461
69481	Actl9	ENSMUSG00000092519	0.886023	0.597125	NA	-1.32438	0.387959	NA	0.623446	0.859961	NA	0.0368776	0.991539	NA	NA	NA	NA	-0.853571	-0.971946	-0.967212	-0.691498	-1.15094	-1.15015	-0.99121	-1.05732	-1.16476	-1.16386
109711	Actn1	ENSMUSG00000015143	0.199975	0.0255766	0.159734	0.295557	0.0150983	0.0685862	0.187127	0.070084	0.276277	0.201603	0.0545035	0.19825	0.537576	2.10908e-07	9.12363e-06	12.5802	12.4449	12.7169	12.5063	13.0956	12.9277	13.024	12.9429	12.6571	12.3083
11472	Actn2	ENSMUSG00000052374	NA	NA	NA	-0.727633	0.836864	NA	NA	NA	NA	NA	NA	NA	-0.00985754	0.997773	NA	-2.26719	-2.26779	-2.25861	-2.24014	-2.25362	-2.25341	-2.2501	-2.24855	-2.23814	-2.2379
11474	Actn3	ENSMUSG00000006457	-0.638685	0.607916	NA	-0.516614	0.701995	NA	0.293572	0.81168	NA	-2.43064	0.360512	NA	-1.07046	0.413058	NA	0.349163	0.494051	0.331457	0.424392	0.352579	0.423	0.22116	0.33466	0.280806	0.51965
60595	Actn4	ENSMUSG00000054808	0.214282	0.0246646	0.157286	0.353616	0.0122561	0.0612607	0.132536	0.360948	0.629863	-0.0745262	0.381984	0.652403	0.0894296	0.308625	0.519568	12.5857	12.4343	12.6861	12.4231	12.4484	12.4425	12.2101	12.1755	12.144	12.0836
56444	Actr10	ENSMUSG00000021076	-0.0998988	0.258136	0.532409	-0.161402	0.0698701	0.168485	-0.101311	0.166282	0.425276	-0.055672	0.418522	0.682895	-0.248563	0.00061386	0.0064801	10.783	10.8388	10.9168	11.0022	11.1866	11.2096	11.2585	11.351	11.0314	11.1928
54130	Actr1a	ENSMUSG00000025228	-0.168863	0.0335466	0.184592	-0.159261	0.0678289	0.165599	-0.0708342	0.360847	0.629841	-0.0846325	0.207677	0.468255	-0.31408	2.78373e-06	8.06563e-05	12.1186	12.2186	12.1084	12.191	12.4815	12.4551	12.5927	12.7347	12.5271	12.7364
226977	Actr1b	ENSMUSG00000037351	0.168092	0.0350971	0.18897	0.224526	0.00407607	0.0338013	0.0476334	0.667957	0.835289	-0.0292731	0.717058	0.877153	0.076876	0.351241	0.564284	10.5954	10.4783	10.8556	10.6866	10.6562	10.7302	10.5091	10.4267	10.5073	10.454
66713	Actr2	ENSMUSG00000020152	0.0845168	0.16566	0.427546	0.10886	0.352381	0.50122	-0.00374702	0.968383	0.987429	-0.101501	0.184794	0.43929	0.031296	0.719579	0.848435	14.1718	14.1138	14.3202	14.2303	14.7283	14.5749	15.0161	15.2529	14.9768	14.9533
74117	Actr3	ENSMUSG00000026341	-0.0292673	0.695208	0.85659	-0.0930715	0.122301	0.244048	-0.127676	0.0743901	0.283157	-0.0764075	0.255608	0.527065	-0.0232104	0.746571	0.864552	13.7396	13.7517	13.9153	13.9574	14.1743	14.1233	14.4498	14.6484	14.311	14.3226
242894	Actr3b	ENSMUSG00000056367	-0.413726	0.343604	0.615563	-0.692844	0.128706	0.25209	-0.676375	0.276548	NA	-0.626363	0.264083	0.536366	-0.227791	0.676491	0.821107	3.2993	3.50927	3.20818	3.59098	3.11249	3.32788	3.07621	3.52263	3.12886	3.22462
109275	Actr5	ENSMUSG00000037761	-0.202244	0.061805	0.256153	-0.307538	0.061014	0.155396	0.0933268	0.512323	0.743738	0.0443661	0.711928	0.873936	-0.180187	0.148704	0.330003	8.65114	8.7749	8.35526	8.526	8.56701	8.48946	8.51211	8.50609	8.56678	8.68417
67019	Actr6	ENSMUSG00000019948	0.0164405	0.87693	0.945721	-0.169365	0.330725	0.480275	-0.00954118	0.955826	0.981522	0.0739517	0.607036	0.812863	-0.136178	0.376508	0.587828	8.27823	8.25879	7.93038	8.01877	7.66817	7.61428	7.62644	7.64774	7.81201	7.89648
56249	Actr8	ENSMUSG00000015971	-0.00377757	0.965537	0.985164	-0.135713	0.298366	0.447268	-0.0422793	0.667045	0.834748	-0.0116604	0.912769	0.966942	-0.0809015	0.400883	0.611331	9.63183	9.62728	9.36086	9.42887	9.08568	9.12704	9.1931	9.1943	9.42963	9.47907
73360	Actrt1	ENSMUSG00000046615	NA	NA	NA	NA	NA	NA	NA	NA	NA	NA	NA	NA	NA	NA	NA	0	0	0	0	0	0	0	0	0	0
73353	Actrt2	ENSMUSG00000051276	NA	NA	NA	NA	NA	NA	NA	NA	NA	NA	NA	NA	NA	NA	NA	0	0	0	0	0	0	0	0	0	0
76652	Actrt3	ENSMUSG00000037737	NA	NA	NA	NA	NA	NA	1.16171	0.740823	NA	NA	NA	NA	NA	NA	NA	-2.33285	-2.33325	-2.32713	-2.3275	-2.29836	-2.32366	-2.32144	-2.32041	-2.32617	-2.32601
11477	Acvr1	ENSMUSG00000026836	0.16397	0.114335	0.354154	0.186816	0.320235	0.469932	0.00568231	0.964606	0.98572	-0.102253	0.31705	0.591087	0.379683	0.00159795	0.013504	9.07621	8.9661	9.12021	8.97074	9.81442	9.77443	9.75485	9.86632	9.30136	9.0543
11479	Acvr1b	ENSMUSG00000000532	0.185149	0.141845	0.394537	0.573755	0.0183888	0.0760294	0.620181	0.00163902	0.0309635	0.384716	3.34514e-06	9.06134e-05	0.34063	0.0162665	0.0734077	9.55771	9.43609	9.21223	8.88297	10.8543	10.2777	11.1165	10.9793	11.0942	10.8563
269275	Acvr1c	ENSMUSG00000026834	-0.639777	0.843541	NA	-0.765534	0.660805	NA	-0.907594	0.712071	NA	0.78903	0.769597	NA	-0.859266	0.728011	NA	-1.14754	-1.09026	-0.987684	-0.916153	-1.02131	-0.957155	-1.08104	-1.07509	-1.11064	-0.977567
11480	Acvr2a	ENSMUSG00000052155	0.224663	0.131276	0.379864	0.680354	0.00243005	0.0253131	0.665372	0.000899046	0.0207872	0.067637	0.503944	0.744356	0.2062	0.205519	0.405523	8.61565	8.46293	9.47849	8.97518	9.42992	9.11291	9.12612	8.92634	8.72895	8.59739
11481	Acvr2b	ENSMUSG00000061393	-0.258343	0.337974	0.61112	-0.203081	0.505052	0.641803	0.24025	0.454004	0.702646	-0.695987	0.185098	0.439617	0.184514	0.664271	0.813457	5.32799	5.49686	5.25069	5.35316	4.68223	4.7607	4.17687	4.25441	4.4685	4.34773
11482	Acvrl1	ENSMUSG00000000530	-0.0973633	0.309408	0.584443	-0.240778	0.0127096	0.0624511	-0.104496	0.428353	0.683313	0.205542	0.0482628	0.182953	0.029678	0.793032	0.892676	10.0214	10.0756	9.8971	10.0313	9.89672	9.7694	10.3341	10.3973	11.1233	11.0973
109652	Acy1	ENSMUSG00000023262	0.0251794	0.918211	0.964209	-0.0693657	0.833268	0.893146	0.247859	0.299468	0.57501	0.236148	0.46533	0.719086	0.185266	0.475273	0.676077	5.37476	5.34618	5.33091	5.33821	5.5126	5.50506	5.32921	5.04131	5.5167	5.40674
71670	Acy3	ENSMUSG00000024866	-0.699763	0.117044	0.359137	-0.499742	0.363969	NA	-0.737164	0.228227	NA	1.44183	0.177158	NA	-0.303393	0.656693	NA	2.82177	3.18856	2.86524	3.04952	2.63053	2.97843	2.50184	2.11027	2.53506	2.64979
66204	Acyp1	ENSMUSG00000008822	-0.174254	0.239352	0.514516	-0.576193	0.0287881	0.0982613	-0.497487	0.0250162	0.160687	0.026478	0.903389	0.962733	0.222968	0.350875	0.56427	7.25029	7.35381	7.14195	7.48477	6.77756	7.18298	6.51771	6.42072	6.36724	6.24522
75572	Acyp2	ENSMUSG00000060923	-0.0989356	0.628239	0.820107	-0.464173	0.0943766	0.205556	-0.419043	0.0663331	0.267706	-0.277837	0.120945	0.337434	-0.491426	0.00641694	0.0383899	5.95493	6.01188	6.04879	6.30118	6.01736	6.06862	6.39552	6.78824	6.3261	6.65076
11486	Ada	ENSMUSG00000017697	0.231764	0.0817984	0.298931	0.0447454	0.820637	0.884155	0.0263423	0.869043	0.9434	0.0550763	0.823268	0.92719	0.58707	0.0368282	0.128421	7.13537	6.96853	7.09292	7.03661	6.72453	6.82686	6.38818	6.22886	6.08961	5.75841
21744	Adad1	ENSMUSG00000027719	NA	NA	NA	NA	NA	NA	0.623446	0.859961	NA	NA	NA	NA	NA	NA	NA	-2.40099	-2.40125	-2.39724	-2.39748	-2.38673	-2.39496	-2.39351	-2.39284	-2.39661	-2.39651
75773	Adad2	ENSMUSG00000024266	NA	NA	NA	NA	NA	NA	NA	NA	NA	NA	NA	NA	-0.735979	0.83502	NA	-2.39995	-2.40016	-2.39695	-2.39715	-2.3952	-2.39513	-2.39397	-2.39343	-2.39645	-2.38971
75894	Adal	ENSMUSG00000027259	0.103632	0.458226	0.707358	0.289273	0.164994	0.297398	0.363757	0.0859618	0.303994	0.0675969	0.74226	0.890307	0.121453	0.481243	0.680527	7.05195	6.97178	6.72368	6.53664	6.45725	6.19922	6.42472	6.43513	6.90056	6.80821
11487	Adam10	ENSMUSG00000054693	0.202184	0.163697	0.424691	0.615691	0.0254018	0.0912928	0.269313	0.265341	0.54089	0.146528	0.204783	0.465561	0.603535	0.000314072	0.00384343	10.7545	10.6113	11.0441	10.5776	10.9244	10.6702	10.8816	10.8291	11.1149	10.7163
11488	Adam11	ENSMUSG00000020926	-0.646403	0.511259	NA	1.05313	0.273356	NA	-1.03664	0.570438	NA	-0.588869	0.829064	NA	0.83722	0.563259	NA	0.539957	0.743131	0.87268	0.519626	0.471204	0.444939	0.144677	0.302631	0.553574	0.368291
11489	Adam12	ENSMUSG00000054555	-0.708495	0.841097	NA	NA	NA	NA	NA	NA	NA	NA	NA	NA	NA	NA	NA	-2.39915	-2.39394	-2.39673	-2.39689	-2.39532	-2.39526	-2.39432	-2.39389	-2.39632	-2.39626
11490	Adam15	ENSMUSG00000028041	-0.205787	0.00252807	0.0407539	-0.289518	0.00125908	0.0176654	-0.313341	0.000101933	0.00419613	-0.198249	0.0100941	0.059396	-0.0664219	0.388323	0.598186	12.8964	13.0283	12.7815	12.9558	12.5907	12.8615	12.5179	12.5889	12.8462	12.8875
11491	Adam17	ENSMUSG00000052593	0.110372	0.130163	0.378367	0.291959	0.0226437	0.0850102	0.130169	0.306299	0.581439	0.050806	0.519266	0.754749	0.182417	0.0714728	0.204029	13.4138	13.3394	13.9827	13.7673	14.1515	14.0062	14.2345	14.2614	14.0973	13.9751
13524	Adam18	ENSMUSG00000031552	NA	NA	NA	-0.727633	0.836864	NA	NA	NA	NA	-0.770303	0.750172	NA	-0.0182634	0.995874	NA	-2.01299	-2.01426	-1.99456	-1.95486	-1.98383	-1.98339	-1.93536	-1.85022	-1.95056	-1.95006
11492	Adam19	ENSMUSG00000011256	0.227051	0.476349	0.72148	0.422332	0.203713	0.343488	0.0724822	0.771077	0.893965	0.358757	0.337275	0.61178	0.325902	0.423287	0.630835	9.19822	9.0347	9.50779	9.17372	7.90142	7.64467	8.3464	8.34589	9.25635	9.05751
280668	Adam1a	ENSMUSG00000072647	0.00946059	0.96951	0.986499	-0.0402949	0.910493	0.945254	-0.033143	0.919677	0.96456	-0.404592	0.0608927	0.212511	0.00262053	0.991474	0.995247	5.93163	5.88586	5.48953	5.48912	5.74862	5.74695	5.91268	6.21125	5.82576	5.8154
280667	Adam1b	ENSMUSG00000062438	1.61286	0.289085	NA	1.10562	0.502675	NA	0.623446	0.859961	NA	0.767352	0.828094	NA	0.00254452	0.999141	NA	-0.669573	-0.966866	-0.843649	-0.985083	-1.03307	-1.10364	-1.01767	-1.08495	-0.977476	-0.977612
11495	Adam2	ENSMUSG00000022039	NA	NA	NA	NA	NA	NA	NA	NA	NA	NA	NA	NA	NA	NA	NA	0	0	0	0	0	0	0	0	0	0
384806	Adam20	ENSMUSG00000046282	NA	NA	NA	NA	NA	NA	NA	NA	NA	NA	NA	NA	NA	NA	NA	0	0	0	0	0	0	0	0	0	0
56622	Adam21	ENSMUSG00000008438	0.327683	0.772341	NA	-0.636064	0.647517	NA	0.997478	0.421259	NA	0.482819	0.53501	NA	-0.664532	0.286826	NA	1.25324	1.18398	1.11318	1.25043	1.61441	1.21629	1.75998	1.73073	1.90628	2.20766
11496	Adam22	ENSMUSG00000040537	0.477125	0.00399631	0.0550001	0.60945	0.00253494	0.0259071	0.130647	0.646374	0.823512	-0.0226496	0.937611	0.976371	0.344012	0.299771	0.511483	6.26111	5.93366	6.24057	5.82137	5.75365	5.6231	5.36284	5.43131	5.0602	4.87623
23792	Adam23	ENSMUSG00000025964	-0.629424	0.770253	NA	0.167681	0.948267	NA	0.623446	0.859961	NA	0.767352	0.828094	NA	-1.359	0.698509	NA	-1.53594	-1.49134	-1.5101	-1.51167	-1.60273	-1.60216	-1.48626	-1.58855	-1.61269	-1.50543
13526	Adam24	ENSMUSG00000046723	NA	NA	NA	0.715035	0.83965	NA	NA	NA	NA	NA	NA	NA	NA	NA	NA	-2.40008	-2.4003	-2.39012	-2.39719	-2.39518	-2.39511	-2.39391	-2.39336	-2.39647	-2.39638
23793	Adam25	ENSMUSG00000071937	NA	NA	NA	NA	NA	NA	-1.56211	0.658106	NA	-1.58939	0.59013	NA	NA	NA	NA	-2.14174	-2.1428	-2.12655	-2.12754	-2.1177	-2.04987	-2.11146	-2.00752	-2.124	-2.12359
13525	Adam26a	ENSMUSG00000048516	NA	NA	NA	NA	NA	NA	NA	NA	NA	NA	NA	NA	NA	NA	NA	0	0	0	0	0	0	0	0	0	0
382007	Adam26b	ENSMUSG00000063900	NA	NA	NA	NA	NA	NA	NA	NA	NA	NA	NA	NA	NA	NA	NA	0	0	0	0	0	0	0	0	0	0
13522	Adam28	ENSMUSG00000014725	-0.708495	0.841097	NA	NA	NA	NA	NA	NA	NA	NA	NA	NA	-0.735979	0.83502	NA	-2.33279	-2.32056	-2.3271	-2.32748	-2.32379	-2.32366	-2.32146	-2.32043	-2.32615	-2.31337
244486	Adam29	ENSMUSG00000046258	NA	NA	NA	NA	NA	NA	NA	NA	NA	-0.675316	0.848446	NA	NA	NA	NA	-2.40143	-2.40172	-2.39736	-2.39763	-2.39499	-2.39489	-2.39332	-2.38354	-2.39668	-2.39657
11497	Adam3	ENSMUSG00000031553	-0.341091	0.661962	NA	0.330871	0.629067	NA	-0.52468	0.202869	0.47085	-0.211683	0.438758	0.698673	-0.625374	0.041501	0.140036	3.1536	3.27514	3.32243	3.20069	4.45741	4.45197	5.16875	5.66297	4.99713	5.4609
71078	Adam30	ENSMUSG00000043468	-2.40317	0.413437	NA	0.581829	0.626152	NA	-0.950327	0.502583	NA	-1.02933	0.302014	NA	-0.780788	0.631827	NA	0.0317432	0.25842	0.574228	0.425237	0.569775	0.608226	0.462314	1.00337	0.292308	0.403453
353188	Adam32	ENSMUSG00000037437	-0.829995	0.131837	0.380206	-0.0967686	0.832904	0.89296	0.466606	0.525891	NA	-0.08572	0.873528	0.949244	-0.197692	0.600609	0.772024	2.87813	3.28928	3.4293	3.47814	3.19142	2.81216	3.21691	3.4091	3.73654	3.85606
110751	Adam33	ENSMUSG00000027318	0.54494	6.14348e-07	7.64617e-05	0.362486	0.0258339	0.0921223	0.280622	0.147282	0.398653	-0.109301	0.36592	0.638039	0.601127	2.08114e-06	6.3575e-05	8.19773	7.8315	7.96083	7.7037	7.55598	7.04645	8.232	8.67578	8.57538	8.15995
252866	Adam34	ENSMUSG00000079058	NA	NA	NA	NA	NA	NA	NA	NA	NA	NA	NA	NA	NA	NA	NA	0	0	0	0	0	0	0	0	0	0
546055	Adam39	ENSMUSG00000054033	NA	NA	NA	NA	NA	NA	1.19852	0.733021	NA	NA	NA	NA	NA	NA	NA	-2.33441	-2.33487	-2.32771	-2.32815	-2.29407	-2.32365	-2.32106	-2.31986	-2.32659	-2.32641
11498	Adam4	ENSMUSG00000072972	0.603679	0.14934	0.405108	0.439955	0.269148	0.415546	0.437243	0.465095	NA	0.41183	0.358037	0.631332	0.0410056	0.927611	0.963593	3.83293	3.50561	4.09837	3.81046	3.70916	3.33615	3.841	3.75909	3.76551	3.74551
11499	Adam5	ENSMUSG00000031554	-0.708495	0.841097	NA	0.241486	0.925189	NA	0.589796	0.854729	NA	NA	NA	NA	-0.735979	0.83502	NA	-1.88218	-1.83895	-1.77283	-1.77415	-1.76112	-1.80527	-1.84213	-1.8385	-1.85871	-1.81354
238406	Adam6a	ENSMUSG00000043945	NA	NA	NA	NA	NA	NA	NA	NA	NA	NA	NA	NA	NA	NA	NA	0	0	0	0	0	0	0	0	0	0
238405	Adam6b	ENSMUSG00000051804	0.734173	0.835418	NA	NA	NA	NA	0.623446	0.859961	NA	NA	NA	NA	NA	NA	NA	-2.32041	-2.33251	-2.32686	-2.32721	-2.32378	-2.32366	-2.30988	-2.32066	-2.32597	-2.32583
11500	Adam7	ENSMUSG00000022056	NA	NA	NA	NA	NA	NA	NA	NA	NA	NA	NA	NA	NA	NA	NA	0	0	0	0	0	0	0	0	0	0
11501	Adam8	ENSMUSG00000025473	-0.231038	0.0183551	0.134856	-0.224219	0.0841746	0.190095	-0.311619	0.0243569	0.158118	-0.388594	0.000466858	0.00534582	0.0302944	0.760441	0.873067	14.6334	14.7803	14.6739	14.8021	14.1918	14.5401	13.9022	13.9942	14.4206	14.3958
11502	Adam9	ENSMUSG00000031555	0.195366	0.064597	0.262165	0.304542	0.101176	0.214873	0.0794335	0.591767	0.791362	-0.0639849	0.417226	0.681854	0.255069	0.0287535	0.108955	12.2742	12.1427	12.4477	12.2213	12.7966	12.6658	12.9448	13.0652	13.0163	12.844
58860	Adamdec1	ENSMUSG00000022057	NA	NA	NA	NA	NA	NA	NA	NA	NA	NA	NA	NA	NA	NA	NA	0	0	0	0	0	0	0	0	0	0
11504	Adamts1	ENSMUSG00000022893	-0.209589	0.665562	0.840672	0.148472	0.531471	0.664057	-0.681296	0.279649	NA	-0.744373	0.238581	0.507537	-0.279996	0.700836	NA	3.37469	3.47036	5.05544	4.9327	3.17936	3.39629	3.01983	3.57832	3.04454	3.09351
224697	Adamts10	ENSMUSG00000024299	-0.121499	0.419391	0.678233	0.0699908	0.645591	0.757064	0.114095	0.426604	0.682611	0.265935	0.0937578	0.285052	0.340315	0.000836777	0.00825672	10.0598	10.1269	9.94936	9.87282	8.81434	8.80167	8.65433	8.44309	9.41676	9.188
239337	Adamts12	ENSMUSG00000047497	NA	NA	NA	0.715035	0.83965	NA	-0.0798533	0.981953	NA	NA	NA	NA	NA	NA	NA	-2.26783	-2.26845	-2.23909	-2.25949	-2.2537	-2.23368	-2.23023	-2.24843	-2.25741	-2.25717
279028	Adamts13	ENSMUSG00000014852	-0.457153	0.553261	NA	-0.612805	0.379447	NA	-1.38593	0.098452	NA	-1.58737	0.0718075	NA	-0.125136	0.867623	NA	1.92703	2.04822	2.13516	2.336	1.94815	2.35703	1.70477	2.40992	2.11583	2.13409
237360	Adamts14	ENSMUSG00000059901	0.961434	0.268385	NA	1.86942	0.0451716	NA	0.140257	0.792987	NA	-0.511045	0.377754	0.649167	0.502286	0.534548	NA	2.19786	1.89813	2.37556	1.80692	2.86479	2.79669	2.75274	2.97281	2.46673	2.22209
235130	Adamts15	ENSMUSG00000033453	NA	NA	NA	1.4374	0.683961	NA	NA	NA	NA	NA	NA	NA	0.706689	0.841496	NA	-2.26707	-2.26766	-2.22078	-2.25912	-2.2536	-2.2534	-2.25011	-2.24858	-2.23824	-2.2569
271127	Adamts16	ENSMUSG00000049538	NA	NA	NA	NA	NA	NA	NA	NA	NA	NA	NA	NA	NA	NA	NA	0	0	0	0	0	0	0	0	0	0
233332	Adamts17	ENSMUSG00000058145	-0.972524	0.549132	NA	1.95774	0.562953	NA	-0.730053	0.794218	NA	NA	NA	NA	NA	NA	NA	-1.37269	-1.2066	-1.33707	-1.51464	-1.49742	-1.37881	-1.42753	-1.48173	-1.50844	-1.50773
208936	Adamts18	ENSMUSG00000053399	-0.708495	0.841097	NA	0.715035	0.83965	NA	NA	NA	NA	0.767352	0.828094	NA	NA	NA	NA	-2.26699	-2.24878	-2.23972	-2.25908	-2.25359	-2.25339	-2.23132	-2.24859	-2.25711	-2.25688
240322	Adamts19	ENSMUSG00000053441	NA	NA	NA	NA	NA	NA	NA	NA	NA	NA	NA	NA	NA	NA	NA	0	0	0	0	0	0	0	0	0	0
216725	Adamts2	ENSMUSG00000036545	0.734173	0.835418	NA	0.715035	0.83965	NA	0.623446	0.859961	NA	-1.43025	0.6783	NA	1.29983	0.609843	NA	-1.83812	-1.88551	-1.81741	-1.86473	-1.85132	-1.85083	-1.79687	-1.74718	-1.72203	-1.81339
223838	Adamts20	ENSMUSG00000022449	NA	NA	NA	-0.727633	0.836864	NA	NA	NA	NA	-1.24787	0.722459	NA	-0.735979	0.83502	NA	-2.20523	-2.2061	-2.19261	-2.16543	-2.18526	-2.18496	-2.18009	-2.1218	-2.19049	-2.16215
330119	Adamts3	ENSMUSG00000043635	0.0241848	0.994537	NA	NA	NA	NA	0.0239254	0.979516	NA	1.3809	0.108606	NA	-0.256813	0.862231	NA	0.355366	0.349645	0.33598	0.332778	1.53192	1.40539	1.51237	1.02234	0.788152	0.769192
240913	Adamts4	ENSMUSG00000006403	0.925858	0.509249	NA	0.447105	0.171879	0.306147	0.281384	0.040459	0.205354	-0.169488	0.268431	0.541294	0.0227165	0.944975	0.97281	4.37143	4.33834	6.19386	5.9347	9.12228	9.37797	8.07123	7.72023	5.58256	5.56889
23794	Adamts5	ENSMUSG00000022894	1.44737	0.682028	NA	NA	NA	NA	NA	NA	NA	0.0460233	0.989423	NA	NA	NA	NA	-2.15288	-2.20286	-2.191	-2.19173	-2.18455	-2.18429	-2.1554	-2.1534	-2.18915	-2.18885
108154	Adamts6	ENSMUSG00000046169	0.348262	0.487673	0.730015	0.412165	0.420575	0.565711	0.274882	0.630968	NA	-0.104675	0.797207	0.914557	1.11338	0.00386696	0.0262756	3.69759	3.4681	3.79893	3.54344	3.90092	3.46251	3.99082	4.36242	4.59771	3.91265
108153	Adamts7	ENSMUSG00000032363	0.141978	0.890693	NA	0.224387	0.821193	NA	0.971944	0.0549193	NA	0.431656	0.558633	NA	2.24712	0.00133021	NA	1.77168	1.706	1.85539	1.80264	2.85623	2.46561	2.59784	2.22703	2.94968	1.87814
30806	Adamts8	ENSMUSG00000031994	-0.842563	0.686517	NA	0.0086941	0.998035	NA	1.2341	0.32393	NA	-0.196589	0.904902	NA	-1.15794	0.568299	NA	-0.435345	-0.341232	-0.468708	-0.47072	0.0746305	-0.231837	-0.131657	-0.202732	-0.398644	-0.254666
101401	Adamts9	ENSMUSG00000030022	NA	NA	NA	0.715035	0.83965	NA	NA	NA	NA	NA	NA	NA	-0.01464	0.996694	NA	-2.26704	-2.26763	-2.23968	-2.2591	-2.2536	-2.2534	-2.25011	-2.24858	-2.23826	-2.23803
77739	Adamtsl1	ENSMUSG00000066113	-0.708495	0.841097	NA	NA	NA	NA	1.15753	0.741992	NA	NA	NA	NA	-0.735979	0.83502	NA	-2.20122	-2.1783	-2.19056	-2.19126	-2.13703	-2.1841	-2.17998	-2.17806	-2.18877	-2.16483
77794	Adamtsl2	ENSMUSG00000036040	NA	NA	NA	NA	NA	NA	NA	NA	NA	NA	NA	NA	NA	NA	NA	0	0	0	0	0	0	0	0	0	0
269959	Adamtsl3	ENSMUSG00000070469	-0.708495	0.841097	NA	NA	NA	NA	NA	NA	NA	0.767352	0.828094	NA	NA	NA	NA	-2.33342	-2.32034	-2.32734	-2.32774	-2.3103	-2.32365	-2.3213	-2.32021	-2.32632	-2.32616
229595	Adamtsl4	ENSMUSG00000015850	0.125292	0.469479	0.715855	0.362861	0.103903	0.218448	0.180184	0.338181	0.610028	0.164191	0.439114	0.698825	0.601783	0.00422141	0.028034	6.32214	6.23655	6.59659	6.35378	6.47194	6.35303	6.34898	6.25175	6.47224	6.07854
66548	Adamtsl5	ENSMUSG00000043822	0.354273	0.0248334	0.157572	0.253417	0.253585	0.399534	0.235275	0.0979697	0.324921	0.323766	0.0229399	0.109093	0.241483	0.205731	0.405691	8.65726	8.40244	8.59844	8.39597	8.43031	8.23183	8.57147	8.41309	8.79069	8.61126
231821	Adap1	ENSMUSG00000056413	-0.173055	0.112086	0.350784	-0.274371	0.0907363	0.200239	-0.383243	0.00021097	0.00718066	-0.31465	0.000318483	0.00398606	-0.352654	0.000128437	0.00192376	11.3676	11.4687	11.4334	11.5835	11.2368	11.4217	11.4407	11.7166	11.5687	11.8014
216991	Adap2	ENSMUSG00000020709	0.237065	0.0790226	0.293258	0.542274	0.00748539	0.0463127	0.0418392	0.80121	0.911544	-0.287425	0.0617635	0.214749	0.371562	0.0137717	0.0655065	10.7476	10.5833	10.5616	10.2131	11.4363	11.2038	11.5972	12.0236	11.3774	11.1328
56417	Adar	ENSMUSG00000027951	-0.157556	0.0113712	0.103156	0.0215036	0.831336	0.891976	-0.145325	0.147994	0.399455	-0.32244	1.79913e-05	0.000369378	-0.0738439	0.349105	0.562314	11.8326	11.9183	11.926	11.8976	13.1548	13.1474	13.3045	13.6545	13.0648	13.113
110532	Adarb1	ENSMUSG00000020262	0.0424244	0.893564	0.953077	-0.326766	0.261451	0.407581	0.278689	0.366932	0.634914	0.0382733	0.940759	0.977646	0.292338	0.320919	0.533013	4.54507	4.49589	4.71847	4.89404	4.65535	4.73523	4.33619	4.08015	4.82365	4.64103
94191	Adarb2	ENSMUSG00000052551	NA	NA	NA	NA	NA	NA	NA	NA	NA	NA	NA	NA	NA	NA	NA	0	0	0	0	0	0	0	0	0	0
30947	Adat1	ENSMUSG00000031949	0.0222101	0.901805	0.957028	-0.000144657	0.999524	0.999847	0.349445	0.203163	0.470993	-0.0200622	0.953575	0.983211	0.241773	0.340831	0.553236	5.82678	5.80413	5.39869	5.38025	5.45496	5.32733	5.2817	5.20993	5.46931	5.32418
66757	Adat2	ENSMUSG00000019808	-0.29472	0.0496555	0.229456	-0.25402	0.183489	0.319368	-0.203109	0.207257	0.475507	-0.121893	0.502347	0.743425	-0.211035	0.216749	0.419069	6.93211	7.11691	6.95752	7.09253	6.98903	7.22568	6.89271	6.8743	6.73406	6.86165
100113398	Adat3	ENSMUSG00000113640	0.0526072	0.796136	0.909671	-0.281409	0.34562	0.494956	0.0102973	0.970609	0.988761	-0.0636706	0.79565	0.914039	-0.191254	0.489059	0.687495	5.5693	5.52893	5.12902	5.27127	5.48242	5.38014	5.61547	5.74666	5.53254	5.6657
72113	Adck1	ENSMUSG00000021044	-0.0575655	0.564749	0.776641	-0.224088	0.0312035	0.103254	-0.395731	0.022517	0.152089	-0.373258	0.000115362	0.00172594	-0.0632895	0.603853	0.774103	8.87274	8.90213	8.8585	8.98955	8.47746	8.54477	8.8663	9.29679	8.91653	8.95226
57869	Adck2	ENSMUSG00000046947	-0.0531908	0.615017	0.812265	-0.0822878	0.42804	0.572387	-0.0117381	0.935017	0.971833	-0.017576	0.86172	0.943588	0.0613636	0.570321	0.749883	8.83896	8.8683	8.41422	8.44966	8.4621	8.40364	8.73375	8.8191	8.82312	8.77934
268822	Adck5	ENSMUSG00000022550	-0.172114	0.0527864	0.236441	-0.344804	0.0166108	0.0722941	0.0240571	0.863882	0.940803	0.26718	0.0283775	0.126399	-0.0720242	0.497556	0.693999	10.0457	10.1561	9.73234	9.9359	9.55906	9.50495	9.68213	9.55915	9.85829	9.90469
432530	Adcy1	ENSMUSG00000020431	NA	NA	NA	NA	NA	NA	NA	NA	NA	NA	NA	NA	-0.735979	0.83502	NA	-2.4003	-2.40053	-2.39705	-2.39726	-2.39515	-2.39507	-2.39382	-2.39323	-2.3965	-2.38919
271639	Adcy10	ENSMUSG00000026567	NA	NA	NA	0.715035	0.83965	NA	0.623446	0.859961	NA	NA	NA	NA	0.706689	0.841496	NA	-2.2665	-2.26707	-2.2401	-2.25884	-2.23533	-2.25333	-2.25016	-2.24869	-2.23873	-2.25671
210044	Adcy2	ENSMUSG00000021536	-0.0543906	0.78165	0.902254	0.379604	0.0486155	0.135018	-0.198286	0.413566	0.672624	-0.111032	0.729576	0.88346	0.499076	0.0407018	0.138	6.55418	6.57398	6.89153	6.61659	6.20567	6.4864	5.82909	5.74764	6.3803	6.04624
104111	Adcy3	ENSMUSG00000020654	-0.0737383	0.629292	0.820205	0.327529	0.143937	0.272064	-0.1144	0.594347	0.793115	-0.568512	0.112821	0.322718	0.112093	0.689678	0.830028	7.3071	7.34592	7.36684	7.10918	6.52164	6.87053	5.98048	6.02229	5.72896	5.66767
104110	Adcy4	ENSMUSG00000022220	0.473689	0.622514	NA	-0.0268265	0.979607	NA	1.17134	0.390365	NA	-0.801206	0.558041	NA	0.385375	0.785052	NA	0.99485	0.825329	0.973798	0.96251	0.787278	0.664997	0.95218	0.923466	0.760313	0.713657
224129	Adcy5	ENSMUSG00000022840	-0.861129	0.436212	NA	2.28652	0.029672	NA	0.319823	0.751759	NA	-1.49385	0.298837	NA	1.27933	0.455656	NA	0.846184	1.05106	1.35879	0.691188	1.02233	1.0822	0.874342	1.01206	0.808668	0.585169
11512	Adcy6	ENSMUSG00000022994	-0.860815	0.0753852	0.28492	-0.0754951	0.876635	0.923655	0.457438	0.184669	0.447443	0.0226976	0.974601	NA	-0.637745	0.331719	NA	2.96868	3.38193	3.33483	3.36014	3.9418	4.06325	3.51833	3.10232	2.80311	3.06305
11513	Adcy7	ENSMUSG00000031659	0.297704	0.0198738	0.139521	0.508439	0.00705118	0.0449128	0.0786961	0.648453	0.825054	0.415177	1.38934e-05	0.000295097	0.44622	2.99182e-06	8.48964e-05	13.1196	12.9044	13.1872	12.8038	12.4965	12.4969	12.4851	12.1689	13.153	12.8474
11514	Adcy8	ENSMUSG00000022376	NA	NA	NA	NA	NA	NA	NA	NA	NA	NA	NA	NA	NA	NA	NA	0	0	0	0	0	0	0	0	0	0
11515	Adcy9	ENSMUSG00000005580	0.234426	0.123643	0.368317	0.842473	4.64774e-05	0.00209589	-0.147777	0.576609	0.780751	0.107221	0.693901	0.864075	1.18538	3.10495e-06	8.79049e-05	7.51789	7.35434	8.09382	7.46147	6.51041	6.62375	6.23634	6.13876	7.07519	6.34246
11516	Adcyap1	ENSMUSG00000024256	NA	NA	NA	NA	NA	NA	NA	NA	NA	NA	NA	NA	NA	NA	NA	0	0	0	0	0	0	0	0	0	0
11517	Adcyap1r1	ENSMUSG00000029778	NA	NA	NA	NA	NA	NA	NA	NA	NA	NA	NA	NA	NA	NA	NA	0	0	0	0	0	0	0	0	0	0
11518	Add1	ENSMUSG00000029106	0.104417	0.117851	0.360101	0.114029	0.0879206	0.19579	0.063052	0.464393	0.710375	0.122038	0.0854472	0.26664	0.0767982	0.275777	0.486488	12.0143	11.9385	11.9711	11.8776	11.8514	11.8159	11.8928	11.8156	12.0238	11.9692
11519	Add2	ENSMUSG00000030000	0.734173	0.835418	NA	0.715035	0.83965	NA	NA	NA	NA	NA	NA	NA	NA	NA	NA	-2.32017	-2.33317	-2.31449	-2.32747	-2.32379	-2.32366	-2.32146	-2.32044	-2.32615	-2.32599
27360	Add3	ENSMUSG00000025026	0.44447	0.000252653	0.00879303	0.472323	0.00783647	0.0474412	0.353954	0.0258741	0.163017	0.243308	0.14126	0.371462	1.23737	2.83124e-17	1.29734e-14	9.9662	9.63446	10.0655	9.69203	9.13892	9.29392	8.28973	7.75102	8.2195	7.55718
215772	Adgb	ENSMUSG00000050994	1.2012	0.0572493	NA	0.336882	0.49187	0.629928	0.260546	0.512397	0.743738	1.25544	5.67636e-07	2.00689e-05	1.51949	2.29113e-17	1.133e-14	3.98434	3.52205	4.14209	3.99912	4.91031	4.3991	5.58611	5.10726	7.39441	6.20738
52389	Adgra1	ENSMUSG00000025475	NA	NA	NA	NA	NA	NA	NA	NA	NA	NA	NA	NA	-0.735979	0.83502	NA	-2.39995	-2.40016	-2.39695	-2.39715	-2.3952	-2.39513	-2.39397	-2.39343	-2.39645	-2.38971
78560	Adgra2	ENSMUSG00000031486	0.0334929	0.928972	0.968623	-0.100852	0.851802	NA	0.0328507	0.947192	0.977657	0.207719	0.743427	NA	-0.173868	0.736199	0.858379	3.56653	3.53464	3.20322	3.24655	3.29083	3.38109	3.34393	3.12724	3.21694	3.3115
70693	Adgra3	ENSMUSG00000029090	-0.642507	0.00545409	0.0668758	-0.615311	0.0125278	0.0619898	-0.831745	0.0486411	0.225744	-1.16567	0.0331629	0.141906	-1.10405	0.0121379	0.0597812	4.75562	5.17257	4.77014	5.14903	4.18108	4.70019	3.82935	4.3039	3.8418	4.41754
107831	Adgrb1	ENSMUSG00000034730	NA	NA	NA	NA	NA	NA	NA	NA	NA	NA	NA	NA	-2.45885	0.267644	NA	-2.20217	-2.20294	-2.19105	-2.19178	-2.18457	-2.1843	-2.18001	-2.178	-2.18918	-2.09012
230775	Adgrb2	ENSMUSG00000028782	-1.3021	0.570407	NA	-0.727633	0.836864	NA	0.46951	0.479701	NA	-0.15246	0.893382	NA	-2.1632	0.224018	NA	0.202497	0.329255	0.180961	0.249152	1.37804	1.17446	0.798741	0.852526	0.317676	0.668254
210933	Adgrb3	ENSMUSG00000033569	NA	NA	NA	NA	NA	NA	NA	NA	NA	NA	NA	NA	NA	NA	NA	0	0	0	0	0	0	0	0	0	0
243277	Adgrd1	ENSMUSG00000044017	-1.27088	0.717579	NA	NA	NA	NA	NA	NA	NA	NA	NA	NA	-0.735979	0.83502	NA	-2.26486	-2.23296	-2.25756	-2.25804	-2.25331	-2.25314	-2.25031	-2.249	-2.25634	-2.23994
13733	Adgre1	ENSMUSG00000004730	-0.13525	0.0524039	0.235391	-0.0496941	0.688282	0.789272	-0.157432	0.188881	0.451992	-0.000276699	0.996996	0.998768	0.142035	0.121286	0.291652	15.5558	15.6357	15.6478	15.6578	15.9233	15.9117	16.1389	16.2595	16.3628	16.2626
52614	Adgre4	ENSMUSG00000032915	-0.0410227	0.785219	0.904226	0.135176	0.460846	0.602372	0.108265	0.629907	0.814742	0.195497	0.142152	0.372908	0.213371	0.389983	0.599586	8.43264	8.45815	8.61435	8.52168	8.69201	8.58591	8.59458	8.50183	8.22347	8.04815
26364	Adgre5	ENSMUSG00000002885	0.625726	5.88353e-06	0.000458518	0.811445	1.21649e-06	0.000130157	0.584418	0.0134401	0.113206	0.242613	0.0852616	0.266264	0.420987	0.0211191	0.0876798	10.2418	9.77698	10.4185	9.80112	9.27239	9.11867	8.72051	8.30033	8.28664	8.04513
77596	Adgrf1	ENSMUSG00000041293	0.0303021	0.987737	NA	0.447427	0.396991	NA	0.587469	0.103715	0.334241	0.586301	0.381466	NA	1.01702	0.108635	NA	1.82215	1.83047	3.09078	2.81947	3.75713	3.70287	3.3618	2.75121	3.00632	2.53401
435529	Adgrf2	ENSMUSG00000057899	-0.286112	0.887285	NA	-2.77945	0.082971	NA	-0.139243	0.962811	NA	0.0965028	0.946783	NA	0.85004	0.65414	NA	-0.420267	-0.415697	-0.500436	-0.0423426	-0.178561	-0.417255	-0.384245	-0.168709	-0.290268	-0.423873
381628	Adgrf3	ENSMUSG00000067642	-0.464086	0.796311	NA	-0.338718	0.831687	NA	1.12125	0.338207	NA	-1.09406	0.363228	NA	0.143589	0.874108	NA	0.428263	0.484112	0.540662	0.60531	0.823931	0.641466	0.813604	0.995696	1.03468	0.997833
78249	Adgrf4	ENSMUSG00000023918	-0.406187	0.762512	NA	0.00543031	0.99779	NA	-0.111469	0.974824	NA	-0.395645	0.836347	NA	1.25254	0.383223	NA	-0.25727	-0.194528	-0.282191	-0.280472	-0.296384	-0.434725	-0.420408	-0.210796	-0.0630923	-0.306742
224792	Adgrf5	ENSMUSG00000056492	NA	NA	NA	NA	NA	NA	NA	NA	NA	NA	NA	NA	0.706689	0.841496	NA	-2.40024	-2.40046	-2.39703	-2.39724	-2.39516	-2.39509	-2.39385	-2.39327	-2.38937	-2.39641
14766	Adgrg1	ENSMUSG00000031785	-0.062315	0.888481	0.950351	-0.107987	0.80525	0.872854	-0.358077	0.610399	NA	-0.771329	0.644968	NA	-0.599878	0.447688	NA	3.52292	3.61703	3.39122	3.43317	2.3912	2.7036	2.16954	2.10914	2.35089	2.56111
237175	Adgrg2	ENSMUSG00000031298	0.137741	0.936208	NA	0.204201	0.936957	NA	-0.882851	0.685627	NA	-1.23679	0.722357	NA	-0.065323	0.985227	NA	-1.00839	-1.0027	-1.07724	-1.09166	-1.12665	-0.990376	-1.11234	-1.03532	-1.13862	-1.13654
54672	Adgrg3	ENSMUSG00000060470	-0.13205	0.906003	NA	0.00361912	0.996767	NA	0.119284	0.910005	NA	2.16195	0.182743	NA	-0.517302	0.68957	NA	0.939624	0.979474	1.09641	1.11417	0.908915	1.02303	1.18104	0.6713	0.789976	0.907498
236798	Adgrg4	ENSMUSG00000053852	-0.708495	0.841097	NA	NA	NA	NA	NA	NA	NA	NA	NA	NA	NA	NA	NA	-2.39938	-2.39382	-2.39679	-2.39696	-2.39529	-2.39522	-2.39423	-2.39376	-2.39636	-2.39629
382045	Adgrg5	ENSMUSG00000061577	-0.335591	0.864723	NA	0.854318	0.552886	NA	1.60481	0.450572	NA	-0.915347	0.645469	NA	0.749811	0.59838	NA	-0.339063	-0.296883	-0.112801	-0.286398	-0.189094	-0.406945	-0.320787	-0.184534	-0.045668	-0.211548
215798	Adgrg6	ENSMUSG00000039116	0.21329	0.048073	0.225506	0.416159	0.0372962	0.115035	-0.094684	0.511495	0.743212	-0.138832	0.338516	0.612937	0.044065	0.800283	0.897001	8.78274	8.65538	8.9947	8.72926	10.3576	10.345	10.41	10.6193	9.54551	9.52941
239853	Adgrg7	ENSMUSG00000022755	-0.638594	0.541834	NA	3.28146	0.0576322	NA	0.793974	0.485363	NA	-0.909525	0.0833067	0.262884	-0.755807	0.199083	NA	1.49503	1.65125	1.60476	1.16013	1.85426	1.57889	2.50806	3.20157	2.215	2.59047
330814	Adgrl1	ENSMUSG00000013033	-0.00310986	0.989641	0.994337	-0.205041	0.478882	0.618488	-0.181918	0.591753	0.791362	0.387049	0.686834	NA	0.197796	0.747063	NA	4.83664	4.83069	4.782	4.90486	4.10064	4.40845	3.42034	3.09462	3.46846	3.39751
[truncated: 25,181 more rows]

## Sheet: Alignment stats
STAR STATS	2043_29866_ACAGTG	2043_29866_ACTGAT	2043_29866_ACTTGA	2043_29866_AGTTCC	2043_29866_ATCACG	2043_29866_ATTCCT	2043_29866_CAGATC	2043_29866_CCGTCC	2043_29866_CGATGT	2043_29866_CGTACG	2043_29866_CTTGTA	2043_29866_GAGTGG	2043_29866_GATCAG	2043_29866_GCCAAT	2043_29866_GGCTAC	2043_29866_GTCCGC	2043_29866_GTGAAA	2043_29866_TAGCTT	2043_29866_TGACCA	2043_29866_TTAGGC	2044_29867_ACAGTG	2044_29867_ACTGAT	2044_29867_ACTTGA	2044_29867_AGTTCC	2044_29867_ATCACG	2044_29867_ATTCCT	2044_29867_CAGATC	2044_29867_CCGTCC	2044_29867_CGATGT	2044_29867_CGTACG	2044_29867_CTTGTA	2044_29867_GAGTGG	2044_29867_GATCAG	2044_29867_GCCAAT	2044_29867_GGCTAC	2044_29867_GTCCGC	2044_29867_GTGAAA	2044_29867_TAGCTT	2044_29867_TGACCA	2044_29867_TTAGGC
Mapping speed, Million of reads per hour |	878.14	739.86	898.46	935.13	884.28	884.38	850.51	863.44	989.69	904.78	864.54	861.35	1022.28	852.70	854.42	870.53	839.69	734.91	865.38	982.28	964.94	921.17	851.38	884.84	814.60	900.42	951.32	874.35	821.11	815.53	847.84	863.61	864.62	954.90	915.48	1069.30	1068.62	876.25	918.49	1097.37
Number of input reads |	42931520	43569619	43175977	46496501	43968211	43727803	40871525	41253156	39862367	44987696	42506428	41871222	41459005	41924472	42958137	42317257	44550218	41849099	43028655	40382792	39669720	46314475	38785025	42275859	38014685	45771240	38845460	42503026	38090265	41003181	42862880	42700749	43711284	39787317	41450999	40989880	42150995	41865042	38780884	37493639
Average input read length |	50	50	50	50	50	50	50	50	50	50	50	50	50	50	50	50	50	50	50	50	50	50	50	50	50	50	50	50	50	50	50	50	50	50	50	50	50	50	50	50
UNIQUE READS:
Uniquely mapped reads number |	36913494	37410918	36094455	39076105	36631251	37584512	34256095	35072407	33647788	36694183	35989858	35572037	35754749	35003103	35982886	36444510	36682059	35917783	36462708	34550824	33361044	39640608	33247556	35704590	31442230	39040993	31759366	36686985	31525111	33067634	35833745	35425508	36798904	33240845	34348640	34904290	34024725	35841945	32996929	31574167
Uniquely mapped reads % |	85.98%	85.86%	83.60%	84.04%	83.31%	85.95%	83.81%	85.02%	84.41%	81.56%	84.67%	84.96%	86.24%	83.49%	83.76%	86.12%	82.34%	85.83%	84.74%	85.56%	84.10%	85.59%	85.72%	84.46%	82.71%	85.30%	81.76%	86.32%	82.76%	80.65%	83.60%	82.96%	84.19%	83.55%	82.87%	85.15%	80.72%	85.61%	85.09%	84.21%
Average mapped length |	49.83	49.84	49.82	49.83	49.82	49.84	49.83	49.83	49.83	49.81	49.83	49.84	49.83	49.81	49.82	49.83	49.82	49.83	49.82	49.83	49.83	49.85	49.85	49.84	49.84	49.85	49.84	49.85	49.84	49.83	49.84	49.84	49.84	49.85	49.83	49.84	49.82	49.85	49.86	49.85
Number of splices: Total |	5478702	4963903	4054166	5022264	5141892	5525840	4159304	4596353	4497346	4598562	4582468	4783809	4680391	4450362	4830664	5254491	5108144	4967634	4680392	4670442	4727464	5328981	4584878	4536023	4080222	5689556	4022226	4765937	3914146	3977592	4420717	3958952	4574359	4242485	4331177	4868441	4474696	5309094	4300020	3867676
Number of splices: Annotated (sjdb) |	5397618	4888387	3995594	4950335	5075120	5451290	4100203	4529658	4435142	4535746	4514834	4713074	4609518	4390058	4766863	5177902	5043507	4900318	4612517	4600476	4665976	5252638	4515341	4472503	4026277	5616709	3971214	4692239	3860185	3922700	4358761	3902214	4507724	4182662	4270558	4803902	4416370	5234530	4238588	3810313
Number of splices: GT/AG |	5430447	4923791	4019032	4978287	5097172	5479564	4123906	4557350	4458294	4560283	4541521	4742470	4641395	4412305	4789091	5207880	5066204	4926233	4639892	4630708	4688570	5286031	4546661	4496823	4046270	5642487	3989307	4726609	3881100	3944702	4382410	3925903	4534801	4206089	4293106	4827322	4438192	5262895	4264731	3833902
Number of splices: GC/AG |	35045	27974	22717	30035	30312	33329	23427	26585	26906	24702	27842	28894	26582	24828	27512	33279	27810	28537	27941	27831	26713	29778	26999	26775	22349	33094	21349	27329	21937	20813	24989	21175	26758	24668	23746	29043	23039	33090	24501	23113
Number of splices: AT/AC |	4223	3457	3063	4085	4518	4284	3304	3600	3686	3722	3784	3760	3431	3990	4257	4238	4332	3783	3752	3359	3596	3876	3119	3604	3496	4611	3357	3354	3030	3240	3632	3088	3512	3422	3827	3680	3966	4252	3102	3050
Number of splices: Non-canonical |	8987	8681	9354	9857	9890	8663	8667	8818	8460	9855	9321	8685	8983	9239	9804	9094	9798	9081	8807	8544	8585	9296	8099	8821	8107	9364	8213	8645	8079	8837	9686	8786	9288	8306	10498	8396	9499	8857	7686	7611
Mismatch rate per base, % |	0.15%	0.15%	0.17%	0.16%	0.16%	0.15%	0.16%	0.16%	0.16%	0.16%	0.16%	0.15%	0.16%	0.17%	0.16%	0.16%	0.16%	0.16%	0.16%	0.16%	0.15%	0.15%	0.14%	0.15%	0.15%	0.14%	0.15%	0.14%	0.15%	0.15%	0.15%	0.15%	0.14%	0.15%	0.16%	0.15%	0.15%	0.14%	0.14%	0.15%
Deletion rate per base |	0.00%	0.00%	0.00%	0.00%	0.00%	0.00%	0.00%	0.00%	0.00%	0.00%	0.00%	0.00%	0.00%	0.00%	0.00%	0.00%	0.00%	0.00%	0.00%	0.00%	0.00%	0.00%	0.00%	0.00%	0.00%	0.00%	0.00%	0.00%	0.00%	0.00%	0.00%	0.00%	0.00%	0.00%	0.00%	0.00%	0.00%	0.00%	0.00%	0.00%
Deletion average length |	1.42	1.39	1.44	1.42	1.46	1.41	1.43	1.41	1.44	1.43	1.45	1.40	1.43	1.55	1.45	1.50	1.46	1.43	1.44	1.41	1.44	1.43	1.40	1.43	1.43	1.41	1.42	1.39	1.42	1.42	1.48	1.44	1.40	1.41	1.50	1.44	1.46	1.42	1.41	1.43
Insertion rate per base |	0.00%	0.00%	0.00%	0.00%	0.00%	0.00%	0.00%	0.00%	0.00%	0.00%	0.00%	0.00%	0.00%	0.00%	0.00%	0.00%	0.00%	0.00%	0.00%	0.00%	0.00%	0.00%	0.00%	0.00%	0.00%	0.00%	0.00%	0.00%	0.00%	0.00%	0.00%	0.00%	0.00%	0.00%	0.00%	0.00%	0.00%	0.00%	0.00%	0.00%
Insertion average length |	1.14	1.13	1.14	1.13	1.15	1.13	1.15	1.13	1.14	1.13	1.14	1.13	1.14	1.17	1.15	1.15	1.13	1.13	1.15	1.14	1.14	1.14	1.13	1.14	1.14	1.13	1.14	1.14	1.14	1.14	1.15	1.14	1.13	1.13	1.16	1.16	1.14	1.13	1.13	1.14
MULTI-MAPPING READS:
Number of reads mapped to multiple loci |	5228215	5351846	5960057	6283260	6428223	5394372	5626696	5297329	5312238	7200383	5478813	5386893	4911351	5949932	6058314	5041071	6959776	5127222	5491759	5016335	5480325	5800610	4780731	5635591	5763262	5941688	6194702	5019339	5634410	6881100	6083534	6160592	5836489	5588611	6211721	5295721	7127769	5237888	4995348	5000466
% of reads mapped to multiple loci |	12.18%	12.28%	13.80%	13.51%	14.62%	12.34%	13.77%	12.84%	13.33%	16.01%	12.89%	12.87%	11.85%	14.19%	14.10%	11.91%	15.62%	12.25%	12.76%	12.42%	13.81%	12.52%	12.33%	13.33%	15.16%	12.98%	15.95%	11.81%	14.79%	16.78%	14.19%	14.43%	13.35%	14.05%	14.99%	12.92%	16.91%	12.51%	12.88%	13.34%
Number of reads mapped to too many loci |	330828	327114	474441	540333	403982	313112	454358	364840	424757	504970	479384	433273	309213	381452	389881	330924	412682	306821	486553	334295	328401	345079	314931	428453	354383	331536	384887	311328	425329	478854	424803	473956	488481	445402	365829	310106	434987	322300	321655	413953
% of reads mapped to too many loci |	0.77%	0.75%	1.10%	1.16%	0.92%	0.72%	1.11%	0.88%	1.07%	1.12%	1.13%	1.03%	0.75%	0.91%	0.91%	0.78%	0.93%	0.73%	1.13%	0.83%	0.83%	0.75%	0.81%	1.01%	0.93%	0.72%	0.99%	0.73%	1.12%	1.17%	0.99%	1.11%	1.12%	1.12%	0.88%	0.76%	1.03%	0.77%	0.83%	1.10%
UNMAPPED READS:
% of reads unmapped: too many mismatches |	0.00%	0.00%	0.00%	0.00%	0.00%	0.00%	0.00%	0.00%	0.00%	0.00%	0.00%	0.00%	0.00%	0.00%	0.00%	0.00%	0.00%	0.00%	0.00%	0.00%	0.00%	0.00%	0.00%	0.00%	0.00%	0.00%	0.00%	0.00%	0.00%	0.00%	0.00%	0.00%	0.00%	0.00%	0.00%	0.00%	0.00%	0.00%	0.00%	0.00%
% of reads unmapped: too short |	0.66%	0.64%	0.84%	0.74%	0.77%	0.63%	0.80%	0.74%	0.75%	0.83%	0.79%	0.67%	0.71%	0.97%	0.81%	0.75%	0.74%	0.76%	0.82%	0.73%	0.82%	0.73%	0.69%	0.72%	0.78%	0.64%	0.86%	0.68%	0.83%	0.87%	0.78%	0.85%	0.78%	0.79%	0.86%	0.77%	0.88%	0.71%	0.74%	0.80%
% of reads unmapped: other |	0.40%	0.46%	0.65%	0.54%	0.37%	0.37%	0.51%	0.52%	0.45%	0.48%	0.52%	0.48%	0.45%	0.43%	0.42%	0.44%	0.37%	0.42%	0.54%	0.47%	0.44%	0.41%	0.45%	0.48%	0.42%	0.36%	0.45%	0.47%	0.49%	0.54%	0.43%	0.65%	0.56%	0.49%	0.40%	0.40%	0.46%	0.39%	0.46%	0.55%

## Sheet: Sampleinfo
	Sample.ID	Sample.Name	FGC.ID	CRG.Project.ID	CRG.ID	barcode.number	barcode.seq	batch	animal.num	genotype	Time	Age	Cage
ko_un_03	1768 2018	03 un	2043	P3186	29866	Index 1	ATCACG	1	3	ko	un	9_0	104
ko_1h_03	1769 2018	03 1h	2043	P3186	29866	Index 2	CGATGT	1	3	ko	1h	9_0	104
ko_3h_03	1770 2018	03 3h	2043	P3186	29866	Index 3	TTAGGC	1	3	ko	3h	9_0	104
ko_6h_03	1771 2018	03 6h	2043	P3186	29866	Index 4	TGACCA	1	3	ko	6h	9_0	104
ko_9h_03	1772 2018	03 9h	2043	P3186	29866	Index 5	ACAGTG	1	3	ko	9h	9_0	104
wt_un_25	1773 2018	25 un	2043	P3186	29866	Index 6	GCCAAT	1	25	wt	un	15_3	101
wt_1h_25	1774 2018	25 1h	2043	P3186	29866	Index 7	CAGATC	1	25	wt	1h	15_3	101
wt_3h_25	1775 2018	25 3h	2043	P3186	29866	Index 8	ACTTGA	1	25	wt	3h	15_3	101
wt_6h_25	1776 2018	25 6h	2043	P3186	29866	Index 9	GATCAG	1	25	wt	6h	15_3	101
wt_9h_25	1777 2018	25 9h	2043	P3186	29866	Index 10	TAGCTT	1	25	wt	9h	15_3	101
ko_un_62	1783 2018	62 un	2043	P3186	29866	Index 11	GGCTAC	1	62	ko	un	14_3	10
ko_1h_62	1784 2018	62 1h	2043	P3186	29866	Index 12	CTTGTA	1	62	ko	1h	14_3	10
ko_3h_62	1785 2018	62 3h	2043	P3186	29866	Index 14	AGTTCC	1	62	ko	3h	14_3	10
ko_6h_62	1786 2018	62 6h	2043	P3186	29866	Index 16	CCGTCC	1	62	ko	6h	14_3	10
ko_9h_62	1787 2018	62 9h	2043	P3186	29866	Index 18	GTCCGC	1	62	ko	9h	14_3	10
wt_un_88	1798 2018	88 un	2043	P3186	29866	Index 19	GTGAAA	1	88	wt	un	10_0	9
wt_1h_88	1799 2018	88 1h	2043	P3186	29866	Index 22	CGTACG	1	88	wt	1h	10_0	9
wt_3h_88	1800 2018	88 3h	2043	P3186	29866	Index 23	GAGTGG	1	88	wt	3h	10_0	9
wt_6h_88	1801 2018	88 6h	2043	P3186	29866	Index 25	ACTGAT	1	88	wt	6h	10_0	9
wt_9h_88	1802 2018	88 9h	2043	P3186	29866	Index 27	ATTCCT	1	88	wt	9h	10_0	9
ko_un_02	1877 2018	02 un.2	2044	P3186	29867	Index 1	ATCACG	2	2	ko	un	9_0	104
ko_1h_02	1878 2018	02 1h.2	2044	P3186	29867	Index 2	CGATGT	2	2	ko	1h	9_0	104
ko_3h_02	1879 2018	02 3h.2	2044	P3186	29867	Index 3	TTAGGC	2	2	ko	3h	9_0	104
ko_6h_02	1880 2018	02 6h.2	2044	P3186	29867	Index 4	TGACCA	2	2	ko	6h	9_0	104
ko_9h_02	1881 2018	02 9h.2	2044	P3186	29867	Index 5	ACAGTG	2	2	ko	9h	9_0	104
ko_un_55	1778 2018	55 un	2044	P3186	29867	Index 7	CAGATC	2	55	ko	un	12_6	8
ko_1h_55	1779 2018	55 1h	2044	P3186	29867	Index 6	GCCAAT	2	55	ko	1h	12_6	8
ko_6h_55	1780 2018	55 6h	2044	P3186	29867	Index 8	ACTTGA	2	55	ko	6h	12_6	8
ko_3h_55	1781 2018	55 3h	2044	P3186	29867	Index 9	GATCAG	2	55	ko	3h	12_6	8
ko_9h_55	1782 2018	55 9h	2044	P3186	29867	Index 10	TAGCTT	2	55	ko	9h	12_6	8
wt_un_69	1819 2018	69 un.2	2044	P3186	29867	Index 11	GGCTAC	2	69	wt	un	12_2	100
wt_1h_69	1820 2018	69 1h.2	2044	P3186	29867	Index 12	CTTGTA	2	69	wt	1h	12_2	100
wt_3h_69	1821 2018	69 3h.2	2044	P3186	29867	Index 14	AGTTCC	2	69	wt	3h	12_2	100
wt_6h_69	1822 2018	69 6h.2	2044	P3186	29867	Index 16	CCGTCC	2	69	wt	6h	12_2	100
wt_9h_69	1823 2018	69 9h.2	2044	P3186	29867	Index 18	GTCCGC	2	69	wt	9h	12_2	100
wt_un_87	1793 2018	87 un	2044	P3186	29867	Index 19	GTGAAA	2	87	wt	un	10_0	9
wt_1h_87	1794 2018	87 1h	2044	P3186	29867	Index 22	CGTACG	2	87	wt	1h	10_0	9
wt_3h_87	1795 2018	87 3h	2044	P3186	29867	Index 23	GAGTGG	2	87	wt	3h	10_0	9
wt_6h_87	1796 2018	87 6h	2044	P3186	29867	Index 25	ACTGAT	2	87	wt	6h	10_0	9
wt_9h_87	1797 2018	87 9h	2044	P3186	29867	Index 27	ATTCCT	2	87	wt	9h	10_0	9
