# Supplementary material for: Macrophage inflammation resolution requires CPEB4-directed offsetting of mRNA degradation
Source: eLife. 2022 Apr 20;11:e75873. doi: 10.7554/eLife.75873 (PMC9094754; doi:10.7554/eLife.75873)
Supplement: Supplementary file 2. — Wildtype and Cpeb4 KO bone marrow-derived macrophages (BMDMs) were left untreated or stimulated with lipopolysaccharide (LPS) for 9 hr. Immunoprecipitation (IP) with anti-CPEB4 antibody was then performed, and RNA was extracted and analyzed by RNAseq. CPEB4 targets were defined based on the enrichment between wildtype and Cpeb4 KO IPs. [file elife-75873-supp2.xlsx]

## Sheet: LPS_CPEB4-associated mRNAs 
CPEB4-associated mRNAs		Definition
0610010F05Rik		RIP-seq defined CPEB4 target mRNAs in BMDMs stimulated for 9h with LPS.
1110004F10Rik		Targets were defined by MACS peak calling in 3'UTR enriched Regions comparing reads obtained in the CPEB4 IP in Wild type and Cpeb4KO macrophages.
1110038F14Rik		CPEB4-associated mRNAs were defined as those mRNAS accomplishing any of the following criteria:
1110059E24Rik		(I) pvBY<0,02 and log2FC>0,5
1190002N15Rik		(II) pv<0,02 and log2FC>1,2
1810030O07Rik		(III) max score>500 and log2FC>0,5.
2510009E07Rik
2510039O18Rik
2610001J05Rik
3830406C13Rik
4930453N24Rik
4931406P16Rik
4932438A13Rik
9530068E07Rik
A830010M20Rik
Aaed1
Abca1
Abcb10
Abcc1
Abce1
Abhd13
Abhd16a
Abhd17c
Abi1
Acap2
Acer3
Acly
Aco1
Acsl4
Actn4
Actr2
Actr3
Acvr1
Acvr1b
Adam10
Adam17
Adam9
Adgrl2
Adipor1
Adipor2
Aebp2
Ago2
Agpat5
Ahr
AI597479
Ak2
Akap7
Akirin1
Akna
Akt1
Alcam
Aldh18a1
Aldh3a2
Alg10b
Alg14
Alkbh5
Alkbh8
Ammecr1
Ampd3
Amz2
Angel2
Ankrd10
Ankrd13c
Ankrd27
Ankrd40
Ankrd44
Ankrd52
Anpep
Antxr1
Anxa2
Ap1ar
Ap1m1
Ap1s2
Ap2b1
Ap3m1
Ap3s1
Ap4e1
Ap5m1
Apaf1
Apbb2
Aph1a
Aph1b
Api5
Appbp2
Aprt
Arf4
Arf5
Arfgef1
Arg1
Arhgef3
Arhgef4
Arid2
Arid3a
Arid4a
Arih1
Arl2bp
Arl5a
Arl5b
Arl6ip5
Arl8a
Arl8b
Armc10
Arnt
Arpc2
Arpc5
Arpp19
Arrdc3
Arrdc4
Arsk
Asah1
Asb7
Asph
Atad1
Atf1
Atf2
Atf4
Atg5
Atg7
Atl2
Atl3
Atp11b
Atp11c
Atp13a3
Atp1a1
Atp2a2
Atp2b1
Atp2c1
Atp7a
Atp8b2
Atp8b4
Atxn1
Atxn3
Atxn7l3
Azi2
B230219D22Rik
B3gnt2
B3gnt9
B4galt1
B4galt3
B4galt5
B4galt6
Batf
Bax
Baz2a
Baz2b
Bbx
BC005537
BC048403
Bccip
Bcl10
Bcl2l11
Bcl3
Becn1
Bend6
Bfar
Bhlhe40
Bmi1
Bmp2k
Bod1
Bpnt1
Braf
Brd1
Brd3
Brd4
Brox
Bsdc1
Btbd1
Btbd7
Btf3l4
Btg1
Btg2
Bzw1
C330018D20Rik
C5ar1
Caap1
Cab39
Calcoco1
Calcrl
Calm2
Calu
Camk2d
Canx
Capn12
Caprin1
Capza1
Capza2
Capzb
Car13
Carm1
Carnmt1
Casd1
Casp2
Cat
Cav1
Cav2
Cbfb
Cbl
Cbx1
Cbx3
Ccdc126
Ccdc127
Ccdc43
Ccdc47
Ccdc50
Ccdc71l
Ccdc90b
Ccl2
Ccl22
Ccl3
Ccl6
Ccl7
Ccnc
Ccnd1
Ccng2
Ccni
Ccnt1
Ccny
Ccrl2
Cd14
Cd200
Cd200r4
Cd274
Cd300lb
Cd300lf
Cd33
Cd38
Cd40
Cd44
Cd47
Cd48
Cd69
Cd72
Cd82
Cd86
Cd93
Cdc14b
Cdc37l1
Cdc42
Cdc42ep3
Cdc42se2
Cdc73
Cdk12
Cdk13
Cdk17
Cdk2ap1
Cdk2ap2
Cdk4
Cdk6
Cdkn1a
Cdkn2aipnl
Cdyl
Cebpb
Cebpg
Celf1
Celf2
Cep192
Cep83
Cep85
Cept1
Cerkl
Cers6
Cflar
Cggbp1
Ch25h
Chd1
Chfr
Chic2
Chmp2b
Chpt1
Chrac1
Chsy1
Chuk
Cinp
Cisd2
Cks1b
Cks2
Clcn5
Cldnd1
Clec12a
Clec4e
Clec5a
Clic1
Clic4
Clic5
Clint1
Cln5
Clock
Cmip
Cmpk2
Cmtm3
Cmtm6
Cmtm7
Cnep1r1
Cnot6
Cnot6l
Cnot7
Coa5
Cog3
Col18a1
Commd10
Comt
Copb1
Coq10b
Cotl1
Cox15
Cox18
Cpd
Cpeb2
Cpeb4
Cpne1
Cpne2
Cpne3
Cpox
Cpped1
Cpsf2
Cpsf4
Creb1
Creb3l1
Crebl2
Crebrf
Crtc3
Csde1
Csf2rb2
Csf3
Csgalnact2
Csnk1a1
Csnk1e
Csnk1g2
Csnk1g3
Csnk2a1
Csrnp1
Ctbp2
Ctdspl2
Ctnnb1
Ctnnd1
Ctu2
Cul5
Cux1
Cxcl1
Cxcl10
Cxcl11
Cxcl16
Cxcl2
Cxcl3
Cyb5b
Cyb5r4
Cybb
Cyld
Cyp51
Cysltr1
D030056L22Rik
D16Ertd472e
D1Ertd622e
D230025D16Rik
Dag1
Dazap2
Dbf4
Dbt
Dcaf8
Dcbld2
Dcp1a
Dcp2
Dcun1d1
Dcun1d3
Dda1
Ddit4
Ddx21
Ddx3y
Ddx42
Ddx58
Dek
Dennd1b
Dennd6a
Desi2
Dhx33
Diaph1
Diaph2
Dido1
Dip2a
Dip2c
Dirc2
Dnajb1
Dnajb11
Dnajb5
Dnajb6
Dnajb9
Dnajc10
Dnajc8
Dock2
Dock4
Dolpp1
Dph6
Dpy19l1
Dpy19l4
Dpysl2
Dr1
Dram1
Dram2
Dusp1
Dusp11
Dusp6
Dusp7
Dvl2
Dync1li2
Dyrk1a
Dyrk2
E2f3
E2f4
Ece1
Edem1
Edem3
Edn1
Eea1
Eed
Eef1e1
Efhd2
Efr3a
Egln1
Ehd4
Eid1
Eif1a
Eif2ak2
Eif4ebp2
Eif4g2
Eif5a
Elavl1
Elf1
Elf2
Elk1
Elk3
Elk4
Ell2
Elovl5
Emc4
Emd
Eml4
Emp1
Enpp4
Ensa
Entpd7
Ep300
Epc2
Epm2a
Epn2
Eps15
Erf
Ergic1
Erh
Erlin1
Erlin2
Ern1
Ero1l
Esyt1
Esyt2
Etnk1
Ets2
Etv6
Evi2a
Evl
Exoc5
Exosc3
Fabp3
Faf2
Fam102b
Fam107b
Fam118b
Fam120a
Fam168b
Fam174a
Fam192a
Fam204a
Fam206a
Fam20b
Fam210a
Fam234b
Fam3c
Fam43a
Fam45a
Fam49b
Fam76b
Far1
Fbrs
Fbxl14
Fbxl3
Fbxo22
Fbxo28
Fbxo3
Fbxo33
Fbxo34
Fbxo9
Fcho2
Fchsd2
Fermt3
Fgfr1op2
Fip1l1
Flcn
Fli1
Flrt2
Fmnl1
Fmnl2
Fmr1
Fndc3b
Fnip1
Fnta
Fos
Fosl2
Foxn2
Foxp1
Fpgs
Frmd4b
Fubp3
Fundc1
Fut8
Fyb
Fyttd1
Fzd1
Fzd7
G3bp1
Gab1
Gabpa
Gabpb1
Gadd45a
Galnt1
Galnt11
Galnt2
Galnt7
Ganab
Gas2l3
Gatad2b
Gbp5
Gca
Gcc1
Gch1
Gclm
Gcsh
Gdap2
Gdpd1
Gfpt1
Ggh
Ggps1
Ggta1
Gid4
Ginm1
Git2
Gja1
Gk
Gltp
Glud1
Glul
Gm6377
Gmcl1
Gmeb1
Gmfb
Gna13
Gnai3
Gnaq
Gng12
Gng2
Gng5
Gnl3l
Gnpda1
Gnpnat1
Golga5
Golga7
Golph3
Golph3l
Golt1b
Gopc
Gosr1
Gosr2
Gpbp1l1
Gpd2
Gpr85
Grb2
Gsk3b
Gsr
Gtf2a1
Gtf2h1
Gtf2h3
Gtpbp10
H1f0
H2-K1
H2-T24
H2afv
H2afx
H3f3b
Hacd2
Hacd3
Hccs
Hcfc1
Hcfc2
Hdac1
Hdac2
Hdgf
Heatr5a
Helz
Herc4
Herpud2
Hif1a
Hilpda
Hipk1
Hipk3
Hist1h1c
Hk2
Hlx
Hmga2
Hmgcl
Hmgcr
Hmgcs1
Hmgn2
Hmgxb4
Hnrnpa0
Hnrnpab
Hnrnpd
Hnrnpf
Hnrnpk
Hnrnpu
Hnrnpul1
Hnrnpul2
Hook3
Hpse
Hs2st1
Hsd17b7
Hspa13
Hspa1b
Hspd1
Hsph1
Hus1
Hyal2
Hyou1
Ibtk
Id1
Id2
Id3
Idh1
Idi1
Ids
Ier3ip1
Ier5
Ifit2
Ifnar1
Ifnar2
Ifngr1
Ifrd1
Ift80
Igf1
Igf1r
Igf2bp2
Igfbp4
Ikbkg
Ikzf1
Ikzf5
Il10rb
Il12b
Il13ra1
Il1a
Il1rn
Il23a
Il2rg
Il6
Il6ra
Ilf3
Impa1
Impact
Impad1
Ing3
Ing5
Insig1
Ints12
Ints5
Ints9
Ipmk
Ipo8
Irak1
Irf1
Irf2
Irf5
Irf9
Isg20
Isg20l2
Itch
Itga4
Itgal
Itgav
Itgax
Itgb1
Itgb8
Itpripl2
Ivns1abp
Iws1
Jag1
Jak2
Jarid2
Jdp2
Jrkl
Jun
Jund
Kalrn
Kat2b
Kat6a
Katnbl1
Kbtbd2
Kcnj2
Kctd12
Kctd13
Kctd20
Kdelc2
Kdelr1
Kdelr2
Kdm2a
Kdm4a
Kdm4c
Kdm6b
Kdm7a
Khdrbs1
Kif2a
Kif5b
Kin
Klf10
Klf2
Klf6
Klf7
Klhl20
Klhl5
Klhl7
Klhl8
Klhl9
Klra2
Kmt2e
Kmt5a
Kras
Krcc1
Lacc1
Lamc1
Lamp2
Lamtor3
Larp4
Larp4b
Lasp1
Lats1
Lats2
Lcp1
Lcp2
Ldah
Ldlr
Ldlrad3
Lemd3
Leprot
Leprotl1
Lgals8
Lif
Lig3
Limd1
Lims1
Lin52
Lin54
Lin7c
Lipa
Lix1l
Lman1
Lman2
Lmbr1l
Lmo4
Lnpep
Lpar1
Lpcat1
Lpcat2
Lpgat1
Lpl
Lpp
Lrp12
Lrp6
Lrrc57
Lrrc8b
Lrrc8c
Lrrc8d
Lrrfip1
Lrrk2
Lsm12
Lsm14a
Lsm3
Lsm8
Luc7l2
Ly96
Lyrm1
Lztfl1
M6pr
Macf1
Mad2l1
Maea
Maf
Maff
Mafg
Mafk
Magohb
Magt1
Mak16
Malt1
Maml1
Man1a
Man2a1
Manf
Map2k3
Map3k12
Map3k2
Map4k3
Mapk6
Mapk8
Mapkapk2
Mapkapk3
Mapre1
Marcks
Marf1
Mark2
Max
Mbnl2
Mctp1
Mcu
Mdfic
Mdm2
Med1
Med11
Med13
Med14
Med17
Mef2a
Mef2c
Men1
Met
Metap2
Metrnl
Mettl14
Mettl21a
Mettl6
Mex3c
Mfap3
Mfap3l
Mfsd1
Mfsd10
Mfsd14a
Mfsd14b
Mfsd4a
Mfsd4b4
Mga
Mgat2
Mib1
Midn
Mier1
Mif4gd
Mink1
Mitd1
Mitf
Mknk1
Mknk2
Mllt1
Mlx
Mmd
Mmp12
Mmp13
Mmp9
Mob1a
Mob1b
Mob3b
Mob3c
Mob4
Mospd1
Mospd2
Mphosph6
Mpv17
Mpv17l
Mrc1
Mrgbp
Mrpl10
Mrpl50
Ms4a6b
Ms4a6d
Msi2
Msl1
Msl2
Msmo1
Msn
Msr1
Mta1
Mta2
Mtdh
Mtf2
Mtm1
Mtmr14
Mtpn
Mtss1
Mxd1
Myadm
Myd88
Myh9
Myl12a
Myl12b
Mylip
Mynn
Myo10
Myof
Mzt1
N4bp1
N4bp2l1
Naa30
Naa40
Naa50
Nab1
Nacc1
Nadk
Naf1
Naga
Naif1
Nampt
Nbeal1
Ncbp1
Ncbp2
Ncoa3
Ncoa4
Ncoa5
Ncoa6
Ndrg1
Ndst1
Ndufaf4
Nedd1
Nedd9
Nek7
Nelfa
Nf1
Nfatc2ip
Nfatc3
Nfe2l1
Nfe2l2
Nfkb1
Nfxl1
Nfya
Nfyb
Nfyc
Nin
Nip7
Nipa2
Nlk
Nmt2
Nob1
Nol11
Notch1
Notch2
Npc1
Npm3
Nptn
Nr1h2
Nr3c1
Nrbp1
Nrg4
Nrp1
Nrp2
Nsun3
Nt5c3
Nt5dc1
Nucks1
Nudcd2
Nudt4
Nufip2
Nup153
Nup160
Nup54
Nupl1
Nus1
Nutf2
Nxt2
Ogfrl1
Ola1
Olr1
Orai2
Orc6
Osm
Ostc
Ovca2
Oxsm
P2rx7
P4ha1
Pabpc1
Pabpn1
Pacs2
Pafah1b1
Pafah1b2
Pag1
Paip1
Pak4
Pan3
Pank2
Pank3
Papola
Papss1
Parp12
Parp14
Parp6
Paxip1
Pbx2
Pcdh7
Pcgf3
Pcgf5
Pcid2
Pcmtd2
Pcnp
Pdcd6
Pdcl
Pde10a
Pde4a
Pde4b
Pde6d
Pde7a
Pde8a
Pdia4
Pdik1l
Pdpk1
Pdss1
Pdzd8
Peli1
Pex11a
Pfkfb3
Pggt1b
Pgm1
Phb2
Phc2
Phc3
Phf2
Phf6
Phip
Phtf2
Pi4kb
Pias1
Pias4
Piezo1
Pigf
Pigm
Pign
Pik3c2a
Pik3ca
Pik3cd
Pik3r5
Pilra
Pim1
Pim3
Pip4k2b
Pip5k1a
Pkig
Pkn2
Pla2g12a
Pla2g4a
Plagl2
Plau
Plaur
Plcb3
Plek
Plekha1
Plekha3
Plekha8
Plekhf2
Plod2
Plpp3
Pls3
Plxna1
Plxnc1
Plxnd1
Pnrc1
Pnrc2
Poc1b
Pofut1
Pofut2
Pola2
Pold3
Polr2d
Polr2h
Pom121
Pon2
Ppard
Ppat
Ppfibp1
Ppif
Ppig
Ppil4
Ppp1cc
Ppp1r15b
Ppp1r18
Ppp1r2
Ppp1r3b
Ppp1r9b
Ppp2r5a
Ppp2r5e
Ppp3ca
Ppp3r1
Ppp4r2
Ppp6c
Ppp6r3
Ppt1
Pptc7
Pqlc1
Prdx1
Prex1
Prkaa1
Prkaca
Prkacb
Prkar2b
Prkch
Prkci
Prkx
Prmt6
Prorsd1
Pros1
Prpf40a
Prpsap2
Prrc2a
Psip1
Psmc3ip
Psmd11
Psmd7
Psme3
Ptbp1
Ptbp3
Ptges
Ptgr2
Ptgs2
Ptma
Ptms
Ptp4a1
Ptp4a2
Ptpn1
Ptpn12
Ptprc
Ptpre
Ptprj
Ptprs
Pum1
Pum2
Pura
Purb
Pvr
Pygo2
Pym1
Qk
R3hdm2
Rab10
Rab12
Rab14
Rab18
Rab1a
Rab21
Rab31
Rab32
Rab33b
Rab5a
Rab6a
Rab8b
Rabgap1
Rabgef1
Rac1
Rad21
Rad54l2
Rad9b
Raf1
Rala
Ralb
Rap1a
Rap2b
Rap2c
Rarg
Rasa2
Rasgrp1
Raver1
Rbbp9
Rbfox2
Rbl1
Rbm10
Rbm15
Rbm22
Rbm26
Rbm27
Rbm47
Rbm7
Rbms1
Rbms2
Rbpj
Rbpms
Rc3h1
Rc3h2
Rcan3
Rcc1
Rcc2
Rcn2
Rcor3
Rdh10
Rec114
Reep3
Rell1
Rffl
Rgs19
Rhbdf2
Rhob
Rhoq
Rin2
Rlim
Rnf11
Rnf111
Rnf114
Rnf115
Rnf13
Rnf130
Rnf145
Rnf149
Rnf166
Rnf2
Rnf213
Rnf24
Rnf38
Rnf44
Rnf6
Rnmt
Rock2
Rp2
Rpf2
Rpgrip1
Rpia
Rpn1
Rprd1a
Rprd1b
Rps27rt
Rps6ka3
Rrm2b
Rrs1
Rsad2
Rsbn1
Rsbn1l
Rsl1d1
Rsl24d1
Rtf1
Rtn4
Runx1
Ruvbl2
Rwdd4a
Rybp
S100a10
S1pr1
Sacm1l
Samd1
Samd10
Samd8
Samhd1
Samsn1
Sar1a
Sart3
Sash1
Sav1
Sbno1
Sc5d
Scaf4
Scamp1
Scoc
Scpep1
Sdc4
Sde2
Sdf2l1
Sec11a
Sec22a
Sec22b
Sec22c
Sec23a
Sec24a
Sec61a1
Sec62
Sec63
Seh1l
Sema4c
Sema4d
Senp1
Senp5
Sephs1
Serbp1
Serf2
Serinc3
Serp1
Serpinb2
Serpine1
Sertad2
Sertad3
Sesn2
Set
Setd1b
Setd2
Setd5
Sfmbt1
Sgk1
Sgk3
Sgms1
Sgms2
Sgpp1
Sh3bgrl
Sh3bgrl2
Sh3gl1
Sh3glb1
Sh3pxd2b
Sh3rf1
Shc1
Shisa3
Shoc2
Shtn1
Siah1a
Siah1b
Siah2
Sipa1l3
Sirpa
Siva1
Skil
Skp2
Slain2
Slc12a6
Slc13a3
Slc16a1
Slc16a10
Slc16a6
Slc19a2
Slc20a1
Slc20a2
Slc22a5
Slc25a15
Slc25a16
Slc25a24
Slc25a25
Slc25a32
Slc25a37
Slc25a38
Slc25a46
Slc25a51
Slc26a2
Slc2a1
Slc30a4
Slc31a2
Slc33a1
Slc35a1
Slc35a3
Slc35a5
Slc35c1
Slc39a1
Slc39a6
Slc40a1
Slc41a2
Slc44a1
Slc4a7
Slc6a6
Slc6a8
Slc7a11
Slc7a2
Slc7a8
Slco3a1
Slfn5
Slmap
Slx4ip
Smad4
Smad5
Smarcad1
Smarcc2
Smarcd2
Smco4
Smg8
Smim10l1
Smim13
Smim14
Smim15
Smndc1
Sms
Smurf2
Snap23
Snrnp40
Snrpa
Snrpd1
Snrpe
Snrpg
Snx18
Snx22
Snx3
Snx5
Soat1
Socs1
Socs3
Socs4
Sod2
Sos2
Sp1
Sp3
Spast
Spata13
Spcs2
Spcs3
Spg21
Spi1
Spin1
Spint2
Spns1
Spop
Sppl2a
Sppl3
Spred1
Spred2
Spry1
Spryd7
Sptssa
Srd5a3
Srebf2
Srek1
Srek1ip1
Srf
Srgn
Srpk2
Srpr
Srsf1
Srsf10
Srsf2
Srsf4
Srsf5
Srsf6
Srsf7
Srsf9
Ss18
Ssh2
Ssh3
Ssna1
Ssr1
Ssr2
Ssr3
St13
St18
St3gal1
St3gal4
St3gal5
St3gal6
St8sia4
Stam
Stambp
Stambpl1
Stard13
Stard5
Stat2
Stat3
Stat5b
Stau1
Stim2
Stk3
Stk4
Stk40
Strn3
Stt3a
Stx12
Stx4a
Stx6
Stx7
Stxbp1
Suco
Sumf2
Sumo1
Sumo2
Supt16
Surf2
Surf4
Susd6
Suz12
Syap1
Syf2
Syncrip
Syngr2
Synj1
Sypl
Szrd1
Tab2
Tacc1
Taf1
Taf12
Taf2
Taf5l
Taf6l
Taf7
Taf8
Taok1
Tap1
Tapt1
Tars
Tbc1d10a
Tbc1d14
Tbc1d15
Tbc1d20
Tbc1d23
Tbc1d2b
Tbcel
Tbl1x
Tbl1xr1
Tbp
Tbpl1
Tcea1
Tceanc
Tcf12
Terf2
Tfrc
Tgds
Tgfbr1
Tgfbr2
Tgif1
Tgm2
Tgoln1
Tgs1
Thbs1
Thg1l
Thoc2
Ticam1
Tifa
Tigar
Timm17a
Tiparp
Tiprl
Tirap
Tle4
Tln1
Tlr3
Tlr4
Tm6sf1
Tm7sf3
Tm9sf1
Tm9sf3
Tma16
Tma7
Tmbim6
Tmcc1
Tmco1
Tmco6
Tmed2
Tmed5
Tmed7
Tmem101
Tmem106b
Tmem123
Tmem127
Tmem131
Tmem164
Tmem165
Tmem167b
Tmem168
Tmem170b
Tmem185b
Tmem201
Tmem209
Tmem216
Tmem230
Tmem243
Tmem30a
Tmem33
Tmem38b
Tmem39a
Tmem41b
Tmem59
Tmem64
Tmem65
Tmem67
Tmem68
Tmem80
Tmem87a
Tmem87b
Tmod3
Tmtc2
Tmtc3
Tmx2
Tmx3
Tmx4
Tnfaip3
Tnfaip8
Tnfrsf1b
Tnfrsf21
Tnip3
Tnks
Tnks2
Tnpo1
Tns3
Tob2
Tollip
Tomm22
Tomm34
Tomm40
Tomm5
Top1
Tor1aip1
Tor1aip2
Tpd52l2
Tpm1
Tpm3
Tpm4
Tpp2
Tprgl
Tpst1
Tram1
Trem3
Trim25
Trim30a
Trim30d
Trim35
Trim36
Trmt11
Trp53
Trp53inp2
Trpt1
Trrap
Tshz1
Tsn
Tspan14
Tsr2
Ttc39b
Ttf1
Tusc1
Tvp23b
Twf1
Twsg1
Txndc5
Txnip
Txnrd1
U2surp
Uap1
Uba3
Uba6
Ubac2
Ubald2
Ube2a
Ube2d1
Ube2h
Ube2i
Ube2j1
Ube2k
Ube2l6
Ube2n
Ube2q2
Ube2r2
Ube2w
Ube4b
Ubfd1
Ubl3
Ubtd2
Ubtf
Ugcg
Ugdh
Uhmk1
Uhrf1
Urb1
Urb2
Usb1
Usf2
Usf3
Usp21
Usp3
Usp31
Usp34
Usp39
Usp7
Usp9x
Utp23
Uxs1
Vamp3
Vbp1
Vcl
Vdac1
Vegfa
Vezf1
Vgll4
Vhl
Vkorc1l1
Vma21
Vps26a
Vps37a
Vps72
Wac
Wapl
Wasf2
Wasl
Wdfy2
Wdfy3
Wdr1
Wdr3
Wdr36
Wdr45b
Wdr82
Wdr89
Wipf1
Wipi1
Wls
Wsb1
Wtap
Wwp1
Xiap
Xpot
Xpr1
Xrn1
Yaf2
Ybey
Yipf2
Yipf4
Yipf6
Ykt6
Yod1
Ypel2
Yrdc
Ythdc1
Ythdf2
Ythdf3
Ywhaz
Yy1
Zbed3
Zbtb14
Zbtb41
Zbtb44
Zbtb6
Zbtb7a
Zc3h12c
Zcchc14
Zcchc3
Zcchc8
Zdhhc13
Zdhhc18
Zdhhc20
Zdhhc21
Zdhhc3
Zdhhc5
Zdhhc8
Zeb2
Zfand5
Zfand6
Zfhx3
Zfp111
Zfp217
Zfp266
Zfp36
Zfp367
Zfp36l1
Zfp36l2
Zfp422
Zfp451
Zfp518a
Zfp654
Zfp706
Zfp740
Zfp790
Zfp871
Zfp91
Zfx
Zhx1
Zmiz1
Zmpste24
Zmynd11
Zmynd8
Znrd1
Zranb1
Zranb3
Zswim6

## Sheet: Un_CPEB4-associated mRNAs
CPEB4-associated mRNAs		Definition
Smim11		RIP-seq defined CPEB4 target mRNAs in untreated BMDMs.
Man2a1		Targets were defined by MACS peak calling in 3'UTR enriched Regions comparing reads obtained in the CPEB4 IP in Wild type and Cpeb4KO macrophages.
Rpl34		CPEB4-associated mRNAs were defined as those mRNAS accomplishing any of the following criteria:
Rab22a		(I) pvBY<0,02 and log2FC>0,5
Ssh2		(II) pv<0,02 and log2FC>1,2
Cd82		(III) max score>500 and log2FC>0,5.
Nup205
Dpm3
Snf8
Tox2
NA
Znrd1
Cpsf1
Fbl
Eef2k
Polr2j
Hnrnpd
Rps27l
Coprs
Ccz1
Ubash3b
Kat2b
Men1
Irak1
Creb3l1
Reep4
Psip1
Faap20
Sqrdl
Stard13
Slc35a5
Emilin1
Hdac1
Rad1
Prpsap2
Fam35a
Tma7
Ccl3
Scap
Crem
Mospd1
Pkig
Med21
Ccl2
Tmem216
Tpra1
Cntrob
Gas2l1
Tbp
Pdss1
Mccc2
Efcab14
Pkdcc
Hilpda
Pola2
Nr2f6
Csnk1e
Zfp513
Ssr2
Klf13
Ddx10
Rpf2
Ginm1
Tomm5
Spry2
Plk4
Nup54
Hmgcl
Cpsf4
Il1rn
Dusp1
Pla2g4a
Trib3
Manf
Dnah11
Cldnd1
Prkar2b
Tfap4
Tmem69
Cdc26
Csrnp1
Rab40b
Tmem170
Tmem254c
Ext2
Siva1
Wfdc12
Bag5
Chrnb1
Nup188
Zfp451
3110002H16Rik
Qtrtd1
Dffb
Mt2
Pprc1
Ier3ip1
Tmem260
Pim3
Ccl7
Bod1
Cnep1r1
Ppfibp2
Lin54
Arrdc3
Rcn2
Ints9
Psmc3ip
Aebp2
Coq10b
Tshz1
Ncbp1
Zwilch
Cnot7
Hivep1
Sertad2
Gabpb1
Ccl4
Rab13
Dnajb5
Myc
Commd2
Klra2
Rae1
Cdc34
Raver1
Med23
Rbbp9
Kctd13
Polr2d
Nod2
Smurf2
Bcl3
P4ha1
Pnrc1
Cdc42ep3
Cpped1
Klhl12
BC028528
Ppp1cc
Cspp1
Polr2h
Loxl2
D030056L22Rik
Gm9797
Lpcat2
Uxs1
Rab2b
Cdk4
Senp3
Slc25a32
Kmt5a
Rpia
Nrp2
Usb1
Tgif1
Nlk
Npc1
Naga
Sumo2
Cd48
Wdr73
Tmem39a
Hist1h1c
Txndc5
Golga7
Ugdh
Rala
Plaur
Srd5a3
Zdhhc8
Ostc
Bbc3
Rbm15b
Igfbp4
Brd3
Fbxw2
Gm5900
Dyrk2
H2afv
Tpm1
Jdp2
Arfgap3
Wdr25
Cercam
Slc20a1
Tnfrsf23
Vkorc1l1
Naf1
Csgalnact2
Klf2
Tnfaip8
Wtap
Mtdh
1810043H04Rik
Cpeb4
Carm1
Sesn2
Ctns
Fam188a
Slc25a16
Cmtm7
Atg5
Mllt10
Etaa1
Exoc4
Hells
Uap1
Zcchc10
Thbs1
Adgrl2
Vezf1
Tapt1
Bcl10
Sertad3
Lsm6
Ppif
Ifngr1
Dusp7
Slc16a1
Rgmb
Nectin2
Dlc1
Hpse
Ube2d1
Mlx
Pcbp4
Zfp326
Mef2a
Setd2
Skp2
Kifc3
Cept1
Ppib
Dusp6
Kras
Btbd1
P2rx7
Cdca7
Tbpl1
Ccdc112
Mex3c
Taf2
Syf2
Pkn2
Nrbf2
Dnaja3
Pim1
B4galt3
Terf2
Zbtb12
Plekha3
Stard3nl
Ank
Taf5l
Rnf166
Zdhhc21
Fam102a
Dguok
Tada1
Klhl8
Gtf2h3
Tbc1d10a
Alcam
Gm10401
Mettl14
Hira
Tmcc1
Ccng2
Pycr2
Siah1a
H2afx
Jag1
Rpusd2
Srsf4
B4galt1
Tec
Ldlrad3
Tcf12
Mesdc1
Slc35c1
St6gal1
Fbxo25
Nt5dc1
Nt5c3
Agpat9
Smim15
Wipi1
Cmtm3
Arf5
Mtf2
Chst11
Atp11b
Mettl6
Ublcp1
Tsr2
Erh
Ccdc43
Map2k3
Slc30a5
Sec61a1
Klf4
Cks1b
Slmap
Dr1
Sec11a
Lsm3
Gas6
Slc2a1
Ap1ar
Tmx2
Sav1
Slc35a1
Casd1
Syngr2
Kdelc2
Tm7sf3
Nfatc1
Cdca7l
Taf1
Fam49b
Snx3
Prkaca
Ddit4
Sdf2l1
Sppl3
Ubald2
Ssbp3
Ctso
Nck2
Hdac7
Hyou1
1110059E24Rik
Rnf130
Cxcl16
Slc25a24
Tmx3
Slc7a8
Strap
Chst14
Tbc1d8
Sipa1l2
Papolg
Phc2
Gk
Capn12
Tnfrsf21
Notch1
Il2rg
Sgms1
Tceb1
Prkch
Rbm15
Csnk1g2
Lamtor3
Socs3
Chfr
Jund
Pofut2
Herpud2
Tgfbr2
Rad9b
Txnip
Chmp2b
Ctdp1
Scmh1
Klhl20
Lamc1
Mta1
Serinc3
Tprgl
Klhl9
Ncoa6
Ddost
Fcgr2b
Rarg
Srsf9
Gnpda1
Paip1
Peli1
Myl12b
Zyx
Arid4a
Atp1a1
Yipf2
Runx2
Tomm40
Gmcl1
Slc17a5
Arrdc4
Slc40a1
Nfkbia
Tceanc
Cd300lb
Rai14
Rin2
Sf3a1
Rnf145
Irf8
Rsl24d1
Ncoa5
Eif2ak3
Dohh
Snx22
Chsy1
Rbms2
Fmnl1
Tmem64
Rap1a
Twsg1
Tusc1
Casp2
Stk40
Tmem230
Armc10
Golph3l
Kdm6b
Mak16
Kcnk13
Btbd2
Tomm22
Frat2
Papola
Gsr
Emp1
Abcc5
Asb7
Dip2a
Ergic1
Mylip
Cd200r1
Tvp23b
0610007P14Rik
Akap7
Rap2c
Kmt2e
Tmx4
Hmga2
Hlx
Btg2
Sumf2
Nfya
Nde1
Isg20l2
Mzt1
Yipf4
Jarid2
Erf
Tmem184b
Gm5113
Mfap3
Adrbk1
Pdcd7
Arl5a
Mkl1
M6pr
Cmip
Spred2
Bsdc1
Eya1
Zfp706
Caap1
Maml1
Slc35a2
Pfdn2
Nfkb1
Ampd2
Mitf
Smndc1
Mcm4
Fbxo30
Erlin1
Cxcr4
Tcf3
Abhd17c
Mfsd7b
Prosc
5730508B09Rik
Npas2
Nelfb
Ube2f
E2f4
Jak2
Ube2i
S1pr1
Slc2a12
Zranb3
Etv6
Phf2
Fbxl14
Pias4
Hmgcr
Tirap
Pan3
Rffl
Map4k3
Efnb1
Rwdd4a
Zdhhc7
Stt3a
Hcfc2
Mapkapk3
Klhl21
Sos2
Myd88
Tmem87a
Ppip5k2
Rcc1
Mmp13
Ets2
Zmiz1
Scyl2
Cul2
Ccdc126
Slc19a2
Psen2
Ldb1
Rasa2
Mfsd4b4
Golt1b
Rgs1
Tmed9
Rb1cc1
Snrpe
Nfyb
C2cd5
Kdelr2
Med11
Vimp
Plxna2
Ugcg
Gosr2
Mat2b
Plau
Gltscr1l
Creb1
Fam78a
Ppp4c
Pcid2
Ube2h
Suz12
Dnal4
Spred1
Slc44a1
Fos
Arf4
Cab39
Ptpn12
St8sia4
Tmem131
Tmem38b
Mob4
Lrp6
Galnt7
Slc25a25
Gm20388
Galnt2
Cav2
Atf2
Ankrd27
Selk
Bcl2l11
Cdc25a
Rnf149
Socs5
Wac
Prrc1
Fkrp
Aph1a
Lgals8
Sacm1l
Rbms1
Ms4a6c
Spryd7
Lemd3
Arl2bp
Mtm1
B630005N14Rik
Spcs2
Mr1
Irf5
Crebrf
Rock2
Hnrnpf
Metrnl
Zfp667
Tbl1x
Cdc40
Msl2
Stx6
Cnga3
Gpbp1l1
Irf1
Foxred2
Fam60a
Metap2
Tpk1
Cav1
Gatad1
Stx3
Nptx1
Sdc4
Ppfibp1
Pgam5
Akt1
Rprd1b
Ikzf5
Gse1
8030462N17Rik
Clint1
Kctd5
Mrpl10
Krcc1
Slc25a15
Sp1
Msmo1
Ndst1
Smarcd2
Nmt2
Tm9sf1
Nedd1
Siah2
Snapin
Hk2
Ifnar2
Clic1
Fzd7
Cops7b
Tap1
Wsb1
Dram1
Tor1aip1
Desi2
Irf2
2510039O18Rik
Fam3c
D230025D16Rik
Zdhhc20
Adprhl2
Dnajb6
Rbl2
Tmed2
Ric1
Atad1
1810030O07Rik
Id2
Lsm14a
Spata13
Dag1
Lman1
Mier1
Trabd
Ipmk
Mgat2
Pptc7
Mospd2
Nfe2l2
Kcnj2
Spg21
Vasp
Tbc1d2b
Mafk
Zfp422
Srebf2
Slc16a10
Atxn2l
Esyt1
Cyp51
Rps6ka3
Klc1
Bfar
Nf1
Rpn1
Exoc5
Arsk
Cep120
Lix1l
Ppm1a
Dab2ip
Atxn7l3
R3hdm2
Cdk13
Myl12a
Isca1
Galnt1
Mob1b
Brd4
Lats2
Trp53
Plekha8
Klf7
Bcl7b
Zfp36
Med13l
Gdpd1
Nudt4
Gng12
Pip5k1a
Arl8a
Gtpbp10
Itgav
Dek
Csnk2a1
Chmp4b
Srf
Vegfa
Wdr82
Kbtbd2
Cpne1
Pdia6
Elk3
Slc6a8
Ptp4a1
Poc1b
Mob3c
Rfx7
Elf2
Ralb
Mfsd14a
4931406P16Rik
Atf1
Manea
Tm9sf2
Atp2a2
Ndrg1
Arhgap17
Kdsr
Vprbp
Tmod3
Sbf2
Klhl5
Fam76b
Tmem165
Foxn2
Fam134b
Cyth3
Fam107b
Fam46a
Paip2
Otud1
Hmgn2
G3bp1
Pdgfa
Clec12a
Sh3gl1
Adnp2
Spop
Ankrd33b
Scarb2
Elf1
Dnajc10
Rabgef1
Ap3s1
Spcs3
Sgk3
Atp8b2
Fchsd2
Gm28036
Cggbp1
Nrp1
Fndc3b
N4bp1
Wbp5
Celf2
Smad5
Nup153
Zmynd11
Cnot8
E2f3
Nipa2
Trib1
Pde8a
Tob2
Mcu
Trappc10
Atp13a3
Rab18
Pqlc1
Ncoa7
Syap1
Lmnb1
Arl5b
Ppil4
Por
Rpgrip1
Smarca5
Mtch2
Strn3
Zfp367
Arl8b
Mtpn
Ero1l
Max
Dyrk1a
Hcfc1
Tpm4
Rnf13
Syne3
Reep3
Tm9sf3
Nup62
Rpp14
Hus1
Setd1b
Slc35d1
Osbpl9
Foxj2
Utp15
Klf6
Fam76a
Gltp
Trim30d
Cpd
Myh9
Prkx
Tbl1xr1
Ggta1
Pde4a
Fam120a
Wwc2
Msi2
Actn4
Itga4
Supt16
Scpep1
Tmem18
Zfand6
Tmem33
Ncbp2
Pcnp
Calm3
Plekhf2
Ube2c
Plxna1
9530068E07Rik
Srpr
Tmem123
Dscr3
Katnbl1
Rbm7
Tgfbr1
Fbxo21
Arl6ip6
Golph3
Stx4a
Lsm12
2017-09-15
Dach1
Pik3ca
Oxsm
Txnrd1
Pdik1l
Sptssa
Cdyl2
Atg7
Ccdc117
Eif1
Cdk17
Mknk2
Hacd2
Cwc25
Cdk9
Pank3
Oraov1
Abca1
Zhx1
Etv5
Nus1
Slc31a2
Plekha1
Dcp1a
Adam10
Surf4
Grb2
Pdgfb
Ube2b
AI606181
Cpeb3
Lin7c
Midn
1110059G10Rik
Prkaa1
Tmed5
Flcn
Pum2
Ptpn1
P2rx4
Heatr5a
Rhob
Mthfd2
Rtf1
Bcl7a
Tmem127
Ss18
Ptms
Mknk1
Stat5b
Gab1
B4galt5
Nkap
Cadm1
Pold3
Gmeb1
Snx18
Fubp3
Nek6
Rnf11
Mapre2
Plxnc1
Sumo1
Glul
Jun
Cbfb
Tmem168
Acer3
Tmem30a
Mdm2
Slc4a7
AI597479
Sat1
Pnrc2
Susd6
Igf1
Csnk1g3
Plxdc2
Tomm70a
Efr3a
Cebpg
Rad21
Slc9a6
Papd7
Cyfip2
Mdfic
Ankrd44
Cux1
Abl1
Psmd11
Zfp36l1
Rqcd1
Epb41
Bbx
Rybp
Nacc1
2310022A10Rik
Hspa13
Tmem167b
Zfp26
Egr2
S1pr2
Ifnar1
Mxd1
Ssr1
Ostm1
D1Ertd622e
Set
Slc41a2
Pdcl
Tspan14
Rhbdf2
Trp53inp1
Thoc2
Slc30a10
Cdca4
Capza1
Ube2r2
Stk24
Ptbp1
Ppp3ca
Ccny
B3gnt2
Tmem170b
Apaf1
2810417H13Rik
Shtn1
Adam9
Sp3
Ap1s2
Tmem106b
Ankrd40
Yy1
Ormdl2
Pafah1b2
Nxt2
Snap23
Ppm1k
Naa30
Sypl
Fam96a
Ssh1
Znrf3
Leprot
Khdrbs1
Vma21
Xpot
Ccnd1
Mfsd14b
Lats1
Atp2b1
Tsc22d3
Brd1
Csf1
Nufip2
Nr3c1
Dnajc14
Ppp1r18
Dapk1
Ppp6r3
Plxnb2
Myadm
Arnt
Impa1
Rnf38
2017-09-09
Tnfaip2
Ppp1r3b
Tab2
Api5
Ptbp3
Usp12
Calu
Ctdspl2
Tor3a
Pdpk1
Msl1
Gsk3b
Zfp275
Sgk1
Plagl2
Gnai2
Cat
Tmem189
Lamp2
Rab6a
Abi2
Tcea1
Sh3glb1
Ssr3
Ccdc71l
Lpgat1
Hnrnpa0
Tmem65
Mbnl2
St3gal1
Cd44
Fam117b
Cflar
Arhgap18
Crtc3
Gm28048
Stx7
Extl3
Ubfd1
Atxn3
Ep300
Ccnt1
Cd274
Sh3bgrl2
Nin
Atxn7
Fli1
Ubtf
Ube2w
Gclm
Pbrm1
Tbc1d14
Cdc27
Sgms2
Rgs2
Hif3a
Glud1
Kdm2a
Mllt6
Fam63b
Pbx2
St13
Snx5
Eea1
Psme3
Cpeb2
Leprotl1
Shisa5
Setd5
Ppp3r1
Faf2
Shoc2
Cd47
Arid1b
Nadk
Erbb2ip
Tnfrsf1b
Man1a
Coa5
Atxn1
Cnot6
Ccdc127
Hmox1
Gatsl2
Csnk1a1
Samd8
Helz
Sema4d
Impad1
Tbcel
Sgpp1
Fam20b
Rell1
Fnip1
H3f3b
Edil3
Rora
Sar1a
Pank2
Tor1aip2
Nampt
Dennd6a
Usf3
Gosr1
Efhd2
Rap1b
Slc12a6
Cers6
Rnf111
Arpc5
Kctd20
Msr1
Phf21a
Ano6
Stk4
Eya3
Slc30a1
Mxd4
Rcan3
Rap2b
Yipf6
Ids
Rest
Ensa
Tmem26
Zfp395
Luzp1
Usp45
B4galt6
Cdk19
Tmem87b
Dcp2
Abi1
Pacs2
Osbp
Ctnnd1
Ppp6c
Zcchc24
Bmp2k
Idh1
Rap2a
Erp29
Arf1
Rbpj
Brox
Tnks2
Rc3h2
Hipk1
Azin1
Far1
Acap2
Runx1
Calcrl
Tagln2
Amer1
Wwp1
Edem1
Lnpep
Cerkl
Baz2a
