# Supplementary material for: Macrophage inflammation resolution requires CPEB4-directed offsetting of mRNA degradation
Source: eLife. 2022 Apr 20;11:e75873. doi: 10.7554/eLife.75873 (PMC9094754; doi:10.7554/eLife.75873)
Supplement: Supplementary file 3. — For each gene, the reference sequence of the longest 3′-UTR was selected. The number of AREs and CPEs was calculated by scanning the corresponding 3′-UTR and counting the number of occurrences of each motif. The ARE/CPE score was calculated as the log2 transformed ratio between the number of ARE and CPE motifs. [file elife-75873-supp3.xlsx]

## Sheet: Hoja1
symbol	Ares	CPES	ARE/CPE score		Definition
0610009B22Rik	2	2	0		For each transcript, the longest 3'UTR was considered.
0610009O20Rik	0	0	No AREs or CPEs		AREs calculation. The number of AREs is calculated by scanning the corresponding 3'UTR and counting the number of occurrences of the ARE motif (ATTTA) and overlapping versions (ATTTATTTA) up to 5 overlapping motifs. Note that k overlapping motifs count as k ARE motif.
0610010F05Rik	7	10	-0.514573		CPEs calculation. The number of CPEs is calculated by scanning the corresponding 3'UTR and counting the number of occurrences of all the CPE motifs ('TTTTAT','TTTTAAT','TTTTAAAT','TTTTACT','TTTTCAT','TTTTAAGT','TTTTGT').
0610012G03Rik	0	0	No AREs or CPEs		ARE/CPE score. ARE/CPE score was calculated as the log2FC(number of AREs/number of CPEs). 3'UTRs with 0 AREs and 0 CPEs were named "No AREs or CPEs". 3'UTRs with only AREs were named AREd while 3'UTRs with only CPEs were named CPEd.
0610030E20Rik	3	6	-1
0610037L13Rik	0	1	CPEd
0610040J01Rik	1	2	-1
1110004E09Rik	0	0	No AREs or CPEs
1110004F10Rik	2	3	-0.584963
1110008F13Rik	0	1	CPEd
1110008L16Rik	0	0	No AREs or CPEs
1110008P14Rik	0	0	No AREs or CPEs
1110012L19Rik	0	0	No AREs or CPEs
1110017D15Rik	0	0	No AREs or CPEs
1110032A03Rik	0	1	CPEd
1110032F04Rik	2	10	-2.32193
1110034G24Rik	0	0	No AREs or CPEs
1110038F14Rik	0	0	No AREs or CPEs
1110051M20Rik	1	1	0
1110059E24Rik	1	3	-1.58496
1110059G10Rik	4	10	-1.32193
1110065P20Rik	0	0	No AREs or CPEs
1190002N15Rik	13	14	-0.106915
1190005I06Rik	1	0	AREd
1190007I07Rik	0	1	CPEd
1300017J02Rik	0	0	No AREs or CPEs
1500009L16Rik	2	4	-1
1500011B03Rik	0	1	CPEd
1500011K16Rik	0	1	CPEd
1500015O10Rik	1	0	AREd
1520401A03Rik	1	2	-1
1600002K03Rik	0	0	No AREs or CPEs
1600012H06Rik	4	6	-0.584963
1600014C10Rik	4	9	-1.16993
1600014C23Rik	0	0	No AREs or CPEs
1700001C19Rik	0	2	CPEd
1700001J03Rik	0	0	No AREs or CPEs
1700001K19Rik	0	0	No AREs or CPEs
1700001L19Rik	2	3	-0.584963
1700001O22Rik	0	0	No AREs or CPEs
1700003E16Rik	0	0	No AREs or CPEs
1700003F12Rik	0	0	No AREs or CPEs
1700007K09Rik	0	1	CPEd
1700007K13Rik	0	1	CPEd
1700008O03Rik	0	0	No AREs or CPEs
1700010I14Rik	1	1	0
1700011H14Rik	0	0	No AREs or CPEs
1700011L22Rik	0	0	No AREs or CPEs
1700012B09Rik	0	0	No AREs or CPEs
1700014D04Rik	0	0	No AREs or CPEs
1700015F17Rik	0	1	CPEd
1700016D06Rik	1	2	-1
1700017B05Rik	1	0	AREd
1700017D01Rik	0	0	No AREs or CPEs
1700019D03Rik	6	13	-1.11548
1700020D05Rik	0	0	No AREs or CPEs
1700020L24Rik	0	0	No AREs or CPEs
1700020N01Rik	3	2	0.584963
1700021F05Rik	1	1	0
1700022I11Rik	0	0	No AREs or CPEs
1700023F06Rik	0	0	No AREs or CPEs
1700025C18Rik	1	1	0
1700025F22Rik	0	1	CPEd
1700025G04Rik	6	5	0.263034
1700027J19Rik	0	1	CPEd
1700028J19Rik	0	0	No AREs or CPEs
1700029I15Rik	0	0	No AREs or CPEs
1700029J07Rik	1	0	AREd
1700029P11Rik	0	0	No AREs or CPEs
1700030J22Rik	1	5	-2.32193
1700030K09Rik	1	1	0
1700034I23Rik	4	1	2
1700037C18Rik	0	0	No AREs or CPEs
1700037H04Rik	0	0	No AREs or CPEs
1700047I17Rik1	8	10	-0.321928
1700047I17Rik2	0	0	No AREs or CPEs
1700048O20Rik	2	2	0
1700056E22Rik	0	1	CPEd
1700061G19Rik	0	0	No AREs or CPEs
1700064H15Rik	0	0	No AREs or CPEs
1700066B19Rik	0	1	CPEd
1700066M21Rik	6	8	-0.415037
1700067K01Rik	0	0	No AREs or CPEs
1700088E04Rik	0	0	No AREs or CPEs
1700092M07Rik	0	0	No AREs or CPEs
1700093K21Rik	0	0	No AREs or CPEs
1700102P08Rik	0	1	CPEd
1700109H08Rik	0	0	No AREs or CPEs
1700122O11Rik	0	1	CPEd
1700123O20Rik	5	2	1.32193
1700125H20Rik	0	0	No AREs or CPEs
1700128F08Rik	1	0	AREd
1810009A15Rik	0	1	CPEd
1810011H11Rik	0	2	CPEd
1810013L24Rik	5	16	-1.67807
1810022K09Rik	0	0	No AREs or CPEs
1810024B03Rik	1	1	0
1810030O07Rik	3	3	0
1810032O08Rik	1	2	-1
1810037I17Rik	0	3	CPEd
1810041L15Rik	1	1	0
1810043G02Rik	0	2	CPEd
1810055G02Rik	2	1	1
1810062G17Rik	0	1	CPEd
2010107E04Rik	1	0	AREd
2010109A12Rik	0	0	No AREs or CPEs
2010109I03Rik	0	1	CPEd
2010111I01Rik	3	1	1.58496
2010300C02Rik	0	1	CPEd
2010315B03Rik	4	6	-0.584963
2200002D01Rik	0	0	No AREs or CPEs
2210011C24Rik	0	0	No AREs or CPEs
2210016F16Rik	2	0	AREd
2210016L21Rik	0	2	CPEd
2210017I01Rik	0	0	No AREs or CPEs
2210408I21Rik	1	0	AREd
2300009A05Rik	1	0	AREd
2310007B03Rik	1	0	AREd
2310009B15Rik	0	1	CPEd
2310011J03Rik	0	1	CPEd
2310022A10Rik	2	6	-1.58496
2310022B05Rik	0	1	CPEd
2310033P09Rik	0	1	CPEd
2310035C23Rik	2	5	-1.32193
2310039H08Rik	0	1	CPEd
2310057M21Rik	10	19	-0.925999
2310061I04Rik	1	0	AREd
2410002F23Rik	1	5	-2.32193
2410004B18Rik	3	4	-0.415037
2410004P03Rik	0	0	No AREs or CPEs
2410015M20Rik	0	2	CPEd
2410089E03Rik	2	1	1
2410131K14Rik	5	6	-0.263034
2410141K09Rik	1	0	AREd
2510002D24Rik	0	1	CPEd
2510009E07Rik	5	13	-1.37851
2510039O18Rik	2	4	-1
2610001J05Rik	7	11	-0.652077
2610002M06Rik	17	17	0
2610008E11Rik	2	1	1
2610021A01Rik	5	0	AREd
2610028H24Rik	0	1	CPEd
2610044O15Rik8	1	0	AREd
2610301B20Rik	4	5	-0.321928
2610318N02Rik	0	0	No AREs or CPEs
2610507B11Rik	1	3	-1.58496
2610524H06Rik	0	0	No AREs or CPEs
2610528A11Rik	0	0	No AREs or CPEs
2700049A03Rik	1	1	0
2700062C07Rik	0	1	CPEd
2700081O15Rik	3	6	-1
2700097O09Rik	0	0	No AREs or CPEs
2810004N23Rik	0	0	No AREs or CPEs
2810006K23Rik	0	2	CPEd
2810021J22Rik	3	2	0.584963
2810403A07Rik	3	4	-0.415037
2810408A11Rik	0	0	No AREs or CPEs
2810474O19Rik	0	1	CPEd
2900011O08Rik	3	5	-0.736966
2900026A02Rik	1	7	-2.80735
3100002H09Rik	0	0	No AREs or CPEs
3110001I22Rik	0	4	CPEd
3110002H16Rik	1	1	0
3110021N24Rik	1	7	-2.80735
3110035E14Rik	8	4	1
3110040N11Rik	0	3	CPEd
3110043O21Rik	4	5	-0.321928
3110062M04Rik	0	0	No AREs or CPEs
3110070M22Rik	0	0	No AREs or CPEs
3110082I17Rik	0	0	No AREs or CPEs
3300002I08Rik	0	0	No AREs or CPEs
3425401B19Rik	1	0	AREd
3830403N18Rik	0	1	CPEd
3830406C13Rik	3	10	-1.73697
3830408C21Rik	2	4	-1
4430402I18Rik	0	1	CPEd
4833420G17Rik	0	1	CPEd
4833439L19Rik	4	4	0
4921507P07Rik	2	2	0
4921509C19Rik	0	0	No AREs or CPEs
4921513I03Rik	0	0	No AREs or CPEs
4921517D22Rik	6	3	1
4921524J17Rik	6	8	-0.415037
4921528I07Rik	0	4	CPEd
4921536K21Rik	2	2	0
4930402H24Rik	6	4	0.584963
4930404H24Rik	0	0	No AREs or CPEs
4930404N11Rik	0	0	No AREs or CPEs
4930415O20Rik	0	0	No AREs or CPEs
4930426L09Rik	2	1	1
4930430F08Rik	9	4	1.16993
4930432K21Rik	0	0	No AREs or CPEs
4930438A08Rik	1	0	AREd
4930442H23Rik	0	0	No AREs or CPEs
4930444G20Rik	1	0	AREd
4930444P10Rik	0	1	CPEd
4930449I24Rik	0	1	CPEd
4930451G09Rik	2	1	1
4930453N24Rik	11	11	0
4930486L24Rik	1	2	-1
4930503B20Rik	4	7	-0.807355
4930503E14Rik	1	5	-2.32193
4930503L19Rik	1	1	0
4930505A04Rik	0	0	No AREs or CPEs
4930507D05Rik	0	0	No AREs or CPEs
4930512M02Rik	0	0	No AREs or CPEs
4930518I15Rik	0	0	No AREs or CPEs
4930519G04Rik	4	4	0
4930524J08Rik	0	0	No AREs or CPEs
4930533K18Rik	1	0	AREd
4930539E08Rik	4	11	-1.45943
4930544D05Rik	0	0	No AREs or CPEs
4930548H24Rik	1	0	AREd
4930550C14Rik	0	0	No AREs or CPEs
4930550L24Rik	1	0	AREd
4930556J24Rik	0	0	No AREs or CPEs
4930562C15Rik	0	1	CPEd
4930579G24Rik	5	7	-0.485427
4930595D18Rik	0	0	No AREs or CPEs
4931406B18Rik	0	1	CPEd
4931406C07Rik	2	5	-1.32193
4931406P16Rik	5	9	-0.847997
4931414P19Rik	0	1	CPEd
4931422A03Rik	0	0	No AREs or CPEs
4931423N10Rik	0	1	CPEd
4931428F04Rik	2	2	0
4931440F15Rik	1	1	0
4932411N23Rik	5	7	-0.485427
4932414N04Rik	0	0	No AREs or CPEs
4932438A13Rik	2	4	-1
4932438H23Rik	4	2	1
4933402D24Rik	2	3	-0.584963
4933405L10Rik	0	0	No AREs or CPEs
4933406M09Rik	0	0	No AREs or CPEs
4933406P04Rik	0	1	CPEd
4933407L21Rik	0	0	No AREs or CPEs
4933408B17Rik	1	1	0
4933408J17Rik	2	0	AREd
4933411K16Rik	0	0	No AREs or CPEs
4933413G19Rik	0	0	No AREs or CPEs
4933415A04Rik	1	2	-1
4933415F23Rik	1	2	-1
4933417A18Rik	1	0	AREd
4933421I07Rik	0	5	CPEd
4933424G06Rik	0	0	No AREs or CPEs
4933427D06Rik	2	7	-1.80735
4933427D14Rik	0	2	CPEd
4933427I04Rik	0	2	CPEd
4933428G20Rik	0	0	No AREs or CPEs
4933430I17Rik	1	0	AREd
4933434E20Rik	0	0	No AREs or CPEs
5031439G07Rik	2	3	-0.584963
5330417C22Rik	5	9	-0.847997
5330417H12Rik	2	1	1
5430403G16Rik	2	0	AREd
5430427O19Rik	6	11	-0.874469
5730409E04Rik	1	4	-2
5730455P16Rik	6	5	0.263034
5730480H06Rik	1	6	-2.58496
5730559C18Rik	1	0	AREd
5830454E08Rik	0	0	No AREs or CPEs
5830473C10Rik	0	0	No AREs or CPEs
5930422O12Rik	0	0	No AREs or CPEs
6030445D17Rik	1	1	0
6030458C11Rik	6	14	-1.22239
6030468B19Rik	0	0	No AREs or CPEs
6330409D20Rik	0	2	CPEd
6430531B16Rik	1	0	AREd
6430548M08Rik	1	0	AREd
6430550D23Rik	4	2	1
6430571L13Rik	3	12	-2
6720489N17Rik	4	4	0
6820408C15Rik	0	0	No AREs or CPEs
7420461P10Rik	0	0	No AREs or CPEs
7530416G11Rik	2	1	1
8030462N17Rik	6	10	-0.736966
8430408G22Rik	0	4	CPEd
9030624J02Rik	3	5	-0.736966
9130008F23Rik	1	9	-3.16993
9130011E15Rik	0	0	No AREs or CPEs
9130019O22Rik	2	0	AREd
9130023H24Rik	1	2	-1
9130213A22Rik	0	4	CPEd
9130401M01Rik	0	0	No AREs or CPEs
9130409I23Rik	1	2	-1
9230019H11Rik	1	4	-2
9230104M06Rik	2	1	1
9230109A22Rik	3	5	-0.736966
9230110C19Rik	1	1	0
9330151L19Rik	3	5	-0.736966
9330159F19Rik	8	15	-0.906891
9330161L09Rik	1	2	-1
9330182L06Rik	6	9	-0.584963
9430015G10Rik	1	1	0
9430038I01Rik	0	0	No AREs or CPEs
9430097D07Rik	0	0	No AREs or CPEs
9530053A07Rik	0	0	No AREs or CPEs
9530068E07Rik	3	5	-0.736966
9530077C05Rik	0	2	CPEd
9830107B12Rik	4	4	0
9930012K11Rik	1	0	AREd
9930021J03Rik	1	3	-1.58496
9930022D16Rik	9	7	0.36257
9930111J21Rik1	0	1	CPEd
9930111J21Rik2	2	1	1
A130010J15Rik	2	5	-1.32193
A130051J06Rik	2	2	0
A1cf	3	3	0
A230050P20Rik	0	0	No AREs or CPEs
A230052G05Rik	0	1	CPEd
A2ml1	0	0	No AREs or CPEs
A3galt2	0	2	CPEd
A430005L14Rik	0	0	No AREs or CPEs
A430033K04Rik	1	2	-1
A430078G23Rik	3	2	0.584963
A430105I19Rik	0	2	CPEd
A4galt	0	5	CPEd
A530032D15Rik	0	0	No AREs or CPEs
A530064D06Rik	2	2	0
A530084C06Rik	1	6	-2.58496
A530099J19Rik	2	3	-0.584963
A630001G21Rik	0	1	CPEd
A630076J17Rik	0	1	CPEd
A630095N17Rik	0	0	No AREs or CPEs
A730015C16Rik	4	0	AREd
A730071L15Rik	0	3	CPEd
A830005F24Rik	0	2	CPEd
A930003A15Rik	1	1	0
A930004D18Rik	2	2	0
A930017K11Rik	1	0	AREd
A930018P22Rik	1	0	AREd
A930033H14Rik	3	4	-0.415037
AA386476	3	5	-0.736966
AA467197	0	2	CPEd
AA474408	3	9	-1.58496
AA986860	2	0	AREd
Aaas	1	0	AREd
Aacs	0	2	CPEd
Aaed1	0	3	CPEd
Aagab	0	0	No AREs or CPEs
Aak1	16	42	-1.39232
Aamdc	1	0	AREd
Aamp	0	0	No AREs or CPEs
Aanat	0	0	No AREs or CPEs
Aar2	2	1	1
Aard	2	3	-0.584963
Aars	2	1	1
Aars2	0	0	No AREs or CPEs
Aarsd1	0	0	No AREs or CPEs
Aasdh	0	0	No AREs or CPEs
Aasdhppt	10	9	0.152003
Aatf	0	1	CPEd
Aatk	0	3	CPEd
AB124611	0	2	CPEd
Abat	4	7	-0.807355
Abca1	6	10	-0.736966
Abca12	1	1	0
Abca13	2	2	0
Abca14	1	0	AREd
Abca17	0	0	No AREs or CPEs
Abca2	1	1	0
Abca3	0	1	CPEd
Abca4	0	1	CPEd
Abca5	14	16	-0.192645
Abca6	0	2	CPEd
Abca7	0	0	No AREs or CPEs
Abca8a	0	2	CPEd
Abca8b	4	11	-1.45943
Abca9	5	3	0.736966
Abcb10	2	7	-1.80735
Abcb11	1	2	-1
Abcb1a	3	3	0
Abcb1b	0	5	CPEd
Abcb4	0	0	No AREs or CPEs
Abcb6	0	0	No AREs or CPEs
Abcb7	12	22	-0.874469
Abcb8	0	0	No AREs or CPEs
Abcb9	1	2	-1
Abcc1	2	5	-1.32193
Abcc10	0	3	CPEd
Abcc12	0	3	CPEd
Abcc2	11	14	-0.347923
Abcc3	1	2	-1
Abcc4	3	4	-0.415037
Abcc5	3	4	-0.415037
Abcc6	0	0	No AREs or CPEs
Abcc8	0	0	No AREs or CPEs
Abcc9	6	5	0.263034
Abcd1	1	1	0
Abcd2	10	11	-0.137504
Abcd3	2	3	-0.584963
Abcd4	2	0	AREd
Abce1	5	9	-0.847997
Abcf1	0	0	No AREs or CPEs
Abcf2	1	2	-1
Abcf3	1	0	AREd
Abcg1	0	3	CPEd
Abcg2	8	11	-0.459432
Abcg3	1	1	0
Abcg4	1	1	0
Abcg8	3	4	-0.415037
Abhd10	4	14	-1.80735
Abhd11	0	1	CPEd
Abhd12	3	0	AREd
Abhd12b	2	0	AREd
Abhd13	10	14	-0.485427
Abhd14a	0	1	CPEd
Abhd14b	0	0	No AREs or CPEs
Abhd15	0	0	No AREs or CPEs
Abhd16a	1	1	0
Abhd16b	0	0	No AREs or CPEs
Abhd17a	0	0	No AREs or CPEs
Abhd17b	4	10	-1.32193
Abhd17c	6	8	-0.415037
Abhd18	8	15	-0.906891
Abhd2	4	10	-1.32193
Abhd3	4	5	-0.321928
Abhd4	1	1	0
Abhd5	7	5	0.485427
Abhd6	0	0	No AREs or CPEs
Abhd8	0	0	No AREs or CPEs
Abi1	5	9	-0.847997
Abi2	7	18	-1.36257
Abi3	0	0	No AREs or CPEs
Abi3bp	4	8	-1
Abl1	0	5	CPEd
Ablim1	3	4	-0.415037
Abr	1	4	-2
Abra	1	1	0
Abracl	0	3	CPEd
Abraxas1	0	4	CPEd
Abraxas2	6	5	0.263034
Abt1	1	3	-1.58496
Abtb1	0	0	No AREs or CPEs
Abtb2	1	2	-1
AC087559.2	0	0	No AREs or CPEs
AC125149.3	1	1	0
AC132444.1	0	0	No AREs or CPEs
AC133103.1	1	0	AREd
AC149090.1	1	2	-1
AC149222.1	2	2	0
AC168977.1	0	0	No AREs or CPEs
Acaa1a	0	0	No AREs or CPEs
Acaa1b	1	0	AREd
Acaa2	0	0	No AREs or CPEs
Acaca	2	1	1
Acacb	1	4	-2
Acad10	0	0	No AREs or CPEs
Acad11	1	2	-1
Acad12	0	0	No AREs or CPEs
Acad8	5	6	-0.263034
Acad9	3	4	-0.415037
Acadl	1	4	-2
Acadm	0	3	CPEd
Acads	0	0	No AREs or CPEs
Acadsb	3	2	0.584963
Acadvl	0	0	No AREs or CPEs
Acap1	0	0	No AREs or CPEs
Acap2	12	16	-0.415037
Acap3	0	0	No AREs or CPEs
Acat1	1	7	-2.80735
Acat2	0	4	CPEd
Acat3	0	2	CPEd
Acbd3	3	9	-1.58496
Acbd4	0	0	No AREs or CPEs
Acbd5	5	11	-1.1375
Acbd6	9	16	-0.830075
Acbd7	0	2	CPEd
Accs	0	1	CPEd
Accsl	1	1	0
Acd	0	1	CPEd
Ace	1	1	0
Acer1	1	0	AREd
Acer2	6	11	-0.874469
Acer3	18	39	-1.11548
Ache	1	0	AREd
Acin1	0	4	CPEd
Ackr1	0	1	CPEd
Ackr3	3	7	-1.22239
Ackr4	1	0	AREd
Acly	3	2	0.584963
Acmsd	1	2	-1
Aco1	0	3	CPEd
Aco2	1	2	-1
Acod1	1	2	-1
Acot1	2	0	AREd
Acot10	0	0	No AREs or CPEs
Acot11	1	1	0
Acot13	0	0	No AREs or CPEs
Acot2	0	1	CPEd
Acot3	1	1	0
Acot4	1	6	-2.58496
Acot5	0	1	CPEd
Acot6	2	6	-1.58496
Acot7	1	0	AREd
Acot8	0	0	No AREs or CPEs
Acot9	0	0	No AREs or CPEs
Acox1	2	2	0
Acox2	1	0	AREd
Acox3	3	3	0
Acoxl	1	0	AREd
Acp1	7	6	0.222392
Acp2	2	4	-1
Acp5	0	0	No AREs or CPEs
Acp6	0	2	CPEd
Acpp	5	10	-1
Acrbp	0	0	No AREs or CPEs
Acsbg1	1	0	AREd
Acsbg2	0	0	No AREs or CPEs
Acsf2	2	7	-1.80735
Acsf3	0	0	No AREs or CPEs
Acsl1	1	0	AREd
Acsl3	5	4	0.321928
Acsl4	10	13	-0.378512
Acsl5	0	1	CPEd
Acsl6	5	11	-1.1375
Acsm3	5	7	-0.485427
Acss1	2	6	-1.58496
Acta1	0	1	CPEd
Acta2	2	4	-1
Actb	1	10	-3.32193
Actc1	1	0	AREd
Actg1	2	1	1
Actg2	0	0	No AREs or CPEs
Actl10	0	1	CPEd
Actl6a	0	3	CPEd
Actl6b	0	1	CPEd
Actl7a	0	0	No AREs or CPEs
Actl7b	0	0	No AREs or CPEs
Actn1	0	6	CPEd
Actn3	0	0	No AREs or CPEs
Actn4	3	1	1.58496
Actr10	8	8	0
Actr1a	1	2	-1
Actr1b	3	1	1.58496
Actr2	8	11	-0.459432
Actr3	2	6	-1.58496
Actr3b	1	1	0
Actr5	0	1	CPEd
Actr6	1	4	-2
Actr8	0	1	CPEd
Acvr1	6	7	-0.222392
Acvr1b	5	9	-0.847997
Acvr2a	10	11	-0.137504
Acvr2b	0	0	No AREs or CPEs
Acvrl1	0	0	No AREs or CPEs
Acy1	0	0	No AREs or CPEs
Acy3	0	0	No AREs or CPEs
Acyp1	0	1	CPEd
Acyp2	1	2	-1
Ada	2	2	0
Adad1	4	9	-1.16993
Adal	1	2	-1
Adam10	3	14	-2.22239
Adam11	1	4	-2
Adam12	6	11	-0.874469
Adam15	1	0	AREd
Adam17	1	7	-2.80735
Adam18	0	0	No AREs or CPEs
Adam19	3	5	-0.736966
Adam1a	1	2	-1
Adam1b	0	1	CPEd
Adam20	1	0	AREd
Adam21	1	0	AREd
Adam22	6	19	-1.66297
Adam23	0	0	No AREs or CPEs
Adam25	1	0	AREd
Adam3	0	0	No AREs or CPEs
Adam30	4	3	0.415037
Adam32	0	0	No AREs or CPEs
Adam33	1	0	AREd
Adam39	0	0	No AREs or CPEs
Adam4	0	0	No AREs or CPEs
Adam5	2	1	1
Adam8	0	1	CPEd
Adam9	6	5	0.263034
Adamts1	6	2	1.58496
Adamts10	3	0	AREd
Adamts13	0	0	No AREs or CPEs
Adamts14	0	0	No AREs or CPEs
Adamts17	4	5	-0.321928
Adamts2	5	5	0
Adamts3	0	0	No AREs or CPEs
Adamts4	4	2	1
Adamts5	16	13	0.29956
Adamts6	5	1	2.32193
Adamts7	0	1	CPEd
Adamts8	1	0	AREd
Adamts9	4	9	-1.16993
Adamtsl1	7	6	0.222392
Adamtsl4	1	1	0
Adamtsl5	1	0	AREd
Adap1	2	0	AREd
Adap2	0	0	No AREs or CPEs
Adar	1	2	-1
Adarb1	4	11	-1.45943
Adarb2	4	3	0.415037
Adat1	0	4	CPEd
Adat2	0	1	CPEd
Adat3	0	0	No AREs or CPEs
Adck1	0	1	CPEd
Adck2	4	4	0
Adck5	0	0	No AREs or CPEs
Adcy1	10	9	0.152003
Adcy10	0	0	No AREs or CPEs
Adcy2	0	3	CPEd
Adcy3	1	1	0
Adcy4	0	0	No AREs or CPEs
Adcy5	3	8	-1.41504
Adcy6	3	3	0
Adcy7	2	3	-0.584963
Adcy8	0	2	CPEd
Adcy9	0	0	No AREs or CPEs
Add1	1	4	-2
Add2	3	12	-2
Add3	4	13	-1.70044
Adgb	0	1	CPEd
Adgra1	1	3	-1.58496
Adgra2	2	3	-0.584963
Adgra3	2	2	0
Adgrb1	0	0	No AREs or CPEs
Adgrb3	2	4	-1
Adgre1	2	5	-1.32193
Adgre4	2	9	-2.16993
Adgre5	0	1	CPEd
Adgrf1	0	0	No AREs or CPEs
Adgrf2	3	2	0.584963
Adgrf3	1	0	AREd
Adgrf4	1	1	0
Adgrf5	7	9	-0.36257
Adgrg1	0	1	CPEd
Adgrg2	4	3	0.415037
Adgrg3	1	0	AREd
Adgrg5	1	0	AREd
Adgrg7	0	0	No AREs or CPEs
Adgrl1	0	0	No AREs or CPEs
Adgrl2	3	10	-1.73697
Adgrl4	2	8	-2
Adgrv1	3	1	1.58496
Adh4	2	0	AREd
Adh5	1	0	AREd
Adh7	7	10	-0.514573
Adhfe1	5	6	-0.263034
Adi1	2	4	-1
Adipor1	2	2	0
Adipor2	4	0	AREd
Adk	3	2	0.584963
Adm	2	2	0
Adm2	0	0	No AREs or CPEs
Adnp	2	2	0
Adnp2	2	5	-1.32193
Ado	7	13	-0.893085
Adora1	1	2	-1
Adora2a	0	4	CPEd
Adora2b	3	1	1.58496
Adora3	1	1	0
Adpgk	2	6	-1.58496
Adprh	1	4	-2
Adprhl2	0	1	CPEd
Adprm	0	2	CPEd
Adra1a	1	3	-1.58496
Adra1b	4	3	0.415037
Adra1d	0	0	No AREs or CPEs
Adra2a	0	2	CPEd
Adra2b	0	11	CPEd
Adra2c	0	1	CPEd
Adrb2	2	11	-2.45943
Adrm1	0	0	No AREs or CPEs
Adsl	2	2	0
Adss	1	2	-1
Adssl1	1	1	0
Adtrp	4	4	0
Aebp1	0	0	No AREs or CPEs
Aebp2	2	1	1
Aen	0	1	CPEd
Aes	0	0	No AREs or CPEs
AF067061	0	0	No AREs or CPEs
AF067063	0	0	No AREs or CPEs
AF366264	2	31	-3.9542
AF529169	11	12	-0.125531
Afap1	9	12	-0.415037
Afap1l1	0	1	CPEd
Afap1l2	1	2	-1
Afdn	1	0	AREd
Aff1	9	12	-0.415037
Aff2	0	3	CPEd
Aff3	4	8	-1
Aff4	21	19	0.14439
Afg1l	1	0	AREd
Afg3l1	1	0	AREd
Afg3l2	1	1	0
Afm	0	0	No AREs or CPEs
Afmid	0	0	No AREs or CPEs
Afp	0	1	CPEd
Aftph	6	4	0.584963
Aga	1	1	0
Agap1	9	4	1.16993
Agap2	1	1	0
Agap3	1	0	AREd
Agbl2	2	6	-1.58496
Agbl3	0	0	No AREs or CPEs
Agbl5	0	1	CPEd
Ager	0	0	No AREs or CPEs
Agfg2	1	2	-1
Aggf1	2	1	1
Agk	0	3	CPEd
Agl	5	9	-0.847997
Agmat	0	0	No AREs or CPEs
Agmo	1	1	0
Ago1	3	12	-2
Ago2	18	33	-0.874469
Ago3	22	39	-0.825971
Ago4	3	14	-2.22239
Agpat1	1	3	-1.58496
Agpat2	0	0	No AREs or CPEs
Agpat3	1	4	-2
Agpat4	0	0	No AREs or CPEs
Agpat5	11	33	-1.58496
Agps	11	18	-0.710493
Agrn	0	2	CPEd
Agrp	0	0	No AREs or CPEs
Agt	0	1	CPEd
Agtpbp1	3	3	0
Agtr1a	2	1	1
Agtrap	0	1	CPEd
Ahctf1	6	7	-0.222392
Ahcy	2	2	0
Ahcyl1	2	8	-2
Ahcyl2	3	8	-1.41504
Ahdc1	2	3	-0.584963
Ahi1	7	2	1.80735
Ahnak	0	5	CPEd
Ahr	7	11	-0.652077
Ahrr	2	2	0
Ahsa1	0	0	No AREs or CPEs
Ahsa2	4	4	0
AI182371	1	4	-2
AI314180	4	3	0.415037
AI413582	0	4	CPEd
AI429214	4	2	1
AI464131	2	1	1
AI467606	0	0	No AREs or CPEs
AI481877	1	0	AREd
AI593442	11	15	-0.447459
AI597479	3	14	-2.22239
AI606181	3	7	-1.22239
AI661453	0	0	No AREs or CPEs
AI837181	0	0	No AREs or CPEs
AI846148	2	1	1
AI854703	0	1	CPEd
AI987944	3	1	1.58496
Aicda	2	4	-1
Aida	6	9	-0.584963
Aif1	0	0	No AREs or CPEs
Aifm1	0	2	CPEd
Aifm2	0	0	No AREs or CPEs
Aifm3	0	0	No AREs or CPEs
Aig1	0	2	CPEd
Aim2	1	3	-1.58496
Aimp1	0	0	No AREs or CPEs
Aimp2	0	0	No AREs or CPEs
Aip	1	0	AREd
Aipl1	3	4	-0.415037
Aire	0	0	No AREs or CPEs
Ajuba	1	2	-1
Ak1	1	0	AREd
AK157302	3	4	-0.415037
Ak2	0	0	No AREs or CPEs
Ak3	3	4	-0.415037
Ak4	2	12	-2.58496
Ak5	2	2	0
Ak6	1	2	-1
Ak7	0	0	No AREs or CPEs
Ak8	0	0	No AREs or CPEs
Akap10	4	4	0
Akap11	18	14	0.36257
Akap12	1	2	-1
Akap13	2	9	-2.16993
Akap14	1	0	AREd
Akap17b	7	12	-0.777608
Akap2	7	15	-1.09954
Akap3	0	0	No AREs or CPEs
Akap5	7	20	-1.51457
Akap6	10	15	-0.584963
Akap7	3	2	0.584963
Akap8	2	11	-2.45943
Akap8l	0	0	No AREs or CPEs
Akap9	2	8	-2
Akip1	0	2	CPEd
Akirin1	3	7	-1.22239
Akirin2	3	3	0
Akna	1	2	-1
Akr1a1	0	0	No AREs or CPEs
Akr1b10	1	0	AREd
Akr1b3	0	1	CPEd
Akr1b7	1	1	0
Akr1b8	0	0	No AREs or CPEs
Akr1c12	0	0	No AREs or CPEs
Akr1c13	0	1	CPEd
Akr1c18	0	1	CPEd
Akr1c21	0	0	No AREs or CPEs
Akr1d1	1	9	-3.16993
Akr1e1	1	1	0
Akr7a5	0	0	No AREs or CPEs
Akt1	2	3	-0.584963
Akt1s1	0	2	CPEd
Akt2	0	0	No AREs or CPEs
Akt3	6	11	-0.874469
Aktip	4	3	0.415037
Alad	0	0	No AREs or CPEs
Alas1	0	1	CPEd
Alas2	0	0	No AREs or CPEs
Alcam	7	11	-0.652077
Aldh16a1	0	0	No AREs or CPEs
Aldh18a1	0	3	CPEd
Aldh1a1	0	1	CPEd
Aldh1a2	6	1	2.58496
Aldh1a3	4	2	1
Aldh1b1	1	0	AREd
Aldh1l1	1	2	-1
Aldh1l2	6	6	0
Aldh2	0	1	CPEd
Aldh3a1	0	0	No AREs or CPEs
Aldh3a2	3	0	AREd
Aldh3b1	0	0	No AREs or CPEs
Aldh3b2	0	0	No AREs or CPEs
Aldh3b3	3	6	-1
Aldh4a1	0	1	CPEd
Aldh5a1	3	14	-2.22239
Aldh6a1	5	6	-0.263034
Aldh7a1	2	0	AREd
Aldh8a1	0	3	CPEd
Aldh9a1	1	1	0
Aldoa	1	0	AREd
Aldoart1	2	0	AREd
Aldoart2	1	0	AREd
Aldob	0	2	CPEd
Aldoc	0	0	No AREs or CPEs
Alg1	1	1	0
Alg11	6	12	-1
Alg12	1	0	AREd
Alg13	2	4	-1
Alg14	4	2	1
Alg2	1	6	-2.58496
Alg3	0	0	No AREs or CPEs
Alg5	2	2	0
Alg6	5	5	0
Alg8	2	1	1
Alg9	1	1	0
Alkal1	5	5	0
Alkal2	1	3	-1.58496
Alkbh1	5	12	-1.26303
Alkbh2	1	0	AREd
Alkbh3	0	0	No AREs or CPEs
Alkbh4	0	2	CPEd
Alkbh5	5	9	-0.847997
Alkbh6	1	0	AREd
Alkbh7	1	0	AREd
Alkbh8	0	1	CPEd
Alms1	2	1	1
Alox12	2	0	AREd
Alox15	1	2	-1
Alox5	2	1	1
Alox5ap	2	0	AREd
Alox8	0	5	CPEd
Aloxe3	0	0	No AREs or CPEs
Alpk1	1	2	-1
Alpk2	1	0	AREd
Alpk3	1	2	-1
Alpl	1	2	-1
Als2	0	4	CPEd
Als2cl	2	3	-0.584963
Als2cr12	0	1	CPEd
Alx4	2	2	0
Alyref	1	14	-3.80735
Alyref2	0	5	CPEd
Amacr	3	4	-0.415037
Ambn	0	0	No AREs or CPEs
Ambp	0	0	No AREs or CPEs
Ambra1	1	1	0
Amd1	7	7	0
Amd2	7	7	0
Amdhd1	1	4	-2
Amdhd2	0	0	No AREs or CPEs
Amelx	0	0	No AREs or CPEs
Amer1	7	13	-0.893085
Amer2	2	0	AREd
Amfr	3	9	-1.58496
Amhr2	0	0	No AREs or CPEs
Amigo1	3	5	-0.736966
Amigo2	5	1	2.32193
Amigo3	0	1	CPEd
Ammecr1	8	21	-1.39232
Ammecr1l	3	15	-2.32193
Amn	0	1	CPEd
Amn1	6	5	0.263034
Amot	5	11	-1.1375
Amotl1	5	5	0
Amotl2	1	8	-3
Ampd1	0	0	No AREs or CPEs
Ampd2	1	0	AREd
Ampd3	0	6	CPEd
Amph	2	0	AREd
Amt	0	1	CPEd
Amy1	2	2	0
Amy2	4	6	-0.584963
Amy2a2	3	7	-1.22239
Amy2a3	3	7	-1.22239
Amy2a4	3	7	-1.22239
Amz1	0	1	CPEd
Amz2	0	4	CPEd
Anapc1	3	7	-1.22239
Anapc10	7	6	0.222392
Anapc11	1	2	-1
Anapc13	0	0	No AREs or CPEs
Anapc15	0	0	No AREs or CPEs
Anapc16	0	0	No AREs or CPEs
Anapc2	0	2	CPEd
Anapc4	0	10	CPEd
Anapc5	2	1	1
Anapc7	0	1	CPEd
Ang	0	1	CPEd
Angel1	0	3	CPEd
Angel2	3	11	-1.87447
Angpt1	7	6	0.222392
Angpt2	6	5	0.263034
Angpt4	0	0	No AREs or CPEs
Angptl1	2	3	-0.584963
Angptl2	0	1	CPEd
Angptl3	0	0	No AREs or CPEs
Angptl4	1	2	-1
Angptl6	0	0	No AREs or CPEs
Angptl7	1	3	-1.58496
Angptl8	0	0	No AREs or CPEs
Ank	4	2	1
Ank1	2	4	-1
Ankdd1b	3	5	-0.736966
Ankfy1	9	7	0.36257
Ankhd1	1	2	-1
Ankib1	7	15	-1.09954
Ankk1	0	0	No AREs or CPEs
Ankle1	0	1	CPEd
Ankle2	2	1	1
Ankmy1	0	0	No AREs or CPEs
Ankmy2	1	0	AREd
Ankra2	0	9	CPEd
Ankrd1	3	3	0
Ankrd10	1	8	-3
Ankrd12	6	14	-1.22239
Ankrd13a	0	2	CPEd
Ankrd13b	0	0	No AREs or CPEs
Ankrd13c	0	0	No AREs or CPEs
Ankrd13d	1	1	0
Ankrd16	0	2	CPEd
Ankrd17	5	7	-0.485427
Ankrd2	0	0	No AREs or CPEs
Ankrd22	2	1	1
Ankrd23	0	0	No AREs or CPEs
Ankrd24	1	0	AREd
Ankrd26	8	9	-0.169925
Ankrd27	1	4	-2
Ankrd28	5	16	-1.67807
Ankrd29	7	3	1.22239
Ankrd31	2	2	0
Ankrd33b	10	15	-0.584963
Ankrd34a	0	1	CPEd
Ankrd34b	6	8	-0.415037
Ankrd34c	9	12	-0.415037
Ankrd35	0	4	CPEd
Ankrd37	1	1	0
Ankrd39	1	2	-1
Ankrd40	3	5	-0.736966
Ankrd42	1	0	AREd
Ankrd44	5	15	-1.58496
Ankrd46	4	4	0
Ankrd49	1	6	-2.58496
Ankrd50	7	11	-0.652077
Ankrd52	5	9	-0.847997
Ankrd53	0	0	No AREs or CPEs
Ankrd54	0	1	CPEd
Ankrd55	2	2	0
Ankrd6	1	4	-2
Ankrd60	0	0	No AREs or CPEs
Ankrd61	0	0	No AREs or CPEs
Ankrd66	0	2	CPEd
Ankrd7	2	1	1
Ankrd9	0	0	No AREs or CPEs
Anks1	2	3	-0.584963
Anks3	0	0	No AREs or CPEs
Anks4b	2	4	-1
Anks6	0	1	CPEd
Ankzf1	0	1	CPEd
Anln	8	4	1
Ano10	0	0	No AREs or CPEs
Ano3	10	10	0
Ano6	2	6	-1.58496
Ano7	0	1	CPEd
Ano8	2	3	-0.584963
Anp32a	0	5	CPEd
Anp32b	0	2	CPEd
Anp32e	6	15	-1.32193
Anpep	1	0	AREd
Antxr1	5	4	0.321928
Antxr2	0	3	CPEd
Anxa1	0	2	CPEd
Anxa10	1	2	-1
Anxa11	1	2	-1
Anxa2	0	1	CPEd
Anxa3	0	1	CPEd
Anxa4	2	3	-0.584963
Anxa5	1	1	0
Anxa6	0	0	No AREs or CPEs
Anxa7	1	3	-1.58496
Anxa8	0	0	No AREs or CPEs
Anxa9	0	3	CPEd
Aoah	2	1	1
Aoc1	0	1	CPEd
Aoc2	0	0	No AREs or CPEs
Aoc3	1	2	-1
Aox1	2	0	AREd
Aox2	1	11	-3.45943
Aox3	2	1	1
Ap1ar	7	8	-0.192645
Ap1b1	1	0	AREd
Ap1g1	5	13	-1.37851
Ap1g2	1	0	AREd
Ap1m1	0	0	No AREs or CPEs
Ap1m2	0	2	CPEd
Ap1s2	10	16	-0.678072
Ap1s3	6	8	-0.415037
Ap2a1	0	3	CPEd
Ap2a2	1	3	-1.58496
Ap2b1	2	3	-0.584963
Ap2m1	2	6	-1.58496
Ap2s1	0	0	No AREs or CPEs
Ap3b1	1	1	0
Ap3b2	1	0	AREd
Ap3d1	1	1	0
Ap3m1	13	8	0.70044
Ap3m2	2	5	-1.32193
Ap3s1	1	6	-2.58496
Ap3s2	2	8	-2
Ap4b1	1	0	AREd
Ap4e1	4	6	-0.584963
Ap4m1	0	1	CPEd
Ap4s1	0	1	CPEd
Ap5b1	0	0	No AREs or CPEs
Ap5m1	8	5	0.678072
Ap5s1	0	1	CPEd
Ap5z1	1	0	AREd
Apaf1	3	11	-1.87447
Apba1	4	13	-1.70044
Apba2	1	6	-2.58496
Apba3	1	0	AREd
Apbb1	0	0	No AREs or CPEs
Apbb1ip	0	1	CPEd
Apbb2	0	2	CPEd
Apc	0	0	No AREs or CPEs
Apc2	0	2	CPEd
Apcdd1	0	0	No AREs or CPEs
Apeh	0	0	No AREs or CPEs
Apex1	0	1	CPEd
Apex2	1	2	-1
Aph1a	0	2	CPEd
Aph1b	7	9	-0.36257
Aph1c	7	13	-0.893085
Api5	2	6	-1.58496
Apip	0	1	CPEd
Aplf	1	0	AREd
Apln	4	7	-0.807355
Aplnr	1	5	-2.32193
Aplp1	2	0	AREd
Aplp2	0	7	CPEd
Apmap	1	1	0
Apoa1	0	0	No AREs or CPEs
Apoa2	0	0	No AREs or CPEs
Apobec1	1	2	-1
Apobec2	0	0	No AREs or CPEs
Apobec3	1	8	-3
Apobec4	0	1	CPEd
Apobr	1	0	AREd
Apoc1	0	0	No AREs or CPEs
Apoc2	0	0	No AREs or CPEs
Apoc4	0	0	No AREs or CPEs
Apod	4	3	0.415037
Apoe	0	0	No AREs or CPEs
Apof	0	0	No AREs or CPEs
Apoh	0	0	No AREs or CPEs
Apol10b	0	3	CPEd
Apol11b	1	4	-2
Apol6	0	1	CPEd
Apol7a	0	1	CPEd
Apol7b	1	0	AREd
Apol7c	0	0	No AREs or CPEs
Apol7e	1	0	AREd
Apol8	0	2	CPEd
Apol9a	0	0	No AREs or CPEs
Apol9b	0	0	No AREs or CPEs
Apold1	12	12	0
Apom	0	0	No AREs or CPEs
Apon	1	5	-2.32193
Apoo	1	0	AREd
Apoo-ps	1	0	AREd
Apool	1	1	0
App	3	4	-0.415037
Appbp2	13	22	-0.758992
Appl1	14	32	-1.19265
Appl2	5	4	0.321928
Aprt	0	1	CPEd
Aptx	6	9	-0.584963
Aqp1	2	1	1
Aqp11	3	8	-1.41504
Aqp3	0	2	CPEd
Aqp7	1	2	-1
Aqp8	0	1	CPEd
Aqp9	1	4	-2
Aqr	1	2	-1
Ar	11	19	-0.788496
Araf	0	2	CPEd
Arap1	0	0	No AREs or CPEs
Arap2	8	10	-0.321928
Arap3	0	1	CPEd
Arc	0	1	CPEd
Arcn1	3	2	0.584963
Arel1	1	4	-2
Arf1	2	5	-1.32193
Arf2	1	4	-2
Arf3	2	5	-1.32193
Arf4	4	5	-0.321928
Arf5	1	1	0
Arf6	7	11	-0.652077
Arfgap1	0	0	No AREs or CPEs
Arfgap2	0	2	CPEd
Arfgap3	1	4	-2
Arfgef1	3	3	0
Arfgef2	4	10	-1.32193
Arfgef3	6	5	0.263034
Arfip2	0	0	No AREs or CPEs
Arfrp1	1	6	-2.58496
Arg1	1	0	AREd
Arg2	1	1	0
Arglu1	8	17	-1.08746
Arhgap1	3	3	0
Arhgap10	1	0	AREd
Arhgap11a	4	5	-0.321928
Arhgap12	4	4	0
Arhgap15	1	11	-3.45943
Arhgap17	1	1	0
Arhgap18	5	6	-0.263034
Arhgap19	4	7	-0.807355
Arhgap20	6	15	-1.32193
Arhgap21	2	5	-1.32193
Arhgap22	0	0	No AREs or CPEs
Arhgap23	2	1	1
Arhgap24	2	5	-1.32193
Arhgap25	2	1	1
Arhgap26	3	9	-1.58496
Arhgap27	3	0	AREd
Arhgap28	5	3	0.736966
Arhgap29	9	17	-0.917538
Arhgap30	4	0	AREd
Arhgap31	3	8	-1.41504
Arhgap32	16	19	-0.247928
Arhgap33	0	1	CPEd
Arhgap35	0	8	CPEd
Arhgap39	2	2	0
Arhgap4	1	2	-1
Arhgap42	3	13	-2.11548
Arhgap44	1	0	AREd
Arhgap45	0	0	No AREs or CPEs
Arhgap5	1	3	-1.58496
Arhgap6	3	8	-1.41504
Arhgap8	0	0	No AREs or CPEs
Arhgap9	0	0	No AREs or CPEs
Arhgdia	1	0	AREd
Arhgdib	0	0	No AREs or CPEs
Arhgdig	0	0	No AREs or CPEs
Arhgef1	0	2	CPEd
Arhgef10	3	3	0
Arhgef10l	1	3	-1.58496
Arhgef11	0	2	CPEd
Arhgef12	7	19	-1.44057
Arhgef15	1	0	AREd
Arhgef17	4	2	1
Arhgef18	3	7	-1.22239
Arhgef19	0	2	CPEd
Arhgef2	3	5	-0.736966
Arhgef25	0	1	CPEd
Arhgef26	4	8	-1
Arhgef28	1	0	AREd
Arhgef3	3	3	0
Arhgef33	2	0	AREd
Arhgef37	0	0	No AREs or CPEs
Arhgef38	13	22	-0.758992
Arhgef39	2	1	1
Arhgef4	1	0	AREd
Arhgef40	1	0	AREd
Arhgef5	0	1	CPEd
Arhgef6	2	2	0
Arhgef7	3	6	-1
Arhgef9	6	3	1
Arid1a	3	4	-0.415037
Arid1b	10	14	-0.485427
Arid2	8	20	-1.32193
Arid3a	1	12	-3.58496
Arid3b	3	4	-0.415037
Arid3c	1	0	AREd
Arid4a	2	13	-2.70044
Arid4b	5	14	-1.48543
Arid5a	0	0	No AREs or CPEs
Arid5b	1	6	-2.58496
Arih1	13	20	-0.621488
Arih2	1	3	-1.58496
Arl1	1	5	-2.32193
Arl10	0	0	No AREs or CPEs
Arl11	0	1	CPEd
Arl13a	0	0	No AREs or CPEs
Arl13b	5	11	-1.1375
Arl14	1	5	-2.32193
Arl14ep	0	0	No AREs or CPEs
Arl15	9	10	-0.152003
Arl16	0	0	No AREs or CPEs
Arl2	0	0	No AREs or CPEs
Arl2bp	1	5	-2.32193
Arl3	0	0	No AREs or CPEs
Arl4a	0	3	CPEd
Arl4c	2	5	-1.32193
Arl4d	0	5	CPEd
Arl5a	13	12	0.115477
Arl5b	21	34	-0.695145
Arl5c	0	1	CPEd
Arl6ip1	1	5	-2.32193
Arl6ip4	0	0	No AREs or CPEs
Arl6ip5	0	4	CPEd
Arl6ip6	9	14	-0.63743
Arl8a	3	5	-0.736966
Arl8b	8	9	-0.169925
Arl9	0	0	No AREs or CPEs
Armc1	5	10	-1
Armc10	3	3	0
Armc2	3	3	0
Armc3	0	0	No AREs or CPEs
Armc4	1	1	0
Armc5	0	0	No AREs or CPEs
Armc6	0	0	No AREs or CPEs
Armc7	0	2	CPEd
Armc8	5	6	-0.263034
Armc9	1	1	0
Armcx1	3	4	-0.415037
Armcx2	0	1	CPEd
Armcx3	6	6	0
Armcx4	0	3	CPEd
Armcx5	1	4	-2
Armcx6	0	1	CPEd
Armt1	2	2	0
Arnt	0	1	CPEd
Arnt2	3	3	0
Arntl	0	5	CPEd
Arntl2	3	7	-1.22239
Arpc1a	1	1	0
Arpc1b	1	0	AREd
Arpc2	0	1	CPEd
Arpc3	0	0	No AREs or CPEs
Arpc4	0	2	CPEd
Arpc5	3	6	-1
Arpc5l	1	1	0
Arpin	0	6	CPEd
Arpp19	10	14	-0.485427
Arrb1	1	14	-3.80735
Arrb2	0	0	No AREs or CPEs
Arrdc1	0	0	No AREs or CPEs
Arrdc2	0	2	CPEd
Arrdc3	7	14	-1
Arrdc4	4	8	-1
Arrdc5	0	0	No AREs or CPEs
Arsa	0	0	No AREs or CPEs
Arsb	3	7	-1.22239
Arsg	0	0	No AREs or CPEs
Arsi	0	0	No AREs or CPEs
Arsk	4	10	-1.32193
Art2a-ps	2	1	1
Art3	1	1	0
Art4	2	1	1
Art5	0	0	No AREs or CPEs
Artn	2	0	AREd
Arv1	0	3	CPEd
Arvcf	2	2	0
Arxes1	3	3	0
Arxes2	1	5	-2.32193
As3mt	1	0	AREd
Asah1	2	6	-1.58496
Asah2	11	7	0.652077
Asap1	1	2	-1
Asap2	7	7	0
Asap3	0	1	CPEd
Asb1	2	2	0
Asb10	0	1	CPEd
Asb11	1	1	0
Asb13	0	1	CPEd
Asb14	0	0	No AREs or CPEs
Asb16	1	2	-1
Asb17	2	2	0
Asb18	0	2	CPEd
Asb2	0	1	CPEd
Asb3	0	0	No AREs or CPEs
Asb4	6	8	-0.415037
Asb5	3	4	-0.415037
Asb6	2	1	1
Asb7	11	9	0.289507
Asb8	0	0	No AREs or CPEs
Ascc1	0	0	No AREs or CPEs
Ascc2	0	0	No AREs or CPEs
Ascc3	3	2	0.584963
Ascl2	0	3	CPEd
Ascl3	0	0	No AREs or CPEs
Ascl4	0	2	CPEd
Asf1a	5	8	-0.678072
Asf1b	0	2	CPEd
Asgr1	1	0	AREd
Asgr2	1	0	AREd
Ash1l	1	8	-3
Ash2l	1	9	-3.16993
Asic1	0	1	CPEd
Asl	0	0	No AREs or CPEs
Asmt	0	0	No AREs or CPEs
Asna1	0	0	No AREs or CPEs
Asns	0	0	No AREs or CPEs
Asnsd1	0	0	No AREs or CPEs
Aspdh	0	0	No AREs or CPEs
Asph	8	12	-0.584963
Asphd1	1	3	-1.58496
Aspm	2	3	-0.584963
Aspn	2	3	-0.584963
Asprv1	0	0	No AREs or CPEs
Aspscr1	0	0	No AREs or CPEs
Asrgl1	3	6	-1
Ass1	0	0	No AREs or CPEs
Aste1	3	3	0
Astl	0	0	No AREs or CPEs
Astn1	4	9	-1.16993
Astn2	0	1	CPEd
Asxl1	4	3	0.415037
Asxl2	0	1	CPEd
Asxl3	13	8	0.70044
Atad1	7	11	-0.652077
Atad2	4	9	-1.16993
Atad3a	0	1	CPEd
Atad5	1	12	-3.58496
Atat1	1	0	AREd
Ate1	6	12	-1
Atf1	2	12	-2.58496
Atf2	5	17	-1.76553
Atf3	3	1	1.58496
Atf4	0	1	CPEd
Atf5	1	1	0
Atf6	7	12	-0.777608
Atf6b	0	0	No AREs or CPEs
Atf7	1	0	AREd
Atf7ip	9	17	-0.917538
Atf7ip2	0	8	CPEd
Atg10	1	3	-1.58496
Atg101	0	1	CPEd
Atg12	7	7	0
Atg13	1	2	-1
Atg14	2	7	-1.80735
Atg16l1	1	2	-1
Atg16l2	5	14	-1.48543
Atg2a	0	0	No AREs or CPEs
Atg2b	6	7	-0.222392
Atg3	2	4	-1
Atg4a	0	2	CPEd
Atg4a-ps	0	2	CPEd
Atg4b	4	0	AREd
Atg4c	3	5	-0.736966
Atg4d	2	2	0
Atg5	2	6	-1.58496
Atg7	1	1	0
Atg9b	0	1	CPEd
Atic	0	9	CPEd
Atl1	1	6	-2.58496
Atl2	5	11	-1.1375
Atl3	14	22	-0.652077
Atm	0	0	No AREs or CPEs
Atmin	2	4	-1
Atn1	1	1	0
Atoh8	0	0	No AREs or CPEs
Atox1	0	0	No AREs or CPEs
Atp10a	2	5	-1.32193
Atp10b	3	4	-0.415037
Atp10d	5	4	0.321928
Atp11a	3	8	-1.41504
Atp11b	6	6	0
Atp11c	13	10	0.378512
Atp13a1	0	1	CPEd
Atp13a2	0	0	No AREs or CPEs
Atp13a3	10	23	-1.20163
Atp13a4	0	0	No AREs or CPEs
Atp13a5	1	2	-1
Atp1a1	0	3	CPEd
Atp1a2	2	1	1
Atp1a3	0	2	CPEd
Atp1a4	0	0	No AREs or CPEs
Atp1b1	6	7	-0.222392
Atp1b2	1	1	0
Atp1b3	5	5	0
Atp1b4	9	7	0.36257
Atp23	0	1	CPEd
Atp2a1	1	0	AREd
Atp2a2	8	11	-0.459432
Atp2a3	0	1	CPEd
Atp2b1	7	17	-1.28011
Atp2b2	0	0	No AREs or CPEs
Atp2b3	0	1	CPEd
Atp2b4	8	10	-0.321928
Atp2c1	4	15	-1.90689
Atp2c2	2	1	1
Atp4a	0	0	No AREs or CPEs
Atp4b	0	0	No AREs or CPEs
Atp5a1	3	3	0
Atp5b	4	0	AREd
Atp5c1	0	0	No AREs or CPEs
Atp5d	0	0	No AREs or CPEs
Atp5e	0	0	No AREs or CPEs
Atp5f1	1	0	AREd
Atp5g1	3	9	-1.58496
Atp5g2	0	0	No AREs or CPEs
Atp5g3	0	0	No AREs or CPEs
Atp5j	0	0	No AREs or CPEs
Atp5j2	0	0	No AREs or CPEs
Atp5k	0	0	No AREs or CPEs
Atp5l	0	0	No AREs or CPEs
Atp5o	0	0	No AREs or CPEs
Atp5s	1	2	-1
Atp6ap1	1	2	-1
Atp6ap2	5	5	0
Atp6v0a1	0	0	No AREs or CPEs
Atp6v0a2	3	6	-1
Atp6v0b	1	0	AREd
Atp6v0c	0	0	No AREs or CPEs
Atp6v0d1	0	0	No AREs or CPEs
Atp6v0d2	4	6	-0.584963
Atp6v0e	0	0	No AREs or CPEs
Atp6v0e2	2	1	1
Atp6v1a	4	6	-0.584963
Atp6v1b1	1	1	0
Atp6v1b2	1	2	-1
Atp6v1c1	4	1	2
Atp6v1c2	1	1	0
Atp6v1d	4	0	AREd
Atp6v1e1	2	0	AREd
Atp6v1e2	0	0	No AREs or CPEs
Atp6v1f	1	0	AREd
Atp6v1g1	2	2	0
Atp6v1g2	2	1	1
Atp6v1g3	2	7	-1.80735
Atp6v1h	3	2	0.584963
Atp7a	0	2	CPEd
Atp7b	2	3	-0.584963
Atp8a1	9	20	-1.152
Atp8a2	0	1	CPEd
Atp8b1	7	21	-1.58496
Atp8b2	1	8	-3
Atp8b3	0	0	No AREs or CPEs
Atp8b4	4	3	0.415037
Atp8b5	1	2	-1
Atp9a	0	0	No AREs or CPEs
Atp9b	0	2	CPEd
Atpaf1	1	2	-1
Atpaf2	0	6	CPEd
Atpif1	0	0	No AREs or CPEs
Atr	0	0	No AREs or CPEs
Atraid	1	0	AREd
Atrip	0	0	No AREs or CPEs
Atrn	7	12	-0.777608
Atrnl1	1	7	-2.80735
Atrx	8	13	-0.70044
Atxn1	7	43	-2.61891
Atxn10	0	1	CPEd
Atxn1l	4	13	-1.70044
Atxn2	3	5	-0.736966
Atxn2l	1	1	0
Atxn3	11	24	-1.12553
Atxn7	14	18	-0.36257
Atxn7l2	0	1	CPEd
Atxn7l3	2	3	-0.584963
Atxn7l3b	4	9	-1.16993
AU018091	6	7	-0.222392
AU019823	5	7	-0.485427
AU021092	0	0	No AREs or CPEs
AU022252	9	6	0.584963
AU040320	0	2	CPEd
AU041133	1	1	0
Auh	3	2	0.584963
Aunip	0	0	No AREs or CPEs
Aup1	0	0	No AREs or CPEs
Aurka	1	3	-1.58496
Aurkaip1	0	0	No AREs or CPEs
Aurkb	1	2	-1
Aurkc	0	1	CPEd
AV320801	7	9	-0.36257
Aven	5	7	-0.485427
Avil	1	0	AREd
Avl9	15	16	-0.0931094
Avpi1	0	1	CPEd
Avpr1b	0	1	CPEd
Avpr2	0	0	No AREs or CPEs
AW011738	2	0	AREd
AW146154	2	3	-0.584963
AW209491	3	0	AREd
AW549877	13	21	-0.691878
AW554918	8	8	0
Awat1	0	1	CPEd
Awat2	0	2	CPEd
Axdnd1	0	0	No AREs or CPEs
Axin1	0	1	CPEd
Axin2	3	5	-0.736966
Axl	0	5	CPEd
AY074887	0	1	CPEd
AY358078	0	0	No AREs or CPEs
Azi2	3	6	-1
Azin1	11	9	0.289507
Azin2	1	0	AREd
B020004C17Rik	2	5	-1.32193
B020004J07Rik	0	1	CPEd
B020011L13Rik	9	7	0.36257
B130006D01Rik	1	0	AREd
B230118H07Rik	0	2	CPEd
B230217C12Rik	2	0	AREd
B230219D22Rik	16	17	-0.0874628
B230307C23Rik	3	2	0.584963
B2m	1	3	-1.58496
B3galnt1	3	2	0.584963
B3galnt2	6	7	-0.222392
B3galt1	5	2	1.32193
B3galt2	30	28	0.0995357
B3galt4	0	0	No AREs or CPEs
B3galt5	8	11	-0.459432
B3galt6	4	11	-1.45943
B3gat2	9	4	1.16993
B3gat3	0	0	No AREs or CPEs
B3glct	5	9	-0.847997
B3gnt2	2	8	-2
B3gnt3	1	2	-1
B3gnt4	1	1	0
B3gnt5	1	0	AREd
B3gnt6	1	0	AREd
B3gnt7	1	1	0
B3gnt8	1	0	AREd
B3gnt9	1	0	AREd
B3gntl1	2	0	AREd
B430203G13Rik	0	1	CPEd
B430218F22Rik	1	1	0
B430305J03Rik	2	2	0
B430306N03Rik	1	0	AREd
B4galnt1	0	1	CPEd
B4galnt2	0	0	No AREs or CPEs
B4galt1	1	12	-3.58496
B4galt2	0	1	CPEd
B4galt3	2	1	1
B4galt4	0	2	CPEd
B4galt5	1	15	-3.90689
B4galt6	10	18	-0.847997
B4galt7	1	4	-2
B4gat1	0	0	No AREs or CPEs
B630019K06Rik	3	4	-0.415037
B930094E09Rik	0	1	CPEd
B9d1	0	1	CPEd
B9d2	0	0	No AREs or CPEs
Babam1	0	2	CPEd
Babam2	0	0	No AREs or CPEs
Bace1	4	5	-0.321928
Bace2	1	2	-1
Bach1	5	8	-0.678072
Bach2	10	19	-0.925999
Bad	0	0	No AREs or CPEs
Bag1	0	0	No AREs or CPEs
Bag2	1	3	-1.58496
Bag3	3	2	0.584963
Bag4	13	11	0.241008
Bag5	2	0	AREd
Bag6	1	0	AREd
Bahcc1	1	6	-2.58496
Bahd1	1	3	-1.58496
Baiap2	0	1	CPEd
Baiap2l1	1	6	-2.58496
Baiap2l2	0	1	CPEd
Baiap3	1	1	0
Bak1	0	1	CPEd
Bambi	4	16	-2
Banf1	0	1	CPEd
Bank1	2	3	-0.584963
Banp	4	3	0.415037
Bap1	0	1	CPEd
Bard1	9	15	-0.736966
Barhl1	1	1	0
Barhl2	1	3	-1.58496
Barx2	0	3	CPEd
Basp1	1	2	-1
Batf	0	0	No AREs or CPEs
Batf2	0	0	No AREs or CPEs
Batf3	0	0	No AREs or CPEs
Bax	0	1	CPEd
Baz1a	7	9	-0.36257
Baz1b	4	4	0
Baz2a	4	9	-1.16993
Baz2b	5	8	-0.678072
BB287469	1	3	-1.58496
Bbc3	0	2	CPEd
Bbip1	7	4	0.807355
Bbof1	0	4	CPEd
Bbs1	1	3	-1.58496
Bbs10	1	0	AREd
Bbs12	0	1	CPEd
Bbs2	3	2	0.584963
Bbs4	0	1	CPEd
Bbs5	3	5	-0.736966
Bbs7	1	4	-2
Bbs9	1	0	AREd
Bbx	14	27	-0.947533
BC003331	2	0	AREd
BC003965	4	5	-0.321928
BC004004	0	0	No AREs or CPEs
BC005537	3	10	-1.73697
BC005561	0	0	No AREs or CPEs
BC005624	1	2	-1
BC017158	0	2	CPEd
BC017643	0	2	CPEd
BC024139	0	0	No AREs or CPEs
BC024978	0	0	No AREs or CPEs
BC025446	0	1	CPEd
BC025920	0	0	No AREs or CPEs
BC029722	2	2	0
BC030336	10	23	-1.20163
BC030499	0	0	No AREs or CPEs
BC030867	0	0	No AREs or CPEs
BC031181	5	1	2.32193
BC034090	1	1	0
BC035044	4	1	2
BC035947	1	3	-1.58496
BC037034	0	2	CPEd
BC048403	4	5	-0.321928
BC048507	0	0	No AREs or CPEs
BC049352	3	0	AREd
BC049730	0	0	No AREs or CPEs
BC049762	0	0	No AREs or CPEs
BC051019	0	2	CPEd
BC051142	0	0	No AREs or CPEs
BC052040	2	7	-1.80735
BC055324	0	1	CPEd
BC100530	0	0	No AREs or CPEs
BC106179	4	7	-0.807355
BC117090	0	0	No AREs or CPEs
Bcam	0	0	No AREs or CPEs
Bcan	0	0	No AREs or CPEs
Bcap29	4	2	1
Bcap31	0	2	CPEd
Bcar1	2	0	AREd
Bcar3	3	3	0
Bcas1	2	1	1
Bcas2	0	5	CPEd
Bcas3	0	1	CPEd
Bcat1	7	14	-1
Bcat2	0	0	No AREs or CPEs
Bccip	1	2	-1
Bcdin3d	1	0	AREd
Bckdha	0	0	No AREs or CPEs
Bckdhb	0	2	CPEd
Bckdk	2	0	AREd
Bcl10	2	7	-1.80735
Bcl11a	7	25	-1.8365
Bcl2	13	8	0.70044
Bcl2a1a	0	1	CPEd
Bcl2a1b	1	1	0
Bcl2a1c	0	0	No AREs or CPEs
Bcl2a1d	1	1	0
Bcl2l1	1	2	-1
Bcl2l11	6	8	-0.415037
Bcl2l12	0	4	CPEd
Bcl2l13	11	8	0.459432
Bcl2l14	0	0	No AREs or CPEs
Bcl2l15	0	0	No AREs or CPEs
Bcl2l2	4	9	-1.16993
Bcl3	0	2	CPEd
Bcl6	1	5	-2.32193
Bcl6b	2	6	-1.58496
Bcl7a	6	6	0
Bcl7b	1	2	-1
Bcl7c	0	0	No AREs or CPEs
Bcl9	3	8	-1.41504
Bcl9l	0	2	CPEd
Bclaf1	9	11	-0.289507
Bclaf3	4	4	0
Bco1	1	0	AREd
Bco2	1	2	-1
Bcor	3	7	-1.22239
Bcorl1	3	9	-1.58496
Bcr	3	5	-0.736966
Bcs1l	0	1	CPEd
Bdh1	0	0	No AREs or CPEs
Bdh2	0	1	CPEd
Bdkrb1	0	0	No AREs or CPEs
Bdnf	8	18	-1.16993
Bdp1	0	0	No AREs or CPEs
Bean1	2	1	1
Becn1	8	10	-0.321928
Begain	0	1	CPEd
Bend3	7	13	-0.893085
Bend4	7	6	0.222392
Bend5	0	3	CPEd
Bend6	2	4	-1
Bend7	5	3	0.736966
Best1	0	0	No AREs or CPEs
Best2	0	0	No AREs or CPEs
Best3	0	0	No AREs or CPEs
Bet1	4	4	0
Bet1l	0	0	No AREs or CPEs
Bex1	2	3	-0.584963
Bex2	2	1	1
Bex3	0	0	No AREs or CPEs
Bex4	2	1	1
Bex6	3	1	1.58496
Bfar	2	3	-0.584963
Bfsp1	0	0	No AREs or CPEs
Bglap	0	0	No AREs or CPEs
Bglap2	0	0	No AREs or CPEs
Bglap3	0	0	No AREs or CPEs
Bgn	1	0	AREd
Bhlha15	0	4	CPEd
Bhlha9	0	0	No AREs or CPEs
Bhlhb9	0	2	CPEd
Bhlhe40	0	5	CPEd
Bhlhe41	10	18	-0.847997
Bhmt2	0	2	CPEd
Bicc1	8	5	0.678072
Bicd2	2	10	-2.32193
Bicdl1	0	2	CPEd
Bicdl2	1	0	AREd
Bicra	0	0	No AREs or CPEs
Bicral	2	12	-2.58496
Bid	0	3	CPEd
Bik	1	2	-1
Bin1	0	1	CPEd
Bin2	0	1	CPEd
Bin3	0	3	CPEd
Birc2	1	0	AREd
Birc3	4	5	-0.321928
Birc5	0	2	CPEd
Bivm	3	7	-1.22239
Blcap	1	5	-2.32193
Blk	0	0	No AREs or CPEs
Blm	1	1	0
Blmh	0	1	CPEd
Blnk	1	0	AREd
Bloc1s1	0	0	No AREs or CPEs
Bloc1s2	1	3	-1.58496
Bloc1s3	4	8	-1
Bloc1s4	4	3	0.415037
Bloc1s5	0	2	CPEd
Bloc1s6	1	7	-2.80735
Blvra	0	0	No AREs or CPEs
Blvrb	0	0	No AREs or CPEs
Blzf1	6	5	0.263034
Bmf	1	5	-2.32193
Bmi1	6	15	-1.32193
Bmp1	0	1	CPEd
Bmp10	9	8	0.169925
Bmp15	6	8	-0.415037
Bmp2	7	4	0.807355
Bmp2k	7	12	-0.777608
Bmp3	10	7	0.514573
Bmp4	0	1	CPEd
Bmp5	4	7	-0.807355
Bmp6	0	2	CPEd
Bmp7	4	3	0.415037
Bmp8a	0	0	No AREs or CPEs
Bmp8b	5	1	2.32193
Bmper	5	5	0
Bmpr1a	8	18	-1.16993
Bmpr2	32	46	-0.523562
Bms1	0	1	CPEd
Bmt2	11	11	0
Bmyc	0	0	No AREs or CPEs
Bnc2	1	4	-2
Bnip1	1	0	AREd
Bnip2	0	0	No AREs or CPEs
Bnip3	5	4	0.321928
Bnip3l	4	10	-1.32193
Bnipl	2	1	1
Boc	3	0	AREd
Bod1	0	2	CPEd
Bod1l	3	20	-2.73697
Bok	1	0	AREd
Bola1	0	0	No AREs or CPEs
Bola2	1	0	AREd
Bola3	1	1	0
Bop1	0	0	No AREs or CPEs
Bora	3	2	0.584963
Borcs5	0	0	No AREs or CPEs
Borcs6	0	2	CPEd
Borcs7	3	2	0.584963
Borcs8	0	0	No AREs or CPEs
Bpgm	2	5	-1.32193
Bphl	1	0	AREd
Bpi	1	0	AREd
Bpifa6	0	0	No AREs or CPEs
Bpifb2	0	1	CPEd
Bpifb6	0	0	No AREs or CPEs
Bpifc	1	3	-1.58496
Bpnt1	6	12	-1
Bptf	5	10	-1
Braf	26	28	-0.106915
Brap	3	3	0
Brat1	0	0	No AREs or CPEs
Brca1	0	2	CPEd
Brca2	1	1	0
Brcc3	6	6	0
Brd1	5	8	-0.678072
Brd2	1	3	-1.58496
Brd3	5	10	-1
Brd4	0	9	CPEd
Brd7	2	11	-2.45943
Brd8	0	2	CPEd
Brd9	1	4	-2
Brdt	1	12	-3.58496
Brf1	0	1	CPEd
Brf2	1	0	AREd
Bri3	0	4	CPEd
Bri3bp	5	21	-2.07039
Bricd5	0	0	No AREs or CPEs
Brinp1	0	0	No AREs or CPEs
Brinp2	1	5	-2.32193
Brip1	12	13	-0.115477
Brix1	3	5	-0.736966
Brk1	0	1	CPEd
Brms1	2	0	AREd
Brms1l	4	6	-0.584963
Brox	6	6	0
Brpf1	1	0	AREd
Brpf3	1	2	-1
Brsk1	3	2	0.584963
Brsk2	3	7	-1.22239
Brwd3	21	48	-1.19265
Bscl2	0	1	CPEd
Bsdc1	1	5	-2.32193
Bsg	1	1	0
Bsn	4	6	-0.584963
Bspry	0	0	No AREs or CPEs
Bst1	5	2	1.32193
Bst2	0	0	No AREs or CPEs
Bsx	0	0	No AREs or CPEs
Btaf1	3	6	-1
Btbd1	4	6	-0.584963
Btbd10	5	3	0.736966
Btbd11	0	4	CPEd
Btbd16	1	3	-1.58496
Btbd17	0	0	No AREs or CPEs
Btbd18	0	0	No AREs or CPEs
Btbd19	0	1	CPEd
Btbd2	0	1	CPEd
Btbd3	2	10	-2.32193
Btbd6	1	0	AREd
Btbd7	1	6	-2.58496
Btbd9	4	2	1
Btc	4	12	-1.58496
Btd	0	2	CPEd
Btf3	0	2	CPEd
Btf3l4	1	1	0
Btg1	11	22	-1
Btg1-ps2	1	1	0
Btg2	5	5	0
Btg3	4	3	0.415037
Btk	0	1	CPEd
Btla	5	4	0.321928
Btn2a2	0	0	No AREs or CPEs
Btnl10	3	2	0.584963
Btnl2	0	1	CPEd
Btrc	5	5	0
Bub1	2	1	1
Bub1b	0	4	CPEd
Bub3	2	1	1
Bud13	1	1	0
Bud23	0	1	CPEd
Bud31	0	0	No AREs or CPEs
Bysl	1	3	-1.58496
Bzw1	0	0	No AREs or CPEs
Bzw2	0	2	CPEd
C130026I21Rik	3	0	AREd
C130050O18Rik	0	0	No AREs or CPEs
C130060K24Rik	3	3	0
C130073F10Rik	0	1	CPEd
C130074G19Rik	2	0	AREd
C130079G13Rik	3	5	-0.736966
C1d	7	13	-0.893085
C1galt1	15	18	-0.263034
C1galt1c1	4	1	2
C1qa	0	0	No AREs or CPEs
C1qb	0	0	No AREs or CPEs
C1qbp	2	1	1
C1qc	1	1	0
C1ql1	0	1	CPEd
C1ql2	0	1	CPEd
C1ql3	3	3	0
C1ql4	0	0	No AREs or CPEs
C1qtnf1	0	1	CPEd
C1qtnf12	0	2	CPEd
C1qtnf3	5	4	0.321928
C1qtnf4	0	0	No AREs or CPEs
C1qtnf5	0	0	No AREs or CPEs
C1qtnf6	0	0	No AREs or CPEs
C1qtnf7	4	9	-1.16993
C1qtnf9	0	1	CPEd
C1ra	2	1	1
C1rb	0	0	No AREs or CPEs
C1rl	4	3	0.415037
C1s1	2	1	1
C1s2	2	0	AREd
C2	0	0	No AREs or CPEs
C2cd2	7	8	-0.192645
C2cd2l	5	1	2.32193
C2cd3	1	3	-1.58496
C2cd4c	0	5	CPEd
C2cd5	0	0	No AREs or CPEs
C2cd6	0	0	No AREs or CPEs
C3	0	0	No AREs or CPEs
C330007P06Rik	0	0	No AREs or CPEs
C330011M18Rik	0	3	CPEd
C330018D20Rik	5	8	-0.678072
C330021F23Rik	0	0	No AREs or CPEs
C330027C09Rik	6	7	-0.222392
C3ar1	4	7	-0.807355
C430049E01Rik	5	0	AREd
C4b	0	0	No AREs or CPEs
C530008M17Rik	7	9	-0.36257
C5ar1	2	3	-0.584963
C5ar2	4	6	-0.584963
C730034F03Rik	0	0	No AREs or CPEs
C77080	0	2	CPEd
C87436	0	0	No AREs or CPEs
C8a	0	7	CPEd
C8g	0	1	CPEd
C9	0	2	CPEd
CAAA01118383.1	1	0	AREd
Caap1	2	11	-2.45943
Cab39	2	10	-2.32193
Cab39l	1	5	-2.32193
Cabcoco1	0	0	No AREs or CPEs
Cabin1	0	2	CPEd
Cables1	0	3	CPEd
Cables2	1	4	-2
Cabp1	0	0	No AREs or CPEs
Cabp4	0	0	No AREs or CPEs
Cabp7	1	2	-1
Cabyr	1	1	0
Cacfd1	0	1	CPEd
Cachd1	4	2	1
Cacna1a	0	1	CPEd
Cacna1b	0	1	CPEd
Cacna1d	3	9	-1.58496
Cacna1e	8	15	-0.906891
Cacna1f	0	0	No AREs or CPEs
Cacna1g	0	4	CPEd
Cacna1h	1	0	AREd
Cacna1i	1	2	-1
Cacna1s	0	1	CPEd
Cacna2d2	1	3	-1.58496
Cacna2d4	0	2	CPEd
Cacnb2	1	7	-2.80735
Cacnb3	0	0	No AREs or CPEs
Cacnb4	22	32	-0.540568
Cacng2	5	6	-0.263034
Cacng3	0	0	No AREs or CPEs
Cacng4	1	1	0
Cacng6	0	1	CPEd
Cacng7	2	1	1
Cacng8	0	0	No AREs or CPEs
Cactin	1	0	AREd
Cacul1	4	23	-2.52356
Cacybp	5	3	0.736966
Cad	0	1	CPEd
Cadm1	0	5	CPEd
Cadm3	0	3	CPEd
Cadm4	0	2	CPEd
Cadps	4	6	-0.584963
Cadps2	1	7	-2.80735
Cage1	0	0	No AREs or CPEs
Calb1	8	13	-0.70044
Calb2	1	0	AREd
Calca	0	0	No AREs or CPEs
Calcb	0	1	CPEd
Calcoco1	2	1	1
Calcoco2	0	2	CPEd
Calcr	5	6	-0.263034
Calcrl	5	22	-2.1375
Cald1	5	5	0
Calhm2	2	2	0
Calm1	10	6	0.736966
Calm2	1	3	-1.58496
Calm3	0	4	CPEd
Calml4	0	1	CPEd
[truncated: 13,937 more rows]
