# Supplementary material for: Macrophage inflammation resolution requires CPEB4-directed offsetting of mRNA degradation
Source: eLife. 2022 Apr 20;11:e75873. doi: 10.7554/eLife.75873 (PMC9094754; doi:10.7554/eLife.75873)
Supplement: Supplementary file 4. — Data were obtained from TTP and HuR PAR-iCLIP experiments in lipopolysaccharide (LPS)-stimulated bone marrow-derived macrophages (BMDMs) (Sedlyarov et al., 2016). Only mRNAs with HuR/TTP binding in the 3′-UTR were considered. For TTP, mRNAs bound after 3 hr or 6 hr of LPS stimulation were considered. For HuR-bound mRNAs, PAR-iCLIP data corresponded to 6 hr of LPS stimulation. [file elife-75873-supp4.xlsx]

## Sheet: TTP target mRNAs
TTP target mRNAs		Definition
9530068E07Rik		Data obtained from Sedlyarov et al, Mol Systems Biol 2016
Abcc1		Includes mRNAs with PAR-iCLIP defined TTP binding sites in the 3'UTR in BMDMs stimulated with LPS for 3h or 6h.
Actb
Aff1
Ahnak
Anxa5
App
Arf4
Arl8a
Asb1
Atf3
Atp6v0b
Atp6v1e1
Atxn2l
B2m
Bcl10
Brd4
Ccdc50
Ccl12
Ccl2
Ccl3
Ccl4
Ccl7
Ccl9
Ccng2
Ccr5
Ccrl2
Cd274
Cd44
Cd69
Cdkn1a
Cebpb
Cep170
Cflar
Cish
Cklf
Clec4e
Cmpk2
Cmtm6
Cox17
Cpd
Cpne3
Csf3
Csrnp1
Cxcl1
Cxcl10
Cxcl2
D1Ertd622e
Dck
Dda1
Degs1
Dennd4b
Dock8
Dusp1
Dusp11
Dusp2
Edn1
Ehd1
Eno2
Errfi1
Ets2
Etv3
Etv6
Evl
Fam49b
Fgl2
Fos
Fth1
Gch1
Gdf15
Gnb2
Golga7
H2-T24
H3f3b
Hif1a
Hmox1
Icam1
Ier3
Ifit2
Il10
Il10ra
Il12b
Il1a
Il1b
Il1rn
Il27
Il6
Irf1
Itgav
Junb
Ldlr
Lgals3
Lipg
Lpl
Maf
Mafk
Map2k7
Mapk1ip1l
Mapk6
March5
Marcks
Mcl1
Mdm2
Mllt11
Mmp13
Mpeg1
Mxd1
Myadm
Myl12a
Myl12b
Nab2
Nfkbia
Nfkbiz
Nlrp3
Nos2
Notch1
Nt5c3
Pcgf3
Pde4b
Peli1
Picalm
Pim1
Pim3
Plaur
Pld2
Plek
Ppp1r15a
Ppp3r1
Prdx1
Ptgs2
Pvr
Rab18
Rab5c
Rabep1
Ralgds
Rasgef1b
Rassf4
Rbm33
Rhob
Rnd1
Rusc2
Sdc4
Sdcbp
Serpine1
Sfmbt1
Sgk3
Slamf7
Slc16a10
Slc4a7
Slfn4
Slfn5
Smpdl3a
Socs1
Socs3
Sp100
Spp1
Spred1
Stat1
Stip1
Stx7
Tbc1d13
Tiparp
Tmed4
Tmem171
Tnf
Tnfaip2
Tnfaip3
Tnfrsf11a
Tnfrsf1b
Tnfsf9
Tns3
Tor1aip1
Tpm4
Trim30a
Txnrd1
Usp12
Usp18
Ywhaz
Zeb2
Zfp36
Zfp36l2

## Sheet: HuR target mRNAs
HuR target mRNAs		Definition
Abcg1		Data obtained from Sedlyarov et al, Mol Systems Biol 2016
Actb		Includes mRNAs with PAR-iCLIP defined HuR binding sites in the 3'UTR in BMDMs stimulated with LPS for 6h.
Actr2
Adam17
Adap2
Ahnak
Alcam
Alyref
Anxa4
Aplp2
Apobec3
Arf3
Arf5
Arf6
Arl8a
Arpc4
B2m
B4galt5
Bbx
BC005537
Brd2
Btg1
C3ar1
C5ar1
Cadm1
Calcrl
Calr
Camk2d
Canx
Cap1
Ccl3
Ccl4
Ccl7
Ccl9
Ccnd2
Cd274
Cd36
Cd44
Cd47
Cd53
Cd81
Cd9
Cdc42
Cdk6
Cdkn1a
Cebpb
Cfl1
Cflar
Cltc
Cmtm6
Coro2a
Cpd
Cpne3
Cxcl10
Cxcl2
Ddhd1
Ddx17
Ddx23
Ddx6
Dpysl2
Dtx3l
Dyrk1a
Eif4a1
Eif5a
Elavl1
Fcgr4
Fhl3
Fth1
Furin
Gas7
Gatad2a
Glipr2
Gm2a
Gnb1
Golph3
Gpbp1l1
Grb2
Gsr
H2-K1
Hmox1
Hnrnpa0
Hnrnpu
Ifit1
Ifit2
Igf1
Il1rn
Irak2
Itgav
Itgb1
Itm2b
Khsrp
Klf13
Klf6
Lars2
Lcp1
Lgmn
Lipg
Litaf
Lnpep
Lpl
Lrrc58
Lsm12
Maf
March1
Marcks
Marcksl1
Mark2
Med13
Med13l
Mitf
Mllt6
Mrfap1
Mxd1
Myadm
Myh9
Myo10
Ncoa7
Nfkb1
Nfkbia
Nlgn2
Notch2
Nrp2
Nucks1
Nufip2
Osbpl8
Otub1
Pafah1b2
Pam
Parp4
Pcbp2
Pdpn
Pfn1
Pim1
Plec
Plekhf2
Pmp22
Poldip3
Ppm1k
Ppp1cb
Ppp1r15b
Ppp4c
Prdx1
Psmd11
Ptges3
Ptgs2
Ptprj
Qk
Rab21
Rab5c
Rab8b
Ranbp1
Rap1b
Rap2b
Rapgef2
Rbms1
Rhbdf2
Rhoa
Rnf111
Rsad2
Rsl24d1
Sap30
Sash1
Sco1
Sdc4
Sema4d
Sept2
Sertad3
Set
Sirpa
Skp1a
Slc39a1
Slc44a1
Slc6a6
Smg7
Soat1
Sod2
Son
Spp1
Srcap
Srrm2
Srsf9
Ssr3
Stat5a
Tapbp
Tcf4
Tet2
Tifa
Tle3
Tnf
Tnfrsf11a
Tnfsf10
Tor1aip1
Tor1aip2
Tpm3
Tram1
Trim30a
Trim30d
Trp53
Txnrd1
Ube2d3
Ugcg
Upf1
Vasp
Wdr1
Wtap
Ythdf2
Ywhae
Ywhag
Ywhaz
Zeb2
Zfp36
Zfp710
Znrf2
