# Supplementary material for: Macrophage inflammation resolution requires CPEB4-directed offsetting of mRNA degradation
Source: eLife. 2022 Apr 20;11:e75873. doi: 10.7554/eLife.75873 (PMC9094754; doi:10.7554/eLife.75873)
Supplement: Supplementary file 5. — Wildtype BMDMs were stimulated with lipopolysaccharide (LPS), and mRNA levels were quantified by RNAseq (n = 4). Wildtype and Cpeb4 KO samples were compared for each time point independently. The expression pattern over time for wildtype samples was analyzed (differential expression results against consecutive time points and Rlog data normalized by maximum). [file elife-75873-supp5.xlsx]

## Sheet: RNAseq BMDMs
		Expression pattern over time for WT samples. Differential expression results against consecutive time points.														Expression pattern over time for WT samples. Differential expression results against Untreated BMDMs.																Rlog data Wild type							Rlog (transformed to original scale) normalized by maximum							RPKM Wild type
entrezgene	genesymbol.ucsc	R.un_1h.log2FoldChange	R.un_1h.pvalue	R.un_1h.padj	R.1h_3h.log2FoldChange	R.1h_3h.pvalue	R.1h_3h.padj	R.3h_6h.log2FoldChange	R.3h_6h.pvalue	R.3h_6h.padj	R.6h_9h.log2FoldChange	R.6h_9h.pvalue	R.6h_9h.padj	entrez	symbol.ucsc	logfc.1	t.1	pval.1	padj.1	logfc.3	t.3	pval.3	padj.3	logfc.6	t.6	pval.6	padj.6	logfc.9	t.9	pval.9	padj.9	Time.0	Time.1	Time.3	Time.6	Time.9	entrez	genesymbol.ucsc	wt_un_25	wt_1h_25	wt_3h_25	wt_6h_25	wt_9h_25	entrezgene	gene_symbol.UCSC	wt_un_25	wt_1h_25	wt_3h_25	wt_6h_25
66050	0610009B22Rik	-0.238419	0.0115704	0.0337849	-0.923437	3.6213e-19	2.51839e-18	0.0361612	0.744312	0.807096	0.545091	2.98358e-07	1.35455e-06	66050	0610009B22Rik	-0.238418	-2.52498	0.0115704	0.033785	-1.16186	-11.4557	2.20265e-30	2.01818e-29	-1.12569	-10.955	6.2903e-28	2.72591e-27	-0.580603	-6.0176	1.77021e-09	5.37466e-09	8.7761	8.61612	8.01673	8.04447	8.38989	66050	0610009B22Rik	1	0.895041	0.590756	0.602223	0.765139	66050	0610009B22Rik	27.3369	19.0607	10.2237	7.40918
100125929	0610009E02Rik	-1.01201	0.0780614	0.164794	2.23108	6.75049e-05	0.000182362	-0.0860147	0.859383	0.8986	-0.785634	0.119249	0.197457	100125929	0610009E02Rik	-1.01201	-1.76204	0.0780617	0.164795	1.21907	2.45677	0.0140192	0.029795	1.13305	2.25648	0.0240409	0.0351601	0.34742	0.675136	0.499589	0.585428	3.2802	2.81181	3.90918	3.8508	3.44638	100125929	0610009E02Rik	0.646632	0.467366	1	0.96034	0.725576	100125929	0610009E02Rik	0.323946	0	0.585501	0.18185
66838	0610009L18Rik	-0.54908	0.00518825	0.0167772	-0.395314	0.0639031	0.104974	0.158631	0.475766	0.571093	-0.432503	0.0543854	0.101582	66838	0610009L18Rik	-0.549079	-2.79511	0.00518828	0.0167773	-0.944394	-4.58919	4.4496e-06	1.39704e-05	-0.785763	-3.80875	0.000139674	0.000253355	-1.21827	-5.84635	5.0248e-09	1.49014e-08	6.41437	6.03827	5.80045	5.90399	5.63839	66838	0610009L18Rik	1	0.77052	0.65342	0.70204	0.583991	66838	0610009L18Rik	7.98727	3.22563	3.28265	2.5268
71675	0610010F05Rik	0.322573	0.000202671	0.000912554	-0.109199	0.213053	0.297965	0.0409222	0.645664	0.724606	-0.134643	0.129799	0.212286	71675	0610010F05Rik	0.322573	3.71567	0.00020267	0.00091255	0.213374	2.43325	0.0149639	0.0316604	0.254296	2.88535	0.00390981	0.00629241	0.119653	1.36638	0.171818	0.233145	9.41785	9.62569	9.55482	9.58164	9.49353	71675	0610010F05Rik	0.865834	1	0.952063	0.969928	0.912468	71675	0610010F05Rik	8.18779	8.52612	5.55699	4.92747
104457	0610010K14Rik	-0.0585847	0.644552	0.776077	-0.596816	4.39172e-06	1.36176e-05	-0.727188	1.0362e-07	3.53264e-07	0.497329	0.000284195	0.000865641	104457	0610010K14Rik	-0.0585845	-0.461341	0.644554	0.776079	-0.655401	-5.06942	3.99028e-07	1.36254e-06	-1.38259	-10.3291	5.20212e-25	2.08461e-24	-0.88526	-6.82768	8.63011e-12	2.96069e-11	9.16811	9.12618	8.72688	8.27797	8.58429	104457	0610010K14Rik	1	0.971355	0.736506	0.539561	0.667197	104457	0610010K14Rik	30.1929	21.6349	15.73	7.10768
106264	0610012G03Rik	-0.29341	0.0599751	0.133765	-0.838041	1.07437e-07	3.85271e-07	-0.205886	0.197596	0.274619	0.860327	5.99557e-08	2.92484e-07	106264	0610012G03Rik	-0.293409	-1.88097	0.0599754	0.133766	-1.13145	-7.193	6.33845e-13	3.05397e-12	-1.33734	-8.45919	2.69236e-17	8.67568e-17	-0.477009	-3.05286	0.00226674	0.00423635	10.4082	10.1973	9.66265	9.53644	10.0817	106264	0610012G03Rik	1	0.863997	0.596449	0.546486	0.797475	106264	0610012G03Rik	42.0737	26.8804	16.5527	10.9948
68364	0610030E20Rik	-0.745098	6.02775e-19	1.00362e-17	0.376742	1.18745e-05	3.51003e-05	1.16865	7.00459e-45	1.27545e-43	-0.341716	2.31686e-05	8.2823e-05	68364	0610030E20Rik	-0.745098	-8.89152	6.0278e-19	1.00363e-17	-0.368356	-4.4242	9.67989e-06	2.95914e-05	0.800294	9.89971	4.17501e-23	1.59812e-22	0.458578	5.67036	1.42497e-08	4.11475e-08	9.84416	9.37291	9.60798	10.3827	10.1494	68364	0610030E20Rik	0.688456	0.496611	0.584492	1	0.850702	68364	0610030E20Rik	10.7567	5.22976	4.85102	9.03028
74098	0610037L13Rik	0.0342606	0.740212	0.84446	0.344266	0.000909496	0.00212876	0.117331	0.257638	0.344806	-0.0574095	0.577788	0.690371	74098	0610037L13Rik	0.0342607	0.331574	0.740211	0.844459	0.378527	3.67567	0.000237226	0.000633305	0.495858	4.80514	1.54642e-06	3.20883e-06	0.438448	4.27887	1.87844e-05	4.36075e-05	9.11227	9.13186	9.35703	9.43431	9.39634	74098	0610037L13Rik	0.799937	0.810871	0.947841	1	0.974025	74098	0610037L13Rik	14.4478	11.5631	13.9892	12.2086
70345	0610038B21Rik	-0.341027	0.517331	0.673164	-0.927973	0.154765	0.227368	1.27559	0.0516627	0.0846449	0.405344	0.444965	0.569946	70345	0610038B21Rik	-0.341026	-0.647463	0.517332	0.673165	-1.269	-2.0293	0.0424281	0.0828116	0.00658954	0.0124157	0.990094	0.992874	0.411933	0.83562	0.403369	0.489771	2.57641	2.41001	2.12456	2.55976	2.71622	70345	0610038B21Rik	0.907639	0.808763	0.663581	0.897224	1	70345	0610038B21Rik	0.186838	0.0936433	0.0904531	0.109253
68386	0610039K10Rik	-0.237641	0.681093	0.802321	0.573642	0.330214	0.429501	0.786962	0.144278	0.209103	-1.1601	0.0362874	0.071336	68386	0610039K10Rik	-0.23764	-0.41097	0.681094	0.802321	0.336002	0.604144	0.545748	0.764787	1.12296	2.13058	0.0331234	0.0474545	-0.0371371	-0.0650546	0.948131	0.958856	2.36748	2.30615	2.48572	2.8959	2.3828	68386	0610039K10Rik	0.693317	0.664458	0.75253	1	0.700716	68386	0610039K10Rik	0.374019	0.112475	0.181073	0.349932
67672	0610040B10Rik	-0.0307199	0.919057	0.955712	-0.686392	0.0481478	0.0817091	-0.877106	0.0485229	0.080101	0.328584	0.477087	0.601052	67672	0610040B10Rik	-0.0307193	-0.10162	0.919058	0.9528	-0.717111	-2.11622	0.0343262	0.0681306	-1.59422	-3.88351	0.000102958	0.000188822	-1.26563	-3.49817	0.000468461	0.000951851	3.90515	3.87087	3.48916	3.11083	3.23641	67672	0610040B10Rik	1	0.976522	0.749507	0.576615	0.629055	67672	0610040B10Rik	1.77846	0.9724	0.782727	0.302532
76261	0610040J01Rik	-0.558906	0.159789	0.289279	-0.184876	0.677364	0.753662	-1.79173	0.00503984	0.0100438	-1.74884	0.0860964	0.15002	76261	0610040J01Rik	-0.558905	-1.40578	0.15979	0.289279	-0.743781	-1.78048	0.0749966	0.138932	-2.53551	-4.17482	2.98215e-05	5.69536e-05	-4.28435	-4.77541	1.79338e-06	4.51295e-06	3.2383	2.9077	2.7973	2.12611	1.80204	76261	0610040J01Rik	1	0.795207	0.736626	0.462591	0.369525	76261	0610040J01Rik	0.361399	0.1716	0.147337	0.017796
68400	0610043K17Rik	-2.30716	0.0427144	0.1019	2.86676	0.0117592	0.0228573	1.89406	0.00283492	0.00587031	-1.05035	0.063198	0.115328	68400	0610043K17Rik	-2.30716	-2.02649	0.0427144	0.1019	0.559605	0.776013	0.437741	0.645137	2.45366	3.86122	0.00011282	0.000206462	1.40332	2.12138	0.0338896	0.0534818	1.64723	1.30746	1.8455	2.75627	2.20436	68400	0610043K17Rik	0.463604	0.366323	0.531901	1	0.682117	68400	0610043K17Rik	0.115111	0	0.222913	0.592336
100043040	1110002L01Rik	-1.02862	0.00380651	0.0128319	-0.61761	0.167603	0.243034	1.42815	0.000975514	0.00217929	0.519155	0.126143	0.207299	100043040	1110002L01Rik	-1.02862	-2.89377	0.00380652	0.0128319	-1.64623	-4.01363	5.97927e-05	0.000170128	-0.218083	-0.647058	0.517594	0.577528	0.301071	0.972163	0.33097	0.413743	3.99804	3.43121	3.19819	3.8774	4.17325	100043040	1110002L01Rik	0.885634	0.597894	0.508717	0.81459	1	100043040	1110002L01Rik	0.269464	0.151262	0.0730546	0.131097
56372	1110004F10Rik	0.15172	0.176717	0.312437	-0.0067667	0.952084	0.96487	0.0701274	0.534519	0.624706	-0.0635268	0.573299	0.686614	56372	1110004F10Rik	0.15172	1.35093	0.176717	0.312436	0.144953	1.28856	0.197551	0.329258	0.215081	1.91009	0.056122	0.0775289	0.151554	1.34854	0.177486	0.239984	10.8916	10.9858	10.9854	11.0301	10.9863	56372	1110004F10Rik	0.908438	0.969729	0.969446	1	0.970095	56372	1110004F10Rik	54.4209	45.0777	44.4276	38.8883
66123	1110006O24Rik	-1.15365	1.83095e-06	1.12681e-05	-0.0352362	0.899949	0.927303	0.176959	0.53992	0.62977	0.25155	0.355111	0.478626	66123	1110006O24Rik	-1.15365	-4.77124	1.83096e-06	1.12682e-05	-1.18888	-4.72972	2.24826e-06	7.24805e-06	-1.01193	-4.02237	5.76151e-05	0.00010758	-0.760376	-3.27649	0.00105108	0.00205322	5.17128	4.47376	4.43525	4.55207	4.70445	66123	1110006O24Rik	1	0.616631	0.600391	0.65103	0.723553	66123	1110006O24Rik	2.9641	1.11421	0.807188	0.779965
66132	1110008L16Rik	0.0892059	0.42279	0.588273	-0.753998	8.10139e-10	3.3837e-09	0.301709	0.0207409	0.0369438	0.448563	0.000232677	0.000719012	66132	1110008L16Rik	0.089206	0.801592	0.422789	0.588274	-0.664792	-5.48206	4.20399e-08	1.53368e-07	-0.363083	-3.03213	0.00242836	0.00398235	0.0854799	0.763314	0.445276	0.531668	7.50693	7.56571	7.08314	7.27442	7.56084	66132	1110008L16Rik	0.960078	1	0.715704	0.817174	0.996633	66132	1110008L16Rik	2.68167	2.48222	1.08281	1.24915
73737	1110008P14Rik	0.114039	0.451477	0.616319	-0.0133477	0.930057	0.949227	-0.0648181	0.671553	0.747037	0.216304	0.155983	0.247121	73737	1110008P14Rik	0.114039	0.752958	0.451475	0.616318	0.100692	0.663285	0.507148	0.724139	0.0358737	0.235614	0.813732	0.844468	0.252178	1.6656	0.0957937	0.138095	9.6033	9.66615	9.66311	9.6249	9.76216	73737	1110008P14Rik	0.895731	0.93562	0.933647	0.909248	1	73737	1110008P14Rik	46.776	36.2516	42.303	30.594
68618	1110012L19Rik	-0.116783	0.317841	0.483307	-0.555297	8.01911e-06	2.41589e-05	0.0620912	0.634602	0.715517	0.710671	1.26705e-08	6.64452e-08	68618	1110012L19Rik	-0.116783	-0.998904	0.317841	0.483309	-0.67208	-5.49017	4.01549e-08	1.46653e-07	-0.609989	-4.93657	7.95066e-07	1.67727e-06	0.100682	0.866053	0.386461	0.472625	8.06422	7.98486	7.634	7.67431	8.13132	68618	1110012L19Rik	0.954556	0.903469	0.70842	0.728497	1	68618	1110012L19Rik	11.1385	8.19687	5.57166	4.56517
73721	1110017D15Rik	1.16543	0.00396315	0.0132927	-1.0578	0.0139646	0.026688	0.346803	0.464156	0.559855	0.200826	0.647962	0.750875	73721	1110017D15Rik	1.16543	2.88108	0.00396312	0.0132926	0.107632	0.233837	0.815112	0.974041	0.454435	1.0087	0.313121	0.37232	0.655261	1.54063	0.123407	0.173268	2.90355	3.48136	2.93892	3.11456	3.22275	73721	1110017D15Rik	0.669976	1	0.686606	0.7755	0.835891	73721	1110017D15Rik	0.330877	0.469868	0.320372	0.232176
76311	1110019D14Rik	0.148137	0.331945	0.498462	-0.684717	5.19681e-05	0.00014228	-0.129533	0.493503	0.587044	-0.44386	0.0251603	0.0515592	76311	1110019D14Rik	0.148137	0.970205	0.331944	0.49846	-0.53658	-3.20577	0.00134701	0.00329953	-0.666114	-3.81626	0.00013549	0.000246044	-1.10997	-6.24978	4.11042e-10	1.29064e-09	6.18598	6.28401	5.84511	5.76329	5.4989	76311	1110019D14Rik	0.934309	1	0.737697	0.697023	0.580308	76311	1110019D14Rik	3.25299	2.66577	1.17252	1.11077
68531	1110020A21Rik	-0.534906	0.151258	0.277248	-0.851656	0.0646287	0.106021	-1.41525	0.03766	0.0638005	0.668359	0.35157	0.474564	68531	1110020A21Rik	-0.534905	-1.4351	0.151258	0.277249	-1.38656	-3.1709	0.00151967	0.00369781	-2.80181	-4.4842	7.31879e-06	1.45552e-05	-2.13345	-4.33075	1.48603e-05	3.47973e-05	3.3166	3.00658	2.59764	2.14677	2.30499	68531	1110020A21Rik	1	0.806626	0.607535	0.444474	0.49599	68531	1110020A21Rik	0.583102	0.263026	0.141148	0.054555
68721	1110032A03Rik	-0.304116	0.00113705	0.00438612	-0.523295	4.82121e-07	1.63625e-06	-0.542071	6.16993e-06	1.79906e-05	0.0909363	0.460647	0.584918	68721	1110032A03Rik	-0.304116	-3.25422	0.00113705	0.00438613	-0.827411	-8.23345	1.81902e-16	1.01834e-15	-1.36948	-12.3456	5.14646e-35	2.60041e-34	-1.27855	-12.2374	1.96135e-34	1.37003e-33	7.96366	7.75643	7.41405	7.07852	7.12749	68721	1110032A03Rik	1	0.866197	0.683206	0.541435	0.560129	68721	1110032A03Rik	7.00606	4.46184	3.07293	1.64338
68725	1110032F04Rik	5.86805	4.50538e-08	3.39968e-07	4.02454	1.35176e-32	1.50905e-31	-0.594916	0.0166072	0.0301628	-2.40164	7.81235e-16	7.43751e-15	68725	1110032F04Rik	5.86804	5.46981	4.50519e-08	3.39953e-07	9.89258	9.45443	3.24791e-21	2.20068e-20	9.29767	8.87316	7.11006e-19	2.41505e-18	6.89602	6.51024	7.50332e-11	2.45143e-10	2.73566	3.71934	6.21962	5.7958	4.2118	68725	1110032F04Rik	0.0893769	0.176743	1	0.74545	0.24865	68725	1110032F04Rik	0	0.165964	1.6031	0.877789
68763	1110038B12Rik	0.209407	0.0645354	0.141769	-0.462605	5.33575e-05	0.000145931	-0.644945	4.2781e-08	1.50761e-07	-0.00354406	0.976216	0.98626	68763	1110038B12Rik	0.209408	1.84846	0.0645352	0.141768	-0.253197	-2.21403	0.0268266	0.0544377	-0.898142	-7.70676	1.29051e-14	3.7955e-14	-0.901686	-7.80287	6.05146e-15	2.39237e-14	9.90629	10.0469	9.73492	9.32545	9.32063	68763	1110038B12Rik	0.907142	1	0.805542	0.606491	0.60447	68763	1110038B12Rik	74.3939	72.095	50.4926	24.0282
117171	1110038F14Rik	-0.212939	0.207812	0.353343	1.57239	9.57347e-21	7.14868e-20	0.0424959	0.7991	0.850927	-1.06947	1.84476e-10	1.15104e-09	117171	1110038F14Rik	-0.212939	-1.2596	0.207813	0.353345	1.35945	8.11197	4.98068e-16	2.73737e-15	1.40195	8.36036	6.25274e-17	1.98814e-16	0.332473	1.97422	0.0483564	0.0740035	9.6369	9.50136	10.5205	10.5611	9.83715	117171	1110038F14Rik	0.526967	0.479714	0.972228	1	0.605435	117171	1110038F14Rik	26.5141	16.7499	61.6262	40.2268
68808	1110046J04Rik	0.164315	0.457604	0.622133	-1.10965	5.43747e-06	1.66953e-05	-0.179987	0.508672	0.601214	0.348902	0.190558	0.291605	68808	1110046J04Rik	0.164315	0.742801	0.457602	0.622131	-0.945337	-3.89619	9.7718e-05	0.000272108	-1.12532	-4.4625	8.101e-06	1.60631e-05	-0.776421	-3.28771	0.00101006	0.00197779	5.85276	5.93901	5.25333	5.15831	5.36428	68808	1110046J04Rik	0.941968	1	0.621713	0.582084	0.671414	68808	1110046J04Rik	3.75377	2.52382	1.19676	0.642443
228356	1110051M20Rik	-0.051727	0.619312	0.755913	-0.483273	2.23897e-05	6.39543e-05	-0.783228	8.22481e-09	3.0877e-08	0.529458	0.000112858	0.000364641	228356	1110051M20Rik	-0.0517269	-0.496825	0.619312	0.755915	-0.534999	-4.80045	1.58313e-06	5.16246e-06	-1.31823	-10.3211	5.65949e-25	2.26676e-24	-0.78877	-6.9823	2.90392e-12	1.02334e-11	7.46771	7.42844	7.11411	6.63121	6.95275	228356	1110051M20Rik	1	0.973146	0.782628	0.560001	0.699811	228356	1110051M20Rik	4.72699	3.65735	1.96651	0.941686
66206	1110059E24Rik	-0.0182702	0.860962	0.919232	0.495696	2.10795e-06	6.73584e-06	-0.191712	0.0676422	0.107483	-0.144992	0.169526	0.264736	66206	1110059E24Rik	-0.0182701	-0.175148	0.860963	0.916614	0.477426	4.61574	3.91695e-06	1.23783e-05	0.285713	2.72865	0.0063594	0.0099985	0.140721	1.35205	0.176359	0.238583	8.90843	8.89522	9.21625	9.09132	8.99879	66206	1110059E24Rik	0.807861	0.800493	1	0.917043	0.860073	66206	1110059E24Rik	14.1729	10.0872	14.8324	9.95093
66202	1110059G10Rik	-0.0572052	0.457234	0.621796	-0.13603	0.0880027	0.139694	0.0936305	0.251584	0.337712	-0.403557	1.00255e-06	4.27017e-06	66202	1110059G10Rik	-0.0572051	-0.743408	0.457235	0.621797	-0.193236	-2.4618	0.013824	0.0294148	-0.099605	-1.26163	0.207082	0.256844	-0.503162	-6.33921	2.30945e-10	7.36393e-10	9.1582	9.11844	9.02988	9.09276	8.83239	66202	1110059G10Rik	1	0.972815	0.914891	0.95565	0.797846	66202	1110059G10Rik	8.07477	5.65425	5.0415	4.25759
68920	1110065P20Rik	-0.0484893	0.768665	0.863226	-0.154495	0.36455	0.464138	-0.0237724	0.89225	0.923066	0.23441	0.174685	0.27119	68920	1110065P20Rik	-0.048489	-0.29412	0.768666	0.863228	-0.202984	-1.20804	0.22703	0.371906	-0.226756	-1.33276	0.182612	0.22936	0.00765413	0.0463576	0.963025	0.970934	7.11463	7.0834	6.97781	6.97118	7.11857	68920	1110065P20Rik	0.997271	0.975917	0.907039	0.902885	1	68920	1110065P20Rik	7.09517	5.89566	6.32756	4.32359
68861	1190002N15Rik	-0.158526	0.323896	0.489342	-1.17909	6.91865e-13	3.51554e-12	-0.223392	0.185233	0.259591	0.262944	0.117736	0.195266	68861	1190002N15Rik	-0.158526	-0.986481	0.323897	0.489344	-1.33762	-8.17206	3.03176e-16	1.68068e-15	-1.56101	-9.44822	3.44639e-21	1.25325e-20	-1.29807	-7.95721	1.75955e-15	7.1117e-15	9.55815	9.4422	8.67053	8.53817	8.6821	68861	1190002N15Rik	1	0.922773	0.540505	0.493122	0.544857	68861	1190002N15Rik	12.8049	8.59323	2.51107	2.08096
68918	1190005I06Rik	-0.515371	0.0564908	0.127366	-0.815053	0.0130285	0.0250575	-2.12307	0.000166458	0.000412231	2.22195	6.66696e-05	0.00022332	68918	1190005I06Rik	-0.515371	-1.90723	0.056491	0.127367	-1.33042	-4.2608	2.03693e-05	6.05255e-05	-3.45349	-6.48785	8.70682e-11	2.21994e-10	-1.23154	-4.10249	4.08724e-05	9.20147e-05	4.43178	4.09847	3.63506	2.85078	3.69146	68918	1190005I06Rik	1	0.793714	0.575658	0.334251	0.598605	68918	1190005I06Rik	2.08376	1.11724	0.609973	0.136016
544717	1190007I07Rik	-0.22005	0.203222	0.347041	-0.888304	3.14974e-06	9.89755e-06	-0.607493	0.00566753	0.0111938	0.467765	0.033184	0.0658266	544717	1190007I07Rik	-0.22005	-1.27242	0.203223	0.347042	-1.10835	-5.9277	3.07201e-09	1.20871e-08	-1.71585	-8.39074	4.83074e-17	1.54363e-16	-1.24808	-6.67256	2.51383e-11	8.441e-11	6.72816	6.56292	6.00408	5.65214	5.92404	544717	1190007I07Rik	1	0.891779	0.605382	0.474335	0.572708	544717	1190007I07Rik	7.60839	4.05167	2.80861	1.46817
100043489	1300002E11Rik	-0.259033	0.154558	0.281858	-0.579213	0.00528505	0.0109612	-0.47274	0.0523763	0.0856977	1.03543	7.06413e-06	2.70927e-05	100043489	1300002E11Rik	-0.259033	-1.42361	0.154559	0.281858	-0.838245	-4.1894	2.79689e-05	8.18809e-05	-1.31098	-5.90029	3.62866e-09	8.58709e-09	-0.275554	-1.49884	0.133916	0.186436	5.76135	5.59582	5.23624	4.96924	5.57763	100043489	1300002E11Rik	1	0.891598	0.694906	0.577497	0.880427	100043489	1300002E11Rik	0.664677	0.441182	0.226121	0.134459
319830	1500004A13Rik	-1.71268	1.92227e-07	1.34086e-06	0.421857	0.240161	0.329796	0.801454	0.0179728	0.0324441	0.502114	0.105901	0.178341	319830	1500004A13Rik	-1.71268	-5.2067	1.92229e-07	1.34088e-06	-1.29082	-4.00319	6.2495e-05	0.000177258	-0.48937	-1.59698	0.110271	0.144519	0.0127443	0.0435385	0.965272	0.972842	5.30566	4.28054	4.52011	4.99706	5.30429	319830	1500004A13Rik	1	0.491367	0.580129	0.807421	0.999048	319830	1500004A13Rik	0.754707	0.275098	0.104392	0.247594
66236	1500011B03Rik	-0.808328	9.23994e-11	9.00939e-10	-0.117155	0.3671	0.466634	0.819518	1.96482e-10	8.31933e-10	0.498359	5.56622e-05	0.000188636	66236	1500011B03Rik	-0.808328	-6.47889	9.24004e-11	9.00948e-10	-0.925482	-7.31711	2.53363e-13	1.24062e-12	-0.105964	-0.85734	0.391257	0.454089	0.392395	3.23601	0.00121214	0.00235	8.94228	8.4154	8.34508	8.87071	9.20407	66236	1500011B03Rik	0.834054	0.57888	0.551339	0.793688	1	66236	1500011B03Rik	13.8472	5.65882	5.62447	7.23363
68982	1500015A07Rik	-0.85467	1.67142e-08	1.31499e-07	0.335071	0.038821	0.0674042	0.308047	0.0526221	0.0860551	-0.117449	0.447969	0.572882	68982	1500015A07Rik	-0.85467	-5.64297	1.67143e-08	1.31499e-07	-0.519598	-3.4695	0.000521429	0.00134411	-0.211552	-1.42936	0.1529	0.195106	-0.329001	-2.26365	0.0235954	0.0381919	6.8411	6.29768	6.48841	6.70281	6.62667	68982	1500015A07Rik	1	0.686141	0.783123	0.908597	0.861886	68982	1500015A07Rik	3.52831	1.56766	1.62505	1.74868
69770	1600002K03Rik	0.234177	0.181589	0.318805	-0.57864	0.00115996	0.00267865	-0.30786	0.0927742	0.142275	0.187104	0.306877	0.426913	69770	1600002K03Rik	0.234178	1.33588	0.181588	0.318804	-0.344462	-1.93611	0.0528544	0.101397	-0.652322	-3.6159	0.0002993	0.00052905	-0.465219	-2.61533	0.00891403	0.0154041	8.28626	8.43761	8.05193	7.86884	7.98212	69770	1600002K03Rik	0.900403	1	0.765414	0.674192	0.729259	69770	1600002K03Rik	18.7408	17.8547	15.4477	7.20779
69781	1600010M07Rik	-0.397054	0.0562194	0.12696	-1.58449	7.09324e-12	3.39334e-11	-1.75934	1.63292e-08	5.98002e-08	1.63304	1.56856e-07	7.34102e-07	69781	1600010M07Rik	-0.397054	-1.90933	0.0562197	0.12696	-1.98155	-8.68687	3.72546e-18	2.24455e-17	-3.74088	-12.6891	6.7933e-37	3.57059e-36	-2.10784	-9.24841	2.27856e-20	1.09565e-19	7.0022	6.70647	5.69124	4.80088	5.60079	69781	1600010M07Rik	1	0.81466	0.403053	0.21744	0.378559	69781	1600010M07Rik	12.4723	6.82995	2.06864	0.594259
67912	1600012H06Rik	-0.343501	2.63414e-13	3.11341e-12	0.563217	5.49243e-32	6.0244e-31	0.402622	2.4856e-18	1.67083e-17	-0.0457476	0.307341	0.427463	67912	1600012H06Rik	-0.343501	-7.31189	2.63415e-13	3.11342e-12	0.219715	4.7946	1.62997e-06	5.31085e-06	0.622337	13.7675	3.99909e-43	2.36662e-42	0.57659	12.9486	2.39396e-38	1.82402e-37	10.3056	10.089	10.4485	10.7164	10.6858	67912	1600012H06Rik	0.752193	0.647333	0.830513	1	0.979013	67912	1600012H06Rik	20.611	13.4417	16.3702	18.1003
72244	1600014C10Rik	-0.419169	9.1869e-05	0.000441006	1.47175	1.12166e-43	1.68797e-42	2.52185	8.05863e-138	1.38998e-135	-0.282382	0.00429603	0.0105105	72244	1600014C10Rik	-0.419169	-3.91112	9.18693e-05	0.000441007	1.05258	10.1302	4.05941e-24	3.04817e-23	3.57443	35.0609	2.66178e-269	1.22587e-267	3.29205	32.2954	8.10532e-229	5.44214e-227	9.72084	9.49887	10.3353	12.0763	11.8688	72244	1600014C10Rik	0.195406	0.167541	0.299154	1	0.866063	72244	1600014C10Rik	7.19829	3.66457	10.7687	44.4163
72012	1600020E01Rik	0.135719	0.403884	0.570939	-0.434043	0.0104439	0.0205042	0.0205632	0.907388	0.933681	-0.380357	0.0337693	0.0669182	72012	1600020E01Rik	0.13572	0.834706	0.403883	0.570938	-0.298323	-1.77246	0.0763183	0.14113	-0.27776	-1.63239	0.102597	0.135223	-0.658117	-3.85196	0.000117177	0.00025326	6.9861	7.07625	6.7868	6.8106	6.57531	72012	1600020E01Rik	0.939426	1	0.818211	0.831825	0.706644	72012	1600020E01Rik	8.56586	8.37702	6.32159	5.08218
75462	1700001C19Rik	-0.100402	0.864565	0.921411	-3.13637	0.00178581	0.00400716	-1.76455	0.20977	0.289531	1.67625	0.230684	0.340688	75462	1700001C19Rik	-0.100401	-0.170564	0.864567	0.918726	-3.23677	-3.25246	0.00114412	0.00282522	-5.00132	-4.35998	1.30074e-05	2.54774e-05	-3.32507	-3.38136	0.000721282	0.00143576	1.99321	1.90771	0.972613	0.81411	0.956421	75462	1700001C19Rik	1	0.94246	0.492912	0.441627	0.487411	75462	1700001C19Rik	0.256746	0.197972	0.0382454	0
69303	1700001G11Rik	0.224999	0.743259	0.846283	0.124773	0.858756	0.896868	-0.789099	0.326479	0.419793	0.611579	0.44811	0.573015	69303	1700001G11Rik	0.225	0.327542	0.743258	0.846284	0.349773	0.503794	0.614406	0.83626	-0.439326	-0.554787	0.579041	0.636327	0.172254	0.247183	0.804767	0.852606	1.56101	1.62937	1.67318	1.45045	1.59158	69303	1700001G11Rik	0.925201	0.970094	1	0.856945	0.945012	69303	1700001G11Rik	0.0922678	0.0924894	0.178677	0.0431628
69282	1700001J03Rik	0.624367	0.213027	0.359656	-1.14596	0.0531439	0.0892327	1.64795	0.00510678	0.0101643	-0.0611897	0.894576	0.930602	69282	1700001J03Rik	0.624368	1.24529	0.213027	0.359654	-0.521588	-0.85941	0.390115	0.587377	1.12637	2.26824	0.0233148	0.0341697	1.06518	2.19611	0.0280838	0.0449307	2.35448	2.62078	2.156	2.85802	2.83098	69282	1700001J03Rik	0.705373	0.848363	0.614709	1	0.981428	69282	1700001J03Rik	0.320032	0.366629	0.0442674	0.342196
66323	1700001K19Rik	-0.00312276	0.993052	0.999446	0.0784814	0.832405	0.876522	-0.731074	0.0752212	0.118085	-0.581311	0.203402	0.307057	66323	1700001K19Rik	-0.003122	-0.00870606	0.993054	0.996502	0.0753593	0.207676	0.835482	0.974041	-0.655715	-1.63964	0.10108	0.133388	-1.23703	-2.98479	0.00283772	0.00524676	3.89312	3.86863	3.93556	3.51572	3.25478	66323	1700001K19Rik	0.971012	0.954666	1	0.747508	0.623828	66323	1700001K19Rik	1.26767	0.448487	0.830315	0.383715
69291	1700001L05Rik	-0.0278865	0.902101	0.945946	-0.667822	0.006305	0.0128775	-0.030532	0.907299	0.93365	0.219888	0.39127	0.516819	69291	1700001L05Rik	-0.027886	-0.123006	0.902102	0.943043	-0.695708	-2.88715	0.00388754	0.00897117	-0.72624	-2.95578	0.00311877	0.00506651	-0.506352	-2.1573	0.0309821	0.0492231	5.81888	5.79668	5.37058	5.3795	5.50027	69291	1700001L05Rik	1	0.984732	0.732906	0.737449	0.801844	69291	1700001L05Rik	0.545122	0.463279	0.137691	0.166309
75480	1700003F12Rik	-0.493799	0.0914615	0.186007	-0.33231	0.307151	0.404959	-1.07197	0.00759358	0.0146478	0.456876	0.272913	0.389716	75480	1700003F12Rik	-0.493799	-1.68774	0.0914618	0.186008	-0.826108	-2.66386	0.00772498	0.0170914	-1.89808	-5.05287	4.35211e-07	9.32313e-07	-1.4412	-4.3693	1.24647e-05	2.93718e-05	4.55172	4.21897	4.03634	3.53891	3.72463	75480	1700003F12Rik	1	0.794026	0.69961	0.49558	0.563669	75480	1700003F12Rik	1.69377	1.21274	0.702857	0.226385
100502742	1700007L15Rik	-0.180188	0.475143	0.637827	-0.394864	0.162616	0.237236	-0.128902	0.679748	0.754069	0.0359912	0.907712	0.939239	100502742	1700007L15Rik	-0.180188	-0.714134	0.475144	0.637829	-0.575052	-2.11159	0.034722	0.0688129	-0.703954	-2.46933	0.0135367	0.0204718	-0.667963	-2.47032	0.0134994	0.0227141	4.60283	4.5055	4.2751	4.21131	4.23788	100502742	1700007L15Rik	1	0.934758	0.796785	0.762323	0.776492	100502742	1700007L15Rik	1.33325	1.19326	0.82988	0.400946
629159	1700008J07Rik	0.306817	0.0944605	0.190865	-1.204	1.2939e-08	4.99241e-08	-0.073544	0.762729	0.821506	0.0671848	0.77987	0.853838	629159	1700008J07Rik	0.306818	1.67233	0.0944601	0.190864	-0.897183	-4.24142	2.22114e-05	6.57824e-05	-0.970727	-4.42222	9.76934e-06	1.9276e-05	-0.903542	-4.34714	1.37927e-05	3.23897e-05	5.71439	5.91448	5.15987	5.11459	5.16133	629159	1700008J07Rik	0.870496	1	0.592708	0.574395	0.593309	629159	1700008J07Rik	1.33092	1.40742	0.382352	0.246305
69349	1700008O03Rik	0.0933037	0.843595	0.909593	-1.74692	0.00429588	0.00905196	-0.663109	0.418474	0.515674	1.12101	0.150036	0.239426	69349	1700008O03Rik	0.0933047	0.197299	0.843593	0.907803	-1.65362	-2.72967	0.0063398	0.0142041	-2.31673	-3.2092	0.00133103	0.00223806	-1.19572	-2.17623	0.0295383	0.0470975	2.74115	2.77373	2.00868	1.88082	2.15042	69349	1700008O03Rik	0.977671	1	0.588433	0.538525	0.649179	69349	1700008O03Rik	0.545421	0.468627	0.188609	0.0364496
66931	1700010I14Rik	-0.920536	3.17048e-09	2.68317e-08	-0.929511	3.88263e-06	1.21084e-05	0.958475	4.08967e-06	1.21139e-05	0.407738	0.0189808	0.0401419	66931	1700010I14Rik	-0.920536	-5.92252	3.17049e-09	2.68318e-08	-1.85005	-9.84921	6.9084e-23	4.96215e-22	-0.891572	-5.43436	5.49941e-08	1.23194e-07	-0.483834	-3.24645	0.00116854	0.00227056	6.36674	5.76929	5.24055	5.78831	6.04782	66931	1700010I14Rik	1	0.660922	0.458124	0.669696	0.80167	66931	1700010I14Rik	2.76523	0.968258	0.531821	0.88601
100503727	1700011B04Rik	1.04572	0.490229	0.650328	1.89935	0.155486	0.228277	1.86546	0.0507704	0.0833919	2.01297	0.00181707	0.00478822	100503727	1700011B04Rik	1.04571	0.689939	0.490233	0.650332	2.94506	2.20246	0.0276325	0.0559245	4.81052	4.03048	5.56619e-05	0.00010409	6.82349	6.00735	1.88586e-09	5.7184e-09	0.656587	0.775605	1.01626	1.53877	2.64504	100503727	1700011B04Rik	0.25201	0.273681	0.323363	0.464496	1	100503727	1700011B04Rik	0	0	0	0.154067
69325	1700012B09Rik	3.01588	0.0184714	0.0504995	2.66154	0.00126343	0.00289797	-1.42595	0.058726	0.0949665	0.304669	0.697898	0.791589	69325	1700012B09Rik	3.01587	2.35603	0.0184713	0.0504993	5.67741	4.7556	1.97856e-06	6.40458e-06	4.25147	3.44154	0.000578405	0.000999646	4.55614	3.75391	0.000174099	0.000369779	1.1145	1.53383	2.6266	1.90697	2.068	69325	1700012B09Rik	0.350601	0.468862	1	0.607254	0.678961	69325	1700012B09Rik	0	0.0518237	0.450523	0.19348
72243	1700012D01Rik	0.180719	0.551685	0.700084	-1.39932	0.000448349	0.00109683	1.63167	5.30444e-05	0.000139649	-0.422001	0.194001	0.295721	72243	1700012D01Rik	0.180719	0.595238	0.551684	0.700083	-1.2186	-3.08481	0.00203683	0.00488671	0.41307	1.33174	0.182946	0.229693	-0.00893056	-0.0284293	0.97732	0.981976	3.7499	3.84862	3.18515	3.97946	3.7428	72243	1700012D01Rik	0.852895	0.913296	0.57662	1	0.848706	72243	1700012D01Rik	0.972396	1.02603	0.24777	0.670359
75479	1700012D14Rik	-0.516939	0.401488	0.568653	0.587036	0.357409	0.456564	0.534275	0.372338	0.468399	-0.736643	0.221497	0.329215	75479	1700012D14Rik	-0.516938	-0.838966	0.401489	0.568655	0.0700984	0.118117	0.905975	0.974041	0.604374	1.04978	0.29382	0.351958	-0.132269	-0.221485	0.824715	0.868593	2.44355	2.23145	2.46412	2.65039	2.3349	75479	1700012D14Rik	0.866437	0.747975	0.878879	1	0.803581	75479	1700012D14Rik	0.50894	0.226739	0.438029	0.264535
71867	1700016G22Rik	2.98788	0.00391079	0.0131429	-1.39135	0.106405	0.16492	0.975488	0.283435	0.373566	-2.71146	0.0204608	0.0428871	71867	1700016G22Rik	2.98788	2.88527	0.00391073	0.0131427	1.59653	1.40061	0.16133	0.276133	2.57201	2.39096	0.0168043	0.0251158	-0.139443	-0.102779	0.918139	0.937021	0.537014	1.26996	0.810111	1.0903	0.542347	71867	1700016G22Rik	0.601673	1	0.727061	0.88291	0.603901	71867	1700016G22Rik	0	0.30063	0.0580776	0.168357
74211	1700017B05Rik	-0.198279	0.0723215	0.155331	-3.23231	1.06345e-143	7.45177e-142	3.11184	5.54737e-132	8.37226e-130	0.85496	1.32878e-14	1.16244e-13	74211	1700017B05Rik	-0.198279	-1.79709	0.0723218	0.155332	-3.43059	-27.187	9.24799e-163	4.92053e-161	-0.318749	-2.86937	0.00411287	0.00660797	0.536211	4.88726	1.0225e-06	2.61587e-06	10.3331	10.195	8.35555	10.1152	10.7043	74211	1700017B05Rik	0.773164	0.70259	0.196321	0.664763	1	74211	1700017B05Rik	14.0936	9.82057	0.732915	6.77846
67329	1700018L02Rik	-1.06612	0.0550185	0.125069	0.0194972	0.975075	0.981887	0.103268	0.872234	0.908889	-0.863695	0.211215	0.316365	67329	1700018L02Rik	-1.06612	-1.91873	0.0550187	0.12507	-1.04662	-1.83677	0.0662436	0.124283	-0.943354	-1.63801	0.101419	0.133791	-1.80705	-2.89475	0.00379459	0.0069065	2.76121	2.21718	2.24221	2.26122	1.98834	67329	1700018L02Rik	1	0.685852	0.697856	0.707113	0.585252	67329	1700018L02Rik	0.313762	0.0285924	0.0276183	0.106747
75555	1700020D05Rik	-2.43109	7.04292e-06	4.00607e-05	1.19832	0.0416423	0.0717552	1.88259	6.48269e-05	0.000169108	-0.252032	0.539695	0.656824	75555	1700020D05Rik	-2.43109	-4.49239	7.04297e-06	4.0061e-05	-1.23277	-2.62331	0.00870809	0.0191047	0.649825	1.58178	0.113699	0.148722	0.397794	0.971585	0.331257	0.41404	3.89761	2.86223	3.30976	4.31158	4.16324	75555	1700020D05Rik	0.750552	0.366185	0.499368	1	0.902284	75555	1700020D05Rik	1.07997	0.0698427	0.236122	0.912633
66602	1700020I14Rik	-0.0198179	0.770491	0.864516	0.115307	0.102091	0.159144	0.560396	4.77018e-16	2.82752e-15	-0.203524	0.00209858	0.0054782	66602	1700020I14Rik	-0.0198178	-0.291732	0.770491	0.864517	0.0954896	1.39105	0.164209	0.280504	0.655886	9.88095	5.03545e-23	1.92381e-22	0.452362	6.87864	6.04272e-12	2.09489e-11	8.71194	8.70074	8.77267	9.13974	9.00516	66602	1700020I14Rik	0.743393	0.737645	0.775353	1	0.910936	66602	1700020I14Rik	12.6591	9.70102	8.59335	10.7925
66330	1700020L24Rik	0.936799	0.00392605	0.0131855	0.775699	0.00607216	0.012444	0.22408	0.396264	0.493337	-0.772873	0.0052166	0.0125483	66330	1700020L24Rik	0.9368	2.88405	0.00392603	0.0131855	1.7125	5.52939	3.21339e-08	1.17923e-07	1.93658	6.2708	3.5919e-10	8.89975e-10	1.16371	3.63084	0.000282495	0.000586082	3.63024	4.09674	4.54223	4.68531	4.2148	66330	1700020L24Rik	0.481273	0.665001	0.905581	1	0.721708	66330	1700020L24Rik	0.420259	0.536161	1.03579	0.786388
67851	1700021F05Rik	-0.0526163	0.681653	0.802579	-0.196489	0.133484	0.200417	0.307545	0.0198524	0.0355163	0.338403	0.00894045	0.0203582	67851	1700021F05Rik	-0.0526161	-0.410207	0.681654	0.802581	-0.249105	-1.91803	0.0551076	0.105282	0.0584397	0.451672	0.651505	0.703125	0.396842	3.11908	0.00181415	0.00343653	8.68962	8.6507	8.52876	8.72888	8.95212	67851	1700021F05Rik	0.833644	0.811458	0.745688	0.856644	1	67851	1700021F05Rik	19.369	15.4848	13.0013	13.3411
69431	1700022N22Rik	-0.00327193	0.994792	1	-1.10421	0.0599448	0.0991772	-0.198331	0.771936	0.828579	-0.067873	0.922039	0.949712	69431	1700022N22Rik	-0.00327073	-0.00652539	0.994794	0.997333	-1.10748	-1.91786	0.0551286	0.105294	-1.30581	-2.13229	0.0329831	0.0472662	-1.37368	-2.3345	0.0195693	0.0321337	2.75654	2.71681	2.24137	2.16478	2.15378	69431	1700022N22Rik	1	0.972835	0.699708	0.663532	0.658492	69431	1700022N22Rik	0.481849	0.263458	0.254483	0
100039768	1700024F20Rik	-0.901628	0.000167258	0.000763907	-0.439962	0.095001	0.149278	-1.21735	0.00014416	0.000359736	0.364902	0.27794	0.395383	100039768	1700024F20Rik	-0.901628	-3.76394	0.000167259	0.000763903	-1.34159	-5.3248	1.01065e-07	3.59257e-07	-2.55894	-8.50462	1.82184e-17	5.90969e-17	-2.19403	-8.0624	7.48091e-16	3.05894e-15	5.9563	5.35631	5.05927	4.42545	4.60014	100039768	1700024F20Rik	1	0.659758	0.536992	0.346074	0.390622	100039768	1700024F20Rik	3.64538	1.53151	0.467159	0.200624
69399	1700025G04Rik	0.254018	0.00409432	0.0136869	-0.964617	7.59805e-26	6.87371e-25	-2.97117	8.1843e-115	8.2878e-113	0.528574	0.000266235	0.000815965	69399	1700025G04Rik	0.254018	2.8708	0.0040943	0.0136869	-0.710599	-7.75375	8.92205e-15	4.62678e-14	-3.68176	-28.7249	1.86738e-181	4.98578e-180	-3.15319	-28.3197	1.97793e-176	8.60766e-175	9.41215	9.59448	8.90911	7.16046	7.41498	69399	1700025G04Rik	0.881279	1	0.621845	0.185048	0.220752	69399	1700025G04Rik	4.68227	4.48882	1.55711	0.194472
69986	1700025N23Rik	0.285609	0.469895	0.633068	2.07299	2.7464e-09	1.10645e-08	0.0134946	0.963569	0.974244	-1.13272	0.000359645	0.00107704	69986	1700025N23Rik	0.28561	0.722652	0.469894	0.633069	2.3586	6.80276	1.02635e-11	4.66323e-11	2.37209	6.79214	1.1048e-11	2.9293e-11	1.23937	3.38949	0.000700232	0.00139571	3.6164	3.74835	4.89732	4.94135	4.2489	69986	1700025N23Rik	0.399162	0.437391	0.969941	1	0.618802	69986	1700025N23Rik	0.354904	0.434813	1.71818	1.40198
70004	1700028J19Rik	0.472479	0.179338	0.315796	-0.768277	0.0474067	0.0805909	0.04566	0.915619	0.938718	-0.400579	0.364597	0.48866	70004	1700028J19Rik	0.47248	1.3428	0.179338	0.315794	-0.295797	-0.755279	0.450082	0.659396	-0.250137	-0.626579	0.530935	0.590446	-0.650716	-1.61204	0.106953	0.152498	3.45819	3.71612	3.31199	3.33201	3.14743	70004	1700028J19Rik	0.836286	1	0.755694	0.766253	0.674229	70004	1700028J19Rik	0.508987	0.600247	0.231919	0.25211
76421	1700028K03Rik	-3.17909	2.43637e-08	1.87539e-07	2.41506	4.6792e-05	0.000128647	0.338757	0.432618	0.528969	-0.246924	0.560181	0.674861	76421	1700028K03Rik	-3.17909	-5.57776	2.43639e-08	1.87541e-07	-0.764034	-1.88743	0.0591026	0.11218	-0.425276	-1.06569	0.286564	0.344164	-0.6722	-1.69559	0.0899639	0.130354	3.99386	2.62211	3.54664	3.7472	3.57628	76421	1700028K03Rik	1	0.386423	0.733458	0.842846	0.748682	76421	1700028K03Rik	0.3827	0.0328817	0.105872	0.122761
66501	1700029H14Rik	1.04076	0.111506	0.218449	-2.60171	0.00186887	0.00417801	-1.37227	0.284073	0.374211	1.85175	0.132806	0.216302	66501	1700029H14Rik	1.04076	1.59146	0.111506	0.218448	-1.56095	-1.82466	0.0680531	0.127341	-2.93322	-2.50687	0.0121805	0.0185166	-1.08147	-1.38648	0.165601	0.225826	1.84655	2.36421	1.33656	1.18453	1.45066	66501	1700029H14Rik	0.698507	1	0.490508	0.441451	0.530877	66501	1700029H14Rik	0.202098	0.227906	0.0978409	0.0236353
75641	1700029I15Rik	0.474319	0.27803	0.437255	-0.379659	0.4036	0.502891	-0.343235	0.493602	0.587115	0.732894	0.129649	0.212107	75641	1700029I15Rik	0.47432	1.08476	0.278029	0.437254	0.0946605	0.206192	0.836641	0.974041	-0.248575	-0.51173	0.60884	0.663675	0.484319	1.10159	0.270638	0.348173	3.25963	3.4747	3.29299	3.12786	3.5093	75641	1700029I15Rik	0.841087	0.9763	0.860763	0.767673	1	75641	1700029I15Rik	1.56348	1.07748	1.41923	0.365698
69513	1700030C10Rik	-0.227654	0.7123	0.82397	-1.22113	0.104802	0.16274	0.563984	0.488786	0.582757	-1.06618	0.211133	0.316297	69513	1700030C10Rik	-0.227653	-0.368767	0.712302	0.823972	-1.44878	-1.97615	0.048138	0.093141	-0.884801	-1.27562	0.202089	0.251077	-1.95098	-2.5141	0.0119338	0.0202299	2.10874	2.00454	1.58209	1.79033	1.47866	69513	1700030C10Rik	1	0.93032	0.694163	0.80195	0.646141	69513	1700030C10Rik	0.20596	0.0412909	0	0.0385391
69528	1700030J22Rik	-0.776813	0.0335736	0.0840465	-2.03427	8.69262e-05	0.00023141	1.74751	0.00113175	0.00250514	1.85292	1.66433e-06	6.9353e-06	69528	1700030J22Rik	-0.776812	-2.12515	0.0335737	0.0840468	-2.81108	-5.60027	2.14013e-08	7.94335e-08	-1.06357	-2.71883	0.00655129	0.0102841	0.789355	2.34408	0.0190743	0.031396	4.43645	3.98169	3.13434	3.75848	4.95747	69528	1700030J22Rik	0.696877	0.508463	0.282607	0.435578	1	69528	1700030J22Rik	0.478886	0.228017	0.0347762	0.0336034
72254	1700030K09Rik	-0.864176	3.30483e-14	4.13927e-13	0.0812891	0.523843	0.618818	0.337231	0.00812418	0.015587	0.294076	0.0128706	0.0282534	72254	1700030K09Rik	-0.864176	-7.58578	3.30484e-14	4.13929e-13	-0.782887	-6.73939	1.59048e-11	7.13972e-11	-0.445655	-3.9165	8.98453e-05	0.000165511	-0.151579	-1.42955	0.152845	0.210103	7.32263	6.76947	6.81818	7.02972	7.22039	72254	1700030K09Rik	1	0.681523	0.704927	0.816254	0.931581	72254	1700030K09Rik	3.75184	1.57192	1.4758	1.60428
73261	1700037C18Rik	-0.0864502	0.654275	0.783717	-0.287141	0.161926	0.236317	0.120581	0.572762	0.660501	0.152251	0.463622	0.587992	73261	1700037C18Rik	-0.0864499	-0.44783	0.654276	0.783719	-0.373591	-1.85976	0.0629191	0.118663	-0.253011	-1.25214	0.210518	0.260763	-0.100759	-0.518218	0.604306	0.682328	6.07586	6.01704	5.83244	5.92076	6.01202	73261	1700037C18Rik	1	0.960054	0.844742	0.898074	0.956715	73261	1700037C18Rik	2.72362	1.75511	2.04066	1.6078
67326	1700037H04Rik	-0.0768544	0.458989	0.623337	-0.149746	0.152792	0.224974	-0.440131	3.58257e-05	9.63289e-05	0.315201	0.00307669	0.00776932	67326	1700037H04Rik	-0.0768542	-0.740511	0.45899	0.623335	-0.2266	-2.17234	0.0298303	0.059981	-0.666731	-6.31611	2.68224e-10	6.68501e-10	-0.35153	-3.3702	0.000751123	0.00149029	10.3531	10.2977	10.2016	9.92391	10.1217	67326	1700037H04Rik	1	0.962282	0.900279	0.742663	0.851774	67326	1700037H04Rik	48.2091	33.5861	30.5548	18.0739
76602	1700040D17Rik	-1.17835	0.117391	0.227477	-0.120469	0.888649	0.918553	-0.573971	0.557482	0.646155	0.430453	0.660206	0.760664	76602	1700040D17Rik	-1.17835	-1.56581	0.117392	0.227478	-1.29882	-1.65284	0.0983637	0.177224	-1.87279	-2.1155	0.0343877	0.0491213	-1.44234	-1.8339	0.0666693	0.0990705	1.81707	1.36638	1.31864	1.20019	1.28828	76602	1700040D17Rik	1	0.731693	0.70788	0.652078	0.693135	76602	1700040D17Rik	0.276266	0.103849	0	0.0646185
73321	1700042O10Rik	3.14083	0.000597061	0.00244933	-1.82106	0.0206336	0.0380749	0.383451	0.670239	0.745734	-0.316951	0.718028	0.807248	73321	1700042O10Rik	3.14083	3.43295	0.000597051	0.00244928	1.31977	1.27618	0.20189	0.335571	1.70323	1.67912	0.093128	0.123665	1.38627	1.36642	0.171807	0.233145	0.856129	1.77266	1.11802	1.20174	1.13793	73321	1700042O10Rik	0.529782	1	0.635237	0.673188	0.644064	73321	1700042O10Rik	0.0661753	0.265337	0.0640744	0
100503166	1700048M11Rik	-2.8629	0.000240548	0.00106649	0.940903	0.298313	0.395433	1.08214	0.139224	0.202715	0.226065	0.711225	0.802063	100503166	1700048M11Rik	-2.86289	-3.67212	0.000240549	0.00106649	-1.92199	-2.88593	0.00390254	0.0090016	-0.839847	-1.47394	0.140497	0.180613	-0.613781	-1.15826	0.246757	0.321187	2.44486	1.48261	1.68575	2.03888	2.13599	100503166	1700048M11Rik	1	0.513255	0.590859	0.754724	0.807275	100503166	1700048M11Rik	1.10463	0.0738192	0.0713044	0.137799
73431	1700052K11Rik	-0.461048	0.00375541	0.0126809	1.10645	2.50455e-12	1.23156e-11	-0.195105	0.190737	0.266306	0.0751825	0.613614	0.721528	73431	1700052K11Rik	-0.461048	-2.89801	0.00375542	0.012681	0.6454	4.4467	8.72003e-06	2.67684e-05	0.450294	2.99628	0.00273298	0.00445599	0.525477	3.62568	0.000288204	0.000597398	6.24793	5.97089	6.66172	6.53005	6.57815	73431	1700052K11Rik	0.750651	0.619499	1	0.912775	0.943721	73431	1700052K11Rik	1.48819	0.768038	1.49801	1.15799
73405	1700055D18Rik	-0.674636	0.056061	0.126744	1.46159	2.54794e-05	7.23714e-05	0.141098	0.63742	0.717664	-1.08535	0.000917153	0.00256414	73405	1700055D18Rik	-0.674635	-1.91056	0.0560612	0.126745	0.786951	2.57929	0.00990046	0.0215467	0.928049	3.02974	0.00244764	0.00401192	-0.1573	-0.472789	0.636363	0.710526	3.86595	3.5572	4.3296	4.41858	3.79537	73405	1700055D18Rik	0.681775	0.550424	0.940184	1	0.649226	73405	1700055D18Rik	0.360651	0.180759	0.480152	0.485048
73363	1700056E22Rik	-0.42754	0.262678	0.419617	-0.908266	0.0454576	0.0776475	-1.20728	0.0512094	0.0839635	0.291296	0.661	0.761236	73363	1700056E22Rik	-0.427539	-1.12008	0.262679	0.419618	-1.33581	-3.0582	0.00222673	0.00531597	-2.54308	-4.47271	7.72329e-06	1.53387e-05	-2.25178	-4.51237	6.41087e-06	1.54586e-05	3.55509	3.28629	2.83384	2.36962	2.47551	73363	1700056E22Rik	1	0.83001	0.606574	0.439684	0.473167	73363	1700056E22Rik	0.625312	0.479329	0.284923	0.103243
78625	1700061G19Rik	-0.270146	0.382518	0.549832	-0.414367	0.23507	0.323796	-0.577578	0.160626	0.229511	0.187458	0.656748	0.758221	78625	1700061G19Rik	-0.270146	-0.873264	0.382519	0.549834	-0.684513	-2.04595	0.0407614	0.0798188	-1.26209	-3.3327	0.000860073	0.00146954	-1.07463	-3.09627	0.00195974	0.00369655	4.03838	3.86591	3.64868	3.34952	3.43633	78625	1700061G19Rik	1	0.887323	0.763285	0.620345	0.658815	78625	1700061G19Rik	0.449143	0.217849	0.182371	0.149109
73467	1700066M21Rik	-0.836881	7.24217e-17	1.08335e-15	-0.473188	4.47677e-05	0.000123515	0.254916	0.0374717	0.0635089	0.718083	1.34676e-10	8.47911e-10	73467	1700066M21Rik	-0.836881	-8.34301	7.24221e-17	1.08336e-15	-1.31007	-12.0341	2.35266e-33	2.32524e-32	-1.05515	-9.78405	1.31834e-22	4.98462e-22	-0.33707	-3.48672	0.000488989	0.000991234	7.99183	7.43868	7.14194	7.30084	7.7623	73467	1700066M21Rik	1	0.681531	0.554827	0.619427	0.85291	73467	1700066M21Rik	5.0847	2.3588	1.29379	1.21697
73453	1700067K01Rik	-1.12715	0.00446134	0.0147409	-1.51354	0.00563237	0.0116282	1.58367	0.00455137	0.00912717	0.553796	0.198213	0.300825	73453	1700067K01Rik	-1.12715	-2.84355	0.00446137	0.014741	-2.64069	-5.09541	3.47979e-07	1.19357e-06	-1.05702	-2.56526	0.0103097	0.015839	-0.503221	-1.33426	0.182117	0.24562	4.03122	3.36789	2.75876	3.41418	3.71048	73453	1700067K01Rik	1	0.631418	0.413952	0.652006	0.800659	73453	1700067K01Rik	0.656259	0.164459	0.127085	0.337697
73504	1700071M16Rik	-0.423252	0.419795	0.585808	-0.0035906	0.995037	0.996305	3.14223	2.65581e-10	1.1131e-09	0.271492	0.46415	0.588514	73504	1700071M16Rik	-0.423252	-0.806775	0.419796	0.58581	-0.426842	-0.78887	0.430188	0.636178	2.71538	6.24313	4.28901e-10	1.05927e-09	2.98688	6.96569	3.26809e-12	1.14823e-11	3.19777	3.01549	3.05598	4.75181	4.91678	73504	1700071M16Rik	0.303757	0.267704	0.275322	0.891945	1	73504	1700071M16Rik	0.17046	0.113913	0.013754	0.465155
67350	1700084E18Rik	-1.07286	0.203388	0.347285	0.114846	0.902966	0.929387	-1.27946	0.267285	0.356199	2.00994	0.0674754	0.121914	67350	1700084E18Rik	-1.07285	-1.27196	0.203388	0.347286	-0.958008	-1.12035	0.262567	0.421935	-2.23747	-2.0817	0.0373699	0.0530887	-0.227525	-0.291618	0.770579	0.824617	1.40733	1.12122	1.14098	0.920448	1.37698	67350	1700084E18Rik	1	0.820109	0.831416	0.713564	0.979181	67350	1700084E18Rik	0.49061	0.16393	0	0.0765023
73486	1700084J12Rik	1.05946	0.13366	0.251637	-2.92941	0.00498801	0.010389	1.57715	0.164123	0.233848	-0.712532	0.45827	0.582941	73486	1700084J12Rik	1.05947	1.49983	0.133659	0.251638	-1.86994	-1.74907	0.0802791	0.147643	-0.29279	-0.350785	0.72575	0.768976	-1.00532	-1.13752	0.255319	0.330657	1.30005	1.68617	0.914501	1.20944	1.0444	73486	1700084J12Rik	0.765189	1	0.585741	0.718607	0.640928	73486	1700084J12Rik	0.0973166	0.438977	0	0.0455247
73516	1700086O06Rik	-0.147379	0.363289	0.530189	-0.32086	0.0700339	0.113816	-0.0462657	0.808054	0.858308	-0.462915	0.0194	0.0408818	73516	1700086O06Rik	-0.147378	-0.909115	0.36329	0.53019	-0.468238	-2.72874	0.00635764	0.0142408	-0.514504	-2.91341	0.00357509	0.00577511	-0.977419	-5.43057	5.61752e-08	1.56757e-07	6.12253	6.02637	5.81474	5.78782	5.50893	73516	1700086O06Rik	1	0.935526	0.807879	0.792948	0.653567	73516	1700086O06Rik	2.39461	1.56947	1.26631	1.03403
67349	1700086P04Rik	-0.109715	0.835952	0.904954	-0.719979	0.247884	0.338978	0.41779	0.531523	0.621854	-0.809836	0.241793	0.353516	67349	1700086P04Rik	-0.109714	-0.207072	0.835954	0.903676	-0.829693	-1.37402	0.169436	0.288316	-0.411903	-0.708055	0.478911	0.540406	-1.22174	-1.93752	0.0526813	0.0798864	2.21691	2.17348	1.90014	2.05555	1.79145	67349	1700086P04Rik	1	0.970347	0.802863	0.894182	0.744603	67349	1700086P04Rik	0.209642	0.280194	0.135324	0.13076
74307	1700092M07Rik	0.456139	0.602989	0.743687	-0.0502163	0.955042	0.967057	-0.531489	0.595576	0.681353	-0.318648	0.767881	0.845729	74307	1700092M07Rik	0.456139	0.520108	0.602989	0.743686	0.405923	0.450025	0.652692	0.872758	-0.125566	-0.126941	0.898987	0.91789	-0.444214	-0.44948	0.653085	0.725357	0.746355	0.870065	0.824485	0.719805	0.664971	74307	1700092M07Rik	0.917824	1	0.9689	0.901088	0.867482	74307	1700092M07Rik	0.374413	0.281484	0	0.17515
67358	1700093K21Rik	-1.37103	0.00699448	0.0218478	-0.978524	0.127945	0.193192	0.32003	0.650202	0.728709	1.08678	0.0782083	0.138273	67358	1700093K21Rik	-1.37103	-2.69711	0.00699452	0.0218479	-2.34955	-3.91904	8.89007e-05	0.000248706	-2.02952	-3.4633	0.000533584	0.000925366	-0.94274	-1.91661	0.0552881	0.0835083	3.39708	2.66482	2.29248	2.39146	2.82024	67358	1700093K21Rik	1	0.601961	0.465032	0.498058	0.670432	67358	1700093K21Rik	0.762022	0.172483	0.119005	0.13799
73545	1700094D03Rik	-0.768696	0.000226439	0.00100919	-0.0548601	0.801663	0.853309	1.17621	3.48076e-08	1.23887e-07	-0.19414	0.342016	0.464204	73545	1700094D03Rik	-0.768695	-3.68753	0.000226441	0.0010092	-0.823555	-3.89656	9.75691e-05	0.000271769	0.352659	1.73663	0.0824526	0.110669	0.158519	0.78348	0.433345	0.519307	7.09452	6.60846	6.56231	7.32125	7.20199	73545	1700094D03Rik	0.854573	0.610142	0.59093	1	0.92066	73545	1700094D03Rik	2.44632	1.0937	1.16765	1.42914
67927	1700096J18Rik	2.77728	0.000141237	0.000656191	-1.51703	0.0160472	0.0303027	1.94361	0.00201674	0.00428693	-1.92514	0.00165868	0.00440492	67927	1700096J18Rik	2.77728	3.806	0.000141234	0.000656181	1.26025	1.52606	0.126995	0.223	3.20386	4.39339	1.11596e-05	2.19411e-05	1.27872	1.57327	0.115657	0.163576	1.48503	2.40582	1.78988	2.61146	1.79239	67927	1700096J18Rik	0.458045	0.867153	0.56582	1	0.566806	67927	1700096J18Rik	0.156693	0.628276	0.379295	0.659706
73571	1700096K18Rik	-0.519408	0.00693743	0.0216873	-0.702507	0.00177689	0.00398828	-0.96885	0.000767551	0.00174071	0.675835	0.0204964	0.0429499	73571	1700096K18Rik	-0.519407	-2.69983	0.00693746	0.0216873	-1.22191	-5.69245	1.25232e-08	4.72859e-08	-2.19076	-8.31457	9.20871e-17	2.91476e-16	-1.51493	-6.89792	5.27705e-12	1.8372e-11	5.72774	5.38246	4.93112	4.43832	4.78519	73571	1700096K18Rik	1	0.787155	0.575697	0.409116	0.52031	73571	1700096K18Rik	2.70022	1.23032	0.475362	0.321532
76624	1700099I09Rik	-0.232437	0.570897	0.717156	-0.551011	0.243342	0.333697	1.69396	0.000163699	0.000405655	-1.63686	0.000177931	0.000558972	76624	1700099I09Rik	-0.232436	-0.56673	0.570898	0.717157	-0.783448	-1.72576	0.0843908	0.154418	0.910508	2.3745	0.0175727	0.0261645	-0.726351	-1.64542	0.0998839	0.143396	3.31409	3.19467	2.96317	3.79506	2.99323	76624	1700099I09Rik	0.716496	0.659574	0.561792	1	0.57362	76624	1700099I09Rik	0.893171	0.263329	0.508715	0.786494
100504641	1700101I11Rik	0.754034	0.161737	0.292088	-2.55902	0.000680869	0.00162415	0.406755	0.651568	0.729615	-0.854425	0.365187	0.48928	100504641	1700101I11Rik	0.754035	1.39926	0.161736	0.292086	-1.80498	-2.36033	0.0182589	0.0380676	-1.39823	-1.91207	0.0558668	0.0772095	-2.25265	-2.76383	0.00571272	0.0101353	2.09504	2.45348	1.47268	1.58649	1.39056	100504641	1700101I11Rik	0.780008	1	0.506696	0.548288	0.478661	100504641	1700101I11Rik	0.220653	0.486602	0.128189	0.0412885
68230	1700102H20Rik	-0.709691	0.181103	0.318075	0.543886	0.332206	0.431684	-0.993252	0.115523	0.17274	-0.45604	0.527636	0.646587	68230	1700102H20Rik	-0.70969	-1.33737	0.181103	0.318076	-0.165804	-0.324791	0.745339	0.953338	-1.15906	-1.91706	0.0552309	0.0764095	-1.6151	-2.60509	0.00918507	0.0158396	2.50725	2.18242	2.42311	2.03676	1.90136	68230	1700102H20Rik	1	0.798396	0.943349	0.721719	0.657068	68230	1700102H20Rik	0.379068	0.12666	0.367034	0.118219
112418	1700102P08Rik	0.811327	0.057111	0.128504	-2.80461	1.75457e-05	5.08581e-05	2.97368	6.24013e-06	1.81885e-05	-0.716994	0.103468	0.174937	112418	1700102P08Rik	0.811328	1.90246	0.0571107	0.128503	-1.99328	-3.00108	0.00269026	0.00635456	0.980396	2.2584	0.0239206	0.034997	0.263403	0.586176	0.557757	0.641347	2.98778	3.40076	2.29738	3.46304	3.11612	112418	1700102P08Rik	0.719338	0.95775	0.445762	1	0.786261	112418	1700102P08Rik	0.323063	0.58291	0.0312807	0.241806
77036	1700109H08Rik	1.91753	5.79017e-11	5.75187e-10	-1.23065	1.93032e-05	5.56443e-05	-0.315521	0.346199	0.441174	-0.804833	0.0311249	0.0622341	77036	1700109H08Rik	1.91753	6.54906	5.79006e-11	5.75176e-10	0.68688	2.13626	0.0326581	0.0650996	0.371359	1.09523	0.273415	0.329851	-0.433473	-1.19939	0.230376	0.302304	3.88635	5.03738	4.26476	4.08163	3.67098	77036	1700109H08Rik	0.450305	1	0.585353	0.515573	0.387858	77036	1700109H08Rik	1.24368	3.49067	0.867021	0.511977
76634	1700110C19Rik	-1.65927	0.0562056	0.12696	-1.94504	0.136206	0.203841	2.82894	0.0254198	0.0445102	-0.984192	0.32083	0.441945	76634	1700110C19Rik	-1.65927	-1.90944	0.0562058	0.12696	-3.60431	-3.01649	0.00255719	0.00605825	-0.775377	-0.957595	0.338267	0.399307	-1.75957	-1.9554	0.050536	0.0769666	1.18305	0.680261	0.448303	0.885911	0.669365	76634	1700110C19Rik	1	0.705741	0.600923	0.813865	0.700431	76634	1700110C19Rik	0.344854	0.0493832	0	0.0921843
73558	1700110K17Rik	1.67145	0.00612232	0.0194165	-1.40085	0.0267284	0.048045	-3.94455	0.000815695	0.00184218	1.6373	0.239896	0.351413	73558	1700110K17Rik	1.67146	2.74116	0.00612227	0.0194164	0.270606	0.390658	0.69605	0.912043	-3.67395	-3.14982	0.00163373	0.00272282	-2.03665	-2.00567	0.0448915	0.069164	1.46599	2.21092	1.54697	0.892249	1.01743	73558	1700110K17Rik	0.5967	1	0.631151	0.400905	0.437246	73558	1700110K17Rik	0.301434	0.453237	0.145932	0
73590	1700112H15Rik	-0.368572	0.657924	0.786183	0.21582	0.809759	0.859703	1.99369	0.010123	0.0191343	-2.02343	0.00791695	0.0182997	73590	1700112H15Rik	-0.368571	-0.44278	0.657925	0.786184	-0.152751	-0.183124	0.854701	0.974041	1.84094	2.63082	0.00851779	0.0132149	-0.182492	-0.222026	0.824294	0.868372	1.29624	1.20996	1.26078	2.00577	1.2618	73590	1700112H15Rik	0.61152	0.576021	0.596673	1	0.597092	73590	1700112H15Rik	0.274313	0.229143	0.0442674	0.513293
76642	1700113A16Rik	0.284016	0.000528971	0.00219469	-2.01897	5.51663e-93	1.9546e-91	-0.336086	0.00508875	0.0101323	1.06499	3.08361e-21	4.20612e-20	76642	1700113A16Rik	0.284016	3.46564	0.000528969	0.00219468	-1.73496	-17.597	2.59526e-69	5.02984e-68	-2.07104	-19.4232	4.91673e-84	5.25793e-83	-1.00605	-11.2467	2.40547e-29	1.49603e-28	8.66202	8.86	7.53743	7.34424	7.98876	76642	1700113A16Rik	0.871767	1	0.399822	0.349711	0.546677	76642	1700113A16Rik	24.8587	21.7265	4.51959	3.45311
73600	1700120C14Rik	0.257737	0.656	0.785103	-0.91708	0.161908	0.236313	0.204863	0.775947	0.83186	-0.842057	0.271385	0.38804	73600	1700120C14Rik	0.257739	0.445445	0.655998	0.785102	-0.659342	-1.00964	0.312668	0.489601	-0.454479	-0.698295	0.484993	0.546539	-1.29654	-1.84308	0.0653171	0.0972368	2.13081	2.24869	1.84112	1.95837	1.69708	73600	1700120C14Rik	0.921543	1	0.753896	0.817721	0.68226	73600	1700120C14Rik	0.458366	0.551361	0.710103	0.257308
68232	1700120K04Rik	1.28841	0.00821472	0.0251164	-0.909193	0.0676552	0.110398	0.516777	0.327036	0.420413	-0.858115	0.112127	0.187487	68232	1700120K04Rik	1.28841	2.64312	0.00821465	0.0251162	0.379218	0.708466	0.478656	0.691873	0.895995	1.73044	0.0835525	0.112014	0.03788	0.0691224	0.944892	0.956463	2.54043	3.15578	2.6262	2.92042	2.56436	68232	1700120K04Rik	0.652773	1	0.692756	0.849473	0.663689	68232	1700120K04Rik	0.52404	0.722286	0	0.551578
73619	1700122E12Rik	-3.01315	0.0102541	0.030399	0.227711	0.877932	0.910835	2.10929	0.0889763	0.137174	-0.435536	0.647191	0.750524	73619	1700122E12Rik	-3.01315	-2.56714	0.0102541	0.0303991	-2.78544	-2.37888	0.0173653	0.0363597	-0.676153	-0.797951	0.424899	0.487487	-1.11169	-1.29274	0.196102	0.262437	1.11081	0.430102	0.454608	0.852633	0.723312	73619	1700122E12Rik	1	0.62386	0.634548	0.836146	0.764456	73619	1700122E12Rik	0.297029	0	0.1438	0.069475
73617	1700122H20Rik	0.336324	0.5935	0.735477	-0.581116	0.388854	0.488433	-1.17963	0.167021	0.237439	1.19155	0.158891	0.250865	73617	1700122H20Rik	0.336326	0.533774	0.593498	0.735475	-0.24479	-0.362734	0.716803	0.928327	-1.42442	-1.73895	0.0820437	0.110143	-0.232869	-0.350275	0.726132	0.787557	2.05663	2.22576	1.99151	1.65531	1.97598	73617	1700122H20Rik	0.889383	1	0.850129	0.673408	0.841029	73617	1700122H20Rik	0.776998	0.432702	0.250777	0.161546
100503636	1700123M08Rik	0.167815	0.686757	0.805925	-1.44314	0.00412691	0.00872285	0.0368802	0.949674	0.963236	0.0310137	0.956714	0.974009	100503636	1700123M08Rik	0.167816	0.403263	0.686755	0.805923	-1.27532	-2.55303	0.010679	0.0230866	-1.23844	-2.4217	0.0154482	0.0231881	-1.20743	-2.49248	0.0126855	0.0214225	3.27757	3.34084	2.61942	2.68105	2.68	100503636	1700123M08Rik	0.957093	1	0.606499	0.632967	0.632508	100503636	1700123M08Rik	0.500505	0.635496	0	0.0936544
58248	1700123O20Rik	0.0549303	0.616653	0.753741	-0.139447	0.209019	0.293476	0.888533	8.50436e-16	4.96225e-15	0.168503	0.120049	0.19865	58248	1700123O20Rik	0.0549305	0.500602	0.616651	0.75374	-0.0845164	-0.764656	0.444476	0.652929	0.804017	7.36663	1.74998e-13	4.9695e-13	0.972519	8.96324	3.15278e-19	1.46293e-18	9.68998	9.72138	9.63176	10.2175	10.3302	58248	1700123O20Rik	0.641601	0.655719	0.616226	0.924839	1	58248	1700123O20Rik	18.2271	14.3638	13.5098	18.445
67934	1700124L16Rik	-2.54424	0.0372977	0.0917204	1.79453	0.169379	0.245165	0.135626	0.902005	0.930257	-0.572249	0.615234	0.722933	67934	1700124L16Rik	-2.54424	-2.08249	0.0372978	0.0917207	-0.749711	-0.753947	0.450881	0.660236	-0.614086	-0.613491	0.539552	0.598579	-1.18634	-1.14598	0.251802	0.326806	0.682759	0.256054	0.516048	0.548444	0.438027	67934	1700124L16Rik	1	0.743959	0.890872	0.911103	0.843973	67934	1700124L16Rik	0.40767	0	0.197364	0
66276	1810009A15Rik	-0.175471	0.254782	0.410297	-0.430394	0.00580102	0.0119367	-0.163322	0.301988	0.393578	0.758165	1.34622e-06	5.65898e-06	66276	1810009A15Rik	-0.175471	-1.13881	0.254783	0.410296	-0.605865	-3.89968	9.63198e-05	0.000268516	-0.769188	-4.92012	8.64904e-07	1.82101e-06	-0.0110222	-0.0715795	0.942937	0.955012	9.52831	9.40301	9.12853	9.03133	9.51903	66276	1810009A15Rik	1	0.916813	0.757974	0.708587	0.993587	66276	1810009A15Rik	48.5824	33.6835	29.344	20.2377
100040049	1810010D01Rik	0.57545	0.0227512	0.0602738	-2.6383	4.07925e-14	2.20862e-13	1.32642	0.000467959	0.00109204	0.966591	0.00106769	0.00294948	100040049	1810010D01Rik	0.57545	2.27759	0.0227511	0.0602734	-2.06285	-5.8663	4.45628e-09	1.73173e-08	-0.736426	-2.51469	0.0119137	0.0181334	0.230165	0.888067	0.374505	0.460262	4.93974	5.31942	3.86996	4.50809	5.07788	100040049	1810010D01Rik	0.768607	1	0.366158	0.569857	0.845839	100040049	1810010D01Rik	1.97818	2.55493	0.331508	0.640656
69066	1810010H24Rik	-0.227084	0.586416	0.729294	-1.58358	0.00357023	0.0076305	0.495472	0.417605	0.514944	-0.112629	0.84415	0.895974	69066	1810010H24Rik	-0.227084	-0.544036	0.586417	0.729296	-1.81066	-3.41151	0.000646031	0.00164737	-1.31519	-2.61692	0.00887262	0.0137362	-1.42782	-2.93735	0.00331033	0.00607215	3.27562	3.13573	2.40321	2.59775	2.55847	69066	1810010H24Rik	1	0.907591	0.546235	0.625091	0.608298	69066	1810010H24Rik	0.549706	0.38896	0.0939273	0.151266
69050	1810013A23Rik	1.63781	0.00730454	0.0226637	-3.38312	0.000143205	0.000370977	2.66621	0.0036818	0.00748957	-0.478837	0.461119	0.58535	69050	1810013A23Rik	1.63781	2.68263	0.00730448	0.0226636	-1.74531	-1.8865	0.0592271	0.112373	0.920899	1.41365	0.157464	0.200472	0.442062	0.670152	0.502761	0.588558	2.05717	2.83561	1.6661	2.42544	2.17182	69050	1810013A23Rik	0.582998	1	0.444573	0.752536	0.631218	69050	1810013A23Rik	0.341192	0.855028	0.0825899	0.159609
69053	1810013L24Rik	1.16664	1.85616e-52	8.56405e-51	-0.460249	1.63946e-09	6.69083e-09	1.04048	1.85911e-42	3.12425e-41	-0.489357	8.98863e-11	5.73938e-10	69053	1810013L24Rik	1.16664	15.2422	1.85612e-52	8.56386e-51	0.706391	9.14643	5.88463e-20	3.81157e-19	1.74687	22.8628	1.09005e-115	1.66069e-114	1.25752	16.4314	1.14087e-60	1.34437e-59	10.6328	11.3667	11.068	11.763	11.4292	69053	1810013L24Rik	0.45685	0.759797	0.617715	1	0.793437	69053	1810013L24Rik	15.7416	27.7081	14.5487	27.8465
66263	1810014B01Rik	-0.466757	0.00827505	0.0252655	-1.21525	5.64988e-08	2.06907e-07	-0.132129	0.61998	0.702767	0.419693	0.0993057	0.169037	66263	1810014B01Rik	-0.466757	-2.64064	0.00827508	0.0252656	-1.68201	-7.81129	5.66064e-15	2.96493e-14	-1.81414	-7.94271	1.97806e-15	5.98182e-15	-1.39444	-6.95231	3.59354e-12	1.26042e-11	5.86696	5.55634	4.82799	4.75189	4.97909	66263	1810014B01Rik	1	0.806296	0.486672	0.461669	0.540411	66263	1810014B01Rik	1.99802	1.05643	0.446445	0.472473
69120	1810021B22Rik	-0.313023	0.327876	0.493845	-1.74232	7.00959e-06	2.13016e-05	0.297801	0.492965	0.586713	0.290103	0.476481	0.60059	69120	1810021B22Rik	-0.313022	-0.978399	0.327877	0.493847	-2.05535	-5.39588	6.81893e-08	2.45205e-07	-1.75755	-4.68449	2.8066e-06	5.72686e-06	-1.46744	-4.19384	2.74272e-05	6.27506e-05	4.92279	4.70116	3.74425	3.90262	4.0325	69120	1810021B22Rik	1	0.857598	0.4418	0.49306	0.539505	69120	1810021B22Rik	2.9913	1.14488	0.210642	0.508846
69126	1810022K09Rik	0.41943	0.00220581	0.00788715	0.373936	0.00547808	0.0113331	-0.19001	0.165704	0.235738	-0.303754	0.0307757	0.0616239	69126	1810022K09Rik	0.41943	3.06103	0.0022058	0.00788711	0.793366	5.84998	4.91626e-09	1.9034e-08	0.603355	4.3273	1.50945e-05	2.94328e-05	0.299601	2.15202	0.0313956	0.0497886	6.68419	6.95144	7.18798	7.06902	6.87489	69126	1810022K09Rik	0.705249	0.848777	1	0.920848	0.804918	69126	1810022K09Rik	10.7329	11.381	14.257	8.71383
329509	1810024B03Rik	0.0399077	0.905618	0.948314	-0.668198	0.0721663	0.116993	-0.277086	0.50817	0.600711	0.0815813	0.846289	0.897159	329509	1810024B03Rik	0.0399084	0.11857	0.905616	0.945405	-0.62829	-1.71753	0.0858822	0.156757	-0.905376	-2.33334	0.0196301	0.0290637	-0.823795	-2.23703	0.0252846	0.0407217	4.08422	4.07907	3.68534	3.60117	3.63613	329509	1810024B03Rik	1	0.996437	0.758451	0.715467	0.733015	329509	1810024B03Rik	0.758585	0.535102	0.489668	0.210291
69170	1810026B05Rik	0.0363976	0.649424	0.780035	-0.159491	0.0520067	0.0875292	0.225304	0.00675242	0.0131398	-0.29464	0.000381114	0.00113822	69170	1810026B05Rik	0.0363977	0.454564	0.649423	0.780037	-0.123093	-1.51335	0.130192	0.227927	0.102212	1.25888	0.208073	0.257953	-0.192428	-2.373	0.0176441	0.0292026	9.44447	9.46633	9.36265	9.51101	9.31927	69170	1810026B05Rik	0.954926	0.969506	0.902273	1	0.875548	69170	1810026B05Rik	6.98521	5.80264	4.27905	4.09592
69155	1810030O07Rik	-0.0584826	0.40663	0.573128	-0.388129	1.1516e-07	4.11743e-07	0.310424	3.18581e-05	8.60809e-05	0.358997	6.913e-07	3.00577e-06	69155	1810030O07Rik	-0.0584826	-0.829838	0.40663	0.573129	-0.446612	-6.1696	6.84613e-10	2.80546e-09	-0.136188	-1.89318	0.0583333	0.0804247	0.222809	3.18232	0.001461	0.00280208	9.89779	9.85779	9.60998	9.80783	10.0436	69155	1810030O07Rik	0.903872	0.879156	0.7404	0.849234	1	69155	1810030O07Rik	17.3421	13.4329	8.12795	9.12183
66293	1810032O08Rik	0.680962	1.98111e-06	1.21289e-05	-0.505105	0.000493206	0.00120021	-0.333128	0.0275714	0.0479142	-0.468851	0.00255576	0.00655765	66293	1810032O08Rik	0.680962	4.75534	1.98109e-06	1.21288e-05	0.175857	1.20247	0.229182	0.374935	-0.157271	-1.05193	0.292833	0.350907	-0.626122	-4.15699	3.22471e-05	7.34189e-05	7.82531	8.27585	7.92641	7.7244	7.43055	66293	1810032O08Rik	0.731772	1	0.784891	0.682334	0.556596	66293	1810032O08Rik	5.64619	7.05238	4.1735	2.69961
66503	1810034E14Rik	-0.505004	0.00469759	0.0154244	-1.94385	2.47277e-15	1.43857e-14	0.114093	0.69915	0.77069	0.856762	0.0011749	0.00321491	66503	1810034E14Rik	-0.505004	-2.82707	0.00469762	0.0154244	-2.44885	-10.2431	1.27108e-24	9.69103e-24	-2.33476	-9.63232	5.83951e-22	2.17416e-21	-1.478	-7.41442	1.22162e-13	4.59223e-13	6.12425	5.76502	4.62286	4.68478	5.16192	66503	1810034E14Rik	1	0.77958	0.353213	0.368702	0.513226	66503	1810034E14Rik	2.64499	1.06845	0.36313	0.369351
67704	1810037I17Rik	0.424956	0.12795	0.243096	0.133825	0.631529	0.71359	-1.06375	0.000521968	0.00121052	0.0153204	0.96209	0.977589	67704	1810037I17Rik	0.424957	1.52224	0.127949	0.243096	0.558781	1.99268	0.0462964	0.0897791	-0.504971	-1.64625	0.0997125	0.131691	-0.489651	-1.64556	0.099854	0.143371	5.08696	5.33207	5.4132	4.7916	4.78609	67704	1810037I17Rik	0.797612	0.945316	1	0.649948	0.647471	67704	1810037I17Rik	1.34842	1.42473	2.11721	0.443259
67884	1810043G02Rik	-0.102237	0.319309	0.485043	-1.30165	9.22536e-30	9.47652e-29	-0.679446	5.72348e-07	1.83338e-06	1.68035	4.4924e-39	1.51241e-37	67884	1810043G02Rik	-0.102237	-0.995878	0.319309	0.485044	-1.40389	-12.3708	3.76086e-35	3.88943e-34	-2.08333	-16.569	1.1674e-61	9.37242e-61	-0.402979	-3.85478	0.000115836	0.000250691	8.4498	8.37768	7.53469	7.14142	8.17506	67884	1810043G02Rik	1	0.951237	0.530304	0.403774	0.826598	67884	1810043G02Rik	11.2412	7.73639	3.00538	1.62861
69798	1810044D09Rik	-0.371282	0.194191	0.335584	-0.417859	0.174438	0.251467	-1.61938	3.96014e-05	0.000105964	0.768091	0.061581	0.112754	69798	1810044D09Rik	-0.371281	-1.29828	0.194192	0.335586	-0.789141	-2.63862	0.00832453	0.0183361	-2.40852	-6.38271	1.73983e-10	4.3701e-10	-1.64043	-5.10961	3.22822e-07	8.56519e-07	5.14532	4.8612	4.63167	3.8134	4.1498	69798	1810044D09Rik	1	0.821241	0.700447	0.397238	0.501555	69798	1810044D09Rik	4.24489	1.68736	1.62988	0.410846
72056	1810055G02Rik	0.101583	0.435142	0.600009	0.249996	0.0571525	0.0951189	0.194779	0.137571	0.200717	0.351877	0.00573712	0.0136951	72056	1810055G02Rik	0.101583	0.780425	0.435141	0.600008	0.351578	2.70486	0.0068333	0.0152409	0.546357	4.20577	2.60197e-05	4.98765e-05	0.898235	7.12013	1.07827e-12	3.88809e-12	7.5549	7.61698	7.76958	7.89744	8.13023	72056	1810055G02Rik	0.671136	0.700643	0.778814	0.850989	1	72056	1810055G02Rik	4.76272	3.8648	3.33054	3.81943
67705	1810058I24Rik	0.110434	0.250722	0.405635	-0.591392	1.0345e-09	4.28203e-09	-0.863203	2.88607e-18	1.93341e-17	0.0729167	0.465248	0.589663	67705	1810058I24Rik	0.110434	1.1486	0.250721	0.405634	-0.480958	-4.96994	6.69739e-07	2.24749e-06	-1.34416	-13.672	1.49328e-42	8.74692e-42	-1.27124	-13.0239	8.94998e-39	6.87335e-38	11.2696	11.3419	10.9432	10.397	10.4409	67705	1810058I24Rik	0.951164	1	0.758538	0.519483	0.535536	67705	1810058I24Rik	92.0921	76.4577	51.0516	21.4445
69820	1810059H22Rik	-2.02854	0.120518	0.232155	2.34742	0.0770208	0.124093	1.3137	0.165101	0.235049	1.06419	0.163794	0.257333	69820	1810059H22Rik	-2.02854	-1.5526	0.120518	0.232155	0.318883	0.311969	0.755064	0.961317	1.63259	1.78013	0.0750541	0.101604	2.69678	3.14826	0.00164244	0.0031271	0.901485	0.705807	1.02165	1.39659	1.90877	69820	1810059H22Rik	0.49748	0.434381	0.540692	0.701159	1	69820	1810059H22Rik	0.0464957	0.0233037	0	0
72282	1810062G17Rik	0.488034	0.320672	0.486053	-1.2304	0.0305659	0.0542962	-0.912818	0.226589	0.308861	-0.555265	0.529249	0.647992	72282	1810062G17Rik	0.488035	0.99308	0.320671	0.486052	-0.74237	-1.29277	0.196091	0.32722	-1.65519	-2.37002	0.017787	0.0264616	-2.21045	-3.01076	0.00260591	0.00483856	2.37557	2.62939	2.05204	1.77273	1.6358	72282	1810062G17Rik	0.838672	1	0.670196	0.55223	0.502228	72282	1810062G17Rik	0.390442	0.430518	0.189023	0.0730593
75602	1810062O18Rik	0.913552	0.0831649	0.172735	-0.371732	0.481151	0.578658	0.418312	0.442341	0.539136	-1.18563	0.0445616	0.0853777	75602	1810062O18Rik	0.913553	1.73261	0.0831645	0.172734	0.54182	0.972596	0.330754	0.512627	0.960132	1.76455	0.0776392	0.104733	-0.2255	-0.374626	0.707939	0.771917	2.23843	2.6514	2.48687	2.66522	2.18833	75602	1810062O18Rik	0.743913	0.990467	0.883714	1	0.718524	75602	1810062O18Rik	0.142087	0.332334	0.137577	0.221561
76770	2010005H15Rik	1.31754	0.154878	0.282262	-0.186078	0.822078	0.869146	2.85273	3.61629e-05	9.71939e-05	1.49846	8.17768e-05	0.000270728	76770	2010005H15Rik	1.31754	1.42251	0.154877	0.282262	1.13146	1.16506	0.243994	0.396163	3.98419	4.94142	7.75553e-07	1.63739e-06	5.48265	7.01436	2.31008e-12	8.19158e-12	1.62684	1.91817	1.90979	3.04302	4.03652	76770	2010005H15Rik	0.188198	0.23031	0.228976	0.502259	1	76770	2010005H15Rik	0.202098	0.0675278	0.0652273	0.567248
69206	2010016I18Rik	-0.654007	0.154623	0.281932	2.27477	1.19772e-07	4.27453e-07	-0.654043	0.0677157	0.107578	0.542966	0.128677	0.210675	69206	2010016I18Rik	-0.654006	-1.42339	0.154623	0.281933	1.62076	4.39945	1.08525e-05	3.30436e-05	0.966717	2.45798	0.013972	0.0210906	1.50968	4.10444	4.05299e-05	9.1306e-05	3.27852	3.03763	4.16162	3.77678	4.09308	69206	2010016I18Rik	0.5422	0.458824	1	0.765865	0.953602	69206	2010016I18Rik	0.20547	0.160194	0.574737	0.341756
100503082	2010110K18Rik	0.0388386	0.892382	0.939033	-0.449926	0.145888	0.21624	-1.82593	2.55438e-05	6.96674e-05	-0.783763	0.159806	0.252023	100503082	2010110K18Rik	0.0388392	0.135293	0.89238	0.936137	-0.411087	-1.35055	0.176839	0.299372	-2.23702	-5.34973	8.80874e-08	1.95448e-07	-3.02078	-6.505	7.76947e-11	2.53436e-10	4.38215	4.39884	4.1059	3.21015	2.93062	100503082	2010110K18Rik	0.988501	1	0.816241	0.438702	0.361429	100503082	2010110K18Rik	1.78371	1.63023	1.3715	0.14725
72061	2010111I01Rik	0.175749	0.00516337	0.0167179	-0.326991	3.26015e-07	1.1207e-06	-0.639838	1.79419e-21	1.42482e-20	0.566577	3.11014e-17	3.31071e-16	72061	2010111I01Rik	0.175749	2.79666	0.00516335	0.0167179	-0.151242	-2.37003	0.0177865	0.0371412	-0.79108	-11.9649	5.4281e-33	2.63902e-32	-0.224503	-3.52526	0.000423071	0.000864215	10.5908	10.7085	10.4904	10.0829	10.4415	72061	2010111I01Rik	0.921657	1	0.859694	0.648184	0.831078	72061	2010111I01Rik	22.4424	20.2812	12.3862	6.91366
68355	2010204K13Rik	0.311864	0.509066	0.666227	-0.20481	0.670322	0.747511	-1.09363	0.0403706	0.0679314	-0.451247	0.436619	0.561933	68355	2010204K13Rik	0.311865	0.660295	0.509064	0.666227	0.107055	0.222611	0.823838	0.974041	-0.986579	-1.87697	0.060522	0.0831925	-1.43783	-2.7012	0.00690898	0.0121307	3.85311	4.01988	3.89014	3.35026	3.08206	68355	2010204K13Rik	0.890835	1	0.913991	0.628669	0.52202	68355	2010204K13Rik	0.97759	0.716109	0.546089	0.175891
72097	2010300C02Rik	0.533309	0.0493581	0.114504	0.436237	0.099886	0.156079	-1.71189	2.99649e-08	1.0721e-07	-2.59244	3.9643e-07	1.76886e-06	72097	2010300C02Rik	0.533309	1.96549	0.0493579	0.114503	0.969546	3.6121	0.000303723	0.000802407	-0.742347	-2.36218	0.0181679	0.0270107	-3.33478	-6.8354	8.17777e-12	2.81255e-11	4.74144	5.06593	5.35542	4.30055	3.27048	72097	2010300C02Rik	0.65339	0.818187	1	0.481338	0.235706	72097	2010300C02Rik	0.326248	0.490548	0.315891	0.0839403
630836	2010315B03Rik	-1.02451	3.40975e-16	4.91351e-15	0.129354	0.322343	0.421098	0.64328	6.19952e-07	1.97659e-06	0.223631	0.0735352	0.131161	630836	2010315B03Rik	-1.02451	-8.15787	3.40979e-16	4.91357e-15	-0.89516	-7.09838	1.26229e-12	5.98744e-12	-0.251881	-2.03365	0.0419868	0.0592757	-0.0282494	-0.231679	0.816787	0.862576	8.83418	8.17455	8.256	8.65848	8.81783	630836	2010315B03Rik	1	0.633042	0.66981	0.885341	0.988737	630836	2010315B03Rik	10.0945	4.09661	3.15814	4.81266
72093	2010320M18Rik	-0.384176	0.0626425	0.138384	-1.08461	1.21713e-06	3.97011e-06	-0.242121	0.319571	0.412643	1.18177	3.71531e-07	1.66466e-06	72093	2010320M18Rik	-0.384175	-1.86172	0.0626428	0.138385	-1.46879	-6.67467	2.47792e-11	1.10015e-10	-1.71091	-7.51622	5.63813e-14	1.62989e-13	-0.529138	-2.54277	0.0109978	0.0187262	7.04637	6.76703	6.10178	5.96745	6.67942	72093	2010320M18Rik	1	0.823969	0.519576	0.473383	0.775421	72093	2010320M18Rik	9.64427	5.12087	2.63501	1.51875
72275	2200002D01Rik	1.01412	0.00574265	0.0183645	1.50357	5.39813e-07	1.82645e-06	-0.469139	0.0905234	0.139272	-0.450006	0.129061	0.211213	72275	2200002D01Rik	1.01412	2.76213	0.00574262	0.0183644	2.51769	7.49422	6.66952e-14	3.33998e-13	2.04856	5.87379	4.25941e-09	1.00398e-08	1.59855	4.54043	5.61388e-06	1.36207e-05	3.39825	3.8485	4.7354	4.46364	4.18201	72275	2200002D01Rik	0.3958	0.540775	1	0.828306	0.681414	72275	2200002D01Rik	0.350781	0.351624	1.56237	1.24712
70057	2210008F06Rik	0.0833799	0.861684	0.919664	-0.802653	0.143984	0.21377	-1.14578	0.122158	0.18144	-1.10871	0.256072	0.370643	70057	2210008F06Rik	0.0833809	0.174233	0.861682	0.917047	-0.719272	-1.33022	0.183446	0.308898	-1.86505	-2.69984	0.00693726	0.0108613	-2.97376	-3.56181	0.000368308	0.000757049	2.41086	2.44626	2.07918	1.71518	1.50229	70057	2210008F06Rik	0.975765	1	0.775351	0.602454	0.519801	70057	2210008F06Rik	0.229479	0.262892	0.0634839	0
70134	2210011C24Rik	-0.480302	0.043358	0.103258	-1.84443	8.31636e-10	3.46887e-09	-2.56106	1.15218e-05	3.25967e-05	-0.027568	0.969286	0.981785	70134	2210011C24Rik	-0.480302	-2.02024	0.0433581	0.103259	-2.32473	-7.91388	2.49498e-15	1.32891e-14	-4.8858	-8.81421	1.20537e-18	4.06587e-18	-4.91336	-9.66783	4.13053e-22	2.10689e-21	5.4668	5.11803	3.94239	3.00093	2.90224	70134	2210011C24Rik	1	0.785251	0.347622	0.181008	0.16904	70134	2210011C24Rik	3.45021	1.74708	0.58548	0.0665571
70153	2210016F16Rik	0.0304795	0.729966	0.837215	-0.36739	4.03311e-05	0.000111926	-0.264092	0.00381305	0.0077365	0.733537	4.96645e-16	4.82105e-15	70153	2210016F16Rik	0.0304797	0.345172	0.729965	0.837214	-0.33691	-3.77814	0.000158005	0.000428971	-0.601003	-6.66886	2.57798e-11	6.71353e-11	0.132534	1.50101	0.133353	0.185698	10.5537	10.5719	10.3332	10.1654	10.6418	70153	2210016F16Rik	0.940754	0.952694	0.80741	0.71873	1	70153	2210016F16Rik	24.1372	19.3814	14.5717	9.96469
72357	2210016L21Rik	-0.177407	0.0675349	0.14703	0.166618	0.0892501	0.141269	-0.520282	2.02946e-07	6.77322e-07	0.240033	0.0168652	0.0360409	72357	2210016L21Rik	-0.177407	-1.8281	0.0675351	0.14703	-0.010789	-0.111032	0.911591	0.975197	-0.531071	-5.35687	8.46775e-08	1.88064e-07	-0.291038	-2.9847	0.00283855	0.00524771	9.80095	9.6775	9.79247	9.45763	9.61042	72357	2210016L21Rik	1	0.917992	0.994137	0.788225	0.876286	72357	2210016L21Rik	33.9794	19.9882	24.5255	14.0173
73652	2210408F21Rik	0.19313	0.189024	0.328598	-0.760636	2.28585e-06	7.27173e-06	-0.0325003	0.853819	0.894808	0.973145	3.04402e-09	1.69804e-08	73652	2210408F21Rik	0.19313	1.31347	0.189024	0.328597	-0.567507	-3.55032	0.000384757	0.00100499	-0.600007	-3.66247	0.000249796	0.000444232	0.373138	2.55222	0.0107038	0.0182502	6.67602	6.79684	6.32059	6.29552	6.91478	73652	2210408F21Rik	0.847477	0.921508	0.662417	0.651005	1	73652	2210408F21Rik	4.64243	3.49019	2.24752	1.46911
72371	2210408I21Rik	0.782393	1.28168e-05	7.02928e-05	-0.430209	0.018712	0.0348238	-0.647686	0.00235404	0.00494235	-0.00302491	0.98918	0.994504	72371	2210408I21Rik	0.782393	4.36321	1.28167e-05	7.02922e-05	0.352184	1.8576	0.0632255	0.119184	-0.295501	-1.4083	0.159043	0.202254	-0.298526	-1.48585	0.137318	0.190671	5.45266	5.94051	5.67012	5.28123	5.27756	72371	2210408I21Rik	0.713088	1	0.829097	0.633196	0.631584	72371	2210408I21Rik	0.303093	0.424084	0.330155	0.194957
69478	2300009A05Rik	-0.042	0.766156	0.861546	-0.839982	2.83796e-08	1.06694e-07	-0.0405128	0.802153	0.853021	0.0075213	0.962666	0.977884	69478	2300009A05Rik	-0.0419998	-0.297405	0.766157	0.861547	-0.881982	-5.89387	3.77248e-09	1.4735e-08	-0.922495	-6.05749	1.38259e-09	3.33419e-09	-0.914974	-6.15877	7.33123e-10	2.27073e-09	7.59633	7.57064	7.03559	7.01091	7.01539	69478	2300009A05Rik	1	0.98235	0.677956	0.666454	0.668526	69478	2300009A05Rik	14.3348	11.865	6.62308	4.28503
76432	2310001H17Rik	0.200284	0.326796	0.492434	0.353653	0.0833384	0.133233	0.14149	0.487819	0.58209	-0.734169	0.000359571	0.00107703	76432	2310001H17Rik	0.200284	0.980591	0.326795	0.492435	0.553938	2.7181	0.00656572	0.0146787	0.695428	3.40965	0.000650463	0.00111961	-0.0387409	-0.188414	0.850552	0.887791	7.69535	7.81189	8.03808	8.13564	7.66503	76432	2310001H17Rik	0.736986	0.79899	0.934612	1	0.721657	76432	2310001H17Rik	11.4247	9.08754	14.5553	10.7755
66364	2310009A05Rik	-0.0513074	0.736442	0.841763	-0.402287	0.0106733	0.0209069	-0.129254	0.429111	0.525787	0.242688	0.13395	0.217841	66364	2310009A05Rik	-0.0513071	-0.336567	0.736443	0.841764	-0.453594	-2.90645	0.00365555	0.00846733	-0.582848	-3.67629	0.000236653	0.000421605	-0.34016	-2.20226	0.0276473	0.0442841	7.83055	7.79438	7.53209	7.45628	7.60688	66364	2310009A05Rik	1	0.97524	0.813118	0.771492	0.856385	66364	2310009A05Rik	19.6643	16.5954	12.81	8.86075
69549	2310009B15Rik	0.0477949	0.766482	0.861723	-0.183685	0.269351	0.363192	-0.00918985	0.957316	0.969234	-0.12829	0.455051	0.579895	69549	2310009B15Rik	0.0477952	0.296981	0.766481	0.861722	-0.13589	-0.826273	0.408649	0.609962	-0.14508	-0.871215	0.383637	0.446308	-0.27337	-1.66178	0.0965574	0.139074	7.02775	7.05021	6.93163	6.93829	6.85611	69549	2310009B15Rik	0.98455	1	0.921094	0.925354	0.874119	69549	2310009B15Rik	8.78329	7.55555	7.1172	4.9539
78329	2310010J17Rik	0.503736	0.0371023	0.0912984	0.186235	0.436525	0.534996	-1.28266	3.52708e-06	1.05029e-05	0.134009	0.650278	0.75285	78329	2310010J17Rik	0.503737	2.08464	0.0371021	0.091298	0.689971	2.84841	0.00439376	0.0100645	-0.592685	-2.12756	0.0333737	0.0477832	-0.458676	-1.73897	0.0820402	0.119844	5.02495	5.33757	5.45958	4.70027	4.76944	78329	2310010J17Rik	0.739882	0.918904	1	0.590777	0.619792	78329	2310010J17Rik	2.3801	2.45209	3.32877	1.05155
66374	2310011J03Rik	-0.168714	0.244579	0.398428	0.180216	0.214861	0.299961	0.25127	0.0837339	0.12996	0.299497	0.0387674	0.0756002	66374	2310011J03Rik	-0.168713	-1.16361	0.24458	0.398429	0.0115029	0.0793182	0.93678	0.986533	0.262773	1.81244	0.069918	0.0951801	0.56227	3.88712	0.00010144	0.000220579	10.9746	10.8614	10.9771	11.1466	11.3425	66374	2310011J03Rik	0.774881	0.716404	0.776244	0.87301	1	66374	2310011J03Rik	47.7901	32.302	41.3737	36.0467
69548	2310015A10Rik	-0.67763	6.80933e-09	5.57187e-08	-1.32356	1.89916e-20	1.39818e-19	-0.3787	0.0277526	0.0482024	0.807047	8.96109e-07	3.8321e-06	69548	2310015A10Rik	-0.67763	-5.79556	6.80937e-09	5.5719e-08	-2.00119	-14.5163	9.55919e-48	1.29231e-46	-2.37989	-15.7316	9.17972e-56	6.78682e-55	-1.57284	-12.2916	1.00446e-34	7.05722e-34	7.69856	7.23027	6.38804	6.17539	6.64509	69548	2310015A10Rik	1	0.722821	0.403174	0.347921	0.48181	69548	2310015A10Rik	2.98796	1.58956	0.490477	0.357169
66367	2310022A10Rik	0.129531	0.0559595	0.126578	-1.97374	2.74799e-163	2.29428e-161	0.881969	3.53019e-32	4.31205e-31	0.305459	1.85001e-05	6.71209e-05	66367	2310022A10Rik	0.129531	1.91135	0.0559593	0.126578	-1.84421	-25.4995	1.99568e-143	9.06324e-142	-0.962241	-13.7213	7.5724e-43	4.45828e-42	-0.656781	-9.53934	1.43741e-21	7.20679e-21	11.0678	11.1564	9.89013	10.4288	10.6268	66367	2310022A10Rik	0.940431	1	0.415736	0.603899	0.692728	66367	2310022A10Rik	42.2376	36.3638	7.07828	11.2522
69551	2310022B05Rik	-0.0915462	0.401113	0.568229	0.168938	0.12707	0.192088	-0.0769638	0.492511	0.586262	0.397216	0.000325177	0.000982069	69551	2310022B05Rik	-0.0915461	-0.839633	0.401114	0.56823	0.077392	0.708337	0.478736	0.691929	0.000428213	0.00387633	0.996907	0.997901	0.397644	3.696	0.000219019	0.000460194	8.67224	8.6117	8.7217	8.66673	8.92977	69551	2310022B05Rik	0.836519	0.802145	0.8657	0.833331	1	69551	2310022B05Rik	5.62525	4.56061	3.67624	3.53213
67862	2310033P09Rik	-0.013688	0.906016	0.948429	-0.46445	8.40275e-05	0.000224073	-0.565187	3.9591e-06	1.1756e-05	0.646104	1.16798e-07	5.55625e-07	67862	2310033P09Rik	-0.0136879	-0.118063	0.906017	0.945522	-0.478138	-4.06732	4.75561e-05	0.000136446	-1.04332	-8.66394	4.55736e-18	1.50908e-17	-0.39722	-3.39595	0.000683898	0.00136448	9.49793	9.48696	9.18043	8.8267	9.23602	67862	2310033P09Rik	1	0.992423	0.802454	0.627967	0.83398	67862	2310033P09Rik	26.355	20.3372	15.6823	9.04919
75579	2310034G01Rik	-0.721299	0.0810658	0.169524	2.68241	6.02806e-12	2.90412e-11	0.75991	0.0148042	0.0271806	-2.19849	7.35268e-11	4.74624e-10	75579	2310034G01Rik	-0.721298	-1.74453	0.081066	0.169525	1.96111	5.66445	1.47497e-08	5.54607e-08	2.72102	7.98442	1.41183e-15	4.29049e-15	0.522525	1.41398	0.157369	0.215781	4.09451	3.73732	5.24498	5.76933	4.3784	75579	2310034G01Rik	0.313206	0.244515	0.695272	1	0.381321	75579	2310034G01Rik	0.722218	0.180988	2.14157	2.95621
67101	2310039H08Rik	-0.22107	0.17711	0.312842	-0.192518	0.262048	0.355024	-0.397789	0.0298176	0.0514926	0.355267	0.0511909	0.0962965	67101	2310039H08Rik	-0.221069	-1.34971	0.17711	0.312843	-0.413587	-2.46322	0.0137697	0.029318	-0.811376	-4.61604	3.91137e-06	7.91184e-06	-0.456109	-2.73219	0.00629141	0.0111021	6.98529	6.82637	6.71269	6.46894	6.69077	67101	2310039H08Rik	1	0.895696	0.827824	0.699136	0.81534	67101	2310039H08Rik	7.45435	4.98151	4.72269	2.97053
381792	2310040G24Rik	-0.21902	0.187699	0.326851	-0.660792	0.000297262	0.000742729	-1.61726	4.209e-11	1.86676e-10	0.521715	0.0464406	0.0885679	381792	2310040G24Rik	-0.21902	-1.31741	0.1877	0.32685	-0.879812	-4.93253	8.11695e-07	2.70012e-06	-2.49707	-10.7071	9.43168e-27	3.96224e-26	-1.97536	-9.83135	8.25027e-23	4.29756e-22	6.47172	6.3117	5.88065	4.96345	5.22809	381792	2310040G24Rik	1	0.895012	0.66385	0.351532	0.422307	381792	2310040G24Rik	6.05824	3.91051	2.53301	0.4294
75589	2310043L19Rik	5.02774	6.00953e-06	3.46198e-05	-0.496326	0.366121	0.465837	-0.29154	0.638981	0.718802	1.1755	0.0411335	0.0795991	75589	2310043L19Rik	5.02774	4.52606	6.00933e-06	3.46186e-05	4.53141	4.01062	6.05605e-05	0.000172214	4.23987	3.69209	0.000222423	0.000397223	5.41537	4.89973	9.59708e-07	2.45945e-06	1.35301	2.46598	2.23917	2.13806	2.68922	75589	2310043L19Rik	0.396057	0.856634	0.732015	0.68247	1	75589	2310043L19Rik	0	0.459731	0.197364	0.143031
69657	2310047D07Rik	-0.110874	0.885986	0.934845	-0.820485	0.357277	0.45644	-1.01964	0.370721	0.466616	1.23249	0.266862	0.383182	69657	2310047D07Rik	-0.110873	-0.143384	0.885987	0.931958	-0.931358	-1.07152	0.283934	0.451338	-1.951	-1.85851	0.0630965	0.0864577	-0.718507	-0.864875	0.387107	0.473275	1.31364	1.29174	1.06718	0.878663	1.10889	69657	2310047D07Rik	1	0.98493	0.842959	0.739704	0.867687	69657	2310047D07Rik	0.0977177	0.195905	0.0473077	0.0457123
68277	2310057M21Rik	0.37303	0.000803214	0.0032049	0.0617364	0.581943	0.67104	-0.192733	0.0980644	0.149347	-0.177509	0.133582	0.217382	68277	2310057M21Rik	0.37303	3.35169	0.00080321	0.00320489	0.434767	3.86566	0.00011079	0.000306957	0.242034	2.09196	0.0364424	0.051895	0.0645251	0.564199	0.572619	0.654183	7.48362	7.72177	7.76263	7.63983	7.5268	68277	2310057M21Rik	0.824154	0.972072	1	0.918403	0.849192	68277	2310057M21Rik	3.83968	3.31746	3.71778	2.40495
75694	2310058D17Rik	-0.24394	0.281461	0.441517	-0.357245	0.158362	0.232022	1.10306	7.81909e-06	2.25273e-05	-0.0485284	0.824243	0.883847	75694	2310058D17Rik	-0.243939	-1.07704	0.281461	0.441518	-0.601185	-2.47386	0.0133662	0.0285262	0.501876	2.28944	0.0220537	0.0324279	0.453348	2.11565	0.034375	0.0541948	5.1948	5.03801	4.85161	5.51079	5.48018	75694	2310058D17Rik	0.803301	0.720576	0.633239	1	0.97901	75694	2310058D17Rik	0.577819	0.412128	0.268979	0.415852
69662	2310061I04Rik	-0.702696	3.76477e-12	4.11039e-11	0.168495	0.110982	0.170866	0.539303	2.27127e-07	7.54493e-07	0.0670044	0.505791	0.628974	69662	2310061I04Rik	-0.702696	-6.94574	3.7648e-12	4.11042e-11	-0.534201	-5.26278	1.41892e-07	4.98936e-07	0.0051012	0.0512263	0.959145	0.967452	0.0721056	0.736468	0.461446	0.547715	8.76309	8.30759	8.41196	8.76586	8.8103	69662	2310061I04Rik	0.967806	0.705776	0.758727	0.969664	1	69662	2310061I04Rik	18.3009	8.13732	9.05439	11.0302
70281	2310068J16Rik	-1.38823	0.00509584	0.0165167	-0.146613	0.806829	0.857529	0.822027	0.158543	0.226865	-0.609921	0.271453	0.388066	70281	2310068J16Rik	-1.38823	-2.80091	0.00509586	0.0165168	-1.53484	-2.90369	0.00368791	0.00853431	-0.712812	-1.49907	0.133856	0.172711	-1.32273	-2.66043	0.00780408	0.0136036	2.96481	2.29444	2.26228	2.56639	2.33495	70281	2310068J16Rik	1	0.628347	0.614493	0.758688	0.646238	70281	2310068J16Rik	0.475949	0.190837	0.12289	0.148432
668661	2410002F23Rik	-0.0619925	0.431156	0.596553	-0.818764	4.14312e-21	3.1507e-20	-0.669335	4.7202e-11	2.08289e-10	0.68165	1.28809e-11	8.95637e-11	668661	2410002F23Rik	-0.0619924	-0.787215	0.431156	0.596554	-0.880756	-10.3105	6.31614e-25	4.86607e-24	-1.55009	-16.3288	6.15645e-60	4.853e-59	-0.868441	-10.3168	5.91674e-25	3.26612e-24	8.71225	8.66839	8.12872	7.71881	8.13565	668661	2410002F23Rik	1	0.970062	0.667329	0.502279	0.670546	668661	2410002F23Rik	12.1136	10.3978	4.22246	2.46819
69729	2410003L11Rik	0.357066	0.708711	0.821618	-0.50136	0.619921	0.703708	-0.204588	0.853598	0.894742	1.33517	0.196773	0.298956	69729	2410003L11Rik	0.357066	0.373588	0.708711	0.821618	-0.144294	-0.142374	0.886784	0.974041	-0.348882	-0.329232	0.741981	0.782896	0.986292	1.06046	0.288935	0.368281	0.894502	0.975572	0.85798	0.769086	1.15243	69729	2410003L11Rik	0.836286	0.884625	0.815381	0.766657	1	69729	2410003L11Rik	0.290598	0.407815	0.112549	0
66421	2410004B18Rik	0.197531	0.0543327	0.123834	0.152197	0.140343	0.209274	0.2642	0.0104757	0.0197319	-0.241898	0.0185846	0.039391	66421	2410004B18Rik	0.197531	1.92418	0.0543325	0.123833	0.349728	3.3996	0.000674834	0.00171658	0.613928	5.98055	2.22386e-09	5.31036e-09	0.37203	3.63208	0.000281144	0.000583427	9.06617	9.19223	9.28951	9.46838	9.30632	66421	2410004B18Rik	0.756697	0.82579	0.883392	1	0.893743	66421	2410004B18Rik	22.29	20.8077	21.6884	21.1617
73667	2410004P03Rik	-0.585612	0.26515	0.42264	-1.30431	0.0474528	0.0806518	-3.6852	0.00189118	0.00403425	1.65648	0.231575	0.341798	73667	2410004P03Rik	-0.58561	-1.1143	0.265151	0.422641	-1.88992	-2.98157	0.00286771	0.00674159	-5.57512	-4.98679	6.13921e-07	1.30454e-06	-3.91865	-4.10411	4.05873e-05	9.14229e-05	2.58304	2.22166	1.69821	1.14953	1.26301	73667	2410004P03Rik	1	0.77842	0.541551	0.37023	0.400527	73667	2410004P03Rik	0.276957	0.158642	0.0574639	0
69221	2410006H16Rik	-0.160134	0.254694	0.410198	-1.9055	1.69607e-38	2.22961e-37	-0.887068	2.96808e-08	1.06217e-07	0.869313	5.04615e-08	2.48863e-07	69221	2410006H16Rik	-0.160134	-1.13902	0.254695	0.4102	-2.06563	-14.1113	3.23768e-45	4.18327e-44	-2.9527	-19.1356	1.27513e-81	1.31632e-80	-2.08338	-14.2864	2.66189e-46	2.40462e-45	9.67008	9.54342	8.28418	7.77438	8.2722	69221	2410006H16Rik	1	0.915952	0.382651	0.268743	0.379488	69221	2410006H16Rik	93.8225	61.4096	16.9585	8.37377
224904	2410015M20Rik	0.254437	0.125924	0.240273	-0.303352	0.0687482	0.111983	-0.624537	0.000200596	0.000491885	0.149605	0.37403	0.498598	224904	2410015M20Rik	0.254437	1.53038	0.125924	0.240271	-0.0489146	-0.29355	0.769102	0.964684	-0.673452	-4.01927	5.83782e-05	0.000108929	-0.523847	-3.13749	0.00170402	0.00323722	10.4384	10.6015	10.3972	10.0034	10.09	224904	2410015M20Rik	0.89306	1	0.867944	0.660613	0.701475	224904	2410015M20Rik	71.3269	66.7286	63.2236	28.9148
100503842	2410022M11Rik	-1.04757	8.50341e-05	0.000410641	-0.655244	0.0271039	0.0486753	-0.869032	0.0123016	0.0229074	0.858104	0.0127579	0.0280461	100503842	2410022M11Rik	-1.04757	-3.92975	8.50349e-05	0.000410644	-1.70282	-5.99051	2.09186e-09	8.32391e-09	-2.57185	-7.987	1.38264e-15	4.20336e-15	-1.71375	-6.09561	1.0902e-09	3.34772e-09	5.9519	5.22061	4.83724	4.40211	4.84843	100503842	2410022M11Rik	1	0.602367	0.4618	0.34156	0.465397	100503842	2410022M11Rik	3.07783	0.902282	1.01211	0.407492
76792	2410131K14Rik	-0.709634	7.49585e-11	7.36507e-10	0.211711	0.0667951	0.10913	0.839456	4.08463e-14	2.18589e-13	0.451464	1.11741e-05	4.18088e-05	76792	2410131K14Rik	-0.709634	-6.51038	7.4959e-11	7.36512e-10	-0.497923	-4.56324	5.03693e-06	1.57596e-05	0.341533	3.27469	0.00105778	0.00179324	0.792997	7.87804	3.32565e-15	1.32719e-14	8.13708	7.68644	7.82067	8.36331	8.67053	76792	2410131K14Rik	0.690902	0.505545	0.554839	0.808197	1	76792	2410131K14Rik	5.1289	2.43039	2.41209	3.77655
72326	2500004C02Rik	-0.928727	4.57002e-05	0.000230275	0.387323	0.117344	0.17945	0.184341	0.448291	0.544495	-0.0824049	0.728629	0.815992	72326	2500004C02Rik	-0.928726	-4.07659	4.57005e-05	0.000230276	-0.541403	-2.42555	0.0152854	0.032313	-0.357062	-1.59955	0.109699	0.143851	-0.439466	-2.02398	0.0429721	0.0664122	5.37168	4.80635	5.04032	5.15675	5.10663	72326	2500004C02Rik	1	0.675802	0.794788	0.861587	0.832168	72326	2500004C02Rik	1.2556	0.507206	0.580653	0.543538
72307	2510002D24Rik	-0.507104	0.000406605	0.00172962	-1.1215	2.79147e-12	1.36965e-11	-1.23494	1.01167e-09	4.08207e-09	0.749703	0.000284787	0.000867096	72307	2510002D24Rik	-0.507104	-3.53576	0.000406607	0.00172963	-1.6286	-10.381	3.02432e-25	2.3593e-24	-2.86354	-15.1534	7.18943e-52	4.97228e-51	-2.11384	-13.0025	1.18461e-38	9.08057e-38	7.59422	7.22997	6.49693	5.80321	6.20649	72307	2510002D24Rik	1	0.776877	0.467396	0.28897	0.382166	72307	2510002D24Rik	9.46973	5.44081	2.12455	0.783342
72190	2510009E07Rik	0.840157	2.34761e-08	1.8098e-07	-0.0954088	0.525634	0.620249	-1.32299	3.37065e-18	2.24844e-17	0.969903	1.87607e-10	1.1701e-09	72190	2510009E07Rik	0.840157	5.58421	2.34758e-08	1.80978e-07	0.744749	4.94438	7.63856e-07	2.54781e-06	-0.57824	-3.7986	0.000145515	0.000263671	0.391663	2.5979	0.00937964	0.0161464	10.4248	10.9729	10.9061	10.062	10.6747	72190	2510009E07Rik	0.683931	1	0.954744	0.531847	0.813253	72190	2510009E07Rik	13.8792	19.6156	10.9576	5.33591
77034	2510039O18Rik	-0.153357	0.0236065	0.0622169	0.662206	1.54209e-22	1.24574e-21	0.790677	2.31907e-32	2.85716e-31	-0.28718	1.44694e-05	5.33948e-05	77034	2510039O18Rik	-0.153357	-2.26347	0.0236066	0.0622171	0.508849	7.5689	3.76384e-14	1.90457e-13	1.29953	19.4775	1.70302e-84	1.82606e-83	1.01235	15.1785	4.90611e-52	4.96039e-51	11.1622	11.0677	11.4862	12.02	11.8242	77034	2510039O18Rik	0.551785	0.516799	0.690762	1	0.873092	77034	2510039O18Rik	37.588	26.2155	31.426	49.339
70319	2600006K01Rik	-0.574768	0.312871	0.477895	0.0627156	0.919899	0.941936	-0.602166	0.390418	0.48761	0.203274	0.777061	0.852042	70319	2600006K01Rik	-0.574767	-1.00921	0.312872	0.477898	-0.512052	-0.881368	0.378119	0.572442	-1.11422	-1.70506	0.0881834	0.117644	-0.910944	-1.51486	0.129809	0.181439	2.31835	2.0669	2.09717	1.8799	1.93127	70319	2600006K01Rik	1	0.840051	0.857862	0.737926	0.764677	70319	2600006K01Rik	0.449209	0.163741	0.158163	0.152829
66520	2610001J05Rik	0.513346	2.08911e-10	1.97904e-09	0.137297	0.0889964	0.14092	-0.222675	0.00598661	0.0117619	-0.661968	4.65159e-16	4.52687e-15	66520	2610001J05Rik	0.513346	6.35464	2.08909e-10	1.97902e-09	0.650642	8.04987	8.28819e-16	4.51674e-15	0.427967	5.27895	1.29929e-07	2.85527e-07	-0.234001	-2.87712	0.00401318	0.00727698	11.6515	11.9869	12.0791	11.9306	11.5023	66520	2610001J05Rik	0.743508	0.938071	1	0.902205	0.670462	66520	2610001J05Rik	74.6895	85.0729	87.4467	57.8083
67028	2610002M06Rik	0.0762311	0.309061	0.473372	0.48832	6.96141e-11	3.12368e-10	0.865305	1.00531e-33	1.29658e-32	-0.773322	6.38707e-28	1.28564e-26	67028	2610002M06Rik	0.0762312	1.0172	0.30906	0.473371	0.564551	7.65176	1.98254e-14	1.01249e-13	1.42986	19.9821	7.88143e-89	8.95394e-88	0.656535	9.00331	2.19004e-19	1.02202e-18	8.9945	9.04099	9.35533	9.93975	9.41487	67028	2610002M06Rik	0.519341	0.53635	0.666917	1	0.695017	67028	2610002M06Rik	3.63486	3.21026	3.58431	5.49136
72128	2610008E11Rik	-1.60038	5.39398e-39	1.81993e-37	-0.42935	0.00342616	0.00734459	0.262398	0.090037	0.138633	0.877349	2.88258e-10	1.76551e-09	72128	2610008E11Rik	-1.60038	-13.0625	5.39401e-39	1.81994e-37	-2.02973	-15.1875	4.27953e-52	6.33818e-51	-1.76733	-13.3795	7.97202e-41	4.50542e-40	-0.88998	-7.72625	1.10762e-14	4.34232e-14	7.80342	6.73149	6.47601	6.63071	7.18939	72128	2610008E11Rik	1	0.475681	0.398483	0.443587	0.653369	72128	2610008E11Rik	3.52412	1.01172	0.472339	0.519362
69918	2610020C07Rik	-0.162556	0.557867	0.705138	-0.554698	0.0722377	0.117084	0.0796521	0.810722	0.859978	-0.382836	0.257768	0.372728	69918	2610020C07Rik	-0.162556	-0.586011	0.557868	0.705136	-0.717254	-2.39098	0.0168035	0.0352698	-0.637602	-2.09806	0.0358994	0.0511444	-1.02044	-3.33157	0.000863577	0.00170252	4.67573	4.53412	4.25044	4.30412	4.08783	69918	2610020C07Rik	1	0.906507	0.744686	0.772917	0.66531	69918	2610020C07Rik	0.824889	0.57881	0.255584	0.246965
668572	2610021A01Rik	-0.999001	1.28568e-11	1.33882e-10	0.442182	0.00476381	0.00995775	0.0018644	0.990476	0.993642	0.39475	0.00892567	0.0203397	668572	2610021A01Rik	-0.999001	-6.77024	1.28569e-11	1.33883e-10	-0.556819	-3.84879	0.000118702	0.000327507	-0.554954	-3.77365	0.000160878	0.000290375	-0.160204	-1.15247	0.249128	0.323812	7.1621	6.52875	6.8037	6.80584	7.05604	668572	2610021A01Rik	1	0.644676	0.780027	0.781184	0.92912	668572	2610021A01Rik	2.27176	0.855117	0.870876	0.824155
72386	2610035D17Rik	-0.166915	0.547521	0.69682	-2.73568	1.5064e-19	1.06555e-18	-3.85638	7.2594e-11	3.16334e-10	1.87366	0.0027452	0.00700033	72386	2610035D17Rik	-0.166914	-0.601475	0.547524	0.696823	-2.90259	-9.62718	6.1389e-22	4.27033e-21	-6.75897	-11.662	1.99335e-31	9.3819e-31	-4.88531	-13.4422	3.42235e-41	2.77876e-40	7.31351	7.18558	5.3107	3.88824	4.32724	72386	2610035D17Rik	1	0.91514	0.249513	0.0930873	0.126195	72386	2610035D17Rik	6.77509	4.22531	0.577727	0.0900393
72139	2610044O15Rik8	-0.698851	2.40548e-05	0.000127016	-0.448524	0.0122376	0.023679	0.535613	0.0032506	0.00665989	0.468338	0.00633895	0.0149961	72139	2610044O15Rik8	-0.698851	-4.22349	2.4055e-05	0.000127016	-1.14737	-6.63531	3.2382e-11	1.4278e-10	-0.611762	-3.62692	0.000286827	0.000507505	-0.143423	-0.885799	0.375726	0.461486	7.35212	6.88753	6.60207	6.95052	7.25295	72139	2610044O15Rik8	1	0.724679	0.594584	0.757019	0.933574	72139	2610044O15Rik8	6.33094	2.85819	2.50345	2.66771
72481	2610203C22Rik	0.252126	0.148012	0.272702	-0.102153	0.570964	0.661388	-1.74744	5.92196e-13	2.95364e-12	0.50108	0.0563464	0.104683	72481	2610203C22Rik	0.252126	1.44659	0.148011	0.272701	0.149974	0.836309	0.402981	0.603089	-1.59747	-6.70563	2.00542e-11	5.24969e-11	-1.09639	-5.33263	9.68016e-08	2.66018e-07	5.6881	5.85858	5.78755	4.76172	5.03332	72481	2610203C22Rik	0.888544	1	0.951955	0.467531	0.564379	72481	2610203C22Rik	1.59862	1.71692	1.24382	0.267083
72495	2610206C17Rik	0.107576	0.516406	0.672473	0.00883459	0.958689	0.969311	-0.246645	0.168679	0.239492	-0.155455	0.394662	0.519904	72495	2610206C17Rik	0.107576	0.648897	0.516405	0.672472	0.116411	0.691486	0.48926	0.704021	-0.130234	-0.745688	0.455856	0.517405	-0.285689	-1.66078	0.0967571	0.139313	6.36938	6.43823	6.41923	6.28392	6.1914	72495	2610206C17Rik	0.953395	1	0.986913	0.898562	0.842743	72495	2610206C17Rik	2.40305	1.80661	1.52443	1.29858
67157	2610301B20Rik	-0.678049	1.55619e-07	1.1036e-06	-1.28273	9.52238e-15	5.35903e-14	0.0146263	0.939795	0.956306	1.06202	9.26282e-10	5.42385e-09	67157	2610301B20Rik	-0.678049	-5.24578	1.5562e-07	1.10361e-06	-1.96078	-12.3674	3.92149e-35	4.05132e-34	-1.94615	-11.893	1.28625e-32	6.21026e-32	-0.884131	-6.63864	3.16591e-11	1.05637e-10	7.04285	6.5832	5.7991	5.80478	6.43995	67157	2610301B20Rik	1	0.72716	0.422273	0.42394	0.65843	67157	2610301B20Rik	4.0267	2.13592	0.633566	0.643594
67170	2610306M01Rik	-0.725775	0.000198286	0.000894914	-0.812582	0.000769573	0.00182026	0.571539	0.0257593	0.0450394	0.814297	0.000213367	0.000663087	67170	2610306M01Rik	-0.725775	-3.72119	0.000198287	0.000894919	-1.53836	-6.76805	1.30528e-11	5.88472e-11	-0.966818	-4.53806	5.67749e-06	1.13543e-05	-0.15252	-0.823096	0.410453	0.497089	5.70003	5.24124	4.77296	5.10343	5.60244	67170	2610306M01Rik	1	0.727596	0.525924	0.661311	0.934589	67170	2610306M01Rik	2.27038	1.13792	0.899304	0.708054
70458	2610318N02Rik	0.115174	0.485078	0.645562	-0.72018	6.3361e-05	0.000171883	-1.62251	4.00073e-11	1.77589e-10	0.493895	0.0611744	0.112157	70458	2610318N02Rik	0.115175	0.69816	0.485077	0.645561	-0.605006	-3.39503	0.000686219	0.00174375	-2.22752	-9.48292	2.47257e-21	9.03422e-21	-1.73362	-8.55884	1.14008e-17	5.00917e-17	6.21041	6.28178	5.80832	4.88707	5.14606	70458	2610318N02Rik	0.951738	1	0.720236	0.380321	0.45511	70458	2610318N02Rik	3.93341	2.28122	1.60502	0.394295
72503	2610507B11Rik	-0.451852	7.0537e-05	0.000345314	0.0637092	0.575711	0.665221	-0.535944	2.61934e-06	7.89727e-06	-0.0809077	0.47859	0.602585	72503	2610507B11Rik	-0.451852	-3.97446	7.05377e-05	0.000345317	-0.388143	-3.41313	0.000642209	0.00163826	-0.924087	-8.11186	4.98507e-16	1.53702e-15	-1.00499	-8.82806	1.06506e-18	4.84251e-18	13.1828	12.8804	12.9214	12.5825	12.5299	72503	2610507B11Rik	1	0.810917	0.834268	0.659584	0.635972	72503	2610507B11Rik	76.9974	45.2642	30.1691	19.4136
72203	2610507I01Rik	-1.38434	8.64594e-16	1.21503e-14	-2.0789	1.77946e-22	1.4338e-21	0.457877	0.0529267	0.086481	2.69115	1.78649e-40	6.36404e-39	72203	2610507I01Rik	-1.38434	-8.0447	8.64597e-16	1.21504e-14	-3.46324	-16.6908	1.52884e-62	2.69942e-61	-3.00536	-15.0002	7.32e-51	4.98747e-50	-0.31421	-1.8806	0.0600264	0.0899712	8.03779	7.0859	5.88194	6.10678	7.80305	72203	2610507I01Rik	1	0.516955	0.2244	0.262245	0.84984	72203	2610507I01Rik	7.18731	1.76739	0.320096	0.320757
330173	2610524H06Rik	-0.185691	0.231226	0.382291	-0.519313	0.0011167	0.00258483	-0.580915	0.000508155	0.00118076	0.377633	0.0241265	0.04968	330173	2610524H06Rik	-0.18569	-1.1972	0.231227	0.382292	-0.705004	-4.46056	8.17444e-06	2.51519e-05	-1.28592	-7.88515	3.14148e-15	9.45563e-15	-0.908285	-5.73288	9.87382e-09	2.88037e-08	8.44925	8.32058	7.97316	7.61699	7.85123	330173	2610524H06Rik	1	0.914672	0.718921	0.561649	0.660657	330173	2610524H06Rik	18.1798	11.4321	9.07467	4.22584
70045	2610528A11Rik	-0.255271	0.542483	0.693347	-0.565733	0.21406	0.299056	-0.734437	0.16129	0.230293	-0.662648	0.260125	0.375445	70045	2610528A11Rik	-0.25527	-0.609059	0.542485	0.693349	-0.821003	-1.84776	0.0646364	0.121532	-1.55544	-3.15349	0.0016133	0.00268962	-2.21809	-4.27703	1.89402e-05	4.39587e-05	3.86113	3.68846	3.36912	3.0037	2.74886	70045	2610528A11Rik	1	0.887197	0.711035	0.551934	0.462565	70045	2610528A11Rik	1.31738	0.848921	0.592222	0.0440192
72588	2700012I20Rik	-0.665135	0.0580676	0.13025	-0.332546	0.414625	0.513529	-0.0480859	0.914004	0.937757	0.459677	0.275209	0.392293	72588	2700012I20Rik	-0.665134	-1.89519	0.0580678	0.130251	-0.997681	-2.62822	0.00858337	0.0188665	-1.04577	-2.65334	0.00796985	0.0123959	-0.58609	-1.66872	0.0951736	0.137286	3.81066	3.43188	3.26256	3.2548	3.47687	72588	2700012I20Rik	1	0.769083	0.683916	0.680251	0.793446	72588	2700012I20Rik	0.921985	0.389137	0.46985	0.272403
67194	2700038G22Rik	0.0522402	0.810073	0.888738	-0.649471	0.00593701	0.0121925	-0.374017	0.157519	0.225626	0.154457	0.561889	0.676333	67194	2700038G22Rik	0.0522406	0.240333	0.810072	0.888736	-0.59723	-2.5635	0.0103622	0.0224557	-0.971248	-3.91457	9.05665e-05	0.000166725	-0.816791	-3.47714	0.000506795	0.00102556	5.60042	5.63122	5.2346	5.01348	5.10454	67194	2700038G22Rik	0.978883	1	0.759636	0.651691	0.694151	67194	2700038G22Rik	2.804	1.79575	0.980409	0.510109
67188	2700046G09Rik	-0.227768	0.411745	0.578263	-0.494761	0.108762	0.167941	0.0931623	0.778161	0.833658	0.707142	0.0214477	0.0447536	67188	2700046G09Rik	-0.227768	-0.820824	0.411746	0.578264	-0.722529	-2.41956	0.0155394	0.032787	-0.629367	-2.08405	0.0371554	0.0528214	0.0777753	0.285254	0.77545	0.82886	4.76904	4.63301	4.35455	4.37944	4.81679	67188	2700046G09Rik	0.967442	0.880394	0.72586	0.738492	1	67188	2700046G09Rik	1.14879	0.456276	0.461719	0.304191
76967	2700049A03Rik	-0.108911	0.484179	0.645038	-1.55951	2.22473e-19	1.56029e-18	-0.809004	8.75934e-05	0.000224431	0.613182	0.00304909	0.00770587	76967	2700049A03Rik	-0.108911	-0.699596	0.48418	0.64504	-1.66842	-9.72069	2.46116e-22	1.72838e-21	-2.47742	-12.9225	3.3598e-38	1.80669e-37	-1.86424	-10.8063	3.21374e-27	1.90371e-26	7.54089	7.46313	6.42683	5.97882	6.31368	76967	2700049A03Rik	1	0.947527	0.461992	0.338666	0.427144	76967	2700049A03Rik	2.09231	1.689	0.346611	0.17901
68046	2700062C07Rik	-0.311006	0.0101971	0.0302534	0.428947	0.000523794	0.00127012	0.0775552	0.528135	0.618859	0.0485794	0.688678	0.784383	68046	2700062C07Rik	-0.311006	-2.56907	0.0101971	0.0302535	0.117941	0.98704	0.323623	0.503419	0.195497	1.62503	0.104156	0.137086	0.244076	2.07266	0.0382038	0.0596515	7.72769	7.52697	7.80386	7.85452	7.88507	68046	2700062C07Rik	0.896648	0.780189	0.945263	0.979043	1	68046	2700062C07Rik	8.89231	6.11519	7.34186	5.35294
108899	2700081O15Rik	0.683645	5.37475e-07	3.55485e-06	0.397933	0.00289628	0.00629641	-0.167988	0.211731	0.291726	-0.330783	0.0152073	0.0328778	108899	2700081O15Rik	0.683645	5.01243	5.3747e-07	3.55482e-06	1.08158	7.9768	1.50177e-15	8.05737e-15	0.91359	6.6544	2.84466e-11	7.39363e-11	0.582807	4.2438	2.19771e-05	5.07686e-05	7.54684	7.97172	8.23717	8.12693	7.91439	108899	2700081O15Rik	0.61971	0.831938	1	0.926434	0.799527	108899	2700081O15Rik	1.75386	2.35125	1.98122	1.6209
72658	2700097O09Rik	-0.160968	0.223001	0.372227	-0.656861	2.19577e-05	6.27774e-05	0.23131	0.170324	0.2415	0.476763	0.00196995	0.00516707	72658	2700097O09Rik	-0.160968	-1.21859	0.223002	0.372228	-0.817829	-5.47577	4.35619e-08	1.58717e-07	-0.58652	-3.95831	7.54826e-05	0.000139741	-0.109757	-0.827584	0.407906	0.494514	6.43058	6.32552	5.91898	6.06185	6.35937	72658	2700097O09Rik	1	0.929766	0.701448	0.774467	0.951839	72658	2700097O09Rik	4.0154	2.76346	1.36367	1.45786
77022	2700099C18Rik	-0.0171359	0.900568	0.944727	-0.396558	0.00517936	0.0107562	-1.83429	7.88683e-27	7.86978e-26	0.0429875	0.818301	0.879816	77022	2700099C18Rik	-0.0171356	-0.124942	0.90057	0.941826	-0.413694	-2.94349	0.0032453	0.00756651	-2.24799	-13.4461	3.24436e-41	1.84721e-40	-2.205	-13.8025	2.46103e-43	2.09327e-42	7.81889	7.80933	7.53116	6.41318	6.42582	77022	2700099C18Rik	1	0.993395	0.819185	0.37743	0.380753	77022	2700099C18Rik	12.7491	9.25623	5.67247	1.30504
66456	2810001G20Rik	-0.301792	0.114449	0.223044	-0.548413	0.00897724	0.0178431	-0.180461	0.431062	0.527518	0.240565	0.286681	0.405408	66456	2810001G20Rik	-0.301792	-1.57851	0.114449	0.223045	-0.850205	-4.1702	3.04338e-05	8.87567e-05	-1.03067	-4.85642	1.19529e-06	2.49407e-06	-0.7901	-3.94892	7.85037e-05	0.00017253	6.18252	5.9788	5.62146	5.53912	5.68127	66456	2810001G20Rik	1	0.868311	0.677803	0.640204	0.706496	66456	2810001G20Rik	4.0267	2.80964	2.02588	1.18192
66457	2810002D19Rik	-0.0916369	0.538326	0.690403	-0.463186	0.00457595	0.0095983	0.437989	0.00950435	0.0180344	0.219817	0.164034	0.257604	66457	2810002D19Rik	-0.0916367	-0.615346	0.538326	0.690401	-0.554822	-3.48307	0.000495701	0.00128195	-0.116834	-0.753888	0.450916	0.512414	0.102983	0.697411	0.485546	0.571741	6.56747	6.50771	6.21886	6.49337	6.63568	66457	2810002D19Rik	0.953819	0.91512	0.749073	0.906067	1	66457	2810002D19Rik	2.75638	2.04222	1.67094	1.43519
66523	2810004N23Rik	0.0027188	0.976226	0.990452	-0.209161	0.0266238	0.0478733	-0.0385247	0.692784	0.765339	0.306665	0.00135773	0.00367191	66523	2810004N23Rik	0.00271891	0.0298013	0.976226	0.987507	-0.206442	-2.21433	0.0268064	0.0544134	-0.244966	-2.59202	0.00954143	0.0147136	0.0616986	0.675287	0.499494	0.585364	8.81893	8.81772	8.68189	8.66089	8.86001	66523	2810004N23Rik	0.971927	0.971114	0.883854	0.871083	1	66523	2810004N23Rik	15.1336	12.1773	9.84356	7.72967
72650	2810006K23Rik	-0.623613	7.40552e-07	4.82098e-06	-1.37768	2.05809e-17	1.32447e-16	0.463571	0.0102027	0.0192664	0.789681	5.19582e-07	2.29101e-06	72650	2810006K23Rik	-0.623613	-4.95041	7.40556e-07	4.82101e-06	-2.00129	-12.8309	1.10106e-37	1.21398e-36	-1.53772	-10.3426	4.52141e-25	1.81818e-24	-0.748042	-5.81906	5.91796e-09	1.75028e-08	7.1632	6.73825	5.90499	6.16685	6.66178	72650	2810006K23Rik	1	0.744863	0.418064	0.501268	0.70641	72650	2810006K23Rik	3.31913	1.26629	0.491657	0.556187
100503178	2810013P06Rik	-1.39061	2.67651e-29	6.74321e-28	-0.909152	1.26033e-08	4.86765e-08	0.830246	6.05699e-07	1.9339e-06	0.675834	1.40943e-06	5.91496e-06	100503178	2810013P06Rik	-1.39061	-11.2372	2.67652e-29	6.74325e-28	-2.29976	-15.5892	8.62155e-55	1.3494e-53	-1.46952	-11.1127	1.0879e-28	4.79587e-28	-0.793685	-6.77908	1.20944e-11	4.12254e-11	7.49183	6.56307	6.0211	6.50967	6.94934	100503178	2810013P06Rik	1	0.525307	0.360799	0.506219	0.686585	100503178	2810013P06Rik	5.85805	1.7757	0.967988	1.39481
69944	2810021J22Rik	-1.68085	3.81451e-21	6.98931e-20	0.655509	0.000791381	0.00186874	1.09686	2.85546e-10	1.19454e-09	0.514747	0.000771538	0.00218314	69944	2810021J22Rik	-1.68085	-9.43759	3.81454e-21	6.98938e-20	-1.02535	-6.08921	1.13472e-09	4.58648e-09	0.0715174	0.463489	0.643014	0.695549	0.586264	3.99492	6.47148e-05	0.000143124	6.75144	5.71837	6.10851	6.79741	7.14526	69944	2810021J22Rik	0.761109	0.371932	0.487425	0.785755	1	69944	2810021J22Rik	1.21424	0.306111	0.316803	0.700672
69953	2810025M15Rik	0.125042	0.362264	0.529197	-0.415674	0.00341797	0.00733103	-1.03948	6.00469e-11	2.62973e-10	-0.871275	1.29097e-06	5.4402e-06	69953	2810025M15Rik	0.125042	0.911061	0.362263	0.529196	-0.290631	-2.05937	0.0394587	0.0774729	-1.33011	-8.60076	7.91923e-18	2.60085e-17	-2.20138	-13.3711	8.92616e-41	7.1767e-40	7.6166	7.69965	7.41601	6.76544	6.26841	69953	2810025M15Rik	0.94406	1	0.821513	0.523326	0.370812	69953	2810025M15Rik	7.14959	6.45009	5.50925	2.00675
100504687	2810029C07Rik	-1.44335	0.0256981	0.0668099	0.525237	0.464341	0.562015	-0.254501	0.727545	0.794382	-0.152653	0.838926	0.893152	100504687	2810029C07Rik	-1.44335	-2.23074	0.0256982	0.0668101	-0.918115	-1.48235	0.138248	0.240693	-1.17262	-1.77363	0.0761246	0.102889	-1.32527	-2.05907	0.0394878	0.0614836	2.26746	1.68193	1.85073	1.76964	1.68719	100504687	2810029C07Rik	1	0.666404	0.749119	0.708176	0.668836	100504687	2810029C07Rik	0.200236	0.036494	0.0881269	0.034062
72665	2810039B14Rik	-1.45211	0.005266	0.0169963	0.499668	0.37785	0.477668	-0.0532402	0.924857	0.945222	0.106576	0.847932	0.898059	72665	2810039B14Rik	-1.45211	-2.79029	0.00526603	0.0169964	-0.952445	-1.88769	0.0590676	0.112124	-1.00569	-1.94121	0.0522327	0.0725615	-0.899109	-1.81669	0.0692641	0.102611	3.34978	2.67269	2.86892	2.8615	2.86808	72665	2810039B14Rik	1	0.625426	0.716552	0.712874	0.716131	72665	2810039B14Rik	0.261835	0.141327	0.23402	0.150752
72716	2810047C21Rik1	-0.369472	0.600375	0.741178	2.54747	6.75487e-05	0.000182423	-0.802289	0.130054	0.191198	-1.22204	0.0522014	0.0979088	72716	2810047C21Rik1	-0.369471	-0.523861	0.600376	0.741179	2.178	3.8001	0.000144637	0.000394511	1.37572	2.25797	0.0239473	0.0350328	0.153671	0.23092	0.817377	0.862964	1.96115	1.859	2.93431	2.48919	2.01707	72716	2810047C21Rik1	0.50939	0.474569	1	0.73452	0.529521	72716	2810047C21Rik1	0.0865431	0.0650633	0.314234	0.0809696
100504278	2810402E24Rik	-0.499165	0.00251928	0.00889997	-0.229716	0.200201	0.282712	-0.0977986	0.607116	0.690974	0.52712	0.00397889	0.00981011	100504278	2810402E24Rik	-0.499165	-3.02102	0.00251929	0.00890001	-0.728881	-4.24103	2.22494e-05	6.58851e-05	-0.826679	-4.67064	3.00264e-06	6.11524e-06	-0.299559	-1.82747	0.0676289	0.100342	6.653	6.32262	6.18132	6.12594	6.45535	100504278	2810402E24Rik	1	0.795329	0.721124	0.693968	0.871969	100504278	2810402E24Rik	4.72669	2.28381	2.0743	1.94072
69964	2810403D21Rik	0.475803	0.156411	0.28438	-1.3035	0.000363143	0.000896916	-0.59461	0.161413	0.230448	-0.868127	0.0711414	0.12753	69964	2810403D21Rik	0.475803	1.41725	0.15641	0.284378	-0.827698	-2.25301	0.0242586	0.0496275	-1.42231	-3.56292	0.000366757	0.000644814	-2.29043	-5.30884	1.10327e-07	3.02278e-07	4.57653	4.85116	4.06843	3.73043	3.35334	69964	2810403D21Rik	0.826664	1	0.581269	0.459864	0.35409	69964	2810403D21Rik	1.34491	1.24171	0.685373	0.364243
70419	2810408A11Rik	-1.13766	0.00342341	0.0116818	-0.627576	0.190701	0.271102	-1.63408	0.0237963	0.0418918	-0.588592	0.521073	0.640542	70419	2810408A11Rik	-1.13766	-2.92691	0.00342343	0.0116819	-1.76523	-3.99593	6.44399e-05	0.000182566	-3.39931	-5.10301	3.34285e-07	7.20817e-07	-3.9879	-5.56179	2.67018e-08	7.59677e-08	3.50744	2.83864	2.52629	2.01808	1.8686	70419	2810408A11Rik	1	0.629029	0.506577	0.356172	0.321115	70419	2810408A11Rik	0.637441	0.191692	0.0822939	0.0596389
69941	2810408I11Rik	0.309085	0.144645	0.267884	0.0799978	0.708666	0.780252	-1.00639	2.97707e-05	8.05935e-05	-0.354823	0.179642	0.277759	69941	2810408I11Rik	0.309085	1.45871	0.144645	0.267884	0.389083	1.81892	0.0689234	0.128783	-0.617307	-2.58187	0.00982664	0.0151359	-0.972131	-4.04977	5.12686e-05	0.000114526	5.53078	5.71109	5.76413	5.16038	4.95804	69941	2810408I11Rik	0.850653	0.963899	1	0.658042	0.571926	69941	2810408I11Rik	2.94332	2.2503	3.2363	1.02683
100042332	2810410L24Rik	-2.00474	0.000233957	0.00104028	0.537688	0.356607	0.455806	-0.294653	0.617948	0.701121	-2.05527	0.0058868	0.0140283	100042332	2810410L24Rik	-2.00474	-3.67921	0.00023396	0.00104029	-1.46705	-2.75785	0.00581837	0.0131098	-1.7617	-3.18611	0.00144202	0.0024176	-3.81697	-5.44666	5.13237e-08	1.43584e-07	4.06462	2.80005	3.12251	3.01562	2.28729	100042332	2810410L24Rik	1	0.416222	0.52047	0.483302	0.291723	100042332	2810410L24Rik	0.750142	0.208873	0.080703	0.0779813
72813	2810454H06Rik	0.832531	0.0319296	0.0805231	-0.71038	0.0777364	0.125156	-1.76595	0.00157436	0.00340561	0.999953	0.0847629	0.148117	72813	2810454H06Rik	0.832532	2.14529	0.0319294	0.0805225	0.122152	0.294387	0.768462	0.964684	-1.6438	-2.99788	0.00271862	0.00443393	-0.643844	-1.45169	0.146588	0.202314	3.41831	3.88659	3.4424	2.73051	3.07806	72813	2810454H06Rik	0.722827	1	0.735001	0.448731	0.570966	72813	2810454H06Rik	0.163681	0.265044	0.219441	0.01178
67261	2900005J15Rik	-2.64314	2.01784e-52	9.25425e-51	-0.281284	0.200303	0.282832	1.20156	1.03134e-08	3.846e-08	1.24908	4.58846e-14	3.84497e-13	67261	2900005J15Rik	-2.64313	-15.2367	2.01782e-52	9.2542e-51	-2.92442	-15.4173	1.25324e-53	1.9088e-52	-1.72286	-10.7061	9.5311e-27	4.00296e-26	-0.473781	-3.40658	0.000657833	0.00131487	7.25731	5.57229	5.42095	6.1064	6.92438	67261	2900005J15Rik	1	0.310998	0.280029	0.450342	0.793921	67261	2900005J15Rik	6.19356	0.719057	0.525155	1.1131
67254	2900011O08Rik	0.32437	0.822833	0.896049	6.62573	1.76625e-10	7.73523e-10	2.13477	6.92097e-25	6.44328e-24	-0.0664498	0.686379	0.782521	67254	2900011O08Rik	0.324363	0.223898	0.822837	0.89605	6.9501	6.6928	2.18938e-11	9.74224e-11	9.08487	8.81008	1.25054e-18	4.21648e-18	9.01842	8.74918	2.14912e-18	9.66988e-18	2.73692	2.82632	4.68237	6.15945	6.12093	67254	2900011O08Rik	0.0932645	0.0992265	0.359217	1	0.973658	67254	2900011O08Rik	0	0.01514	0.394854	1.66746
243219	2900026A02Rik	-0.0207271	0.914017	0.953334	-2.08478	5.4613e-25	4.80497e-24	-3.22806	3.3678e-27	3.41259e-26	3.10832	2.34782e-25	4.12904e-24	243219	2900026A02Rik	-0.0207266	-0.10797	0.91402	0.950424	-2.1055	-10.4531	1.41864e-25	1.11813e-24	-5.33357	-18.2525	1.97733e-74	1.86402e-73	-2.22524	-11.057	2.02784e-28	1.23594e-27	8.48992	8.46958	7.05175	5.52927	6.9684	243219	2900026A02Rik	1	0.985996	0.369034	0.128456	0.348318	243219	2900026A02Rik	4.77059	3.37125	0.460144	0.0741043
68204	2900060B14Rik	2.26784	0.00453282	0.014935	-2.19408	0.0114683	0.0223333	1.47316	0.109082	0.164062	0.0587045	0.937778	0.960798	68204	2900060B14Rik	2.26784	2.83849	0.00453278	0.0149351	0.0737617	0.0748971	0.940297	0.986533	1.54692	1.81006	0.0702871	0.0956259	1.60563	1.93144	0.0534289	0.0809379	1.22871	1.97396	1.25906	1.65348	1.66643	68204	2900060B14Rik	0.596563	1	0.609246	0.800799	0.808024	68204	2900060B14Rik	0.11916	0.656954	0	0.222972
100504421	2900076A07Rik	-1.99677	1.49414e-19	2.54586e-18	-0.0466914	0.855452	0.894787	1.2904	9.08667e-08	3.11339e-07	0.251392	0.232446	0.342827	100504421	2900076A07Rik	-1.99677	-9.04518	1.49416e-19	2.54589e-18	-2.04346	-8.94259	3.80144e-19	2.38067e-18	-0.753063	-3.7037	0.000212474	0.000379919	-0.501671	-2.56571	0.0102965	0.0175995	6.48342	5.22855	5.1931	5.97372	6.13825	100504421	2900076A07Rik	1	0.419031	0.408858	0.702368	0.787211	100504421	2900076A07Rik	6.45577	1.33601	1.29049	2.14323
347740	2900097C17Rik	-0.0706193	0.361784	0.528849	0.214094	0.00617326	0.0126331	0.101898	0.193565	0.26975	0.0773516	0.31996	0.441037	347740	2900097C17Rik	-0.0706192	-0.91197	0.361785	0.52885	0.143475	1.85237	0.0639723	0.120443	0.245373	3.16067	0.00157406	0.00262774	0.322725	4.19954	2.6746e-05	6.12604e-05	10.1193	10.072	10.2115	10.2786	10.3295	347740	2900097C17Rik	0.864426	0.836565	0.921524	0.965344	1	347740	2900097C17Rik	11.3573	8.68707	7.32647	6.99817
378954	3000002C10Rik	-1.1307	0.000160469	0.000737052	0.231538	0.487287	0.584432	0.216495	0.514388	0.606053	0.967695	0.00125636	0.00341827	378954	3000002C10Rik	-1.1307	-3.77428	0.00016047	0.000737057	-0.899162	-3.00388	0.0026656	0.0063008	-0.682667	-2.28985	0.0220302	0.0323962	0.285027	1.08228	0.279128	0.357467	4.74965	4.11078	4.23128	4.35935	4.94254	378954	3000002C10Rik	0.874853	0.561845	0.610787	0.66749	1	378954	3000002C10Rik	1.22365	0.418155	0.484691	0.494364
109163	3010003L21Rik	-0.474696	0.0687097	0.148994	-0.0408618	0.887124	0.917339	-1.68767	2.95149e-05	7.99561e-05	0.966445	0.0217291	0.0452853	109163	3010003L21Rik	-0.474696	-1.82032	0.0687099	0.148995	-0.515557	-1.91088	0.05602	0.10687	-2.20323	-5.71969	1.06717e-08	2.47299e-08	-1.23678	-4.19477	2.73154e-05	6.25122e-05	4.48785	4.19617	4.16967	3.3672	3.768	109163	3010003L21Rik	1	0.81695	0.802079	0.459888	0.60716	109163	3010003L21Rik	0.870505	0.527616	0.313626	0.113643
73103	3110009E18Rik	0.464508	0.0495918	0.114941	1.5772	2.07957e-12	1.02741e-11	-2.50707	1.11521e-23	9.74628e-23	-0.395457	0.163015	0.256425	73103	3110009E18Rik	0.464508	1.96347	0.0495915	0.114941	2.04171	9.02705	1.76364e-19	1.1204e-18	-0.465364	-1.78361	0.0744878	0.100897	-0.860821	-3.27465	0.00105792	0.00206585	5.56532	5.83997	6.92793	5.30355	5.07624	73103	3110009E18Rik	0.388878	0.470426	1	0.324349	0.277068	73103	3110009E18Rik	1.33915	1.57156	5.62931	0.825087
67289	3110021A11Rik	0.933907	0.0106889	0.0315235	-1.24701	0.00216771	0.0048023	-1.01432	0.0640229	0.102426	-0.0359775	0.952252	0.970499	67289	3110021A11Rik	0.933908	2.55271	0.0106889	0.0315233	-0.313099	-0.74065	0.458906	0.669025	-1.32742	-2.56162	0.0104186	0.0159881	-1.3634	-2.78321	0.00538234	0.0095905	3.14889	3.67753	2.98575	2.60009	2.56657	67289	3110021A11Rik	0.69321	1	0.61909	0.473869	0.462986	67289	3110021A11Rik	0.76493	0.638973	0.370323	0.119278
67290	3110040N11Rik	-0.0996863	0.476765	0.638783	-0.260744	0.0704662	0.114426	-0.293341	0.0502678	0.0826788	0.384496	0.00969827	0.0218983	67290	3110040N11Rik	-0.099686	-0.711513	0.476766	0.638782	-0.36043	-2.52774	0.0114801	0.0247322	-0.65377	-4.47904	7.49785e-06	1.48984e-05	-0.269274	-1.90499	0.0567817	0.0855052	8.11007	8.03323	7.86895	7.6932	7.93323	67290	3110040N11Rik	1	0.948135	0.846093	0.749048	0.884642	67290	3110040N11Rik	14.6095	9.56893	9.28313	5.24224
67303	3110045C21Rik	-0.0847818	0.78293	0.872022	-1.04866	0.00711148	0.0144084	0.982771	0.0155359	0.0283912	0.519188	0.115078	0.191481	67303	3110045C21Rik	-0.0847813	-0.275502	0.782931	0.872023	-1.13344	-2.99444	0.00274952	0.00648296	-0.15067	-0.458649	0.646486	0.698741	0.368517	1.25018	0.211233	0.280473	3.80797	3.75383	3.25014	3.72818	4.00924	67303	3110045C21Rik	0.869788	0.83775	0.590866	0.822991	1	67303	3110045C21Rik	0.658109	0.534035	0.151718	0.351843
382686	3110053B16Rik	-0.554462	0.408203	0.574869	-0.427543	0.575946	0.665443	-0.0257026	0.975328	0.982401	-0.324857	0.702353	0.794641	382686	3110053B16Rik	-0.55446	-0.827058	0.408204	0.574871	-0.982004	-1.35607	0.175076	0.296743	-1.00771	-1.35118	0.176638	0.222396	-1.33256	-1.78599	0.0741001	0.109185	1.92381	1.71832	1.57453	1.50602	1.47765	382686	3110053B16Rik	1	0.867245	0.784978	0.748571	0.733997	382686	3110053B16Rik	0.619085	0.225663	0.163481	0
73204	3110056K07Rik	-0.235638	0.0878782	0.180493	0.0489818	0.7386	0.804962	0.685242	1.6406e-06	5.03339e-06	-0.251451	0.0637791	0.11614	73204	3110056K07Rik	-0.235638	-1.7067	0.0878785	0.180494	-0.186656	-1.32732	0.184402	0.310218	0.498586	3.72098	0.000198452	0.000355678	0.247135	1.85537	0.0635435	0.0948281	6.71048	6.56153	6.59239	7.03151	6.86809	73204	3110056K07Rik	0.800496	0.721975	0.737585	1	0.892903	73204	3110056K07Rik	3.58155	2.28872	1.60388	2.80637
67304	3110070M22Rik	-0.708825	0.193483	0.334624	-1.59635	0.0402976	0.0696216	-0.350837	0.72929	0.795479	1.83346	0.0388986	0.075827	67304	3110070M22Rik	-0.708824	-1.30034	0.193483	0.334626	-2.30518	-3.09698	0.00195504	0.00470072	-2.65601	-3.13051	0.00174506	0.00290325	-0.822549	-1.47013	0.141527	0.196002	2.27977	1.96052	1.48058	1.41554	1.90878	67304	3110070M22Rik	1	0.801489	0.574673	0.549342	0.773256	67304	3110070M22Rik	0.220731	0.0948263	0	0.0295022
73212	3110082I17Rik	0.0587026	0.420232	0.585992	-0.411929	8.10613e-08	2.93503e-07	-1.02879	1.54179e-30	1.78993e-29	0.366649	7.52838e-05	0.00025026	73212	3110082I17Rik	0.0587027	0.806019	0.420232	0.585991	-0.353227	-4.65474	3.24384e-06	1.03152e-05	-1.38202	-16.0314	7.71214e-58	5.90272e-57	-1.01537	-12.7753	2.25197e-37	1.67473e-36	8.97215	9.01162	8.73524	8.0871	8.30873	73212	3110082I17Rik	0.973013	1	0.825657	0.526856	0.614341	73212	3110082I17Rik	17.0177	14.7646	9.49988	3.80391
69277	3300002I08Rik	-0.471731	0.354698	0.521827	-0.110291	0.84678	0.887718	-0.336222	0.59653	0.682047	-0.333351	0.621689	0.728424	69277	3300002I08Rik	-0.471731	-0.925514	0.354699	0.521828	-0.582022	-1.09031	0.275578	0.439675	-0.918243	-1.58075	0.113934	0.149005	-1.25159	-2.15209	0.0313902	0.0497849	2.43168	2.21876	2.17209	2.04795	1.95055	69277	3300002I08Rik	1	0.862787	0.835322	0.766449	0.716415	69277	3300002I08Rik	0.274454	0.220091	0.212593	0.205423
78512	3300005D01Rik	-0.508579	0.1053	0.208235	-0.253451	0.45618	0.55405	-2.40691	3.16474e-06	9.46346e-06	-0.341503	0.59482	0.705423	78512	3300005D01Rik	-0.508578	-1.61968	0.105301	0.208236	-0.762029	-2.33313	0.0196414	0.0407403	-3.16894	-6.34098	2.2831e-10	5.70526e-10	-3.51044	-6.98874	2.77361e-12	9.78258e-12	4.53072	4.19069	4.00394	2.91189	2.81721	78512	3300005D01Rik	1	0.790024	0.6941	0.325599	0.304916	78512	3300005D01Rik	1.3328	0.612336	0.322623	0.155871
70691	3830403N18Rik	0.59021	0.00897617	0.027093	-0.118024	0.604081	0.690529	-0.18719	0.442837	0.539584	0.0227042	0.926018	0.952545	70691	3830403N18Rik	0.59021	2.61296	0.00897612	0.0270928	0.472186	2.02713	0.0426496	0.083203	0.284996	1.17603	0.239584	0.292905	0.3077	1.31741	0.1877	0.252487	4.82789	5.1795	5.1153	4.9978	5.02194	70691	3830403N18Rik	0.78371	1	0.95648	0.881667	0.896543	70691	3830403N18Rik	0.732308	0.803978	1.01294	0.554642
218734	3830406C13Rik	-0.0988688	0.237463	0.38995	0.094503	0.269605	0.363488	0.352062	3.798e-05	0.000101868	-0.0112939	0.892756	0.92934	218734	3830406C13Rik	-0.0988687	-1.18135	0.237463	0.389951	-0.00436575	-0.0518432	0.958654	0.986533	0.347696	4.16157	3.16067e-05	6.01627e-05	0.336403	4.0779	4.54447e-05	0.000101848	9.16206	9.09767	9.15832	9.38907	9.3792	218734	3830406C13Rik	0.854403	0.817109	0.852189	1	0.993177	218734	3830406C13Rik	11.3012	7.25473	6.77121	7.89979
100040322	3830408C21Rik	-1.69088	9.98297e-05	0.000476569	-0.91799	0.133529	0.200466	0.778433	0.229047	0.311687	-0.051997	0.927362	0.953378	100040322	3830408C21Rik	-1.69088	-3.891	9.98303e-05	0.000476567	-2.60887	-4.73776	2.1609e-06	6.97662e-06	-1.83044	-3.79038	0.000150414	0.000272131	-1.88244	-4.11182	3.92559e-05	8.85572e-05	3.33866	2.4548	2.14432	2.40248	2.38212	100040322	3830408C21Rik	1	0.541916	0.436987	0.522616	0.515291	100040322	3830408C21Rik	0.50599	0.131498	0.0362908	0.0701339
381218	4430402I18Rik	-0.180936	0.67225	0.796406	-0.711068	0.152118	0.224108	-0.723764	0.241419	0.325907	0.231291	0.717656	0.806948	381218	4430402I18Rik	-0.180935	-0.42306	0.672251	0.796407	-0.892003	-1.85607	0.0634434	0.119503	-1.61577	-2.86396	0.00418385	0.00671596	-1.38448	-2.72242	0.00648061	0.01142	2.99042	2.87573	2.54101	2.29515	2.35184	381218	4430402I18Rik	1	0.923579	0.732343	0.617593	0.642344	381218	4430402I18Rik	0.21487	0.115977	0.0480112	0.046392
109292	4631423B10Rik	-2.67936	6.69304e-06	3.81982e-05	-2.24232	0.0387758	0.0673333	1.3882	0.244857	0.32998	1.65263	0.0472052	0.0897914	109292	4631423B10Rik	-2.67936	-4.50322	6.69309e-06	3.81985e-05	-4.92168	-4.89579	9.79102e-07	3.24016e-06	-3.53348	-4.54661	5.45168e-06	1.09209e-05	-1.88085	-3.55457	0.000378603	0.000777142	2.99104	1.67419	1.30583	1.51267	1.98744	109292	4631423B10Rik	1	0.401409	0.310957	0.358894	0.498753	109292	4631423B10Rik	0.175056	0.0109673	0	0.0102364
70808	4632415L05Rik	-2.374	1.12121e-73	6.60565e-72	3.45847	1.43628e-157	1.1502e-155	0.110476	0.265031	0.353525	-0.415213	3.08158e-05	0.000108216	70808	4632415L05Rik	-2.374	-18.1574	1.12124e-73	6.60582e-72	1.08447	10.7627	5.16517e-27	4.27472e-26	1.19494	11.8334	2.62173e-32	1.25713e-31	0.77973	7.69946	1.36641e-14	5.33654e-14	8.40792	7.09217	9.13483	9.21224	8.92435	70808	4632415L05Rik	0.572632	0.230036	0.947757	1	0.819094	70808	4632415L05Rik	3.92524	0.762667	5.27399	4.6755
666737	4632427E13Rik	0.883303	0.0420066	0.100635	-0.559256	0.207704	0.291864	-0.278418	0.572278	0.660039	0.400477	0.407273	0.532193	666737	4632427E13Rik	0.883303	2.03346	0.0420064	0.100634	0.324047	0.702267	0.482513	0.696179	0.0456295	0.0941752	0.92497	0.939613	0.446106	0.989124	0.322603	0.40473	3.09859	3.56772	3.21802	3.13704	3.33007	666737	4632427E13Rik	0.722405	1	0.78475	0.741913	0.848129	666737	4632427E13Rik	0.638013	0.746137	0.566278	0.298462
320737	4732416N19Rik	-1.55768	0.272175	0.430523	-0.176682	0.911178	0.935618	-0.535129	0.753084	0.813741	-0.962484	0.594621	0.705258	320737	4732416N19Rik	-1.55768	-1.09807	0.272176	0.430524	-1.73436	-1.18491	0.236055	0.38491	-2.26949	-1.46631	0.142563	0.183078	-3.23197	-2.03632	0.0417183	0.0646567	0.301167	-0.030005	-0.119732	-0.135367	-0.239561	320737	4732416N19Rik	1	0.794891	0.746959	0.738908	0.687424	320737	4732416N19Rik	0.129108	0	0.187514	0
224523	4732491K20Rik	-0.650951	0.0097909	0.0292182	-1.66419	3.98076e-06	1.24022e-05	0.634788	0.11871	0.176916	0.930808	0.00541409	0.0129908	224523	4732491K20Rik	-0.650951	-2.58313	0.00979094	0.0292183	-2.31514	-6.68596	2.29417e-11	1.0204e-10	-1.68036	-5.34129	9.22876e-08	2.04627e-07	-0.749549	-2.90973	0.00361739	0.00660151	4.77795	4.36476	3.52244	3.8128	4.30024	224523	4732491K20Rik	1	0.750963	0.418845	0.512228	0.718117	224523	4732491K20Rik	0.549115	0.247134	0.0542533	0.0838778
320798	4831440D22Rik	0.281303	0.458731	0.623306	-0.534617	0.180251	0.258258	-0.738673	0.102876	0.155743	0.47765	0.295212	0.414412	320798	4831440D22Rik	0.281304	0.74094	0.45873	0.623308	-0.253313	-0.636115	0.524701	0.741947	-0.991986	-2.27523	0.0228922	0.033584	-0.514335	-1.27891	0.200929	0.268329	4.11619	4.22618	3.95477	3.58586	3.78764	320798	4831440D22Rik	0.926596	1	0.828513	0.64157	0.737882	320798	4831440D22Rik	0.362615	0.154206	0.20215	0.133649
320965	4831440E17Rik	-2.56011	1.23116e-09	1.08074e-08	-0.0075051	0.988409	0.991836	0.223241	0.672737	0.748089	1.07945	0.0200633	0.042123	320965	4831440E17Rik	-2.56011	-6.07613	1.23117e-09	1.08075e-08	-2.56761	-5.8511	4.88342e-09	1.89142e-08	-2.34437	-5.37922	7.48108e-08	1.66542e-07	-1.26492	-3.52514	0.000423264	0.000864501	4.38829	2.94858	2.90043	3.03502	3.58193	320965	4831440E17Rik	1	0.368642	0.356541	0.391405	0.571823	320965	4831440E17Rik	0.387862	0.0304936	0.0883643	0.0142307
73906	4833417C18Rik	-0.388507	0.181111	0.318075	-2.30893	4.30327e-07	1.46803e-06	0.803882	0.125365	0.185372	2.135	4.65476e-08	2.30377e-07	73906	4833417C18Rik	-0.388506	-1.33734	0.181111	0.318076	-2.69744	-6.04261	1.5164e-09	6.08705e-09	-1.89356	-4.87501	1.08806e-06	2.27683e-06	0.241446	0.87086	0.383831	0.470054	4.3813	4.13509	3.08193	3.35946	4.52798	73906	4833417C18Rik	0.90333	0.761606	0.367025	0.444877	1	73906	4833417C18Rik	0.809004	0.567664	0.156664	0.126151
74597	4833418N02Rik	0.246715	0.462363	0.62649	-1.54948	0.000102482	0.000269982	-0.935699	0.0766158	0.119968	0.464094	0.393574	0.518916	74597	4833418N02Rik	0.246715	0.734964	0.462361	0.626488	-1.30277	-3.27631	0.00105174	0.00261334	-2.23847	-4.63777	3.52193e-06	7.14477e-06	-1.77437	-4.24389	2.19681e-05	5.0755e-05	4.02947	4.19022	3.28493	2.933	3.03614	74597	4833418N02Rik	0.894558	1	0.533927	0.41835	0.449352	74597	4833418N02Rik	0.743931	0.605897	0.157569	0.0870027
73915	4833419F23Rik	0.556596	0.0182501	0.0499741	0.534202	0.0203611	0.0376339	0.387879	0.0857511	0.132751	-0.676195	0.00291075	0.00738315	73915	4833419F23Rik	0.556596	2.36051	0.01825	0.0499738	1.0908	4.68309	2.82587e-06	9.03385e-06	1.47868	6.39152	1.6425e-10	4.13337e-10	0.802482	3.42532	0.000614086	0.00123086	5.85552	6.18491	6.53325	6.79282	6.32841	73915	4833419F23Rik	0.522211	0.656148	0.835337	1	0.724769	73915	4833419F23Rik	1.89756	2.6306	4.06556	4.26841
67392	4833420G17Rik	-0.355995	1.44495e-08	1.14624e-07	-0.884925	1.11118e-37	1.4343e-36	-0.124343	0.0978696	0.149113	0.493231	1.26572e-11	8.81685e-11	67392	4833420G17Rik	-0.355995	-5.66797	1.44496e-08	1.14624e-07	-1.24092	-18.3809	1.86822e-75	3.96543e-74	-1.36526	-19.6434	6.58071e-86	7.1807e-85	-0.872032	-13.4252	4.30302e-41	3.48865e-40	9.94192	9.69827	9.12262	9.0462	9.35649	67392	4833420G17Rik	1	0.844605	0.566717	0.537477	0.66645	67392	4833420G17Rik	22.5403	13.2318	5.9696	4.56039
100504504	4833423F13Rik	-4.21873	6.04486e-12	6.52079e-11	-2.66605	0.0245996	0.0446427	-0.53701	0.718331	0.78719	0	1	1	100504504	4833423F13Rik	-4.21873	-6.87859	6.04491e-12	6.52085e-11	-6.88478	-6.32203	2.58151e-10	1.082e-09	-7.42179	-6.81515	9.41684e-12	2.50632e-11	-7.74436	-7.11135	1.14915e-12	4.13914e-12	3.9341	1.42458	0.988106	0.954369	0.883528	100504504	4833423F13Rik	1	0.175614	0.129768	0.126768	0.120694	100504504	4833423F13Rik	1.36388	0.0434019	0.0209617	0
100503871	4833432E10Rik	-1.16703	5.47055e-05	0.000272336	0.255032	0.435448	0.534135	-0.25754	0.455741	0.552209	-0.0138937	0.968365	0.981142	100503871	4833432E10Rik	-1.16703	-4.03456	5.47058e-05	0.000272338	-0.911998	-3.16757	0.00153717	0.00373811	-1.16954	-3.77528	0.000159829	0.000288611	-1.18343	-4.02527	5.69106e-05	0.000126613	4.50252	3.81814	3.96554	3.83167	3.80849	100503871	4833432E10Rik	1	0.622273	0.689212	0.628135	0.618125	100503871	4833432E10Rik	0.437808	0.214078	0.155089	0.119887
100503392	4833438C02Rik	1.10073	5.77496e-25	1.25121e-23	0.0510735	0.624225	0.707221	-0.111603	0.291704	0.382696	-0.542	4.96076e-07	2.19052e-06	100503392	4833438C02Rik	1.10073	10.3191	5.77486e-25	1.25119e-23	1.1518	10.7457	6.20621e-27	5.11497e-26	1.0402	9.61181	7.12866e-22	2.648e-21	0.498196	4.56561	4.98041e-06	1.21375e-05	8.30054	9.00079	9.03929	8.96142	8.60822	100503392	4833438C02Rik	0.599259	0.973666	1	0.947457	0.741713	100503392	4833438C02Rik	7.08202	10.6286	10.0546	8.82216
97820	4833439L19Rik	0.127649	0.0793886	0.166974	0.447141	7.82782e-10	3.27292e-09	0.261659	0.000291636	0.000700077	-0.147399	0.0402653	0.0782225	97820	4833439L19Rik	0.127649	1.75425	0.0793883	0.166974	0.57479	7.94022	2.01816e-15	1.07929e-14	0.836449	11.5739	5.59087e-31	2.61151e-30	0.68905	9.56643	1.10659e-21	5.56339e-21	10.3531	10.4322	10.7225	10.8992	10.7994	97820	4833439L19Rik	0.684872	0.723454	0.8847	1	0.93315	97820	4833439L19Rik	21.283	18.6274	18.3534	20.2608
66709	4921507G05Rik	-0.701131	0.0996507	0.199197	-2.70812	0.000339016	0.000840366	-0.149718	0.883259	0.916786	1.00481	0.270411	0.387046	66709	4921507G05Rik	-0.70113	-1.64655	0.0996511	0.199198	-3.40925	-4.62517	3.74297e-06	1.18474e-05	-3.55897	-4.41439	1.01295e-05	1.99573e-05	-2.55416	-4.41132	1.02742e-05	2.44059e-05	3.04475	2.63123	1.68529	1.67281	1.86792	66709	4921507G05Rik	1	0.750791	0.389731	0.386373	0.442325	66709	4921507G05Rik	0.53795	0.172557	0.0208348	0.0402644
70858	4921511I17Rik	0.599409	0.576827	0.722246	2.03815	0.0188319	0.0350262	0.998208	0.11002	0.165361	-1.59759	0.0157486	0.0339579	70858	4921511I17Rik	0.599408	0.558025	0.576827	0.722247	2.63756	2.86812	0.00412924	0.00949361	3.63576	4.08432	4.4206e-05	8.33459e-05	2.03818	2.15602	0.0310825	0.0493587	1.09027	1.19185	1.7521	2.25038	1.56311	70858	4921511I17Rik	0.447478	0.480121	0.707951	1	0.621027	70858	4921511I17Rik	0.0265244	0.0531763	0.0256823	0.19853
66714	4921524J17Rik	-0.633271	5.05072e-14	6.24935e-13	1.21877	8.25344e-48	1.36652e-46	-0.608783	1.0824e-13	5.65181e-13	-0.186471	0.0306332	0.0613706	66714	4921524J17Rik	-0.633271	-7.5306	5.05074e-14	6.24938e-13	0.585498	7.67523	1.65117e-14	8.45873e-14	-0.0232849	-0.28351	0.776786	0.812473	-0.209756	-2.59209	0.00953946	0.0164061	8.19992	7.79807	8.59196	8.18476	8.06436	66714	4921524J17Rik	0.76205	0.576788	1	0.754087	0.693709	66714	4921524J17Rik	9.9014	4.35904	9.04725	5.07002
66730	4921531C22Rik	-0.0908323	0.670579	0.795251	-0.315015	0.17212	0.248567	-0.068578	0.781526	0.836014	0.423803	0.0748246	0.133139	66730	4921531C22Rik	-0.0908319	-0.425352	0.67058	0.79525	-0.405847	-1.8057	0.070966	0.132132	-0.474425	-2.05053	0.0403127	0.0570526	-0.0506212	-0.236099	0.813356	0.859934	5.48652	5.41682	5.22161	5.19909	5.45301	66730	4921531C22Rik	1	0.952832	0.832247	0.819358	0.977037	66730	4921531C22Rik	0.98959	0.655073	0.524284	0.471664
67430	4921536K21Rik	0.370907	0.356944	0.524134	-1.44422	0.00273854	0.005975	-0.144121	0.802016	0.852991	1.57695	0.00203461	0.00532391	67430	4921536K21Rik	0.370908	0.921205	0.356943	0.524133	-1.07331	-2.22118	0.0263388	0.0535629	-1.21743	-2.38724	0.0169752	0.0253359	0.359513	0.886559	0.375316	0.461121	3.35629	3.56556	2.84022	2.79803	3.56264	67430	4921536K21Rik	0.864974	1	0.604857	0.587424	0.997978	67430	4921536K21Rik	0.135864	0.258762	0.0789305	0.101691
228602	4930402H24Rik	0.0312613	0.770674	0.864589	0.149346	0.167417	0.242864	1.29525	2.95759e-34	3.90104e-33	-0.804277	1.50372e-14	1.30726e-13	228602	4930402H24Rik	0.0312615	0.291494	0.770673	0.864588	0.180608	1.68087	0.0927886	0.168157	1.47586	14.0315	9.99576e-45	6.10649e-44	0.671586	6.33805	2.32685e-10	7.41654e-10	9.29396	9.31088	9.4066	10.2782	9.72662	228602	4930402H24Rik	0.505503	0.511465	0.546552	1	0.682287	228602	4930402H24Rik	5.96516	4.89687	3.5181	8.29119
67394	4930404I05Rik	-0.944236	0.0206681	0.0555526	1.67185	3.82974e-05	0.000106486	-0.370023	0.338258	0.432705	-0.555261	0.162659	0.256023	67394	4930404I05Rik	-0.944235	-2.31399	0.0206682	0.0555529	0.727619	1.90906	0.0562538	0.107285	0.357596	0.920364	0.357382	0.419316	-0.197665	-0.503491	0.614619	0.691402	4.77362	4.19773	5.1674	4.96581	4.66064	67394	4930404I05Rik	0.761134	0.510626	1	0.869594	0.703804	67394	4930404I05Rik	2.07305	1.13016	1.33816	0.782624
432479	4930404N11Rik	-0.524744	5.62768e-20	9.75167e-19	-1.34139	7.94711e-104	3.32634e-102	1.3641	2.10653e-105	1.77764e-103	0.402342	5.70371e-12	4.09992e-11	432479	4930404N11Rik	-0.524744	-9.15125	5.62772e-20	9.75174e-19	-1.86613	-30.5133	1.73644e-204	1.28109e-202	-0.502034	-8.6627	4.6072e-18	1.52522e-17	-0.0996921	-1.75151	0.0798577	0.116884	11.3657	11.0132	10.1833	11.0278	11.2982	432479	4930404N11Rik	1	0.783183	0.440609	0.791166	0.954244	432479	4930404N11Rik	192.534	116.506	38.8999	76.804
74846	4930405A21Rik	0.254427	0.484805	0.645367	1.3438	3.98621e-05	0.000110661	-0.283335	0.339763	0.434312	-0.417552	0.185693	0.285472	74846	4930405A21Rik	0.254427	0.698597	0.484804	0.645366	1.59823	4.9421	7.72837e-07	2.57647e-06	1.3149	3.89861	9.67478e-05	0.000177758	0.897344	2.63379	0.00844376	0.0146488	3.37157	3.49575	4.23035	4.06016	3.81557	74846	4930405A21Rik	0.551417	0.600984	1	0.888724	0.750134	74846	4930405A21Rik	0.35748	0.286671	0.796101	0.535132
320152	4930412C18Rik	-0.800861	0.0545825	0.124271	-1.92947	0.000417201	0.00102431	0.787261	0.189195	0.264459	-1.39093	0.0302688	0.0607279	320152	4930412C18Rik	-0.80086	-1.92218	0.0545828	0.124272	-2.73033	-5.14217	2.71583e-07	9.36222e-07	-1.94307	-4.01494	5.94619e-05	0.000110887	-3.334	-5.76285	8.27073e-09	2.42606e-08	4.05986	3.5504	2.60864	2.94038	2.43156	320152	4930412C18Rik	1	0.702484	0.36571	0.460259	0.323468	320152	4930412C18Rik	0.313662	0.116783	0.034709	0.0419231
100504140	4930412M03Rik	-1.21343	0.168523	0.301745	-0.054825	0.955988	0.967546	-1.65642	0.194793	0.271129	1.8764	0.134006	0.217886	100504140	4930412M03Rik	-1.21342	-1.37696	0.168523	0.301746	-1.26825	-1.39375	0.163393	0.27923	-2.92467	-2.45347	0.0141483	0.0213427	-1.04827	-1.1995	0.230334	0.302297	1.45929	0.991429	0.997464	0.741792	1.0862	100504140	4930412M03Rik	1	0.723034	0.726065	0.60815	0.772126	100504140	4930412M03Rik	0.160078	0.0962773	0.0619982	0
73951	4930413G21Rik	0.392129	0.00549677	0.0176727	-0.18787	0.188762	0.268785	-0.55397	0.000223294	0.00054313	0.0749604	0.622083	0.728504	73951	4930413G21Rik	0.392129	2.77638	0.00549674	0.0176726	0.20426	1.42609	0.153844	0.264574	-0.349711	-2.35564	0.0184908	0.027469	-0.27475	-1.89059	0.0586785	0.0881196	7.74264	8.00123	7.87369	7.52067	7.56543	73951	4930413G21Rik	0.83591	1	0.915391	0.716699	0.739287	73951	4930413G21Rik	9.03184	7.93457	5.25689	3.63168
100504512	4930426I24Rik	-0.81379	0.368348	0.535599	-2.52835	0.0555829	0.0928511	0.859126	0.581121	0.66798	1.98056	0.117433	0.19489	100504512	4930426I24Rik	-0.813788	-0.899572	0.368348	0.535598	-3.34213	-2.63688	0.00836726	0.018416	-2.48301	-2.02726	0.0426358	0.06006	-0.50245	-0.567963	0.57006	0.652051	0.990927	0.726438	0.354026	0.449614	0.764383	100504512	4930426I24Rik	1	0.832494	0.643093	0.687145	0.85468	100504512	4930426I24Rik	0.325328	0.181172	0	0.0338196
74629	4930426L09Rik	-1.62112	0.000214135	0.00095798	1.02731	0.030849	0.0547372	0.931459	0.0176126	0.0318378	-1.02416	0.00862178	0.0197471	74629	4930426L09Rik	-1.62112	-3.70173	0.000214136	0.000957984	-0.593809	-1.56003	0.118754	0.210202	0.33765	0.977349	0.328396	0.388855	-0.686513	-1.81565	0.0694236	0.102829	3.52209	2.74827	3.20113	3.6945	3.15797	74629	4930426L09Rik	0.887363	0.518989	0.710368	1	0.68943	74629	4930426L09Rik	0.430852	0.0479875	0.231763	0.358315
68281	4930430F08Rik	-0.121418	0.332547	0.498625	-0.746873	1.45492e-07	5.15612e-07	0.0184656	0.906199	0.932945	0.697929	1.79154e-06	7.43907e-06	68281	4930430F08Rik	-0.121418	-0.968995	0.332548	0.498626	-0.868291	-6.26549	3.7166e-10	1.54925e-09	-0.849826	-5.99694	2.01072e-09	4.80854e-09	-0.151896	-1.20049	0.229949	0.30184	7.02691	6.95075	6.47568	6.49033	6.92482	68281	4930430F08Rik	1	0.948577	0.682438	0.689403	0.931677	68281	4930430F08Rik	2.8526	2.06352	0.882712	0.935486
74666	4930432K21Rik	-0.137058	0.603492	0.744247	-1.60055	1.18446e-06	3.86755e-06	-1.92792	0.000476147	0.00111	0.893927	0.128538	0.210537	74666	4930432K21Rik	-0.137058	-0.519383	0.603494	0.744249	-1.73761	-5.36853	7.9379e-08	2.84206e-07	-3.66553	-7.11105	1.15162e-12	3.18315e-12	-2.7716	-7.24452	4.33966e-13	1.59561e-12	4.71501	4.61629	3.63287	2.91581	3.18429	74666	4930432K21Rik	1	0.933867	0.472328	0.287335	0.346106	74666	4930432K21Rik	0.713096	0.657624	0.193328	0.0400303
432745	4930447K03Rik	-0.908626	0.0912199	0.18568	-2.44251	0.00293207	0.00636823	-2.58204	0.0444114	0.0739531	0	1	1	432745	4930447K03Rik	-0.908625	-1.689	0.0912203	0.185681	-3.35114	-4.1993	2.67741e-05	7.86034e-05	-5.93318	-5.27646	1.31704e-07	2.89348e-07	-6.25575	-5.56332	2.64683e-08	7.53469e-08	2.74764	2.19545	1.29826	1.03268	0.975677	432745	4930447K03Rik	1	0.681987	0.36618	0.304612	0.29281	432745	4930447K03Rik	0.688659	0.207094	0.0333398	0
67609	4930453N24Rik	0.336617	5.13154e-05	0.000256627	1.16088	1.66053e-47	2.72919e-46	-0.178702	0.0221902	0.0393201	-0.746006	1.92159e-20	2.50723e-19	67609	4930453N24Rik	0.336617	4.04956	5.13151e-05	0.000256626	1.4975	18.6645	9.63396e-78	2.11266e-76	1.3188	16.2506	2.21213e-59	1.73273e-58	0.572792	6.93926	3.94171e-12	1.3796e-11	8.87471	9.08294	9.8511	9.72838	9.23171	67609	4930453N24Rik	0.508248	0.587165	1	0.918454	0.650943	67609	4930453N24Rik	13.2015	13.6082	26.4445	18.3519
78917	4930455G09Rik	-0.045158	0.782735	0.871922	-1.75407	8.55762e-16	5.11697e-15	1.03485	1.06925e-05	3.03599e-05	1.1011	3.62735e-09	2.00954e-08	78917	4930455G09Rik	-0.0451577	-0.275756	0.782736	0.871923	-1.79922	-8.38461	5.08959e-17	2.92438e-16	-0.764371	-4.11174	3.92691e-05	7.42556e-05	0.336726	2.1038	0.0353957	0.0556227	6.09663	6.05738	5.0474	5.61347	6.31963	78917	4930455G09Rik	0.856779	0.833785	0.414019	0.612947	1	78917	4930455G09Rik	6.5486	3.9386	1.26814	2.70872
321014	4930473A02Rik	0.0333515	0.872962	0.926637	-0.925864	0.000101444	0.000267384	-0.51789	0.0694843	0.11012	-0.418212	0.179175	0.277066	321014	4930473A02Rik	0.0333519	0.159899	0.872961	0.923887	-0.892512	-3.80539	0.000141578	0.000386647	-1.4104	-5.40187	6.59506e-08	1.47185e-07	-1.82861	-6.88514	5.77314e-12	2.00566e-11	5.3426	5.35687	4.79122	4.50709	4.28602	321014	4930473A02Rik	0.990157	1	0.675649	0.554869	0.476037	321014	4930473A02Rik	1.86808	1.64482	0.586629	0.33066
74931	4930481A15Rik	-0.642017	0.00866321	0.0263195	-1.41152	7.25537e-07	2.42093e-06	-0.842603	0.0169497	0.0307457	0.0849431	0.819126	0.880456	74931	4930481A15Rik	-0.642017	-2.62506	0.00866326	0.0263197	-2.05354	-7.39353	1.42983e-13	7.05881e-13	-2.89614	-9.0101	2.05868e-19	7.09154e-19	-2.8112	-9.33406	1.01891e-20	4.97068e-20	5.96887	5.51421	4.64917	4.22782	4.24222	74931	4930481A15Rik	1	0.729685	0.40062	0.299152	0.302153	74931	4930481A15Rik	1.50316	0.558692	0.228946	0.110612
74953	4930483K19Rik	-0.384244	0.227901	0.378509	-0.321995	0.383377	0.483177	1.576	4.60955e-06	1.35718e-05	0.518437	0.0516386	0.0970076	74953	4930483K19Rik	-0.384243	-1.20578	0.227901	0.37851	-0.706238	-2.03423	0.0419281	0.0819082	0.869767	3.01179	0.00259713	0.00424612	1.3882	5.1298	2.90055e-07	7.72823e-07	4.04339	3.84321	3.65664	4.54006	4.86742	74953	4930483K19Rik	0.564864	0.491679	0.432034	0.796995	1	74953	4930483K19Rik	0.718861	0.49	0.306257	0.753273
214639	4930486L24Rik	-0.204303	0.422177	0.5879	-0.0438945	0.871387	0.906394	1.52279	2.07378e-09	8.1477e-09	-0.512304	0.0265032	0.0540796	214639	4930486L24Rik	-0.204303	-0.802649	0.422178	0.587902	-0.248197	-0.949861	0.342183	0.527003	1.27459	5.39248	6.94909e-08	1.54871e-07	0.762285	3.19265	0.00140974	0.00270882	5.14979	5.02434	4.98127	5.95682	5.61151	214639	4930486L24Rik	0.57156	0.523958	0.508547	1	0.787141	214639	4930486L24Rik	1.16578	0.571306	1.00335	1.76936
74992	4930487H11Rik	3.32771	1.62604e-22	3.18107e-21	-0.418019	0.103842	0.161521	0.399132	0.127841	0.18836	-1.50461	1.11186e-07	5.30078e-07	74992	4930487H11Rik	3.32771	9.7628	1.626e-22	3.18098e-21	2.90969	8.38018	5.28476e-17	3.02994e-16	3.30882	9.59722	8.21287e-22	3.0423e-21	1.80421	4.96202	6.97633e-07	1.80583e-06	3.8066	5.57606	5.3145	5.56807	4.646	74992	4930487H11Rik	0.293317	1	0.834183	0.994472	0.524834	74992	4930487H11Rik	0.397421	2.98782	1.3853	1.7104
269033	4930503L19Rik	-0.403353	0.0590196	0.131903	0.801348	0.000179594	0.000459853	1.42325	1.46559e-11	6.66975e-11	-1.10668	1.36676e-07	6.46175e-07	269033	4930503L19Rik	-0.403352	-1.88804	0.05902	0.131904	0.397996	1.87552	0.0607216	0.114934	1.82125	8.65082	5.11287e-18	1.69093e-17	0.714565	3.38	0.000724862	0.00144218	8.64821	8.38694	8.89086	9.87505	9.10432	269033	4930503L19Rik	0.427251	0.35648	0.505509	1	0.586121	269033	4930503L19Rik	9.19117	5.89835	4.97584	12.9715
75111	4930512H18Rik	-0.0849229	0.781618	0.871321	3.31313	4.29469e-36	5.29949e-35	0.57561	0.00216499	0.00457789	-0.772102	4.09372e-05	0.000141488	75111	4930512H18Rik	-0.0849225	-0.277209	0.781619	0.871323	3.22821	13.136	2.04712e-39	2.34975e-38	3.80382	15.6153	5.72981e-55	4.17287e-54	3.03171	12.3168	7.35938e-35	5.18688e-34	4.73546	4.71581	6.60399	7.01965	6.48705	75111	4930512H18Rik	0.2053	0.202523	0.749676	1	0.691306	75111	4930512H18Rik	0.333313	0.310248	3.34257	3.20757
319960	4930513N10Rik	-0.372643	0.272423	0.430869	0.0222584	0.951559	0.964521	0.60501	0.0925026	0.141914	-0.325495	0.345503	0.468314	319960	4930513N10Rik	-0.372642	-1.0975	0.272424	0.430868	-0.350384	-1.00871	0.313113	0.489998	0.254626	0.766533	0.443359	0.504933	-0.0708692	-0.213288	0.831102	0.873922	4.05527	3.83122	3.87443	4.19082	4.02585	319960	4930513N10Rik	0.910326	0.779379	0.803077	1	0.891945	319960	4930513N10Rik	0.342622	0.190803	0.122868	0.225577
67642	4930515G01Rik	-0.323391	0.235247	0.387084	0.152146	0.596069	0.683002	-0.422911	0.1684	0.239182	0.766544	0.00992109	0.0223421	67642	4930515G01Rik	-0.32339	-1.18695	0.235247	0.387084	-0.171244	-0.624275	0.532447	0.750439	-0.594155	-2.02467	0.0429013	0.0603864	0.17239	0.654568	0.512746	0.598173	4.84376	4.63637	4.73492	4.51641	4.94618	67642	4930515G01Rik	0.931474	0.80675	0.863784	0.742381	1	67642	4930515G01Rik	1.45006	1.14004	0.5506	0.452226
74704	4930518I15Rik	-2.9648	7.88584e-15	1.03068e-13	4.2816	9.18772e-30	9.44404e-29	0.0998835	0.723753	0.791694	-0.85712	0.00276926	0.00705347	74704	4930518I15Rik	-2.9648	-7.7694	7.88588e-15	1.03068e-13	1.3168	4.58597	4.51873e-06	1.41829e-05	1.41669	4.92613	8.38754e-07	1.76711e-06	0.559567	1.92339	0.0544305	0.0823643	5.87938	4.46701	6.71291	6.78788	6.2416	74704	4930518I15Rik	0.532738	0.200147	0.949365	1	0.684783	74704	4930518I15Rik	1.78457	0.171535	4.44998	2.14995
75116	4930520O04Rik	-1.76844	0.00011912	0.000560897	0.658136	0.19625	0.278009	0.618443	0.183782	0.257765	-0.2936	0.508407	0.631356	75116	4930520O04Rik	-1.76844	-3.84793	0.000119121	0.000560895	-1.1103	-2.57034	0.0101599	0.0220629	-0.491857	-1.19895	0.230545	0.282867	-0.785457	-1.9206	0.0547819	0.082797	3.71977	2.85853	3.10693	3.44004	3.26327	75116	4930520O04Rik	1	0.550478	0.65391	0.823746	0.728755	75116	4930520O04Rik	1.16202	0.198871	0.137211	0.291684
67647	4930523C07Rik	0.455565	0.00222396	0.00794464	0.527274	0.000290862	0.000727433	-1.83699	6.85794e-27	6.86056e-26	-1.83755	5.0866e-14	4.24151e-13	67647	4930523C07Rik	0.455566	3.05857	0.00222393	0.00794452	0.98284	6.70108	2.06884e-11	9.22657e-11	-0.854146	-4.90831	9.18626e-07	1.93109e-06	-2.6917	-11.8258	2.87034e-32	1.91162e-31	6.51908	6.8229	7.18873	5.96882	5.03598	67647	4930523C07Rik	0.628659	0.776022	1	0.429308	0.224882	67647	4930523C07Rik	0.857726	0.787035	0.977429	0.222227
75135	4930526I15Rik	0.261718	0.0225509	0.0597948	-0.423639	0.000356078	0.000880712	0.221376	0.0694193	0.110028	0.122276	0.30486	0.424802	75135	4930526I15Rik	0.261718	2.28096	0.0225508	0.0597946	-0.161921	-1.3679	0.171345	0.291214	0.0594549	0.503298	0.614755	0.669124	0.181731	1.57296	0.115729	0.163637	8.10028	8.26675	7.99553	8.13858	8.21438	75135	4930526I15Rik	0.891024	1	0.828621	0.914992	0.964353	75135	4930526I15Rik	9.96526	8.7516	6.46106	5.99563
75138	4930526L06Rik	0.146606	0.690999	0.809905	-0.503272	0.20476	0.288063	-0.922753	0.0537976	0.0877214	-0.125508	0.808921	0.873778	75138	4930526L06Rik	0.146607	0.397502	0.690998	0.809906	-0.356665	-0.908043	0.363856	0.554657	-1.27942	-2.80885	0.00497193	0.00791069	-1.40493	-3.18353	0.0014549	0.00279104	3.70845	3.78285	3.48128	3.04966	3.00848	75138	4930526L06Rik	0.949732	1	0.811365	0.601571	0.584642	75138	4930526L06Rik	1.01128	0.873889	0.202588	0.065252
75166	4930533B01Rik	-0.6117	0.351051	0.518003	0.927863	0.166416	0.241724	0.259772	0.665814	0.74181	0.43844	0.4271	0.552841	75166	4930533B01Rik	-0.611699	-0.932552	0.351051	0.518004	0.316165	0.535097	0.592583	0.814658	0.575936	0.984146	0.325044	0.385197	1.01438	1.87642	0.0605972	0.0907772	1.98098	1.77515	2.09534	2.20377	2.38881	75166	4930533B01Rik	0.753757	0.653536	0.815938	0.879624	1	75166	4930533B01Rik	0.207401	0.173249	0.100408	0.161703
319587	4930539J05Rik	0.64256	6.39067e-06	3.66226e-05	0.739686	4.42754e-08	1.63902e-07	0.809982	2.10415e-10	8.89251e-10	-0.744091	3.65137e-09	2.02211e-08	319587	4930539J05Rik	0.64256	4.51304	6.39063e-06	3.66224e-05	1.38225	9.98379	1.79471e-23	1.31674e-22	2.19223	16.2227	3.48708e-59	2.72474e-58	1.44814	10.5538	4.8779e-26	2.7823e-25	6.84871	7.22266	7.69167	8.24771	7.74383	319587	4930539J05Rik	0.379194	0.491393	0.680166	1	0.705208	319587	4930539J05Rik	7.82523	10.0546	11.2963	19.6343
75286	4930549G23Rik	0.45784	0.404572	0.57154	1.54114	0.00144433	0.00328174	-0.658851	0.147823	0.213768	-0.57204	0.254695	0.369046	75286	4930549G23Rik	0.457841	0.833486	0.404571	0.571541	1.99898	4.04995	5.12289e-05	0.000146666	1.34013	2.55463	0.0106301	0.0162892	0.768089	1.42986	0.152756	0.210016	2.36245	2.5292	3.28708	2.94809	2.68171	75286	4930549G23Rik	0.526815	0.591364	1	0.790596	0.657303	75286	4930549G23Rik	0.367957	0.307368	0.831311	0.401637
75311	4930550C14Rik	-0.27434	0.581459	0.725131	-2.16973	0.00162033	0.00365674	-1.25149	0.237715	0.321431	-0.32379	0.795725	0.865075	75311	4930550C14Rik	-0.274338	-0.551253	0.581461	0.725133	-2.44407	-3.61516	0.000300159	0.000793415	-3.69556	-3.90042	9.60268e-05	0.000176494	-4.01935	-4.24142	2.2211e-05	5.12658e-05	2.76282	2.5703	1.6874	1.479	1.38922	75311	4930550C14Rik	1	0.875075	0.474534	0.410708	0.385928	75311	4930550C14Rik	0.488825	0.144118	0.0835247	0
77594	4930552P12Rik	-0.581025	0.125573	0.239751	0.891727	0.0210694	0.038797	0.184029	0.606966	0.690909	-0.540884	0.13941	0.225143	77594	4930552P12Rik	-0.581025	-1.53179	0.125573	0.239752	0.310702	0.888038	0.37452	0.567687	0.494732	1.41391	0.157387	0.200403	-0.0461526	-0.128806	0.897511	0.922237	3.63076	3.35511	3.79693	3.92107	3.62549	77594	4930552P12Rik	0.817727	0.675509	0.917553	1	0.814744	77594	4930552P12Rik	0.199507	0.171417	0.220769	0.199991
100504653	4930555A03Rik	-0.651969	0.0214795	0.0574713	-2.81004	8.42521e-12	4.01463e-11	-0.414266	0.449425	0.545746	1.357	0.00666471	0.0156772	100504653	4930555A03Rik	-0.651968	-2.29945	0.0214795	0.0574713	-3.46201	-8.56136	1.11547e-17	6.60232e-17	-3.87627	-8.42965	3.46693e-17	1.11137e-16	-2.51928	-7.47061	7.98265e-14	3.02498e-13	5.36754	4.88897	3.38293	3.22894	3.77491	100504653	4930555A03Rik	1	0.71769	0.252681	0.227101	0.331567	100504653	4930555A03Rik	1.57502	0.563859	0.0907749	0.0175427
75323	4930558J18Rik	-0.533643	0.241099	0.394442	-0.718668	0.165704	0.240957	-2.84284	0.00299905	0.00618488	1.23334	0.232542	0.342843	75323	4930558J18Rik	-0.533642	-1.17224	0.2411	0.394444	-1.25231	-2.51124	0.0120306	0.0258426	-4.09515	-4.42518	9.63618e-06	1.90203e-05	-2.86181	-4.52866	5.93584e-06	1.43574e-05	3.29458	2.95941	2.58286	1.85555	2.03173	75323	4930558J18Rik	1	0.79269	0.610591	0.368815	0.416718	75323	4930558J18Rik	0.381346	0.121629	0.0671345	0.0162176
75258	4930563M21Rik	-2.31672	0.00747604	0.0231443	-0.305854	0.781687	0.838128	-0.78652	0.548401	0.637599	1.39702	0.254704	0.369046	75258	4930563M21Rik	-2.31672	-2.67486	0.00747606	0.0231444	-2.62258	-2.74774	0.00600076	0.0134947	-3.4091	-3.05259	0.00226873	0.00373122	-2.01208	-2.40908	0.0159928	0.0266115	1.60754	0.817122	0.765417	0.67529	0.876038	75258	4930563M21Rik	1	0.578175	0.557821	0.52404	0.602276	75258	4930563M21Rik	0.404196	0.135056	0.0434849	0.0420183
78049	4930573O16Rik	1.44672	0.294172	0.456122	0.60428	0.615762	0.700531	-1.71802	0.210925	0.290895	-0.324236	0.834478	0.890521	78049	4930573O16Rik	1.44671	1.04901	0.294172	0.456123	2.051	1.52216	0.12797	0.224453	0.332978	0.217756	0.827619	0.856557	0.00874174	0.00571912	0.995437	0.996345	-0.241145	-0.0407705	0.0958936	-0.202607	-0.243965	78049	4930573O16Rik	0.791665	0.90962	1	0.813097	0.790119	78049	4930573O16Rik	0.174787	0.262811	0.338477	0.0817654
75913	4930579G18Rik	-0.251748	0.33214	0.498462	0.280484	0.290708	0.38692	0.785	0.00234466	0.0049253	-0.278188	0.267171	0.383477	75913	4930579G18Rik	-0.251747	-0.969811	0.332141	0.49846	0.0287371	0.111048	0.911578	0.975197	0.813737	3.22996	0.00123807	0.0020883	0.535548	2.12918	0.0332396	0.0525404	5.81066	5.68012	5.84387	6.35729	6.1523	75913	4930579G18Rik	0.684615	0.625391	0.700559	1	0.867546	75913	4930579G18Rik	2.58066	1.26902	0.990062	2.02723
75939	4930579G24Rik	-0.108245	0.335335	0.501874	-1.7332	1.4875e-41	2.12833e-40	-2.29101	2.98322e-29	3.29056e-28	1.33013	4.07426e-10	2.46191e-09	75939	4930579G24Rik	-0.108245	-0.963423	0.335335	0.501873	-1.84145	-14.4871	1.46173e-47	1.97075e-46	-4.13245	-21.2579	2.78363e-100	3.54246e-99	-2.80232	-19.9107	3.28827e-88	5.9117e-87	8.21871	8.13882	6.95854	5.73226	6.36626	75939	4930579G24Rik	1	0.946128	0.417494	0.178445	0.276921	75939	4930579G24Rik	10.3819	7.36622	1.90556	0.304068
75881	4930579K19Rik	-0.926402	0.0173585	0.0478835	-0.427831	0.346432	0.446002	0.723409	0.114722	0.171706	-0.182401	0.669159	0.767944	75881	4930579K19Rik	-0.926401	-2.37902	0.0173586	0.0478838	-1.35423	-3.2021	0.00136431	0.00333943	-0.630823	-1.59948	0.109713	0.143859	-0.813224	-2.0943	0.0362334	0.0568468	3.92598	3.40448	3.21046	3.56437	3.46862	75881	4930579K19Rik	1	0.696646	0.608986	0.778297	0.728318	75881	4930579K19Rik	0.710149	0.278552	0.298958	0.317764
78934	4930581F22Rik	-0.877923	0.00121366	0.0046589	0.679858	0.0185793	0.0346138	1.26959	3.16589e-07	1.03719e-06	-0.495548	0.0270834	0.0551607	78934	4930581F22Rik	-0.877923	-3.23565	0.00121367	0.00465892	-0.198065	-0.778899	0.436039	0.643106	1.07152	4.70624	2.52322e-06	5.16371e-06	0.575972	2.49485	0.012601	0.0212946	4.7778	4.29495	4.6728	5.44989	5.12752	78934	4930581F22Rik	0.627596	0.449084	0.58354	1	0.799755	78934	4930581F22Rik	0.533094	0.163281	0.286761	0.70658
75879	4930589L23Rik	-0.13034	0.563243	0.710161	-1.9838	1.92082e-09	7.81068e-09	1.92489	1.36494e-08	5.0303e-08	0.0724208	0.770155	0.847369	75879	4930589L23Rik	-0.13034	-0.57803	0.563244	0.710163	-2.11414	-6.52096	6.98589e-11	3.02646e-10	-0.18925	-0.795374	0.426396	0.4888	-0.116829	-0.514158	0.607141	0.684801	4.95524	4.86145	3.85656	4.82485	4.8752	75879	4930589L23Rik	1	0.937054	0.466944	0.913584	0.946027	75879	4930589L23Rik	1.17347	0.705774	0.176745	0.512353
77633	4930594C11Rik	0.991442	0.0115003	0.0335994	0.628439	0.0763454	0.123081	0.08119	0.814222	0.862585	-1.0413	0.0052223	0.0125601	77633	4930594C11Rik	0.991443	2.52712	0.0115002	0.0335992	1.61988	4.24461	2.18971e-05	6.48999e-05	1.70107	4.42824	9.5007e-06	1.87667e-05	0.659772	1.62288	0.104615	0.149553	3.33099	3.81049	4.15954	4.23505	3.65495	77633	4930594C11Rik	0.534383	0.745068	0.949009	1	0.668919	77633	4930594C11Rik	0.180751	0.116476	0.41253	0.193269
75373	4930597O21Rik	0.288456	0.440413	0.605316	1.81701	1.1174e-07	3.99972e-07	0.228025	0.455879	0.552334	-0.29886	0.3272	0.448733	75373	4930597O21Rik	0.288457	0.771498	0.440412	0.605315	2.10547	6.17147	6.76578e-10	2.77368e-09	2.33349	6.84892	7.44073e-12	1.98927e-11	2.03463	5.97619	2.2842e-09	6.89577e-09	4.13322	4.27868	5.27864	5.45823	5.27999	75373	4930597O21Rik	0.399146	0.441489	0.882952	1	0.883777	75373	4930597O21Rik	0.326523	0.414589	0.990624	0.957216
75379	4930599N23Rik	-0.405563	0.0789323	0.166312	1.94954	8.00954e-20	5.72746e-19	0.912692	9.56141e-09	3.57579e-08	-0.738068	1.73337e-06	7.20733e-06	75379	4930599N23Rik	-0.405562	-1.75691	0.0789325	0.166312	1.54398	8.15745	3.42184e-16	1.89269e-15	2.45667	13.5598	6.93342e-42	4.01299e-41	1.7186	9.27286	1.81216e-20	8.74963e-20	5.13668	4.93725	6.05899	6.68536	6.17947	75379	4930599N23Rik	0.341824	0.297691	0.647807	1	0.704226	75379	4930599N23Rik	1.57636	0.769817	2.46559	4.00855
70942	4931403E22Rik	-0.691218	0.509296	0.666387	-1.73614	0.191746	0.272292	-1.23295	0.438847	0.535386	1.0263	0.523133	0.642249	70942	4931403E22Rik	-0.691216	-0.659933	0.509297	0.666388	-2.42735	-1.89835	0.0576499	0.109695	-3.66031	-2.67891	0.00738614	0.0115293	-2.63401	-2.03003	0.0423533	0.0655297	0.542982	0.339445	0.0129871	-0.1112	-0.00221846	70942	4931403E22Rik	1	0.868419	0.692557	0.635436	0.685296	70942	4931403E22Rik	0.266237	0.160126	0.0515569	0
70984	4931406C07Rik	-0.101253	0.194248	0.335594	-0.34903	1.46376e-05	4.28161e-05	-0.152638	0.067309	0.106996	0.0563791	0.498467	0.621481	70984	4931406C07Rik	-0.101253	-1.29811	0.194249	0.335593	-0.450283	-5.65194	1.58649e-08	5.95412e-08	-0.602921	-7.44481	9.70876e-14	2.78063e-13	-0.546542	-6.87242	6.31199e-12	2.1864e-11	9.79159	9.7233	9.49389	9.39711	9.43304	70984	4931406C07Rik	1	0.953768	0.813551	0.760768	0.779952	70984	4931406C07Rik	15.9292	10.8244	6.57376	5.98366
77592	4931406H21Rik	1.15929	0.00440693	0.0145768	-1.74455	0.000219217	0.000556768	0.731819	0.157639	0.225757	0.749556	0.0916508	0.157955	77592	4931406H21Rik	1.15929	2.84746	0.0044069	0.0145767	-0.585257	-1.18518	0.235947	0.384798	0.146562	0.318931	0.749778	0.789259	0.896118	2.15346	0.0312828	0.0496336	3.14151	3.73314	2.92142	3.19691	3.61245	77592	4931406H21Rik	0.663594	1	0.569703	0.689573	0.919751	77592	4931406H21Rik	0.156733	0.221802	0.0535614	0.0690068
233103	4931406P16Rik	-0.0138869	0.978712	0.991398	1.10624	0.0327133	0.0577449	0.881526	0.0847436	0.131358	-0.799993	0.117144	0.194452	233103	4931406P16Rik	-0.0138847	-0.0266791	0.978716	0.98846	1.09235	2.1172	0.0342431	0.0679928	1.97388	3.84129	0.000122387	0.000223183	1.17389	2.2788	0.0226792	0.0368031	5.96301	5.91905	6.58078	7.23148	6.66446	233103	4931406P16Rik	0.415101	0.402644	0.636972	1	0.675013	233103	4931406P16Rik	0.796143	0.632306	0.320207	0.848006
74359	4931414P19Rik	-0.575943	4.57948e-06	2.68152e-05	0.418684	0.00165981	0.00373886	0.845768	6.58728e-12	3.06171e-11	-0.352909	0.00230473	0.00596249	74359	4931414P19Rik	-0.575943	-4.58318	4.5795e-06	2.68153e-05	-0.157259	-1.28085	0.200248	0.33314	0.688509	5.98265	2.19541e-09	5.24477e-09	0.3356	2.9088	0.00362823	0.00661909	7.00336	6.64684	6.90282	7.45553	7.22268	74359	4931414P19Rik	0.730941	0.570901	0.68174	1	0.850952	74359	4931414P19Rik	2.53181	1.19998	1.30566	1.87956
70986	4931422A03Rik	-2.55122	0.00700634	0.0218803	1.58822	0.118866	0.181525	0.999376	0.198688	0.275836	-0.96176	0.206748	0.311096	70986	4931422A03Rik	-2.55121	-2.69654	0.00700636	0.0218804	-0.962997	-1.29146	0.196545	0.327867	0.0363793	0.0535772	0.957272	0.966047	-0.925381	-1.26912	0.204397	0.272408	1.83146	1.13191	1.44603	1.81109	1.46514	70986	4931422A03Rik	1	0.615764	0.765553	0.985981	0.775757	70986	4931422A03Rik	0.360405	0.0833703	0.0536867	0.103752
74356	4931428F04Rik	0.124226	0.578715	0.723358	-0.0632863	0.784261	0.840118	-0.438712	0.0778539	0.121713	0.444462	0.0713772	0.12785	74356	4931428F04Rik	0.124226	0.555265	0.578714	0.723357	0.0609399	0.266788	0.789632	0.964684	-0.377772	-1.56159	0.118384	0.154285	0.0666901	0.295215	0.76783	0.822693	5.49733	5.55835	5.53242	5.27681	5.5374	74356	4931428F04Rik	0.958587	1	0.982186	0.822713	0.985587	74356	4931428F04Rik	0.700773	0.622176	0.329569	0.262257
74364	4931431C16Rik	-1.66605	0.00556222	0.0178471	0.410467	0.528838	0.623124	-0.581613	0.398615	0.495616	0.0680121	0.923468	0.950523	74364	4931431C16Rik	-1.66605	-2.77253	0.00556227	0.0178473	-1.25558	-2.12595	0.0335071	0.0666533	-1.8372	-2.86591	0.00415813	0.00667735	-1.76918	-2.88813	0.00387546	0.00704278	3.21403	2.437	2.5722	2.3997	2.39541	74364	4931431C16Rik	1	0.58357	0.640901	0.568676	0.566986	74364	4931431C16Rik	0.390156	0.0391093	0.0503693	0.0365029
71004	4931440P22Rik	-0.190567	0.25846	0.414928	1.37726	2.24184e-17	1.43741e-16	-0.584947	0.000183352	0.00045186	-0.716444	2.62938e-05	9.34063e-05	71004	4931440P22Rik	-0.190566	-1.13004	0.258461	0.41493	1.18669	7.67655	1.63425e-14	8.3742e-14	0.601743	3.69534	0.000219593	0.0003923	-0.1147	-0.679402	0.496883	0.582631	6.17279	6.05474	6.93923	6.55078	6.10298	71004	4931440P22Rik	0.587868	0.541681	1	0.76395	0.560097	71004	4931440P22Rik	1.89218	0.938785	2.23925	1.25174
74366	4932422M17Rik	-2.39235	1.93907e-24	4.12536e-23	0.707824	0.00514287	0.0106832	1.49373	7.44613e-11	3.24201e-10	-0.0337567	0.873421	0.915058	74366	4932422M17Rik	-2.39235	-10.2022	1.93909e-24	4.12541e-23	-1.68452	-7.49998	6.38267e-14	3.20037e-13	-0.190792	-0.914078	0.360676	0.422809	-0.224548	-1.0865	0.277257	0.35543	6.9991	5.56562	5.93262	6.88616	6.8516	74366	4932422M17Rik	1	0.370235	0.477482	0.924699	0.902812	74366	4932422M17Rik	3.51401	0.453385	0.348106	1.39972
229227	4932438A13Rik	0.133061	0.404491	0.57148	0.497107	0.00183451	0.00410881	1.88376	1.34562e-32	1.66831e-31	-1.34485	1.69961e-17	1.84643e-16	229227	4932438A13Rik	0.133062	0.83363	0.404489	0.571478	0.630169	3.95437	7.67359e-05	0.000215769	2.51393	15.8592	1.21365e-56	9.08245e-56	1.16909	7.35726	1.8772e-13	7.01975e-13	10.2208	10.2935	10.607	11.9064	10.9637	229227	4932438A13Rik	0.310869	0.326949	0.406295	1	0.520256	229227	4932438A13Rik	3.65255	3.14726	2.8167	8.32644
319216	4932441J04Rik	0.844712	0.144462	0.26762	0.896875	0.0901896	0.142588	-0.480912	0.363202	0.458808	-0.350216	0.526815	0.645839	319216	4932441J04Rik	0.844713	1.45938	0.144461	0.267621	1.74159	3.1299	0.00174868	0.00422863	1.26068	2.17889	0.0293397	0.0423661	0.91046	1.5705	0.116299	0.164335	2.49305	2.78659	3.25823	3.03618	2.85107	319216	4932441J04Rik	0.588379	0.721143	1	0.857348	0.754107	319216	4932441J04Rik	0.195974	0.687556	0.426942	0.275029
66752	4933404O12Rik	-0.491968	0.000646341	0.00262478	-0.92072	2.13115e-08	8.08961e-08	-0.590293	0.00227703	0.00479645	-0.0506146	0.802188	0.86942	66752	4933404O12Rik	-0.491968	-3.41138	0.000646343	0.00262478	-1.41269	-8.86629	7.56234e-19	4.693e-18	-2.00298	-11.3319	9.12395e-30	4.13097e-29	-2.0536	-12.0955	1.11571e-33	7.67281e-33	7.09784	6.75276	6.16481	5.82778	5.78541	66752	4933404O12Rik	1	0.787268	0.523758	0.414644	0.402644	66752	4933404O12Rik	3.03727	1.83213	0.511829	0.427507
74396	4933407K13Rik	-1.30547	0.00139274	0.00526375	0.6432	0.139678	0.208461	0.628072	0.122636	0.181954	-0.736908	0.0693712	0.124942	74396	4933407K13Rik	-1.30547	-3.19615	0.00139275	0.00526378	-0.662268	-1.6913	0.0907803	0.164848	-0.0341959	-0.0905331	0.927864	0.94175	-0.771104	-1.97468	0.0483039	0.07393	4.22382	3.48217	3.83757	4.18169	3.74314	74396	4933407K13Rik	1	0.598058	0.765117	0.971225	0.716641	74396	4933407K13Rik	0.358221	0.095051	0.0918128	0.157718
271508	4933408B17Rik	-1.10681	0.0347911	0.0864726	-0.45593	0.476216	0.574005	0.52128	0.431354	0.527779	0.456103	0.437111	0.562396	271508	4933408B17Rik	-1.10681	-2.11078	0.0347913	0.0864729	-1.56274	-2.67687	0.00743132	0.016484	-1.04146	-1.88803	0.0590215	0.0812828	-0.58536	-1.17895	0.238419	0.311591	2.8001	2.26929	2.10865	2.31252	2.50293	271508	4933408B17Rik	1	0.692167	0.619233	0.713223	0.813849	271508	4933408B17Rik	0.150589	0.0754756	0.0729043	0.0704456
71086	4933412E12Rik	0.000775761	0.99523	1	2.00698	2.30648e-60	5.02115e-59	1.87123	5.08136e-67	1.67205e-65	-1.08297	1.45269e-24	2.43727e-23	71086	4933412E12Rik	0.000775931	0.00598022	0.995229	0.997491	2.00776	16.8075	2.14916e-63	3.85296e-62	3.87898	33.33	1.42058e-243	5.67986e-242	2.79601	23.826	1.7949e-125	5.02146e-124	7.8065	7.80775	9.00233	10.3312	9.54735	71086	4933412E12Rik	0.173777	0.173928	0.398082	1	0.580816	71086	4933412E12Rik	3.65183	2.9988	11.2869	29.3986
71082	4933416M07Rik	5.37332	2.24052e-27	5.24774e-26	-0.558461	0.0830596	0.132868	-0.311363	0.348643	0.44382	-2.17368	8.34873e-09	4.45906e-08	71082	4933416M07Rik	5.37332	10.8394	2.2404e-27	5.24746e-26	4.81486	9.64867	4.97956e-22	3.4724e-21	4.50349	8.96676	3.05361e-19	1.04672e-18	2.32982	4.39586	1.10334e-05	2.61188e-05	3.4679	6.15016	5.72545	5.54298	4.27775	71082	4933416M07Rik	0.155797	1	0.744987	0.656478	0.273116	71082	4933416M07Rik	0.0936032	2.39262	2.53768	1.22605
71186	4933417D19Rik	-0.841364	0.0470366	0.110287	-0.232315	0.648019	0.727614	2.13862	2.15882e-06	6.55665e-06	-0.433915	0.2077	0.312345	71186	4933417D19Rik	-0.841363	-1.98597	0.0470367	0.110288	-1.07368	-2.33428	0.0195811	0.0406195	1.06494	3.02351	0.0024986	0.00409128	0.631025	1.77376	0.0761023	0.111875	3.29467	2.90097	2.83543	3.89214	3.64245	71186	4933417D19Rik	0.660915	0.503072	0.480728	1	0.841079	71186	4933417D19Rik	0.54989	0.203078	0.140114	0.433244
100504166	4933421O10Rik	-0.196772	0.254358	0.40985	-0.0897324	0.63086	0.713102	0.14	0.469723	0.565266	0.158639	0.392982	0.518537	100504166	4933421O10Rik	-0.196772	-1.13983	0.254358	0.409851	-0.286504	-1.60004	0.10959	0.195429	-0.146504	-0.813501	0.415931	0.478887	0.0121349	0.0711909	0.943246	0.955208	5.84649	5.72657	5.66931	5.75322	5.85245	100504166	4933421O10Rik	0.995879	0.91645	0.880789	0.933535	1	100504166	4933421O10Rik	0.886921	0.555657	0.366764	0.371682
74477	4933427D14Rik	-0.95313	4.88616e-16	6.98845e-15	0.30611	0.0138403	0.0264762	0.723447	1.58729e-09	6.31058e-09	-0.124247	0.279159	0.396602	74477	4933427D14Rik	-0.95313	-8.11429	4.8862e-16	6.9885e-15	-0.64702	-5.54325	2.96911e-08	1.09141e-07	0.076427	0.678205	0.497642	0.558873	-0.0478196	-0.428796	0.668072	0.738114	8.11382	7.50113	7.69255	8.16443	8.08008	74477	4933427D14Rik	0.965527	0.631431	0.721022	1	0.943207	74477	4933427D14Rik	3.62097	1.62142	1.25612	2.10487
100141474	4933428G20Rik	-1.25028	0.00628394	0.0198633	3.21535	3.00744e-13	1.55997e-12	-1.84402	3.90749e-06	1.16071e-05	-0.976113	0.0324521	0.0645813	100141474	4933428G20Rik	-1.25028	-2.73258	0.00628395	0.0198633	1.96507	5.12788	2.9302e-07	1.00855e-06	0.12105	0.28969	0.772053	0.808471	-0.855063	-1.93333	0.0531956	0.0806068	4.01054	3.33964	5.24809	4.09334	3.58584	100141474	4933428G20Rik	0.424093	0.266379	1	0.449145	0.315947	100141474	4933428G20Rik	0.673943	0.100083	1.8368	0.42036
214106	4933430I17Rik	2.00354	1.32519e-15	1.82712e-14	0.265226	0.172184	0.24863	0.630859	0.000683002	0.00155842	1.29062	1.36112e-15	1.27833e-14	214106	4933430I17Rik	2.00354	7.99223	1.32516e-15	1.82708e-14	2.26876	9.07208	1.16771e-19	7.4732e-19	2.89962	11.8753	1.59141e-32	7.66747e-32	4.19024	18.0032	1.83903e-72	2.61244e-71	4.52563	5.5451	5.70737	6.10478	7.01126	214106	4933430I17Rik	0.178547	0.361946	0.405034	0.533487	1	214106	4933430I17Rik	0.21944	0.819878	0.946472	0.98921
71265	4933431G14Rik	-0.84005	0.146841	0.271099	0.379084	0.549888	0.642621	0.959581	0.0963231	0.147028	-0.643239	0.238244	0.349494	71265	4933431G14Rik	-0.840049	-1.45078	0.146841	0.2711	-0.460965	-0.813718	0.415807	0.618505	0.498616	0.96666	0.333714	0.394367	-0.144623	-0.270664	0.786649	0.837891	2.40833	2.08085	2.22184	2.62302	2.32592	71265	4933431G14Rik	0.86173	0.686736	0.757237	1	0.813887	71265	4933431G14Rik	0.212989	0.0640503	0.0412455	0.119564
71264	4933432I03Rik	2.73948	6.21036e-10	5.62236e-09	1.29848	8.54294e-07	2.82831e-06	0.676413	0.00309906	0.00637688	-0.672043	0.00295489	0.00748519	71264	4933432I03Rik	2.73948	6.185	6.21025e-10	5.62226e-09	4.03796	9.45203	3.32338e-21	2.24951e-20	4.71438	11.1449	7.5803e-29	3.35827e-28	4.04233	9.4922	2.26208e-21	1.12727e-20	3.36155	4.42984	5.23346	5.69098	5.22425	71264	4933432I03Rik	0.198963	0.417214	0.728237	1	0.7236	71264	4933432I03Rik	0.167621	0.672096	1.4607	1.88191
71274	4933433G15Rik	3.01347	0.00132236	0.00503129	-1.97057	0.0233413	0.0425364	-1.58081	0.219614	0.301027	1.05609	0.425209	0.550998	71274	4933433G15Rik	3.01347	3.21109	0.00132234	0.00503122	1.0429	0.984796	0.324724	0.504837	-0.537916	-0.402726	0.68715	0.735324	0.518172	0.469638	0.638613	0.712409	0.677862	1.64438	0.891719	0.654544	0.766104	71274	4933433G15Rik	0.511741	1	0.59351	0.503537	0.544019	71274	4933433G15Rik	0	0.278311	0.0298699	0
71226	4933433G19Rik	-0.567335	0.332466	0.498602	0.436619	0.478835	0.576409	-0.874661	0.203341	0.281648	0.354767	0.616942	0.72451	71226	4933433G19Rik	-0.567333	-0.969157	0.332467	0.498603	-0.130714	-0.228598	0.819182	0.974041	-1.00538	-1.52382	0.127554	0.165197	-0.650608	-1.08846	0.276393	0.354488	2.33286	2.06805	2.25462	1.94559	2.05869	71226	4933433G19Rik	1	0.832311	0.947217	0.764576	0.826926	71226	4933433G19Rik	0.368767	0.235234	0.0973799	0.0313652
74473	4933433H22Rik	0.906036	0.269061	0.427069	3.86953	3.25819e-11	1.49578e-10	-0.537937	0.143971	0.208697	-1.22117	0.00349409	0.00872982	74473	4933433H22Rik	0.906036	1.10523	0.269061	0.42707	4.77556	7.07473	1.49737e-12	7.08387e-12	4.23762	6.19485	5.83401e-10	1.43117e-09	3.01646	4.28905	1.79438e-05	4.17387e-05	2.08007	2.30529	4.13788	3.78351	3.11125	74473	4933433H22Rik	0.240181	0.28076	1	0.782214	0.490855	74473	4933433H22Rik	0.0198822	0.0797198	0.712286	0.372035
99650	4933434E20Rik	0.0462357	0.550403	0.699037	-0.0815174	0.300666	0.398115	0.378113	1.71465e-06	5.25237e-06	0.293439	0.000147565	0.000468573	99650	4933434E20Rik	0.0462358	0.597157	0.550403	0.699036	-0.0352816	-0.451193	0.651851	0.871799	0.342831	4.41219	1.02332e-05	2.01542e-05	0.63627	8.32071	8.7438e-17	3.71572e-16	9.92233	9.9513	9.89876	10.1452	10.3394	99650	4933434E20Rik	0.748948	0.764139	0.736809	0.87404	1	99650	4933434E20Rik	22.7889	18.3495	16.0852	16.7437
74476	4933439C10Rik	-0.626322	1.89169e-07	1.32074e-06	-0.891834	1.26149e-11	5.92647e-11	-1.38633	2.38981e-17	1.5211e-16	0.0700009	0.693354	0.78801	74476	4933439C10Rik	-0.626322	-5.20968	1.89165e-07	1.32071e-06	-1.51816	-11.8208	3.04769e-32	2.94185e-31	-2.90449	-18.7883	9.40813e-79	9.35748e-78	-2.83449	-19.444	3.27558e-84	5.54355e-83	8.26418	7.82106	7.21527	6.4041	6.4382	74476	4933439C10Rik	1	0.735544	0.483334	0.275461	0.28205	74476	4933439C10Rik	13.5682	6.40151	3.19263	0.780104
71319	4933439K11Rik	-0.828519	0.046241	0.108671	-1.19353	0.0375924	0.0655757	2.63193	1.18954e-06	3.69577e-06	0.558732	0.112317	0.187723	71319	4933439K11Rik	-0.828519	-1.99319	0.0462411	0.108672	-2.02204	-3.75024	0.000176663	0.0004776	0.609881	1.64868	0.0992131	0.131096	1.16861	3.35948	0.000780888	0.00154655	3.54983	3.13152	2.7278	3.87466	4.2379	71319	4933439K11Rik	0.620686	0.464459	0.351087	0.777417	1	71319	4933439K11Rik	0.755988	0.492573	0.0731987	0.530476
269630	5031425E22Rik	-0.0374222	0.686269	0.805662	-0.207503	0.0314174	0.0556451	-0.245608	0.0156524	0.0285841	-0.214321	0.0387261	0.0755291	269630	5031425E22Rik	-0.0374221	-0.403922	0.68627	0.805663	-0.244925	-2.57866	0.00991845	0.0215811	-0.490533	-5.00364	5.62568e-07	1.19716e-06	-0.704854	-7.25226	4.09876e-13	1.50906e-12	8.5267	8.49988	8.36392	8.20699	8.06951	269630	5031425E22Rik	1	0.981583	0.893301	0.801231	0.728405	269630	5031425E22Rik	7.19487	5.82575	3.88228	2.91481
319684	5031425F14Rik	-0.751858	0.0159781	0.0447119	-3.05069	5.97162e-11	2.68723e-10	-4.27303	0.000128306	0.000321759	2.6337	0.0296839	0.0597188	319684	5031425F14Rik	-0.751857	-2.40941	0.0159781	0.0447119	-3.80254	-8.2893	1.13918e-16	6.42823e-16	-8.07557	-7.61536	2.62967e-14	7.66535e-14	-5.44187	-8.27383	1.29726e-16	5.46477e-16	5.07095	4.51222	2.78606	2.17349	2.37622	319684	5031425F14Rik	1	0.678896	0.205201	0.134207	0.154456	319684	5031425F14Rik	1.52191	0.74099	0.0210513	0
100039684	5031434O11Rik	-0.64518	0.0977529	0.196022	-1.07093	0.0299757	0.0533143	-0.668425	0.293456	0.384674	0.264546	0.685918	0.782171	100039684	5031434O11Rik	-0.645179	-1.65584	0.0977533	0.196021	-1.7161	-3.65552	0.000256666	0.000682356	-2.38453	-4.2606	2.0388e-05	3.93772e-05	-2.11998	-4.29501	1.74684e-05	4.06615e-05	3.40506	3.03659	2.55034	2.31977	2.40091	100039684	5031434O11Rik	1	0.774605	0.552972	0.471297	0.498564	100039684	5031434O11Rik	1.58305	0.396714	0.239499	0.0462845
223739	5031439G07Rik	-0.0615921	0.388937	0.556383	-0.514367	8.01204e-13	4.0606e-12	-0.0256541	0.722279	0.790412	0.581803	6.12634e-16	5.88728e-15	223739	5031439G07Rik	-0.061592	-0.861544	0.388938	0.556384	-0.575959	-8.02822	9.88952e-16	5.35811e-15	-0.601613	-8.374	5.56951e-17	1.7744e-16	-0.0198101	-0.277046	0.781745	0.833833	13.111	13.0703	12.7324	12.7173	13.0977	223739	5031439G07Rik	1	0.972155	0.769169	0.761145	0.990789	223739	5031439G07Rik	85.1838	65.8889	36.3906	34.707
77675	5033406O09Rik	-1.27361	1.30026e-10	1.25266e-09	-1.33923	2.69602e-07	9.33113e-07	0.537616	0.0605488	0.0975843	2.32706	1.27236e-23	2.00103e-22	77675	5033406O09Rik	-1.27361	-6.42714	1.30026e-10	1.25267e-09	-2.61284	-10.6217	2.36202e-26	1.91099e-25	-2.07522	-8.96855	3.00436e-19	1.03028e-18	0.25184	1.39915	0.161768	0.221094	6.37809	5.52807	4.80641	5.0838	6.54969	77675	5033406O09Rik	0.887858	0.492563	0.298691	0.362012	1	77675	5033406O09Rik	2.79781	0.65989	0.278866	0.288709
76000	5033430I15Rik	0.125145	0.719105	0.829462	-1.0553	0.00819934	0.0164238	-1.62352	0.005595	0.0110617	0.527958	0.403589	0.528843	76000	5033430I15Rik	0.125146	0.359657	0.719103	0.82946	-0.930155	-2.3538	0.0185824	0.0386892	-2.55368	-4.62283	3.78538e-06	7.66335e-06	-2.02572	-4.39554	1.10498e-05	2.61537e-05	3.75326	3.79908	3.20082	2.60636	2.74911	76000	5033430I15Rik	0.968734	1	0.660548	0.437476	0.482976	76000	5033430I15Rik	1.28089	1.13581	0.190803	0.138276
71339	5430400D12Rik	-1.92125	0.00164839	0.00610052	0.0595805	0.93405	0.951756	0.375411	0.601731	0.686492	0.555406	0.393621	0.518934	71339	5430400D12Rik	-1.92125	-3.1472	0.0016484	0.00610055	-1.86167	-2.97176	0.002961	0.00694691	-1.48626	-2.43962	0.0147027	0.0221394	-0.93085	-1.7043	0.0883258	0.12824	2.86998	2.01818	2.04874	2.13719	2.32946	71339	5430400D12Rik	1	0.554093	0.565956	0.601739	0.687522	71339	5430400D12Rik	0.294308	0.042145	0.0610638	0.0786726
73183	5430402O13Rik	0.286911	0.52029	0.675465	-0.833528	0.0868104	0.138031	-0.224363	0.680469	0.754496	-0.392582	0.490634	0.614214	73183	5430402O13Rik	0.286912	0.642901	0.520289	0.675462	-0.546616	-1.12508	0.260556	0.419151	-0.770979	-1.51441	0.129923	0.167987	-1.16356	-2.26555	0.0234792	0.0380187	3.30845	3.43654	3.01365	2.94051	2.74379	73183	5430402O13Rik	0.915045	1	0.745927	0.709057	0.618674	73183	5430402O13Rik	0.282576	0.212441	0.307805	0.198283
74487	5430405H02Rik	-0.99868	0.00438827	0.0145245	1.53921	1.13723e-05	3.36602e-05	0.823978	0.00866783	0.0165536	-0.262809	0.389994	0.515528	74487	5430405H02Rik	-0.998679	-2.84881	0.0043883	0.0145246	0.540527	1.68272	0.0924293	0.167582	1.3645	4.34853	1.37051e-05	2.67983e-05	1.1017	3.51723	0.000436074	0.000889341	5.01859	4.45872	5.31844	5.89096	5.71211	74487	5430405H02Rik	0.546249	0.370555	0.67244	1	0.883407	74487	5430405H02Rik	0.895713	0.35442	1.4835	1.30115
71398	5430427O19Rik	1.69512	2.33722e-112	2.09365e-110	0.028439	0.697926	0.771009	-0.428322	8.24914e-09	3.09609e-08	-1.08393	3.08799e-45	1.30668e-43	71398	5430427O19Rik	1.69512	22.5255	2.33713e-112	2.09357e-110	1.72355	22.8435	1.69544e-115	5.62671e-114	1.29523	16.9818	1.12079e-64	9.37762e-64	0.211304	2.71282	0.00667131	0.0117297	9.89069	10.985	11.0045	10.7123	10.0156	71398	5430427O19Rik	0.462083	0.986601	1	0.816687	0.503874	71398	5430427O19Rik	8.80188	22.6944	19.9545	11.5412
71432	5430437J10Rik	0.13293	0.543721	0.694117	-0.210038	0.348871	0.448218	-0.964515	8.3172e-05	0.000213766	-0.69495	0.00983247	0.0221654	71432	5430437J10Rik	0.132931	0.607199	0.543719	0.694115	-0.0771069	-0.346019	0.729329	0.939887	-1.04162	-4.33486	1.45852e-05	2.84673e-05	-1.73657	-6.97122	3.1421e-12	1.10491e-11	6.29515	6.38118	6.24029	5.64205	5.21668	71432	5430437J10Rik	0.942111	1	0.906956	0.599098	0.446119	71432	5430437J10Rik	3.81317	3.45538	2.39249	0.884763
71445	5530601H04Rik	-0.393172	0.00206878	0.00745638	-0.493326	0.000724333	0.00171947	0.0310228	0.845384	0.888572	0.166707	0.278376	0.395857	71445	5530601H04Rik	-0.393172	-3.08018	0.00206879	0.0074564	-0.886498	-6.36334	1.97412e-10	8.33582e-10	-0.855475	-6.0042	1.92276e-09	4.60231e-09	-0.688768	-5.16854	2.35934e-07	6.3231e-07	6.84186	6.58386	6.27251	6.28846	6.39198	71445	5530601H04Rik	1	0.836251	0.673924	0.681415	0.732108	71445	5530601H04Rik	1.72509	1.07002	0.664437	0.51719
70489	5730405O15Rik	-1.43456	0.00213915	0.00767747	-0.492317	0.388972	0.488502	0.31322	0.604932	0.689043	1.20403	0.0220664	0.0459069	70489	5730405O15Rik	-1.43456	-3.0702	0.00213916	0.00767751	-1.92687	-3.70848	0.000208509	0.000559955	-1.61365	-3.1739	0.00150405	0.00251765	-0.409623	-0.965488	0.3343	0.41721	3.5384	2.75906	2.58885	2.69748	3.30499	70489	5730405O15Rik	1	0.582636	0.517794	0.558287	0.850624	70489	5730405O15Rik	1.12282	0.0803939	0.232965	0.112554
67531	5730408K05Rik	-0.672578	0.0128104	0.0368646	-0.21926	0.476968	0.574514	-0.0731574	0.82622	0.872584	0.246092	0.44592	0.570882	67531	5730408K05Rik	-0.672577	-2.48899	0.0128105	0.0368648	-0.891838	-3.10967	0.00187299	0.00451822	-0.964995	-3.23432	0.00121931	0.00205817	-0.718903	-2.61663	0.00888022	0.0153542	4.64179	4.23874	4.10533	4.08896	4.2134	67531	5730408K05Rik	1	0.756257	0.689457	0.681682	0.743088	67531	5730408K05Rik	3.42724	1.85701	1.70406	1.03995
230757	5730409E04Rik	-0.770837	1.61435e-26	3.65808e-25	-0.602416	2.04613e-13	1.06947e-12	-0.148983	0.0986193	0.150051	0.927816	6.84909e-28	1.37322e-26	230757	5730409E04Rik	-0.770837	-10.6572	1.61435e-26	3.65809e-25	-1.37325	-17.5583	5.13956e-69	9.92216e-68	-1.52224	-18.6752	7.88511e-78	7.74206e-77	-0.594419	-8.27227	1.31435e-16	5.53535e-16	9.21948	8.69839	8.31166	8.22329	8.81451	230757	5730409E04Rik	1	0.696846	0.53299	0.501321	0.755253	230757	5730409E04Rik	12.5582	5.55738	3.2329	2.62265
70550	5730416F02Rik	0.443529	0.554105	0.702515	0.219518	0.767205	0.82644	0.154304	0.835824	0.880949	-0.0931412	0.898679	0.933539	70550	5730416F02Rik	0.44353	0.591621	0.554104	0.702514	0.663048	0.883793	0.376808	0.570675	0.817353	1.08584	0.277551	0.334264	0.724211	0.982134	0.326034	0.408372	1.54391	1.6505	1.74635	1.80424	1.76598	70550	5730416F02Rik	0.834902	0.898918	0.960674	1	0.973829	70550	5730416F02Rik	0.0876089	0.131729	0.254483	0.163934
70591	5730455P16Rik	-0.659814	1.45735e-10	1.39611e-09	0.366076	0.000574727	0.0013857	0.0528558	0.618862	0.70169	-0.0270961	0.797189	0.866114	70591	5730455P16Rik	-0.659813	-6.40977	1.45736e-10	1.39611e-09	-0.293737	-2.87616	0.00402552	0.00927233	-0.240881	-2.34162	0.0192004	0.0284589	-0.267977	-2.64577	0.00815043	0.0141743	8.65582	8.22655	8.46195	8.49822	8.47717	70591	5730455P16Rik	1	0.742641	0.874259	0.896518	0.883532	70591	5730455P16Rik	4.94801	2.35811	2.38407	2.02488
70592	5730480H06Rik	-0.626083	0.000900864	0.00356667	-0.079254	0.71011	0.781455	0.395376	0.0664115	0.105805	-0.0414202	0.838856	0.893139	70592	5730480H06Rik	-0.626083	-3.31979	0.000900868	0.00356668	-0.705337	-3.58063	0.00034277	0.000900889	-0.309961	-1.62245	0.104707	0.137731	-0.351381	-1.90842	0.0563368	0.0848935	5.59225	5.21001	5.1486	5.39405	5.37468	70592	5730480H06Rik	1	0.767246	0.735274	0.87164	0.860015	70592	5730480H06Rik	1.9886	0.904211	0.655055	0.767228
74757	5830416I19Rik	-0.731879	0.0214217	0.0573466	-0.901764	0.012769	0.0246129	-2.99947	9.2084e-06	2.63481e-05	-0.948096	0.329508	0.45125	74757	5830416I19Rik	-0.731878	-2.30047	0.0214217	0.0573467	-1.63364	-4.67761	2.90244e-06	9.2697e-06	-4.63311	-7.08319	1.4087e-12	3.87838e-12	-5.5812	-7.14307	9.12665e-13	3.30254e-12	4.7756	4.29313	3.71624	2.60128	2.42116	74757	5830416I19Rik	1	0.715753	0.479845	0.221546	0.195542	74757	5830416I19Rik	1.109	0.501606	0.170236	0.0126534
100302730	5830417I10Rik	-0.401774	0.000368127	0.00157425	-0.728462	1.01772e-08	3.95986e-08	0.701157	8.16742e-08	2.81193e-07	0.56804	1.52611e-06	6.38541e-06	100302730	5830417I10Rik	-0.401774	-3.56194	0.000368129	0.00157426	-1.13024	-9.18299	4.19294e-20	2.73457e-19	-0.42908	-3.67433	0.00023847	0.000424701	0.13896	1.26753	0.204964	0.273075	7.81854	7.55115	7.10343	7.53688	7.90679	100302730	5830417I10Rik	0.940666	0.781523	0.573015	0.773833	1	100302730	5830417I10Rik	1.39991	0.862993	0.406289	0.497503
67765	5830432E09Rik	0.164323	0.293489	0.455395	-0.591101	0.000389842	0.00096044	1.17199	1.36307e-12	6.63814e-12	0.597384	6.58405e-05	0.000220833	67765	5830432E09Rik	0.164324	1.0505	0.293488	0.455394	-0.426777	-2.57964	0.00989027	0.0215269	0.745215	4.80669	1.53451e-06	3.18577e-06	1.3426	8.96321	3.15352e-19	1.46293e-18	6.95107	7.05242	6.6809	7.42757	7.83963	67765	5830432E09Rik	0.540153	0.579462	0.447908	0.751546	1	67765	5830432E09Rik	3.42836	3.365	1.36008	3.47487
641454	5830444B04Rik	-0.872105	0.00249873	0.00883147	0.155052	0.630916	0.713102	0.475582	0.131063	0.192492	-0.600196	0.0558396	0.103918	641454	5830444B04Rik	-0.872105	-3.02349	0.00249874	0.00883151	-0.717053	-2.46123	0.0138461	0.0294555	-0.241472	-0.863171	0.388044	0.450717	-0.841668	-2.89981	0.00373391	0.0068036	4.43839	3.94087	4.01898	4.26099	3.97194	641454	5830444B04Rik	1	0.708323	0.74773	0.884295	0.723741	641454	5830444B04Rik	0.795786	0.314245	0.256841	0.451234
77877	6030458C11Rik	-0.454745	3.97579e-07	2.67227e-06	-0.226339	0.0170194	0.0319693	0.593761	4.16344e-10	1.72199e-09	0.255134	0.00486391	0.0117739	77877	6030458C11Rik	-0.454745	-5.07011	3.97581e-07	2.67229e-06	-0.681084	-7.39198	1.44655e-13	7.1378e-13	-0.0873231	-0.971475	0.331312	0.391932	0.167811	1.91647	0.0553054	0.0835191	9.01843	8.72095	8.58111	8.96076	9.13017	77877	6030458C11Rik	0.925469	0.75303	0.683467	0.889205	1	77877	6030458C11Rik	5.36073	2.77473	2.03217	2.62629
76133	6230400D17Rik	-0.408545	0.21203	0.358445	0.0483316	0.88984	0.919421	0.152506	0.667534	0.743146	0.0156554	0.963967	0.978283	76133	6230400D17Rik	-0.408545	-1.248	0.21203	0.358445	-0.360213	-1.08236	0.279091	0.444672	-0.207707	-0.622119	0.533863	0.593292	-0.192052	-0.593247	0.553016	0.636562	4.41953	4.16868	4.19501	4.29972	4.30199	76133	6230400D17Rik	1	0.8404	0.855878	0.920308	0.921756	76133	6230400D17Rik	0.948077	0.589875	0.696397	0.550564
100504301	6230426M11Rik	-0.787252	0.112091	0.219231	-0.547612	0.332505	0.431929	-0.414839	0.518054	0.609469	0.092172	0.887633	0.925762	100504301	6230426M11Rik	-0.787251	-1.58886	0.112092	0.219232	-1.33486	-2.48992	0.0127773	0.0273371	-1.7497	-3.00659	0.00264193	0.00431455	-1.65753	-3.02042	0.00252422	0.00469404	3.21648	2.85021	2.59174	2.46862	2.48528	100504301	6230426M11Rik	1	0.775782	0.648534	0.595484	0.602402	100504301	6230426M11Rik	1.14099	0.248638	0.0480335	0.0928271
70720	6330407A03Rik	0.561433	0.163272	0.294305	1.84191	1.8725e-06	6.01408e-06	-0.321039	0.393114	0.490136	-0.756219	0.0477708	0.0906869	70720	6330407A03Rik	0.561434	1.39415	0.163271	0.294303	2.40334	6.16353	7.11424e-10	2.91172e-09	2.0823	5.30291	1.13974e-07	2.51324e-07	1.32608	3.35028	0.000807294	0.00159634	4.983	5.26233	6.385	6.21022	5.72801	70720	6330407A03Rik	0.378404	0.459244	1	0.885901	0.634199	70720	6330407A03Rik	0.499892	0.501093	3.42538	1.2412
70730	6330409D20Rik	-2.73515	1.83807e-05	9.89303e-05	0.886166	0.219635	0.305701	-0.74317	0.324334	0.417548	0.350849	0.649678	0.75227	70730	6330409D20Rik	-2.73515	-4.2837	1.83808e-05	9.89309e-05	-1.84899	-3.23277	0.00122596	0.00301604	-2.59216	-3.84406	0.000121016	0.000220783	-2.24131	-3.76207	0.000168512	0.000358282	2.98551	1.73246	2.03374	1.80785	1.88395	70730	6330409D20Rik	1	0.419562	0.516999	0.442071	0.466015	70730	6330409D20Rik	0.731092	0.191178	0.0923325	0.118958
320020	6330415G19Rik	-1.88604	0.000876109	0.00347225	1.10243	0.0715397	0.116049	-0.381144	0.515139	0.606755	1.09455	0.0470198	0.0895053	320020	6330415G19Rik	-1.88604	-3.32756	0.000876114	0.00347227	-0.78361	-1.57435	0.115408	0.204864	-1.16475	-2.1632	0.0305255	0.0439835	-0.0702018	-0.153721	0.87783	0.90796	3.0837	2.26958	2.67439	2.49944	3.03099	320020	6330415G19Rik	1	0.568758	0.752987	0.666992	0.964127	320020	6330415G19Rik	0.306066	0.0219144	0.0635034	0.0818157
69004	6330418K02Rik	-1.14111	4.52898e-05	0.000228432	-0.433913	0.178071	0.255601	0.633493	0.0528988	0.0864445	0.405714	0.172915	0.269069	69004	6330418K02Rik	-1.14111	-4.07869	4.52901e-05	0.000228434	-1.57502	-5.2379	1.62413e-07	5.69176e-07	-0.941527	-3.29672	0.000978198	0.00166429	-0.535813	-1.99764	0.0457556	0.070357	5.3417	4.63658	4.39398	4.7554	4.99302	69004	6330418K02Rik	1	0.61339	0.518451	0.666048	0.785301	69004	6330418K02Rik	2.44808	1.44351	0.836599	0.988026
229613	6330549D23Rik	-0.289226	0.216053	0.363442	-0.60103	0.0243203	0.0442024	-0.141973	0.634541	0.715499	0.65278	0.0207662	0.0434678	229613	6330549D23Rik	-0.289226	-1.23709	0.216054	0.363443	-0.890256	-3.46286	0.000534458	0.00137537	-1.03223	-3.82898	0.000128676	0.000234198	-0.379448	-1.59489	0.110737	0.157403	5.11405	4.91183	4.56889	4.50925	4.87638	229613	6330549D23Rik	1	0.869212	0.685315	0.657566	0.848116	229613	6330549D23Rik	0.679186	0.529525	0.219208	0.176513
381933	6430531B16Rik	0.727116	0.0154558	0.0435525	-1.92545	1.55655e-07	5.50509e-07	-0.690769	0.155278	0.222905	0.158576	0.75395	0.835855	381933	6430531B16Rik	0.727117	2.42152	0.0154557	0.0435523	-1.19833	-3.2103	0.00132598	0.00325122	-1.8891	-4.31342	1.60747e-05	3.12796e-05	-1.73053	-4.33819	1.43658e-05	3.36875e-05	4.03675	4.49969	3.36832	3.07829	3.13707	381933	6430531B16Rik	0.725504	1	0.456479	0.373348	0.388876	381933	6430531B16Rik	1.01101	1.07486	0.207649	0.229309
234797	6430548M08Rik	-0.24738	0.0892792	0.182807	-2.17992	7.42713e-46	1.16693e-44	-1.03715	1.29835e-09	5.19206e-09	2.5013	1.57335e-51	8.82806e-50	234797	6430548M08Rik	-0.24738	-1.69921	0.0892796	0.182808	-2.4273	-15.8836	8.22613e-57	1.33379e-55	-3.46445	-21.1254	4.65096e-99	5.87696e-98	-0.963145	-6.55814	5.44815e-11	1.79639e-10	9.73489	9.5592	8.12692	7.57119	9.05778	234797	6430548M08Rik	1	0.885346	0.328061	0.223184	0.62542	234797	6430548M08Rik	8.75646	5.64551	0.887855	0.518984
320095	6430550D23Rik	-0.632477	0.184103	0.322055	-0.615405	0.248167	0.339246	-0.273759	0.643273	0.722655	0.217852	0.710686	0.801523	320095	6430550D23Rik	-0.632476	-1.32822	0.184104	0.322055	-1.24788	-2.43691	0.0148135	0.0313755	-1.52164	-2.81482	0.00488038	0.0077735	-1.30379	-2.56758	0.010241	0.0175101	3.57632	3.19116	2.95829	2.83735	2.93279	320095	6430550D23Rik	1	0.765691	0.651557	0.599167	0.640142	320095	6430550D23Rik	0.541389	0.0723586	0.0698935	0.118189
235599	6430571L13Rik	0.680428	0.282399	0.44249	1.68638	0.00271911	0.00593756	-5.48427	1.07455e-06	3.35243e-06	0.955995	0.490935	0.614321	235599	6430571L13Rik	0.680429	1.07495	0.282398	0.442489	2.36681	4.04651	5.19858e-05	0.000148704	-3.11745	-2.68387	0.00727746	0.0113696	-2.16146	-2.15863	0.0308788	0.0490827	1.82314	2.08121	3.00635	1.28453	1.33671	235599	6430571L13Rik	0.44037	0.52663	1	0.303167	0.314333	235599	6430571L13Rik	0.0278756	0.0279425	0.20243	0
76220	6530402F18Rik	0.154761	0.212518	0.358944	2.0862	7.17505e-75	1.98975e-73	0.931522	2.84627e-21	2.22819e-20	-0.0650499	0.496115	0.619406	76220	6530402F18Rik	0.154762	1.24667	0.212518	0.358943	2.24097	20.0058	4.89862e-89	1.23845e-87	3.17249	28.8312	8.72789e-183	2.34981e-181	3.10744	28.363	5.79489e-177	2.52854e-175	7.51771	7.60014	8.87404	9.52693	9.47975	76220	6530402F18Rik	0.248407	0.263014	0.636006	1	0.967828	76220	6530402F18Rik	1.1768	1.34577	3.65905	6.41224
76224	6530409C15Rik	0.630909	0.11529	0.224284	2.81012	5.71124e-19	3.93692e-18	1.10205	4.48225e-07	1.45028e-06	-1.72723	2.81578e-14	2.39091e-13	76224	6530409C15Rik	0.63091	1.57486	0.115289	0.224283	3.44103	10.2239	1.5498e-24	1.17935e-23	4.54308	13.7761	3.54757e-43	2.10173e-42	2.81585	8.22667	1.92483e-16	8.06096e-16	3.6834	3.92884	5.5072	6.28277	5.08569	76224	6530409C15Rik	0.16501	0.195611	0.584158	1	0.436155	76224	6530409C15Rik	0.158893	0.204781	0.901111	1.80515
211378	6720489N17Rik	-0.52963	0.00144423	0.00543288	-1.3093	2.67906e-10	1.16194e-09	-0.577672	0.0272541	0.04741	1.67246	3.16465e-12	2.32054e-11	211378	6720489N17Rik	-0.52963	-3.18566	0.00144424	0.00543291	-1.83893	-9.18948	3.94761e-20	2.57881e-19	-2.4166	-10.4828	1.03679e-25	4.2392e-25	-0.74415	-4.35713	1.31778e-05	3.09856e-05	6.37043	6.01056	5.21696	4.92219	5.86102	211378	6720489N17Rik	1	0.779236	0.449544	0.366469	0.70251	211378	6720489N17Rik	2.04948	1.284	0.326384	0.176611
77209	8030453O22Rik	-0.480774	0.0863092	0.177795	-1.31446	0.000224715	0.000569904	1.3292	0.000274391	0.000660659	0.174161	0.56701	0.680732	77209	8030453O22Rik	-0.480773	-1.71519	0.0863095	0.177796	-1.79523	-5.22486	1.74289e-07	6.09291e-07	-0.46603	-1.59749	0.110156	0.144393	-0.291868	-1.05079	0.293355	0.373232	4.77171	4.47059	3.80922	4.48278	4.60241	77209	8030453O22Rik	1	0.811625	0.513171	0.818512	0.889274	77209	8030453O22Rik	1.58243	0.686577	0.320159	0.441946
212163	8030462N17Rik	0.420626	0.0410157	0.098808	0.873298	1.68032e-05	4.8796e-05	0.43619	0.0289322	0.0500683	-0.723123	0.000302546	0.000917884	212163	8030462N17Rik	0.420626	2.04337	0.0410155	0.0988082	1.29392	6.36209	1.99031e-10	8.4024e-10	1.73011	8.53696	1.37794e-17	4.48969e-17	1.00699	4.94037	7.79739e-07	2.00983e-06	7.37316	7.61612	8.17871	8.49222	8.00513	212163	8030462N17Rik	0.460393	0.544837	0.804681	1	0.713463	212163	8030462N17Rik	2.5912	2.69131	2.27719	3.45637
71523	8430429K09Rik	-0.224349	0.217308	0.365031	-0.585614	0.00516882	0.0107357	-0.167833	0.479303	0.574461	0.727585	0.00107363	0.00296429	71523	8430429K09Rik	-0.224348	-1.23372	0.217308	0.365032	-0.809962	-4.01658	5.90499e-05	0.000168111	-0.977795	-4.58357	4.57108e-06	9.19767e-06	-0.25021	-1.35929	0.174055	0.235772	5.63869	5.48674	5.13704	5.04081	5.4772	71523	8430429K09Rik	1	0.900037	0.706297	0.660727	0.894105	71523	8430429K09Rik	1.10164	0.634965	0.493333	0.399394
100041574	9030025P20Rik	-0.429447	0.0765244	0.162391	0.0688939	0.795952	0.848612	-0.360931	0.216974	0.297929	0.602533	0.0324551	0.0645813	100041574	9030025P20Rik	-0.429447	-1.77122	0.0765246	0.16239	-0.360553	-1.45459	0.145784	0.252441	-0.721484	-2.66506	0.00769752	0.0119886	-0.118951	-0.505497	0.61321	0.690249	4.66416	4.40597	4.44817	4.25636	4.58687	100041574	9030025P20Rik	1	0.836133	0.860954	0.753769	0.947835	100041574	9030025P20Rik	0.704673	0.370001	0.373642	0.251159
100504389	9030407P20Rik	-0.915683	1.74616e-06	1.08054e-05	-0.22345	0.313209	0.411426	0.0313048	0.894646	0.925109	0.717492	0.00100933	0.0028014	100504389	9030407P20Rik	-0.915683	-4.78078	1.74617e-06	1.08053e-05	-1.13913	-5.59274	2.23512e-08	8.28042e-08	-1.10783	-5.31258	1.08082e-07	2.38658e-07	-0.390336	-2.14126	0.0322531	0.0510599	5.8498	5.27541	5.14415	5.15407	5.59788	100504389	9030407P20Rik	1	0.671569	0.613163	0.617395	0.839778	100504389	9030407P20Rik	1.53476	0.557897	0.42458	0.284027
71603	9130004J05Rik	2.16668	1.11936e-10	1.0859e-09	-1.21615	0.000222246	0.000564005	-2.87827	3.17166e-10	1.32189e-09	0.351654	0.492159	0.61547	71603	9130004J05Rik	2.16669	6.44989	1.11932e-10	1.08586e-09	0.950537	2.72812	0.00636963	0.0142645	-1.92773	-4.17177	3.02238e-05	5.76671e-05	-1.57608	-3.76602	0.000165868	0.000352887	4.52296	5.92885	5.0456	3.63695	3.75341	71603	9130004J05Rik	0.377385	1	0.542144	0.204206	0.221373	71603	9130004J05Rik	0.418461	1.27111	1.0068	0.071184
71583	9130008F23Rik	-0.37719	0.0436913	0.103907	0.118471	0.548308	0.641205	-1.85956	1.19544e-12	5.85265e-12	0.370365	0.19811	0.300728	71583	9130008F23Rik	-0.37719	-2.01704	0.0436914	0.103907	-0.258719	-1.37067	0.170477	0.289863	-2.11828	-8.33986	7.43762e-17	2.36068e-16	-1.74792	-7.81774	5.37821e-15	2.13031e-14	5.87271	5.62687	5.69805	4.6201	4.81326	71583	9130008F23Rik	1	0.843324	0.885977	0.419688	0.479814	71583	9130008F23Rik	1.40036	0.908294	0.622121	0.123311
78921	9130019O22Rik	-0.426919	0.00203825	0.0073551	-0.488253	0.00250322	0.00549749	0.962891	2.04501e-09	8.04069e-09	0.0163054	0.908076	0.939414	78921	9130019O22Rik	-0.426919	-3.0846	0.00203826	0.00735512	-0.915172	-5.98294	2.19152e-09	8.70379e-09	0.0477192	0.347381	0.728305	0.771352	0.0640246	0.483431	0.62879	0.704365	6.52316	6.24915	5.95226	6.55113	6.56247	78921	9130019O22Rik	0.973122	0.80479	0.655105	0.992171	1	78921	9130019O22Rik	1.30243	0.707945	0.461805	0.69509
100043133	9130023H24Rik	-0.843835	5.73819e-08	4.2731e-07	0.691214	2.37257e-05	6.75737e-05	0.815018	3.50572e-08	1.24718e-07	0.417677	0.00172076	0.00455637	100043133	9130023H24Rik	-0.843834	-5.42677	5.73823e-08	4.27312e-07	-0.15262	-1.0375	0.299504	0.471855	0.662397	4.77051	1.83761e-06	3.79589e-06	1.08007	8.15242	3.56713e-16	1.47769e-15	6.61063	6.104	6.51661	7.03948	7.32279	100043133	9130023H24Rik	0.610403	0.429642	0.571893	0.8217	1	100043133	9130023H24Rik	1.46012	0.557571	0.788629	1.05012
77700	9130208D14Rik	0.557649	0.110433	0.21654	-0.486737	0.179284	0.257107	1.99059	9.62082e-09	3.59715e-08	-0.655459	0.0370614	0.0726245	77700	9130208D14Rik	0.557649	1.59625	0.110432	0.216539	0.0709127	0.193039	0.846928	0.974041	2.0615	6.18677	6.14104e-10	1.50488e-09	1.40604	4.17259	3.01156e-05	6.87198e-05	4.36829	4.6599	4.41153	5.57304	5.17096	77700	9130208D14Rik	0.433843	0.531028	0.447043	1	0.756768	77700	9130208D14Rik	0.133508	0.172683	0.11676	0.612463
77124	9130221H12Rik	-1.22118	2.18612e-22	4.2335e-21	-0.0637188	0.664992	0.742739	0.997878	1.03251e-12	5.07716e-12	0.123435	0.310683	0.431048	77124	9130221H12Rik	-1.22118	-9.73274	2.18613e-22	4.23352e-21	-1.2849	-9.78754	1.27358e-22	9.04633e-22	-0.287023	-2.45243	0.0141893	0.0214025	-0.163588	-1.46598	0.142652	0.197395	7.18567	6.40368	6.36502	6.9933	7.07487	77124	9130221H12Rik	1	0.581565	0.566185	0.875165	0.926072	77124	9130221H12Rik	5.7206	2.15038	1.38475	2.61135
231253	9130230L23Rik	0.357311	0.300356	0.463609	-0.819904	0.0321981	0.056906	0.743982	0.060517	0.0975432	-0.488774	0.197894	0.30046	231253	9130230L23Rik	0.357312	1.03567	0.300355	0.463607	-0.462592	-1.20599	0.22782	0.372923	0.28139	0.781591	0.434455	0.496515	-0.207384	-0.566219	0.571245	0.652976	3.81686	3.9959	3.53511	3.94917	3.70286	231253	9130230L23Rik	0.883292	1	0.726593	0.968132	0.816181	231253	9130230L23Rik	0.48926	0.490436	0.165805	0.389089
75758	9130401M01Rik	0.0171654	0.877777	0.93034	0.0934169	0.40668	0.505724	0.470666	2.75818e-05	7.49653e-05	0.310075	0.00502557	0.0121327	75758	9130401M01Rik	0.0171656	0.153789	0.877776	0.927516	0.110582	0.987846	0.323228	0.502923	0.581248	5.22268	1.76348e-07	3.85585e-07	0.891322	8.08793	6.0688e-16	2.4933e-15	9.42122	9.4311	9.48991	9.80228	10.0097	75758	9130401M01Rik	0.665047	0.669615	0.697477	0.866088	1	75758	9130401M01Rik	20.6242	16.5608	15.8124	19.296
414108	9230114K14Rik	-0.00501541	0.983466	0.99451	-0.805636	0.00347705	0.00744451	-0.177519	0.571844	0.659733	-0.403135	0.221301	0.328988	414108	9230114K14Rik	-0.00501498	-0.0207217	0.983468	0.991564	-0.810651	-2.99713	0.00272532	0.00643123	-0.988169	-3.4677	0.000524929	0.000910947	-1.3913	-4.82152	1.42471e-06	3.60784e-06	4.86413	4.85345	4.36185	4.27985	4.0465	414108	9230114K14Rik	1	0.992627	0.705994	0.666986	0.567373	414108	9230114K14Rik	0.722132	0.521858	0.178867	0.267108
320054	9230116N13Rik	-0.869323	0.0025475	0.00898726	0.193897	0.538311	0.631726	-0.179725	0.584489	0.670968	0.0300881	0.92713	0.953203	320054	9230116N13Rik	-0.869322	-3.01764	0.00254752	0.0089873	-0.675425	-2.33617	0.0194825	0.0404488	-0.85515	-2.82329	0.00475337	0.00758095	-0.825062	-2.84973	0.00437557	0.00789667	4.70929	4.20354	4.3172	4.21878	4.22391	320054	9230116N13Rik	1	0.704294	0.762025	0.711772	0.714309	320054	9230116N13Rik	0.61063	0.255041	0.344893	0.253913
100048895	9330020H09Rik	0.797204	1.21406e-05	6.68714e-05	-0.825877	1.3069e-05	3.84214e-05	-0.633509	0.00325749	0.00667313	0.242179	0.268614	0.385085	100048895	9330020H09Rik	0.797204	4.37505	1.21405e-05	6.68708e-05	-0.0286725	-0.148205	0.882181	0.974041	-0.662181	-3.16894	0.00152994	0.00255754	-0.420002	-2.12666	0.0334481	0.0528499	6.11331	6.63887	6.08885	5.71412	5.84077	100048895	9330020H09Rik	0.694689	1	0.68301	0.526769	0.575104	100048895	9330020H09Rik	0.871591	1.38334	0.763547	0.359191
320950	9330104G04Rik	-0.922534	0.000429331	0.00181571	-2.07823	6.349e-07	2.13392e-06	0.909035	0.0528594	0.0863891	1.82704	1.47215e-07	6.92581e-07	320950	9330104G04Rik	-0.922534	-3.52136	0.000429333	0.00181571	-3.00076	-7.48781	7.00323e-14	3.50356e-13	-2.09173	-6.16889	6.8771e-10	1.68115e-09	-0.264686	-1.07166	0.283874	0.362867	4.85517	4.27166	3.27297	3.64887	4.67215	320950	9330104G04Rik	1	0.667339	0.333972	0.43338	0.88086	320950	9330104G04Rik	0.779817	0.350963	0.0154094	0.178677
100689703	9330133O14Rik	-0.658385	1.9484e-07	1.35785e-06	-1.47408	1.26837e-19	9.02464e-19	0.638485	0.00033358	0.000795605	1.4714	2.71577e-23	4.20203e-22	100689703	9330133O14Rik	-0.658384	-5.20419	1.94841e-07	1.35786e-06	-2.13247	-13.6043	3.77322e-42	4.60537e-41	-1.49398	-10.2548	1.12635e-24	4.47891e-24	-0.0225805	-0.185596	0.852761	0.889307	7.36611	6.92178	6.03549	6.40323	7.34376	100689703	9330133O14Rik	1	0.734924	0.397598	0.513032	0.984629	100689703	9330133O14Rik	3.35392	1.47877	0.476129	0.75499
414085	9330151L19Rik	-2.08541	1.45891e-22	2.85774e-21	-0.206366	0.396759	0.496416	0.481725	0.0500847	0.0824208	0.810189	0.000306936	0.000930098	414085	9330151L19Rik	-2.08541	-9.77379	1.45893e-22	2.85778e-21	-2.29178	-10.2848	8.25079e-25	6.32221e-24	-1.81006	-8.37818	5.37504e-17	1.71415e-16	-0.999866	-5.02624	5.00202e-07	1.30774e-06	6.95949	5.59936	5.46502	5.77267	6.27812	414085	9330151L19Rik	1	0.389545	0.354909	0.439268	0.62357	414085	9330151L19Rik	4.07942	0.86826	0.473449	0.614333
319673	9330159M07Rik	0.279025	0.348628	0.515642	0.102402	0.734091	0.801495	-1.36123	0.000177613	0.000438439	0.390689	0.309564	0.42987	319673	9330159M07Rik	0.279026	0.937256	0.348627	0.515641	0.381427	1.2694	0.204297	0.339287	-0.979801	-2.72165	0.00649578	0.0102039	-0.589111	-1.80702	0.0707598	0.104667	4.30518	4.48015	4.54285	3.77434	3.98096	319673	9330159M07Rik	0.848114	0.957471	1	0.587026	0.677414	319673	9330159M07Rik	0.378665	0.25305	0.354422	0.0354278
320377	9330175E14Rik	-0.788306	0.0196396	0.0532459	3.81491	2.466e-37	3.14942e-36	0.920452	2.18009e-08	7.89542e-08	-1.13893	5.69309e-12	4.09422e-11	320377	9330175E14Rik	-0.788306	-2.33316	0.0196397	0.0532462	3.0266	13.0024	1.18615e-38	1.33904e-37	3.94705	17.3095	3.98696e-67	3.45271e-66	2.80812	12.0284	2.51995e-33	1.72148e-32	4.55668	4.27089	6.33549	6.98851	6.18567	320377	9330175E14Rik	0.185331	0.152025	0.635947	1	0.573221	320377	9330175E14Rik	0.508793	0.231825	2.01534	3.2889
77558	9330179D12Rik	0.587029	0.335336	0.501874	2.25213	7.65382e-06	2.31295e-05	0.668064	0.0858656	0.132901	-0.327597	0.38596	0.511413	77558	9330179D12Rik	0.587029	0.963423	0.335335	0.501873	2.83915	5.38612	7.19943e-08	2.58372e-07	3.50722	6.75892	1.39021e-11	3.6661e-11	3.17962	6.12671	8.97163e-10	2.76736e-09	2.63159	2.84468	3.89267	4.33453	4.12732	77558	9330179D12Rik	0.30716	0.356049	0.736183	1	0.86621	77558	9330179D12Rik	0.166656	0.095461	0.507149	0.423221
231014	9330182L06Rik	0.0790776	0.78751	0.874638	0.184919	0.535526	0.62921	0.0314393	0.917161	0.939872	-1.02831	0.00151049	0.00404787	231014	9330182L06Rik	0.0790782	0.269547	0.787509	0.874636	0.263997	0.89761	0.369393	0.561374	0.295437	0.993894	0.320274	0.379937	-0.732876	-2.31538	0.0205922	0.0336654	4.77875	4.80532	4.92081	4.94698	4.36049	231014	9330182L06Rik	0.889935	0.906475	0.982026	1	0.665965	231014	9330182L06Rik	0.338242	0.300526	0.163752	0.136653
77265	9430002A10Rik	-0.464222	0.265078	0.422614	0.304937	0.487139	0.584299	-0.978576	0.0504467	0.0829371	-0.302088	0.586963	0.698175	77265	9430002A10Rik	-0.464221	-1.11447	0.265079	0.422615	-0.159285	-0.385535	0.699841	0.914957	-1.13786	-2.36618	0.0179728	0.026728	-1.43995	-3.0036	0.00266809	0.00494871	3.36896	3.10693	3.2621	2.80288	2.68162	77265	9430002A10Rik	1	0.833913	0.928608	0.675451	0.620999	77265	9430002A10Rik	0.910087	0.304091	0.587463	0.283825
230996	9430015G10Rik	-0.771227	2.75158e-12	3.03884e-11	-0.580012	8.75773e-07	2.89636e-06	-0.494965	0.000108306	0.00027481	0.363765	0.00442305	0.0107937	230996	9430015G10Rik	-0.771227	-6.98986	2.7516e-12	3.03886e-11	-1.35124	-11.7667	5.79149e-32	5.54988e-31	-1.8462	-15.2732	1.15288e-52	8.08825e-52	-1.48244	-12.9164	3.63884e-38	2.76485e-37	8.89905	8.37252	7.99227	7.68615	7.91128	230996	9430015G10Rik	1	0.694223	0.533377	0.431402	0.504258	230996	9430015G10Rik	11.5533	5.14714	3.27568	1.47627
320692	9430037G07Rik	0.36234	0.390755	0.558188	0.557229	0.175751	0.253035	-1.40123	0.00293409	0.00606286	0.696788	0.151824	0.241599	320692	9430037G07Rik	0.362341	0.858252	0.390754	0.558187	0.919571	2.22764	0.0259044	0.0527551	-0.481654	-1.00265	0.31603	0.375262	0.215133	0.500254	0.616897	0.693545	3.37914	3.54678	3.87383	3.1705	3.45158	320692	9430037G07Rik	0.709713	0.797163	1	0.614153	0.74626	320692	9430037G07Rik	0.223917	0.246901	0.26017	0.0523741
77252	9430038I01Rik	0.191044	0.177432	0.313303	-0.531048	0.00024383	0.000615991	-0.85782	2.69286e-08	9.67434e-08	0.44362	0.00436594	0.0106646	77252	9430038I01Rik	0.191044	1.34871	0.177431	0.313302	-0.340003	-2.35443	0.0185512	0.0386447	-1.19782	-7.91305	2.51153e-15	7.57795e-15	-0.754203	-5.1704	2.33595e-07	6.26244e-07	8.39014	8.5189	8.16542	7.63389	7.90194	77252	9430038I01Rik	0.914616	1	0.782696	0.541486	0.652045	77252	9430038I01Rik	13.1211	12.8991	9.00032	3.84552
100037260	9430060I03Rik	-1.46514	0.00697939	0.0218051	1.17145	0.0411994	0.0710701	-0.106846	0.838432	0.883224	-0.0743666	0.887582	0.925762	100037260	9430060I03Rik	-1.46514	-2.69782	0.00697942	0.0218052	-0.293697	-0.621909	0.534002	0.75199	-0.400543	-0.817088	0.413878	0.476967	-0.474909	-1.00056	0.317039	0.399181	2.88067	2.26259	2.71838	2.68282	2.62984	100037260	9430060I03Rik	1	0.651539	0.893606	0.87185	0.840416	100037260	9430060I03Rik	0.189534	0.0422199	0.101954	0.118219
77428	9430083A17Rik	-2.04669	0.00369608	0.0125064	-2.34234	0.0318735	0.0563831	0.980397	0.420927	0.518105	-0.349589	0.748335	0.831194	77428	9430083A17Rik	-2.04668	-2.903	0.00369612	0.0125066	-4.38903	-4.19724	2.70193e-05	7.92645e-05	-3.40863	-3.83547	0.000125325	0.000228255	-3.75822	-4.20972	2.55689e-05	5.87031e-05	2.93051	1.77526	1.23125	1.4202	1.32541	77428	9430083A17Rik	1	0.448989	0.307944	0.351035	0.328712	77428	9430083A17Rik	0.214129	0.0119246	0.0345552	0.0111299
434350	9430091E24Rik	-1.52172	4.16257e-10	3.83417e-09	0.488892	0.0678397	0.110641	-0.237905	0.382664	0.479583	0.314145	0.240707	0.352423	434350	9430091E24Rik	-1.52172	-6.24781	4.16261e-10	3.8342e-09	-1.03283	-4.38038	1.18471e-05	3.59451e-05	-1.27074	-5.10723	3.26924e-07	7.05511e-07	-0.956592	-4.15375	3.27078e-05	7.44181e-05	5.60481	4.66273	4.95213	4.79605	4.99993	434350	9430091E24Rik	1	0.520481	0.6361	0.570872	0.657529	434350	9430091E24Rik	1.41158	0.387116	0.386821	0.199347
100500713	9530027J09Rik	-1.50039	0.00760517	0.0234918	1.10394	0.0623901	0.102779	0.297572	0.577321	0.664684	-0.00962932	0.985115	0.991881	100500713	9530027J09Rik	-1.50039	-2.66911	0.0076052	0.0234919	-0.396452	-0.784378	0.432819	0.639592	-0.0988802	-0.197765	0.843229	0.869688	-0.10851	-0.223015	0.823524	0.867738	3.09335	2.42141	2.90335	3.03588	3.05837	100500713	9530027J09Rik	1	0.627661	0.8766	0.960941	0.976045	100500713	9530027J09Rik	0.33795	0.232899	0.184062	0.158093
213673	9530068E07Rik	0.200401	0.00226168	0.00807372	0.46045	2.2127e-12	1.09044e-11	0.497961	2.64204e-14	1.42703e-13	-0.489213	7.0673e-14	5.86123e-13	213673	9530068E07Rik	0.200401	3.05353	0.00226167	0.00807369	0.660851	10.0836	6.52691e-24	4.86418e-23	1.15881	17.709	3.57177e-70	3.21079e-69	0.669599	10.2248	1.53556e-24	8.35591e-24	12.5532	12.6803	12.9786	13.3153	12.9839	213673	9530068E07Rik	0.589634	0.643915	0.791849	1	0.794777	213673	9530068E07Rik	98.4894	90.4013	110.803	116.778
68283	9530077C05Rik	-0.450937	0.191443	0.331847	-2.23841	2.05304e-05	5.89438e-05	-1.05486	0.193609	0.269787	0.938585	0.247024	0.359722	68283	9530077C05Rik	-0.450936	-1.30632	0.191444	0.331848	-2.68935	-5.24457	1.56645e-07	5.49544e-07	-3.74421	-5.28514	1.25607e-07	2.76371e-07	-2.80563	-5.48478	4.13973e-08	1.16467e-07	3.6482	3.35923	2.30666	2.07673	2.27035	68283	9530077C05Rik	1	0.818485	0.3946	0.336465	0.384792	68283	9530077C05Rik	0.510721	0.247717	0.0797592	0.0308277
638247	9530082P21Rik	-0.365694	0.00056401	0.0023262	0.237858	0.028167	0.0503829	0.60826	1.21403e-08	4.49525e-08	0.259458	0.0122644	0.0270856	638247	9530082P21Rik	-0.365694	-3.44835	0.000564013	0.00232621	-0.127836	-1.20607	0.22779	0.372904	0.480424	4.60165	4.19159e-06	8.45631e-06	0.739882	7.19623	6.18998e-13	2.25776e-12	8.91545	8.68083	8.82914	9.22973	9.40563	638247	9530082P21Rik	0.71194	0.605084	0.670594	0.885217	1	638247	9530082P21Rik	7.0531	4.02553	4.47655	5.09387
319743	9630013D21Rik	-0.4922	0.213458	0.360184	-1.3766	0.00253534	0.00556413	-2.53405	0.00106076	0.0023583	-0.322447	0.740606	0.825062	319743	9630013D21Rik	-0.492199	-1.24411	0.213459	0.360186	-1.8688	-4.1906	2.78222e-05	8.1491e-05	-4.40285	-5.94722	2.72741e-09	6.49254e-09	-4.72529	-6.37886	1.78413e-10	5.71769e-10	4.28262	3.98806	3.1631	2.35352	2.24767	319743	9630013D21Rik	1	0.815316	0.460245	0.262592	0.244016	319743	9630013D21Rik	0.911447	0.411137	0.0772198	0
268759	9930012K11Rik	-3.28462	1.57077e-47	6.38223e-46	-0.177561	0.551573	0.643966	0.622248	0.0360248	0.0612485	1.32111	3.65621e-08	1.82787e-07	268759	9930012K11Rik	-3.28462	-14.4822	1.5707e-47	6.38197e-46	-3.46218	-14.0012	1.53236e-44	1.95571e-43	-2.83993	-12.6231	1.57401e-36	8.20864e-36	-1.51882	-8.6784	4.01377e-18	1.78837e-17	6.60227	4.49309	4.40238	4.74254	5.53679	268759	9930012K11Rik	1	0.231778	0.217654	0.275527	0.477815	268759	9930012K11Rik	4.44168	0.35906	0.173414	0.301618
320469	9930014A18Rik	-0.347638	0.323166	0.488498	-1.82598	4.45724e-05	0.000123041	-0.297147	0.58935	0.675165	0.133039	0.809486	0.874142	320469	9930014A18Rik	-0.347637	-0.987971	0.323167	0.488498	-2.17362	-4.96093	7.01569e-07	2.35033e-06	-2.47077	-5.18491	2.16115e-07	4.7017e-07	-2.33773	-5.31385	1.07336e-07	2.94328e-07	4.26143	4.02888	2.99319	2.94141	2.98004	320469	9930014A18Rik	1	0.85113	0.415167	0.400529	0.4114	320469	9930014A18Rik	0.29121	0.152905	0.00671345	0.00648704
240613	9930021J03Rik	-0.0507284	0.432698	0.597752	0.365793	2.44144e-08	9.22948e-08	0.0189552	0.772947	0.829267	-0.269785	4.58535e-05	0.000157203	240613	9930021J03Rik	-0.0507283	-0.784583	0.432698	0.597751	0.315064	4.92219	8.55816e-07	2.84117e-06	0.33402	5.15689	2.51089e-07	5.45004e-07	0.0642347	0.995592	0.319448	0.401415	9.17988	9.14694	9.3861	9.39787	9.22078	240613	9930021J03Rik	0.859763	0.840358	0.991878	1	0.884484	240613	9930021J03Rik	3.5454	2.53661	2.67762	2.25146
320509	9930022D16Rik	2.68011	7.00388e-33	1.98309e-31	-1.26119	3.48487e-10	1.49654e-09	-0.628327	0.00864892	0.0165251	-1.02668	0.000277418	0.000846849	320509	9930022D16Rik	2.68011	11.9437	7.00344e-33	1.98297e-31	1.41892	5.88617	3.95259e-09	1.54112e-08	0.790592	3.04912	0.0022951	0.00377267	-0.236087	-0.831549	0.405664	0.492049	4.54606	6.22731	5.37893	4.98804	4.43569	320509	9930022D16Rik	0.311813	1	0.555409	0.423586	0.288847	320509	9930022D16Rik	0.316171	1.86197	0.497467	0.308134
194268	9930104L06Rik	-1.03696	3.33872e-23	6.70282e-22	0.660775	1.26741e-09	5.20767e-09	0.352468	0.000752799	0.00171015	0.469846	2.59986e-06	1.0572e-05	194268	9930104L06Rik	-1.03696	-9.92204	3.33875e-23	6.70288e-22	-0.376181	-3.71855	0.000200367	0.000538747	-0.0237133	-0.236905	0.812731	0.843592	0.446133	4.62975	3.66107e-06	8.9968e-06	8.48717	7.83387	8.24187	8.47343	8.78871	194268	9930104L06Rik	0.811385	0.515898	0.684516	0.803695	1	194268	9930104L06Rik	6.58913	2.88437	3.12559	3.76674
667214	9930111J21Rik1	-1.78835	1.21986e-07	8.73166e-07	3.26124	8.11014e-23	6.61282e-22	1.17061	1.66032e-05	4.63294e-05	-1.69938	6.00293e-10	3.56683e-09	667214	9930111J21Rik1	-1.78835	-5.29049	1.21989e-07	8.73187e-07	1.4729	5.1852	2.15783e-07	7.4907e-07	2.6435	9.44934	3.40985e-21	1.24081e-20	0.944126	3.294	0.000987742	0.00193502	5.71362	4.86323	6.63888	7.47523	6.29142	667214	9930111J21Rik1	0.294919	0.163572	0.560058	1	0.440187	667214	9930111J21Rik1	0.810275	0.166136	0.873705	1.74878
245240	9930111J21Rik2	0.535556	0.361135	0.528303	2.7031	1.09323e-08	4.24001e-08	-0.688622	0.0666493	0.106087	-2.43989	7.00027e-06	2.68747e-05	245240	9930111J21Rik2	0.535556	0.913207	0.361134	0.528302	3.23866	6.56804	5.09826e-11	2.22276e-10	2.55004	4.985	6.19633e-07	1.31598e-06	0.110145	0.174892	0.861165	0.895799	2.27363	2.45542	3.90256	3.46665	2.33966	245240	9930111J21Rik2	0.323328	0.366748	1	0.739231	0.33847	245240	9930111J21Rik2	0.044406	0.0593503	0.243645	0.152336
50518	a	0.324383	0.835141	0.904572	1.49727	0.300892	0.398313	2.69492	0.0130085	0.0241093	-0.0264451	0.972188	0.983675	50518	a	0.324374	0.208108	0.835144	0.903484	1.82164	1.25865	0.208155	0.344858	4.51656	3.66984	0.000242705	0.000431956	4.49012	3.67663	0.000236334	0.000494807	0.387261	0.436672	0.606002	1.32688	1.36396	50518	a	0.508142	0.525847	0.591334	0.974629	1	50518	a	0	0	0.0497688	0.384723
100126243	A030001D20Rik	2.58534	8.17101e-07	5.29905e-06	-2.4506	1.39718e-05	4.09374e-05	-2.39887	0.0345678	0.0590206	0.266914	0.842567	0.895079	100126243	A030001D20Rik	2.58534	4.93124	8.17088e-07	5.29896e-06	0.134741	0.207595	0.835545	0.974041	-2.26413	-2.02912	0.042446	0.0598294	-1.99721	-2.06094	0.0393085	0.0612334	1.72525	3.05767	1.7775	1.30014	1.2814	100126243	A030001D20Rik	0.397102	1	0.411747	0.295753	0.291938	100126243	A030001D20Rik	0.107786	0.475396	0.0834909	0.0201688
319266	A130010J15Rik	-1.14781	9.77464e-14	1.19021e-12	-0.575002	0.00152994	0.00346322	1.1179	5.08632e-10	2.09321e-09	0.966296	2.39555e-10	1.47726e-09	319266	A130010J15Rik	-1.14781	-7.44391	9.77469e-14	1.19021e-12	-1.72281	-10.1721	2.641e-24	1.99822e-23	-0.604908	-3.97212	7.12363e-05	0.0001322	0.361388	2.57972	0.00988808	0.016956	7.12738	6.39131	6.04763	6.72383	7.37091	319266	A130010J15Rik	0.844677	0.507121	0.399626	0.638574	1	319266	A130010J15Rik	2.37499	0.725369	0.359311	0.859305
319269	A130040M12Rik	1.55401	4.5131e-24	9.48307e-23	-0.121494	0.421575	0.520453	1.56521	1.71813e-25	1.63639e-24	-0.228843	0.122394	0.202044	319269	A130040M12Rik	1.55401	10.1198	4.51304e-24	9.48296e-23	1.43251	9.29311	1.49849e-20	9.92954e-20	2.99772	19.6689	3.97965e-86	4.36621e-85	2.76888	18.1755	8.07224e-74	1.16379e-72	8.65988	9.56432	9.49202	10.5554	10.3921	319269	A130040M12Rik	0.268778	0.503105	0.478512	1	0.892956	319269	A130040M12Rik	3.91103	9.40902	5.13786	14.4982
320138	A130050O07Rik	-0.686866	0.0482489	0.112356	0.719288	0.04349	0.0746357	-2.7592	3.16383e-08	1.13042e-07	-0.557633	0.380771	0.505956	320138	A130050O07Rik	-0.686865	-1.97517	0.0482492	0.112356	0.0324234	0.0965112	0.923115	0.984265	-2.72677	-5.5331	3.14621e-08	7.12743e-08	-3.28441	-6.3254	2.52575e-10	8.03183e-10	4.33887	3.90364	4.31958	3.00329	2.80356	320138	A130050O07Rik	1	0.739579	0.986719	0.396233	0.345007	320138	A130050O07Rik	0.423583	0.188712	0.398743	0.0440338
791370	A130051J06Rik	0.357063	0.381581	0.549038	-1.48513	0.00191329	0.00427062	-0.615621	0.302875	0.39455	1.07116	0.0608666	0.111659	791370	A130051J06Rik	0.357064	0.874989	0.38158	0.549036	-1.12807	-2.35382	0.0185816	0.0386892	-1.74369	-3.20958	0.00132929	0.00223561	-0.672523	-1.50678	0.131868	0.183933	3.44933	3.64757	2.91943	2.69206	3.09888	791370	A130051J06Rik	0.871612	1	0.603681	0.515658	0.683638	791370	A130051J06Rik	0.230969	0.272381	0.0920856	0.0635572
319272	A130077B15Rik	-0.185167	0.424616	0.590168	-0.192636	0.449019	0.547232	1.28903	9.10706e-08	3.11969e-07	-0.0800311	0.703291	0.795526	319272	A130077B15Rik	-0.185166	-0.798436	0.424617	0.59017	-0.377802	-1.5476	0.121718	0.214893	0.911227	4.19302	2.75259e-05	5.26821e-05	0.831196	3.89394	9.86274e-05	0.000214789	5.06983	4.96848	4.86158	5.64353	5.58728	319272	A130077B15Rik	0.671887	0.62631	0.581577	1	0.961757	319272	A130077B15Rik	0.684292	0.363966	0.256914	0.653289
319487	A230028O05Rik	-0.00701308	0.956949	0.977628	0.370335	0.00466525	0.00977386	1.06312	3.81155e-17	2.40169e-16	-1.32986	1.18883e-25	2.12244e-24	319487	A230028O05Rik	-0.00701289	-0.0539807	0.956951	0.974704	0.363322	2.81542	0.00487129	0.0110956	1.42644	11.3872	4.84546e-30	2.20814e-29	0.0965743	0.744187	0.456764	0.543137	7.84644	7.84271	8.07476	8.79803	7.91027	319487	A230028O05Rik	0.517062	0.515726	0.60572	1	0.540451	319487	A230028O05Rik	4.07524	2.97441	3.15669	5.02812
624086	A230045G11Rik	-1.25855	2.04033e-16	2.97372e-15	-1.3852	4.25871e-13	2.18876e-12	0.934129	3.41813e-06	1.01921e-05	1.04376	9.78108e-10	5.72076e-09	624086	A230045G11Rik	-1.25855	-8.21969	2.04035e-16	2.97375e-15	-2.64376	-14.4823	1.56758e-47	2.11203e-46	-1.70963	-10.3337	4.96038e-25	1.98873e-24	-0.665873	-4.48746	7.20766e-06	1.73165e-05	7.50719	6.65519	5.83791	6.37236	7.04341	624086	A230045G11Rik	1	0.554013	0.31441	0.455387	0.725082	624086	A230045G11Rik	9.20744	2.58208	1.08786	1.94851
319278	A230050P20Rik	-0.398219	0.00273196	0.00955873	1.46692	6.33679e-29	6.31106e-28	0.54198	1.67882e-05	4.68041e-05	-1.19095	9.06088e-21	1.20586e-19	319278	A230050P20Rik	-0.398218	-2.99639	0.00273197	0.0095587	1.06871	8.33453	7.78044e-17	4.43072e-16	1.61069	12.6369	1.32227e-36	6.916e-36	0.419735	3.23638	0.00121055	0.00234747	8.43966	8.20054	9.12514	9.50491	8.70509	319278	A230050P20Rik	0.477892	0.404898	0.76856	1	0.574422	319278	A230050P20Rik	9.51049	6.14371	13.6082	14.5927
320845	A230056P14Rik	-0.344871	0.218702	0.366782	0.239876	0.420382	0.519307	0.0100074	0.973668	0.981233	-0.323565	0.295043	0.414402	320845	A230056P14Rik	-0.344871	-1.22999	0.218703	0.366781	-0.104994	-0.375118	0.707573	0.921629	-0.0949871	-0.331894	0.739969	0.781338	-0.418552	-1.46233	0.14365	0.198608	4.36369	4.18197	4.30881	4.31644	4.13227	320845	A230056P14Rik	1	0.881651	0.962673	0.967779	0.851797	320845	A230056P14Rik	0.886066	0.532917	0.465737	0.331601
320742	A230072C01Rik	-1.01744	2.0807e-05	0.000110898	-0.417293	0.135011	0.202342	0.846896	0.00238037	0.00499362	0.552487	0.0234521	0.0484214	320742	A230072C01Rik	-1.01744	-4.25605	2.08071e-05	0.000110899	-1.43473	-5.53684	3.07986e-08	1.13149e-07	-0.587837	-2.46433	0.0137269	0.0207439	-0.0353502	-0.159871	0.872983	0.904558	5.54537	4.90721	4.68912	5.17271	5.52163	320742	A230072C01Rik	1	0.642531	0.552386	0.772352	0.983676	320742	A230072C01Rik	1.21204	0.307787	0.406833	0.483831
442825	A230083G16Rik	-0.354304	0.20861	0.354553	1.30142	2.06365e-06	6.59697e-06	-1.63666	9.76205e-08	3.33606e-07	-0.0835513	0.810125	0.874462	442825	A230083G16Rik	-0.354304	-1.2574	0.208611	0.354553	0.94712	3.7262	0.000194392	0.000523105	-0.689544	-2.19705	0.0280168	0.0405725	-0.773096	-2.55874	0.0105053	0.0179358	4.38134	4.17551	4.96806	3.99925	3.96155	442825	A230083G16Rik	0.665854	0.577323	1	0.510926	0.497747	442825	A230083G16Rik	1.25623	0.899462	1.14684	0.402969
320466	A230103J11Rik	-1.58219	0.00129497	0.00493729	1.47984	0.00391822	0.00832211	1.02386	0.00963581	0.0182639	-0.260467	0.46849	0.593051	320466	A230103J11Rik	-1.58219	-3.21709	0.00129497	0.00493726	-0.102344	-0.255089	0.798654	0.967945	0.921512	2.50726	0.0121672	0.0184982	0.661045	1.80795	0.0706149	0.10448	3.36384	2.72382	3.30789	3.84976	3.72767	320466	A230103J11Rik	0.714045	0.458205	0.686884	1	0.918857	320466	A230103J11Rik	0.284554	0.0838934	0.113449	0.156605
320919	A230107N01Rik	-3.10924	8.73546e-06	4.90505e-05	2.34416	0.00138434	0.00315501	-0.510043	0.368906	0.464827	0.211845	0.713207	0.803632	320919	A230107N01Rik	-3.10924	-4.44632	8.7355e-06	4.90507e-05	-0.765086	-1.62207	0.104788	0.187506	-1.27513	-2.43812	0.014764	0.0222276	-1.06328	-2.20554	0.0274165	0.0439541	2.9714	1.83906	2.57179	2.3315	2.44538	320919	A230107N01Rik	1	0.456175	0.758064	0.641757	0.694468	320919	A230107N01Rik	0.333272	0.0303703	0.146678	0.0425194
442840	A330017A19Rik	-1.93366	0.0153359	0.0432623	-1.74623	0.124043	0.188151	1.61849	0.166459	0.236725	-0.989336	0.341917	0.464111	442840	A330017A19Rik	-1.93366	-2.42434	0.015336	0.0432622	-3.67989	-3.43182	0.000599546	0.00153451	-2.0614	-2.43666	0.0148235	0.022313	-3.05073	-3.27944	0.00104012	0.00203304	2.37525	1.37612	1.09594	1.41666	1.17403	442840	A330017A19Rik	1	0.500301	0.411992	0.514558	0.434906	442840	A330017A19Rik	0.482381	0.0254494	0.0245824	0.0712602
320977	A330023F24Rik	-0.195737	0.171358	0.305713	-1.15258	7.08142e-12	3.39079e-11	1.65545	4.44864e-23	3.78665e-22	-0.439142	0.00275084	0.00701124	320977	A330023F24Rik	-0.195737	-1.36785	0.171358	0.305714	-1.34831	-8.203	2.34463e-16	1.3067e-15	0.30714	2.16063	0.0307237	0.0442493	-0.132002	-0.921284	0.356902	0.441299	6.97029	6.84879	6.14919	7.17935	6.88654	320977	A330023F24Rik	0.865096	0.795225	0.489656	1	0.816311	320977	A330023F24Rik	1.49945	1.02263	0.444173	0.922446
74333	A330040F15Rik	-0.918168	0.0501452	0.115996	0.248975	0.63573	0.717283	1.36511	0.00358753	0.00730729	-0.993774	0.0227885	0.0472105	74333	A330040F15Rik	-0.918167	-1.95872	0.0501454	0.115996	-0.669192	-1.43202	0.152138	0.262004	0.695917	1.72356	0.0847865	0.113527	-0.297857	-0.684731	0.493514	0.579506	3.03871	2.62667	2.72751	3.39245	2.88252	74333	A330040F15Rik	0.78255	0.588134	0.630713	1	0.702257	74333	A330040F15Rik	0.546724	0.2579	0.124557	0.300891
606735	A330069E16Rik	-0.128605	0.621698	0.757671	-0.884263	0.00343939	0.00737093	0.00925817	0.97821	0.984672	0.443736	0.166699	0.261013	606735	A330069E16Rik	-0.128604	-0.493444	0.621699	0.757673	-1.01287	-3.43522	0.00059207	0.00151674	-1.00361	-3.31827	0.000905765	0.00154433	-0.559873	-2.04403	0.040951	0.0635873	4.77817	4.70877	4.18908	4.19604	4.45192	606735	A330069E16Rik	1	0.953036	0.664764	0.667976	0.797608	606735	A330069E16Rik	1.3159	1.51892	0.656368	0.67154
97159	A430005L14Rik	-0.158815	0.335602	0.502223	-0.857958	3.64794e-07	1.24963e-06	-0.0903398	0.601073	0.686091	0.510731	0.00282759	0.00718888	97159	A430005L14Rik	-0.158814	-0.962888	0.335604	0.502225	-1.01677	-6.05489	1.40515e-09	5.65538e-09	-1.10711	-6.54575	5.91972e-11	1.51969e-10	-0.596382	-3.58956	0.000331237	0.000683756	9.05062	8.94144	8.38124	8.33238	8.65521	97159	A430005L14Rik	1	0.927116	0.628775	0.607837	0.76027	97159	A430005L14Rik	21.7367	15.9764	9.75487	7.03153
243308	A430033K04Rik	-2.1914	5.21324e-14	6.43485e-13	0.255487	0.446878	0.545257	0.712562	0.0254019	0.0444839	0.660882	0.0190467	0.0402701	243308	A430033K04Rik	-2.1914	-7.52646	5.21329e-14	6.43491e-13	-1.93591	-6.67801	2.42209e-11	1.0756e-10	-1.22335	-4.51004	6.48146e-06	1.29203e-05	-0.56247	-2.26126	0.0237433	0.0384199	5.5562	4.23443	4.37101	4.78267	5.17774	243308	A430033K04Rik	1	0.400042	0.439767	0.584982	0.769257	243308	A430033K04Rik	1.28563	0.214787	0.109195	0.189922
320312	A430035B10Rik	-0.309943	0.332849	0.49898	-0.153725	0.650659	0.729951	-0.460984	0.210274	0.290099	-1.04961	0.0122049	0.0269659	320312	A430035B10Rik	-0.309942	-0.968389	0.33285	0.498982	-0.463667	-1.40895	0.15885	0.272404	-0.92465	-2.64059	0.00827622	0.012855	-1.97426	-5.12487	2.97747e-07	7.92803e-07	4.63946	4.44034	4.342	4.10141	3.52873	320312	A430035B10Rik	1	0.871086	0.813687	0.6887	0.463061	320312	A430035B10Rik	0.771646	0.644584	0.266839	0.24065
319486	A430057M04Rik	-0.168089	0.53739	0.689541	-1.61912	7.30111e-06	2.21061e-05	1.38065	0.000240998	0.000584473	0.441857	0.139589	0.225376	319486	A430057M04Rik	-0.168089	-0.616762	0.537391	0.689543	-1.78721	-5.06101	4.17044e-07	1.42186e-06	-0.406559	-1.39172	0.164009	0.207895	0.0352981	0.130871	0.895878	0.921132	4.61573	4.51023	3.6853	4.37624	4.6111	319486	A430057M04Rik	1	0.929482	0.524699	0.847044	0.996791	319486	A430057M04Rik	0.506731	0.376865	0.0949632	0.244695
414110	A430072P03Rik	2.90932	0.00145325	0.00545882	2.81951	2.06092e-12	1.01884e-11	1.94893	4.55314e-18	3.01037e-17	-1.28763	4.11704e-10	2.48678e-09	414110	A430072P03Rik	2.90932	3.18387	0.00145322	0.00545879	5.72883	6.66739	2.60401e-11	1.15381e-10	7.67777	9.01856	1.90585e-19	6.56931e-19	6.39014	7.4785	7.51781e-14	2.85476e-13	2.74017	3.28956	4.67005	6.02799	5.11256	414110	A430072P03Rik	0.102393	0.149848	0.39014	1	0.530188	414110	A430072P03Rik	0.0235558	0.0944495	0.798278	2.00553
403202	A430093F15Rik	2.3222	1.07236e-13	1.30369e-12	0.586331	0.0186332	0.0347018	0.630809	0.00844975	0.01618	-0.906652	0.000171943	0.000541161	403202	A430093F15Rik	2.3222	7.43167	1.07235e-13	1.30367e-12	2.90854	9.4271	4.21578e-21	2.83904e-20	3.53934	11.6115	3.60134e-31	1.68808e-30	2.63269	8.49436	1.99028e-17	8.67746e-17	4.26314	5.45416	5.83013	6.25526	5.61677	403202	A430093F15Rik	0.25137	0.573913	0.744772	1	0.642389	403202	A430093F15Rik	0.201811	0.826042	1.07472	1.22729
319650	A430108G06Rik	-0.237331	0.590837	0.733364	-4.57482	2.39024e-05	6.80522e-05	3.41131	0.00224318	0.00473048	-0.0425005	0.941394	0.963471	319650	A430108G06Rik	-0.23733	-0.537621	0.590839	0.733366	-4.81215	-4.46704	7.93104e-06	2.44371e-05	-1.40083	-2.70395	0.00685216	0.0107365	-1.44333	-2.89334	0.00381164	0.0069337	3.37502	3.21239	1.87254	2.61069	2.58415	319650	A430108G06Rik	1	0.893391	0.352946	0.588727	0.577994	319650	A430108G06Rik	0.630163	0.210559	0	0.0873452
329307	A430110L20Rik	-2.76004	2.31873e-16	3.36986e-15	0.712846	0.0725282	0.117482	2.04494	5.96543e-11	2.61473e-10	-0.33576	0.167639	0.262244	329307	A430110L20Rik	-2.76004	-8.20433	2.31875e-16	3.36989e-15	-2.0472	-6.75777	1.40128e-11	6.3075e-11	-0.00225658	-0.00978104	0.992196	0.994423	-0.338016	-1.46328	0.14339	0.198282	5.10452	3.60896	3.92604	5.08442	4.87906	329307	A430110L20Rik	1	0.354642	0.441818	0.986165	0.855324	329307	A430110L20Rik	0.965552	0.170801	0.109988	0.425115
382036	A530010L16Rik	-3.14336	0.000605531	0.00247611	-0.708231	0.562435	0.653586	-0.274841	0.845902	0.888885	0.480242	0.726499	0.813963	382036	A530010L16Rik	-3.14336	-3.42912	0.000605536	0.00247613	-3.85159	-3.59371	0.000326005	0.000858647	-4.12643	-3.56328	0.000366256	0.000644033	-3.64619	-3.58522	0.000336792	0.00069496	2.0772	0.865265	0.750783	0.715783	0.768271	382036	A530010L16Rik	1	0.431689	0.398757	0.389199	0.40362	382036	A530010L16Rik	0.273726	0.0152436	0	0
329562	A530013C23Rik	0.319667	0.360215	0.527576	-0.0882457	0.806132	0.857073	0.470604	0.191572	0.267257	-0.136969	0.692153	0.78682	329562	A530013C23Rik	0.319668	0.914957	0.360214	0.527578	0.231422	0.643846	0.519676	0.736835	0.702026	2.00463	0.0450028	0.0631555	0.565057	1.63785	0.101452	0.14545	3.86336	4.00966	3.97353	4.24783	4.1838	329562	A530013C23Rik	0.766061	0.847819	0.826854	1	0.95659	329562	A530013C23Rik	0.282559	0.166611	0.289682	0.248811
381287	A530032D15Rik	0.860853	0.00790406	0.0242926	3.94577	7.94803e-48	1.31734e-46	0.874941	0.000125044	0.000314281	-1.16859	3.17292e-07	1.43456e-06	381287	A530032D15Rik	0.860854	2.65614	0.00790401	0.0242925	4.80662	16.5848	8.98046e-62	1.56339e-60	5.68156	19.6804	3.17551e-86	3.4935e-85	4.51298	15.5521	1.53995e-54	1.63539e-53	5.24315	5.56832	7.90397	8.54257	7.70069	381287	A530032D15Rik	0.101573	0.127251	0.642335	1	0.557918	381287	A530032D15Rik	0.282937	0.36465	6.8293	7.43094
621875	A530040E14Rik	0.321036	0.109302	0.214846	3.82146	4.13713e-113	1.96777e-111	0.32363	0.0126418	0.0234906	-1.20169	1.18981e-19	1.47695e-18	621875	A530040E14Rik	0.321036	1.60134	0.109302	0.214845	4.1425	24.5144	1.03666e-132	4.19868e-131	4.46613	26.4737	1.94671e-154	4.18309e-153	3.26443	19.0829	3.50474e-81	5.66893e-80	6.09535	6.24428	8.58869	8.82462	7.97652	621875	A530040E14Rik	0.150802	0.167201	0.849136	1	0.555516	621875	A530040E14Rik	0.959889	1.06911	14.9223	12.7975
328830	A530064D06Rik	-0.626773	8.41813e-05	0.000406907	-0.24404	0.162857	0.237543	1.6875	2.63571e-24	2.39411e-23	0.220665	0.130113	0.212708	328830	A530064D06Rik	-0.626773	-3.93217	8.41818e-05	0.00040691	-0.870813	-5.23256	1.67176e-07	5.85663e-07	0.816691	5.46351	4.66805e-08	1.04995e-07	1.03736	7.08597	1.38076e-12	4.94955e-12	6.99229	6.61006	6.46748	7.53301	7.67978	328830	A530064D06Rik	0.620934	0.476411	0.431581	0.903272	1	328830	A530064D06Rik	3.74413	1.76397	1.12383	2.81992
100415915	A530072M11Rik	-1.10481	0.00310388	0.0107132	1.5662	3.03206e-05	8.54267e-05	-0.389422	0.252363	0.338555	-0.688465	0.0636508	0.115948	100415915	A530072M11Rik	-1.1048	-2.95726	0.00310389	0.0107132	0.461394	1.44094	0.149601	0.258308	0.0719721	0.212853	0.831441	0.860125	-0.616493	-1.74624	0.0807693	0.118103	3.97456	3.41545	4.22625	3.9892	3.6326	100415915	A530072M11Rik	0.839915	0.570067	1	0.848477	0.662667	100415915	A530072M11Rik	0.46094	0.134764	0.24175	0.323441
664702	A530088E08Rik	-3.00178	1.10358e-13	1.33739e-12	1.25412	0.00549038	0.011357	1.27613	0.000284694	0.000683999	0.432016	0.142644	0.229447	664702	A530088E08Rik	-3.00178	-7.42787	1.10359e-13	1.3374e-12	-1.74767	-5.26714	1.38567e-07	4.87675e-07	-0.471533	-1.63653	0.101728	0.134177	-0.0395175	-0.145997	0.883923	0.912408	4.84739	3.31661	3.81621	4.52379	4.81398	664702	A530088E08Rik	1	0.346089	0.489308	0.799069	0.977107	664702	A530088E08Rik	0.871892	0.0794533	0.287799	0.296633
319997	A630001G21Rik	0.0477104	0.711136	0.82337	1.21652	2.72774e-21	2.08648e-20	0.715202	2.0814e-08	7.55368e-08	-1.01822	1.52492e-15	1.42866e-14	319997	A630001G21Rik	0.0477107	0.370332	0.711135	0.823368	1.26424	9.86112	6.13584e-23	4.41523e-22	1.97944	15.4633	6.13637e-54	4.38355e-53	0.961222	7.49301	6.73107e-14	2.56192e-13	10.8115	10.8435	11.6134	12.115	11.4225	319997	A630001G21Rik	0.405139	0.41423	0.706341	1	0.618785	319997	A630001G21Rik	39.0968	32.2476	61.0705	71.817
414091	A630001O12Rik	0.658601	0.0418575	0.100356	-1.13672	0.00150849	0.00341861	-0.781873	0.0810414	0.126181	-0.621845	0.227709	0.336911	414091	A630001O12Rik	0.658602	2.03494	0.0418573	0.100355	-0.478123	-1.31084	0.189911	0.318353	-1.26	-2.99258	0.00276633	0.00450717	-1.88184	-4.22924	2.34486e-05	5.40085e-05	3.84557	4.24312	3.5558	3.19665	2.90406	414091	A630001O12Rik	0.759147	1	0.621008	0.484151	0.395278	414091	A630001O12Rik	0.321324	0.308092	0.0811626	0.0784254
100504594	A630012P03Rik	-0.940435	0.48312	0.644356	3.37582	0.00294297	0.00638906	4.13264	5.59923e-16	3.299e-15	-1.42963	4.07506e-06	1.61213e-05	100504594	A630012P03Rik	-0.940437	-0.701296	0.483118	0.644354	2.43538	2.50157	0.0123643	0.0265106	6.56802	7.48566	7.11872e-14	2.04795e-13	5.13839	5.80316	6.50771e-09	1.92056e-08	1.74877	1.74222	2.26871	4.652	3.65914	100504594	A630012P03Rik	0.133672	0.133066	0.191671	1	0.502479	100504594	A630012P03Rik	0.0180371	0	0.104787	0.675021
320642	A630066F11Rik	-0.781008	0.000145608	0.000674456	-0.673305	0.00658209	0.0134068	-0.316054	0.274524	0.363838	0.904211	0.000856584	0.00240932	320642	A630066F11Rik	-0.781008	-3.79844	0.000145609	0.000674459	-1.45431	-6.25388	4.00378e-10	1.66371e-09	-1.77037	-6.96754	3.22531e-12	8.7598e-12	-0.866156	-4.1292	3.64034e-05	8.23595e-05	5.56425	5.06656	4.67392	4.50428	5.02083	320642	A630066F11Rik	1	0.708241	0.539489	0.479641	0.68614	320642	A630066F11Rik	2.35614	0.796753	0.412291	0.239032
320770	A630072M18Rik	0.32254	0.0209655	0.0562433	1.57849	1.90826e-31	2.05432e-30	-0.938764	2.65949e-12	1.27189e-11	-1.46422	5.03181e-24	8.15632e-23	320770	A630072M18Rik	0.322541	2.30861	0.0209654	0.056243	1.90104	14.0509	7.61119e-45	9.76416e-44	0.962272	6.94029	3.91286e-12	1.0586e-11	-0.501943	-3.44155	0.000578391	0.00116244	7.80417	8.00712	9.07311	8.41059	7.50577	320770	A630072M18Rik	0.414964	0.477645	1	0.631775	0.33743	320770	A630072M18Rik	1.85407	1.7399	4.58351	1.44556
320586	A630089N07Rik	-0.558373	0.0765623	0.162391	0.275227	0.413801	0.51259	0.253568	0.446182	0.542595	-0.353085	0.286867	0.405633	320586	A630089N07Rik	-0.558372	-1.77099	0.0765626	0.162392	-0.283145	-0.903224	0.366407	0.557775	-0.0295769	-0.0950732	0.924257	0.939157	-0.382662	-1.22602	0.220191	0.290748	4.29441	3.98983	4.13041	4.28201	4.06585	320586	A630089N07Rik	1	0.80968	0.892552	0.991443	0.853486	320586	A630089N07Rik	0.717727	0.284434	0.258583	0.265479
319916	A730011C13Rik	-0.422984	0.0439385	0.104365	0.507244	0.0204189	0.0377141	0.811043	5.07368e-05	0.000133843	0.121192	0.503776	0.626825	319916	A730011C13Rik	-0.422983	-2.01468	0.0439387	0.104365	0.0842606	0.415564	0.677729	0.89698	0.895304	4.70053	2.59484e-06	5.30351e-06	1.0165	5.51917	3.40614e-08	9.63063e-08	5.3848	5.15633	5.44803	5.9615	6.04292	319916	A730011C13Rik	0.633701	0.540891	0.662094	0.945126	1	319916	A730011C13Rik	1.4402	0.68384	0.642195	1.02832
613258	A730017L22Rik	-0.417965	0.00177901	0.00653184	-1.1532	2.1159e-12	1.04438e-11	0.575087	0.00116983	0.002585	0.582175	0.000195231	0.000609197	613258	A730017L22Rik	-0.417965	-3.12484	0.00177901	0.00653187	-1.57117	-9.91396	3.61992e-23	2.62289e-22	-0.99608	-6.66442	2.6572e-11	6.91646e-11	-0.413905	-3.07186	0.00212729	0.00399337	6.92354	6.63694	5.94249	6.28059	6.64917	613258	A730017L22Rik	1	0.819829	0.506612	0.640402	0.826808	613258	A730017L22Rik	3.39967	1.89157	0.725053	0.812697
100504703	A730063M14Rik	-0.702262	0.00147348	0.00551718	-0.534734	0.0267229	0.0480406	-0.391592	0.139565	0.203116	0.572308	0.0277442	0.0563388	100504703	A730063M14Rik	-0.702261	-3.17985	0.00147349	0.00551721	-1.237	-5.3114	1.08783e-07	3.85934e-07	-1.62859	-6.60539	3.96474e-11	1.02551e-10	-1.05628	-4.64958	3.32615e-06	8.20317e-06	6.31576	5.84191	5.49699	5.2989	5.6324	100504703	A730063M14Rik	1	0.720039	0.566923	0.49419	0.622713	100504703	A730063M14Rik	11.8924	5.74376	5.12936	2.73106
654800	A730085K08Rik	-1.73996	0.210308	0.356386	0.254065	0.871	0.906219	0.494719	0.745014	0.807634	0.349249	0.803804	0.870461	654800	A730085K08Rik	-1.73996	-1.25272	0.210307	0.356385	-1.48589	-1.0707	0.284305	0.451819	-0.991174	-0.740039	0.459276	0.520883	-0.641924	-0.509697	0.610263	0.687733	0.406264	0.10449	0.129567	0.215421	0.211748	654800	A730085K08Rik	1	0.811254	0.825479	0.876094	0.873866	654800	A730085K08Rik	0.125686	0.251977	0.0608481	0.117592
319798	A730090N16Rik	0.364827	0.459959	0.624061	1.22357	0.00589958	0.0121231	0.74753	0.0451906	0.075131	-1.68631	4.7022e-05	0.000160957	319798	A730090N16Rik	0.364828	0.738916	0.459958	0.62406	1.5884	3.55303	0.000380821	0.000995229	2.33593	5.42155	5.90853e-08	1.3223e-07	0.649621	1.34814	0.177613	0.240117	2.66101	2.80865	3.36679	3.84039	2.94118	319798	A730090N16Rik	0.441543	0.489123	0.720165	1	0.536181	319798	A730090N16Rik	0.154313	0.257807	0.498048	0.481251
231570	A830010M20Rik	-0.199259	0.332248	0.498518	-0.187347	0.38344	0.483218	-0.122946	0.583299	0.669776	0.0853324	0.701765	0.79417	231570	A830010M20Rik	-0.199258	-0.969594	0.332249	0.49852	-0.386605	-1.83697	0.0662137	0.124239	-0.509551	-2.3692	0.0178268	0.0265182	-0.424219	-2.02888	0.0424702	0.0656921	6.34074	6.22064	6.09689	6.03277	6.07111	231570	A830010M20Rik	1	0.920123	0.844488	0.807776	0.829529	231570	A830010M20Rik	0.847638	0.490806	0.259982	0.231511
402767	A830052D11Rik	-0.441259	0.505181	0.663042	-1.5998	0.0702467	0.114128	-2.54149	0.0516233	0.0845892	3.27308	0.00792453	0.0183144	402767	A830052D11Rik	-0.441258	-0.666357	0.505183	0.663044	-2.04106	-2.38393	0.0171289	0.0358964	-4.58254	-3.93023	8.48648e-05	0.000156659	-1.30946	-1.76846	0.0769845	0.113061	1.72759	1.51749	1.04792	0.773744	1.21714	402767	A830052D11Rik	1	0.864476	0.624306	0.516253	0.702003	402767	A830052D11Rik	0.0944316	0.0315528	0.0304779	0
68162	A930003A15Rik	3.61847	8.55297e-12	9.10454e-11	0.391002	0.191952	0.272539	-0.624291	0.0505767	0.0830911	0.298058	0.356866	0.480569	68162	A930003A15Rik	3.61848	6.82897	8.55271e-12	9.10427e-11	4.00948	7.59896	2.98526e-14	1.51484e-13	3.38519	6.2569	3.92706e-10	9.7122e-10	3.68324	6.94801	3.70466e-12	1.29912e-11	2.77126	4.22844	4.48236	4.12321	4.30467	68162	A930003A15Rik	0.305428	0.83862	1	0.779628	0.884123	68162	A930003A15Rik	0.031589	0.506638	0.917585	0.354656
68161	A930005H10Rik	-0.320196	0.0221733	0.0589307	-0.525601	0.00068898	0.00164175	-0.711617	8.78191e-05	0.000224973	-0.0727986	0.704653	0.796537	68161	A930005H10Rik	-0.320195	-2.28739	0.0221734	0.0589303	-0.845796	-5.64281	1.67298e-08	6.26215e-08	-1.55741	-9.21878	3.00502e-20	1.0641e-19	-1.63021	-10.0239	1.19694e-23	6.3762e-23	6.87131	6.64858	6.31276	5.88442	5.83727	68161	A930005H10Rik	1	0.85694	0.678983	0.504563	0.488339	68161	A930005H10Rik	4.52837	2.71341	1.51869	0.757406
100503120	A930006K02Rik	0.01862	0.940836	0.968204	0.0579695	0.824726	0.871059	0.847576	0.000758048	0.00172115	0.379929	0.0929873	0.159917	100503120	A930006K02Rik	0.0186204	0.0742213	0.940834	0.965285	0.0765899	0.300147	0.764065	0.964684	0.924166	3.8448	0.000120651	0.000220141	1.30409	5.66865	1.43929e-08	4.15374e-08	4.92485	4.93836	4.9502	5.48559	5.74133	100503120	A930006K02Rik	0.567826	0.573168	0.57789	0.837558	1	100503120	A930006K02Rik	1.91495	1.30693	0.749553	1.79163
432999	A930007A09Rik	-0.502405	0.0461124	0.108419	-0.308414	0.285547	0.381183	0.169915	0.57929	0.666316	0.771807	0.00532301	0.0127842	432999	A930007A09Rik	-0.502405	-1.99436	0.0461126	0.108419	-0.810819	-2.98931	0.00279607	0.00658175	-0.640903	-2.35647	0.0184495	0.0274117	0.130904	0.55138	0.581373	0.661977	4.7693	4.46457	4.28619	4.38458	4.83647	432999	A930007A09Rik	0.954511	0.772767	0.682886	0.731086	1	432999	A930007A09Rik	0.632043	0.363961	0.15625	0.239052
77779	A930007I19Rik	-0.334793	0.506743	0.664549	-0.148068	0.793478	0.846894	2.04589	5.26085e-05	0.000138547	-0.636928	0.123794	0.204032	77779	A930007I19Rik	-0.334792	-0.663917	0.506744	0.664546	-0.48286	-0.906801	0.364512	0.555444	1.56303	3.58303	0.000339627	0.000598227	0.926101	2.07613	0.037882	0.0592132	2.7652	2.66654	2.55376	3.61388	3.25381	77779	A930007I19Rik	0.555292	0.518587	0.479593	1	0.779128	77779	A930007I19Rik	0.245623	0.0923298	0	0.244167
227923	A930012O16Rik	-0.413802	0.50759	0.665219	0.0837195	0.900787	0.927922	-0.103585	0.882607	0.916529	-0.359118	0.62033	0.727359	227923	A930012O16Rik	-0.4138	-0.662594	0.507591	0.66522	-0.330081	-0.520407	0.60278	0.825303	-0.433666	-0.660299	0.509062	0.569708	-0.792784	-1.20068	0.229876	0.301792	2.13265	1.91952	1.96978	1.9549	1.82452	227923	A930012O16Rik	1	0.862661	0.893247	0.884079	0.807686	227923	A930012O16Rik	0.277097	0.0757536	0.243909	0.0942734
68074	A930013F10Rik	0.0966395	0.642279	0.774131	0.355944	0.0874509	0.13893	-0.76876	0.000274994	0.00066201	-0.181263	0.397039	0.522585	68074	A930013F10Rik	0.09664	0.464518	0.642277	0.774129	0.452584	2.17896	0.0293347	0.0591282	-0.316176	-1.49777	0.134193	0.173133	-0.497439	-2.36363	0.0180968	0.0298978	8.08639	8.13483	8.37308	7.86929	7.75779	68074	A930013F10Rik	0.819776	0.847772	1	0.705248	0.6528	68074	A930013F10Rik	5.78966	4.69256	6.49545	2.4014
77810	A930015D03Rik	-1.14942	7.13229e-08	5.25252e-07	4.30548	1.99503e-104	8.46323e-103	-0.142567	0.318741	0.411788	-0.808021	3.22459e-08	1.62161e-07	77810	A930015D03Rik	-1.14942	-5.38781	7.1323e-08	5.25253e-07	3.15606	19.4632	2.25268e-84	5.39286e-83	3.0135	18.4759	3.22793e-76	3.11233e-75	2.20547	13.3705	8.99609e-41	7.22586e-40	6.36085	5.82248	8.36741	8.27073	7.71103	77810	A930015D03Rik	0.248866	0.171356	1	0.935183	0.63447	77810	A930015D03Rik	3.33879	1.1156	21.4657	14.3277
328399	A930018M24Rik	-1.48978	0.0104185	0.0308209	-4.72698	4.82504e-05	0.000132518	0	1	1	2.56439	0.0449425	0.0860257	328399	A930018M24Rik	-1.48977	-2.56162	0.0104186	0.0308211	-6.21675	-5.48037	4.24428e-08	1.54781e-07	-6.03242	-5.31787	1.04988e-07	2.32146e-07	-3.46803	-4.40391	1.06316e-05	2.52149e-05	2.75364	1.92115	0.931477	0.963701	1.23787	328399	A930018M24Rik	1	0.561561	0.282797	0.289184	0.349709	328399	A930018M24Rik	0.417234	0.174265	0	0
77806	A930019D19Rik	0.815624	0.111754	0.218766	1.06874	0.0255675	0.0462176	-1.53938	0.00267413	0.00556748	0.348138	0.515635	0.637079	77806	A930019D19Rik	0.815625	1.59036	0.111753	0.218765	1.88437	3.80433	0.000142189	0.000388262	0.344989	0.633412	0.526465	0.586124	0.693127	1.3354	0.181746	0.245179	3.12307	3.53044	4.12815	3.26236	3.43503	77806	A930019D19Rik	0.498243	0.660802	1	0.548747	0.618515	77806	A930019D19Rik	0.445544	0.372178	1.04255	0.13895
109202	A930024E05Rik	-4.02566	1.17014e-14	1.51387e-13	0.337176	0.604469	0.690922	-1.19206	0.144366	0.209211	1.99781	0.00929264	0.0210787	109202	A930024E05Rik	-4.02566	-7.71925	1.17015e-14	1.51388e-13	-3.68848	-7.24654	4.27552e-13	2.07563e-12	-4.88054	-6.80048	1.04271e-11	2.7688e-11	-2.88273	-6.75465	1.43178e-11	4.87131e-11	4.49399	2.23292	2.34993	2.05435	2.64883	109202	A930024E05Rik	1	0.208618	0.226243	0.18433	0.278324	109202	A930024E05Rik	1.44453	0.0376104	0.0726582	0
320700	A930033H14Rik	-1.64568	2.75368e-06	1.66001e-05	-0.156119	0.711824	0.782847	-0.350653	0.460444	0.556661	0.0590802	0.902736	0.93623	320700	A930033H14Rik	-1.64568	-4.68839	2.75369e-06	1.66002e-05	-1.8018	-4.82926	1.3704e-06	4.49388e-06	-2.15245	-5.21615	1.8268e-07	3.99268e-07	-2.09337	-5.45656	4.85459e-08	1.36114e-07	4.2177	3.23929	3.16404	3.01778	3.04522	320700	A930033H14Rik	1	0.507541	0.481744	0.4353	0.443657	320700	A930033H14Rik	0.58703	0.168126	0.0463995	0.0448347
78443	A930041C12Rik	-2.25431	0.0578208	0.129773	2.27989	0.0616771	0.101732	0.534011	0.546223	0.635609	-0.427764	0.620039	0.727128	78443	A930041C12Rik	-2.25431	-1.89705	0.0578209	0.129773	0.0255861	0.0293479	0.976587	0.98668	0.559597	0.665806	0.505535	0.566432	0.131833	0.155208	0.876657	0.907267	0.983189	0.612563	0.983465	1.12122	1.03332	78443	A930041C12Rik	0.908762	0.702879	0.908935	1	0.940897	78443	A930041C12Rik	0.132474	0.066396	0.0641341	0.185914
433100	AA388235	0.101564	0.632912	0.76652	-1.16886	6.24303e-07	2.1001e-06	-2.28422	2.19585e-10	9.26259e-10	0.175891	0.671005	0.76946	433100	AA388235	0.101565	0.477635	0.63291	0.766517	-1.0673	-4.58376	4.56682e-06	1.43271e-05	-3.35151	-9.68468	3.50308e-22	1.31125e-21	-3.17562	-10.2358	1.37027e-24	7.47625e-24	5.88727	5.9545	5.12982	3.99949	4.06614	433100	AA388235	0.954469	1	0.564608	0.257919	0.270114	433100	AA388235	0.9934	0.922024	0.311715	0.0258173
613254	AA465934	-0.501764	0.122055	0.234261	0.191493	0.573339	0.663359	-0.354092	0.319577	0.412643	0.244798	0.490602	0.614214	613254	AA465934	-0.501763	-1.5462	0.122055	0.234262	-0.31027	-0.953756	0.340207	0.524489	-0.664361	-1.94858	0.0513451	0.071384	-0.419563	-1.29242	0.196211	0.262519	4.76105	4.44396	4.51661	4.35758	4.50196	613254	AA465934	1	0.802686	0.844139	0.756036	0.83561	613254	AA465934	4.48044	1.83315	3.18725	1.02659
433470	AA467197	1.30278	5.86839e-09	4.84332e-08	3.70849	2.44469e-73	6.5818e-72	2.23153	1.31956e-30	1.53307e-29	-0.778016	5.73876e-05	0.00019407	433470	AA467197	1.30278	5.82047	5.86838e-09	4.84331e-08	5.01127	23.3306	2.16698e-120	7.63872e-119	7.2428	33.828	7.65218e-251	3.21132e-249	6.46478	30.1826	4.01006e-200	2.08752e-198	7.74623	8.19687	10.2865	11.9291	11.331	433470	AA467197	0.0550577	0.0752447	0.320281	1	0.660617	433470	AA467197	4.50173	5.8496	88.9521	247.145
767812	AA474408	0.26507	0.247076	0.401306	-0.457104	0.0600066	0.099269	0.190119	0.456573	0.552961	-0.371676	0.147082	0.235424	767812	AA474408	0.26507	1.15748	0.247076	0.401305	-0.192034	-0.792906	0.427832	0.633261	-0.00191437	-0.00790862	0.99369	0.995548	-0.37359	-1.53591	0.12456	0.174741	5.25006	5.41307	5.11217	5.25092	5.02107	767812	AA474408	0.89316	1	0.81175	0.893693	0.762072	767812	AA474408	0.651105	0.505292	0.498246	0.422491
100504672	AA666905	-2.0949	0.000186569	0.000844771	-1.16323	0.166029	0.241273	0.661283	0.471972	0.567495	1.07118	0.14486	0.232522	100504672	AA666905	-2.0949	-3.73654	0.00018657	0.000844775	-3.25813	-4.30017	1.70669e-05	5.10796e-05	-2.59685	-3.85122	0.000117531	0.000214692	-1.52567	-2.94528	0.00322665	0.00592915	2.82201	1.82982	1.54758	1.69318	2.04458	100504672	AA666905	1	0.502713	0.413389	0.457287	0.583406	100504672	AA666905	0.333523	0.0786645	0.0189961	0.0550665
100503467	AA667203	0.673685	0.0666903	0.145584	-1.79204	4.96308e-06	1.53197e-05	-1.36441	0.00424062	0.00853891	0.327525	0.513578	0.635613	100503467	AA667203	0.673686	1.83376	0.0666898	0.145583	-1.11835	-2.8323	0.00462148	0.0105605	-2.48277	-5.43372	5.51914e-08	1.23619e-07	-2.15524	-5.08204	3.73397e-07	9.85619e-07	5.12961	5.55261	4.3574	3.77176	3.85546	100503467	AA667203	0.745871	1	0.436721	0.291012	0.308394	100503467	AA667203	0.352116	0.397082	0.14916	0.0308849
212439	AA986860	-0.434329	0.0892141	0.182728	-0.278235	0.343533	0.443101	0.776335	0.00765241	0.0147522	-0.0743584	0.776921	0.852013	212439	AA986860	-0.434329	-1.69956	0.0892143	0.182728	-0.712564	-2.58676	0.00968828	0.0211243	0.0637705	0.252552	0.800615	0.833114	-0.0105879	-0.0432159	0.965529	0.972976	4.57033	4.32342	4.16995	4.5881	4.56291	212439	AA986860	0.987763	0.832383	0.748383	1	0.982692	212439	AA986860	0.464638	0.245134	0.201265	0.274556
223921	Aaas	-3.933e-05	0.999624	1	-0.493729	1.26748e-08	4.89406e-08	-0.805601	2.50297e-17	1.58927e-16	-0.115835	0.243105	0.355163	223921	Aaas	-3.92331e-05	-0.000470274	0.999625	0.99987	-0.493768	-5.74268	9.319e-09	3.54572e-08	-1.29937	-14.1077	3.40707e-45	2.10057e-44	-1.4152	-15.6375	4.04337e-55	4.34728e-54	9.28312	9.28339	8.95092	8.43556	8.36717	223921	Aaas	0.999811	1	0.794171	0.555618	0.529894	223921	Aaas	20.2525	16.3941	9.15998	4.28809
78894	Aacs	-0.0310963	0.76346	0.859777	0.259456	0.0124459	0.0240344	1.23634	1.68655e-33	2.15045e-32	0.291564	0.0038274	0.00948216	78894	Aacs	-0.0310961	-0.300938	0.763461	0.859778	0.22836	2.21121	0.027021	0.0547987	1.4647	14.3579	9.50632e-47	6.0298e-46	1.75626	17.2861	5.98424e-67	7.78188e-66	10.1644	10.1466	10.3036	11.1242	11.3297	78894	Aacs	0.445877	0.440406	0.49104	0.867194	1	78894	Aacs	14.4721	11.1695	11.7007	24.4896
66129	Aaed1	-0.0522031	0.755164	0.853459	-0.866599	7.26571e-07	2.42386e-06	-1.63212	3.10323e-15	1.75779e-14	1.20374	8.58006e-09	4.57942e-08	66129	Aaed1	-0.0522027	-0.311836	0.755165	0.853458	-0.918802	-5.29052	1.21967e-07	4.31317e-07	-2.55092	-12.7135	4.97671e-37	2.6235e-36	-1.34718	-7.64353	2.11354e-14	8.2038e-14	7.7463	7.70014	7.11628	6.15812	6.85737	66129	Aaed1	1	0.968511	0.646168	0.332591	0.540017	66129	Aaed1	14.5644	10.491	3.40148	1.78033
66939	Aagab	-0.189394	0.0454893	0.107234	-1.62021	9.13461e-62	2.06001e-60	0.0750751	0.455544	0.552149	1.24491	9.63679e-37	2.95233e-35	66939	Aagab	-0.189394	-2.0001	0.0454895	0.107234	-1.8096	-18.5806	4.61285e-77	9.98326e-76	-1.73453	-17.7547	1.58387e-70	1.4286e-69	-0.489612	-5.15239	2.57181e-07	6.86679e-07	11.1632	11.0304	9.98865	10.032	10.8286	66939	Aagab	1	0.912048	0.44303	0.456558	0.793034	66939	Aagab	50.7545	34.2971	9.471	8.80601
269774	Aak1	0.0174993	0.885313	0.93458	-0.431721	0.000440258	0.0010782	0.348429	0.0048212	0.00963749	0.232394	0.0576054	0.10666	269774	Aak1	0.0174995	0.144239	0.885311	0.931693	-0.414221	-3.38267	0.000717839	0.00181921	-0.0657926	-0.538795	0.590028	0.646325	0.166601	1.37428	0.169355	0.230182	9.9367	9.94124	9.66744	9.89391	10.0442	269774	Aak1	0.928165	0.931091	0.770143	0.90104	1	269774	Aak1	2.84995	2.30756	1.08599	1.23171
66273	Aamdc	0.162853	0.213201	0.359908	-0.601435	1.27426e-05	3.75107e-05	-1.36396	3.05468e-16	1.83281e-15	-0.0670602	0.713237	0.803632	66273	Aamdc	0.162853	1.24481	0.2132	0.359907	-0.438582	-3.20169	0.00136626	0.0033438	-1.80255	-11.1794	5.14415e-29	2.28719e-28	-1.86961	-12.013	3.0349e-33	2.06811e-32	7.41146	7.51387	7.11251	6.28205	6.23617	66273	Aamdc	0.931477	1	0.757143	0.425779	0.412452	66273	Aamdc	10.1171	7.38647	5.39933	1.56517
227290	Aamp	0.345055	0.00208639	0.00751007	-0.17766	0.11338	0.174147	-0.13613	0.225981	0.308275	0.07918	0.481197	0.604922	227290	Aamp	0.345056	3.07765	0.00208638	0.00751012	0.167396	1.49165	0.135791	0.236748	0.0312654	0.27833	0.780759	0.815832	0.110445	0.984355	0.324941	0.407414	12.3911	12.612	12.4977	12.4114	12.4605	227290	Aamp	0.858047	1	0.923864	0.870215	0.900296	227290	Aamp	126.662	124.067	107.464	79.3016
11298	Aanat	2.59538	0.000242467	0.00107437	0.670159	0.197577	0.279561	0.880714	0.0717553	0.113307	-1.47003	0.0035625	0.008879	11298	Aanat	2.59538	3.67009	0.000242464	0.00107436	3.26553	4.68866	2.74998e-06	8.80543e-06	4.14625	6.05352	1.41712e-09	3.41592e-09	2.67622	3.78354	0.000154614	0.000329884	2.22907	3.10693	3.40805	3.96768	3.14897	11298	Aanat	0.299659	0.550665	0.678475	1	0.566947	11298	Aanat	0.0977848	0.196039	0.686433	0.297334
68295	Aar2	0.0631325	0.529396	0.6826	0.843118	3.1938e-17	2.0378e-16	-0.0553669	0.577156	0.664542	-0.313486	0.00164854	0.00438028	68295	Aar2	0.0631327	0.62893	0.529395	0.682599	0.906251	9.11052	8.19892e-20	5.27271e-19	0.850884	8.52719	1.49941e-17	4.87854e-17	0.537398	5.38603	7.20305e-08	1.99411e-07	9.9637	10.006	10.5585	10.5216	10.3112	68295	Aar2	0.662152	0.681835	1	0.974791	0.842467	68295	Aar2	12.0281	9.19672	15.2054	11.2442
234734	Aars	0.265004	0.000977846	0.00383576	0.431528	7.7142e-08	2.797e-07	0.232138	0.00378419	0.00768491	0.428215	8.22258e-08	3.97079e-07	234734	Aars	0.265004	3.29683	0.00097784	0.00383574	0.696532	8.67744	4.04765e-18	2.43571e-17	0.92867	11.5727	5.66902e-31	2.64648e-30	1.35689	16.9697	1.37607e-64	1.73326e-63	11.7782	11.944	12.2206	12.3783	12.6698	234734	Aars	0.539006	0.604646	0.732444	0.81706	1	234734	Aars	30.7985	29.0865	27.8421	28.6654
224805	Aars2	-0.418475	2.41547e-05	0.000127455	-0.215441	0.0472116	0.080294	-0.0952268	0.411785	0.509048	0.519527	2.87821e-06	1.16482e-05	224805	Aars2	-0.418475	-4.22256	2.41547e-05	0.000127455	-0.633916	-6.11543	9.6294e-10	3.91048e-09	-0.729143	-6.80029	1.04406e-11	2.7719e-11	-0.209616	-2.13801	0.0325157	0.0514459	7.82383	7.55092	7.41056	7.35657	7.68767	224805	Aars2	1	0.827651	0.750922	0.723337	0.909937	224805	Aars2	3.83413	2.36349	1.33688	1.31166
69684	Aarsd1	0.00270548	0.978667	0.991398	-0.19717	0.0553402	0.0924753	-0.879828	4.95865e-16	2.93348e-15	0.0857048	0.439022	0.564078	69684	Aarsd1	0.00270563	0.0267412	0.978666	0.98846	-0.194464	-1.90157	0.0572276	0.108954	-1.07429	-10.0565	8.60173e-24	3.34516e-23	-0.988588	-9.4417	3.6677e-21	1.81345e-20	9.38995	9.38492	9.25775	8.69537	8.74799	69684	Aarsd1	1	0.996519	0.912441	0.617889	0.640843	69684	Aarsd1	26.317	17.6937	15.7484	7.03489
231326	Aasdh	-0.822824	7.31881e-14	8.96159e-13	-0.581025	7.06619e-06	2.14521e-05	0.225694	0.10359	0.156672	0.380801	0.00321779	0.00809361	231326	Aasdh	-0.822824	-7.48202	7.31885e-14	8.96164e-13	-1.40385	-11.5516	7.24622e-31	6.74208e-30	-1.17816	-9.75356	1.78117e-22	6.70933e-22	-0.797355	-7.20422	5.83779e-13	2.13309e-12	7.61648	7.07083	6.70273	6.84864	7.087	231326	Aasdh	1	0.685084	0.530805	0.587296	0.692808	231326	Aasdh	3.48567	1.44781	0.792474	0.774757
67618	Aasdhppt	-0.106929	0.228244	0.378874	-0.209976	0.0240753	0.0437977	-0.46973	3.02067e-06	9.04819e-06	0.353609	0.000432418	0.00127675	67618	Aasdhppt	-0.106929	-1.20489	0.228245	0.378874	-0.316905	-3.47225	0.00051611	0.00133161	-0.786635	-8.14277	3.86336e-16	1.19783e-15	-0.433026	-4.75128	2.0213e-06	5.0702e-06	8.54245	8.46932	8.33155	8.02874	8.25652	67618	Aasdhppt	1	0.950579	0.863999	0.70042	0.820215	67618	Aasdhppt	6.68007	5.25503	3.72	1.90163
56321	Aatf	0.183423	0.0261435	0.0678125	0.0895565	0.283499	0.379028	-0.456994	1.6245e-07	5.45532e-07	0.379245	1.31205e-05	4.86397e-05	56321	Aatf	0.183423	2.22407	0.0261434	0.0678123	0.272979	3.28882	0.00100609	0.00250432	-0.184015	-2.1332	0.0329087	0.047168	0.19523	2.35882	0.0183334	0.0302613	8.92337	9.04429	9.10064	8.80653	9.04993	56321	Aatf	0.884375	0.961693	1	0.815576	0.965464	56321	Aatf	12.6468	11.9641	10.2937	6.84059
11302	Aatk	-0.510713	2.32682e-07	1.60913e-06	-2.68194	3.22326e-95	1.18483e-93	0.426789	0.00416924	0.00840705	1.46127	4.6875e-30	1.06691e-28	11302	Aatk	-0.510713	-5.17113	2.32683e-07	1.60914e-06	-3.19266	-24.9801	1.00584e-137	4.28368e-136	-2.76587	-22.4623	9.7102e-112	1.40859e-110	-1.3046	-12.6684	8.85382e-37	6.49623e-36	8.944	8.58088	6.90497	7.1415	8.03357	11302	Aatk	1	0.77748	0.243328	0.286679	0.532028	11302	Aatk	5.81569	3.14144	0.311837	0.469365
382062	AB124611	0.00720171	0.953132	0.975158	0.166001	0.176069	0.253375	1.34175	5.42708e-28	5.72085e-27	-0.125768	0.302171	0.422053	382062	AB124611	0.00720197	0.0587768	0.95313	0.972234	0.173203	1.41322	0.157591	0.270456	1.51495	12.4009	2.58433e-35	1.31407e-34	1.38918	11.3752	5.5564e-30	3.50471e-29	11.7054	11.7076	11.8094	12.707	12.6188	382062	AB124611	0.499444	0.500199	0.536787	1	0.94067	382062	AB124611	94.4884	71.7731	89.3543	165.221
11303	Abca1	0.448789	0.013013	0.0373912	-0.137076	0.448204	0.546408	0.397601	0.0278291	0.0483299	-0.174343	0.334675	0.456545	11303	Abca1	0.44879	2.48342	0.0130128	0.0373909	0.311714	1.72454	0.084611	0.154707	0.709315	3.92477	8.68122e-05	0.000160107	0.534972	2.96033	0.00307311	0.00565599	12.9794	13.2508	13.1636	13.4409	13.3262	11303	Abca1	0.726221	0.876532	0.825114	1	0.92356	11303	Abca1	41.7262	47.5291	22.3927	33.5477
11305	Abca2	-0.32653	0.0200166	0.0541052	-0.144194	0.309501	0.407271	-1.08144	1.61501e-13	8.34955e-13	0.254004	0.0867719	0.150991	11305	Abca2	-0.32653	-2.32603	0.0200167	0.0541055	-0.470724	-3.33737	0.000845761	0.00212657	-1.55216	-10.6947	1.07757e-26	4.52096e-26	-1.29816	-9.08874	1.00195e-19	4.71589e-19	9.63513	9.40961	9.30943	8.62478	8.78334	11305	Abca2	1	0.855283	0.797906	0.496425	0.554095	11305	Abca2	6.36284	4.12234	2.2772	0.887592
27410	Abca3	-0.220348	0.24979	0.40447	0.0679343	0.723461	0.793093	0.118257	0.538338	0.628359	0.525954	0.00605121	0.0143709	27410	Abca3	-0.220347	-1.15086	0.249791	0.404472	-0.152413	-0.795474	0.426338	0.631614	-0.0341561	-0.178215	0.858554	0.882775	0.491798	2.57461	0.0100352	0.0171903	10.2231	10.0648	10.1057	10.196	10.5434	27410	Abca3	0.800905	0.717661	0.738314	0.78602	1	27410	Abca3	10.5445	7.7575	4.21094	4.99719
217265	Abca5	0.574861	0.0126222	0.0364351	-0.133807	0.563022	0.654171	-1.71264	1.10085e-10	4.74307e-10	-1.22725	0.000149347	0.000473644	217265	Abca5	0.574862	2.49426	0.0126221	0.0364352	0.441054	1.89142	0.058568	0.111314	-1.27159	-4.80467	1.5501e-06	3.21606e-06	-2.49884	-8.39138	4.80479e-17	2.06962e-16	5.99549	6.37357	6.27773	5.21497	4.60012	217265	Abca5	0.769459	1	0.935726	0.447945	0.292508	217265	Abca5	0.51188	0.590723	0.266557	0.0965878
76184	Abca6	0.0863968	0.779362	0.869566	-1.18449	0.000474042	0.00115555	-2.42232	4.55927e-06	1.34263e-05	-2.34613	0.0164475	0.0352663	76184	Abca6	0.0863975	0.280153	0.77936	0.869564	-1.09809	-3.26401	0.00109847	0.0027223	-3.52041	-6.90937	4.86817e-12	1.31241e-11	-5.86654	-6.59687	4.19929e-11	1.39243e-10	4.82435	4.83725	4.08975	3.02212	2.55318	76184	Abca6	0.9911	1	0.595635	0.28418	0.205317	76184	Abca6	0.366885	0.330367	0.0903147	0.0174538
27403	Abca7	-0.236397	0.000130506	0.000610971	0.893417	1.58075e-47	2.60351e-46	0.673128	9.98353e-29	1.08294e-27	-0.003945	0.947539	0.967691	27403	Abca7	-0.236396	-3.8255	0.000130507	0.000610973	0.657021	10.7679	4.87993e-27	4.04034e-26	1.33015	21.9369	1.15482e-106	1.58509e-105	1.3262	21.9401	1.07768e-106	2.42183e-105	11.3407	11.1966	11.7589	12.2143	12.2113	27403	Abca7	0.545766	0.493892	0.729297	1	0.997881	27403	Abca7	16.2365	10.6358	16.8753	22.332
27404	Abca8b	0.311294	0.214594	0.361782	-0.52012	0.0463399	0.0789226	-0.406327	0.150148	0.216492	-0.830799	0.00681316	0.0159945	27404	Abca8b	0.311295	1.24103	0.214593	0.361781	-0.208825	-0.800396	0.423482	0.627898	-0.615152	-2.25378	0.0242102	0.0353794	-1.44595	-5.03063	4.88868e-07	1.27933e-06	5.50914	5.72161	5.37488	5.13214	4.67571	27404	Abca8b	0.863056	1	0.786361	0.664583	0.484342	27404	Abca8b	0.489379	0.380901	0.195112	0.123892
217262	Abca9	-0.229513	0.355646	0.522885	-0.0238308	0.923906	0.944977	-1.24202	9.9231e-07	3.10946e-06	-1.21831	3.61751e-06	1.44005e-05	217262	Abca9	-0.229513	-0.923691	0.355647	0.522884	-0.253343	-1.01808	0.308639	0.484264	-1.49536	-5.91469	3.32493e-09	7.8869e-09	-2.71367	-10.5098	7.7824e-26	4.40236e-25	8.85046	8.66961	8.64286	7.86481	7.15697	217262	Abca9	1	0.882186	0.865977	0.504999	0.309179	217262	Abca9	5.62366	3.73726	1.67035	0.870721
56199	Abcb10	-0.282937	0.000266162	0.00117157	0.417062	1.33829e-07	4.7546e-07	-0.436164	8.35407e-08	2.87178e-07	-0.437659	2.71976e-07	1.2414e-06	56199	Abcb10	-0.282937	-3.64618	0.000266163	0.00117191	0.134126	1.74797	0.0804691	0.147924	-0.302038	-3.77832	0.000157887	0.000285265	-0.739697	-9.16786	4.8248e-20	2.29454e-19	9.02444	8.83709	9.11494	8.82542	8.54748	56199	Abcb10	0.939197	0.824819	1	0.818176	0.674806	56199	Abcb10	6.77352	4.23948	4.47096	2.48855
18671	Abcb1a	0.116771	0.607493	0.747136	-0.261686	0.293843	0.390712	2.42603	2.83873e-28	3.03107e-27	-1.44043	3.82595e-15	3.47603e-14	18671	Abcb1a	0.116772	0.513656	0.607492	0.747135	-0.144914	-0.593876	0.552595	0.771604	2.28112	11.711	1.11928e-31	5.29589e-31	0.840686	3.97447	7.05349e-05	0.000155515	4.77509	4.83632	4.69469	6.23677	5.27431	18671	Abcb1a	0.363071	0.378811	0.343389	1	0.513182	18671	Abcb1a	0.264429	0.236408	0.0968777	0.601782
18669	Abcb1b	0.381965	4.90435e-06	2.86299e-05	-0.0103367	0.901868	0.92867	-1.20924	1.23349e-43	2.15121e-42	-1.4902	4.26434e-54	2.7331e-52	18669	Abcb1b	0.381965	4.56884	4.90431e-06	2.86297e-05	0.371628	4.4295	9.44533e-06	2.8901e-05	-0.837614	-9.61942	6.62043e-22	2.46035e-21	-2.32781	-24.9891	8.03844e-138	2.55769e-136	10.2056	10.4651	10.4579	9.65567	8.79034	18669	Abcb1b	0.835361	1	0.995001	0.57061	0.313218	18669	Abcb1b	14.4193	14.8807	11.4721	4.09087
18670	Abcb4	0.0465734	0.644347	0.776008	-0.0918955	0.36685	0.466354	-2.11435	1.61791e-78	6.97658e-77	-1.08483	6.63082e-17	6.91429e-16	18670	Abcb4	0.0465735	0.461631	0.644346	0.776007	-0.045322	-0.446794	0.655024	0.874864	-2.15967	-19.308	4.60237e-83	4.8667e-82	-3.2445	-26.989	1.98861e-160	7.5029e-159	9.68496	9.71857	9.64737	8.28943	7.71254	18670	Abcb4	0.976975	1	0.951845	0.371354	0.248957	18670	Abcb4	13.5643	10.4645	6.58375	1.56797
74104	Abcb6	-0.0654194	0.370518	0.537564	0.149051	0.0460383	0.0784941	0.0170237	0.822168	0.868948	0.145871	0.0506373	0.0954073	74104	Abcb6	-0.0654193	-0.895502	0.370519	0.537565	0.0836313	1.13996	0.254301	0.41038	0.100655	1.3582	0.174402	0.219856	0.246526	3.41366	0.000640975	0.00128211	9.256	9.21338	9.30754	9.31984	9.41744	74104	Abcb6	0.894136	0.868108	0.926654	0.934592	1	74104	Abcb6	10.0258	7.40072	6.6908	6.3177
11306	Abcb7	0.152235	0.190849	0.331023	-0.0777228	0.506078	0.602093	-0.571	1.42933e-06	4.40762e-06	-0.119588	0.316019	0.436854	11306	Abcb7	0.152235	1.30807	0.190848	0.331024	0.074512	0.638391	0.523219	0.74059	-0.496488	-4.20943	2.5602e-05	4.90897e-05	-0.616076	-5.24067	1.59995e-07	4.34311e-07	10.2577	10.3538	10.3039	9.93341	9.85584	11306	Abcb7	0.935599	1	0.96603	0.747246	0.708129	11306	Abcb7	11.5867	10.754	6.69185	4.0912
74610	Abcb8	-0.202839	0.00207668	0.0074831	-0.528661	3.95543e-14	2.1438e-13	-0.511215	2.2511e-11	1.01154e-10	0.513148	1.34375e-11	9.32226e-11	74610	Abcb8	-0.202839	-3.07904	0.00207669	0.00748312	-0.7315	-10.6499	1.74615e-26	1.41967e-25	-1.24272	-17.0791	2.1247e-65	1.79267e-64	-0.729567	-10.719	8.29049e-27	4.84816e-26	9.78692	9.64928	9.29782	8.97795	9.30039	74610	Abcb8	1	0.909005	0.712472	0.570789	0.713738	74610	Abcb8	16.5385	11.4241	6.05629	3.93909
56325	Abcb9	-0.247525	0.255727	0.411473	-1.19042	1.62741e-05	4.73035e-05	0.23404	0.456956	0.553254	0.661389	0.0188179	0.0398339	56325	Abcb9	-0.247525	-1.13655	0.255727	0.411474	-1.43795	-5.37663	7.58949e-08	2.71977e-07	-1.20391	-4.54456	5.50491e-06	1.10201e-05	-0.542518	-2.38334	0.0171566	0.0284329	5.04957	4.88949	4.22092	4.34049	4.7003	56325	Abcb9	1	0.894975	0.563055	0.611709	0.78498	56325	Abcb9	0.597443	0.374299	0.154949	0.119779
17250	Abcc1	0.111726	0.474201	0.63697	1.3726	1.35776e-18	9.2098e-18	-0.448602	0.00399614	0.00808395	-0.297384	0.0565053	0.104928	17250	Abcc1	0.111726	0.715663	0.474199	0.636969	1.48433	9.52042	1.72482e-21	1.18078e-20	1.03572	6.63921	3.15373e-11	8.18502e-11	0.73834	4.73307	2.21153e-06	5.5305e-06	12.1644	12.2287	13.1342	12.8304	12.6328	17250	Abcc1	0.510584	0.533842	1	0.810157	0.706439	17250	Abcc1	37.4571	32.6749	48.1464	34.5345
224814	Abcc10	-0.0783104	0.594341	0.736222	-0.958723	1.9224e-09	7.81506e-09	-0.234063	0.181526	0.255125	0.785428	3.25143e-06	1.30347e-05	224814	Abcc10	-0.0783102	-0.532554	0.594343	0.736223	-1.03703	-6.57589	4.83633e-11	2.11321e-10	-1.2711	-7.76185	8.36962e-15	2.47881e-14	-0.485668	-3.22662	0.0012526	0.00242101	7.44543	7.38097	6.77805	6.6339	7.11709	224814	Abcc10	1	0.956301	0.629649	0.569775	0.79645	224814	Abcc10	1.8255	1.49264	0.56103	0.443014
76408	Abcc3	-0.112454	0.196896	0.338869	-0.304561	0.000516866	0.00125409	-1.09777	2.13e-34	2.81655e-33	-0.782955	2.43265e-17	2.61186e-16	76408	Abcc3	-0.112453	-1.29045	0.196896	0.33887	-0.417015	-4.7655	1.8839e-06	6.11312e-06	-1.51478	-16.9841	1.07712e-64	9.01694e-64	-2.29774	-25.4607	5.37831e-143	1.80557e-141	11.5559	11.4777	11.2664	10.5559	10.0962	76408	Abcc3	1	0.947231	0.818204	0.500011	0.36356	76408	Abcc3	38.2856	26.4666	15.8016	7.1121
239273	Abcc4	-0.0586433	0.66762	0.79319	0.566109	3.42959e-05	9.59553e-05	0.794476	3.81243e-09	1.46595e-08	0.0463611	0.728128	0.81549	239273	Abcc4	-0.058643	-0.429415	0.667621	0.793192	0.507466	3.73752	0.000185841	0.000501183	1.30194	9.66156	4.39117e-22	1.63947e-21	1.3483	10.0381	1.0365e-23	5.53405e-23	9.19425	9.15485	9.51205	10.0451	10.0711	239273	Abcc4	0.54457	0.529897	0.678766	0.982195	1	239273	Abcc4	4.57362	3.381	3.53456	5.4815
27416	Abcc5	0.203705	0.0136877	0.0391318	1.08898	4.64585e-40	6.36867e-39	1.41757	4.54799e-68	1.54514e-66	-0.0902959	0.264362	0.380116	27416	Abcc5	0.203705	2.46536	0.0136876	0.0391317	1.29269	15.744	7.55538e-56	1.20437e-54	2.71026	33.1565	4.55833e-241	1.80015e-239	2.61996	32.0677	1.24262e-225	8.04767e-224	11.6673	11.7834	12.4513	13.4259	13.3611	27416	Abcc5	0.295538	0.32031	0.50889	1	0.956098	27416	Abcc5	19.475	18.0258	28.3823	66.0254
11666	Abcd1	-0.229087	0.0130975	0.0376201	-0.327536	0.000438786	0.00107528	-0.20802	0.0271227	0.047197	0.771509	1.61655e-16	1.6334e-15	11666	Abcd1	-0.229087	-2.4811	0.0130976	0.0376203	-0.556623	-5.9963	2.01859e-09	8.03629e-09	-0.764643	-8.19449	2.5166e-16	7.85272e-16	0.00686596	0.0744473	0.940655	0.953355	11.3846	11.2319	11.0151	10.8853	11.3885	11666	Abcd1	0.997288	0.897155	0.771975	0.705541	1	11666	Abcd1	43.2144	28.6621	15.5137	13.0335
26874	Abcd2	-0.701435	0.00297338	0.0103163	-2.6121	5.2882e-22	4.16894e-21	-0.466839	0.140411	0.204082	0.326711	0.302266	0.422148	26874	Abcd2	-0.701435	-2.97048	0.00297338	0.0103163	-3.31353	-12.3465	5.0861e-35	5.2327e-34	-3.78037	-13.1444	1.83157e-39	1.00991e-38	-3.45366	-12.8644	7.14384e-38	5.38571e-37	7.5611	7.04727	5.32934	5.14967	5.27859	26874	Abcd2	1	0.700359	0.212898	0.187969	0.205539	26874	Abcd2	2.54891	1.26786	0.0994657	0.0901043
19299	Abcd3	0.0514046	0.582895	0.726449	-0.175504	0.0639409	0.105014	-0.233994	0.0152666	0.0279544	0.258294	0.00721505	0.0168399	19299	Abcd3	0.0514047	0.549162	0.582894	0.726448	-0.124099	-1.31548	0.188348	0.316186	-0.358093	-3.75578	0.000172806	0.000311205	-0.0997988	-1.06153	0.288448	0.36777	10.0369	10.069	9.95287	9.80382	9.96843	19299	Abcd3	0.978001	1	0.922674	0.832105	0.932675	19299	Abcd3	16.9631	14.1507	8.29843	6.88285
19300	Abcd4	-0.630469	5.79102e-10	5.27389e-09	-0.68976	3.72327e-10	1.59499e-09	-0.354023	0.00313759	0.00644856	0.758875	7.66389e-11	4.94088e-10	19300	Abcd4	-0.630469	-6.19601	5.79107e-10	5.27393e-09	-1.32023	-12.3136	7.65205e-35	7.832e-34	-1.67425	-14.9172	2.54845e-50	1.71889e-49	-0.915376	-8.83538	9.97556e-19	4.54565e-18	8.88514	8.45529	8.01131	7.79624	8.2649	19300	Abcd4	1	0.742338	0.545695	0.47012	0.650561	19300	Abcd4	10.5286	5.12174	3.2164	1.85685
24015	Abce1	0.199702	0.0972635	0.195318	0.717533	2.38112e-09	9.63249e-09	-0.184221	0.125082	0.185023	-0.271445	0.0240447	0.0495183	24015	Abce1	0.199702	1.65827	0.0972631	0.195317	0.917235	7.63663	2.2298e-14	1.13672e-13	0.733014	6.09145	1.11895e-09	2.71062e-09	0.46157	3.83679	0.000124651	0.00026839	10.8099	10.9332	11.4062	11.2854	11.1009	24015	Abce1	0.66147	0.720458	1	0.919672	0.809249	24015	Abce1	21.7445	19.9921	22.6168	18.6597
224742	Abcf1	0.155219	0.00757655	0.0234223	0.309203	1.07029e-07	3.83985e-07	0.296246	3.33787e-07	1.0908e-06	-0.122066	0.0348802	0.0688436	224742	Abcf1	0.155219	2.67038	0.00757652	0.0234222	0.464423	7.99818	1.26269e-15	6.80222e-15	0.760669	13.1164	2.65154e-39	1.45753e-38	0.638603	11.0343	2.61173e-28	1.5871e-27	11.9358	12.0358	12.2361	12.4348	12.3525	224742	Abcf1	0.707585	0.758377	0.871334	1	0.944522	224742	Abcf1	53.6023	47.5169	51.0696	50.6679
27407	Abcf2	0.0889474	0.197293	0.339414	0.15986	0.0213958	0.0393518	0.653574	2.28874e-21	1.80523e-20	0.0822392	0.224201	0.332743	27407	Abcf2	0.0889475	1.2893	0.197293	0.339413	0.248808	3.60069	0.000317379	0.000836927	0.902382	13.1984	8.96546e-40	4.97074e-39	0.984621	14.5001	1.21041e-47	1.12366e-46	10.5254	10.5814	10.6816	11.1158	11.1723	27407	Abcf2	0.638633	0.663899	0.711642	0.96158	1	27407	Abcf2	25.8233	21.6173	18.5251	25.8287
27406	Abcf3	-0.0468336	0.478842	0.640882	-0.0165977	0.804832	0.856044	0.303294	6.7952e-06	1.97295e-05	0.267791	5.28558e-05	0.000179761	27406	Abcf3	-0.0468335	-0.708166	0.478842	0.640883	-0.0634313	-0.95246	0.340864	0.525338	0.239862	3.61427	0.000301195	0.000532342	0.507654	7.75911	8.55301e-15	3.36274e-14	10.5722	10.542	10.5307	10.7297	10.9067	27406	Abcf3	0.79307	0.776649	0.770584	0.884525	1	27406	Abcf3	20.6838	16.3526	14.6433	14.1393
11307	Abcg1	-0.236423	0.038547	0.0943231	-0.701173	9.56561e-10	3.97096e-09	1.17659	1.01422e-24	9.37528e-24	-0.293005	0.0103867	0.0233017	11307	Abcg1	-0.236423	-2.06899	0.0385472	0.0943236	-0.937596	-8.18576	2.70583e-16	1.50462e-15	0.238998	2.09177	0.0364587	0.051909	-0.0540061	-0.472694	0.636431	0.710554	12.9524	12.7929	12.3476	13.1116	12.9132	11307	Abcg1	0.895501	0.80179	0.588858	1	0.871546	11307	Abcg1	66.91	51.5557	24.0979	41.6825
26357	Abcg2	0.2441	0.0341123	0.0851433	-0.36487	0.00191582	0.00427565	-1.18425	4.87389e-20	3.59495e-19	-0.25809	0.0603638	0.110883	26357	Abcg2	0.2441	2.11874	0.0341122	0.0851429	-0.120769	-1.02904	0.30346	0.477329	-1.30502	-10.2732	9.30387e-25	3.7061e-24	-1.56311	-12.3688	3.85726e-35	2.73708e-34	8.50658	8.6731	8.42372	7.66609	7.50921	26357	Abcg2	0.890992	1	0.841259	0.497578	0.446309	26357	Abcg2	8.66741	8.31609	5.04641	1.5497
27405	Abcg3	-0.347207	0.126966	0.241688	-1.15384	2.76062e-06	8.72373e-06	-2.49934	4.71422e-12	2.21673e-11	-2.12876	0.000548112	0.00159256	27405	Abcg3	-0.347206	-1.52618	0.126966	0.241688	-1.50104	-6.18458	6.22672e-10	2.56062e-09	-4.00039	-11.4595	2.10691e-30	9.70882e-30	-6.12915	-11.0505	2.18094e-28	1.32824e-27	6.47377	6.228	5.43792	4.10991	3.52581	27405	Abcg3	1	0.843368	0.487729	0.194271	0.129592	27405	Abcg3	2.26264	1.32794	0.510811	0.0658112
57742	Abhd1	-0.839571	0.0177511	0.0488273	-0.205241	0.621654	0.705123	0.840408	0.0383476	0.0648463	0.454875	0.188877	0.289582	57742	Abhd1	-0.839571	-2.37077	0.0177512	0.048827	-1.04481	-2.75894	0.0057989	0.0130689	-0.204404	-0.597335	0.550284	0.609182	0.250471	0.798096	0.424815	0.510647	3.7067	3.27453	3.18252	3.63097	3.83814	57742	Abhd1	0.91292	0.676607	0.634803	0.866233	1	57742	Abhd1	0.78693	0.39441	0.279381	0.343584
213012	Abhd10	0.209482	0.01196	0.0347369	-0.136369	0.11206	0.172322	-0.124114	0.166569	0.23686	-0.272876	0.00281277	0.00715478	213012	Abhd10	0.209482	2.51332	0.0119599	0.0347368	0.0731132	0.857122	0.391377	0.588893	-0.0510005	-0.58379	0.559361	0.617572	-0.323876	-3.72248	0.000197278	0.000416803	8.48646	8.62292	8.53247	8.45265	8.2786	213012	Abhd10	0.909749	1	0.939233	0.888674	0.787681	213012	Abhd10	8.36136	7.19128	6.00717	4.31823
68758	Abhd11	-0.110674	0.209735	0.355782	-0.688654	5.68598e-13	2.9014e-12	-0.291811	0.00546166	0.0108185	1.19114	4.97994e-33	1.30398e-31	68758	Abhd11	-0.110673	-1.25429	0.209735	0.355783	-0.799328	-8.50974	1.74319e-17	1.02112e-16	-1.09114	-11.0852	1.47946e-28	6.49708e-28	0.100005	1.14025	0.254181	0.329312	8.66933	8.59361	8.14979	7.97291	8.73752	68758	Abhd11	0.953832	0.905063	0.665387	0.588613	1	68758	Abhd11	12.4356	8.14245	5.31094	3.36899
69812	Abhd11os	-0.921484	0.440118	0.605019	0.284809	0.832111	0.876331	1.35613	0.251362	0.337471	0.967665	0.291864	0.410955	69812	Abhd11os	-0.921484	-0.771994	0.440118	0.605019	-0.636675	-0.539002	0.589886	0.812018	0.71946	0.713108	0.475779	0.537437	1.68713	1.84064	0.0656738	0.0976971	0.606553	0.468855	0.50057	0.758632	1.11991	69812	Abhd11os	0.700588	0.636813	0.650967	0.778472	1	69812	Abhd11os	0.142277	0.0713094	0	0.199671
76192	Abhd12	0.0460252	0.454091	0.61895	-0.2488	5.45233e-05	0.000148893	-0.478849	1.16154e-14	6.39927e-14	-0.393826	2.60893e-10	1.60625e-09	76192	Abhd12	0.0460253	0.748614	0.45409	0.618949	-0.202774	-3.29175	0.000995671	0.00248024	-0.681624	-11.0202	3.05345e-28	1.33292e-27	-1.07545	-17.3775	1.22219e-67	1.60969e-66	13.4574	13.4895	13.3208	13.0098	12.7625	76192	Abhd12	0.97797	1	0.889612	0.717127	0.60415	76192	Abhd12	296.633	236.115	174.966	96.9933
68904	Abhd13	0.153431	0.0349124	0.0867318	0.319592	1.17905e-05	3.4865e-05	0.178793	0.01389	0.0256191	-0.00821414	0.909035	0.940026	68904	Abhd13	0.153431	2.10937	0.0349123	0.0867316	0.473023	6.52833	6.65074e-11	2.88567e-10	0.651815	8.99402	2.38354e-19	8.19303e-19	0.643601	8.97988	2.71057e-19	1.26243e-18	9.56689	9.66378	9.87083	9.99165	9.98517	68904	Abhd13	0.744965	0.796711	0.919664	1	0.995518	68904	Abhd13	6.9683	6.23492	5.31789	5.6524
68644	Abhd14a	0.223428	0.141665	0.263461	-0.32789	0.0401368	0.0693905	-1.39734	4.38214e-12	2.06553e-11	0.214497	0.325929	0.447524	68644	Abhd14a	0.223428	1.46962	0.141664	0.26346	-0.104461	-0.657765	0.510689	0.728132	-1.5018	-7.67165	1.69791e-14	4.9764e-14	-1.28731	-7.17294	7.3403e-13	2.66964e-12	6.33517	6.47944	6.26367	5.41403	5.54128	68644	Abhd14a	0.904835	1	0.861085	0.477838	0.521898	68644	Abhd14a	2.90209	2.38692	2.18552	0.696203
76491	Abhd14b	-0.51124	1.19265e-05	6.57631e-05	-0.461798	0.000210337	0.000534993	-1.28475	3.02772e-18	2.02657e-17	0.419508	0.00638062	0.0150831	76491	Abhd14b	-0.511239	-4.37893	1.19266e-05	6.57635e-05	-0.973037	-8.01686	1.0848e-15	5.86619e-15	-2.25779	-16.0197	9.30988e-58	7.1053e-57	-1.83828	-14.2499	4.48847e-46	4.03251e-45	8.22343	7.86394	7.56125	6.78267	7.01669	76491	Abhd14b	1	0.779439	0.631922	0.368373	0.433247	76491	Abhd14b	12.1297	5.84978	4.57643	1.39883
67477	Abhd15	-0.868194	6.59884e-09	5.4054e-08	-2.09513	3.21081e-30	3.34197e-29	-1.0279	2.58745e-05	7.04957e-05	1.3293	2.21183e-08	1.13162e-07	67477	Abhd15	-0.868194	-5.80083	6.5989e-09	5.40545e-08	-2.96333	-16.5009	3.61258e-61	6.22355e-60	-3.99122	-18.1311	1.81086e-73	1.68926e-72	-2.66192	-15.6256	4.8696e-55	5.21984e-54	7.86756	7.23639	5.88934	5.37624	6.05768	67477	Abhd15	1	0.645652	0.253802	0.177842	0.285214	67477	Abhd15	5.49577	2.11799	0.392207	0.163883
193742	Abhd16a	-0.0610541	0.570748	0.717028	1.02008	2.12385e-21	1.63012e-20	0.322731	0.00247441	0.00517982	-0.931536	3.13349e-18	3.56074e-17	193742	Abhd16a	-0.0610539	-0.566948	0.570749	0.717029	0.959022	8.96125	3.21021e-19	2.01741e-18	1.28175	11.986	4.20587e-33	2.04851e-32	0.350217	3.26166	0.00110762	0.00215907	10.7208	10.6807	11.3443	11.5681	10.9389	193742	Abhd16a	0.555807	0.540588	0.856268	1	0.646511	193742	Abhd16a	34.4171	26.2323	50.6773	45.7516
216169	Abhd17a	-0.106643	0.384421	0.551828	-0.50614	4.13877e-05	0.000114713	-0.898772	8.9608e-13	4.4257e-12	0.663256	1.37692e-07	6.50574e-07	216169	Abhd17a	-0.106643	-0.869778	0.384422	0.55183	-0.612783	-4.97297	6.59363e-07	2.21454e-06	-1.51156	-12.0978	1.08484e-33	5.34537e-33	-0.8483	-6.87766	6.08455e-12	2.10895e-11	10.9554	10.8768	10.5423	9.98065	10.3902	216169	Abhd17a	1	0.946974	0.75103	0.508828	0.675839	216169	Abhd17a	65.174	45.4821	34.7206	14.9335
226016	Abhd17b	0.0280313	0.67022	0.79501	1.3617	1.59294e-99	6.2196e-98	-0.638661	7.95011e-24	7.02222e-23	-0.549222	5.26696e-17	5.5222e-16	226016	Abhd17b	0.0280313	0.425847	0.67022	0.79501	1.38973	21.8846	3.6398e-106	1.09614e-104	0.751066	11.5549	6.9767e-31	3.25128e-30	0.201844	3.07791	0.0020846	0.00391905	9.92488	9.94194	10.8489	10.4101	10.0525	226016	Abhd17b	0.527036	0.533304	1	0.737737	0.575783	226016	Abhd17b	16.5559	13.7433	28.3452	14.6022
70178	Abhd17c	1.59532	1.19375e-59	6.15685e-58	0.345445	0.000369222	0.000911355	-1.30924	1.04817e-40	1.67196e-39	0.250449	0.0110138	0.0245503	70178	Abhd17c	1.59532	16.2884	1.19372e-59	6.15668e-58	1.94076	19.8257	1.78848e-87	4.44788e-86	0.631523	6.38336	1.73243e-10	4.35289e-10	0.881972	8.96287	3.16336e-19	1.46708e-18	10.7367	11.7592	11.994	11.1217	11.2821	70178	Abhd17c	0.41833	0.849812	1	0.546272	0.610501	70178	Abhd17c	29.1801	72.9662	63.8325	26.5128
269423	Abhd18	-0.523447	0.0175336	0.048323	-0.138426	0.565222	0.656241	0.732567	0.00203654	0.00432551	0.332558	0.125249	0.205942	269423	Abhd18	-0.523447	-2.37532	0.0175336	0.0483232	-0.661873	-2.89601	0.00377943	0.00873388	0.070694	0.326021	0.744408	0.784959	0.403252	1.94691	0.0515459	0.0783453	5.68898	5.37859	5.27432	5.74264	5.95433	269423	Abhd18	0.831994	0.670941	0.62416	0.863524	1	269423	Abhd18	1.41306	0.701075	0.497528	0.587582
54608	Abhd2	-0.0913608	0.767173	0.862246	0.795373	0.00984381	0.0194326	0.893788	0.00336108	0.00687367	-0.378075	0.212665	0.318157	54608	Abhd2	-0.0913598	-0.296071	0.767175	0.862249	0.704014	2.29533	0.0217142	0.0447218	1.5978	5.23491	1.65066e-07	3.61459e-07	1.21973	3.99495	6.47068e-05	0.000143124	7.49298	7.39779	7.90586	8.53304	8.26614	54608	Abhd2	0.486304	0.455253	0.647437	1	0.831103	54608	Abhd2	3.73704	2.86171	1.81513	4.16125
106861	Abhd3	-0.156908	0.419503	0.585582	-0.502045	0.0215043	0.0395059	-0.630448	0.0155038	0.0283391	0.22334	0.403316	0.528667	106861	Abhd3	-0.156908	-0.807281	0.419504	0.585584	-0.658953	-3.11701	0.00182696	0.00441092	-1.2894	-5.3566	8.48018e-08	1.88314e-07	-1.06606	-4.85181	1.22341e-06	3.11294e-06	5.43779	5.32758	5.02512	4.65753	4.78412	106861	Abhd3	1	0.926453	0.751232	0.582264	0.635664	106861	Abhd3	1.26292	0.88806	0.511033	0.335078
105501	Abhd4	-0.153059	0.0206316	0.0554739	-0.182469	0.00680821	0.0138314	-0.547579	4.89131e-15	2.74487e-14	0.099369	0.159233	0.251327	105501	Abhd4	-0.153059	-2.31466	0.0206316	0.055474	-0.335528	-5.02091	5.1426e-07	1.74313e-06	-0.883108	-12.8582	7.73961e-38	4.13835e-37	-0.783739	-11.6087	3.72352e-31	2.4077e-30	10.7307	10.6264	10.5044	10.1529	10.2149	105501	Abhd4	1	0.930257	0.854834	0.669994	0.699434	105501	Abhd4	33.0202	23.3591	15.7605	9.70876
67469	Abhd5	0.145074	0.0121729	0.0352819	-0.56016	2.63766e-20	1.93371e-19	0.981543	6.34972e-59	1.72133e-57	-0.157773	0.00637831	0.01508	67469	Abhd5	0.145074	2.50709	0.0121729	0.0352818	-0.415087	-6.88512	5.77385e-12	2.65803e-11	0.566456	9.79435	1.19055e-22	4.50571e-22	0.408683	7.11108	1.15139e-12	4.1463e-12	10.1564	10.2517	9.89251	10.5316	10.4263	67469	Abhd5	0.770995	0.823619	0.642111	1	0.929579	67469	Abhd5	16.44	14.3729	7.48315	14.0493
66082	Abhd6	0.130222	0.592391	0.734579	-0.221466	0.387028	0.486685	-0.0394638	0.884083	0.917095	-0.351764	0.203951	0.307735	66082	Abhd6	0.130222	0.535376	0.59239	0.734577	-0.091244	-0.360954	0.718134	0.929686	-0.130708	-0.505378	0.613293	0.667669	-0.482472	-1.85954	0.0629506	0.0940202	5.02374	5.08971	4.9662	4.94821	4.7288	66082	Abhd6	0.955306	1	0.917957	0.906578	0.778675	66082	Abhd6	0.916551	0.441708	0.460793	0.412271
64296	Abhd8	-0.366103	8.04064e-06	4.53987e-05	-1.01125	1.1423e-26	1.06217e-25	-1.26815	8.85699e-24	7.79256e-23	1.53671	9.89669e-36	2.87661e-34	64296	Abhd8	-0.366103	-4.4641	8.04068e-06	4.53989e-05	-1.37735	-14.9725	1.10999e-50	1.59168e-49	-2.6455	-22.6114	3.34976e-113	4.94405e-112	-1.10879	-12.6171	1.69931e-36	1.23908e-35	8.58248	8.32699	7.6603	6.91896	7.83369	64296	Abhd8	1	0.837704	0.527709	0.315668	0.595102	64296	Abhd8	11.1456	6.95132	2.81072	1.20708
11308	Abi1	0.528638	1.52042e-06	9.46739e-06	1.10341	8.95606e-24	7.57813e-23	-0.214214	0.0508149	0.0834474	-0.50849	3.60803e-06	1.43665e-05	11308	Abi1	0.528638	4.80853	1.5204e-06	9.4673e-06	1.63205	14.8628	5.74522e-50	8.12684e-49	1.41783	12.9063	4.14805e-38	2.22758e-37	0.909341	8.27546	1.27956e-16	5.39436e-16	12.7304	13.0536	13.7856	13.6417	13.2999	11308	Abi1	0.481248	0.602081	1	0.905064	0.714144	11308	Abi1	77.5844	91.0497	134.477	112.239
329165	Abi2	-0.0479781	0.713993	0.824994	-0.0665371	0.614651	0.699606	-0.589478	1.28661e-05	3.62756e-05	-0.0357984	0.793034	0.862946	329165	Abi2	-0.0479778	-0.366497	0.713994	0.824995	-0.114515	-0.870673	0.383933	0.579873	-0.703993	-5.25756	1.45977e-07	3.20224e-07	-0.739791	-5.56766	2.58181e-08	7.35424e-08	9.3073	9.26929	9.2264	8.84634	8.82767	329165	Abi2	1	0.974003	0.945468	0.726504	0.717162	329165	Abi2	6.32911	4.89401	2.85367	1.74359
66610	Abi3	-0.28546	0.0299631	0.0761575	-1.48671	6.12848e-26	5.57315e-25	1.59136	3.76535e-29	4.13583e-28	2.32916	4.4962e-71	5.33897e-69	66610	Abi3	-0.28546	-2.17058	0.0299632	0.0761574	-1.77217	-12.6653	9.20904e-37	9.92197e-36	-0.180816	-1.36553	0.172085	0.217259	2.14834	16.7304	7.87262e-63	9.6143e-62	9.21061	9.02385	8.15484	9.08755	10.72	66610	Abi3	0.351249	0.3086	0.168965	0.322531	1	66610	Abi3	6.13624	3.70984	1.36915	3.91176
11350	Abl1	-0.573057	1.40004e-05	7.64557e-05	-0.973062	5.05879e-13	2.58472e-12	0.869268	1.34501e-10	5.75395e-10	0.761075	9.99185e-09	5.30704e-08	11350	Abl1	-0.573056	-4.34385	1.40005e-05	7.64564e-05	-1.54612	-11.5406	8.23717e-31	7.64616e-30	-0.676851	-5.10481	3.3113e-07	7.14204e-07	0.084224	0.641021	0.521509	0.606491	10.5628	10.1764	9.56522	10.1078	10.6163	11350	Abl1	0.963547	0.737158	0.482599	0.702961	1	11350	Abl1	12.8424	7.02267	2.09163	4.51501
11352	Abl2	0.188772	0.0902517	0.1842	1.1019	2.43215e-23	2.01771e-22	-0.497297	6.6998e-06	1.94705e-05	-0.397673	0.000347584	0.00104459	11352	Abl2	0.188772	1.69407	0.0902513	0.1842	1.29067	11.6779	1.65281e-31	1.57096e-30	0.793375	7.13684	9.55001e-13	2.64514e-12	0.395702	3.55653	0.000375788	0.000771845	10.1147	10.2313	10.9619	10.6294	10.3654	11352	Abl2	0.555889	0.602675	1	0.794178	0.661392	11352	Abl2	5.32841	4.92523	6.15574	4.33298
231148	Ablim2	0.0909695	0.708215	0.821229	-0.126647	0.620098	0.703815	-1.72587	6.51786e-07	2.07304e-06	0.938789	0.0094454	0.0213904	231148	Ablim2	0.0909699	0.374257	0.708213	0.821227	-0.0356771	-0.142031	0.887056	0.974041	-1.76155	-5.21364	1.85169e-07	4.04543e-07	-0.82276	-3.03215	0.0024282	0.00452467	4.76654	4.82581	4.73654	3.80447	4.27205	231148	Ablim2	0.959755	1	0.940004	0.49266	0.681244	231148	Ablim2	0.444734	0.360436	0.219888	0.0796772
109934	Abr	0.114464	0.26881	0.426888	1.27538	5.59555e-35	6.67384e-34	-0.843841	3.2255e-16	1.93382e-15	0.670207	8.91126e-11	5.69236e-10	109934	Abr	0.114464	1.10581	0.268809	0.426887	1.38985	13.4532	2.94781e-41	3.52424e-40	0.546005	5.27529	1.32547e-07	2.91081e-07	1.21621	11.7721	5.43724e-32	3.5993e-31	12.6897	12.759	13.598	13.0348	13.4831	109934	Abr	0.532799	0.559026	1	0.676802	0.923425	109934	Abr	50.2789	45.0093	67.4967	37.8793
73112	Abracl	1.29353	2.42341e-27	5.65881e-26	1.07361	1.62695e-19	1.14823e-18	0.159306	0.179321	0.252501	-0.613437	2.363e-07	1.08731e-06	73112	Abracl	1.29354	10.8322	2.42335e-27	5.65868e-26	2.36715	19.8541	1.01469e-87	2.53622e-86	2.52646	21.1893	1.19923e-99	1.52133e-98	1.91302	16.0371	7.04126e-58	7.95527e-57	11.5761	12.3396	13.0533	13.1673	12.745	73112	Abracl	0.331898	0.563425	0.924045	1	0.746269	73112	Abracl	105.522	199.094	435.56	349.342
70681	Abraxas1	-0.871905	8.03155e-17	1.1956e-15	0.152579	0.1798	0.257777	-0.336495	0.00532332	0.0105592	0.458114	0.000109255	0.000353819	70681	Abraxas1	-0.871905	-8.33077	8.03159e-17	1.19561e-15	-0.719326	-6.82164	9.00048e-12	4.10346e-11	-1.05582	-9.40779	5.067e-21	1.83386e-20	-0.597708	-5.8161	6.02379e-09	1.78062e-08	7.88032	7.30728	7.40156	7.19162	7.48224	70681	Abraxas1	1	0.672198	0.717595	0.620414	0.758867	70681	Abraxas1	5.43715	2.46829	2.17748	1.38494
109359	Abraxas2	-0.002175	0.974956	0.989687	0.234955	0.00074844	0.00177455	0.0882843	0.206057	0.285059	0.123917	0.0740346	0.131898	109359	Abraxas2	-0.00217493	-0.0313916	0.974957	0.986746	0.23278	3.3607	0.000777464	0.0019638	0.321064	4.62574	3.73256e-06	7.56251e-06	0.444982	6.46677	1.00123e-10	3.24471e-10	10.7586	10.7571	10.9094	10.9679	11.0492	109359	Abraxas2	0.817596	0.816741	0.907657	0.945226	1	109359	Abraxas2	28.2834	22.9816	20.0454	18.967
30946	Abt1	-0.0178321	0.889992	0.937398	0.416237	0.00127374	0.00292077	-0.358035	0.00590526	0.0116224	-0.020527	0.875057	0.916156	30946	Abt1	-0.0178319	-0.138312	0.889994	0.934505	0.398405	3.09922	0.0019403	0.00466867	0.0403698	0.311046	0.755765	0.794468	0.0198428	0.15376	0.877799	0.90796	9.31173	9.29552	9.56898	9.33912	9.32447	30946	Abt1	0.836682	0.827331	1	0.852714	0.844098	30946	Abt1	5.58763	4.48884	6.25269	3.79387
80283	Abtb1	-0.566506	9.80748e-08	7.11995e-07	-1.50516	6.67664e-41	9.3652e-40	-0.816113	4.44094e-11	1.96463e-10	1.28048	6.62896e-26	1.21172e-24	80283	Abtb1	-0.566505	-5.33025	9.80757e-08	7.12002e-07	-2.07166	-18.597	3.39559e-77	7.3649e-76	-2.88778	-24.3988	1.75924e-131	3.13483e-130	-1.6073	-14.7539	2.90455e-49	2.78762e-48	10.1078	9.70155	8.71935	8.24659	9.00887	80283	Abtb1	1	0.754598	0.381983	0.275251	0.466875	80283	Abtb1	37.6693	17.7894	6.5033	3.00923
99382	Abtb2	0.5286	0.0441318	0.104727	6.23638	2.60494e-211	3.65063e-209	0.163522	0.191468	0.26716	-1.63725	1.01186e-37	3.24259e-36	99382	Abtb2	0.5286	2.01284	0.0441317	0.104727	6.76498	32.1567	7.1272e-227	6.34289e-225	6.92851	32.9319	7.68242e-238	2.97541e-236	5.29125	24.9841	9.11095e-138	2.89334e-136	6.04319	6.20414	9.80553	9.93016	8.73176	99382	Abtb2	0.0675938	0.0755715	0.917244	1	0.435759	99382	Abtb2	0.156074	0.203383	9.20314	8.17726
113868	Acaa1a	0.114738	0.293804	0.455699	0.46952	1.73402e-05	5.02906e-05	0.731689	1.85203e-11	8.37497e-11	0.0225952	0.835191	0.890785	113868	Acaa1a	0.114739	1.04982	0.293803	0.455698	0.584259	5.35209	8.69455e-08	3.10625e-07	1.31595	12.079	1.36394e-33	6.70622e-33	1.33854	12.2979	9.3003e-35	6.54083e-34	11.5135	11.5824	11.8791	12.3727	12.3865	113868	Acaa1a	0.545993	0.572726	0.70346	0.990493	1	113868	Acaa1a	63.8546	52.0218	74.6592	89.1403
52538	Acaa2	-0.0424645	0.693067	0.811031	-0.0297215	0.783915	0.839935	0.0120244	0.912195	0.936478	-0.60136	4.43887e-08	2.2019e-07	52538	Acaa2	-0.0424643	-0.394695	0.693068	0.811033	-0.0721858	-0.668657	0.503714	0.720432	-0.0601614	-0.555753	0.578379	0.635687	-0.661521	-6.07962	1.20467e-09	3.68615e-09	10.1789	10.1511	10.1276	10.1354	9.75248	52538	Acaa2	1	0.980918	0.965049	0.970273	0.744098	52538	Acaa2	35.8538	26.5509	24.6131	17.7264
107476	Acaca	0.253103	0.000966761	0.00379714	-0.0314071	0.691292	0.765738	0.177583	0.0283659	0.049175	0.252048	0.00110032	0.00302761	107476	Acaca	0.253103	3.30003	0.000966757	0.00379713	0.221696	2.81985	0.00480464	0.0109551	0.399279	5.075	3.87495e-07	8.32871e-07	0.651327	8.71566	2.89064e-18	1.29532e-17	8.15343	8.31291	8.29404	8.40929	8.57407	107476	Acaca	0.747095	0.834419	0.823575	0.892062	1	107476	Acaca	1.47286	1.48824	1.14012	0.998503
71985	Acad10	-0.391085	0.00441202	0.0145905	-0.250982	0.0986175	0.154327	-0.170613	0.301781	0.393353	-0.0482643	0.771908	0.848518	71985	Acad10	-0.391085	-2.84709	0.00441203	0.0145906	-0.642067	-4.43283	9.30025e-06	2.84791e-05	-0.81268	-5.34988	8.80111e-08	1.95306e-07	-0.860945	-5.88396	4.00558e-09	1.19456e-08	6.68328	6.42419	6.2651	6.16343	6.1302	71985	Acad10	1	0.835617	0.748369	0.697444	0.681565	71985	Acad10	1.46363	0.915737	0.56116	0.468712
102632	Acad11	-0.0413118	0.783104	0.872026	-0.507944	0.00102097	0.00237621	-0.231557	0.149589	0.215924	0.615696	9.95009e-05	0.000324703	102632	Acad11	-0.0413115	-0.275274	0.783106	0.872027	-0.549255	-3.57836	0.00034575	0.000908121	-0.780812	-4.99549	5.8688e-07	1.24791e-06	-0.165116	-1.09431	0.27382	0.351681	8.19789	8.15591	7.83727	7.69123	8.08226	102632	Acad11	1	0.971318	0.778827	0.703847	0.922977	102632	Acad11	4.91892	3.91903	1.78989	1.69971
338350	Acad12	-0.486146	0.000274953	0.00120714	-1.13238	6.39236e-12	3.07397e-11	-0.920116	2.78198e-05	7.55467e-05	1.56724	4.60956e-14	3.86054e-13	338350	Acad12	-0.486146	-3.63782	0.000274954	0.0012075	-1.61853	-10.2048	1.88619e-24	1.43148e-23	-2.53865	-12.8706	6.592e-38	3.53059e-37	-0.971409	-6.84641	7.57266e-12	2.60845e-11	6.81128	6.4787	5.76599	5.25748	6.15805	338350	Acad12	1	0.794114	0.484545	0.34061	0.635853	338350	Acad12	2.6808	1.4412	0.638046	0.294252
66948	Acad8	-0.386964	1.17214e-09	1.03188e-08	-0.436039	2.26104e-10	9.84446e-10	0.0496712	0.49274	0.58649	0.170606	0.0158301	0.0340953	66948	Acad8	-0.386964	-6.08401	1.17214e-09	1.03189e-08	-0.823003	-12.333	6.01914e-35	6.17662e-34	-0.773332	-11.4488	2.38337e-30	1.09514e-29	-0.602725	-9.28919	1.55462e-20	7.51721e-20	9.6431	9.3831	9.10001	9.13268	9.2419	66948	Acad8	1	0.835093	0.686303	0.702021	0.757231	66948	Acad8	14.7864	9.32124	5.84218	4.89014
229211	Acad9	-0.28137	2.33382e-05	0.000123487	0.293175	2.02816e-05	5.83148e-05	0.199596	0.00350735	0.00715603	-0.158545	0.0188707	0.0399312	229211	Acad9	-0.28137	-4.2303	2.33382e-05	0.000123487	0.0118054	0.178467	0.858357	0.974041	0.211401	3.1993	0.00137764	0.00231353	0.0528563	0.809731	0.418095	0.504184	9.13902	8.95962	9.148	9.27931	9.17456	229211	Acad9	0.907341	0.801246	0.913004	1	0.929967	229211	Acad9	7.15384	4.48303	4.43592	4.33735
11363	Acadl	0.227031	2.84224e-06	1.70936e-05	0.388745	9.47592e-16	5.64884e-15	0.403921	3.07872e-17	1.94618e-16	-0.497152	2.33022e-25	4.10697e-24	11363	Acadl	0.227031	4.6819	2.84223e-06	1.70935e-05	0.615776	12.7658	2.54618e-37	2.77189e-36	1.0197	21.2704	2.1334e-100	2.71928e-99	0.522545	10.8467	2.06776e-27	1.23152e-26	11.0068	11.1471	11.3986	11.6655	11.3377	11363	Acadl	0.633435	0.698108	0.831061	1	0.79675	11363	Acadl	43.4651	41.0443	47.0911	47.6136
11364	Acadm	-0.0125337	0.868964	0.924361	-0.550075	1.21495e-12	6.08679e-12	-0.997887	3.48088e-34	4.5797e-33	0.376353	5.58432e-06	2.16833e-05	11364	Acadm	-0.0125336	-0.164973	0.868965	0.92161	-0.562609	-7.29657	2.95203e-13	1.443e-12	-1.5605	-19.3912	9.15131e-84	9.76038e-83	-1.18414	-15.146	8.04883e-52	8.10302e-51	10.7501	10.7412	10.3699	9.73979	9.96914	11364	Acadm	1	0.993874	0.768358	0.496445	0.581983	11364	Acadm	53.7105	39.9255	22.2507	9.74006
11409	Acads	-0.147061	0.136135	0.255429	-0.50172	6.54995e-07	2.19863e-06	-0.295498	0.00444212	0.00892061	0.463567	7.02066e-06	2.69395e-05	11409	Acads	-0.147061	-1.49034	0.136136	0.25543	-0.648781	-6.47378	9.55819e-11	4.10766e-10	-0.944279	-9.28063	1.68484e-20	6.00719e-20	-0.480712	-4.83134	1.35614e-06	3.43844e-06	10.0109	9.91113	9.58729	9.40773	9.69386	11409	Acads	1	0.933159	0.74554	0.658289	0.802693	11409	Acads	26.6043	18.3999	12.8424	8.46003
66885	Acadsb	0.0782722	0.338803	0.505304	0.0692963	0.401534	0.501046	0.556095	1.3305e-11	6.06549e-11	0.07424	0.358575	0.482422	66885	Acadsb	0.0782723	0.956535	0.338802	0.505303	0.147569	1.79628	0.0724502	0.134642	0.703664	8.64258	5.49589e-18	1.81536e-17	0.777904	9.62539	6.24689e-22	3.16969e-21	10.0436	10.0912	10.1341	10.4997	10.5479	66885	Acadsb	0.705022	0.728675	0.750672	0.967163	1	66885	Acadsb	13.7156	12.1618	8.86717	12.554
11370	Acadvl	0.0726066	0.253077	0.408325	-0.134249	0.0365888	0.0639387	-0.309253	2.32644e-06	7.04801e-06	0.118139	0.0715541	0.128135	11370	Acadvl	0.0726067	1.14291	0.253077	0.408324	-0.0616425	-0.963558	0.335268	0.518081	-0.370896	-5.7238	1.04165e-08	2.4156e-08	-0.252756	-3.94578	7.954e-05	0.000174667	11.1182	11.1652	11.0772	10.8778	10.9527	11370	Acadvl	0.967954	1	0.940866	0.819395	0.863024	11370	Acadvl	50.832	39.653	33.259	21.4969
216859	Acap1	-0.109086	0.401795	0.568773	-0.831578	5.37426e-09	2.12855e-08	-2.90199	2.35105e-31	2.79349e-30	-0.385598	0.229906	0.339769	216859	Acap1	-0.109086	-0.838417	0.401796	0.568775	-0.940664	-6.71041	1.94083e-11	8.6693e-11	-3.84265	-15.8592	1.21378e-56	9.08245e-56	-4.22825	-17.1553	5.7324e-66	7.36128e-65	7.17273	7.09446	6.51832	4.88801	4.72291	216859	Acap1	1	0.947192	0.635334	0.205226	0.183034	216859	Acap1	3.36775	2.32718	1.12395	0.120672
78618	Acap2	0.059565	0.693331	0.811135	0.0990305	0.51255	0.608363	0.357614	0.0180161	0.0325073	-0.10971	0.467558	0.592248	78618	Acap2	0.0595653	0.394341	0.693329	0.811134	0.158596	1.04955	0.293924	0.464566	0.51621	3.41811	0.000630566	0.00108652	0.406501	2.69322	0.00707658	0.0124091	11.2582	11.2876	11.3539	11.5984	11.5181	78618	Acap2	0.789914	0.806185	0.844061	1	0.945842	78618	Acap2	20.6524	16.9735	10.9743	13.9203
140500	Acap3	-0.672473	6.3319e-12	6.82082e-11	-0.914249	3.82494e-18	2.54074e-17	-0.0428537	0.701303	0.772738	0.718153	2.81625e-11	1.90545e-10	140500	Acap3	-0.672473	-6.87197	6.33195e-12	6.82087e-11	-1.58672	-15.3818	2.16797e-53	3.2844e-52	-1.62958	-15.5555	1.46017e-54	1.0567e-53	-0.911423	-9.20635	3.37398e-20	1.6139e-19	9.45555	8.99507	8.40689	8.38335	8.83187	140500	Acap3	1	0.726747	0.483416	0.475592	0.649013	140500	Acap3	9.55	4.81127	1.81263	1.64348
110446	Acat1	0.0383184	0.572309	0.718635	-0.212093	0.00219597	0.00485943	-0.40674	1.54775e-08	5.68002e-08	-0.0732037	0.314762	0.43551	110446	Acat1	0.0383184	0.564655	0.572308	0.718634	-0.173775	-2.52613	0.0115326	0.0248399	-0.580514	-8.2264	1.92922e-16	6.04217e-16	-0.653718	-9.37332	7.02838e-21	3.44508e-20	10.2643	10.2897	10.1472	9.88294	9.83713	110446	Acat1	0.982595	1	0.905995	0.754341	0.730765	110446	Acat1	18.507	14.1223	10.4862	6.60045
110460	Acat2	0.2249	0.0765972	0.162404	0.303629	0.016873	0.0317209	1.25717	5.32577e-24	4.75772e-23	0.618911	3.07209e-07	1.39226e-06	110460	Acat2	0.2249	1.77078	0.0765969	0.162404	0.52853	4.16966	3.0505e-05	8.89513e-05	1.7857	14.3588	9.39027e-47	5.95854e-46	2.40461	19.5021	1.05281e-84	1.79842e-83	8.79308	8.93175	9.11212	9.94689	10.3806	110460	Acat2	0.33275	0.366319	0.415105	0.740371	1	110460	Acat2	7.14469	7.4023	8.84226	16.4309
224530	Acat3	0.83457	0.0538162	0.122877	2.40422	1.01286e-12	5.10202e-12	0.76005	0.00220272	0.0046506	-0.775135	0.00162581	0.00432439	224530	Acat3	0.83457	1.92831	0.053816	0.122876	3.23879	8.66475	4.52494e-18	2.71715e-17	3.99884	10.8723	1.56154e-27	6.69653e-27	3.2237	8.65834	4.78692e-18	2.12479e-17	3.42616	3.7478	5.03867	5.58445	5.06402	224530	Acat3	0.224022	0.279971	0.685023	1	0.697164	224530	Acat3	0.14292	0.0895396	0.934084	0.936011
170760	Acbd3	0.298338	0.000451355	0.00190255	0.704935	7.76152e-17	4.86327e-16	0.523925	4.0624e-10	1.68241e-09	-0.458014	4.34452e-08	2.15823e-07	170760	Acbd3	0.298338	3.50808	0.000451353	0.00190254	1.00327	11.8669	1.75771e-32	1.70998e-31	1.5272	18.1212	2.16682e-73	2.01898e-72	1.06918	12.6718	8.47966e-37	6.22447e-36	10.6636	10.846	11.3013	11.6604	11.3477	170760	Acbd3	0.501131	0.568651	0.779639	1	0.805152	170760	Acbd3	20.0442	19.8869	21.7197	30.6132
67131	Acbd4	-0.535883	1.00848e-08	8.10066e-08	-0.456381	1.76807e-05	5.12212e-05	0.360103	0.00117807	0.00260071	0.93441	5.23962e-21	7.07141e-20	67131	Acbd4	-0.535883	-5.7293	1.00849e-08	8.1007e-08	-0.992263	-9.8182	9.40082e-23	6.71706e-22	-0.632161	-6.39656	1.58915e-10	4.0035e-10	0.302249	3.42985	0.000603909	0.00121106	8.04739	7.69432	7.41283	7.6357	8.25215	67131	Acbd4	0.867687	0.679324	0.55891	0.652275	1	67131	Acbd4	6.61355	3.72691	2.18983	2.51673
74159	Acbd5	0.0479548	0.726043	0.834385	-0.103736	0.449785	0.547995	-0.267379	0.0525303	0.0859212	-0.145755	0.291403	0.410418	74159	Acbd5	0.0479551	0.350397	0.726041	0.834383	-0.0557809	-0.406881	0.684096	0.902517	-0.32316	-2.34999	0.018774	0.0278602	-0.468915	-3.41443	0.000639165	0.00127864	10.7917	10.8168	10.7466	10.5791	10.4816	74159	Acbd5	0.982764	1	0.952487	0.848117	0.792712	74159	Acbd5	25.5706	20.6629	12.6551	11.023
72482	Acbd6	0.172946	0.144767	0.267982	-0.282884	0.0178638	0.0334314	-0.258747	0.0324045	0.055593	-0.0205841	0.865125	0.909414	72482	Acbd6	0.172946	1.45827	0.144767	0.267981	-0.109938	-0.921681	0.356695	0.545627	-0.368685	-3.06948	0.00214431	0.00353782	-0.389269	-3.25678	0.00112682	0.00219468	10.0773	10.1852	10.0032	9.83688	9.82147	72482	Acbd6	0.927937	1	0.881496	0.785515	0.777168	72482	Acbd6	25.0743	20.2692	17.9471	12.0125
329470	Accs	-0.550335	3.67229e-07	2.48135e-06	-0.843432	4.39023e-12	2.13539e-11	-1.11746	2.16109e-13	1.10924e-12	0.196127	0.225714	0.334542	329470	Accs	-0.550335	-5.0852	3.67231e-07	2.48136e-06	-1.39377	-11.8121	3.3803e-32	3.25657e-31	-2.51123	-17.7252	2.68133e-70	2.41575e-69	-2.3151	-17.7785	1.03777e-70	1.43096e-69	8.03681	7.65032	7.08628	6.42732	6.53059	329470	Accs	1	0.76499	0.517443	0.327715	0.352033	329470	Accs	8.15351	4.08655	2.27532	0.699549
497652	Acd	-0.0400029	0.591087	0.733555	-0.561694	6.66641e-13	3.38957e-12	-0.294774	0.000406071	0.00095701	0.43323	1.40183e-07	6.61121e-07	497652	Acd	-0.0400028	-0.537261	0.591088	0.733556	-0.601696	-7.78317	7.0731e-15	3.68239e-14	-0.89647	-11.2203	3.24238e-29	1.44844e-28	-0.46324	-6.08334	1.17704e-09	3.60429e-09	9.56765	9.54054	9.17212	8.98576	9.26056	497652	Acd	1	0.981383	0.760213	0.668089	0.808269	497652	Acd	26.5334	20.9925	12.1809	8.29044
66190	Acer3	0.371553	9.1914e-06	5.14597e-05	-0.397187	2.41655e-06	7.67353e-06	0.780127	2.06455e-20	1.55049e-19	-1.3803	1.42336e-59	1.1124e-57	66190	Acer3	0.371554	4.43537	9.19133e-06	5.14594e-05	-0.0256336	-0.304188	0.760985	0.964684	0.754494	9.00468	2.16288e-19	7.44568e-19	-0.625804	-7.37891	1.59585e-13	5.97716e-13	11.2642	11.5096	11.2457	11.7665	10.8693	66190	Acer3	0.706021	0.836933	0.697031	1	0.536959	66190	Acer3	28.1451	28.6432	19.5539	23.8641
56215	Acin1	0.0841819	0.181867	0.31911	0.0684821	0.278974	0.373906	0.458817	3.87021e-13	1.95076e-12	-0.22153	0.000438271	0.00129279	56215	Acin1	0.084182	1.33503	0.181866	0.319109	0.152664	2.41782	0.0156138	0.032937	0.611482	9.70631	2.8341e-22	1.06406e-21	0.389952	6.19449	5.84747e-10	1.82283e-09	12.3329	12.3857	12.4295	12.7328	12.5861	56215	Acin1	0.757873	0.786129	0.810357	1	0.903268	56215	Acin1	50.8725	41.4117	38.836	40.1861
104112	Acly	0.0149074	0.877307	0.929942	0.164365	0.0892561	0.141269	0.377157	9.54697e-05	0.00024338	0.320588	0.000876193	0.00245906	104112	Acly	0.0149075	0.154386	0.877306	0.927118	0.179273	1.85603	0.0634486	0.119503	0.556429	5.76618	8.10868e-09	1.88639e-08	0.877017	9.10985	8.24953e-20	3.89956e-19	11.9178	11.9263	12.0283	12.2806	12.4952	104112	Acly	0.67016	0.67415	0.723522	0.861796	1	104112	Acly	40.5025	32.5137	25.5558	32.3765
11428	Aco1	-0.0663057	0.529692	0.682866	-0.0374031	0.724722	0.793806	0.00808643	0.939637	0.956207	0.318147	0.00275131	0.00701124	11428	Aco1	-0.0663056	-0.628475	0.529693	0.682868	-0.103709	-0.979999	0.327087	0.507892	-0.0956222	-0.901421	0.367364	0.429773	0.222524	2.11347	0.0345602	0.0544607	10.5141	10.4693	10.4441	10.4494	10.6581	11428	Aco1	0.905007	0.877305	0.862105	0.86527	1	11428	Aco1	16.9734	12.9526	9.13031	8.96879
11429	Aco2	0.088681	0.0933712	0.189263	0.182678	0.000581032	0.00139875	0.206844	9.86176e-05	0.00025112	-0.0958894	0.0698789	0.125679	11429	Aco2	0.0886811	1.67788	0.0933711	0.189263	0.271359	5.13035	2.89204e-07	9.95583e-07	0.478203	9.04433	1.5058e-19	5.20599e-19	0.382313	7.25839	3.91715e-13	1.44446e-12	11.7007	11.7578	11.8759	12.0132	11.9497	11429	Aco2	0.80524	0.837735	0.909232	1	0.956956	11429	Aco2	55.7954	45.1738	41.445	41.7064
16365	Acod1	7.55302	0	0	2.22128	6.32928e-98	2.42896e-96	0.835104	2.79322e-15	1.58734e-14	-0.784846	1.13179e-13	9.21676e-13	16365	Acod1	7.55302	65.6497	0	0	9.7743	84.9899	0	0	10.6094	92.2557	0	0	9.82456	85.4282	0	0	13.3422	15.455	16.9325	17.5422	16.9673	16365	Acod1	0.0544102	0.235334	0.655308	1	0.671336	16365	Acod1	2.84499	535.977	1864.13	2877.06
26897	Acot1	-0.15068	0.444566	0.609438	-1.04157	4.13566e-06	1.28567e-05	-3.54	1.5432e-11	7.01434e-11	-3.92627	0.000570359	0.00165219	26897	Acot1	-0.150679	-0.764504	0.444567	0.60944	-1.19225	-5.37956	7.46661e-08	2.67719e-07	-4.73225	-9.22332	2.8803e-20	1.02106e-19	-8.65852	-8.36191	6.17131e-17	2.64577e-16	5.56547	5.44968	4.73047	3.17278	2.72177	26897	Acot1	1	0.922878	0.560583	0.190427	0.139303	26897	Acot1	1.87086	1.23499	0.773188	0.0213461
64833	Acot10	0.715716	0.277291	0.436227	1.42228	0.0114266	0.0222631	0.653334	0.167115	0.237529	-0.506475	0.272559	0.389392	64833	Acot10	0.715717	1.08643	0.27729	0.436226	2.138	3.57339	0.00035239	0.00092446	2.79134	4.77557	1.792e-06	3.7031e-06	2.28486	3.87648	0.000105977	0.000229959	2.15918	2.35889	2.99799	3.33725	3.07633	64833	Acot10	0.441942	0.507557	0.790447	1	0.834554	64833	Acot10	0.0694259	0.0231976	0.224073	0.173213
329910	Acot11	-0.381164	0.0132845	0.0380929	-0.0555693	0.724251	0.793512	-0.287736	0.0747784	0.117501	0.448404	0.00511961	0.0123344	329910	Acot11	-0.381164	-2.47605	0.0132846	0.0380931	-0.436733	-2.81369	0.00489769	0.0111519	-0.724469	-4.58534	4.53239e-06	9.12211e-06	-0.276064	-1.79425	0.0727725	0.107383	8.27256	8.02528	7.98566	7.80708	8.08882	329910	Acot11	1	0.842483	0.819659	0.724227	0.880418	329910	Acot11	3.26323	1.86829	1.25778	0.95115
66834	Acot13	0.162368	0.263647	0.420769	-0.63086	1.79927e-05	5.20865e-05	-1.52924	1.73008e-22	1.433e-21	0.244908	0.127908	0.209753	66834	Acot13	0.162368	1.11781	0.263646	0.420768	-0.468492	-3.18927	0.00142634	0.00348523	-1.99773	-12.888	5.25893e-38	2.82227e-37	-1.75282	-11.5843	4.95197e-31	3.192e-30	9.26357	9.37051	8.93979	7.99369	8.13337	66834	Acot13	0.928562	1	0.741891	0.385067	0.424214	66834	Acot13	40.2876	34.5632	25.4535	7.17962
171210	Acot2	-0.163622	0.285104	0.446045	-2.39245	3.3894e-37	4.31818e-36	-2.06399	2.99162e-11	1.33437e-10	0.745729	0.0267086	0.0544427	171210	Acot2	-0.163622	-1.06892	0.285105	0.446046	-2.55608	-13.7376	6.04241e-43	7.4855e-42	-4.62007	-15.8825	8.37177e-57	6.29077e-56	-3.87434	-17.0734	2.3434e-65	2.98597e-64	7.32502	7.20731	5.60233	4.59879	4.88596	171210	Acot2	1	0.921647	0.302983	0.15112	0.184404	171210	Acot2	4.624	3.46823	0.547909	0.075633
70025	Acot7	0.222111	0.0578128	0.129773	0.480213	4.04739e-05	0.000112299	0.0340628	0.770805	0.827818	-0.266054	0.0229458	0.0474977	70025	Acot7	0.222111	1.89712	0.0578126	0.129773	0.702324	6.00673	1.893e-09	7.54993e-09	0.736387	6.29315	3.11091e-10	7.73063e-10	0.470333	4.02067	5.80336e-05	0.00012899	11.0008	11.1351	11.4574	11.4793	11.3011	70025	Acot7	0.717705	0.787747	0.984921	1	0.883809	70025	Acot7	42.0711	35.9422	51.2897	43.4231
170789	Acot8	-0.169388	0.132205	0.249522	-0.00470205	0.967279	0.975733	0.219491	0.0569537	0.0923879	0.386824	0.00063072	0.00181196	170789	Acot8	-0.169388	-1.50546	0.132206	0.249523	-0.17409	-1.53639	0.124443	0.219177	0.0454015	0.40106	0.688376	0.736488	0.432225	3.88886	0.000100717	0.000219124	9.04702	8.93384	8.93245	9.07632	9.3294	170789	Acot8	0.822236	0.760196	0.759463	0.839103	1	170789	Acot8	20.4577	12.3909	14.2129	12.9818
56360	Acot9	0.559748	6.71099e-15	8.82394e-14	1.02294	4.59896e-48	7.66298e-47	0.330809	1.57651e-06	4.84529e-06	-0.844266	4.57761e-34	1.24326e-32	56360	Acot9	0.559748	7.78981	6.71092e-15	8.82386e-14	1.58269	22.3829	5.77865e-111	1.81748e-109	1.9135	27.1184	5.98126e-162	1.38926e-160	1.06924	15.0218	5.28821e-51	5.23727e-50	10.1278	10.4717	11.143	11.3718	10.7979	56360	Acot9	0.422177	0.535825	0.853303	1	0.671784	56360	Acot9	24.1264	30.1268	53.2619	54.2388
11430	Acox1	-0.0771772	0.461573	0.62553	-0.233727	0.0270869	0.0486504	0.0769725	0.469639	0.565209	0.403507	0.000135595	0.000433078	11430	Acox1	-0.0771771	-0.736258	0.461574	0.625532	-0.310904	-2.95028	0.00317485	0.00741185	-0.233932	-2.21661	0.0266499	0.0387361	0.169575	1.62025	0.105179	0.150243	10.6285	10.5769	10.4205	10.4736	10.739	11430	Acox1	0.92629	0.893726	0.801929	0.831945	1	11430	Acox1	21.0721	15.5156	9.07862	9.35672
80911	Acox3	-0.125259	0.144293	0.267361	-0.668971	1.69888e-14	9.36949e-14	-1.27929	7.91325e-44	1.38778e-42	0.348577	0.000199373	0.000621489	80911	Acox3	-0.125259	-1.45999	0.144293	0.267362	-0.79423	-9.14328	6.05888e-20	3.92187e-19	-2.07352	-22.8333	2.14166e-115	3.24745e-114	-1.72494	-19.4851	1.46782e-84	2.49954e-83	10.9636	10.8758	10.4214	9.62603	9.83002	80911	Acox3	1	0.940987	0.686746	0.3957	0.455797	80911	Acox3	33.9418	23.6857	10.1422	3.97054
74121	Acoxl	0.67937	0.173882	0.309006	0.415987	0.378718	0.478573	0.337516	0.460891	0.556918	1.11928	0.00683712	0.0160433	74121	Acoxl	0.679371	1.35984	0.173881	0.309007	1.09536	2.22884	0.0258243	0.0526029	1.43287	2.95073	0.00317025	0.00514664	2.55216	5.66011	1.51275e-08	4.36191e-08	2.84554	3.10019	3.32699	3.49851	4.1404	74121	Acoxl	0.407576	0.486256	0.569033	0.640871	1	74121	Acoxl	0.0621405	0.161953	0.0962684	0.081394
11431	Acp1	0.129244	0.0617036	0.136778	-0.0996657	0.163418	0.238185	-0.151464	0.0433317	0.0724087	0.0181488	0.808651	0.87361	11431	Acp1	0.129244	1.86842	0.0617035	0.136779	0.029578	0.418122	0.675858	0.89516	-0.121886	-1.67572	0.0937937	0.124467	-0.103737	-1.46679	0.142434	0.197142	8.98373	9.06857	9.00271	8.90569	8.9161	11431	Acp1	0.942885	1	0.955373	0.89324	0.899705	11431	Acp1	7.06746	6.22103	5.12163	3.79175
11432	Acp2	0.309599	1.75244e-09	1.51318e-08	0.0907212	0.0782912	0.125946	0.848972	1.34051e-61	3.88922e-60	0.531405	9.46165e-26	1.7011e-24	11432	Acp2	0.309599	6.01924	1.75243e-09	1.51317e-08	0.40032	7.77062	7.81032e-15	4.05981e-14	1.24929	24.4132	1.23784e-131	2.20819e-130	1.7807	34.9791	4.67737e-268	4.37175e-266	12.4007	12.593	12.65	13.2093	13.5778	11432	Acp2	0.44224	0.505303	0.525641	0.77459	1	11432	Acp2	45.4993	45.2408	39.2955	65.1409
11433	Acp5	1.19612	3.19306e-15	4.29423e-14	2.08836	7.99184e-53	1.47057e-51	-0.250166	0.0540802	0.0881182	-0.0439436	0.735778	0.821356	11433	Acp5	1.19612	7.88312	3.19298e-15	4.29413e-14	3.28448	22.6773	7.51258e-114	2.45625e-112	3.03431	20.814	3.23296e-96	3.95459e-95	2.99037	20.6023	2.61785e-94	5.12053e-93	7.1324	7.7897	9.14783	8.97617	8.94666	11433	Acp5	0.24734	0.390086	1	0.887815	0.869844	11433	Acp5	1.78286	3.81699	16.4102	10.1936
66659	Acp6	-0.119393	0.164955	0.296711	-0.857477	6.51943e-20	4.68325e-19	-1.75858	1.24959e-43	2.17687e-42	0.797278	2.25606e-09	1.27287e-08	66659	Acp6	-0.119393	-1.3886	0.164956	0.296711	-0.97687	-10.5717	4.03305e-26	3.23655e-25	-2.73545	-22.5593	1.0886e-112	1.59645e-111	-1.93818	-19.1829	5.14741e-82	8.43376e-81	8.64419	8.55924	7.976	6.91612	7.37445	66659	Acp6	1	0.942814	0.629294	0.301856	0.414735	66659	Acp6	14.3209	10.7005	4.62861	1.04232
56318	Acpp	-0.607119	0.016944	0.0469175	0.217423	0.436771	0.535214	1.61913	4.51472e-11	1.99445e-10	0.127439	0.522067	0.641404	56318	Acpp	-0.607119	-2.38792	0.016944	0.0469176	-0.389696	-1.53104	0.12576	0.221163	1.22944	5.67891	1.35556e-08	3.12327e-08	1.35688	6.46795	9.93439e-11	3.22075e-10	4.80826	4.47005	4.59248	5.55517	5.64995	56318	Acpp	0.557988	0.441383	0.480474	0.936413	1	56318	Acpp	0.131362	0.0778094	0.0635958	0.150834
54137	Acrbp	-1.54381	5.67497e-31	1.51974e-29	-1.49623	1.08108e-16	6.72827e-16	1.48583	9.1932e-16	5.3602e-15	0.399084	0.00721835	0.0168446	54137	Acrbp	-1.54381	-11.5726	5.67506e-31	1.51976e-29	-3.04003	-17.8556	2.61537e-71	5.2429e-70	-1.55421	-11.146	7.49397e-29	3.32186e-28	-1.15512	-8.893	5.94799e-19	2.73156e-18	7.71887	6.67183	5.81434	6.66665	6.92126	54137	Acrbp	1	0.483959	0.267104	0.482223	0.5753	54137	Acrbp	7.0511	1.92012	0.655543	1.29777
94180	Acsbg1	-0.170594	0.609301	0.748687	-1.14841	0.00318317	0.00686589	-1.74372	0.0027472	0.00570772	1.0991	0.0678108	0.122405	94180	Acsbg1	-0.170593	-0.511069	0.609303	0.748688	-1.319	-3.45937	0.000541442	0.00139208	-3.06273	-5.6004	2.13859e-08	4.88331e-08	-1.96363	-4.7825	1.73127e-06	4.36132e-06	4.17923	4.07226	3.39383	2.76387	3.11073	94180	Acsbg1	1	0.928535	0.580192	0.374916	0.476814	94180	Acsbg1	0.435803	0.282668	0.0496432	0.0119923
264895	Acsf2	-0.389992	0.0744711	0.159011	-0.578609	0.0139778	0.0267067	-0.690632	0.0090953	0.0173098	-0.396515	0.163393	0.256834	264895	Acsf2	-0.389991	-1.78371	0.0744714	0.159012	-0.9686	-4.21593	2.48755e-05	7.33256e-05	-1.65923	-6.63736	3.19347e-11	8.28684e-11	-2.05575	-8.1507	3.61822e-16	1.49848e-15	6.21509	5.93633	5.5578	5.17763	4.95695	264895	Acsf2	1	0.8243	0.634066	0.487183	0.418082	264895	Acsf2	1.66894	0.894562	0.482542	0.238556
257633	Acsf3	-0.0582573	0.567145	0.713965	-0.424644	8.10549e-05	0.000216809	0.00291554	0.979457	0.985431	0.26051	0.018494	0.0392045	257633	Acsf3	-0.0582572	-0.57226	0.567146	0.713966	-0.482901	-4.55349	5.27623e-06	1.64771e-05	-0.479986	-4.46111	8.15361e-06	1.61654e-05	-0.219476	-2.12593	0.0335092	0.0529313	8.25416	8.21385	7.93563	7.94109	8.10962	257633	Acsf3	1	0.97245	0.801885	0.804928	0.904672	257633	Acsf3	6.64002	4.68503	3.77638	2.63876
14081	Acsl1	1.00055	1.70804e-10	1.62507e-09	1.90311	2.18313e-34	2.56677e-33	1.28421	1.13373e-16	6.94578e-16	0.441912	0.00428832	0.010497	14081	Acsl1	1.00055	6.38553	1.70801e-10	1.62505e-09	2.90366	18.5989	3.27826e-77	7.11821e-76	4.18787	26.8485	8.78161e-159	1.97408e-157	4.62978	29.691	1.00341e-193	4.91255e-192	11.0353	11.5349	12.6943	13.5945	13.9214	14081	Acsl1	0.135267	0.191242	0.427175	0.797221	1	14081	Acsl1	13.0265	20.2694	44.9641	115.282
74205	Acsl3	-0.201502	0.17694	0.312713	-1.4714	8.8756e-22	6.92059e-21	0.122874	0.434684	0.530998	0.883781	1.05056e-08	5.56176e-08	74205	Acsl3	-0.201502	-1.35024	0.176941	0.312713	-1.6729	-10.938	7.5874e-28	6.47654e-27	-1.55003	-10.1187	4.56556e-24	1.78719e-23	-0.66625	-4.44113	8.94881e-06	2.13561e-05	9.85384	9.70803	8.76046	8.83873	9.39143	74205	Acsl3	1	0.903871	0.468664	0.49479	0.725772	74205	Acsl3	14.795	11.1477	2.51979	2.71283
50790	Acsl4	0.347805	0.00508068	0.0164921	0.274179	0.027155	0.0487497	0.800403	1.04143e-10	4.49319e-10	-0.0781927	0.527086	0.646119	50790	Acsl4	0.347806	2.80188	0.00508064	0.016492	0.621985	5.01149	5.40108e-07	1.82731e-06	1.42239	11.4787	1.68844e-30	7.80736e-30	1.3442	10.8526	1.9379e-27	1.15544e-26	11.6454	11.8565	12.0315	12.5736	12.5167	50790	Acsl4	0.52553	0.608326	0.686769	1	0.961371	50790	Acsl4	26.7914	27.5311	20.5075	35.932
433256	Acsl5	0.520251	1.26214e-26	2.86847e-25	0.861339	4.15603e-71	1.09085e-69	0.962656	3.46801e-90	2.05411e-88	0.112134	0.0182569	0.0387339	433256	Acsl5	0.520251	10.68	1.26213e-26	2.86843e-25	1.38159	28.5296	5.0381e-179	3.03909e-177	2.34425	48.624	0	0	2.45638	51.0331	0	0	12.6113	12.9174	13.461	14.1171	14.1961	433256	Acsl5	0.333354	0.41215	0.600745	0.946658	1	433256	Acsl5	62.9658	74.67	114.643	185.065
68738	Acss1	-0.363282	0.0221247	0.0588313	-0.768602	4.95211e-06	1.52918e-05	0.671633	8.64461e-05	0.000221673	-0.146096	0.379136	0.504459	68738	Acss1	-0.363281	-2.28822	0.0221248	0.0588315	-1.13188	-6.83082	8.44324e-12	3.85383e-11	-0.460251	-2.84629	0.00442314	0.00708169	-0.606347	-3.7762	0.000159239	0.000339311	7.91941	7.66129	7.17952	7.61444	7.51775	68738	Acss1	1	0.836176	0.598785	0.809457	0.756985	68738	Acss1	4.20615	3.15475	0.843272	1.50929
60525	Acss2	-0.316416	0.0108815	0.0320215	-0.291386	0.0335192	0.0590414	1.36931	1.66956e-25	1.59207e-24	0.741991	2.70761e-11	1.83518e-10	60525	Acss2	-0.316416	-2.54648	0.0108816	0.0320213	-0.607802	-4.62581	3.73134e-06	1.18143e-05	0.761505	6.46828	9.91219e-11	2.51847e-10	1.5035	13.4681	2.40863e-41	1.96245e-40	7.24056	7.04804	6.86908	7.73773	8.24552	60525	Acss2	0.498284	0.436035	0.385166	0.703294	1	60525	Acss2	2.20974	1.34665	0.838814	1.97345
11459	Acta1	-0.682195	0.252747	0.407964	0.995832	0.101123	0.157854	-1.05368	0.106194	0.160302	0.140188	0.840784	0.894136	11459	Acta1	-0.682194	-1.1437	0.252748	0.407965	0.313638	0.578439	0.562968	0.782345	-0.740044	-1.15258	0.249082	0.303387	-0.599856	-1.00561	0.314604	0.396479	2.17806	1.90996	2.27807	1.88842	1.93691	11459	Acta1	0.933031	0.7748	1	0.763315	0.789407	11459	Acta1	0.173751	0.0995246	0.168235	0.0696689
11475	Acta2	-0.245976	0.376488	0.544121	-0.253745	0.411044	0.509657	0.488095	0.119983	0.178592	0.356273	0.211741	0.317053	11475	Acta2	-0.245975	-0.884383	0.376489	0.544123	-0.499721	-1.69265	0.090522	0.164454	-0.0116262	-0.040948	0.967337	0.974003	0.344646	1.30232	0.192808	0.258597	4.47652	4.29557	4.19663	4.46199	4.68256	11475	Acta2	0.866913	0.764725	0.714039	0.858227	1	11475	Acta2	0.699395	0.360553	0.367618	0.35522
11461	Actb	0.234221	0.000132186	0.000618268	0.511219	7.23624e-17	4.53957e-16	0.902844	3.75372e-49	7.82449e-48	-0.204935	0.00082169	0.00231628	11461	Actb	0.234221	3.82235	0.000132185	0.000618264	0.74544	12.1658	4.72762e-34	4.7458e-33	1.64828	26.903	2.02626e-159	4.58705e-158	1.44335	23.5583	1.03125e-122	2.80863e-121	17.8237	17.9669	18.2928	18.9022	18.7595	11461	Actb	0.473545	0.522962	0.655498	1	0.905857	11461	Actb	4604.98	4228.43	5550.78	8559.4
11465	Actg1	0.469561	3.02995e-08	2.31953e-07	0.300399	0.000357809	0.000884714	0.454582	4.90453e-08	1.72103e-07	-0.401771	1.25211e-06	5.28081e-06	11465	Actg1	0.469561	5.5397	3.02992e-08	2.31952e-07	0.76996	9.10494	8.63172e-20	5.54745e-19	1.22454	14.5871	3.39243e-48	2.22376e-47	0.822772	9.78068	1.36295e-22	7.05712e-22	9.31653	9.61313	9.80846	10.1154	9.84327	11465	Actg1	0.574804	0.706001	0.80836	1	0.828102	11465	Actg1	14.4981	15.7942	14.6015	17.061
56456	Actl6a	0.102953	0.0406546	0.0981786	0.147264	0.00383922	0.00816536	-0.112725	0.0298428	0.0515305	-0.27056	2.58064e-07	1.18036e-06	56456	Actl6a	0.102953	2.04704	0.0406545	0.0981784	0.250217	4.95729	7.14846e-07	2.39117e-06	0.137491	2.68202	0.00731794	0.0114262	-0.133069	-2.60325	0.00923439	0.0159147	10.4379	10.5049	10.602	10.5277	10.3521	56456	Actl6a	0.892445	0.93489	1	0.94979	0.840963	56456	Actl6a	33.8892	27.9044	26.7439	21.042
109711	Actn1	0.0945687	0.0547028	0.124508	0.6446	2.48229e-39	3.34438e-38	0.0220065	0.653163	0.731088	-0.977724	7.32709e-87	1.45762e-84	109711	Actn1	0.0945688	1.92123	0.0547027	0.124508	0.739169	15.0887	1.92288e-51	2.80188e-50	0.761176	15.5123	2.86454e-54	2.05911e-53	-0.216549	-4.37382	1.22093e-05	2.8803e-05	12.3885	12.449	12.8761	12.8916	12.2513	109711	Actn1	0.705601	0.735817	0.989343	1	0.64157	109711	Actn1	64.993	54.4213	68.8892	56.9802
60595	Actn4	-0.0126573	0.907315	0.949293	0.037706	0.729049	0.796988	-0.410968	0.000166129	0.000411482	-0.148489	0.174243	0.27064	60595	Actn4	-0.0126571	-0.116424	0.907317	0.946383	0.0250489	0.230292	0.817865	0.974041	-0.38592	-3.54058	0.000399255	0.00069973	-0.534409	-4.90635	9.2785e-07	2.3804e-06	12.4004	12.3877	12.4107	12.1462	12.0529	60595	Actn4	0.992932	0.984235	1	0.83251	0.780381	60595	Actn4	72.0344	59.465	40.6665	29.2093
56444	Actr10	0.249868	5.26402e-06	3.06129e-05	0.319784	5.49402e-09	2.17379e-08	0.208279	0.000138783	0.000346869	-0.238615	1.20265e-05	4.47792e-05	56444	Actr10	0.249868	4.55398	5.264e-06	3.06127e-05	0.569653	10.4094	2.24638e-25	1.76073e-24	0.777932	14.2238	6.52585e-46	4.07656e-45	0.539317	9.88156	5.00479e-23	2.62361e-22	10.8575	11.0174	11.2262	11.3661	11.2067	56444	Actr10	0.702881	0.785268	0.907585	1	0.895362	56444	Actr10	18.3683	17.6057	19.4292	18.5837
54130	Actr1a	-0.0452119	0.396494	0.563822	0.411073	1.43459e-14	7.9679e-14	0.413172	7.7912e-15	4.3197e-14	-0.00215926	0.967425	0.980506	54130	Actr1a	-0.0452118	-0.847898	0.396495	0.563823	0.365861	6.87797	6.07133e-12	2.78916e-11	0.779033	14.6828	8.31043e-49	5.50365e-48	0.776874	14.6861	7.91185e-49	7.50143e-48	12.2416	12.2134	12.4775	12.7536	12.7521	54130	Actr1a	0.701264	0.687665	0.825831	1	0.998994	54130	Actr1a	75.0171	55.6145	64.5342	73.4264
226977	Actr1b	0.316984	1.48923e-06	9.2883e-06	0.0737301	0.264752	0.357929	-0.465283	6.22581e-12	2.90402e-11	0.0375501	0.581911	0.693782	226977	Actr1b	0.316984	4.81268	1.48922e-06	9.28825e-06	0.390714	5.91108	3.39879e-09	1.33173e-08	-0.0745685	-1.10567	0.268868	0.325	-0.0370184	-0.555607	0.57848	0.659459	10.4536	10.66	10.7075	10.4051	10.4295	226977	Actr1b	0.838642	0.967623	1	0.810932	0.824721	226977	Actr1b	31.579	33.2857	24.1926	15.8301
66713	Actr2	0.19203	0.029544	0.0752628	0.540843	8.77156e-10	3.65195e-09	0.992504	2.03609e-29	2.26496e-28	-0.434981	7.87858e-07	3.39286e-06	66713	Actr2	0.19203	2.17615	0.0295439	0.0752625	0.732873	8.3083	9.70845e-17	5.49712e-16	1.72538	19.5727	2.64143e-85	2.86669e-84	1.2904	14.6372	1.6252e-48	1.53294e-47	14.107	14.2214	14.5674	15.2415	14.9403	66713	Actr2	0.455463	0.493052	0.626711	1	0.811572	66713	Actr2	206.416	192.578	190.542	344.041
74117	Actr3	0.321761	7.108e-10	6.41605e-09	0.259338	6.74535e-07	2.26035e-06	0.772703	8.68508e-50	1.83227e-48	-0.477754	4.06654e-20	5.18662e-19	74117	Actr3	0.321761	6.16367	7.10794e-10	6.41599e-09	0.581099	11.1332	8.64915e-29	7.57841e-28	1.3538	25.9881	6.75371e-149	1.38814e-147	0.876048	16.8094	2.08406e-63	2.57185e-62	13.7608	13.963	14.1311	14.6516	14.3255	74117	Actr3	0.539306	0.620418	0.697109	1	0.797682	74117	Actr3	213.493	217.616	197.046	288.103
242894	Actr3b	0.134447	0.692671	0.810816	-0.472462	0.208287	0.292605	0.42532	0.277574	0.367201	-0.587665	0.134254	0.218242	242894	Actr3b	0.134448	0.395234	0.69267	0.810815	-0.338015	-0.913975	0.36073	0.550908	0.087305	0.243808	0.807379	0.83885	-0.50036	-1.34987	0.177057	0.239462	3.61682	3.69516	3.45056	3.63856	3.35098	242894	Actr3b	0.947142	1	0.84405	0.961524	0.787753	242894	Actr3b	0.311646	0.333221	0.181051	0.11663
109275	Actr5	-0.373158	0.000111903	0.000529542	-0.0524543	0.602122	0.688541	0.0238901	0.816497	0.864352	0.264946	0.00867117	0.0198454	109275	Actr5	-0.373158	-3.86322	0.000111903	0.000529545	-0.425612	-4.34099	1.41843e-05	4.2697e-05	-0.401722	-4.0566	4.97918e-05	9.34824e-05	-0.136776	-1.42571	0.153953	0.211502	8.78378	8.53672	8.50467	8.52125	8.69395	109275	Actr5	1	0.842609	0.824097	0.833624	0.939632	109275	Actr5	10.2054	5.54995	4.8103	4.48007
67019	Actr6	-0.362318	0.000332829	0.00143816	-0.62212	1.99267e-08	7.59149e-08	0.0493968	0.676532	0.751351	0.389672	0.000621796	0.00179069	67019	Actr6	-0.362318	-3.58831	0.00033283	0.00143817	-0.984438	-9.13496	6.54284e-20	4.22961e-19	-0.935041	-8.56123	1.11667e-17	3.65098e-17	-0.545369	-5.306	1.12057e-07	3.06817e-07	8.26079	8.01682	7.61451	7.6498	7.89613	67019	Actr6	1	0.844414	0.638926	0.654746	0.776648	67019	Actr6	9.64943	5.90406	3.72106	2.91163
56249	Actr8	-0.298931	1.89457e-05	0.00010165	-0.461892	5.51685e-10	2.33403e-09	0.106909	0.168346	0.239127	0.430476	9.10615e-09	4.8467e-08	56249	Actr8	-0.298931	-4.27697	1.89457e-05	0.00010165	-0.760824	-10.4479	1.49877e-25	1.18081e-24	-0.653915	-8.92786	4.34312e-19	1.48304e-18	-0.223439	-3.19466	0.00139995	0.00269064	9.62669	9.42878	9.13445	9.20102	9.47975	56249	Actr8	1	0.871809	0.71092	0.744493	0.903161	56249	Actr8	20.7278	12.3724	7.51802	7.04482
11477	Acvr1	0.0222897	0.881874	0.932524	1.21667	2.98629e-16	1.82456e-15	0.132136	0.368798	0.464728	-1.22986	1.40264e-16	1.42667e-15	11477	Acvr1	0.02229	0.148596	0.881872	0.9297	1.23896	8.36399	6.06308e-17	3.46168e-16	1.3711	9.25198	2.2038e-20	7.84011e-20	0.141244	0.942234	0.346073	0.4296	8.93816	8.94175	9.74714	9.83888	9.0261	11477	Acvr1	0.535618	0.536954	0.93839	1	0.569284	11477	Acvr1	7.05345	5.63253	9.02249	7.4468
11479	Acvr1b	-1.01784	7.44326e-09	6.0679e-08	2.38366	3.37974e-42	4.9119e-41	1.01238	2.62122e-09	1.02167e-08	-0.182736	0.280694	0.398147	11479	Acvr1b	-1.01784	-5.7806	7.44337e-09	6.06799e-08	1.36582	7.95852	1.74105e-15	9.3235e-15	2.3782	13.9042	5.97644e-44	3.59235e-43	2.19547	12.8409	9.67692e-38	7.28871e-37	9.34702	8.78337	10.2011	10.9083	10.7812	11479	Acvr1b	0.338844	0.229258	0.612485	1	0.915632	11479	Acvr1b	9.07411	3.51433	10.0472	22.2094
11480	Acvr2a	0.823811	0.000112851	0.000533863	0.217483	0.305984	0.403658	-0.307294	0.149761	0.216015	-0.50244	0.0192402	0.0406009	11480	Acvr2a	0.823811	3.86116	0.00011285	0.000533857	1.04129	4.88041	1.05866e-06	3.49527e-06	0.734	3.42596	0.000612641	0.00105643	0.23156	1.07873	0.280707	0.359293	8.38332	8.899	9.04185	8.85411	8.51944	11480	Acvr2a	0.633527	0.905729	1	0.877985	0.696209	11480	Acvr2a	2.88636	4.23011	2.45524	2.27871
11481	Acvr2b	-0.213311	0.38346	0.550805	-0.925931	0.000693588	0.00165173	-0.957107	0.0041346	0.00834255	0.277539	0.424699	0.550477	11481	Acvr2b	-0.213311	-0.871536	0.383461	0.550804	-1.13924	-4.25903	2.05312e-05	6.09607e-05	-2.09635	-6.73609	1.62708e-11	4.2767e-11	-1.81881	-6.38561	1.70718e-10	5.47643e-10	5.49888	5.35655	4.77979	4.2867	4.37542	11481	Acvr2b	1	0.906055	0.607483	0.431618	0.458993	11481	Acvr2b	1.28964	0.91743	0.56393	0.233534
11482	Acvrl1	-0.0751105	0.432523	0.597752	-0.406567	3.20428e-05	9.00386e-05	0.972306	2.00789e-23	1.74217e-22	1.00192	2.42132e-26	4.54532e-25	11482	Acvrl1	-0.0751103	-0.78488	0.432524	0.597751	-0.481678	-4.95877	7.09412e-07	2.375e-06	0.490629	5.14186	2.72034e-07	5.89671e-07	1.49255	15.8823	8.4083e-57	9.32052e-56	10.0762	10.0313	9.77631	10.398	11.0897	11482	Acvrl1	0.495357	0.480169	0.40238	0.619153	1	11482	Acvrl1	11.8041	9.35382	6.60298	10.8878
109652	Acy1	0.00380047	0.986951	0.996055	0.252241	0.287068	0.382822	-0.777686	0.00265362	0.00552698	0.60729	0.0191734	0.0404878	109652	Acy1	0.00380088	0.0163564	0.98695	0.993109	0.256042	1.10414	0.269533	0.431502	-0.521644	-2.04879	0.0404826	0.0572729	0.0856458	0.36838	0.71259	0.775682	5.31344	5.30427	5.47316	5.01407	5.3731	109652	Acy1	0.895199	0.889527	1	0.727442	0.932994	109652	Acy1	1.0191	1.12122	1.15522	0.627897
71670	Acy3	-0.217921	0.609741	0.748878	-0.160881	0.72584	0.794642	-2.35747	0.000951714	0.00212763	1.70854	0.0193845	0.0408546	71670	Acy3	-0.21792	-0.510442	0.609742	0.74888	-0.378801	-0.855203	0.392439	0.590294	-2.73627	-3.94582	7.95284e-05	0.000147043	-1.02773	-2.18422	0.028946	0.0462068	3.23485	3.10284	3.03829	2.21622	2.72189	71670	Acy3	1	0.912559	0.872628	0.493586	0.700785	71670	Acy3	0.401779	0.0947633	0.114419	0.0663359
66204	Acyp1	0.205015	0.283081	0.443469	-0.439059	0.0241627	0.0439516	-1.20842	1.1499e-08	4.26988e-08	-0.298014	0.183972	0.283309	66204	Acyp1	0.205015	1.07342	0.28308	0.443468	-0.234044	-1.20452	0.22839	0.373763	-1.44247	-6.92485	4.3645e-12	1.1794e-11	-1.74048	-8.36956	5.78346e-17	2.48272e-16	7.37508	7.50291	7.21003	6.46234	6.28803	66204	Acyp1	0.915204	1	0.81627	0.486136	0.430808	66204	Acyp1	11.3075	10.0141	8.98204	2.82457
75572	Acyp2	0.481857	0.0180437	0.049533	-0.386751	0.0651413	0.106755	1.12173	5.85179e-08	2.04156e-07	-0.215336	0.270004	0.38657	75572	Acyp2	0.481857	2.36472	0.0180436	0.0495327	0.0951057	0.450016	0.652699	0.872758	1.21683	6.0593	1.36719e-09	3.29902e-09	1.0015	5.00788	5.5033e-07	1.43447e-06	6.07429	6.35523	6.13279	6.8359	6.69767	75572	Acyp2	0.589838	0.716645	0.614246	1	0.908629	75572	Acyp2	4.39977	4.19779	3.13091	5.4555
11486	Ada	0.102272	0.425249	0.590461	-0.307157	0.0232885	0.04245	-0.929382	4.51983e-09	1.73074e-08	-0.845471	5.83088e-06	2.25777e-05	11486	Ada	0.102272	0.797349	0.425248	0.59046	-0.204885	-1.53243	0.125416	0.220696	-1.13427	-7.44004	1.00655e-13	2.88177e-13	-1.97974	-11.9236	8.91586e-33	6.00106e-32	6.92672	6.99328	6.78828	6.19208	5.72115	11486	Ada	0.95491	1	0.867537	0.573871	0.414047	11486	Ada	3.91568	3.48653	2.45697	0.81866
75894	Adal	-0.670814	1.29047e-06	8.13138e-06	-0.546859	0.000661059	0.00158122	0.390006	0.0206877	0.0368532	0.592914	0.000105198	0.000341905	75894	Adal	-0.670814	-4.84122	1.29047e-06	8.13143e-06	-1.21767	-8.0177	1.07741e-15	5.82783e-15	-0.827668	-5.6023	2.1152e-08	4.83127e-08	-0.234754	-1.7485	0.0803774	0.117571	6.92997	6.49523	6.16286	6.39793	6.76696	75894	Adal	1	0.739827	0.587592	0.691576	0.893162	75894	Adal	3.2545	1.43111	0.817523	0.93358
11487	Adam10	-0.0108188	0.965085	0.983578	0.144848	0.558123	0.649633	0.213755	0.387486	0.484659	-0.158289	0.522046	0.641404	11487	Adam10	-0.0108179	-0.0437696	0.965088	0.980645	0.13403	0.542214	0.587671	0.809999	0.347785	1.40708	0.159404	0.202617	0.189495	0.766899	0.443142	0.529466	10.5347	10.4994	10.5971	10.7577	10.6408	11487	Adam10	0.856798	0.836096	0.894664	1	0.922184	11487	Adam10	19.2457	15.5936	8.21037	10.7907
11490	Adam15	-0.107987	0.0445958	0.105583	-0.134354	0.0129397	0.0249081	-0.416293	2.35115e-14	1.2743e-13	0.449582	1.56667e-16	1.58719e-15	11490	Adam15	-0.107986	-2.00845	0.0445959	0.105583	-0.242341	-4.49463	6.96903e-06	2.15802e-05	-0.658634	-12.1354	6.85331e-34	3.38933e-33	-0.209052	-3.88272	0.000103294	0.000224403	13.054	12.9814	12.8928	12.625	12.9154	11490	Adam15	1	0.950946	0.894319	0.742792	0.908434	11490	Adam15	142.443	105.139	80.8055	50.4578
11491	Adam17	0.687933	7.76801e-11	7.61782e-10	0.367885	0.000499773	0.00121487	0.372084	0.000428568	0.00100625	-0.427598	5.17375e-05	0.000176193	11491	Adam17	0.687933	6.50503	7.7679e-11	7.61771e-10	1.05582	9.98532	1.76738e-23	1.29813e-22	1.4279	13.5068	1.42603e-41	8.18591e-41	1.0003	9.4611	3.04706e-21	1.50977e-20	13.3061	13.7324	13.9752	14.2302	13.9411	11491	Adam17	0.52701	0.708172	0.837947	1	0.818396	11491	Adam17	91.7541	128.955	108.263	132.284
11492	Adam19	0.210181	0.199361	0.341896	-2.45684	2.01901e-44	3.09175e-43	1.19601	3.2172e-11	1.43295e-10	1.09374	1.01372e-10	6.44854e-10	11492	Adam19	0.210182	1.28338	0.19936	0.341894	-2.24666	-12.7975	1.69255e-37	1.85378e-36	-1.05065	-6.23102	4.63397e-10	1.14359e-09	0.0430905	0.262464	0.792964	0.842815	8.9785	9.1167	7.58527	8.29027	9.00141	11492	Adam19	0.908653	1	0.345935	0.563925	0.923199	11492	Adam19	6.34767	6.0057	0.625398	1.63059
280668	Adam1a	-0.64616	0.00684786	0.0214291	0.443969	0.0731368	0.118431	0.693724	0.0035266	0.00719301	-0.625092	0.00775038	0.0179553	280668	Adam1a	-0.64616	-2.70415	0.0068479	0.0214292	-0.202191	-0.859232	0.390212	0.587435	0.491533	2.15045	0.0315195	0.0453042	-0.133559	-0.575005	0.565288	0.647697	5.89298	5.50267	5.75921	6.2166	5.82361	280668	Adam1a	0.799063	0.609657	0.728302	1	0.761548	280668	Adam1a	1.11585	0.72647	0.579198	0.731869
11496	Adam22	-0.164129	0.369651	0.536764	-0.282496	0.153113	0.225319	-0.340088	0.118304	0.176411	-0.999996	5.98695e-05	0.000201689	11496	Adam22	-0.164129	-0.897125	0.369652	0.536765	-0.446625	-2.32765	0.0199308	0.041306	-0.786713	-3.84899	0.000118604	0.000216554	-1.78671	-7.873	3.46235e-15	1.38041e-14	5.86622	5.75273	5.55859	5.36686	4.81092	11496	Adam22	1	0.924348	0.807967	0.707422	0.481196	11496	Adam22	0.338169	0.234976	0.156275	0.125837
11497	Adam3	-0.411515	0.402686	0.569561	2.68693	5.45948e-10	2.31163e-09	1.77353	3.71364e-12	1.75782e-11	-0.29759	0.179671	0.277776	11497	Adam3	-0.411515	-0.836832	0.402687	0.569562	2.27542	6.1845	6.22995e-10	2.56142e-09	4.04895	11.7092	1.14346e-31	5.40711e-31	3.75136	10.8549	1.89107e-27	1.12792e-26	3.38671	3.31655	4.51698	5.69982	5.49775	11497	Adam3	0.201226	0.191675	0.440485	1	0.869307	11497	Adam3	0.131397	0.0263426	0.318064	0.688436
353188	Adam32	0.358714	0.343191	0.509695	-1.37123	0.00350029	0.00749019	1.23374	0.0115264	0.0215636	0.754886	0.0499303	0.0942492	353188	Adam32	0.358714	0.947882	0.34319	0.509693	-1.01252	-2.15145	0.0314404	0.0628681	0.221226	0.551028	0.581614	0.638762	0.976112	2.69417	0.00705641	0.012375	3.3227	3.50385	2.87136	3.44186	3.86993	353188	Adam32	0.684329	0.775884	0.500493	0.743254	1	353188	Adam32	0.188966	0.262274	0.0422231	0.135997
110751	Adam33	-0.195332	0.161543	0.291841	-1.12213	5.73969e-13	2.92786e-12	2.57759	4.98422e-65	1.57727e-63	-0.757715	1.66165e-08	8.6399e-08	110751	Adam33	-0.195332	-1.3999	0.161544	0.291842	-1.31747	-8.60108	7.89661e-18	4.70195e-17	1.26012	9.35766	8.15205e-21	2.93193e-20	0.502408	3.68621	0.000227617	0.000477408	7.76512	7.63542	6.97723	8.61594	8.09499	110751	Adam33	0.55447	0.506796	0.321144	1	0.696914	110751	Adam33	3.6974	2.44457	0.826995	4.07964
11498	Adam4	0.59019	0.11294	0.220609	-0.897497	0.0295624	0.052621	0.816553	0.0564677	0.0916849	-0.0505102	0.89641	0.931857	11498	Adam4	0.590191	1.58512	0.112939	0.220608	-0.307306	-0.731076	0.464733	0.675833	0.509246	1.30714	0.191164	0.239149	0.458736	1.20904	0.226649	0.298127	3.41017	3.70775	3.2414	3.65787	3.644	11498	Adam4	0.813619	1	0.723795	0.966016	0.956776	11498	Adam4	0.228986	0.290746	0.162592	0.157109
11501	Adam8	0.0293704	0.763712	0.859934	-0.376657	0.000116691	0.000305619	-0.84535	5.96704e-18	3.92534e-17	0.626214	1.60704e-10	1.00682e-09	11501	Adam8	0.0293706	0.300612	0.76371	0.859932	-0.347286	-3.55306	0.000380777	0.000995229	-1.19264	-12.1866	3.66299e-34	1.82333e-33	-0.566422	-5.79467	6.84561e-09	2.01811e-08	14.8046	14.825	14.5712	14.0351	14.4261	11501	Adam8	0.985971	1	0.838678	0.578361	0.758448	11501	Adam8	547.947	436.282	241.591	122.343
11502	Adam9	0.137836	0.331477	0.498044	0.693047	1.03292e-06	3.38894e-06	0.583803	3.77517e-05	0.000101291	-0.322439	0.0227763	0.0471915	11502	Adam9	0.137836	0.971146	0.331476	0.498042	0.830883	5.85902	4.65618e-09	1.80764e-08	1.41469	9.98101	1.84575e-23	7.12627e-23	1.09225	7.70611	1.29714e-14	5.0732e-14	12.1088	12.1862	12.6344	13.0334	12.8093	11502	Adam9	0.526839	0.555869	0.75836	1	0.856104	11502	Adam9	51.3143	45.6398	46.3579	66.5236
11504	Adamts1	2.24203	2.29451e-12	2.5469e-11	-2.45306	5.92548e-12	2.85646e-11	0.359492	0.385286	0.482369	-0.887799	0.0417036	0.0805467	11504	Adamts1	2.24203	7.01531	2.29446e-12	2.54685e-11	-0.211031	-0.538449	0.590267	0.812375	0.148462	0.387736	0.698211	0.744928	-0.739338	-1.7813	0.0748639	0.110212	3.54036	4.94927	3.47288	3.64758	3.18562	11504	Adamts1	0.376597	1	0.359387	0.40565	0.294503	11504	Adamts1	0.0363991	0.342974	0.0563897	0.047677
224697	Adamts10	-0.361148	0.000239322	0.00106136	-1.62532	2.52457e-54	4.79149e-53	-0.615481	8.97777e-08	3.07783e-07	1.22662	9.06155e-28	1.80971e-26	224697	Adamts10	-0.361148	-3.67342	0.000239323	0.00106136	-1.98646	-19.1146	1.90806e-81	4.37773e-80	-2.60194	-23.7982	3.48207e-125	5.85432e-124	-1.37533	-13.6456	2.14485e-42	1.78647e-41	10.0945	9.83964	8.77543	8.41795	9.15774	224697	Adamts10	1	0.83809	0.400803	0.312838	0.52242	224697	Adamts10	16.8845	11.5199	2.47088	1.42272
240913	Adamts4	4.93288	2.37713e-17	3.65959e-16	4.88771	1.79335e-67	4.4751e-66	-2.17598	2.72912e-16	1.64187e-15	-3.39128	4.27115e-30	9.75044e-29	240913	Adamts4	4.93288	8.4737	2.37714e-17	3.6596e-16	9.82059	17.1323	8.51829e-66	1.56967e-64	7.64462	13.3009	2.28805e-40	1.27916e-39	4.25333	7.22696	4.93928e-13	1.81041e-12	4.33072	5.91075	9.34807	7.69348	5.54836	240913	Adamts4	0.0308765	0.0923131	1	0.317627	0.0718079	240913	Adamts4	0.0581038	0.378582	11.3737	2.13823
229595	Adamtsl4	0.189128	0.211213	0.357538	-0.00165202	0.991564	0.994034	-0.155431	0.346397	0.44139	-0.277647	0.101888	0.17278	229595	Adamtsl4	0.189128	1.25024	0.211212	0.357537	0.187476	1.21306	0.225107	0.369212	0.0320451	0.19981	0.841629	0.868484	-0.245602	-1.53947	0.123688	0.173611	6.17645	6.29223	6.29528	6.19393	6.01856	229595	Adamtsl4	0.920939	0.997892	1	0.932164	0.82547	229595	Adamtsl4	1.00546	0.933901	0.759181	0.604123
66548	Adamtsl5	-0.00946642	0.936037	0.965217	-0.257323	0.0345418	0.0606685	0.284003	0.021538	0.0382638	0.300588	0.0123629	0.0272758	66548	Adamtsl5	-0.00946625	-0.0802507	0.936038	0.962301	-0.266789	-2.21502	0.0267587	0.0543297	0.0172139	0.143642	0.885783	0.906481	0.317802	2.71744	0.00657884	0.0115807	8.34297	8.33513	8.17454	8.35658	8.55239	66548	Adamtsl5	0.864882	0.860196	0.769586	0.87308	1	66548	Adamtsl5	4.53604	3.72905	3.053	3.17
231821	Adap1	0.176148	0.0290217	0.0741172	-0.243248	0.00271866	0.00593739	0.445331	4.29429e-08	1.51298e-07	0.126415	0.117621	0.195134	231821	Adap1	0.176148	2.18319	0.0290216	0.074117	-0.0671003	-0.827908	0.407723	0.608854	0.378231	4.67908	2.88162e-06	5.87546e-06	0.504646	6.26567	3.71221e-10	1.16783e-09	11.5136	11.6251	11.4706	11.7602	11.8412	231821	Adap1	0.796841	0.860886	0.773432	0.945378	1	231821	Adap1	51.2559	43.933	34.6266	38.4943
216991	Adap2	-0.612058	0.000200656	0.000905078	1.58939	4.05548e-22	3.21651e-21	1.16571	8.31732e-13	4.11695e-12	-1.28424	3.16794e-15	2.89537e-14	216991	Adap2	-0.612058	-3.71819	0.000200658	0.000905087	0.977333	5.97758	2.26479e-09	8.98403e-09	2.14304	13.1354	2.0632e-39	1.13607e-38	0.858796	5.25301	1.49637e-07	4.06865e-07	10.5483	10.1777	11.1711	11.9904	11.0971	216991	Adap2	0.368029	0.284664	0.566711	1	0.538403	216991	Adap2	46.8169	23.7772	47.7459	82.6024
56417	Adar	-0.0349282	0.605657	0.745922	1.95136	2.28279e-186	2.34187e-184	0.715742	1.97147e-27	2.02249e-26	-0.7704	1.54521e-31	3.81766e-30	56417	Adar	-0.0349281	-0.516281	0.605658	0.745921	1.91643	28.7204	2.12542e-181	1.29788e-179	2.63217	39.5203	0	0	1.86177	27.9104	1.99468e-171	8.28597e-170	11.9492	11.928	13.1627	13.665	13.1257	56417	Adar	0.304426	0.299989	0.705954	1	0.688069	56417	Adar	23.4831	19.7963	57.6966	72.9438
110532	Adarb1	0.649017	0.00889815	0.0268893	-0.262222	0.298646	0.395741	-1.18122	0.000193226	0.000474628	1.03244	0.00113129	0.00310557	110532	Adarb1	0.649018	2.61594	0.0088981	0.0268891	0.386796	1.49195	0.135712	0.236631	-0.794421	-2.53353	0.011292	0.0172475	0.238021	0.916959	0.359164	0.443829	4.47575	4.86546	4.71298	4.07034	4.61772	110532	Adarb1	0.763282	1	0.899702	0.576297	0.842218	110532	Adarb1	0.187658	0.225731	0.14536	0.0601963
30947	Adat1	-0.65907	0.000206141	0.000925144	-0.0778272	0.69795	0.771009	-0.183583	0.398592	0.495616	0.172598	0.421338	0.547185	30947	Adat1	-0.659069	-3.71137	0.000206142	0.000925134	-0.736897	-3.97757	6.96244e-05	0.000196497	-0.920479	-4.68412	2.81161e-06	5.73635e-06	-0.747882	-4.1106	3.94634e-05	8.90131e-05	5.77024	5.34951	5.30088	5.18467	5.29511	30947	Adat1	1	0.747047	0.722282	0.666383	0.719402	30947	Adat1	1.10345	0.496615	0.425185	0.400311
66757	Adat2	-0.0311227	0.767905	0.862753	0.201307	0.0651442	0.106755	-0.543182	5.20565e-06	1.52696e-05	-0.0260725	0.833557	0.889902	66757	Adat2	-0.0311226	-0.295115	0.767906	0.862754	0.170185	1.60976	0.10745	0.191853	-0.372997	-3.21971	0.00128322	0.00216197	-0.39907	-3.58895	0.000332019	0.000685283	7.14546	7.12075	7.25616	6.91083	6.89542	66757	Adat2	0.926141	0.910412	1	0.78713	0.778768	66757	Adat2	4.47981	3.16549	3.5317	2.0842
100113398	Adat3	-0.408054	0.050123	0.115968	0.18366	0.407922	0.506988	0.586374	0.00638026	0.0124651	-0.138086	0.497893	0.621069	100113398	Adat3	-0.408053	-1.95891	0.0501232	0.115967	-0.224394	-1.07236	0.283556	0.45081	0.361981	1.80182	0.0715741	0.0972124	0.223895	1.13261	0.257379	0.332984	5.53802	5.28459	5.39507	5.75543	5.67263	100113398	Adat3	0.860105	0.721541	0.778967	1	0.944218	100113398	Adat3	1.43689	0.707534	0.805471	1.06133
72113	Adck1	0.130273	0.174995	0.310376	-0.671343	2.54716e-11	1.17658e-10	1.13391	1.57253e-29	1.75177e-28	-0.516744	9.92859e-08	4.76311e-07	72113	Adck1	0.130273	1.35633	0.174995	0.310374	-0.54107	-5.40694	6.41111e-08	2.30916e-07	0.592841	6.18264	6.30365e-10	1.54284e-09	0.0760961	0.78812	0.430627	0.516614	8.93182	9.01667	8.58408	9.32377	8.9813	72113	Adck1	0.762102	0.808267	0.59887	1	0.78869	72113	Adck1	10.7003	8.66813	5.34596	8.0759
57869	Adck2	-0.6397	3.9367e-14	4.90263e-13	-0.0630609	0.486694	0.583854	0.633134	1.76935e-12	8.54779e-12	-0.0638129	0.456708	0.581388	57869	Adck2	-0.6397	-7.56307	3.93672e-14	4.90265e-13	-0.702761	-8.12234	4.57295e-16	2.51747e-15	-0.0696267	-0.832388	0.40519	0.468231	-0.13344	-1.62107	0.105003	0.15003	8.86242	8.4466	8.40503	8.81685	8.77433	57869	Adck2	1	0.749595	0.728306	0.968908	0.940769	57869	Adck2	6.39221	3.36498	2.94866	3.57328
268822	Adck5	-0.318468	0.00121773	0.00467266	-0.657179	8.67686e-11	3.86689e-10	0.0814359	0.431606	0.527937	0.525239	2.51388e-07	1.15189e-06	268822	Adck5	-0.318468	-3.23469	0.00121774	0.00467268	-0.975646	-9.71292	2.65608e-22	1.86395e-21	-0.89421	-8.87272	7.13797e-19	2.42401e-18	-0.368972	-3.73822	0.000185326	0.00039261	10.1557	9.93636	9.51418	9.5679	9.90672	268822	Adck5	1	0.858961	0.641041	0.665358	0.841496	268822	Adck5	28.8399	18.572	10.2558	9.20679
210044	Adcy2	0.0595968	0.707805	0.820882	-0.181272	0.274101	0.368586	-1.19583	1.00315e-09	4.0508e-09	0.511046	0.0116185	0.0257557	210044	Adcy2	0.0595971	0.374807	0.707804	0.82088	-0.121674	-0.744238	0.456733	0.666739	-1.3175	-6.93091	4.18132e-12	1.13047e-11	-0.806455	-4.69992	2.60262e-06	6.47604e-06	6.54366	6.58475	6.45951	5.72623	6.01991	210044	Adcy2	0.971917	1	0.916847	0.551518	0.67603	210044	Adcy2	1.48663	1.21925	0.834215	0.276597
104111	Adcy3	-0.324694	0.0862119	0.177642	-0.334715	0.0870086	0.138325	-1.38635	2.54631e-10	1.06863e-09	-0.65631	0.00725641	0.0169215	104111	Adcy3	-0.324694	-1.71573	0.0862123	0.177643	-0.659409	-3.41926	0.000627915	0.0016036	-2.04576	-9.57767	9.92611e-22	3.66764e-21	-2.70207	-12.2159	2.5553e-34	1.77587e-33	7.33826	7.1028	6.87094	6.0344	5.68407	104111	Adcy3	1	0.849418	0.72331	0.405042	0.317717	104111	Adcy3	2.66957	2.11064	0.771806	0.393995
11513	Adcy7	-0.140373	0.404794	0.57154	-0.455227	0.00695682	0.0141133	-0.542052	0.00133892	0.00293146	1.0659	2.76023e-10	1.69396e-09	11513	Adcy7	-0.140372	-0.833087	0.404796	0.571542	-0.5956	-3.53229	0.000411979	0.00107312	-1.13765	-6.73881	1.59693e-11	4.19952e-11	-0.071756	-0.425858	0.670211	0.740087	12.8356	12.7331	12.4281	12.0967	12.7783	11513	Adcy7	1	0.931416	0.753895	0.599207	0.96104	11513	Adcy7	71.7172	54.693	21.9154	17.0336
11515	Adcy9	0.178459	0.430804	0.596333	-1.26021	9.12784e-08	3.29131e-07	-0.872639	0.000716652	0.00163117	0.391509	0.13393	0.217831	11515	Adcy9	0.17846	0.787819	0.430802	0.596334	-1.08175	-4.59574	4.3121e-06	1.35601e-05	-1.95439	-7.83461	4.70285e-15	1.40369e-14	-1.56288	-6.53981	6.15972e-11	2.02291e-10	7.26686	7.37321	6.53303	6.04195	6.24618	11515	Adcy9	0.928934	1	0.558571	0.397419	0.457857	11515	Adcy9	2.67348	2.49591	0.471358	0.321063
11518	Add1	-0.0946093	0.093035	0.188681	-0.0855129	0.132855	0.199607	-0.00217597	0.969743	0.978282	0.227919	6.47021e-05	0.000217205	11518	Add1	-0.0946092	-1.6796	0.0930352	0.188682	-0.180122	-3.18207	0.00146228	0.00356911	-0.182298	-3.20929	0.00133062	0.00223761	0.0456209	0.810527	0.417638	0.503713	11.9143	11.8525	11.7951	11.7949	11.945	11518	Add1	0.978943	0.937892	0.901347	0.901183	1	11518	Add1	49.9745	36.8705	25.6492	23.929
27360	Add3	0.0864973	0.549023	0.698018	-0.562034	0.000115277	0.000302068	-2.54599	5.50856e-56	1.36591e-54	-0.386021	0.0279028	0.0566037	27360	Add3	0.0864976	0.599227	0.549022	0.698019	-0.475537	-3.26808	0.00108279	0.0026868	-3.02153	-18.8565	2.60037e-79	2.59762e-78	-3.40755	-21.1674	1.90883e-99	3.96969e-98	9.54215	9.59893	9.20107	7.6302	7.42819	27360	Add3	0.961408	1	0.758983	0.255478	0.222096	27360	Add3	10.05	7.77498	3.60793	0.71079
215772	Adgb	1.13381	0.010039	0.029825	0.825801	0.0257033	0.0464352	1.21131	0.000144831	0.000361352	1.61135	1.50381e-09	8.64693e-09	215772	Adgb	1.13381	2.57448	0.010039	0.0298249	1.95962	4.66736	3.05102e-06	9.71918e-06	3.17093	7.96069	1.71086e-15	5.18157e-15	4.78227	12.5148	6.19818e-36	4.46606e-35	3.29599	3.78593	4.19872	4.92116	6.03303	215772	Adgb	0.149992	0.210647	0.280427	0.462694	1	215772	Adgb	0.0613498	0.0683302	0.085803	0.184952
70693	Adgra3	-0.0639576	0.815454	0.891395	-0.604781	0.0390229	0.0677174	-0.726734	0.0289146	0.0500434	0.189905	0.578188	0.690633	70693	Adgra3	-0.063957	-0.233394	0.815456	0.891397	-0.668738	-2.31645	0.0205335	0.0424709	-1.39547	-4.41489	1.01061e-05	1.9916e-05	-1.20557	-4.03286	5.51015e-05	0.000122771	5.29875	5.2763	4.8555	4.48214	4.5831	70693	Adgra3	1	0.984555	0.735476	0.567773	0.60893	70693	Adgra3	0.516648	0.366506	0.161618	0.0669289
13733	Adgre1	0.0355908	0.721107	0.830708	0.398496	6.42018e-05	0.000174043	0.512692	2.70421e-07	8.91334e-07	0.0033296	0.973351	0.984219	13733	Adgre1	0.035591	0.356982	0.721105	0.830706	0.434087	4.3542	1.33555e-05	4.03124e-05	0.946779	9.49777	2.14433e-21	7.84742e-21	0.950108	9.53188	1.54455e-21	7.72982e-21	15.6373	15.6581	15.9137	16.2587	16.2586	13733	Adgre1	0.650036	0.659487	0.78731	1	0.999927	13733	Adgre1	686.513	578.067	539.174	712.16
52614	Adgre4	0.109488	0.549896	0.698566	0.0988112	0.591094	0.678798	-0.139853	0.450218	0.546434	-0.681186	0.000281202	0.000857545	52614	Adgre4	0.109488	0.597918	0.549894	0.698564	0.2083	1.13553	0.256154	0.412934	0.0684468	0.371136	0.710536	0.755721	-0.61274	-3.29802	0.000973675	0.00190814	8.42826	8.49037	8.55856	8.47487	8.01989	52614	Adgre4	0.913641	0.953836	1	0.943644	0.688407	52614	Adgre4	4.1978	3.80957	2.77217	2.68821
26364	Adgre5	0.0410158	0.767705	0.862607	-0.993413	2.05205e-12	1.01478e-11	-1.35143	2.23149e-19	1.58415e-18	-0.47854	0.00240972	0.00621206	26364	Adgre5	0.0410161	0.295381	0.767703	0.862609	-0.952397	-6.75456	1.43273e-11	6.44471e-11	-2.30382	-15.5816	9.70221e-55	7.04034e-54	-2.78236	-18.6678	9.05645e-78	1.39102e-76	9.67771	9.70078	9.01336	8.17896	7.91398	26364	Adgre5	0.984137	1	0.620967	0.348247	0.289814	26364	Adgre5	13.6788	11.6949	3.43024	1.44244
77596	Adgrf1	3.27314	8.60543e-05	0.000415044	1.54217	0.00044709	0.00109426	-1.63893	0.000509496	0.0011837	-0.552093	0.321907	0.442954	77596	Adgrf1	3.27314	3.92689	8.60523e-05	0.000415034	4.81531	5.95641	2.57844e-09	1.01855e-08	3.17638	3.73246	0.000189617	0.00034045	2.62429	3.04736	0.00230862	0.00431212	1.69246	2.65947	3.53124	2.5892	2.37824	77596	Adgrf1	0.279558	0.546477	1	0.520498	0.449691	77596	Adgrf1	0.0406041	0.0814034	0.226062	0.0284919
14766	Adgrg1	-0.268563	0.465542	0.629239	-1.37387	0.00266382	0.00582735	-1.95475	0.0112736	0.021126	1.69086	0.0295771	0.0595404	14766	Adgrg1	-0.268562	-0.72975	0.465543	0.629241	-1.64243	-3.68512	0.000228597	0.000611337	-3.59718	-4.98186	6.29768e-07	1.33715e-06	-1.90632	-4.18474	2.85489e-05	6.52171e-05	3.64838	3.46903	2.77466	2.21239	2.63745	14766	Adgrg1	1	0.883101	0.545738	0.369593	0.496227	14766	Adgrg1	0.202516	0.092274	0.0534783	0.00861245
215798	Adgrg6	0.136325	0.258384	0.414877	2.49616	7.50744e-103	3.10097e-101	0.379529	0.000552669	0.00127593	-1.57485	2.96404e-45	1.25771e-43	215798	Adgrg6	0.136326	1.13022	0.258384	0.414876	2.63249	22.8846	6.6161e-116	2.21796e-114	3.01202	26.228	1.27253e-151	2.65628e-150	1.43717	12.3228	6.83238e-35	4.81958e-34	8.64433	8.71675	10.3276	10.6012	9.51267	215798	Adgrg6	0.257589	0.270849	0.827284	1	0.470245	215798	Adgrg6	2.25281	1.85262	7.67687	8.14953
239853	Adgrg7	-3.69164	0.0013586	0.00514996	3.22343	0.00858308	0.0171182	3.53697	5.33865e-07	1.71536e-06	-1.00517	0.0260865	0.0533147	239853	Adgrg7	-3.69164	-3.20331	0.0013586	0.00514997	-0.468207	-0.587365	0.556959	0.776074	3.06876	5.41066	6.27927e-08	1.40371e-07	2.0636	3.52693	0.000420401	0.000858973	1.73884	1.2769	1.6751	3.23816	2.64097	239853	Adgrg7	0.35372	0.256804	0.338432	1	0.661039	239853	Adgrg7	0.0263378	0	0.0127508	0.160171
330814	Adgrl1	0.126398	0.631961	0.765671	-0.760229	0.00818889	0.016405	-2.84321	2.42976e-08	8.78139e-08	0.918099	0.102792	0.174081	330814	Adgrl1	0.126399	0.478971	0.631959	0.765669	-0.63383	-2.22498	0.0260824	0.053085	-3.47704	-6.99891	2.57956e-12	7.0345e-12	-2.55895	-6.88624	5.72852e-12	1.99058e-11	4.81525	4.88727	4.40339	3.12382	3.41483	330814	Adgrl1	0.951307	1	0.71505	0.294543	0.360373	330814	Adgrl1	0.251956	0.187244	0.0841231	0.00812861
99633	Adgrl2	0.190708	0.26071	0.417605	2.35601	2.1954e-44	3.35531e-43	-1.76632	9.6994e-26	9.33999e-25	-1.19025	2.81687e-12	2.07746e-11	99633	Adgrl2	0.190709	1.12472	0.260709	0.417604	2.54671	15.1188	1.218e-51	1.78658e-50	0.78039	4.60733	4.07868e-06	8.23783e-06	-0.409862	-2.40512	0.0161673	0.0268855	10.0165	10.1304	11.7416	10.5073	9.7665	99633	Adgrl2	0.30248	0.32732	1	0.425049	0.254352	99633	Adgrl2	7.22316	6.86936	20.7425	6.26309
11532	Adh5	0.0977885	0.132452	0.249846	-0.211442	0.00128114	0.00293644	-0.355374	1.1035e-07	3.75555e-07	0.143479	0.0323384	0.0643844	11532	Adh5	0.0977885	1.5045	0.132452	0.249845	-0.113654	-1.73599	0.0825654	0.151469	-0.469028	-7.0755	1.48909e-12	4.0948e-12	-0.325549	-4.96481	6.87675e-07	1.78118e-06	11.2855	11.3492	11.2091	10.9817	11.073	11532	Adh5	0.956765	1	0.907429	0.775098	0.825736	11532	Adh5	75.5701	62.2154	51.2444	32.0195
76187	Adhfe1	1.59636	1.77231e-23	3.64405e-22	1.02588	1.5004e-15	8.85346e-15	0.793236	8.41293e-12	3.89182e-11	-0.0262175	0.812162	0.875586	76187	Adhfe1	1.59636	9.98504	1.77228e-23	3.64399e-22	2.62224	17.1156	1.13494e-65	2.08749e-64	3.41548	22.7668	9.78148e-115	1.4707e-113	3.38926	22.7662	9.92052e-115	2.46143e-113	6.02178	6.87618	7.53276	8.07144	8.0582	76187	Adhfe1	0.241541	0.436706	0.688403	1	0.990866	76187	Adhfe1	0.453255	1.36303	1.98587	2.66101
104923	Adi1	-0.0633828	0.484278	0.645107	-1.66028	4.28281e-61	9.49477e-60	-1.71011	2.67629e-36	3.72403e-35	1.48582	1.32253e-27	2.62076e-26	104923	Adi1	-0.0633827	-0.699435	0.48428	0.645105	-1.72366	-17.2523	1.07466e-66	2.00259e-65	-3.43376	-26.6882	6.44804e-157	1.42558e-155	-1.94794	-19.3483	2.10689e-83	3.52936e-82	9.15819	9.11376	7.99351	7.02889	7.85351	104923	Adi1	1	0.969678	0.446063	0.228568	0.404812	104923	Adi1	20.2889	15.1894	4.72625	1.19136
72674	Adipor1	0.066127	0.210156	0.35626	-0.619317	1.30687e-30	1.37669e-29	-0.52909	3.30981e-21	2.58462e-20	0.613896	2.99828e-28	6.24018e-27	72674	Adipor1	0.066127	1.25314	0.210155	0.356259	-0.55319	-10.3081	6.47604e-25	4.98733e-24	-1.08228	-19.7011	2.10833e-86	2.32422e-85	-0.468383	-8.7748	1.71215e-18	7.72912e-18	11.7737	11.8189	11.4065	11.0731	11.4629	72674	Adipor1	0.96915	1	0.751405	0.59637	0.781345	72674	Adipor1	89.2921	71.0627	38.0303	23.4133
68465	Adipor2	0.0205648	0.792047	0.877392	-0.352802	7.43177e-06	2.24931e-05	0.248254	0.00171859	0.00369621	0.153112	0.0516825	0.0970758	68465	Adipor2	0.0205649	0.263655	0.792046	0.877391	-0.332237	-4.23077	2.32892e-05	6.8882e-05	-0.0839829	-1.07043	0.284428	0.341853	0.0691288	0.885971	0.375633	0.461442	11.4387	11.451	11.2218	11.383	11.4828	68465	Adipor2	0.969875	0.978194	0.834547	0.933195	1	68465	Adipor2	35.659	27.9803	16.9723	17.7939
11534	Adk	0.274783	0.00555397	0.0178244	-0.0919839	0.358038	0.45713	-0.559205	7.22596e-08	2.49876e-07	-0.489606	5.25875e-06	2.05023e-05	11534	Adk	0.274783	2.77302	0.00555394	0.0178243	0.182799	1.82875	0.0674374	0.126296	-0.376405	-3.65852	0.00025368	0.00045064	-0.866011	-8.34561	7.08462e-17	3.02706e-16	9.08725	9.27132	9.21034	8.84489	8.53399	11534	Adk	0.880217	1	0.958618	0.744102	0.599849	11534	Adk	13.9398	14.1925	10.0921	5.9158
11535	Adm	7.74159	3.73797e-37	1.20798e-35	0.610719	8.24541e-05	0.000220177	-2.45242	4.49522e-43	7.69432e-42	-2.13425	3.31724e-17	3.52138e-16	11535	Adm	7.74159	12.7359	3.73738e-37	1.20779e-35	8.3523	13.7495	5.13153e-43	6.369e-42	5.89989	9.607	7.46924e-22	2.77131e-21	3.76563	5.94487	2.76681e-09	8.32219e-09	3.86709	7.27823	7.73583	5.99855	4.83104	11535	Adm	0.0684528	0.728194	1	0.299933	0.133527	11535	Adm	0.0772684	6.09305	8.32944	1.44584
11538	Adnp	-0.0555865	0.65221	0.782101	0.202333	0.101661	0.158572	0.493385	6.38255e-05	0.00016669	-0.295283	0.0165058	0.0353616	11538	Adnp	-0.0555863	-0.450692	0.652212	0.782103	0.146747	1.18969	0.234169	0.382275	0.640132	5.19903	2.00334e-07	4.36962e-07	0.344849	2.80118	0.0050916	0.00909729	10.9059	10.8638	10.9969	11.3291	11.1306	11538	Adnp	0.745765	0.724288	0.794316	1	0.871408	11538	Adnp	20.4579	16.0639	11.0773	15.6381
240442	Adnp2	0.253141	0.118862	0.229541	-0.912315	3.95288e-08	1.46781e-07	1.16371	2.69292e-12	1.28709e-11	0.23676	0.143976	0.231225	240442	Adnp2	0.253141	1.55957	0.118861	0.22954	-0.659173	-3.97236	7.11635e-05	0.000200555	0.504534	3.10204	0.00192194	0.00318467	0.741293	4.58856	4.46315e-06	1.09059e-05	8.73007	8.88573	8.31451	9.06429	9.22081	240442	Adnp2	0.711659	0.792736	0.533548	0.897182	1	240442	Adnp2	5.85177	5.44866	1.48023	3.5122
211488	Ado	0.53855	2.28101e-17	3.52223e-16	-1.08968	3.96029e-62	8.95688e-61	-1.1634	3.02806e-57	7.85594e-56	1.03065	2.51564e-45	1.07339e-43	211488	Ado	0.53855	8.47851	2.28098e-17	3.52219e-16	-0.551127	-8.38285	5.16613e-17	2.96743e-16	-1.71453	-24.0884	3.30773e-128	5.69831e-127	-0.683876	-10.404	2.37739e-25	1.3284e-24	10.5941	10.9671	10.2265	9.51288	10.1421	211488	Ado	0.772203	1	0.598495	0.364956	0.56449	211488	Ado	18.7409	22.3233	7.56208	3.22678
11540	Adora2a	4.6365	1.73516e-82	1.13586e-80	3.89886	4.58775e-170	4.11482e-168	0.149635	0.263202	0.351444	-0.793408	3.18343e-09	1.77258e-08	11540	Adora2a	4.6365	19.2393	1.73511e-82	1.13583e-80	8.53536	35.9764	1.95872e-283	2.55742e-281	8.685	36.6057	2.31759e-293	1.23347e-291	7.89159	33.2439	2.50089e-242	1.86152e-240	7.37679	8.75564	11.2767	11.3896	10.7996	11540	Adora2a	0.0619472	0.1611	0.924712	1	0.664338	11540	Adora2a	0.168441	3.25029	46.3187	42.0775
11541	Adora2b	3.38706	2.10181e-123	2.11813e-121	-1.23711	5.77939e-21	4.36751e-20	2.19412	5.74411e-63	1.73384e-61	-0.515039	4.72676e-05	0.000161762	11541	Adora2b	3.38706	23.6256	2.10159e-123	2.11791e-121	2.14995	14.6417	1.52292e-48	2.09307e-47	4.34407	30.436	1.83566e-203	5.65222e-202	3.82903	26.7914	4.06791e-158	1.51055e-156	7.59923	9.53902	8.73832	10.2091	9.84763	11541	Adora2b	0.163814	0.628476	0.360788	1	0.778373	11541	Adora2b	2.17968	15.7004	6.59291	26.6012
11542	Adora3	-0.716164	0.000690611	0.00279123	2.98301	1.87289e-52	3.4302e-51	0.679426	4.19116e-06	1.23981e-05	-0.467561	0.00132907	0.00360331	11542	Adora3	-0.716164	-3.39328	0.000690613	0.00279124	2.26685	13.3494	1.19383e-40	1.40861e-39	2.94627	17.5925	2.81263e-69	2.50179e-68	2.47871	14.746	3.264e-49	3.12713e-48	6.03604	5.68735	7.42878	7.90662	7.58085	11542	Adora3	0.273463	0.21475	0.71805	1	0.797871	11542	Adora3	0.736717	0.427545	3.14115	3.3738
72141	Adpgk	-0.0828135	0.35076	0.517725	0.351192	8.40609e-05	0.000224124	-0.683396	8.46695e-14	4.45665e-13	-0.00154907	0.986706	0.992733	72141	Adpgk	-0.0828134	-0.933114	0.350761	0.517726	0.268379	3.03387	0.0024144	0.00573914	-0.415017	-4.55902	5.13925e-06	1.03112e-05	-0.416567	-4.63337	3.59766e-06	8.84758e-06	9.66951	9.61422	9.84753	9.40205	9.39798	72141	Adpgk	0.883911	0.850679	1	0.73434	0.732268	72141	Adpgk	17.8494	13.6212	13.1432	6.43753
11544	Adprh	0.306842	0.00043112	0.00182227	0.370946	2.04482e-05	5.87432e-05	0.123767	0.154951	0.222497	-0.0867696	0.318123	0.439128	11544	Adprh	0.306842	3.52026	0.000431118	0.00182226	0.677788	7.78489	6.97734e-15	3.63444e-14	0.801555	9.20184	3.51876e-20	1.24411e-19	0.714785	8.21982	2.03808e-16	8.52223e-16	11.2507	11.445	11.6881	11.7725	11.714	11544	Adprh	0.696492	0.79689	0.943161	1	0.960288	11544	Adprh	57.9713	57.4349	70.664	58.4844
100206	Adprhl2	-0.381045	0.00268784	0.0094216	0.119419	0.351954	0.451308	-0.131561	0.308872	0.40113	0.276423	0.0317971	0.0634452	100206	Adprhl2	-0.381045	-3.00135	0.00268786	0.00942165	-0.261626	-2.05712	0.0396745	0.0778581	-0.393188	-3.07274	0.002121	0.00350152	-0.116765	-0.922047	0.356504	0.440939	9.65576	9.39985	9.47997	9.39983	9.57728	100206	Adprhl2	1	0.837462	0.885284	0.837451	0.947055	100206	Adprhl2	26.4949	16.7587	18.4032	12.3335
66358	Adprm	-0.400251	0.00100949	0.00394474	0.940053	1.15805e-14	6.46859e-14	1.07091	6.18618e-20	4.53095e-19	-0.769704	3.282e-11	2.20402e-10	66358	Adprm	-0.400251	-3.28787	0.0010095	0.00394476	0.539802	4.53352	5.80089e-06	1.80559e-05	1.61071	13.7515	4.98898e-43	2.94592e-42	0.841005	7.129	1.01104e-12	3.65049e-12	8.79737	8.55434	9.13937	9.8648	9.33812	66358	Adprm	0.477168	0.403193	0.604816	1	0.69415	66358	Adprm	12.2776	7.02579	12.2341	18.5129
11549	Adra1a	0.564478	0.000216729	0.000969301	-0.8347	8.69037e-08	3.14078e-07	-0.527009	0.00135635	0.00296715	0.752862	3.78013e-06	1.50205e-05	11549	Adra1a	0.564478	3.69868	0.000216727	0.000969294	-0.270222	-1.72543	0.0844503	0.154499	-0.797231	-4.94146	7.75378e-07	1.63724e-06	-0.0443685	-0.286476	0.774514	0.827967	8.12801	8.50357	7.934	7.62096	8.09868	11549	Adra1a	0.770807	1	0.673819	0.542386	0.755295	11549	Adra1a	3.9722	4.96425	1.49015	1.20662
11555	Adrb2	-1.61438	6.15117e-83	4.07895e-81	-3.10414	8.91822e-103	3.67403e-101	-0.677501	0.00141826	0.0030918	1.74844	1.03975e-19	1.29592e-18	11555	Adrb2	-1.61438	-19.2928	6.16916e-83	4.09087e-81	-4.71852	-33.5729	4.16641e-247	4.19729e-245	-5.39602	-30.5046	2.2611e-204	7.02953e-203	-3.64758	-33.6973	6.32832e-249	5.00485e-247	9.21585	8.01611	6.09186	5.78462	6.67426	11555	Adrb2	1	0.435355	0.114706	0.0927039	0.171753	11555	Adrb2	22.098	5.45463	0.578284	0.341477
56436	Adrm1	0.482235	3.93165e-07	2.64493e-06	0.114057	0.229351	0.317031	0.203072	0.0330072	0.0565405	0.15314	0.101754	0.172603	56436	Adrm1	0.482236	5.07224	3.93162e-07	2.64491e-06	0.596292	6.24405	4.26373e-10	1.77025e-09	0.799364	8.37586	5.48202e-17	1.74722e-16	0.952504	10.1507	3.28848e-24	1.77946e-23	8.62779	8.93112	9.00729	9.14309	9.24525	56436	Adrm1	0.651817	0.804335	0.847945	0.931641	1	56436	Adrm1	10.5787	11.652	12.1709	10.6659
11564	Adsl	-0.087988	0.227954	0.378556	0.0791404	0.288889	0.384859	0.156012	0.0380533	0.0644042	0.101759	0.169127	0.264249	11564	Adsl	-0.087988	-1.20564	0.227955	0.378557	-0.00884752	-0.120416	0.904154	0.974041	0.147165	1.99992	0.0455089	0.0638054	0.248924	3.44577	0.000569434	0.00114513	9.57382	9.51809	9.56698	9.67025	9.73794	11564	Adsl	0.892472	0.858657	0.888253	0.954164	1	11564	Adsl	16.2752	12.5611	10.3696	10.5406
11566	Adss	0.439104	1.24664e-05	6.84691e-05	0.0365135	0.716451	0.787041	-1.86616	8.37421e-74	3.23748e-72	-0.264666	0.0114079	0.0253402	11566	Adss	0.439104	4.36927	1.24663e-05	6.84685e-05	0.475618	4.7288	2.25854e-06	7.27883e-06	-1.39054	-13.546	8.37194e-42	4.83341e-41	-1.65521	-16.1412	1.31076e-58	1.49529e-57	11.4318	11.7301	11.7556	10.5438	10.3861	11566	Adss	0.798954	0.982435	1	0.43173	0.387028	11566	Adss	61.135	66.575	47.5253	11.8098
11565	Adssl1	0.00488247	0.951401	0.974494	-0.360661	8.14617e-06	2.45229e-05	-1.35327	4.78697e-58	1.26068e-56	-0.984208	3.7342e-28	7.72979e-27	11565	Adssl1	0.00488258	0.0609494	0.9514	0.971569	-0.355778	-4.41235	1.02257e-05	3.12117e-05	-1.70905	-20.454	5.52898e-93	6.55363e-92	-2.69326	-31.2979	4.97938e-215	2.97858e-213	11.1994	11.203	10.9527	10.0745	9.51305	11565	Adssl1	0.997537	1	0.840729	0.457398	0.309944	11565	Adssl1	73.045	55.3434	34.8246	12.505
11568	Aebp1	-0.964421	0.470496	0.633476	7.00225	2.73533e-11	1.26239e-10	0.916311	0.000764257	0.00173399	-1.19838	1.34075e-05	4.96559e-05	11568	Aebp1	-0.964423	-0.721674	0.470495	0.633475	6.03783	6.92257	4.43528e-12	2.05133e-11	6.95414	8.00565	1.1884e-15	3.6197e-15	5.75575	6.59203	4.33858e-11	1.43803e-10	2.42121	2.43381	4.66247	5.32278	4.48731	11568	Aebp1	0.133826	0.135	0.632745	1	0.5604	11568	Aebp1	0.00878469	0	0.348738	0.39451
11569	Aebp2	1.2116	2.12971e-32	5.878e-31	1.35457	1.25099e-40	1.73919e-39	-1.41422	5.82048e-44	1.02881e-42	-0.867253	2.6932e-17	2.88493e-16	11569	Aebp2	1.2116	11.8509	2.12966e-32	5.87787e-31	2.56617	25.1713	8.25806e-140	3.59407e-138	1.15195	11.2454	2.43969e-29	1.09229e-28	0.284699	2.77024	0.00560152	0.00995194	11.3224	12.0758	13.0159	12.0398	11.4918	11569	Aebp2	0.309175	0.521212	1	0.508334	0.347702	11569	Aebp2	15.4191	31.117	50.2597	17.434
68048	Aen	0.157106	0.0904123	0.184437	1.33332	4.37362e-50	7.64458e-49	0.189812	0.0262705	0.045837	-0.540208	3.3661e-10	2.04692e-09	68048	Aen	0.157107	1.69323	0.0904121	0.184436	1.49042	16.7915	2.81739e-63	5.03728e-62	1.68023	18.9313	6.29882e-80	6.36735e-79	1.14003	12.7618	2.67813e-37	1.98895e-36	8.65242	8.74379	9.61116	9.74166	9.37389	68048	Aen	0.470011	0.50074	0.913517	1	0.774978	68048	Aen	5.34917	5.54168	9.86479	10.1899
14797	Aes	-0.0681481	0.292333	0.454016	-0.305516	2.62466e-06	8.29908e-06	-0.964872	2.31452e-48	4.71802e-47	0.34846	1.4644e-07	6.89147e-07	14797	Aes	-0.068148	-1.05302	0.292334	0.454017	-0.373664	-5.75577	8.6246e-09	3.28592e-08	-1.33854	-20.3669	3.28559e-92	3.87165e-91	-0.990076	-15.1894	4.15756e-52	4.21133e-51	12.8844	12.8375	12.6322	12.0172	12.2318	14797	Aes	1	0.967965	0.839625	0.548188	0.636111	14797	Aes	278.19	210.937	154.456	63.9877
100302567	AF357399	0.971115	0.0420746	0.100719	-0.67679	0.171003	0.247129	0.666645	0.192997	0.269006	-0.600947	0.228238	0.337662	100302567	AF357399	0.971116	2.03278	0.0420744	0.100718	0.294326	0.561783	0.574264	0.795147	0.960971	1.93709	0.0527343	0.0732013	0.360024	0.704666	0.481018	0.567304	2.49083	2.92208	2.61359	2.8658	2.63659	100302567	AF357399	0.741619	1	0.80749	0.961747	0.820466	100302567	AF357399	2.27038	3.03444	2.1983	4.60235
70292	Afap1	0.0524847	0.775515	0.866789	0.519853	0.00465775	0.00975946	-0.520058	0.00676427	0.0131596	-0.51376	0.0137991	0.0301448	70292	Afap1	0.0524849	0.28517	0.775514	0.866788	0.572337	3.19343	0.00140595	0.00343668	0.052279	0.271776	0.785795	0.820241	-0.461481	-2.34339	0.0191096	0.0314416	5.62484	5.64582	5.98719	5.65979	5.33905	70292	Afap1	0.777895	0.789287	1	0.796971	0.638103	70292	Afap1	0.413908	0.420291	0.400768	0.236375
106877	Afap1l1	-0.425807	0.0408868	0.0985683	1.28149	3.13726e-10	1.3517e-09	-1.09518	1.91893e-07	6.41388e-07	0.124583	0.579024	0.691255	106877	Afap1l1	-0.425807	-2.04468	0.0408869	0.0985687	0.855678	4.58964	4.44003e-06	1.39469e-05	-0.239505	-1.11516	0.264782	0.320494	-0.114922	-0.567819	0.570158	0.652051	5.2918	5.03892	5.83268	5.15225	5.22106	106877	Afap1l1	0.687351	0.576835	1	0.623979	0.654461	106877	Afap1l1	0.553973	0.335278	0.61735	0.273817
17356	Afdn	0.195262	0.102427	0.203632	-0.341168	0.00476134	0.00995392	-0.0909214	0.458497	0.554778	-0.154413	0.208946	0.313696	17356	Afdn	0.195262	1.6332	0.102427	0.203631	-0.145905	-1.20922	0.226579	0.371321	-0.236827	-1.95142	0.0510069	0.0709383	-0.39124	-3.23573	0.0012133	0.00235147	9.53498	9.66172	9.44092	9.38084	9.2786	17356	Afdn	0.915902	1	0.85809	0.823088	0.766779	17356	Afdn	5.12605	4.45744	2.51898	1.83904
17355	Aff1	0.623988	1.22797e-08	9.78667e-08	1.85812	2.53872e-65	6.12101e-64	0.398445	0.000234262	0.000568752	-1.62755	8.65926e-51	4.68701e-49	17355	Aff1	0.623988	5.6958	1.22795e-08	9.78657e-08	2.48211	22.7642	1.03889e-114	3.41921e-113	2.88055	26.4269	6.72844e-154	1.4362e-152	1.253	11.4628	2.02862e-30	1.29495e-29	11.476	11.8339	13.059	13.3441	12.2324	17355	Aff1	0.273938	0.351059	0.820677	1	0.462757	17355	Aff1	12.0574	15.9221	36.3817	40.0275
93736	Aff4	0.723597	0.000119994	0.000564345	-0.11465	0.542187	0.635419	0.173667	0.356265	0.451874	-0.451501	0.0165103	0.0353663	93736	Aff4	0.723598	3.84614	0.000119993	0.000564338	0.608948	3.23407	0.00122038	0.00300305	0.782615	4.15643	3.23258e-05	6.14587e-05	0.331114	1.75786	0.0787707	0.115457	10.5317	10.9897	10.9098	11.0396	10.7404	93736	Aff4	0.703259	0.966033	0.913944	1	0.812732	93736	Aff4	8.04813	10.1931	4.83143	6.05005
215951	Afg1l	0.105484	0.304103	0.467629	-1.07497	2.98799e-19	2.08535e-18	1.07184	3.13156e-18	2.0934e-17	0.573586	4.42985e-08	2.19814e-07	215951	Afg1l	0.105485	1.02768	0.304102	0.467631	-0.969489	-8.18545	2.71277e-16	1.50806e-15	0.102347	0.96161	0.336245	0.397037	0.675933	6.80784	9.90762e-12	3.38836e-11	7.54972	7.61754	6.94791	7.61575	8.00053	215951	Afg1l	0.731633	0.766846	0.482095	0.765898	1	215951	Afg1l	3.41114	2.96531	1.00045	2.07908
114896	Afg3l1	-0.00267768	0.966922	0.985059	0.0387848	0.551962	0.644229	-0.0935952	0.155588	0.223227	0.37543	9.3611e-09	4.97548e-08	114896	Afg3l1	-0.00267761	-0.0414685	0.966922	0.982122	0.0361072	0.55698	0.577541	0.798937	-0.0574879	-0.880613	0.378527	0.441066	0.317942	4.94517	7.60783e-07	1.9622e-06	10.986	10.9844	11.0096	10.948	11.1957	114896	Afg3l1	0.864717	0.863764	0.879	0.842228	1	114896	Afg3l1	22.6516	17.2091	15.4932	11.6802
69597	Afg3l2	-0.0199082	0.825036	0.897387	-0.0296848	0.743909	0.809455	0.640428	1.56375e-12	7.58722e-12	0.40243	6.51065e-06	2.50515e-05	69597	Afg3l2	-0.0199081	-0.221071	0.825038	0.897261	-0.0495928	-0.548359	0.583445	0.805414	0.590835	6.58069	4.6826e-11	1.20808e-10	0.993265	11.1497	7.1868e-29	4.43613e-28	10.5042	10.4892	10.4721	10.8889	11.1627	69597	Afg3l2	0.63353	0.626979	0.619583	0.827105	1	69597	Afg3l2	21.8091	18.4453	12.5462	17.9125
71562	Afmid	-0.0164559	0.89867	0.943252	-1.11734	1.99097e-14	1.09305e-13	0.281475	0.0747938	0.117514	0.683117	2.95495e-06	1.19273e-05	71562	Afmid	-0.0164557	-0.12734	0.898671	0.940354	-1.1338	-7.86792	3.60592e-15	1.90581e-14	-0.852321	-5.97783	2.26127e-09	5.3973e-09	-0.169204	-1.29129	0.196602	0.26302	7.37569	7.35944	6.65122	6.82859	7.25902	71562	Afmid	1	0.988803	0.605222	0.684395	0.922319	71562	Afmid	4.20974	3.33307	0.900875	1.2986
11576	Afp	0.50834	0.00441573	0.0145996	-0.201203	0.263752	0.356822	-1.29766	6.32389e-11	2.76489e-10	0.8974	7.45363e-06	2.84938e-05	11576	Afp	0.508341	2.84683	0.0044157	0.0145995	0.307138	1.69687	0.0897218	0.16318	-0.990524	-5.02256	5.09874e-07	1.08776e-06	-0.0931239	-0.509027	0.610733	0.688121	7.04889	7.37579	7.23871	6.44114	6.98254	11576	Afp	0.797247	1	0.909362	0.523172	0.761415	11576	Afp	2.59181	2.92279	2.74067	0.765757
216549	Aftph	0.202822	0.00850964	0.0258884	1.05967	2.44259e-43	3.64439e-42	0.9226	9.38643e-34	1.21159e-32	-1.07386	4.13929e-45	1.72768e-43	216549	Aftph	0.202822	2.63115	0.0085096	0.0258885	1.26249	16.4602	7.09219e-61	1.21757e-59	2.1851	28.562	1.99134e-179	5.25563e-178	1.11124	14.4869	1.46514e-47	1.35631e-46	11.9739	12.0959	12.7743	13.4112	12.6742	216549	Aftph	0.369259	0.401865	0.643113	1	0.60002	216549	Aftph	41.1514	36.2944	63.0834	86.5982
11593	Aga	0.0600209	0.42405	0.589606	-0.126127	0.0997392	0.155911	-0.325876	4.04783e-05	0.000108173	0.130087	0.102083	0.173033	11593	Aga	0.0600209	0.799417	0.424049	0.589607	-0.0661061	-0.869338	0.384662	0.580754	-0.391982	-5.03148	4.86715e-07	1.04015e-06	-0.261895	-3.43545	0.000591567	0.00118732	9.73371	9.77217	9.68843	9.48053	9.56363	11593	Aga	0.973693	1	0.94361	0.816976	0.865414	11593	Aga	29.448	23.8803	20.7441	13.492
347722	Agap1	0.071773	0.443109	0.607931	-0.0358021	0.703551	0.776032	-2.74493	3.07402e-151	7.42305e-149	-0.741775	2.98073e-10	1.82344e-09	347722	Agap1	0.0717732	0.766955	0.443109	0.60793	0.035971	0.383257	0.701529	0.916681	-2.70896	-25.9628	1.30225e-148	2.66978e-147	-3.45074	-31.9126	1.78469e-223	1.13352e-221	10.4267	10.476	10.4486	8.70295	8.32077	347722	Agap1	0.966412	1	0.981207	0.292591	0.224499	347722	Agap1	9.7898	8.16102	5.38473	0.732885
216439	Agap2	-0.338717	0.0394332	0.0959095	-1.14695	4.09223e-09	1.63149e-08	-0.929974	0.000233948	0.000568166	1.21062	8.06703e-07	3.47109e-06	216439	Agap2	-0.338717	-2.05964	0.0394333	0.0959098	-1.48566	-7.83334	4.75096e-15	2.4957e-14	-2.41564	-10.5034	8.33345e-26	3.41431e-25	-1.20501	-6.7042	2.02513e-11	6.8349e-11	6.40247	6.17043	5.44516	4.93139	5.60245	216439	Agap2	1	0.851427	0.515016	0.360711	0.574342	216439	Agap2	1.02925	0.531687	0.213989	0.141787
213990	Agap3	-0.173983	0.0221026	0.0588043	-1.03476	2.28457e-40	3.14549e-39	-0.173925	0.0295452	0.0510615	0.963383	2.13082e-34	5.89167e-33	213990	Agap3	-0.173983	-2.2886	0.0221027	0.0588044	-1.20875	-15.5985	7.451e-55	1.16803e-53	-1.38267	-17.6818	5.79476e-70	5.19171e-69	-0.41929	-5.49539	3.89838e-08	1.09922e-07	11.5128	11.3909	10.7185	10.612	11.2286	213990	Agap3	1	0.919012	0.576638	0.535577	0.821225	213990	Agap3	37.983	24.8096	11.4104	8.5737
76223	Agbl3	-0.709453	0.00437568	0.0144891	-1.12491	0.000173545	0.000445236	-0.27923	0.427001	0.523733	0.657534	0.0506653	0.0954484	76223	Agbl3	-0.709452	-2.84973	0.0043757	0.0144892	-1.83437	-6.37252	1.85953e-10	7.87036e-10	-2.1136	-6.82813	8.60279e-12	2.29574e-11	-1.45606	-5.40656	6.42472e-08	1.78495e-07	5.4338	4.95298	4.29232	4.18835	4.52451	76223	Agbl3	1	0.71657	0.453296	0.421777	0.532446	76223	Agbl3	0.88947	0.278028	0.203732	0.107379
231093	Agbl5	-0.548951	0.00551076	0.0176968	-0.293796	0.163112	0.237849	-0.216942	0.330219	0.424011	0.159944	0.470697	0.595141	231093	Agbl5	-0.548951	-2.77555	0.00551079	0.0176969	-0.842747	-4.12831	3.6544e-05	0.000105799	-1.05969	-5.03005	4.90341e-07	1.04748e-06	-0.899744	-4.43315	9.28654e-06	2.213e-05	6.64684	6.30196	6.09459	5.98532	6.08049	231093	Agbl5	1	0.787375	0.681957	0.632212	0.675326	231093	Agbl5	1.67262	0.803387	0.388009	0.407525
11596	Ager	-0.73028	0.00127821	0.00487785	-1.279	5.23724e-06	1.61089e-05	1.49662	1.32788e-07	4.49189e-07	-0.0596492	0.805319	0.871206	11596	Ager	-0.730279	-3.22083	0.00127822	0.00487787	-2.00928	-7.44771	9.49707e-14	4.72378e-13	-0.512664	-2.22523	0.0260658	0.0379523	-0.572313	-2.53824	0.0111412	0.0189645	5.82759	5.34798	4.62554	5.4877	5.44571	11596	Ager	1	0.71717	0.434656	0.790104	0.767437	11596	Ager	2.70015	1.17114	0.326803	1.19025
15463	Agfg1	0.685252	2.00008e-12	2.22816e-11	1.02697	1.44868e-26	1.34072e-25	0.89747	4.26988e-21	3.31618e-20	-0.264893	0.00521452	0.0125453	15463	Agfg1	0.685252	7.03448	2.00006e-12	2.22814e-11	1.71222	17.7014	4.08786e-70	8.04838e-69	2.60969	27.0807	1.66014e-161	3.83382e-160	2.3448	24.3374	7.8812e-131	2.33176e-129	10.5131	10.9106	11.5653	12.1847	11.998	15463	Agfg1	0.313906	0.413458	0.650931	1	0.878591	15463	Agfg1	16.6451	20.5154	29.4008	52.0023
231801	Agfg2	-0.296087	0.0299283	0.0761025	-1.19651	2.74976e-17	1.75805e-16	-0.533918	0.000360669	0.00085631	2.1903	1.87249e-51	1.04301e-49	231801	Agfg2	-0.296086	-2.17104	0.0299284	0.0761029	-1.49259	-10.6146	2.54889e-26	2.05882e-25	-2.02651	-13.9902	1.78985e-44	1.08765e-43	0.163787	1.20616	0.227755	0.299462	9.49714	9.29486	8.51394	8.21014	9.60444	231801	Agfg2	0.92832	0.806876	0.469599	0.380428	1	231801	Agfg2	14.5734	9.46737	2.74899	2.13145
66549	Aggf1	-0.0905391	0.170815	0.304922	0.841866	2.23603e-37	2.85804e-36	-0.230336	0.000446878	0.00104656	-0.651222	1.3033e-22	1.92331e-21	66549	Aggf1	-0.0905391	-1.36959	0.170815	0.304923	0.751327	11.4964	1.37557e-30	1.26916e-29	0.520992	7.91518	2.46891e-15	7.45357e-15	-0.13023	-1.96426	0.0495004	0.0755363	10.9017	10.8444	11.3944	11.2419	10.8199	66549	Aggf1	0.710717	0.683041	1	0.899705	0.671541	66549	Aggf1	29.2851	21.7741	28.7	22.4042
69923	Agk	-0.133796	0.39657	0.563878	0.166739	0.304698	0.402537	0.442077	0.00589399	0.0116032	-0.575786	0.000333569	0.00100563	69923	Agk	-0.133796	-0.847762	0.396571	0.563879	0.0329432	0.207938	0.835278	0.974041	0.475021	3.04771	0.00230591	0.00378965	-0.100766	-0.636237	0.524622	0.609465	6.82334	6.72229	6.8378	7.13267	6.75686	69923	Agk	0.807015	0.752425	0.815144	1	0.770673	69923	Agk	2.58976	2.22742	1.25377	1.76488
77559	Agl	-0.14039	0.355893	0.523083	-0.599287	9.89363e-05	0.000261168	-0.264727	0.0905479	0.139296	1.28888	7.93484e-17	8.22924e-16	77559	Agl	-0.14039	-0.923217	0.355894	0.523085	-0.739676	-4.82065	1.43089e-06	4.68297e-06	-1.0044	-6.49788	8.14596e-11	2.08057e-10	0.284479	1.8755	0.0607242	0.0909591	9.82167	9.72372	9.33415	9.17118	10.0129	77559	Agl	0.875867	0.818372	0.624711	0.557982	1	77559	Agl	5.72064	3.86367	1.60303	1.35534
319660	Agmo	-0.191826	0.414777	0.581351	-0.139243	0.576927	0.666282	-1.59781	6.26336e-07	1.99573e-06	-1.73889	0.000258347	0.00079306	319660	Agmo	-0.191825	-0.815515	0.414778	0.581351	-0.331069	-1.36612	0.171901	0.292084	-1.92888	-6.22993	4.66641e-10	1.15141e-09	-3.66777	-8.58571	9.02742e-18	3.977e-17	5.14343	5.00894	4.91847	3.98575	3.29961	319660	Agmo	1	0.910994	0.85562	0.448234	0.278584	319660	Agmo	1.02334	0.860345	0.511406	0.0772123
236511	Ago1	-0.284053	0.00980635	0.0292544	0.505969	4.46971e-06	1.38513e-05	0.268633	0.014491	0.0266367	0.317105	0.00371995	0.00923686	236511	Ago1	-0.284053	-2.58258	0.0098064	0.0292545	0.221917	2.02339	0.0430329	0.0839013	0.49055	4.47628	7.59564e-06	1.50908e-05	0.807654	7.4024	1.33746e-13	5.02082e-13	10.6874	10.5058	10.8253	11.0079	11.2229	236511	Ago1	0.689935	0.608332	0.759135	0.861567	1	236511	37104	12.1937	8.07466	6.78563	8.63876
239528	Ago2	0.450567	0.113916	0.222146	0.410847	0.148671	0.21969	0.627814	0.0268169	0.0466908	-0.188076	0.50601	0.629144	239528	Ago2	0.450568	1.58084	0.113915	0.222145	0.861415	3.02573	0.00248033	0.00588459	1.48923	5.24208	1.58778e-07	3.47927e-07	1.30115	4.58231	4.59862e-06	1.12253e-05	8.25888	8.50107	8.76908	9.22568	9.07134	239528	Ago2	0.511639	0.605162	0.728702	1	0.898542	239528	37469	2.03291	2.21538	1.19217	2.23349
214150	Ago3	1.02375	7.76058e-11	7.61541e-10	0.878159	6.74422e-09	2.65573e-08	0.821628	2.71137e-08	9.73861e-08	-0.496052	0.000719925	0.00204902	214150	Ago3	1.02375	6.50517	7.76054e-11	7.61538e-10	1.90191	12.2537	1.60546e-34	1.62727e-33	2.72354	17.7035	3.94283e-70	3.53842e-69	2.22749	14.45	2.50681e-47	2.3102e-46	7.65863	8.25076	8.81178	9.38658	9.03898	214150	Ago3	0.301881	0.455073	0.671378	1	0.785889	214150	37834	1.04355	1.5831	1.69155	3.30824
76850	Ago4	-0.536618	6.5855e-11	6.4956e-10	-1.60937	5.39248e-68	1.35859e-66	-0.391618	0.000197933	0.000485735	0.461562	8.8476e-06	3.35215e-05	76850	Ago4	-0.536617	-6.52981	6.5855e-11	6.4956e-10	-2.14599	-23.6049	3.43317e-123	1.24207e-121	-2.5376	-26.3209	1.10578e-152	2.34167e-151	-2.07604	-23.2377	1.89444e-119	4.97027e-118	9.76921	9.39153	8.33841	8.10917	8.38088	76850	Ago4	1	0.769674	0.370925	0.31643	0.382006	76850	38200	10.0061	5.1435	1.21963	0.816275
55979	Agpat1	0.299939	3.20137e-08	2.44581e-07	0.236522	1.30362e-05	3.83391e-05	0.0989289	0.0687402	0.109092	0.128369	0.017348	0.0369489	55979	Agpat1	0.299939	5.53005	3.20135e-08	2.4458e-07	0.536461	9.89351	4.44182e-23	3.20904e-22	0.63539	11.6936	1.37489e-31	6.48622e-31	0.763759	14.19	1.05634e-45	9.43881e-45	11.1294	11.3205	11.4756	11.5412	11.6276	55979	Agpat1	0.707996	0.808296	0.90004	0.941911	1	55979	Agpat1	40.858	40.1016	41.9609	38.1529
67512	Agpat2	-0.252468	0.00148541	0.00555642	0.219635	0.00730354	0.0147708	1.01811	2.65715e-38	3.9383e-37	-0.271296	0.000307428	0.000931405	67512	Agpat2	-0.252468	-3.17752	0.00148542	0.00555644	-0.0328323	-0.413113	0.679524	0.898381	0.985278	12.9374	2.76717e-38	1.49001e-37	0.713983	9.39312	5.82515e-21	2.86126e-20	9.04191	8.88264	9.02029	9.69655	9.51078	67512	Agpat2	0.635234	0.56884	0.625787	1	0.87918	67512	Agpat2	26.3051	16.4429	18.5984	29.6207
28169	Agpat3	0.0148402	0.770982	0.864688	0.337944	4.43234e-11	2.0107e-10	0.277075	5.35476e-08	1.87232e-07	-0.179088	0.000398405	0.00118592	28169	Agpat3	0.0148402	0.291091	0.770981	0.864687	0.352784	6.94719	3.72642e-12	1.73114e-11	0.629859	12.4403	1.57815e-35	8.06281e-35	0.450772	8.9417	3.83221e-19	1.77377e-18	10.9031	10.9126	11.1303	11.3136	11.1955	28169	Agpat3	0.752353	0.757357	0.880706	1	0.921426	28169	Agpat3	25.0402	19.3773	19.5384	19.1504
68262	Agpat4	0.835197	4.53544e-17	6.86501e-16	0.942954	5.63877e-22	4.44308e-21	-1.36466	6.76614e-43	1.15311e-41	0.642259	1.333e-10	8.39937e-10	68262	Agpat4	0.835197	8.39816	4.53538e-17	6.86492e-16	1.77815	18.0175	1.41902e-72	2.89434e-71	0.413491	4.09543	4.21379e-05	7.954e-05	1.05575	10.6334	2.08327e-26	1.20245e-25	9.7648	10.2905	10.9318	10.0197	10.438	68262	Agpat4	0.445355	0.641145	1	0.531432	0.710165	68262	Agpat4	15.9223	23.2035	42.4279	13.294
52123	Agpat5	0.324846	5.3984e-06	3.13468e-05	-0.126575	0.0783915	0.126082	-0.0958367	0.188673	0.263799	0.393624	5.24468e-08	2.58155e-07	52123	Agpat5	0.324846	4.54868	5.39837e-06	3.13466e-05	0.198271	2.75702	0.00583304	0.0131399	0.102434	1.41454	0.157204	0.200199	0.496058	6.95532	3.51752e-12	1.23428e-11	10.6186	10.8284	10.7447	10.6838	10.9426	52123	Agpat5	0.798802	0.923875	0.871808	0.835753	1	52123	Agpat5	17.6778	16.7239	14.778	11.5158
228061	Agps	0.0353023	0.74577	0.847707	0.176308	0.1062	0.164633	0.445225	4.39252e-05	0.000116816	-0.246584	0.0233197	0.0481936	228061	Agps	0.0353025	0.324224	0.745769	0.847708	0.21161	1.9428	0.0520401	0.100009	0.656835	6.04168	1.52515e-09	3.67027e-09	0.410251	3.77531	0.000159807	0.000340478	10.945	10.9654	11.0777	11.3753	11.2093	228061	Agps	0.742136	0.752683	0.813617	1	0.891351	228061	Agps	14.104	10.8044	8.26485	10.41
11603	Agrn	-0.0364706	0.749377	0.849727	3.06432	2.86471e-165	2.43051e-163	-0.0412236	0.704568	0.775465	-0.642313	3.75068e-09	2.07336e-08	11603	Agrn	-0.0364704	-0.319459	0.749378	0.849728	3.02785	27.2725	9.00403e-164	4.82957e-162	2.98663	26.8801	3.75492e-159	8.47651e-158	2.34432	21.0713	1.45954e-98	3.00117e-97	9.9402	9.9161	11.8692	11.8394	11.3915	11603	Agrn	0.262611	0.25826	1	0.979524	0.718128	11603	Agrn	4.4347	3.83171	20.2607	16.4341
11604	Agrp	-1.45302	0.0285562	0.0731479	1.97994	0.00287995	0.00626436	0.227385	0.670365	0.745822	-0.780836	0.158826	0.250847	11604	Agrp	-1.45302	-2.18956	0.0285563	0.0731482	0.526923	0.984769	0.324738	0.504837	0.754308	1.4145	0.157215	0.200199	-0.0265281	-0.0477938	0.961881	0.970078	2.53602	2.0486	2.80004	2.92857	2.51818	11604	Agrp	0.761781	0.543378	0.914764	1	0.752417	11604	Agrp	0.699546	0.107881	0.260514	0.402766
67269	Agtpbp1	-0.0733842	0.469967	0.633097	0.196006	0.0559359	0.0933415	0.515551	4.12292e-07	1.33678e-06	0.218668	0.0288801	0.0583159	67269	Agtpbp1	-0.0733841	-0.722532	0.469967	0.633098	0.122622	1.20649	0.227627	0.372699	0.638173	6.32838	2.47746e-10	6.18422e-10	0.856841	8.57867	9.5979e-18	4.22493e-17	9.49054	9.44466	9.56634	9.90976	10.0558	67269	Agtpbp1	0.67581	0.654658	0.712267	0.903701	1	67269	Agtpbp1	7.72862	5.5903	4.35815	6.08737
11610	Agtrap	0.115991	0.0175402	0.0483326	1.08311	3.61606e-113	1.72516e-111	1.43184	9.24615e-217	5.58183e-214	0.0734596	0.0978381	0.166947	11610	Agtrap	0.115991	2.37518	0.0175402	0.0483325	1.1991	25.2414	1.40754e-140	6.19378e-139	2.63094	56.5339	0	0	2.7044	58.3269	0	0	11.1443	11.211	11.8741	12.8512	12.9039	11610	Agtrap	0.295332	0.3093	0.489783	0.964153	1	11610	Agtrap	18.2128	16.0442	30.2258	65.8715
226747	Ahctf1	0.189436	0.199885	0.342641	0.929745	2.76305e-10	1.19671e-09	-0.434235	0.00317987	0.00652776	-0.473779	0.0013569	0.00367097	226747	Ahctf1	0.189437	1.28188	0.199884	0.342641	1.11918	7.60495	2.85018e-14	1.44778e-13	0.684947	4.63804	3.5172e-06	7.13608e-06	0.211168	1.42832	0.153199	0.210554	9.98843	10.1018	10.7162	10.4311	10.1196	226747	Ahctf1	0.603858	0.65324	1	0.820728	0.661348	226747	Ahctf1	5.83624	5.37384	5.98634	4.57104
269378	Ahcy	0.121233	0.352204	0.519155	-0.217707	0.109752	0.169138	-0.243429	0.0941418	0.144203	0.12062	0.406365	0.531298	269378	Ahcy	0.121233	0.930325	0.352203	0.519154	-0.0964744	-0.716774	0.473513	0.686138	-0.339903	-2.42785	0.0151886	0.0228262	-0.219283	-1.63103	0.102884	0.147272	7.09641	7.16669	7.02847	6.88122	6.95594	269378	Ahcy	0.952451	1	0.90864	0.820473	0.864089	269378	Ahcy	2.7135	2.21527	1.92311	1.11234
229709	Ahcyl1	0.0518666	0.661351	0.788358	0.398985	0.000755866	0.00179053	0.0389807	0.742039	0.805466	-0.381749	0.0012784	0.00347394	229709	Ahcyl1	0.0518668	0.43805	0.66135	0.788359	0.450852	3.81059	0.000138635	0.000379182	0.489833	4.13767	3.50854e-05	6.65245e-05	0.108083	0.912744	0.361377	0.446094	11.4297	11.4578	11.7191	11.7486	11.4958	229709	Ahcyl1	0.801694	0.81744	0.979773	1	0.839247	229709	Ahcyl1	35.7355	30.2107	25.6936	25.2419
74340	Ahcyl2	0.129272	0.416331	0.582871	0.187392	0.239305	0.328707	0.154156	0.333171	0.427452	-0.746187	3.01466e-06	1.21586e-05	74340	Ahcyl2	0.129272	0.812806	0.41633	0.582869	0.316665	1.99069	0.0465147	0.0901749	0.470821	2.95948	0.00308161	0.00500765	-0.275366	-1.72569	0.0844031	0.123066	10.0646	10.1358	10.2632	10.3734	9.88309	74340	Ahcyl2	0.807309	0.848161	0.926453	1	0.711883	74340	Ahcyl2	10.5288	9.75952	6.07577	7.08211
230793	Ahdc1	-1.6283	1.51137e-24	3.23792e-23	0.420313	0.0157533	0.0298123	1.11974	3.5449e-12	1.68201e-11	0.55095	0.000138308	0.000441376	230793	Ahdc1	-1.6283	-10.2263	1.51138e-24	3.23795e-23	-1.20799	-7.74423	9.6162e-15	4.97765e-14	-0.0882401	-0.60928	0.542339	0.601215	0.46271	3.33019	0.000867854	0.00171054	7.37342	6.36616	6.59221	7.3086	7.68248	230793	Ahdc1	0.807164	0.401556	0.469674	0.771704	1	230793	Ahdc1	1.40618	0.345638	0.380812	0.801467
52906	Ahi1	-0.0442901	0.69395	0.811416	-0.0164897	0.890155	0.919686	1.04989	2.27766e-20	1.70482e-19	-0.194124	0.0592585	0.10918	52906	Ahi1	-0.0442899	-0.393499	0.693951	0.811415	-0.0607796	-0.525505	0.599232	0.821863	0.989111	9.30487	1.34153e-20	4.79803e-20	0.794987	7.55135	4.30783e-14	1.65145e-13	7.11879	7.08854	7.07842	7.76417	7.63393	52906	Ahi1	0.639321	0.626057	0.621683	1	0.91368	52906	Ahi1	1.21497	0.902916	0.703133	1.46337
66395	Ahnak	0.25368	0.013359	0.0382849	-0.0222752	0.82804	0.873508	-1.11743	1.35038e-27	1.39445e-26	-0.786742	1.96889e-14	1.6934e-13	66395	Ahnak	0.25368	2.47406	0.0133589	0.0382846	0.231405	2.25659	0.0240334	0.0491973	-0.886029	-8.6324	6.00781e-18	1.98323e-17	-1.67277	-16.2879	1.20251e-59	1.39305e-58	15.0256	15.1941	15.1796	14.4474	13.9734	66395	Ahnak	0.889817	1	0.990018	0.59599	0.429089	66395	Ahnak	105.651	103.372	64.1847	27.4459
100041194	Ahnak2	0.286129	0.0043634	0.0144528	0.179238	0.0743939	0.120268	-0.613283	1.56208e-09	6.21664e-09	0.243387	0.0168209	0.0359518	100041194	Ahnak2	0.286129	2.85062	0.00436338	0.0144529	0.465367	4.63448	3.57832e-06	1.13407e-05	-0.147916	-1.45745	0.144992	0.185939	0.0954713	0.948517	0.342867	0.426436	10.4888	10.6764	10.7928	10.3986	10.5536	100041194	Ahnak2	0.809956	0.922471	1	0.760884	0.847192	100041194	Ahnak2	17.3564	18.3464	14.0479	9.13017
11622	Ahr	-0.0626331	0.7433	0.846283	1.38423	2.44945e-13	1.27433e-12	-1.1478	1.48485e-09	5.91528e-09	-0.196931	0.30953	0.429862	11622	Ahr	-0.0626327	-0.327484	0.743302	0.846284	1.32159	7.05275	1.75413e-12	8.27097e-12	0.173794	0.905022	0.365454	0.427662	-0.0231368	-0.120893	0.903776	0.926704	7.69463	7.65874	8.58561	7.81649	7.69186	11622	Ahr	0.539247	0.525997	1	0.586775	0.53821	11622	Ahr	2.14943	1.33689	2.23791	0.823786
11624	Ahrr	-0.827184	4.52635e-07	3.02111e-06	-1.0237	1.20957e-08	4.67506e-08	1.29813	6.14766e-13	3.06135e-12	1.03546	3.09509e-10	1.88962e-09	11624	Ahrr	-0.827184	-5.04537	4.52639e-07	3.02114e-06	-1.85089	-10.5592	4.60326e-26	3.6852e-25	-0.552761	-3.35566	0.00079175	0.00135641	0.482703	3.0372	0.00238783	0.004453	8.07432	7.53825	6.91817	7.71244	8.39929	11624	Ahrr	0.798316	0.550558	0.358211	0.621209	1	11624	Ahrr	3.43515	1.33366	0.458521	1.06896
217737	Ahsa1	0.0366458	0.643857	0.775544	-0.297131	0.000189469	0.000484112	0.0846293	0.289493	0.380146	0.18327	0.0214872	0.0448289	217737	Ahsa1	0.036646	0.462315	0.643856	0.775543	-0.260485	-3.27637	0.0010515	0.00261324	-0.175855	-2.21031	0.0270833	0.0393092	0.00741484	0.0934884	0.925516	0.942183	12.38	12.4027	12.2092	12.265	12.384	217737	Ahsa1	0.984384	1	0.874462	0.908934	0.987081	217737	Ahsa1	182.265	151.803	111.434	88.2889
268390	Ahsa2	0.0295015	0.778053	0.868624	0.113516	0.289712	0.385792	0.289752	0.00689938	0.0134059	0.462999	6.14653e-06	2.3722e-05	268390	Ahsa2	0.0295016	0.281859	0.778052	0.868622	0.143018	1.35638	0.174978	0.296602	0.432769	4.13333	3.57546e-05	6.77454e-05	0.895768	8.91194	5.01474e-19	2.31266e-18	7.96187	7.98078	8.05585	8.24138	8.55251	268390	Ahsa2	0.664047	0.672808	0.708744	0.806007	1	268390	Ahsa2	3.17794	2.60188	2.18834	2.39155
98870	AI182371	-0.478286	0.324125	0.489591	-0.510052	0.34177	0.441262	0.295725	0.597583	0.682953	0.0357336	0.947237	0.967576	98870	AI182371	-0.478285	-0.986014	0.324126	0.489593	-0.988336	-1.9118	0.0559017	0.106655	-0.692611	-1.35488	0.175455	0.221027	-0.656877	-1.3272	0.184442	0.248409	3.49756	3.24608	2.99026	3.09385	3.10849	98870	AI182371	1	0.840029	0.703534	0.755907	0.763619	98870	AI182371	0.256436	0.0907244	0.102239	0.0705651
106672	AI413582	-0.083583	0.683269	0.803803	-0.615979	0.00273049	0.00596034	0.567844	0.00579994	0.0114338	0.297347	0.147362	0.235822	106672	AI413582	-0.0835823	-0.408003	0.683272	0.803806	-0.699561	-3.40591	0.000659433	0.00167912	-0.131717	-0.642149	0.520776	0.580554	0.16563	0.808772	0.418646	0.504559	10.7978	10.7246	10.3346	10.7088	10.8947	106672	AI413582	0.935051	0.888786	0.678292	0.879099	1	106672	AI413582	102.296	68.9585	61.9055	61.9597
381524	AI427809	-0.434369	0.110081	0.215933	-0.843823	0.00753051	0.0151888	-0.991616	0.014173	0.0260919	1.81539	2.02131e-06	8.34115e-06	381524	AI427809	-0.434368	-1.59783	0.110082	0.215934	-1.27819	-4.19839	2.68818e-05	7.88845e-05	-2.26981	-6.11694	9.53863e-10	2.31733e-09	-0.454421	-1.6568	0.0975592	0.140345	4.91866	4.60478	4.1607	3.6829	4.63021	381524	AI427809	1	0.804476	0.591331	0.424618	0.818778	381524	AI427809	0.99975	0.861224	0.242003	0.131536
621080	AI429214	-1.94709	1.76073e-09	1.51949e-08	0.424669	0.261722	0.354718	1.71522	8.68261e-08	2.9808e-07	0.0980191	0.701086	0.793843	621080	AI429214	-1.94709	-6.01847	1.76074e-09	1.5195e-08	-1.52242	-4.88276	1.04613e-06	3.45679e-06	0.192802	0.761117	0.446587	0.507978	0.290822	1.1898	0.234126	0.306564	4.77854	3.74598	3.92603	4.89522	4.9646	621080	AI429214	0.879002	0.429692	0.486809	0.953048	1	621080	AI429214	0.889685	0.182004	0.158224	0.356738
103729	AI450353	-1.33785	0.000126969	0.000596231	0.509056	0.176706	0.254036	0.370601	0.305726	0.39757	0.185148	0.590591	0.701344	103729	AI450353	-1.33785	-3.83226	0.00012697	0.000596236	-0.82879	-2.4466	0.014421	0.0305834	-0.458189	-1.37644	0.168685	0.213301	-0.273041	-0.853781	0.393227	0.479438	4.66662	3.94194	4.19476	4.40946	4.50148	103729	AI450353	1	0.605131	0.721034	0.836734	0.891843	103729	AI450353	1.37534	0.451626	0.59696	0.399342
101602	AI467606	-2.37805	7.23902e-151	9.01523e-149	-1.22263	5.69037e-27	5.34827e-26	1.0055	1.52771e-17	9.83552e-17	1.24628	6.02561e-36	1.78877e-34	101602	AI467606	-2.37805	-26.1618	7.23964e-151	9.016e-149	-3.60068	-33.7361	1.70812e-249	1.74739e-247	-2.59517	-26.9866	2.12097e-160	4.84926e-159	-1.34889	-15.687	1.855e-55	2.01284e-54	9.8562	8.22129	7.51138	8.08486	8.89565	101602	AI467606	1	0.32199	0.196852	0.292936	0.513862	101602	AI467606	32.2497	4.79609	1.97518	3.10576
229694	AI504432	1.13298	1.71608e-08	1.34736e-07	2.16621	4.34944e-28	4.22979e-27	-0.296059	0.129857	0.190985	-1.7975	8.42814e-20	1.05735e-18	229694	AI504432	1.13298	5.63843	1.71606e-08	1.34734e-07	3.2992	16.575	1.05673e-61	1.83642e-60	3.00314	15.0685	2.61079e-51	1.79177e-50	1.20563	6.00076	1.96394e-09	5.95079e-09	8.51919	9.15153	10.6232	10.4168	9.21418	229694	AI504432	0.232617	0.360576	1	0.866723	0.376579	229694	AI504432	2.28403	3.65293	10.8774	7.47326
433855	AI506816	0.0850214	0.818171	0.893111	0.657499	0.0725063	0.117459	0.135198	0.705466	0.776126	-0.714415	0.051567	0.0969088	433855	AI506816	0.0850222	0.229901	0.818169	0.893113	0.742521	2.05849	0.0395435	0.0776164	0.877719	2.42778	0.0151917	0.0228288	0.163304	0.441467	0.658875	0.730505	4.29644	4.27637	4.71874	4.79985	4.35841	433855	AI506816	0.705439	0.695694	0.945329	1	0.736399	433855	AI506816	0.281483	0.384763	0.371655	0.299267
100165	AI507597	0.268161	0.496743	0.655691	-3.53343	3.28364e-07	1.12828e-06	-0.810108	0.449891	0.546132	1.68307	0.0882892	0.1533	100165	AI507597	0.268162	0.679626	0.496741	0.655693	-3.26527	-4.72368	2.31613e-06	7.45714e-06	-4.07538	-4.48296	7.36146e-06	1.46364e-05	-2.3923	-4.34414	1.3982e-05	3.28202e-05	3.30356	3.45532	1.94525	1.83165	2.11336	100165	AI507597	0.900152	1	0.351092	0.324509	0.394484	100165	AI507597	0.699857	1.11421	0.0797222	0
98404	AI597479	-0.406815	5.09113e-08	3.81909e-07	0.230624	0.00333678	0.00717158	0.479726	4.05487e-10	1.67974e-09	-0.252474	0.000699855	0.0019956	98404	AI597479	-0.406815	-5.4481	5.09114e-08	3.81911e-07	-0.176191	-2.36092	0.0182295	0.0380143	0.303534	4.17383	2.99526e-05	5.71835e-05	0.0510604	0.706042	0.480162	0.566497	8.69965	8.43603	8.58404	8.90046	8.73237	98404	AI597479	0.870058	0.724757	0.803056	1	0.890017	98404	AI597479	6.12198	3.7439	3.10827	3.84094
99686	AI606473	0.607717	0.206131	0.35107	-1.932	0.00133416	0.00304772	-0.258191	0.731101	0.796789	-0.484247	0.549228	0.665487	99686	AI606473	0.607718	1.26428	0.206131	0.351068	-1.32429	-2.17262	0.0298088	0.0599558	-1.58248	-2.39968	0.0164094	0.0245517	-2.06672	-3.04205	0.00234971	0.00438538	2.52886	2.82016	1.95127	1.92287	1.78423	99686	AI606473	0.817165	1	0.547566	0.536891	0.487701	99686	AI606473	0.082184	0.13181	0	0.0153782
224833	AI661453	-0.688387	0.00290983	0.0101187	-1.64336	3.30285e-07	1.13464e-06	-1.80135	0.00141489	0.00308574	0.956686	0.108503	0.182242	224833	AI661453	-0.688386	-2.9771	0.00290984	0.0101187	-2.33175	-7.54119	4.65696e-14	2.34812e-13	-4.1331	-7.97776	1.49015e-15	4.52585e-15	-3.17641	-8.7302	2.54223e-18	1.14137e-17	4.94292	4.47216	3.51837	2.88681	3.15254	224833	AI661453	1	0.721586	0.372536	0.240464	0.289096	224833	AI661453	0.501871	0.276338	0.0547536	0.0132268
100043636	AI662270	0.313564	0.0177516	0.0488273	0.449247	0.000678846	0.00162007	-0.063776	0.629558	0.711107	-0.356204	0.00709177	0.0165749	100043636	AI662270	0.313564	2.37076	0.0177515	0.048827	0.762811	5.7698	7.93671e-09	3.03258e-08	0.699035	5.28481	1.25837e-07	2.76838e-07	0.342832	2.59166	0.00955141	0.0164232	12.042	12.2382	12.5337	12.4934	12.2576	100043636	AI662270	0.71122	0.814825	1	0.97248	0.825853	100043636	AI662270	118.909	110.813	162.367	110.164
107242	AI837181	-0.673951	2.15385e-17	3.32924e-16	1.58496	1.59339e-89	5.35543e-88	0.203414	0.00793506	0.0152632	-0.583954	3.12069e-14	2.64542e-13	107242	AI837181	-0.67395	-8.48518	2.15387e-17	3.32927e-16	0.911012	11.8201	3.0749e-32	2.96667e-31	1.11443	14.4625	2.09147e-47	1.34842e-46	0.530472	6.85754	7.00571e-12	2.41957e-11	10.4587	10.0464	11.0584	11.1991	10.8032	107242	AI837181	0.598584	0.449764	0.907083	1	0.759979	107242	AI837181	35.2011	17.5967	50.8803	46.8181
100740	AI839979	-0.840752	3.25041e-13	3.81231e-12	-1.87548	1.80423e-34	2.12447e-33	-0.847161	5.14173e-05	0.000135615	1.31015	5.51115e-11	3.61231e-10	100740	AI839979	-0.840752	-7.28358	3.25078e-13	3.81228e-12	-2.71624	-18.3139	6.41233e-75	1.34666e-73	-3.5634	-19.4192	5.30838e-84	5.67298e-83	-2.25325	-16.7234	8.85055e-63	1.08006e-61	7.79216	7.19398	5.99298	5.56535	6.26332	100740	AI839979	1	0.660589	0.287339	0.213631	0.346556	100740	AI839979	14.5691	5.92717	1.74118	0.684391
100048701	AI847159	-1.26257	0.256658	0.412661	-2.47795	0.0887182	0.140602	-0.561475	0.741125	0.80453	0.885456	0.597098	0.707429	100048701	AI847159	-1.26257	-1.13432	0.256659	0.412662	-3.74052	-2.68475	0.00725837	0.0161328	-4.30199	-3.03461	0.00240845	0.00395132	-3.41653	-2.5075	0.0121589	0.0205903	0.887644	0.496942	0.0716392	0.0198464	0.109291	100048701	AI847159	1	0.762759	0.568013	0.547983	0.583032	100048701	AI847159	0.176785	0	0	0
233168	AI987944	-0.786488	2.83939e-21	5.24653e-20	0.467009	1.16334e-07	4.15658e-07	0.404625	1.69468e-06	5.19322e-06	0.282776	0.000370903	0.0011088	233168	AI987944	-0.786488	-9.46848	2.8394e-21	5.24655e-20	-0.319479	-3.94778	7.88805e-05	0.000221486	0.0851457	1.0746	0.282556	0.339858	0.367921	4.86712	1.13234e-06	2.88835e-06	8.47722	7.97817	8.2694	8.53387	8.72205	233168	AI987944	0.843916	0.597132	0.730696	0.877713	1	233168	AI987944	5.99495	2.89519	3.51333	3.5538
11628	Aicda	-1.26958	0.0240991	0.0632647	-0.137661	0.833544	0.877367	1.07181	0.0873847	0.134972	0.1533	0.779829	0.853838	11628	Aicda	-1.26958	-2.25554	0.0240992	0.063265	-1.40724	-2.37758	0.0174264	0.0364739	-0.33543	-0.632895	0.526802	0.586418	-0.182129	-0.358696	0.719823	0.782364	2.93349	2.37844	2.29809	2.78352	2.86266	11628	Aicda	1	0.680636	0.643761	0.90127	0.952088	11628	Aicda	0.16323	0.118998	0.0287359	0.124951
108909	Aida	-0.0248705	0.737078	0.842139	1.96777	1.27981e-162	1.06285e-160	1.08182	9.94194e-55	2.37156e-53	-1.06051	7.96823e-53	4.78656e-51	108909	Aida	-0.0248704	-0.335724	0.737079	0.84214	1.9429	27.1123	7.04917e-162	3.701e-160	3.02472	42.4966	0	0	1.96421	27.4504	6.87463e-166	2.69899e-164	10.4944	10.4807	11.7113	12.4742	11.7254	108909	Aida	0.253522	0.251137	0.589316	1	0.595098	108909	Aida	13.6314	11.4446	37.3789	58.9878
11629	Aif1	0.0988697	0.47809	0.640316	-0.127334	0.361571	0.460875	0.014873	0.915253	0.938451	0.333547	0.0168833	0.0360745	11629	Aif1	0.0988701	0.70938	0.478089	0.640317	-0.0284643	-0.204046	0.838318	0.974041	-0.0135913	-0.0973762	0.922428	0.937751	0.319956	2.29622	0.0216631	0.0352795	11.8537	11.9105	11.8307	11.8423	12.0595	11629	Aif1	0.867062	0.901869	0.853344	0.860229	1	11629	Aif1	184.472	141.885	146.222	107.48
26926	Aifm1	-0.0171105	0.859061	0.918104	-0.307063	0.00189779	0.00423843	-0.465916	6.80005e-06	1.97371e-05	0.440018	1.99167e-05	7.19709e-05	26926	Aifm1	-0.0171103	-0.177568	0.859062	0.915547	-0.324173	-3.30568	0.000947466	0.0023661	-0.790089	-7.8113	5.66019e-15	1.68381e-14	-0.35007	-3.58478	0.000337363	0.000696053	9.25378	9.24237	9.03853	8.74003	9.02219	26926	Aifm1	1	0.992128	0.861398	0.700399	0.851697	26926	Aifm1	14.9052	12.3942	7.0356	4.97593
71361	Aifm2	-0.169545	0.0115947	0.0338365	-0.0935302	0.188323	0.268281	0.105486	0.150227	0.216585	0.837424	3.0545e-34	8.37008e-33	71361	Aifm2	-0.169545	-2.52424	0.0115947	0.0338365	-0.263076	-3.81265	0.000137482	0.000376289	-0.157589	-2.26691	0.0233955	0.0342755	0.679835	10.6218	2.36021e-26	1.35991e-25	9.0752	8.96492	8.90562	8.97094	9.53063	71361	Aifm2	0.729294	0.675623	0.648416	0.678447	1	71361	Aifm2	7.69231	5.18165	3.9326	3.62724
66253	Aig1	0.22101	0.0452097	0.10664	0.0962639	0.393842	0.493513	1.6151	4.13539e-55	9.92494e-54	-0.57421	5.12008e-10	3.06365e-09	66253	Aig1	0.22101	2.0027	0.0452096	0.10664	0.317274	2.83723	0.00455074	0.010412	1.93237	19.2251	2.28289e-82	2.39042e-81	1.35816	13.3349	1.44988e-40	1.15667e-39	7.18381	7.31527	7.37707	8.44863	8.05456	66253	Aig1	0.416149	0.455851	0.475804	1	0.760978	66253	Aig1	5.36576	5.4463	5.09738	11.8085
383619	Aim2	0.433827	1.48512e-05	8.08424e-05	1.64069	9.00016e-62	2.03261e-60	0.0959033	0.327041	0.420413	-1.62546	1.17869e-60	9.55303e-59	383619	Aim2	0.433827	4.33089	1.48511e-05	8.08419e-05	2.07451	20.9406	2.28685e-97	6.34753e-96	2.17042	21.8996	2.6218e-106	3.58945e-105	0.544961	5.4421	5.26559e-08	1.47236e-07	10.3995	10.6617	11.7474	11.8167	10.7314	383619	Aim2	0.37443	0.449061	0.953067	1	0.471277	383619	Aim2	20.1153	22.9279	56.8308	42.8522
13722	Aimp1	0.0998836	0.320114	0.48564	-0.122047	0.228373	0.31593	-0.090715	0.37582	0.472098	0.076856	0.452163	0.577138	13722	Aimp1	0.0998837	0.994225	0.320113	0.485639	-0.0221633	-0.219384	0.826351	0.974041	-0.112878	-1.11119	0.266486	0.322436	-0.0360223	-0.357295	0.720871	0.783246	10.0763	10.1389	10.0606	10.0041	10.0511	13722	Aimp1	0.957494	1	0.947146	0.910804	0.940958	13722	Aimp1	41.1487	35.0191	31.1863	22.6009
231872	Aimp2	-0.03112	0.74521	0.847377	0.0175163	0.857538	0.896252	-0.640144	4.23531e-10	1.75079e-09	0.676834	3.10533e-11	2.09179e-10	231872	Aimp2	-0.0311199	-0.324961	0.745211	0.847377	-0.0136036	-0.140934	0.887922	0.974041	-0.653748	-6.48683	8.76586e-11	2.23463e-10	0.0230865	0.240745	0.809753	0.856674	8.99335	8.9716	8.98317	8.57498	9.00726	231872	Aimp2	0.990409	0.975586	0.983439	0.741089	1	231872	Aimp2	20.291	15.315	14.4735	7.80711
11632	Aip	0.132915	0.192738	0.3336	-0.0894417	0.38238	0.482269	0.146318	0.154073	0.221479	0.161615	0.114332	0.190425	11632	Aip	0.132916	1.30252	0.192737	0.333599	0.0434739	0.425069	0.670787	0.890583	0.189792	1.85504	0.0635908	0.0871055	0.351407	3.44627	0.000568379	0.00114322	11.2081	11.2918	11.235	11.3312	11.4377	11632	Aip	0.852886	0.90382	0.86894	0.928816	1	11632	Aip	71.1649	58.7892	55.4313	47.089
114230	Aipl1	-0.174922	0.439156	0.604021	-0.206551	0.400313	0.499906	-0.896987	0.00233799	0.00491326	-1.35459	0.000490228	0.00143472	114230	Aipl1	-0.174922	-0.773618	0.439157	0.604023	-0.381472	-1.61031	0.10733	0.191673	-1.27846	-4.58712	4.49402e-06	9.04829e-06	-2.63305	-7.59196	3.15096e-14	1.21503e-13	4.93224	4.81809	4.68589	4.17954	3.54774	114230	Aipl1	1	0.923928	0.843026	0.593491	0.383021	114230	Aipl1	1.26468	0.74705	0.481067	0.232421
104103	Airn	0.932373	1.15026e-10	1.11235e-09	-0.63749	2.04386e-05	5.87339e-05	-0.599172	0.000982542	0.00219436	1.12651	6.28828e-11	4.08845e-10	104103	Airn	0.932373	6.44576	1.15025e-10	1.11234e-09	0.294883	1.86453	0.062247	0.117507	-0.304289	-1.71205	0.0868866	0.116097	0.822223	5.58647	2.31735e-08	6.61929e-08	5.79522	6.38649	5.97854	5.62004	6.315	104103	Airn	0.663759	1	0.753691	0.58786	0.951652	104103	Airn	1.34929	1.79251	0.865722	0.577963
16475	Ajuba	-1.56828	1.37298e-07	9.78659e-07	0.0814438	0.815675	0.864181	-0.428234	0.268232	0.357218	1.34501	0.000157075	0.000496494	16475	Ajuba	-1.56828	-5.26883	1.37299e-07	9.78665e-07	-1.48684	-4.88123	1.05426e-06	3.48191e-06	-1.91507	-5.61925	1.91791e-08	4.39187e-08	-0.570064	-2.15718	0.0309914	0.0492332	4.73308	3.80182	3.85984	3.6272	4.37135	16475	Ajuba	1	0.524399	0.545917	0.464618	0.778227	16475	Ajuba	0.487389	0.173032	0.108147	0.0665001
11636	Ak1	0.144418	0.355661	0.522885	-0.591548	0.000398786	0.000981243	-1.86098	4.71056e-16	2.79429e-15	-0.439223	0.112097	0.187456	11636	Ak1	0.144418	0.923667	0.35566	0.522884	-0.44713	-2.69888	0.00695729	0.0155018	-2.30811	-10.4179	2.05425e-25	8.35474e-25	-2.74733	-12.1211	8.16748e-34	5.63098e-33	6.45369	6.54239	6.1483	5.05929	4.83833	11636	Ak1	0.940372	1	0.760972	0.357719	0.306921	11636	Ak1	2.46653	1.44729	1.19411	0.295496
11637	Ak2	0.715685	3.23424e-25	7.09772e-24	-0.0192917	0.779303	0.836314	-0.228152	0.00102521	0.00228286	0.403312	5.69434e-09	3.08655e-08	11637	Ak2	0.715686	10.3746	3.23419e-25	7.09762e-24	0.696394	10.0652	7.8694e-24	5.85149e-23	0.468242	6.7253	1.75231e-11	4.5976e-11	0.871555	12.6431	1.222e-36	8.94209e-36	11.1089	11.569	11.5572	11.4074	11.674	11637	Ak2	0.675909	0.929844	0.922225	0.831302	1	11637	Ak2	44.6991	63.0541	50.9294	37.933
56248	Ak3	-0.0819896	0.301167	0.464392	0.106091	0.185402	0.264865	-0.302947	0.000197011	0.000483546	-0.212678	0.00963925	0.0217779	56248	Ak3	-0.0819896	-1.03393	0.301167	0.464393	0.0241012	0.303134	0.761788	0.964684	-0.278846	-3.46063	0.000538907	0.000933893	-0.491524	-6.12013	9.35003e-10	2.87976e-09	10.293	10.2375	10.3067	10.1096	9.97412	56248	Ak3	0.9905	0.953153	1	0.872279	0.794102	56248	Ak3	23.2861	17.445	14.0339	10.863
11639	Ak4	0.158051	0.461505	0.62553	2.47966	6.75768e-39	9.00412e-38	1.37671	8.92526e-20	6.47969e-19	0.277257	0.0539788	0.100921	11639	Ak4	0.158051	0.736372	0.461504	0.625532	2.63771	14.1913	1.0379e-45	1.35692e-44	4.01442	22.1569	8.94871e-109	1.26169e-107	4.29168	23.8535	9.3244e-126	2.62199e-124	5.93228	6.01719	7.43659	8.38658	8.59558	11639	Ak4	0.157859	0.167428	0.447827	0.86514	1	11639	Ak4	0.241171	0.248657	1.01412	2.42401
68870	Ak8	0.0558086	0.809878	0.888738	-0.12879	0.593823	0.681284	-1.06135	0.000154364	0.000383916	-1.58946	1.90926e-05	6.91559e-05	68870	Ak8	0.055809	0.240585	0.809877	0.888736	-0.0729813	-0.306753	0.759032	0.964684	-1.13433	-4.16485	3.11551e-05	5.93594e-05	-2.72378	-7.98799	1.37153e-15	5.56802e-15	5.25826	5.2877	5.19817	4.55524	3.82024	68870	Ak8	0.979803	1	0.93983	0.60188	0.36162	68870	Ak8	1.17809	1.20363	0.526471	0.211965
11640	Akap1	-0.312207	0.00321213	0.0110545	0.276508	0.0104898	0.020581	-0.926627	6.93107e-16	4.06236e-15	0.262839	0.0250838	0.0514369	11640	Akap1	-0.312206	-2.94667	0.00321214	0.0110545	-0.0356979	-0.337676	0.735607	0.945277	-0.962325	-8.52864	1.48081e-17	4.81899e-17	-0.699486	-6.449	1.12593e-10	3.64097e-10	8.61798	8.40938	8.58771	7.99307	8.15688	11640	Akap1	1	0.865377	0.979233	0.648458	0.726428	11640	Akap1	5.49318	3.45516	3.17014	1.49758
56697	Akap10	-0.237553	0.0187392	0.0511123	-1.38992	1.53341e-39	2.07487e-38	1.57818	3.43552e-50	7.32663e-49	0.210421	0.0383964	0.0749529	56697	Akap10	-0.237553	-2.35068	0.0187392	0.0511125	-1.62747	-15.4962	3.68305e-54	5.70155e-53	-0.0492903	-0.486222	0.62681	0.680295	0.161131	1.60057	0.109473	0.155727	10.3756	10.217	9.35284	10.3416	10.483	56697	Akap10	0.928253	0.831597	0.456856	0.906628	1	56697	Akap10	19.1527	12.8887	3.13254	10.3866
219181	Akap11	0.111855	0.389663	0.557109	-0.340168	0.00969655	0.0191612	-0.337923	0.0117858	0.0220121	0.345623	0.00980807	0.0221169	219181	Akap11	0.111855	0.86023	0.389662	0.557107	-0.228313	-1.74039	0.0817901	0.15013	-0.566235	-4.26648	1.98584e-05	3.83866e-05	-0.220612	-1.68623	0.0917521	0.132734	9.40352	9.47187	9.24837	9.03918	9.25723	219181	Akap11	0.953724	1	0.856484	0.740875	0.861761	219181	Akap11	4.32905	3.60106	1.78857	1.47378
83397	Akap12	-0.466231	0.201552	0.344997	0.248728	0.53056	0.624591	2.93527	2.65708e-19	1.87694e-18	-1.40373	5.64012e-08	2.76642e-07	83397	Akap12	-0.466231	-1.27714	0.201553	0.344998	-0.217503	-0.597845	0.549943	0.769308	2.71776	9.44649	3.50374e-21	1.27353e-20	1.31404	4.32191	1.54685e-05	3.61752e-05	3.82393	3.61487	3.71264	5.50868	4.58318	83397	Akap12	0.311056	0.269095	0.287964	1	0.526496	83397	Akap12	0.0911009	0.0570749	0.0606435	0.266356
75547	Akap13	0.0622386	0.504003	0.661836	0.836392	2.30509e-19	1.61593e-18	-0.0684596	0.46031	0.556542	-0.234422	0.0115348	0.0255998	75547	Akap13	0.0622387	0.668207	0.504002	0.661834	0.89863	9.68536	3.47964e-22	2.43673e-21	0.830171	8.93535	4.05897e-19	1.38779e-18	0.595749	6.41542	1.40432e-10	4.52253e-10	11.4121	11.4496	11.9964	11.9528	11.7953	75547	Akap13	0.666963	0.684537	1	0.970272	0.86992	75547	Akap13	10.2003	8.35723	10.3103	9.17726
338351	Akap17b	-0.658572	0.000140524	0.000653277	-1.59503	1.53943e-12	7.66346e-12	0.389014	0.12759	0.188167	1.10262	5.72106e-07	2.5096e-06	338351	Akap17b	-0.658572	-3.80724	0.000140525	0.00065328	-2.2536	-10.3448	4.41982e-25	3.42639e-24	-1.86459	-8.86648	7.5494e-19	2.55995e-18	-0.761966	-4.33475	1.45926e-05	3.41997e-05	6.40885	5.96786	5.02978	5.24451	5.88851	338351	Akap17b	1	0.736627	0.384467	0.446169	0.697206	338351	Akap17b	1.02898	0.45778	0.128737	0.140621
11641	Akap2	1.0898	1.77833e-17	2.75157e-16	3.29935	1.72994e-190	1.89882e-188	-1.57361	1.77282e-50	3.81704e-49	-3.85611	1.1708e-148	5.97813e-145	11641	Akap2	1.0898	8.50742	1.77854e-17	2.75188e-16	4.38915	36.7543	9.90933e-296	1.41482e-293	2.81554	23.0273	2.48254e-117	3.82569e-116	-1.04058	-6.55476	5.57324e-11	1.8369e-10	7.19401	7.82423	10.1441	8.97847	6.68925	11641	Akap2	0.129399	0.200283	1	0.445765	0.0911973	11641	Akap2	0.605852	1.13676	7.97701	2.32548
11642	Akap3	-0.609124	0.0245611	0.0642353	-1.44503	4.31083e-05	0.000119209	0.939642	0.0126488	0.023501	0.494787	0.119771	0.198234	11642	Akap3	-0.609124	-2.24824	0.0245612	0.0642356	-2.05415	-6.04169	1.52507e-09	6.11942e-09	-1.11451	-3.70337	0.000212752	0.000380374	-0.619725	-2.26675	0.0234056	0.0379145	4.90729	4.52608	3.77457	4.23367	4.51668	11642	Akap3	1	0.76779	0.456054	0.626929	0.762803	11642	Akap3	0.53021	0.384478	0.109229	0.158318
432442	Akap7	0.216736	0.0449535	0.106249	-0.149034	0.178898	0.256624	0.463292	3.18901e-05	8.61526e-05	-0.855922	4.04653e-14	3.40576e-13	432442	Akap7	0.216736	2.00509	0.0449533	0.106248	0.0677023	0.613614	0.53947	0.758185	0.530995	4.88891	1.01394e-06	2.12598e-06	-0.324927	-2.896	0.00377947	0.00688058	8.00485	8.14171	8.04496	8.34964	7.80215	432442	Akap7	0.787425	0.865778	0.809623	1	0.684208	432442	Akap7	3.95214	3.45929	2.73491	2.87711
56399	Akap8	-0.410951	7.08146e-07	4.62366e-06	-0.377983	7.47001e-06	2.25914e-05	0.524247	6.01476e-10	2.46366e-09	0.306336	0.000242791	0.000748755	56399	Akap8	-0.410951	-4.95911	7.08151e-07	4.62362e-06	-0.788934	-9.42354	4.36112e-21	2.93492e-20	-0.264687	-3.18166	0.00146432	0.00245396	0.0416495	0.504908	0.613624	0.690479	11.0994	10.8273	10.5877	10.9243	11.1258	56399	Akap8	0.981915	0.813132	0.688668	0.869653	1	56399	Akap8	35.2516	20.7656	11.4179	14.8515
54194	Akap8l	-0.381082	1.36372e-08	1.08291e-07	-0.77135	1.23165e-26	1.14255e-25	0.052107	0.494703	0.587993	0.613142	6.53457e-17	6.81857e-16	54194	Akap8l	-0.381082	-5.67788	1.36372e-08	1.08292e-07	-1.15243	-16.2733	1.52746e-59	2.57553e-58	-1.10033	-15.3872	1.99626e-53	1.41722e-52	-0.487183	-7.20063	5.99365e-13	2.18761e-12	10.0551	9.79733	9.29969	9.33264	9.72704	54194	Akap8l	1	0.836373	0.592374	0.606057	0.7966	54194	Akap8l	29.9386	17.6553	8.09473	7.5487
100986	Akap9	0.115447	0.19392	0.335229	0.216085	0.0155578	0.0294745	-0.0944534	0.29409	0.385279	-0.584622	1.65427e-10	1.03513e-09	100986	Akap9	0.115447	1.29907	0.193919	0.335228	0.331532	3.73002	0.000191466	0.000515791	0.237079	2.64675	0.00812693	0.0126317	-0.347543	-3.84618	0.000119972	0.000258994	9.60962	9.6846	9.82974	9.76611	9.38599	100986	Akap9	0.858495	0.90429	1	0.956855	0.735219	100986	Akap9	3.7347	3.13396	2.68009	1.98214
57373	Akip1	0.117932	0.148841	0.273901	-0.567683	3.82009e-11	1.74252e-10	-1.00499	2.59076e-24	2.356e-23	0.53391	1.11459e-07	5.31218e-07	57373	Akip1	0.117932	1.44364	0.148841	0.2739	-0.449751	-5.2763	1.31817e-07	4.64907e-07	-1.45474	-15.2849	9.64214e-53	6.77648e-52	-0.920832	-10.5408	5.6026e-26	3.18682e-25	8.92863	9.00875	8.62821	8.00064	8.32594	57373	Akip1	0.945982	1	0.768151	0.497198	0.622954	57373	Akip1	23.6884	21.107	12.9194	4.41206
68050	Akirin1	0.405598	5.13708e-08	3.85168e-07	0.417149	1.7418e-08	6.67301e-08	0.648911	6.90624e-19	4.78378e-18	-0.163059	0.0241869	0.049791	68050	Akirin1	0.405598	5.4465	5.13704e-08	3.85165e-07	0.822747	11.0943	1.33631e-28	1.16471e-27	1.47166	20.0052	4.96319e-89	5.6617e-88	1.3086	17.8277	4.30985e-71	5.97783e-70	10.2663	10.5162	10.7847	11.2232	11.1111	68050	Akirin1	0.515141	0.612605	0.737877	1	0.925216	68050	Akirin1	21.2365	22.9424	21.6667	30.3579
433693	Akirin2	0.0151337	0.766314	0.861597	-0.251322	1.99499e-06	6.3931e-06	0.201972	0.000187855	0.000462304	-0.174005	0.00116782	0.00319726	433693	Akirin2	0.0151338	0.2972	0.766314	0.861597	-0.236188	-4.52202	6.12509e-06	1.9059e-05	-0.0342158	-0.655738	0.511993	0.57255	-0.208221	-4.02495	5.69864e-05	0.000126765	10.4015	10.4115	10.2473	10.3778	10.2653	433693	Akirin2	0.99308	1	0.892379	0.976914	0.903601	433693	Akirin2	38.8799	30.8219	20.7562	20.0562
100182	Akna	1.16401	7.00636e-42	2.54925e-40	0.818339	6.21893e-22	4.8904e-21	0.0991478	0.242281	0.326846	-0.519333	9.52664e-10	5.57406e-09	100182	Akna	1.16401	13.559	7.00621e-42	2.5492e-40	1.98235	23.1588	1.18573e-118	4.07834e-117	2.0815	24.3088	1.58293e-130	2.78669e-129	1.56217	18.2277	3.11323e-74	4.51212e-73	11.2727	11.9788	12.5207	12.5918	12.2406	100182	Akna	0.400807	0.653869	0.951917	1	0.783947	100182	Akna	16.0958	29.951	34.484	35.916
58810	Akr1a1	0.153798	0.182785	0.320392	-0.0716891	0.534655	0.628374	0.14413	0.211945	0.291968	-0.140453	0.223819	0.332247	58810	Akr1a1	0.153799	1.33223	0.182784	0.32039	0.0821097	0.711197	0.476962	0.690027	0.226239	1.95956	0.0500476	0.0696765	0.0857863	0.743068	0.457441	0.543667	15.7006	15.7977	15.7504	15.8476	15.7517	58810	Akr1a1	0.903097	0.965986	0.934849	1	0.935676	58810	Akr1a1	1546.46	1336.34	1253.46	1026.79
67861	Akr1b10	-0.212966	0.000820128	0.00327069	-0.323803	1.02694e-06	3.37074e-06	-0.328411	2.52332e-06	7.618e-06	0.197984	0.0045411	0.0110519	67861	Akr1b10	-0.212966	-3.34591	0.000820131	0.0032707	-0.536769	-8.22936	1.88217e-16	1.05251e-15	-0.865181	-12.8551	8.05552e-38	4.3044e-37	-0.667197	-10.2316	1.43182e-24	7.80434e-24	10.163	10.02	9.80623	9.59573	9.72041	67861	Akr1b10	1	0.905626	0.780888	0.674875	0.735793	67861	Akr1b10	45.2772	31.6665	19.9038	13.7978
11677	Akr1b3	0.184407	0.0414162	0.0995626	-0.0772162	0.399172	0.498877	-0.313805	0.000864513	0.00194543	-0.155152	0.10355	0.175016	11677	Akr1b3	0.184407	2.03934	0.041416	0.0995622	0.107191	1.17456	0.240169	0.39072	-0.206614	-2.21993	0.0264232	0.0384435	-0.361766	-3.91491	9.04379e-05	0.000197623	9.33698	9.45462	9.40584	9.20371	9.10432	11677	Akr1b3	0.921696	1	0.966754	0.840366	0.784418	11677	Akr1b3	21.8439	17.751	16.655	10.6339
14187	Akr1b8	0.0385358	0.606542	0.746526	-0.289912	0.000133413	0.000347446	-0.866627	7.56214e-28	7.9183e-27	-0.105527	0.193011	0.294594	14187	Akr1b8	0.0385359	0.515017	0.606541	0.746528	-0.251376	-3.32612	0.000880649	0.00220813	-1.118	-14.2953	2.34092e-46	1.47436e-45	-1.22353	-15.7869	3.8276e-56	4.2032e-55	10.638	10.6632	10.4682	9.90999	9.84254	14187	Akr1b8	0.982723	1	0.873594	0.593296	0.566196	14187	Akr1b8	60.9096	48.2596	33.8061	15.3122
622402	Akr1c12	0.0952578	0.524784	0.679111	-0.0382688	0.804446	0.855691	-0.773744	6.59461e-06	1.91683e-05	0.224934	0.202416	0.305931	622402	Akr1c12	0.095258	0.63599	0.524783	0.67911	0.0569892	0.373565	0.708728	0.922101	-0.716755	-4.28141	1.85713e-05	3.59547e-05	-0.491821	-3.11436	0.00184344	0.00348839	6.67072	6.72719	6.70268	6.22524	6.35533	622402	Akr1c12	0.961615	1	0.983155	0.706154	0.772789	622402	Akr1c12	4.44976	3.67843	3.38525	1.35169
27384	Akr1c13	0.0984745	0.361333	0.528392	-0.271679	0.012928	0.0248917	-0.467828	3.13053e-05	8.46166e-05	0.29544	0.00861249	0.0197305	27384	Akr1c13	0.0984747	0.912829	0.361332	0.528391	-0.173204	-1.59006	0.111821	0.199175	-0.641033	-5.77607	7.64677e-09	1.78048e-08	-0.345593	-3.16949	0.00152706	0.00292027	9.59737	9.65967	9.47858	9.18817	9.37203	27384	Akr1c13	0.957738	1	0.882036	0.721213	0.819243	27384	Akr1c13	31.3829	25.3229	21.8884	10.9668
56043	Akr1e1	0.082252	0.227859	0.378481	-0.482051	1.58399e-11	7.39509e-11	-0.360489	2.84568e-06	8.5501e-06	0.430011	1.64684e-08	8.56582e-08	56043	Akr1e1	0.082252	1.20589	0.227859	0.37848	-0.399799	-5.64018	1.69868e-08	6.35475e-08	-0.760288	-10.2829	8.41206e-25	3.35252e-24	-0.330276	-4.71934	2.3661e-06	5.90358e-06	9.50544	9.56045	9.24242	9.01452	9.28504	56043	Akr1e1	0.962585	1	0.802161	0.684946	0.826212	56043	Akr1e1	21.5533	17.1301	11.5403	7.30457
110198	Akr7a5	-0.0128697	0.9201	0.955985	-0.677197	2.55824e-07	8.86992e-07	-1.44403	1.52737e-23	1.32965e-22	0.106087	0.481111	0.604863	110198	Akr7a5	-0.0128695	-0.100307	0.920101	0.953077	-0.690067	-5.2751	1.32685e-07	4.67804e-07	-2.1341	-15.0724	2.46136e-51	1.69211e-50	-2.02801	-14.7361	3.7796e-49	3.61689e-48	9.04519	9.02969	8.57218	7.68068	7.73834	110198	Akr7a5	1	0.989311	0.720458	0.388365	0.404203	110198	Akr7a5	16.3817	11.8993	8.06665	2.44339
11651	Akt1	-0.0683523	0.43209	0.597491	-0.012933	0.882104	0.913787	-0.279602	0.0013976	0.00305185	0.149941	0.0866178	0.150791	11651	Akt1	-0.0683521	-0.785618	0.432091	0.59749	-0.0812851	-0.933342	0.350643	0.538112	-0.360888	-4.13356	3.57179e-05	6.76918e-05	-0.210947	-2.42226	0.0154245	0.0257414	12.4991	12.4523	12.4422	12.2612	12.359	11651	Akt1	1	0.968098	0.961359	0.848016	0.907456	11651	Akt1	108.889	83.4638	59.6619	46.3796
67605	Akt1s1	-0.160288	0.0988177	0.197868	-0.552532	2.66741e-08	1.00474e-07	0.548768	4.16936e-08	1.47161e-07	0.621064	2.16042e-10	1.33765e-09	67605	Akt1s1	-0.160288	-1.65061	0.098818	0.197869	-0.712819	-7.22151	5.14136e-13	2.48867e-12	-0.164051	-1.67639	0.0936624	0.124324	0.457012	4.74014	2.13569e-06	5.34572e-06	10.2262	10.1185	9.76805	10.1191	10.5335	67605	Akt1s1	0.808186	0.750042	0.588275	0.750333	1	67605	Akt1s1	27.9148	19.324	13.1392	15.7198
11652	Akt2	0.111967	0.0476312	0.111375	0.516395	5.51261e-20	3.9709e-19	0.160523	0.00414605	0.00836458	-0.75744	1.27181e-40	4.55176e-39	11652	Akt2	0.111967	1.98065	0.0476311	0.111374	0.628362	11.2061	3.80516e-29	3.3698e-28	0.788885	14.0597	6.71949e-45	4.12065e-44	0.0314445	0.55322	0.580113	0.660909	10.7515	10.8227	11.1607	11.267	10.7715	11652	Akt2	0.699558	0.734961	0.929015	1	0.709358	11652	Akt2	22.63	19.417	23.3992	21.3369
23797	Akt3	0.110361	0.429154	0.594644	0.401294	0.00405389	0.00857777	2.44174	2.56966e-70	9.31488e-69	-1.47515	3.55445e-27	6.90076e-26	23797	Akt3	0.110361	0.790642	0.429153	0.594642	0.511655	3.67281	0.000239896	0.000640088	2.95339	21.4498	4.58427e-102	5.92783e-101	1.47824	10.6956	1.06759e-26	6.22541e-26	9.86807	9.92859	10.1714	11.8433	10.8026	23797	Akt3	0.254329	0.265224	0.313828	1	0.486091	23797	Akt3	8.5261	6.89751	5.44785	28.0917
14339	Aktip	-0.33842	1.80894e-05	9.74997e-05	-0.084356	0.301274	0.398699	-0.154546	0.0658901	0.105071	0.277972	0.000831561	0.00234281	14339	Aktip	-0.33842	-4.28725	1.80895e-05	9.75001e-05	-0.422776	-5.28492	1.25762e-07	4.44185e-07	-0.577322	-7.08878	1.35295e-12	3.7281e-12	-0.29935	-3.78451	0.000154011	0.00032864	9.64429	9.42082	9.36807	9.26872	9.44794	14339	Aktip	1	0.856502	0.825752	0.770797	0.872755	14339	Aktip	17.1685	11.034	9.43322	7.31666
17025	Alad	0.0213102	0.85274	0.914585	-0.656713	4.09736e-08	1.52002e-07	-1.38367	2.1633e-23	1.87494e-22	0.739047	1.91872e-07	8.90906e-07	17025	Alad	0.0213104	0.185625	0.852738	0.912157	-0.635403	-5.34775	8.9054e-08	3.17986e-07	-2.01907	-14.9929	8.16814e-51	5.56299e-50	-1.28003	-10.4549	1.39144e-25	7.81734e-25	8.49415	8.50756	8.065	7.22557	7.65676	17025	Alad	0.990748	1	0.735825	0.411226	0.554477	17025	Alad	13.7007	10.802	6.93902	2.19392
11655	Alas1	0.466889	6.82488e-07	4.46385e-06	0.608139	8.97571e-11	3.99554e-10	0.804157	7.83065e-18	5.11485e-17	-0.0485926	0.602336	0.711983	11655	Alas1	0.466889	4.96628	6.82482e-07	4.46381e-06	1.07503	11.453	2.27171e-30	2.08025e-29	1.87919	20.0563	1.779e-89	2.04242e-88	1.83059	19.5491	4.2022e-85	7.23834e-84	11.949	12.2312	12.6196	13.1637	13.1248	11655	Alas1	0.430856	0.523965	0.68581	1	0.973435	11655	Alas1	47.3115	52.5451	67.5417	100.07
11658	Alcam	0.160537	0.0308857	0.0782124	0.641106	6.33873e-18	4.1716e-17	0.363137	9.86352e-07	3.09203e-06	-1.06695	9.89657e-47	4.55242e-45	11658	Alcam	0.160537	2.15854	0.0308856	0.0782121	0.801643	10.7921	3.75112e-27	3.12399e-26	1.16478	15.6877	1.83545e-55	1.34955e-54	0.0978349	1.31481	0.188575	0.25354	13.1389	13.235	13.6525	13.8929	13.198	11658	Alcam	0.592987	0.63384	0.846543	1	0.617772	11658	Alcam	81.4527	78.4274	87.9786	91.9505
69748	Aldh16a1	-0.00191078	0.983545	0.99451	-0.276601	0.00305871	0.00661835	-0.360221	0.000141756	0.000353905	0.0117692	0.901336	0.935274	69748	Aldh16a1	-0.00191063	-0.0206237	0.983546	0.991564	-0.278512	-2.99007	0.00278915	0.00656781	-0.638733	-6.80003	1.04598e-11	2.77656e-11	-0.626964	-6.71161	1.92493e-11	6.50874e-11	10.9706	10.966	10.7843	10.5529	10.5591	69748	Aldh16a1	1	0.996802	0.878868	0.748591	0.751825	69748	Aldh16a1	36.2066	27.7793	22.2445	14.1956
56454	Aldh18a1	-0.180382	0.31885	0.48449	-0.00367422	0.98396	0.988621	-0.583147	0.00176861	0.00379652	1.27226	5.47433e-12	3.94245e-11	56454	Aldh18a1	-0.180381	-0.996822	0.318851	0.484492	-0.184055	-1.01344	0.310852	0.487027	-0.767202	-4.1526	3.28717e-05	6.24819e-05	0.505055	2.81166	0.00492867	0.00882034	8.5677	8.44569	8.43632	8.0777	8.90138	56454	Aldh18a1	0.793505	0.72916	0.724441	0.564998	1	56454	Aldh18a1	5.72819	4.04363	2.23611	1.37756
72535	Aldh1b1	-0.506529	4.5113e-07	3.01238e-06	2.07227	2.35569e-103	9.78174e-102	2.78697	3.41044e-269	4.46085e-266	-1.14151	1.8686e-51	1.04301e-49	72535	Aldh1b1	-0.506528	-5.046	4.51147e-07	3.0125e-06	1.56574	17.6286	1.4856e-69	2.89619e-68	4.35271	51.3549	0	0	3.21121	37.6094	0	0	8.57943	8.3228	9.49459	11.4586	10.6153	72535	Aldh1b1	0.135922	0.113772	0.256318	1	0.557369	72535	Aldh1b1	4.21824	2.52464	8.2285	45.7688
107747	Aldh1l1	-0.0223255	0.779937	0.869982	0.0823748	0.312439	0.410655	1.13982	7.93967e-47	1.54425e-45	0.0929663	0.219236	0.326361	107747	Aldh1l1	-0.0223254	-0.2794	0.779938	0.869984	0.0600494	0.746449	0.455396	0.665326	1.19987	15.4571	6.75798e-54	4.82332e-53	1.29283	16.822	1.68337e-63	2.0805e-62	9.38312	9.36827	9.42032	10.1734	10.2372	107747	Aldh1l1	0.553216	0.54755	0.567667	0.956748	1	107747	Aldh1l1	8.2695	6.23148	6.44354	11.3087
11669	Aldh2	0.0124192	0.874698	0.927818	-0.0497972	0.52777	0.622334	-0.277318	0.000451189	0.00105542	-0.409999	2.26086e-07	1.04187e-06	11669	Aldh2	0.0124193	0.157696	0.874697	0.925062	-0.0373779	-0.474265	0.635311	0.855566	-0.314696	-3.98662	6.702e-05	0.000124591	-0.724694	-9.17712	4.42792e-20	2.10945e-19	13.3627	13.3713	13.3359	13.1549	12.8935	11669	Aldh2	0.994031	1	0.975756	0.860663	0.718043	11669	Aldh2	215.22	171.02	127.039	96.1413
11671	Aldh3a2	-0.150686	0.116424	0.226002	-0.268544	0.00579013	0.0119221	-0.166662	0.0917475	0.140856	0.395543	5.65795e-05	0.000191575	11671	Aldh3a2	-0.150686	-1.56996	0.116424	0.226002	-0.41923	-4.33213	1.47674e-05	4.43983e-05	-0.585892	-6.00801	1.87816e-09	4.49891e-09	-0.190349	-1.9796	0.047749	0.0731666	10.3877	10.2842	10.1089	10.0025	10.2581	11671	Aldh3a2	1	0.930792	0.824313	0.765657	0.914076	11671	Aldh3a2	22.0618	16.421	10.0207	8.50298
67689	Aldh3b1	-0.0403948	0.617642	0.754653	-0.263642	0.00122576	0.00281939	-0.57374	4.55849e-12	2.14479e-11	0.582079	2.06194e-12	1.54073e-11	67689	Aldh3b1	-0.0403947	-0.499193	0.617643	0.754655	-0.304037	-3.73845	0.000185162	0.000499555	-0.877777	-10.6649	1.48514e-26	6.20499e-26	-0.295697	-3.64181	0.00027073	0.000563165	11.4665	11.4365	11.264	10.8984	11.27	67689	Aldh3b1	1	0.979422	0.869039	0.674475	0.872631	67689	Aldh3b1	71.0414	52.8982	42.5048	23.9235
212647	Aldh4a1	-0.208856	0.0364704	0.0899604	-0.664315	3.52532e-10	1.51267e-09	-0.177562	0.114973	0.172048	0.950242	1.93303e-18	2.21965e-17	212647	Aldh4a1	-0.208855	-2.09164	0.0364705	0.0899607	-0.873171	-8.37054	5.73543e-17	3.28121e-16	-1.05073	-9.82032	9.20477e-23	3.49594e-22	-0.100491	-1.00712	0.313876	0.395635	8.87855	8.73701	8.30587	8.19542	8.80788	212647	Aldh4a1	1	0.906552	0.67237	0.622814	0.952195	212647	Aldh4a1	7.4213	4.97359	2.87428	1.95406
104776	Aldh6a1	-0.422177	0.0368306	0.0906735	0.105381	0.608048	0.693599	0.574024	0.00495825	0.00989507	0.395561	0.0483821	0.0916997	104776	Aldh6a1	-0.422176	-2.08764	0.0368308	0.090674	-0.316796	-1.56226	0.118227	0.209396	0.257229	1.27956	0.2007	0.249621	0.652789	3.283	0.00102707	0.0020092	7.91816	7.63374	7.69533	8.08071	8.34141	104776	Aldh6a1	0.745745	0.612309	0.639015	0.834684	1	104776	Aldh6a1	3.68874	2.20577	1.2969	2.33725
110695	Aldh7a1	0.164486	0.0398734	0.096716	-0.179822	0.0287625	0.0513134	-0.332849	0.000122155	0.000307611	-0.200542	0.023642	0.0487675	110695	Aldh7a1	0.164486	2.05506	0.0398733	0.0967152	-0.0153355	-0.187702	0.85111	0.974041	-0.348185	-4.11753	3.82957e-05	7.24661e-05	-0.548727	-6.54766	5.84468e-11	1.92405e-10	8.96784	9.07685	8.95813	8.74001	8.61315	110695	Aldh7a1	0.927225	1	0.921011	0.791774	0.725126	110695	Aldh7a1	8.12788	6.62047	4.87694	3.30809
56752	Aldh9a1	-0.0620542	0.491715	0.651917	-0.366129	5.53872e-05	0.000151166	-1.2837	3.58487e-43	6.1428e-42	-0.571423	2.36512e-09	1.33244e-08	56752	Aldh9a1	-0.062054	-0.687581	0.491716	0.651916	-0.428183	-4.72427	2.30941e-06	7.43671e-06	-1.71188	-18.4792	3.03707e-76	2.93006e-75	-2.2833	-24.4926	1.77053e-132	5.31481e-131	11.5603	11.5153	11.2629	10.4387	10.1016	56752	Aldh9a1	1	0.969281	0.813703	0.459589	0.363829	56752	Aldh9a1	58.7715	46.4279	27.304	9.43263
11674	Aldoa	0.127759	0.0201349	0.0543387	-0.0943722	0.0863879	0.137433	0.0608215	0.269576	0.358673	0.363494	3.96208e-11	2.63416e-10	11674	Aldoa	0.127759	2.32383	0.0201348	0.0543385	0.033387	0.606864	0.543941	0.762933	0.0942084	1.71185	0.0869235	0.116136	0.457703	8.32874	8.17085e-17	3.48123e-16	14.7422	14.8246	14.763	14.8031	15.0432	11674	Aldoa	0.811738	0.859442	0.823521	0.846728	1	11674	Aldoa	637.672	544.144	457.199	398.904
11676	Aldoc	0.0580463	0.413005	0.579607	-0.174994	0.016931	0.0318225	-0.603419	2.432e-14	1.3163e-13	-0.385877	4.00733e-06	1.58739e-05	11676	Aldoc	0.0580463	0.818618	0.413004	0.579606	-0.116947	-1.61393	0.106542	0.190335	-0.720366	-9.36187	7.83396e-21	2.81816e-20	-1.10624	-14.2899	2.52863e-46	2.28927e-45	9.24773	9.28741	9.17081	8.77784	8.54011	11676	Aldoc	0.972868	1	0.922361	0.702432	0.595719	11676	Aldoc	16.6143	13.1558	10.1985	5.39652
208211	Alg1	0.0609442	0.376771	0.544213	-0.291191	4.49636e-05	0.000124033	0.127796	0.0811827	0.126376	0.25691	0.000332458	0.00100287	208211	Alg1	0.0609443	0.883863	0.37677	0.544212	-0.230247	-3.25675	0.00112695	0.00278489	-0.102451	-1.44424	0.148673	0.19012	0.154459	2.24035	0.025068	0.0403966	9.66499	9.70502	9.51538	9.59883	9.76754	208211	Alg1	0.931388	0.95759	0.839638	0.889641	1	208211	Alg1	21.839	18.3848	12.5308	11.5028
380959	Alg10b	-0.11328	0.616335	0.753534	0.10728	0.63653	0.717975	0.0290839	0.898294	0.92785	-0.0679916	0.764871	0.843263	380959	Alg10b	-0.113279	-0.501048	0.616337	0.753536	-0.00599901	-0.0265091	0.978851	0.98739	0.0230849	0.101871	0.918859	0.934883	-0.0449067	-0.198628	0.842554	0.882073	8.7223	8.63252	8.70162	8.74301	8.6836	380959	Alg10b	0.985749	0.926274	0.971721	1	0.959658	380959	Alg10b	7.74945	5.40512	2.66132	3.39303
207958	Alg11	-0.119237	0.151666	0.277763	0.736297	6.16814e-19	4.24442e-18	0.580331	1.05818e-13	5.52903e-13	-0.103247	0.171289	0.266837	207958	Alg11	-0.119237	-1.43367	0.151666	0.277764	0.61706	7.69707	1.39227e-14	7.15458e-14	1.19739	15.2673	1.26362e-52	8.84972e-52	1.09414	14.0925	4.22477e-45	3.71843e-44	8.52699	8.4545	8.92056	9.30875	9.2384	207958	Alg11	0.581659	0.553155	0.764086	1	0.95241	207958	Alg11	3.31043	2.32718	3.1082	4.06261
223774	Alg12	-0.386734	0.000596443	0.0024481	-0.170314	0.156096	0.229066	0.843258	1.03979e-12	5.11135e-12	0.482675	1.00249e-05	3.77298e-05	223774	Alg12	-0.386734	-3.43323	0.000596445	0.00244811	-0.557048	-4.80114	1.57765e-06	5.14546e-06	0.28621	2.58325	0.00978757	0.0150772	0.768885	7.20149	5.95575e-13	2.17523e-12	8.01211	7.76274	7.66223	8.19971	8.52666	223774	Alg12	0.700008	0.588894	0.549263	0.797219	1	223774	Alg12	5.9227	3.68784	2.55584	3.76622
67574	Alg13	0.178786	0.0428599	0.102185	-0.234198	0.0106179	0.0208063	-0.135941	0.159256	0.227741	0.154852	0.10537	0.177603	67574	Alg13	0.178786	2.02507	0.0428598	0.102185	-0.0554124	-0.609049	0.542492	0.761354	-0.191353	-2.04917	0.0404453	0.0572301	-0.0365012	-0.405679	0.684979	0.752548	8.35927	8.47623	8.32392	8.23595	8.33587	67574	Alg13	0.922133	1	0.899813	0.846585	0.907296	67574	Alg13	3.25629	2.88165	1.96181	1.35404
66789	Alg14	0.17144	0.121465	0.233304	-0.198005	0.0845698	0.134926	-0.198445	0.102239	0.154883	0.209259	0.0819496	0.143891	66789	Alg14	0.17144	1.54865	0.121465	0.233304	-0.0265653	-0.23328	0.815544	0.974041	-0.225011	-1.91379	0.0556465	0.0769441	-0.0157521	-0.139811	0.888809	0.915562	7.66364	7.77681	7.6474	7.52213	7.65266	66789	Alg14	0.92455	1	0.9142	0.838171	0.917545	66789	Alg14	10.7099	10.7356	7.60708	4.75407
56737	Alg2	-0.296154	0.00792308	0.0243462	-0.634566	6.44704e-08	2.35168e-07	0.107445	0.377642	0.474197	0.937169	1.08191e-15	1.02111e-14	56737	Alg2	-0.296154	-2.65533	0.00792311	0.0243463	-0.93072	-8.04737	8.45893e-16	4.60565e-15	-0.823275	-7.08768	1.36383e-12	3.75678e-12	0.113894	1.03075	0.302659	0.383246	8.87765	8.67947	8.2756	8.33886	8.95095	56737	Alg2	0.950459	0.828469	0.626181	0.654249	1	56737	Alg2	8.41786	5.40364	2.86342	2.76686
208624	Alg3	-0.201062	0.00584975	0.0186447	0.420161	1.89411e-08	7.2283e-08	0.0547961	0.460827	0.55691	-0.0165379	0.821477	0.881914	208624	Alg3	-0.201062	-2.75609	0.00584977	0.0186448	0.219099	3.05773	0.00223018	0.00532292	0.273895	3.77778	0.000158231	0.000285854	0.257358	3.6447	0.000267701	0.000557075	8.58889	8.46023	8.72993	8.76746	8.75652	208624	Alg3	0.883579	0.808195	0.974325	1	0.992444	208624	Alg3	12.5054	8.63219	10.7308	8.12697
66248	Alg5	0.0693663	0.425952	0.591169	0.0600843	0.493284	0.590283	-0.434109	1.1216e-06	3.49298e-06	-0.103721	0.248477	0.361597	66248	Alg5	0.0693665	0.796139	0.425951	0.591168	0.129451	1.48155	0.138459	0.240998	-0.304658	-3.43883	0.00058424	0.00100919	-0.40838	-4.63497	3.5699e-06	8.78195e-06	10.3103	10.3538	10.3934	10.1133	10.0476	66248	Alg5	0.944033	0.972905	1	0.823505	0.786853	66248	Alg5	39.0512	31.9704	31.6539	18.4152
320438	Alg6	-0.110783	0.365094	0.531912	-0.294454	0.0202912	0.0375137	-1.09316	1.33199e-14	7.31522e-14	-0.461937	0.00289782	0.00735279	320438	Alg6	-0.110783	-0.9057	0.365095	0.531912	-0.405236	-3.2374	0.00120622	0.00296891	-1.49839	-10.8687	1.62477e-27	6.96396e-27	-1.96033	-14.0085	1.38366e-44	1.20621e-43	8.0598	7.97958	7.78356	7.08819	6.81848	320438	Alg6	1	0.945914	0.825741	0.509936	0.422985	320438	Alg6	5.77971	4.24788	2.3889	0.908373
381903	Alg8	-0.124565	0.122987	0.235725	-0.0484817	0.557721	0.649299	-0.336625	8.43238e-05	0.000216513	0.0129126	0.881018	0.920498	381903	Alg8	-0.124565	-1.54236	0.122987	0.235725	-0.173046	-2.12019	0.03399	0.0675443	-0.509671	-6.08585	1.15875e-09	2.80533e-09	-0.496759	-6.03563	1.5834e-09	4.81994e-09	9.53996	9.45441	9.42486	9.20358	9.21432	381903	Alg8	1	0.942424	0.923313	0.792025	0.79794	381903	Alg8	18.6197	15.0491	10.941	6.86515
102580	Alg9	0.138699	0.0664854	0.145302	0.46072	9.94247e-10	4.12195e-09	0.239944	0.00124035	0.00272669	0.0237027	0.745532	0.829223	102580	Alg9	0.138699	1.83514	0.0664852	0.145302	0.599419	8.02752	9.94599e-16	5.38576e-15	0.839363	11.2693	1.85945e-29	8.34363e-29	0.863066	11.756	6.57426e-32	4.34673e-31	9.09926	9.1853	9.48399	9.64178	9.66063	102580	Alg9	0.677662	0.719307	0.884766	0.987021	1	102580	Alg9	8.29692	6.46867	8.1575	7.94228
211064	Alkbh1	0.314267	0.00615208	0.0194907	1.0058	3.21344e-19	2.23871e-18	-0.785	3.87896e-12	1.83331e-11	-0.368273	0.00158964	0.00423775	211064	Alkbh1	0.314267	2.73957	0.00615205	0.0194906	1.32007	11.7657	5.86632e-32	5.61887e-31	0.535067	4.63084	3.64185e-06	7.38339e-06	0.166794	1.44084	0.149629	0.206089	8.32323	8.52281	9.19028	8.66057	8.42872	211064	Alkbh1	0.548268	0.629611	1	0.692693	0.589859	211064	Alkbh1	7.29999	7.00654	13.6417	4.83213
231642	Alkbh2	-0.582926	0.00529792	0.0170958	-1.4933	6.24619e-10	2.63054e-09	0.595419	0.0205954	0.0367056	1.38903	1.46382e-09	8.43278e-09	231642	Alkbh2	-0.582926	-2.78834	0.00529795	0.0170959	-2.07623	-8.78644	1.5438e-18	9.47964e-18	-1.48081	-6.52235	6.92124e-11	1.77283e-10	-0.0917729	-0.445495	0.655962	0.72806	6.81369	6.3916	5.54151	5.8718	6.74061	231642	Alkbh2	1	0.746345	0.414036	0.52055	0.950609	231642	Alkbh2	5.51072	2.24306	0.937803	1.34364
69113	Alkbh3	-0.0113246	0.86312	0.920573	0.318956	1.67414e-06	5.39906e-06	0.165876	0.012336	0.0229686	-0.202154	0.00215566	0.00560903	69113	Alkbh3	-0.0113245	-0.172403	0.863121	0.917953	0.307632	4.71222	2.45032e-06	7.87642e-06	0.473508	7.2433	4.37904e-13	1.22856e-12	0.271353	4.18196	2.89007e-05	6.60118e-05	9.26089	9.25329	9.46012	9.56842	9.43622	69113	Alkbh3	0.808025	0.80378	0.927685	1	0.912438	69113	Alkbh3	21.3531	16.9729	18.6329	15.3011
70852	Alkbh3os1	-1.45959	0.00156494	0.00582262	1.37986	0.00392436	0.0083329	0.505152	0.213577	0.293753	-0.599393	0.138353	0.22379	70852	Alkbh3os1	-1.45959	-3.16236	0.00156495	0.00582265	-0.0797248	-0.200548	0.841052	0.974041	0.425428	1.10181	0.270546	0.326708	-0.173966	-0.439465	0.660325	0.731668	3.58068	2.92539	3.54483	3.83883	3.50601	70852	Alkbh3os1	0.836162	0.53092	0.815642	1	0.793986	70852	Alkbh3os1	0.688437	0.138018	0.155536	0.27911
72041	Alkbh4	-1.1627	7.381e-28	1.76384e-26	0.872473	8.06914e-15	4.55423e-14	0.58811	5.62218e-09	2.13463e-08	-0.0159177	0.866867	0.910621	72041	Alkbh4	-1.1627	-10.9405	7.38104e-28	1.76385e-26	-0.290225	-2.96343	0.00304231	0.00712757	0.297885	3.16484	0.0015517	0.00259283	0.281968	3.07215	0.00212523	0.00399041	7.78635	7.06525	7.59824	7.98317	7.97448	72041	Alkbh4	0.872469	0.529272	0.765819	1	0.993994	72041	Alkbh4	5.85211	2.0802	3.49624	4.34912
268420	Alkbh5	0.324196	0.000541745	0.00224404	-0.527839	2.20212e-08	8.35496e-08	0.848279	2.54046e-19	1.79861e-18	0.339314	0.000283445	0.000863869	268420	Alkbh5	0.324196	3.45922	0.000541742	0.00224403	-0.203643	-2.15872	0.030872	0.0618251	0.644636	6.8744	6.2252e-12	1.66958e-11	0.98395	10.5325	6.11992e-26	3.47507e-25	11.2787	11.4874	11.1481	11.6982	11.9299	268420	Alkbh5	0.636725	0.73585	0.581649	0.851611	1	268420	Alkbh5	19.783	19.9607	9.35168	17.1833
[truncated: 12,720 more rows]
[truncated: 36 more columns]
