# Supplementary material for: Macrophage inflammation resolution requires CPEB4-directed offsetting of mRNA degradation
Source: eLife. 2022 Apr 20;11:e75873. doi: 10.7554/eLife.75873 (PMC9094754; doi:10.7554/eLife.75873)
Supplement: Supplementary file 6. — ARE- and CPE-containing mRNAs were defined as all mRNAs regulated by CPEB4, tristetraprolin (TTP), or Hu-antigen R (HuR) in lipopolysaccharide (LPS)-stimulated bone marrow-derived macrophages (BMDMs) (see also Supplementary files 2 and 4). [file elife-75873-supp6.xlsx]

## Sheet: ARE and CPE containing mRNAs
symbol	Ares	CPES	ARE/CPE score	9h LPS (FC to max)	Category			Definitions
Nrp1	1	11	-3.45943	0.268627	Downregulated			ARE- and CPE-containing mRNAs. CPEB4 targets in BMDMs stimulated for 9 h with LPS (Table S2) and TTP/HuR targets from Sedlyarov et al, Mol Systems Biol 2016 (Table S4). For each transcript, the longest 3'UTR was considered.
Sdc4	1	10	-3.32193	0.272634	Downregulated			AREs calculation. The number of AREs is calculated by scanning the corresponding 3'UTR and counting the number of occurrences of the ARE motif (ATTTA) and overlapping versions (ATTTATTTA) up to 5 overlapping motifs. Note that k overlapping motifs count as k ARE motif.
Rnd1	1	9	-3.16993	0.0610567	Downregulated			CPEs calculation. The number of CPEs is calculated by scanning the corresponding 3'UTR and counting the number of occurrences of all the CPE motifs ('TTTTAT','TTTTAAT','TTTTAAAT','TTTTACT','TTTTCAT','TTTTAAGT','TTTTGT').
Rell1	2	16	-3	0.237471	Downregulated			ARE/CPE score. ARE/CPE score was calculated as the log2FC(number of AREs/number of CPEs). 3'UTRs with 0 AREs and 0 CPEs were named "No AREs or CPEs". 3'UTRs with only AREs were named AREd while 3'UTRs with only CPEs were named CPEd.
Tle3	1	8	-3	0.440994	Downregulated			9h LPS (FC to max). Wild type BMDMs were treated with LPS (10 ng/ml) for the indicated times and mRNA expression levels were quantified by RNASeq (n=4). For each mRNA, the expression values after 9 h of LPS exposure were normalized to its peak of expression. Based on the 9 h LPS value, mRNAs were classified as Sustained (>0,5) or Downregulated (<0,5). For figures 5I and S5G only mRNAs with more t…
Atxn1	7	43	-2.61891	0.343677	Downregulated
S1pr1	1	6	-2.58496	0.246624	Downregulated
Stat5a	1	6	-2.58496	0.272138	Downregulated
Rsad2	2	12	-2.58496	0.351951	Downregulated
Ccnd2	2	12	-2.58496	0.379129	Downregulated
Kcnj2	4	23	-2.52356	0.475605	Downregulated
Mctp1	2	11	-2.45943	0.440195	Downregulated
Mmd	2	10	-2.32193	0.152805	Downregulated
Uhrf1	2	10	-2.32193	0.29136	Downregulated
Sptssa	1	5	-2.32193	0.375024	Downregulated
Tnip3	3	15	-2.32193	0.436573	Downregulated
Xrn1	1	5	-2.32193	0.445485	Downregulated
Celf2	6	28	-2.22239	0.447603	Downregulated
Calcrl	5	22	-2.1375	0.389949	Downregulated
H2afv	1	4	-2	0.176743	Downregulated
Hmga2	3	12	-2	0.215293	Downregulated
Klf2	1	4	-2	0.37391	Downregulated
Tgfbr1	5	20	-2	0.405518	Downregulated
Gnpda1	1	4	-2	0.407256	Downregulated
Ikzf1	2	8	-2	0.411523	Downregulated
Gcsh	1	4	-2	0.420583	Downregulated
Nt5c3	1	4	-2	0.431604	Downregulated
March5	1	4	-2	0.433305	Downregulated
Cav2	3	12	-2	0.434298	Downregulated
Ifit1	1	4	-2	0.463223	Downregulated
Ndst1	1	4	-2	0.483959	Downregulated
Casp2	2	8	-2	0.487033	Downregulated
Slc30a4	6	22	-1.87447	0.251041	Downregulated
Cd44	6	22	-1.87447	0.335147	Downregulated
Ddhd1	4	14	-1.80735	0.330535	Downregulated
Lipa	2	7	-1.80735	0.47183	Downregulated
Pim1	2	7	-1.80735	0.480208	Downregulated
Zfhx3	11	38	-1.7885	0.411312	Downregulated
Rasa2	5	17	-1.76553	0.489479	Downregulated
Adgrl2	3	10	-1.73697	0.254352	Downregulated
Rhob	2	6	-1.58496	0.213776	Downregulated
Ankrd44	5	15	-1.58496	0.287857	Downregulated
Tlr3	4	12	-1.58496	0.374918	Downregulated
Pcgf5	1	3	-1.58496	0.402844	Downregulated
Siah1b	1	3	-1.58496	0.404383	Downregulated
Uap1	1	3	-1.58496	0.440146	Downregulated
Ier5	2	6	-1.58496	0.454751	Downregulated
Calm2	1	3	-1.58496	0.484347	Downregulated
Olr1	5	14	-1.48543	0.223065	Downregulated
Cdyl	4	11	-1.45943	0.443777	Downregulated
Kdm6b	3	8	-1.41504	0.117612	Downregulated
Sgk1	3	8	-1.41504	0.275728	Downregulated
Lrrc8b	7	18	-1.36257	0.426025	Downregulated
Plau	2	5	-1.32193	0.204609	Downregulated
Spry1	2	5	-1.32193	0.21268	Downregulated
Glul	2	5	-1.32193	0.293317	Downregulated
Sgk3	4	10	-1.32193	0.466075	Downregulated
Atp2b1	7	17	-1.28011	0.443801	Downregulated
Ppfibp1	3	7	-1.22239	0.308274	Downregulated
Rbl1	4	9	-1.16993	0.358531	Downregulated
Kctd12	10	22	-1.1375	0.33786	Downregulated
Cav1	5	11	-1.1375	0.389379	Downregulated
Atl2	5	11	-1.1375	0.482157	Downregulated
Cpeb4	16	35	-1.12928	0.387824	Downregulated
Rc3h1	20	43	-1.10434	0.482558	Downregulated
Gca	8	17	-1.08746	0.433893	Downregulated
Arrdc3	7	14	-1	0.172574	Downregulated
Tnfsf10	8	16	-1	0.284937	Downregulated
H2afx	1	2	-1	0.292659	Downregulated
Igfbp4	3	6	-1	0.320343	Downregulated
Sap30	1	2	-1	0.382044	Downregulated
Tmem67	1	2	-1	0.382183	Downregulated
Gbp5	2	4	-1	0.414809	Downregulated
Btg1	11	22	-1	0.420793	Downregulated
Pmp22	3	6	-1	0.422705	Downregulated
Sgms1	5	10	-1	0.430839	Downregulated
Crebl2	3	6	-1	0.446241	Downregulated
Man1a	6	12	-1	0.44661	Downregulated
Lrrfip1	5	10	-1	0.447683	Downregulated
Nfkbia	2	4	-1	0.45996	Downregulated
Lgals3	1	2	-1	0.463105	Downregulated
Metrnl	1	2	-1	0.464969	Downregulated
Ccl7	2	4	-1	0.47225	Downregulated
Tnfrsf21	2	4	-1	0.495006	Downregulated
Peli1	5	9	-0.847997	0.384826	Downregulated
Zfp36l2	5	9	-0.847997	0.415498	Downregulated
Csnk1e	4	7	-0.807355	0.412946	Downregulated
Sertad2	12	21	-0.807355	0.446414	Downregulated
Rin2	4	7	-0.807355	0.466972	Downregulated
Wwp1	7	12	-0.777608	0.291952	Downregulated
Arl5b	21	34	-0.695145	0.441169	Downregulated
Mad2l1	18	29	-0.688056	0.471307	Downregulated
Plxnc1	5	8	-0.678072	0.320996	Downregulated
Usp12	5	8	-0.678072	0.411727	Downregulated
Ap1s2	10	16	-0.678072	0.436045	Downregulated
Lif	7	11	-0.652077	0.0857312	Downregulated
Dcun1d3	7	11	-0.652077	0.457756	Downregulated
St8sia4	11	17	-0.628031	0.340079	Downregulated
Errfi1	4	6	-0.584963	0.0785736	Downregulated
Zfp36l1	8	12	-0.584963	0.0930226	Downregulated
Nfkbiz	4	6	-0.584963	0.131682	Downregulated
Cxcl10	2	3	-0.584963	0.221786	Downregulated
Cks2	2	3	-0.584963	0.229436	Downregulated
Cks1b	2	3	-0.584963	0.36708	Downregulated
Trim36	8	12	-0.584963	0.40271	Downregulated
Ccrl2	2	3	-0.584963	0.408243	Downregulated
Ifrd1	4	6	-0.584963	0.448157	Downregulated
Tcf4	4	6	-0.584963	0.457309	Downregulated
Slc20a2	2	3	-0.584963	0.475338	Downregulated
Mef2c	11	16	-0.540568	0.228057	Downregulated
Plod2	5	7	-0.485427	0.338976	Downregulated
Mob3b	8	11	-0.459432	0.280436	Downregulated
Skil	14	19	-0.440573	0.441648	Downregulated
Bcl2l11	6	8	-0.415037	0.194711	Downregulated
Zfp36	3	4	-0.415037	0.292721	Downregulated
Nos2	3	4	-0.415037	0.296117	Downregulated
Ivns1abp	6	8	-0.415037	0.308742	Downregulated
Smim14	3	4	-0.415037	0.368044	Downregulated
Dusp1	3	4	-0.415037	0.394924	Downregulated
Emp1	3	4	-0.415037	0.433212	Downregulated
Aff1	9	12	-0.415037	0.462757	Downregulated
Mafk	3	4	-0.415037	0.479339	Downregulated
Il1a	3	4	-0.415037	0.480651	Downregulated
Ppm1k	14	18	-0.36257	0.247468	Downregulated
Dr1	11	14	-0.347923	0.483275	Downregulated
Igf1r	13	16	-0.29956	0.247964	Downregulated
Gm6377	9	11	-0.289507	0.429165	Downregulated
Lipg	5	6	-0.263034	0.368859	Downregulated
Ncoa7	10	12	-0.263034	0.484887	Downregulated
Dennd1b	15	17	-0.180572	0.451279	Downregulated
Itgb8	20	22	-0.137504	0.343322	Downregulated
Rps6ka3	15	16	-0.0931094	0.495159	Downregulated
Ppp1r15a	1	1	0	0.189545	Downregulated
Serpine1	4	4	0	0.196539	Downregulated
Slc40a1	2	2	0	0.217434	Downregulated
Ccl4	2	2	0	0.249265	Downregulated
Fchsd2	8	8	0	0.264604	Downregulated
Btg2	5	5	0	0.266912	Downregulated
Etv3	7	7	0	0.277412	Downregulated
Junb	2	2	0	0.285599	Downregulated
Arhgef3	3	3	0	0.324593	Downregulated
Itgav	19	19	0	0.333417	Downregulated
Cdk6	2	2	0	0.351389	Downregulated
Mtss1	7	7	0	0.354292	Downregulated
Gadd45a	2	2	0	0.364758	Downregulated
Tpm1	5	5	0	0.410098	Downregulated
Ifit2	3	3	0	0.419014	Downregulated
Sema4c	2	2	0	0.440986	Downregulated
Fam3c	3	3	0	0.44774	Downregulated
St3gal6	3	3	0	0.449101	Downregulated
Fos	3	3	0	0.459387	Downregulated
Cd9	1	1	0	0.474237	Downregulated
Psmc3ip	2	2	0	0.478375	Downregulated
Plaur	2	2	0	0.480211	Downregulated
Epn2	6	6	0	0.483933	Downregulated
Spryd7	16	16	0	0.484082	Downregulated
Pam	2	2	0	0.485626	Downregulated
Fzd1	7	6	0.222392	0.407109	Downregulated
Ccng2	6	5	0.263034	0.348477	Downregulated
Slc4a7	22	18	0.289507	0.354005	Downregulated
Cxcl1	5	4	0.321928	0.0372637	Downregulated
Nlrp3	5	4	0.321928	0.366052	Downregulated
Csrnp1	4	3	0.415037	0.137908	Downregulated
N4bp2l1	4	3	0.415037	0.207751	Downregulated
Atp8b4	4	3	0.415037	0.439336	Downregulated
Cxcl2	7	5	0.485427	0.0823265	Downregulated
Tshz1	7	5	0.485427	0.391202	Downregulated
Dirc2	7	5	0.485427	0.45096	Downregulated
Clic5	7	5	0.485427	0.481499	Downregulated
Il6	6	4	0.584963	0.164221	Downregulated
Ptgs2	12	8	0.584963	0.216217	Downregulated
Edn1	3	2	0.584963	0.246192	Downregulated
Tiparp	9	6	0.584963	0.307962	Downregulated
Shisa3	11	7	0.652077	0.489878	Downregulated
Cxcl3	5	3	0.736966	0.129347	Downregulated
Pvr	5	3	0.736966	0.245674	Downregulated
Ccl3	5	3	0.736966	0.270621	Downregulated
Tnfaip3	5	3	0.736966	0.298664	Downregulated
Mrc1	5	3	0.736966	0.385572	Downregulated
Tnfsf9	2	1	1	0.0617048	Downregulated
Maff	4	2	1	0.128321	Downregulated
Dusp2	4	2	1	0.219589	Downregulated
Tnfaip2	2	1	1	0.259256	Downregulated
Cd69	2	1	1	0.281241	Downregulated
Smco4	2	1	1	0.321066	Downregulated
Irf1	2	1	1	0.342486	Downregulated
Aebp2	2	1	1	0.347702	Downregulated
Osm	6	3	1	0.462745	Downregulated
Calcoco1	2	1	1	0.463261	Downregulated
Ubtd2	2	1	1	0.473668	Downregulated
Dock2	2	1	1	0.492517	Downregulated
Cd40	7	3	1.22239	0.449472	Downregulated
Rasgef1b	5	2	1.32193	0.11346	Downregulated
Il12b	6	2	1.58496	0.225689	Downregulated
Ch25h	3	1	1.58496	0.255588	Downregulated
Cdkn1a	3	1	1.58496	0.277782	Downregulated
Icam1	4	1	2	0.316985	Downregulated
Il23a	5	1	2.32193	0.0761691	Downregulated
Ccl12	5	1	2.32193	0.325759	Downregulated
Pim3	5	1	2.32193	0.498612	Downregulated
Csf3	6	1	2.58496	0.404981	Downregulated
Cmpk2	7	1	2.80735	0.293022	Downregulated
Nfatc2ip	1	21	-4.39232	0.811098	Sustained
Tgs1	1	16	-4	0.705569	Sustained
B4galt5	1	15	-3.90689	0.539228	Sustained
Smg7	1	14	-3.80735	0.60016	Sustained
Alyref	1	14	-3.80735	0.688178	Sustained
Golph3	1	13	-3.70044	0.794088	Sustained
Isg20l2	1	12	-3.58496	0.849389	Sustained
Arid3a	1	12	-3.58496	1	Sustained
B4galt1	1	12	-3.58496	1	Sustained
Twf1	1	12	-3.58496	1	Sustained
Mex3c	1	11	-3.45943	0.759566	Sustained
Ube4b	1	11	-3.45943	1	Sustained
Zfp422	2	21	-3.39232	0.649532	Sustained
Eml4	1	10	-3.32193	0.757939	Sustained
Actb	1	10	-3.32193	0.905857	Sustained
Ugdh	1	10	-3.32193	1	Sustained
Tgfbr2	1	9	-3.16993	0.683027	Sustained
D030056L22Rik	1	9	-3.16993	0.699354	Sustained
Lsm14a	1	9	-3.16993	0.732092	Sustained
Limd1	1	9	-3.16993	0.756375	Sustained
Myo10	1	9	-3.16993	0.756915	Sustained
Pum1	1	9	-3.16993	0.793802	Sustained
Hnrnpk	1	9	-3.16993	0.827757	Sustained
Cisd2	1	9	-3.16993	1	Sustained
Cyb5r4	1	9	-3.16993	1	Sustained
Faf2	1	9	-3.16993	1	Sustained
Il6ra	1	9	-3.16993	1	Sustained
Vhl	1	9	-3.16993	1	Sustained
Zbed3	1	8	-3	0.507831	Sustained
Sav1	1	8	-3	0.542853	Sustained
Apobec3	1	8	-3	0.579639	Sustained
Irf2	1	8	-3	0.620249	Sustained
Ankrd10	1	8	-3	0.6515	Sustained
Atp8b2	1	8	-3	0.663796	Sustained
Kat6a	2	16	-3	0.685482	Sustained
Zdhhc5	1	8	-3	0.759296	Sustained
Phf2	1	8	-3	0.826499	Sustained
Hnrnpul1	1	8	-3	0.911121	Sustained
Dag1	1	8	-3	0.921998	Sustained
Setd5	1	8	-3	0.955227	Sustained
Khsrp	1	8	-3	0.961897	Sustained
Pbx2	1	8	-3	1	Sustained
Tomm34	1	8	-3	1	Sustained
Ubfd1	2	16	-3	1	Sustained
Kdelc2	2	14	-2.80735	0.504405	Sustained
Pnrc1	1	7	-2.80735	0.546505	Sustained
Rnf213	1	7	-2.80735	0.569008	Sustained
Trim30a	1	7	-2.80735	0.570545	Sustained
Cd81	1	7	-2.80735	0.575167	Sustained
Sco1	1	7	-2.80735	0.599021	Sustained
Samhd1	1	7	-2.80735	0.610082	Sustained
D16Ertd472e	1	7	-2.80735	0.729978	Sustained
Usp7	1	7	-2.80735	0.733643	Sustained
Zranb3	1	7	-2.80735	0.734592	Sustained
Pias1	1	7	-2.80735	0.739363	Sustained
Slc6a6	1	7	-2.80735	0.78065	Sustained
Adam17	1	7	-2.80735	0.818396	Sustained
Klhl7	1	7	-2.80735	0.874687	Sustained
Nip7	2	14	-2.80735	0.885981	Sustained
Lsm12	1	7	-2.80735	0.934409	Sustained
D230025D16Rik	1	7	-2.80735	1	Sustained
Rpia	1	7	-2.80735	1	Sustained
Tgds	1	7	-2.80735	1	Sustained
Vkorc1l1	1	7	-2.80735	1	Sustained
Dync1li2	3	20	-2.73697	1	Sustained
Arid4a	2	13	-2.70044	0.639138	Sustained
Nup153	2	13	-2.70044	0.703481	Sustained
Rwdd4a	2	13	-2.70044	0.939344	Sustained
Marcks	3	19	-2.66297	0.582251	Sustained
Rrs1	1	6	-2.58496	0.578855	Sustained
Seh1l	3	18	-2.58496	0.610464	Sustained
Dtx3l	2	12	-2.58496	0.615757	Sustained
Ube2d1	1	6	-2.58496	0.63236	Sustained
Btbd7	1	6	-2.58496	0.634096	Sustained
G3bp1	3	18	-2.58496	0.659162	Sustained
Lcp2	1	6	-2.58496	0.675473	Sustained
Ddx17	2	12	-2.58496	0.734207	Sustained
Maml1	2	12	-2.58496	0.742828	Sustained
Pold3	1	6	-2.58496	0.901483	Sustained
Atf1	2	12	-2.58496	0.917603	Sustained
Psme3	1	6	-2.58496	0.925477	Sustained
Nadk	1	6	-2.58496	0.927825	Sustained
Hcfc1	1	6	-2.58496	0.994916	Sustained
Ap3s1	1	6	-2.58496	0.998086	Sustained
Ergic1	1	6	-2.58496	1	Sustained
Ifnar1	1	6	-2.58496	1	Sustained
Nelfa	1	6	-2.58496	1	Sustained
Prex1	1	6	-2.58496	1	Sustained
Sde2	2	11	-2.45943	0.562259	Sustained
Tmod3	2	11	-2.45943	0.581716	Sustained
Glipr2	2	11	-2.45943	0.673756	Sustained
Wtap	2	11	-2.45943	0.802393	Sustained
Rap1a	2	11	-2.45943	0.886829	Sustained
Caap1	2	11	-2.45943	0.890514	Sustained
Erlin2	2	11	-2.45943	1	Sustained
Ldlrad3	3	16	-2.41504	0.581789	Sustained
Tceanc	3	16	-2.41504	0.914805	Sustained
Fmr1	4	20	-2.32193	0.517754	Sustained
Lnpep	4	20	-2.32193	0.529963	Sustained
Arl2bp	1	5	-2.32193	0.53934	Sustained
Fzd7	3	15	-2.32193	0.559139	Sustained
Nfyb	3	15	-2.32193	0.593075	Sustained
Parp12	1	5	-2.32193	0.605682	Sustained
Trim25	1	5	-2.32193	0.606096	Sustained
Plpp3	2	10	-2.32193	0.60686	Sustained
Mier1	3	15	-2.32193	0.619842	Sustained
Nudcd2	1	5	-2.32193	0.625911	Sustained
Prpsap2	1	5	-2.32193	0.633018	Sustained
Car13	1	5	-2.32193	0.662902	Sustained
Pros1	2	10	-2.32193	0.694157	Sustained
Ift80	1	5	-2.32193	0.702935	Sustained
Katnbl1	3	15	-2.32193	0.709254	Sustained
Pacs2	1	5	-2.32193	0.760541	Sustained
Sema4d	2	10	-2.32193	0.76681	Sustained
Fam168b	2	10	-2.32193	0.783667	Sustained
Mrfap1	1	5	-2.32193	0.79878	Sustained
Rbm15	2	10	-2.32193	0.806288	Sustained
Itm2b	1	5	-2.32193	0.815715	Sustained
Sumo2	1	5	-2.32193	0.839111	Sustained
Hnrnpul2	2	10	-2.32193	0.848356	Sustained
Bsdc1	1	5	-2.32193	0.887563	Sustained
Esyt2	4	20	-2.32193	0.912513	Sustained
Flcn	1	5	-2.32193	0.925047	Sustained
Setd2	1	5	-2.32193	0.933175	Sustained
Kdelr2	1	5	-2.32193	0.936013	Sustained
Spg21	1	5	-2.32193	0.939861	Sustained
Cab39	2	10	-2.32193	0.986401	Sustained
Msmo1	1	5	-2.32193	1	Sustained
Tmem41b	1	5	-2.32193	1	Sustained
Rbfox2	5	24	-2.26303	0.615286	Sustained
Tsn	4	19	-2.24793	0.867051	Sustained
Gabpb1	3	14	-2.22239	0.713613	Sustained
AI597479	3	14	-2.22239	0.890017	Sustained
Gsr	3	14	-2.22239	0.901591	Sustained
Adam10	3	14	-2.22239	0.922184	Sustained
Sec22b	3	14	-2.22239	0.949321	Sustained
Fbxl3	4	18	-2.16993	0.515116	Sustained
Nedd9	2	9	-2.16993	0.562954	Sustained
Psip1	2	9	-2.16993	0.568326	Sustained
Sh3rf1	2	9	-2.16993	0.658682	Sustained
Paxip1	2	9	-2.16993	0.725749	Sustained
Prmt6	2	9	-2.16993	0.747112	Sustained
Fbxo3	4	18	-2.16993	0.864709	Sustained
Rprd1b	2	9	-2.16993	0.955076	Sustained
Spast	4	18	-2.16993	0.996994	Sustained
Set	2	9	-2.16993	1	Sustained
Ppp1r15b	3	13	-2.11548	0.563876	Sustained
Rnf38	6	26	-2.11548	0.735585	Sustained
Dock4	3	13	-2.11548	0.928431	Sustained
Papola	3	13	-2.11548	0.964311	Sustained
Slain2	4	17	-2.08746	0.922027	Sustained
Edem1	5	21	-2.07039	0.84902	Sustained
Soat1	8	33	-2.04439	1	Sustained
B3gnt2	2	8	-2	0.501554	Sustained
Tle4	3	12	-2	0.512511	Sustained
Parp4	1	4	-2	0.513879	Sustained
Vezf1	4	16	-2	0.525185	Sustained
Sh3bgrl2	2	8	-2	0.547941	Sustained
Crebrf	1	4	-2	0.563889	Sustained
Slc19a2	2	8	-2	0.587676	Sustained
Max	1	4	-2	0.587706	Sustained
Coro2a	1	4	-2	0.592933	Sustained
Rhbdf2	1	4	-2	0.613937	Sustained
Rbms1	2	8	-2	0.635263	Sustained
Degs1	1	4	-2	0.649855	Sustained
Dnajb6	1	4	-2	0.650339	Sustained
Fut8	1	4	-2	0.679372	Sustained
Ilf3	1	4	-2	0.705363	Sustained
Vbp1	3	12	-2	0.706421	Sustained
Srsf5	1	4	-2	0.725833	Sustained
Dusp6	1	4	-2	0.726046	Sustained
Mylip	2	8	-2	0.74363	Sustained
Rcc2	1	4	-2	0.745593	Sustained
Zcchc14	4	16	-2	0.755441	Sustained
Reep3	6	24	-2	0.768963	Sustained
Mettl21a	1	4	-2	0.775167	Sustained
Lix1l	2	8	-2	0.796024	Sustained
Pde4a	1	4	-2	0.798681	Sustained
Kdelr1	1	4	-2	0.806646	Sustained
Lrrc57	2	8	-2	0.82368	Sustained
Ccny	3	12	-2	0.824369	Sustained
Sec22c	3	12	-2	0.825909	Sustained
Tnfrsf1b	2	8	-2	0.847159	Sustained
Celf1	5	20	-2	0.849696	Sustained
Son	2	8	-2	0.85089	Sustained
Tbpl1	1	4	-2	0.851441	Sustained
Mettl6	1	4	-2	0.86282	Sustained
Setd1b	2	8	-2	0.887641	Sustained
Trp53inp2	1	4	-2	0.892344	Sustained
Vps26a	4	16	-2	0.910421	Sustained
Zhx1	2	8	-2	0.915772	Sustained
Raf1	1	4	-2	0.915844	Sustained
Urb2	1	4	-2	0.924076	Sustained
Cyp51	3	12	-2	0.94422	Sustained
Med17	1	4	-2	0.950882	Sustained
Rpn1	1	4	-2	0.958732	Sustained
Vamp3	2	8	-2	0.960355	Sustained
Rabgap1	1	4	-2	0.965296	Sustained
Sirpa	1	4	-2	0.967438	Sustained
Erf	1	4	-2	0.974133	Sustained
Sp1	1	4	-2	0.984115	Sustained
Ddx42	2	8	-2	0.98649	Sustained
Ankrd27	1	4	-2	1	Sustained
Ccdc47	5	20	-2	1	Sustained
Crtc3	1	4	-2	1	Sustained
Dolpp1	1	4	-2	1	Sustained
Ern1	3	12	-2	1	Sustained
Hmox1	1	4	-2	1	Sustained
Impact	3	12	-2	1	Sustained
St13	2	8	-2	1	Sustained
Tmem101	1	4	-2	1	Sustained
Trim35	1	4	-2	1	Sustained
Usp21	1	4	-2	1	Sustained
Entpd7	6	23	-1.9386	1	Sustained
Tet2	4	15	-1.90689	0.511251	Sustained
Lemd3	4	15	-1.90689	0.608269	Sustained
Cd36	4	15	-1.90689	0.671773	Sustained
Ptprj	4	15	-1.90689	0.673065	Sustained
Cpsf2	4	15	-1.90689	0.694053	Sustained
Suz12	4	15	-1.90689	0.73521	Sustained
Pan3	4	15	-1.90689	0.89943	Sustained
Atp2c1	4	15	-1.90689	0.911283	Sustained
Ugcg	6	22	-1.87447	0.546407	Sustained
Srsf7	3	11	-1.87447	0.676865	Sustained
Gatad2a	3	11	-1.87447	0.746169	Sustained
Rap1b	3	11	-1.87447	0.755322	Sustained
Zbtb14	3	11	-1.87447	0.776178	Sustained
Ube2w	3	11	-1.87447	0.801452	Sustained
Apaf1	3	11	-1.87447	0.817789	Sustained
U2surp	9	33	-1.87447	0.826149	Sustained
Angel2	3	11	-1.87447	0.841071	Sustained
Tbcel	3	11	-1.87447	0.863487	Sustained
Dpysl2	3	11	-1.87447	0.955105	Sustained
Dyrk1a	5	18	-1.848	0.964127	Sustained
Notch2	4	14	-1.80735	0.501127	Sustained
Hacd2	4	14	-1.80735	0.556461	Sustained
Siah2	2	7	-1.80735	0.605326	Sustained
Lrrc8c	6	21	-1.80735	0.605905	Sustained
Mapk1ip1l	4	14	-1.80735	0.608001	Sustained
Slco3a1	2	7	-1.80735	0.633574	Sustained
Cpeb2	14	49	-1.80735	0.644713	Sustained
Bcl10	2	7	-1.80735	0.665405	Sustained
Hspa1b	2	7	-1.80735	0.666269	Sustained
Abcb10	2	7	-1.80735	0.674806	Sustained
Hmgxb4	4	14	-1.80735	0.679992	Sustained
Ythdc1	2	7	-1.80735	0.753254	Sustained
Glud1	2	7	-1.80735	0.78191	Sustained
Mcu	2	7	-1.80735	0.782156	Sustained
Lin52	2	7	-1.80735	0.80488	Sustained
Rnf6	2	7	-1.80735	0.830289	Sustained
Nt5dc1	2	7	-1.80735	0.836812	Sustained
Itgb1	2	7	-1.80735	0.876653	Sustained
Slc2a1	2	7	-1.80735	0.878379	Sustained
Sh3bgrl	4	14	-1.80735	0.878486	Sustained
Tpp2	2	7	-1.80735	0.892861	Sustained
Grb2	2	7	-1.80735	0.909795	Sustained
Rab31	2	7	-1.80735	1	Sustained
Slc7a8	2	7	-1.80735	1	Sustained
Atf2	5	17	-1.76553	0.753014	Sustained
Nup54	3	10	-1.73697	0.57385	Sustained
Stard13	3	10	-1.73697	0.604213	Sustained
Susd6	3	10	-1.73697	0.664856	Sustained
Tnks	3	10	-1.73697	0.692579	Sustained
BC005537	3	10	-1.73697	0.903844	Sustained
Gnb1	3	10	-1.73697	0.936823	Sustained
Fbxl14	3	10	-1.73697	0.991624	Sustained
Nlk	3	10	-1.73697	1	Sustained
Caprin1	7	23	-1.71621	0.758866	Sustained
Cbfb	4	13	-1.70044	0.710126	Sustained
Cpne1	4	13	-1.70044	0.87974	Sustained
Slc25a51	4	13	-1.70044	0.905712	Sustained
Leprotl1	4	13	-1.70044	1	Sustained
Zfp871	5	16	-1.67807	0.737582	Sustained
Wapl	5	16	-1.67807	0.85043	Sustained
Cdk13	6	19	-1.66297	0.826855	Sustained
Sec24a	7	22	-1.65208	0.865292	Sustained
Ccnd1	5	15	-1.58496	0.526346	Sustained
Rapgef2	4	12	-1.58496	0.541012	Sustained
Jund	1	3	-1.58496	0.542763	Sustained
Dpy19l1	2	6	-1.58496	0.566934	Sustained
Myadm	2	6	-1.58496	0.594364	Sustained
Rab21	2	6	-1.58496	0.596764	Sustained
Cdk2ap1	1	3	-1.58496	0.624368	Sustained
Stat5b	3	9	-1.58496	0.62625	Sustained
Nfe2l2	1	3	-1.58496	0.626289	Sustained
Poc1b	2	6	-1.58496	0.634961	Sustained
Marcksl1	1	3	-1.58496	0.642133	Sustained
Maf	4	12	-1.58496	0.642753	Sustained
Sp100	1	3	-1.58496	0.654701	Sustained
Fli1	4	12	-1.58496	0.657805	Sustained
Tbl1x	2	6	-1.58496	0.675183	Sustained
Hdac1	1	3	-1.58496	0.677941	Sustained
Zdhhc8	1	3	-1.58496	0.678819	Sustained
H3f3b	4	12	-1.58496	0.678931	Sustained
Zcchc3	2	6	-1.58496	0.679665	Sustained
Mapkapk2	1	3	-1.58496	0.67971	Sustained
Tmem171	1	3	-1.58496	0.686837	Sustained
Wls	1	3	-1.58496	0.690755	Sustained
Fbxo34	1	3	-1.58496	0.701322	Sustained
Ube2h	4	12	-1.58496	0.722005	Sustained
Cpped1	1	3	-1.58496	0.734854	Sustained
St3gal4	3	9	-1.58496	0.764121	Sustained
Ranbp1	1	3	-1.58496	0.768432	Sustained
Ythdf3	8	24	-1.58496	0.786931	Sustained
Sc5d	2	6	-1.58496	0.790913	Sustained
Tlr4	2	6	-1.58496	0.791485	Sustained
Actr3	2	6	-1.58496	0.797682	Sustained
Brd2	1	3	-1.58496	0.808516	Sustained
Tusc1	1	3	-1.58496	0.810807	Sustained
Coq10b	3	9	-1.58496	0.810919	Sustained
Ube2n	5	15	-1.58496	0.816951	Sustained
Klf13	3	9	-1.58496	0.821702	Sustained
Fundc1	2	6	-1.58496	0.828626	Sustained
Luc7l2	2	6	-1.58496	0.829772	Sustained
1110059E24Rik	1	3	-1.58496	0.860073	Sustained
Asah1	2	6	-1.58496	0.863742	Sustained
Ola1	1	3	-1.58496	0.874549	Sustained
Eif4a1	1	3	-1.58496	0.87664	Sustained
Tpm3	2	6	-1.58496	0.890134	Sustained
Syap1	1	3	-1.58496	0.899266	Sustained
Mrpl50	1	3	-1.58496	0.902662	Sustained
B2m	1	3	-1.58496	0.910044	Sustained
Fip1l1	4	12	-1.58496	0.913777	Sustained
Srebf2	2	6	-1.58496	0.913855	Sustained
Srek1	2	6	-1.58496	0.927259	Sustained
Tomm22	1	3	-1.58496	0.928855	Sustained
Fam118b	1	3	-1.58496	0.930284	Sustained
Slc6a8	1	3	-1.58496	0.931842	Sustained
Zfp518a	5	15	-1.58496	0.934799	Sustained
Urb1	1	3	-1.58496	0.939182	Sustained
Cpsf4	1	3	-1.58496	0.94223	Sustained
Zdhhc3	2	6	-1.58496	0.945401	Sustained
Dennd6a	8	24	-1.58496	0.946135	Sustained
Api5	2	6	-1.58496	0.950719	Sustained
Rab5c	1	3	-1.58496	0.958597	Sustained
Naif1	1	3	-1.58496	0.965699	Sustained
Tns3	2	6	-1.58496	0.974853	Sustained
Rac1	1	3	-1.58496	0.981504	Sustained
Sec61a1	1	3	-1.58496	0.982739	Sustained
Lman2	2	6	-1.58496	0.984216	Sustained
Ggh	2	6	-1.58496	0.987713	Sustained
Ptbp1	2	6	-1.58496	0.988164	Sustained
Tbc1d20	2	6	-1.58496	0.98847	Sustained
Calu	2	6	-1.58496	0.99134	Sustained
Surf4	2	6	-1.58496	0.996104	Sustained
Agpat5	11	33	-1.58496	1	Sustained
Atg5	2	6	-1.58496	1	Sustained
Capzb	1	3	-1.58496	1	Sustained
Cdc37l1	3	9	-1.58496	1	Sustained
Cinp	1	3	-1.58496	1	Sustained
Elk1	3	9	-1.58496	1	Sustained
Fam120a	2	6	-1.58496	1	Sustained
Fam45a	3	9	-1.58496	1	Sustained
Lasp1	1	3	-1.58496	1	Sustained
Mgat2	2	6	-1.58496	1	Sustained
Myh9	1	3	-1.58496	1	Sustained
Nfatc3	3	9	-1.58496	1	Sustained
Ovca2	1	3	-1.58496	1	Sustained
Rab14	5	15	-1.58496	1	Sustained
Rab32	2	6	-1.58496	1	Sustained
Rbpj	6	18	-1.58496	1	Sustained
Rnf130	1	3	-1.58496	1	Sustained
Srsf1	1	3	-1.58496	1	Sustained
Tmem230	1	3	-1.58496	1	Sustained
Tmem38b	5	15	-1.58496	1	Sustained
Tnpo1	11	32	-1.54057	1	Sustained
Klf6	7	20	-1.51457	0.54398	Sustained
Cep170	7	20	-1.51457	0.768796	Sustained
Nek7	7	20	-1.51457	0.789095	Sustained
Fam102b	6	17	-1.5025	0.816258	Sustained
Mzt1	5	14	-1.48543	0.742062	Sustained
Ccl9	5	14	-1.48543	0.810219	Sustained
Ccdc43	5	14	-1.48543	0.923342	Sustained
Zfand5	4	11	-1.45943	0.601548	Sustained
Pggt1b	4	11	-1.45943	0.669199	Sustained
Pofut1	4	11	-1.45943	0.81982	Sustained
Klhl9	4	11	-1.45943	0.828122	Sustained
Lpl	4	11	-1.45943	0.829417	Sustained
Fbxo28	4	11	-1.45943	0.850879	Sustained
Sh3pxd2b	4	11	-1.45943	0.988537	Sustained
Dbt	4	11	-1.45943	1	Sustained
Stt3a	7	19	-1.44057	0.946849	Sustained
Far1	10	27	-1.43296	0.623031	Sustained
Usp9x	10	27	-1.43296	0.663098	Sustained
Cbl	10	27	-1.43296	0.843771	Sustained
Nfxl1	3	8	-1.41504	0.596699	Sustained
Clint1	3	8	-1.41504	0.606943	Sustained
Zbtb44	21	56	-1.41504	0.650524	Sustained
Stk4	3	8	-1.41504	0.708822	Sustained
Dck	6	16	-1.41504	0.737447	Sustained
Tmem123	3	8	-1.41504	0.797935	Sustained
Tapt1	3	8	-1.41504	0.89127	Sustained
Nsun3	6	16	-1.41504	0.914182	Sustained
Klhl5	3	8	-1.41504	0.938467	Sustained
Rnf149	3	8	-1.41504	0.956112	Sustained
Gab1	3	8	-1.41504	1	Sustained
Shtn1	3	8	-1.41504	1	Sustained
Ammecr1	8	21	-1.39232	0.655427	Sustained
Picalm	8	21	-1.39232	0.741845	Sustained
Ccdc71l	8	21	-1.39232	0.811043	Sustained
Nucks1	13	34	-1.38702	0.588892	Sustained
Impad1	13	34	-1.38702	0.859964	Sustained
Etv6	5	13	-1.37851	0.562227	Sustained
Pkn2	5	13	-1.37851	0.665187	Sustained
Ptbp3	10	26	-1.37851	0.674952	Sustained
Mtf2	5	13	-1.37851	0.754214	Sustained
Cnot7	5	13	-1.37851	0.785864	Sustained
2510009E07Rik	5	13	-1.37851	0.813253	Sustained
Ywhaz	5	13	-1.37851	0.815168	Sustained
Mga	5	13	-1.37851	0.837049	Sustained
Gnpnat1	5	13	-1.37851	0.945122	Sustained
Zfp367	7	18	-1.36257	0.560797	Sustained
Uxs1	7	18	-1.36257	0.688931	Sustained
Ppp1r2	7	18	-1.36257	0.758515	Sustained
Ppig	9	23	-1.35364	0.900519	Sustained
Rlim	11	28	-1.34792	0.776929	Sustained
Ypel2	4	10	-1.32193	0.505129	Sustained
Cmtm6	4	10	-1.32193	0.515063	Sustained
Stat3	2	5	-1.32193	0.528457	Sustained
Jak2	2	5	-1.32193	0.562525	Sustained
Mob1b	16	40	-1.32193	0.573362	Sustained
Stk40	2	5	-1.32193	0.657992	Sustained
Spp1	2	5	-1.32193	0.680989	Sustained
Med1	4	10	-1.32193	0.696123	Sustained
Abcc1	2	5	-1.32193	0.706439	Sustained
Arsk	4	10	-1.32193	0.716392	Sustained
Mak16	2	5	-1.32193	0.721035	Sustained
Arid2	8	20	-1.32193	0.735173	Sustained
Qk	6	15	-1.32193	0.743583	Sustained
Furin	2	5	-1.32193	0.759384	Sustained
Rffl	2	5	-1.32193	0.792421	Sustained
Sephs1	4	10	-1.32193	0.823445	Sustained
Zdhhc18	2	5	-1.32193	0.854054	Sustained
Znrf2	10	25	-1.32193	0.856114	Sustained
Copb1	2	5	-1.32193	0.870982	Sustained
Arf3	2	5	-1.32193	0.880423	Sustained
Zmiz1	4	10	-1.32193	0.884879	Sustained
Taf2	4	10	-1.32193	0.887279	Sustained
Insig1	4	10	-1.32193	0.887394	Sustained
Diaph1	2	5	-1.32193	0.887601	Sustained
Bmi1	6	15	-1.32193	0.891074	Sustained
Pigm	10	25	-1.32193	0.896794	Sustained
Taf5l	2	5	-1.32193	0.907857	Sustained
Ube2j1	6	15	-1.32193	0.94061	Sustained
Sppl3	2	5	-1.32193	0.963311	Sustained
Pdia4	2	5	-1.32193	0.964544	Sustained
Mfap3	4	10	-1.32193	1	Sustained
Ppp1r3b	4	10	-1.32193	1	Sustained
Spred2	4	10	-1.32193	1	Sustained
Ybey	4	10	-1.32193	1	Sustained
Usp31	14	34	-1.28011	0.580646	Sustained
Mitf	7	17	-1.28011	0.700285	Sustained
Rbm47	7	17	-1.28011	0.798311	Sustained
Rnf111	7	17	-1.28011	0.84099	Sustained
Mxd1	5	12	-1.26303	0.539752	Sustained
Med13	10	24	-1.26303	0.628049	Sustained
Man2a1	5	12	-1.26303	0.677611	Sustained
Top1	5	12	-1.26303	0.731506	Sustained
Taf7	5	12	-1.26303	0.806714	Sustained
Slc35a5	5	12	-1.26303	0.870095	Sustained
Hnrnpd	10	24	-1.26303	0.904536	Sustained
Sbno1	10	24	-1.26303	0.905896	Sustained
Tgoln1	5	12	-1.26303	0.931934	Sustained
Mfsd14b	5	12	-1.26303	1	Sustained
Ccdc50	13	31	-1.25376	0.598638	Sustained
Lrp6	8	19	-1.24793	0.746322	Sustained
Sod2	8	19	-1.24793	0.973873	Sustained
Twsg1	6	14	-1.22239	0.557516	Sustained
Notch1	3	7	-1.22239	0.573788	Sustained
Rad21	3	7	-1.22239	0.64445	Sustained
Dcp1a	6	14	-1.22239	0.659719	Sustained
Tmem168	6	14	-1.22239	0.673105	Sustained
Txnrd1	3	7	-1.22239	0.701273	Sustained
Rcan3	3	7	-1.22239	0.729992	Sustained
Stk3	3	7	-1.22239	0.732519	Sustained
Rock2	9	21	-1.22239	0.754482	Sustained
Sipa1l3	3	7	-1.22239	0.77831	Sustained
Gas7	3	7	-1.22239	0.823557	Sustained
Ppp6r3	3	7	-1.22239	0.824654	Sustained
Naf1	3	7	-1.22239	0.833842	Sustained
Elavl1	12	28	-1.22239	0.850393	Sustained
Leprot	3	7	-1.22239	0.857061	Sustained
Akirin1	3	7	-1.22239	0.925216	Sustained
Dip2a	3	7	-1.22239	1	Sustained
Gclm	6	14	-1.22239	1	Sustained
Kdm2a	6	14	-1.22239	1	Sustained
Pag1	3	7	-1.22239	1	Sustained
Chic2	16	37	-1.20945	0.718663	Sustained
Atp13a3	10	23	-1.20163	0.533222	Sustained
Mapre1	10	23	-1.20163	0.853988	Sustained
Xpr1	7	16	-1.19265	0.546424	Sustained
Strn3	7	16	-1.19265	0.749931	Sustained
Nin	7	16	-1.19265	0.799399	Sustained
Scamp1	7	16	-1.19265	0.991303	Sustained
Gas2l3	11	25	-1.18442	0.616372	Sustained
Slc7a11	11	25	-1.18442	0.683732	Sustained
Mapk6	4	9	-1.16993	0.628977	Sustained
Eif4g2	4	9	-1.16993	0.754627	Sustained
Ing5	4	9	-1.16993	0.768257	Sustained
Hnrnpa0	4	9	-1.16993	0.794646	Sustained
Baz2a	4	9	-1.16993	0.811637	Sustained
Med14	8	18	-1.16993	0.832123	Sustained
Dph6	4	9	-1.16993	0.846024	Sustained
Ppp6c	8	18	-1.16993	0.858011	Sustained
Ythdf2	4	9	-1.16993	0.886254	Sustained
Kmt2e	4	9	-1.16993	0.901886	Sustained
Tram1	4	9	-1.16993	0.92557	Sustained
Tbc1d2b	4	9	-1.16993	0.960238	Sustained
Gmcl1	4	9	-1.16993	0.985594	Sustained
Cd38	4	9	-1.16993	1	Sustained
Zfx	13	29	-1.15754	0.859354	Sustained
Foxn2	9	20	-1.152	0.898411	Sustained
Pcmtd2	5	11	-1.1375	0.564283	Sustained
Usp3	5	11	-1.1375	0.930144	Sustained
Slc25a37	5	11	-1.1375	1	Sustained
Atxn3	11	24	-1.12553	0.623513	Sustained
Pik3ca	11	24	-1.12553	0.828946	Sustained
Acer3	18	39	-1.11548	0.536959	Sustained
Srek1ip1	6	13	-1.11548	0.833651	Sustained
Cpd	6	13	-1.11548	0.888179	Sustained
Exoc5	6	13	-1.11548	0.907088	Sustained
Lamc1	6	13	-1.11548	0.950029	Sustained
Kdm7a	18	39	-1.11548	1	Sustained
Thbs1	6	13	-1.11548	1	Sustained
Osbpl8	13	28	-1.10692	0.708101	Sustained
Tmx4	7	15	-1.09954	0.779736	Sustained
Fosl2	8	17	-1.08746	0.520724	Sustained
Serp1	8	17	-1.08746	0.872044	Sustained
Wasl	8	17	-1.08746	0.955649	Sustained
Usf3	9	19	-1.078	0.937173	Sustained
Fam76b	10	21	-1.07039	0.804941	Sustained
Ppp1cb	11	23	-1.06413	0.798305	Sustained
Med13l	1	2	-1	0.507195	Sustained
Csgalnact2	6	12	-1	0.50967	Sustained
Il10ra	2	4	-1	0.510387	Sustained
Mtmr14	1	2	-1	0.515672	Sustained
4932438A13Rik	2	4	-1	0.520256	Sustained
Tmem131	1	2	-1	0.524193	Sustained
Trp53	1	2	-1	0.526131	Sustained
Eid1	2	4	-1	0.529659	Sustained
Tor1aip2	5	10	-1	0.534923	Sustained
Tm6sf1	1	2	-1	0.539133	Sustained
Rap2c	7	14	-1	0.547634	Sustained
Ccl2	1	2	-1	0.573401	Sustained
P2rx7	3	6	-1	0.584741	Sustained
Prkx	4	8	-1	0.589031	Sustained
Gja1	4	8	-1	0.598345	Sustained
Kdm4a	2	4	-1	0.600535	Sustained
Cd200r4	3	6	-1	0.605293	Sustained
Syncrip	2	4	-1	0.607429	Sustained
Kbtbd2	3	6	-1	0.620799	Sustained
Snrpe	1	2	-1	0.625219	Sustained
Malt1	4	8	-1	0.62975	Sustained
Azi2	3	6	-1	0.646733	Sustained
Mob1a	3	6	-1	0.653517	Sustained
Gcc1	1	2	-1	0.654426	Sustained
Sertad3	1	2	-1	0.65966	Sustained
Rab5a	4	8	-1	0.659821	Sustained
Magohb	2	4	-1	0.66075	Sustained
Tm7sf3	5	10	-1	0.662822	Sustained
Col18a1	1	2	-1	0.664883	Sustained
Samd1	1	2	-1	0.669435	Sustained
Hdac2	2	4	-1	0.681691	Sustained
Sgms2	9	18	-1	0.68903	Sustained
Rdh10	4	8	-1	0.689994	Sustained
Ss18	2	4	-1	0.690314	Sustained
Gna13	9	18	-1	0.692751	Sustained
Usf2	1	2	-1	0.69629	Sustained
Lats1	2	4	-1	0.706556	Sustained
Cept1	2	4	-1	0.725442	Sustained
Hcfc2	2	4	-1	0.733587	Sustained
Hmgcr	5	10	-1	0.734498	Sustained
Wsb1	4	8	-1	0.737047	Sustained
Rbm7	3	6	-1	0.737895	Sustained
Brd3	5	10	-1	0.739948	Sustained
Nrp2	5	10	-1	0.741995	Sustained
Rnf166	2	4	-1	0.74653	Sustained
Zfand6	3	6	-1	0.746606	Sustained
Evl	1	2	-1	0.750261	Sustained
Lyrm1	1	2	-1	0.751304	Sustained
Cd47	8	16	-1	0.752849	Sustained
Klf10	4	8	-1	0.753414	Sustained
Rap2b	5	10	-1	0.754052	Sustained
Mospd1	4	8	-1	0.773075	Sustained
Igf2bp2	4	8	-1	0.773536	Sustained
Kctd13	1	2	-1	0.775285	Sustained
Rnf13	2	4	-1	0.776272	Sustained
Rbms2	5	10	-1	0.777198	Sustained
Akna	1	2	-1	0.783947	Sustained
Commd10	1	2	-1	0.78424	Sustained
Slc25a15	2	4	-1	0.784907	Sustained
Mbnl2	8	16	-1	0.790429	Sustained
Zbtb7a	5	10	-1	0.79094	Sustained
Sept2	6	12	-1	0.792044	Sustained
Stau1	1	2	-1	0.795127	Sustained
Siah1a	6	12	-1	0.799228	Sustained
Myl12b	1	2	-1	0.80178	Sustained
Smndc1	3	6	-1	0.805962	Sustained
Yaf2	4	8	-1	0.807704	Sustained
Irf9	1	2	-1	0.814103	Sustained
Terf2	1	2	-1	0.814353	Sustained
March1	1	2	-1	0.815329	Sustained
Bpnt1	6	12	-1	0.817488	Sustained
Sppl2a	9	18	-1	0.818424	Sustained
Ddx6	7	14	-1	0.825556	Sustained
Galnt1	4	8	-1	0.840246	Sustained
Fubp3	3	6	-1	0.842438	Sustained
Tmem201	1	2	-1	0.842438	Sustained
Dido1	4	8	-1	0.850698	Sustained
Slc25a16	4	8	-1	0.851256	Sustained
Gnai3	4	8	-1	0.855802	Sustained
Slc35a1	2	4	-1	0.859229	Sustained
Hdgf	1	2	-1	0.864469	Sustained
Cklf	1	2	-1	0.87046	Sustained
2510039O18Rik	2	4	-1	0.873092	Sustained
Rnf11	3	6	-1	0.874912	Sustained
Ncbp2	2	4	-1	0.885731	Sustained
Mynn	8	16	-1	0.890028	Sustained
Ppil4	4	8	-1	0.890503	Sustained
Tmed7	1	2	-1	0.890973	Sustained
Sp3	7	14	-1	0.893227	Sustained
Zswim6	5	10	-1	0.895359	Sustained
Zcchc8	4	8	-1	0.897148	Sustained
Hnrnpf	1	2	-1	0.898639	Sustained
Stx4a	1	2	-1	0.900257	Sustained
Slc12a6	3	6	-1	0.909573	Sustained
Tollip	4	8	-1	0.911827	Sustained
Msl1	2	4	-1	0.913027	Sustained
Tspan14	1	2	-1	0.91402	Sustained
Eif5a	1	2	-1	0.916728	Sustained
Tmem127	1	2	-1	0.921288	Sustained
Ubald2	2	4	-1	0.931788	Sustained
Ldah	1	2	-1	0.936781	Sustained
Srf	3	6	-1	0.940178	Sustained
Arpc5	3	6	-1	0.940397	Sustained
Bend6	2	4	-1	0.948287	Sustained
Zdhhc13	1	2	-1	0.951965	Sustained
Mtm1	7	14	-1	0.960469	Sustained
Vps72	1	2	-1	0.962418	Sustained
Hif1a	7	14	-1	0.976544	Sustained
Prdx1	3	6	-1	0.981293	Sustained
Tmem167b	2	4	-1	0.987653	Sustained
Bccip	1	2	-1	0.987825	Sustained
Canx	6	12	-1	0.995449	Sustained
Arrdc4	4	8	-1	1	Sustained
Calr	2	4	-1	1	Sustained
Cd300lf	2	4	-1	1	Sustained
Cd33	1	2	-1	1	Sustained
Eed	2	4	-1	1	Sustained
Egln1	3	6	-1	1	Sustained
Fbxo9	1	2	-1	1	Sustained
Gdpd1	2	4	-1	1	Sustained
Hspd1	1	2	-1	1	Sustained
Klra2	2	4	-1	1	Sustained
Kmt5a	1	2	-1	1	Sustained
Lpcat2	3	6	-1	1	Sustained
Paip1	1	2	-1	1	Sustained
Papss1	2	4	-1	1	Sustained
Rgs19	1	2	-1	1	Sustained
Tars	2	4	-1	1	Sustained
Thg1l	1	2	-1	1	Sustained
Tmco6	1	2	-1	1	Sustained
Trrap	2	4	-1	1	Sustained
Tvp23b	3	6	-1	1	Sustained
Upf1	1	2	-1	1	Sustained
Serbp1	35	68	-0.95818	0.810555	Sustained
Bbx	14	27	-0.947533	0.503318	Sustained
Mib1	14	27	-0.947533	0.82741	Sustained
Zc3h12c	12	23	-0.938599	0.5061	Sustained
Cyld	12	23	-0.938599	0.809009	Sustained
Uhmk1	11	21	-0.932886	0.794695	Sustained
Ikbkg	11	21	-0.932886	0.90773	Sustained
Thoc2	8	15	-0.906891	0.731196	Sustained
Sec62	8	15	-0.906891	0.804709	Sustained
Prpf40a	16	30	-0.906891	0.820597	Sustained
Iws1	24	45	-0.906891	0.921329	Sustained
Cdc73	30	56	-0.900464	0.712026	Sustained
Rnf24	7	13	-0.893085	0.596551	Sustained
Ssr3	7	13	-0.893085	0.690183	Sustained
Gk	7	13	-0.893085	0.718019	Sustained
Fbxo33	7	13	-0.893085	0.784841	Sustained
Cnot6	13	24	-0.884523	0.803486	Sustained
Desi2	13	24	-0.884523	1	Sustained
Marf1	6	11	-0.874469	0.61006	Sustained
Spred1	12	22	-0.874469	0.622928	Sustained
Cpox	6	11	-0.874469	0.717399	Sustained
Sash1	6	11	-0.874469	0.786202	Sustained
Ago2	18	33	-0.874469	0.898542	Sustained
E2f3	6	11	-0.874469	0.985574	Sustained
Lrrc58	22	40	-0.862496	0.81871	Sustained
Hnrnpu	11	20	-0.862496	0.972575	Sustained
Rsbn1	5	9	-0.847997	0.518687	Sustained
Tmtc2	5	9	-0.847997	0.553627	Sustained
4931406P16Rik	5	9	-0.847997	0.675013	Sustained
Zfp740	5	9	-0.847997	0.707997	Sustained
Abi1	5	9	-0.847997	0.714144	Sustained
Ccr5	5	9	-0.847997	0.715115	Sustained
Ncoa3	5	9	-0.847997	0.795029	Sustained
Abce1	5	9	-0.847997	0.809249	Sustained
Acvr1b	5	9	-0.847997	0.915632	Sustained
Smad5	5	9	-0.847997	0.939804	Sustained
Ankrd52	5	9	-0.847997	0.997994	Sustained
Alkbh5	5	9	-0.847997	1	Sustained
B4galt6	10	18	-0.847997	1	Sustained
Tmed2	5	9	-0.847997	1	Sustained
Pura	43	77	-0.840522	0.807325	Sustained
Zbtb41	19	34	-0.839535	0.902131	Sustained
Tmx3	14	25	-0.836501	0.794697	Sustained
Kat2b	9	16	-0.830075	0.588822	Sustained
Socs4	17	30	-0.819428	0.79946	Sustained
Pcgf3	16	28	-0.807355	0.671652	Sustained
Zeb2	8	14	-0.807355	0.673732	Sustained
Tob2	4	7	-0.807355	0.708387	Sustained
Chsy1	4	7	-0.807355	0.751189	Sustained
C3ar1	4	7	-0.807355	0.764848	Sustained
Ube2r2	4	7	-0.807355	0.86055	Sustained
Cybb	4	7	-0.807355	0.880533	Sustained
Chfr	4	7	-0.807355	0.885705	Sustained
Capza1	4	7	-0.807355	0.890911	Sustained
Rtf1	4	7	-0.807355	0.895328	Sustained
Cmip	4	7	-0.807355	0.946775	Sustained
Macf1	4	7	-0.807355	0.970758	Sustained
Rnmt	4	7	-0.807355	1	Sustained
Ube2q2	4	7	-0.807355	1	Sustained
Rab8b	11	19	-0.788496	0.660499	Sustained
Tmem106b	11	19	-0.788496	0.896046	Sustained
Pdzd8	11	19	-0.788496	1	Sustained
Plekhf2	7	12	-0.777608	0.582692	Sustained
Gpd2	7	12	-0.777608	0.670123	Sustained
Bmp2k	7	12	-0.777608	0.67558	Sustained
Snx18	7	12	-0.777608	0.826521	Sustained
Pafah1b1	7	12	-0.777608	0.861588	Sustained
Tmem87b	7	12	-0.777608	0.893577	Sustained
Cyb5b	7	12	-0.777608	1	Sustained
Jrkl	7	12	-0.777608	1	Sustained
Slc41a2	10	17	-0.765535	1	Sustained
Appbp2	13	22	-0.758992	0.778954	Sustained
Zbtb6	13	22	-0.758992	0.793317	Sustained
Pank3	16	27	-0.754888	0.855977	Sustained
Cd300lb	3	5	-0.736966	0.502169	Sustained
Id2	3	5	-0.736966	0.505047	Sustained
Prkacb	6	10	-0.736966	0.624589	Sustained
Mmp12	6	10	-0.736966	0.640802	Sustained
Chd1	6	10	-0.736966	0.64404	Sustained
Dram1	6	10	-0.736966	0.644446	Sustained
Lpcat1	3	5	-0.736966	0.667634	Sustained
Hpse	3	5	-0.736966	0.700233	Sustained
Rbm22	3	5	-0.736966	0.708274	Sustained
Epm2a	3	5	-0.736966	0.745818	Sustained
Cdk17	6	10	-0.736966	0.757402	Sustained
9530068E07Rik	3	5	-0.736966	0.794777	Sustained
Mtpn	9	15	-0.736966	0.802861	Sustained
Sar1a	3	5	-0.736966	0.812344	Sustained
Purb	18	30	-0.736966	0.840581	Sustained
Slc25a24	6	10	-0.736966	0.854899	Sustained
Pafah1b2	9	15	-0.736966	0.855614	Sustained
Ankrd40	3	5	-0.736966	0.861914	Sustained
Taf1	6	10	-0.736966	0.885584	Sustained
Pcbp2	6	10	-0.736966	0.91392	Sustained
Abca1	6	10	-0.736966	0.92356	Sustained
Tbp	3	5	-0.736966	0.934997	Sustained
Arl8a	3	5	-0.736966	0.962837	Sustained
Fam210a	18	30	-0.736966	1	Sustained
Pik3c2a	9	15	-0.736966	1	Sustained
Yy1	3	5	-0.736966	1	Sustained
Gtf2a1	14	23	-0.716207	0.600146	Sustained
Dpy19l4	14	23	-0.716207	0.648811	Sustained
Taok1	28	46	-0.716207	0.719799	Sustained
Larp4	11	18	-0.710493	0.949707	Sustained
Pdpk1	8	13	-0.70044	0.881032	Sustained
Magt1	8	13	-0.70044	0.905443	Sustained
Slx4ip	8	13	-0.70044	1	Sustained
Ube2k	13	21	-0.691878	0.963028	Sustained
Baz2b	5	8	-0.678072	0.533357	Sustained
Zfp217	5	8	-0.678072	0.551958	Sustained
Hs2st1	10	16	-0.678072	0.575506	Sustained
Dek	5	8	-0.678072	0.587724	Sustained
Fmnl2	5	8	-0.678072	0.59581	Sustained
Gtpbp10	5	8	-0.678072	0.619973	Sustained
Nipa2	5	8	-0.678072	0.699114	Sustained
Cnot6l	5	8	-0.678072	0.708189	Sustained
Heatr5a	5	8	-0.678072	0.758111	Sustained
Gosr1	5	8	-0.678072	0.764221	Sustained
Phtf2	5	8	-0.678072	0.787991	Sustained
Snap23	5	8	-0.678072	0.829921	Sustained
Pank2	5	8	-0.678072	0.902962	Sustained
Tnks2	10	16	-0.678072	0.939269	Sustained
Brd1	5	8	-0.678072	0.956941	Sustained
Klhl20	5	8	-0.678072	0.998442	Sustained
C330018D20Rik	5	8	-0.678072	1	Sustained
Dcp2	17	27	-0.667425	0.566763	Sustained
Ahr	7	11	-0.652077	0.53821	Sustained
Atad1	7	11	-0.652077	0.554377	Sustained
Alcam	7	11	-0.652077	0.617772	Sustained
2610001J05Rik	7	11	-0.652077	0.670462	Sustained
Atl3	14	22	-0.652077	0.708669	Sustained
Lrp12	7	11	-0.652077	0.787763	Sustained
Rbm33	7	11	-0.652077	0.814594	Sustained
Ipo8	7	11	-0.652077	0.882251	Sustained
Arf6	7	11	-0.652077	0.90777	Sustained
Nmt2	7	11	-0.652077	0.919136	Sustained
Nf1	7	11	-0.652077	0.979412	Sustained
Rab6a	7	11	-0.652077	1	Sustained
Phip	16	25	-0.643856	0.503903	Sustained
Clock	9	14	-0.63743	0.712346	Sustained
Ccnc	9	14	-0.63743	0.719529	Sustained
Pdik1l	9	14	-0.63743	0.898251	Sustained
Cflar	11	17	-0.628031	0.59181	Sustained
Suco	11	17	-0.628031	0.82836	Sustained
Sec63	11	17	-0.628031	0.883667	Sustained
Zfp654	11	17	-0.628031	0.922646	Sustained
Arih1	13	20	-0.621488	0.770023	Sustained
Itga4	15	23	-0.616671	0.522134	Sustained
Stam	15	23	-0.616671	0.824881	Sustained
Samsn1	2	3	-0.584963	0.501418	Sustained
Tpst1	2	3	-0.584963	0.505811	Sustained
Serinc3	4	6	-0.584963	0.580964	Sustained
Rab12	2	3	-0.584963	0.59892	Sustained
Cldnd1	4	6	-0.584963	0.601624	Sustained
Slc20a1	2	3	-0.584963	0.617147	Sustained
Naa50	6	9	-0.584963	0.617602	Sustained
C5ar1	2	3	-0.584963	0.617635	Sustained
Mknk2	2	3	-0.584963	0.617898	Sustained
Ets2	6	9	-0.584963	0.644106	Sustained
Stard5	4	6	-0.584963	0.658898	Sustained
Tacc1	10	15	-0.584963	0.664352	Sustained
Cdk12	2	3	-0.584963	0.669472	Sustained
Asph	8	12	-0.584963	0.682847	Sustained
Tpm4	2	3	-0.584963	0.686232	Sustained
Xiap	16	24	-0.584963	0.693512	Sustained
Tbc1d15	8	12	-0.584963	0.703167	Sustained
Runx1	14	21	-0.584963	0.741945	Sustained
Mapk8	4	6	-0.584963	0.741954	Sustained
Senp1	2	3	-0.584963	0.755051	Sustained
Stx7	4	6	-0.584963	0.755852	Sustained
Kin	2	3	-0.584963	0.757678	Sustained
Herpud2	2	3	-0.584963	0.761364	Sustained
Ap4e1	4	6	-0.584963	0.771548	Sustained
Tmem87a	4	6	-0.584963	0.773752	Sustained
Rab33b	6	9	-0.584963	0.778374	Sustained
Tbc1d13	2	3	-0.584963	0.808823	Sustained
Mfsd14a	4	6	-0.584963	0.817466	Sustained
Shoc2	8	12	-0.584963	0.822804	Sustained
Tsr2	4	6	-0.584963	0.825104	Sustained
Rab10	6	9	-0.584963	0.830782	Sustained
Anxa4	2	3	-0.584963	0.835863	Sustained
Prkci	8	12	-0.584963	0.840044	Sustained
Dnajc8	2	3	-0.584963	0.840069	Sustained
Skp1a	2	3	-0.584963	0.847025	Sustained
Ap2b1	2	3	-0.584963	0.85339	Sustained
Taf8	2	3	-0.584963	0.884725	Sustained
Cdkn2aipnl	4	6	-0.584963	0.898399	Sustained
Akt1	2	3	-0.584963	0.907456	Sustained
Btbd1	4	6	-0.584963	0.914125	Sustained
Msn	6	9	-0.584963	0.914605	Sustained
Cdc42	2	3	-0.584963	0.925067	Sustained
Ensa	2	3	-0.584963	0.941384	Sustained
Cdc42se2	6	9	-0.584963	0.944057	Sustained
Ndufaf4	8	12	-0.584963	0.962152	Sustained
Tmed4	2	3	-0.584963	0.966956	Sustained
Nfya	4	6	-0.584963	0.967441	Sustained
Wipf1	8	12	-0.584963	0.969815	Sustained
1110004F10Rik	2	3	-0.584963	0.970095	Sustained
Pdcd6	2	3	-0.584963	0.977128	Sustained
Pex11a	2	3	-0.584963	0.989858	Sustained
Gtf2h3	2	3	-0.584963	0.992314	Sustained
Atxn7l3	2	3	-0.584963	1	Sustained
Ccdc127	14	21	-0.584963	1	Sustained
Fam49b	4	6	-0.584963	1	Sustained
Fnta	2	3	-0.584963	1	Sustained
Lamtor3	2	3	-0.584963	1	Sustained
Lmo4	2	3	-0.584963	1	Sustained
Mafg	4	6	-0.584963	1	Sustained
Mlx	2	3	-0.584963	1	Sustained
Fyttd1	13	19	-0.547488	0.801345	Sustained
Naa30	11	16	-0.540568	0.835044	Sustained
Phf6	9	13	-0.530515	0.515585	Sustained
Hus1	9	13	-0.530515	0.821084	Sustained
Ssr1	9	13	-0.530515	0.955337	Sustained
Itpripl2	7	10	-0.514573	0.770859	Sustained
Yipf4	7	10	-0.514573	0.836652	Sustained
Epc2	7	10	-0.514573	0.837344	Sustained
Zmpste24	7	10	-0.514573	0.91126	Sustained
0610010F05Rik	7	10	-0.514573	0.912468	Sustained
Tm9sf3	12	17	-0.5025	0.937801	Sustained
Nudt4	5	7	-0.485427	0.566309	Sustained
Tab2	5	7	-0.485427	0.586708	Sustained
Tnfrsf11a	5	7	-0.485427	0.587623	Sustained
Arpp19	10	14	-0.485427	0.59362	Sustained
Tfrc	5	7	-0.485427	0.619242	Sustained
Sgpp1	5	7	-0.485427	0.638884	Sustained
Ep300	5	7	-0.485427	0.758644	Sustained
Ddx21	5	7	-0.485427	0.806656	Sustained
Tmem30a	5	7	-0.485427	0.814227	Sustained
Lin54	10	14	-0.485427	0.951341	Sustained
Elk3	5	7	-0.485427	0.955599	Sustained
Sypl	10	14	-0.485427	0.97341	Sustained
Ube2a	5	7	-0.485427	0.994634	Sustained
Abhd13	10	14	-0.485427	0.995518	Sustained
Clec4e	5	7	-0.485427	1	Sustained
Rprd1a	5	7	-0.485427	1	Sustained
Smim15	5	7	-0.485427	1	Sustained
Xpot	5	7	-0.485427	1	Sustained
Gnaq	13	18	-0.469485	0.663965	Sustained
Fnip1	13	18	-0.469485	0.773896	Sustained
Lpar1	8	11	-0.459432	0.555762	Sustained
Ikzf5	16	22	-0.459432	0.586413	Sustained
Csnk1g3	8	11	-0.459432	0.79061	Sustained
Actr2	8	11	-0.459432	0.811572	Sustained
Atp2a2	8	11	-0.459432	0.983699	Sustained
Zdhhc21	30	41	-0.450661	0.66076	Sustained
Dcbld2	11	15	-0.447459	0.597889	Sustained
Lin7c	14	19	-0.440573	0.648351	Sustained
Snx5	3	4	-0.415037	0.501988	Sustained
Parp14	3	4	-0.415037	0.581758	Sustained
Abhd17c	6	8	-0.415037	0.610501	Sustained
Rybp	15	20	-0.415037	0.612249	Sustained
Nampt	12	16	-0.415037	0.636002	Sustained
Cd200	3	4	-0.415037	0.649192	Sustained
Elf1	6	8	-0.415037	0.654536	Sustained
St18	6	8	-0.415037	0.666229	Sustained
Rnf2	9	12	-0.415037	0.679692	Sustained
Idi1	6	8	-0.415037	0.693087	Sustained
Rnf115	3	4	-0.415037	0.720178	Sustained
Spin1	9	12	-0.415037	0.729705	Sustained
Lpgat1	3	4	-0.415037	0.735163	Sustained
Trmt11	3	4	-0.415037	0.777056	Sustained
Coa5	3	4	-0.415037	0.802284	Sustained
Dcun1d1	15	20	-0.415037	0.805765	Sustained
Dvl2	3	4	-0.415037	0.824584	Sustained
Pom121	3	4	-0.415037	0.830143	Sustained
Nab1	6	8	-0.415037	0.843001	Sustained
Rcn2	6	8	-0.415037	0.849037	Sustained
Pign	9	12	-0.415037	0.874933	Sustained
App	3	4	-0.415037	0.881159	Sustained
Mllt11	6	8	-0.415037	0.895426	Sustained
Utp23	3	4	-0.415037	0.909533	Sustained
Eea1	12	16	-0.415037	0.911594	Sustained
R3hdm2	3	4	-0.415037	0.944263	Sustained
Acap2	12	16	-0.415037	0.945842	Sustained
Rhoa	3	4	-0.415037	0.952446	Sustained
Fam206a	3	4	-0.415037	0.956035	Sustained
Slc16a10	12	16	-0.415037	0.962044	Sustained
Lats2	6	8	-0.415037	1	Sustained
Prkaa1	16	21	-0.392317	0.962773	Sustained
Uba6	13	17	-0.387023	0.583491	Sustained
Lpp	26	34	-0.387023	0.805905	Sustained
Slc25a46	13	17	-0.387023	0.909675	Sustained
Sec23a	10	13	-0.378512	0.787106	Sustained
Acsl4	10	13	-0.378512	0.961371	Sustained
D1Ertd622e	7	9	-0.36257	0.518769	Sustained
Mtdh	7	9	-0.36257	0.73921	Sustained
Plekha3	7	9	-0.36257	0.762013	Sustained
Nxt2	7	9	-0.36257	0.788282	Sustained
Stx12	7	9	-0.36257	0.860567	Sustained
Pdcl	7	9	-0.36257	0.886932	Sustained
Smarcad1	7	9	-0.36257	0.921016	Sustained
Aph1b	7	9	-0.36257	0.960622	Sustained
Hook3	35	45	-0.36257	1	Sustained
Kif5b	11	14	-0.347923	0.717316	Sustained
Msl2	11	14	-0.347923	0.886329	Sustained
Plekha8	11	14	-0.347923	1	Sustained
Ppp3r1	11	14	-0.347923	1	Sustained
Arf4	4	5	-0.321928	0.557443	Sustained
Stim2	8	10	-0.321928	0.610181	Sustained
Tcf12	8	10	-0.321928	0.63417	Sustained
Fndc3b	8	10	-0.321928	0.655264	Sustained
Zfp111	4	5	-0.321928	0.660098	Sustained
Irak2	4	5	-0.321928	0.676571	Sustained
Cnep1r1	4	5	-0.321928	0.750416	Sustained
Hmgcs1	4	5	-0.321928	0.779248	Sustained
Sec22a	4	5	-0.321928	0.780076	Sustained
Krcc1	4	5	-0.321928	0.800846	Sustained
Zdhhc20	12	15	-0.321928	0.805452	Sustained
Dnajb9	4	5	-0.321928	0.831158	Sustained
Vps37a	16	20	-0.321928	0.838375	Sustained
Rab18	8	10	-0.321928	0.848246	Sustained
Becn1	8	10	-0.321928	0.867607	Sustained
Uba3	4	5	-0.321928	0.874503	Sustained
Pde8a	4	5	-0.321928	0.927764	Sustained
Ywhae	4	5	-0.321928	0.933962	Sustained
Cltc	4	5	-0.321928	0.937642	Sustained
Dnajc10	4	5	-0.321928	0.968295	Sustained
BC048403	4	5	-0.321928	1	Sustained
Golt1b	4	5	-0.321928	1	Sustained
Tmed5	13	16	-0.29956	0.763921	Sustained
Cggbp1	13	16	-0.29956	0.76874	Sustained
Klf7	18	22	-0.289507	0.688193	Sustained
Mob4	9	11	-0.289507	0.840763	Sustained
Hspa13	9	11	-0.289507	0.950309	Sustained
Rc3h2	14	17	-0.280108	0.679661	Sustained
Plagl2	5	6	-0.263034	0.605943	Sustained
Yipf6	15	18	-0.263034	0.661073	Sustained
Rassf4	5	6	-0.263034	0.688025	Sustained
Wac	10	12	-0.263034	0.733137	Sustained
Hipk1	10	12	-0.263034	0.792722	Sustained
Spop	5	6	-0.263034	0.804141	Sustained
Cebpg	10	12	-0.263034	0.843384	Sustained
Wdr82	5	6	-0.263034	0.917212	Sustained
Sdcbp	5	6	-0.263034	0.950774	Sustained
Tiprl	10	12	-0.263034	0.978404	Sustained
Casd1	5	6	-0.263034	1	Sustained
Spcs3	5	6	-0.263034	1	Sustained
Slc16a1	11	13	-0.241008	0.813861	Sustained
Galnt7	6	7	-0.222392	0.517302	Sustained
Acvr1	6	7	-0.222392	0.569284	Sustained
St3gal1	6	7	-0.222392	0.726818	Sustained
Tmem68	6	7	-0.222392	0.747828	Sustained
Zfp706	6	7	-0.222392	0.770688	Sustained
Nedd1	6	7	-0.222392	0.801312	Sustained
Spata13	6	7	-0.222392	0.814632	Sustained
Map3k2	30	35	-0.222392	0.937012	Sustained
Rsbn1l	13	15	-0.206451	0.741733	Sustained
Camk2d	7	8	-0.192645	0.635812	Sustained
Mdfic	7	8	-0.192645	0.638445	Sustained
Ints12	7	8	-0.192645	0.729873	Sustained
Fcho2	14	16	-0.192645	0.764796	Sustained
Ap1ar	7	8	-0.192645	0.783082	Sustained
Chuk	7	8	-0.192645	0.828743	Sustained
Cox15	7	8	-0.192645	0.830699	Sustained
Yod1	21	24	-0.192645	0.94272	Sustained
Ptpre	7	8	-0.192645	1	Sustained
Rasgrp1	7	8	-0.192645	1	Sustained
Tmem33	21	24	-0.192645	1	Sustained
Nbeal1	36	41	-0.187627	0.838445	Sustained
Cd93	8	9	-0.169925	0.5572	Sustained
Srsf6	8	9	-0.169925	0.773584	Sustained
Tmem170b	16	18	-0.169925	0.791554	Sustained
Gopc	8	9	-0.169925	0.871798	Sustained
Map4k3	8	9	-0.169925	0.898343	Sustained
Arl8b	8	9	-0.169925	0.998934	Sustained
Cpne3	18	20	-0.152003	0.523345	Sustained
Ing3	9	10	-0.152003	0.576199	Sustained
Jag1	10	11	-0.137504	0.86658	Sustained
Srsf10	10	11	-0.137504	0.935345	Sustained
Ogfrl1	11	12	-0.125531	0.683086	Sustained
Timm17a	11	12	-0.125531	0.912515	Sustained
Slc35a3	25	27	-0.111031	0.758043	Sustained
1190002N15Rik	13	14	-0.106915	0.544857	Sustained
Lztfl1	13	14	-0.106915	0.649107	Sustained
Braf	26	28	-0.106915	0.813501	Sustained
Pptc7	13	14	-0.106915	0.889441	Sustained
Slc26a2	14	15	-0.0995357	0.836717	Sustained
Rbm27	14	15	-0.0995357	0.878866	Sustained
Vma21	15	16	-0.0931094	0.791342	Sustained
B230219D22Rik	16	17	-0.0874628	0.82214	Sustained
Enpp4	12	12	0	0.508568	Sustained
Ndrg1	2	2	0	0.518585	Sustained
Ccl22	2	2	0	0.530753	Sustained
Tbc1d10a	1	1	0	0.544594	Sustained
Atp11b	6	6	0	0.561004	Sustained
Il13ra1	5	5	0	0.564736	Sustained
Pde7a	11	11	0	0.567674	Sustained
Rabgef1	3	3	0	0.591231	Sustained
Ppp2r5a	2	2	0	0.602331	Sustained
Srpk2	13	13	0	0.615909	Sustained
Pkig	1	1	0	0.619045	Sustained
Ppp3ca	1	1	0	0.62458	Sustained
Fgl2	6	6	0	0.625293	Sustained
Tap1	1	1	0	0.63269	Sustained
Pik3r5	1	1	0	0.633079	Sustained
Atg7	1	1	0	0.633645	Sustained
Abhd16a	1	1	0	0.646511	Sustained
4930453N24Rik	11	11	0	0.650943	Sustained
Pip5k1a	4	4	0	0.659633	Sustained
Tmem243	3	3	0	0.660174	Sustained
Ehd4	3	3	0	0.664305	Sustained
Ptms	1	1	0	0.671107	Sustained
Brox	6	6	0	0.671775	Sustained
Hacd3	4	4	0	0.674731	Sustained
Cdk4	1	1	0	0.676174	Sustained
Slc25a25	3	3	0	0.682785	Sustained
Prkch	2	2	0	0.684019	Sustained
Mdm2	7	7	0	0.689452	Sustained
Ptprc	5	5	0	0.689683	Sustained
Pon2	2	2	0	0.691099	Sustained
Nup160	4	4	0	0.698264	Sustained
Tbc1d23	5	5	0	0.699142	Sustained
Pls3	3	3	0	0.702027	Sustained
Plek	8	8	0	0.707976	Sustained
Arfgef1	3	3	0	0.720406	Sustained
Hnrnpab	2	2	0	0.720533	Sustained
Ttc39b	26	26	0	0.721872	Sustained
Piezo1	1	1	0	0.729109	Sustained
Smg8	1	1	0	0.729355	Sustained
Pla2g12a	3	3	0	0.737013	Sustained
Vcl	5	5	0	0.737659	Sustained
Pcdh7	13	13	0	0.738786	Sustained
N4bp1	3	3	0	0.739603	Sustained
Rnf114	1	1	0	0.750325	Sustained
Cln5	3	3	0	0.771848	Sustained
Dram2	9	9	0	0.777235	Sustained
Fbrs	2	2	0	0.778458	Sustained
Capza2	3	3	0	0.77959	Sustained
Adipor1	2	2	0	0.781345	Sustained
Samd10	1	1	0	0.783806	Sustained
Gnl3l	8	8	0	0.789243	Sustained
Ube2d3	7	7	0	0.790333	Sustained
Map3k12	4	4	0	0.792205	Sustained
Srgn	4	4	0	0.794621	Sustained
Ldlr	3	3	0	0.794725	Sustained
Pak4	1	1	0	0.795856	Sustained
Mospd2	1	1	0	0.797542	Sustained
Cmtm7	1	1	0	0.803596	Sustained
Spint2	1	1	0	0.805081	Sustained
Cotl1	1	1	0	0.818263	Sustained
Dazap2	3	3	0	0.818844	Sustained
Asb1	2	2	0	0.819784	Sustained
Prkar2b	7	7	0	0.827368	Sustained
Pcid2	2	2	0	0.828242	Sustained
Cox18	1	1	0	0.829453	Sustained
Armc10	3	3	0	0.8295	Sustained
Gosr2	4	4	0	0.838464	Sustained
Stip1	1	1	0	0.842142	Sustained
Capn12	1	1	0	0.845151	Sustained
Btf3l4	1	1	0	0.848805	Sustained
Senp5	5	5	0	0.851756	Sustained
Rbpms	1	1	0	0.855409	Sustained
Hccs	5	5	0	0.857259	Sustained
Fam204a	5	5	0	0.857634	Sustained
Lamp2	1	1	0	0.859445	Sustained
Tomm5	1	1	0	0.860564	Sustained
Cog3	2	2	0	0.86323	Sustained
Fgfr1op2	6	6	0	0.871075	Sustained
Anxa5	1	1	0	0.878777	Sustained
Tmem59	2	2	0	0.879802	Sustained
Wdr45b	2	2	0	0.880699	Sustained
Myof	2	2	0	0.881347	Sustained
Mpeg1	4	4	0	0.881882	Sustained
Arf5	1	1	0	0.888439	Sustained
Zfp710	2	2	0	0.890384	Sustained
Slc33a1	1	1	0	0.893879	Sustained
Rad54l2	7	7	0	0.901833	Sustained
Mmp9	5	5	0	0.904691	Sustained
Rpf2	1	1	0	0.90925	Sustained
Men1	2	2	0	0.91213	Sustained
Nus1	13	13	0	0.912839	Sustained
Gtf2h1	2	2	0	0.91312	Sustained
Wdr3	2	2	0	0.916803	Sustained
Ptges3	4	4	0	0.917006	Sustained
Tmem185b	2	2	0	0.922671	Sustained
Cbx1	2	2	0	0.926963	Sustained
Rnf44	6	6	0	0.929698	Sustained
Atxn2l	1	1	0	0.929862	Sustained
Wasf2	5	5	0	0.930775	Sustained
Nr1h2	1	1	0	0.938043	Sustained
Maea	1	1	0	0.938271	Sustained
Golga5	1	1	0	0.947634	Sustained
Wipi1	1	1	0	0.948121	Sustained
Metap2	1	1	0	0.948254	Sustained
Yipf2	1	1	0	0.949107	Sustained
Ppt1	1	1	0	0.949694	Sustained
Ganab	1	1	0	0.955901	Sustained
Eno2	1	1	0	0.958858	Sustained
Mettl14	2	2	0	0.958937	Sustained
Chpt1	11	11	0	0.975733	Sustained
Rarg	2	2	0	0.979775	Sustained
Fam192a	1	1	0	0.986532	Sustained
Gsk3b	1	1	0	0.987231	Sustained
Midn	2	2	0	0.990185	Sustained
Slc39a1	2	2	0	0.994683	Sustained
Smpdl3a	1	1	0	0.995564	Sustained
Mfsd1	2	2	0	0.99842	Sustained
1810030O07Rik	3	3	0	1	Sustained
Ccdc126	5	5	0	1	Sustained
Dhx33	7	7	0	1	Sustained
Hsph1	1	1	0	1	Sustained
Lrrc8d	2	2	0	1	Sustained
Pilra	2	2	0	1	Sustained
Pip4k2b	7	7	0	1	Sustained
Plekha1	6	6	0	1	Sustained
Ppard	1	1	0	1	Sustained
Prkaca	3	3	0	1	Sustained
Sesn2	1	1	0	1	Sustained
Slc35c1	1	1	0	1	Sustained
Sos2	1	1	0	1	Sustained
Wdr89	2	2	0	1	Sustained
Dusp11	15	14	0.0995357	0.694004	Sustained
Tmem64	14	13	0.106915	0.506218	Sustained
Ppp4r2	13	12	0.115477	0.597473	Sustained
Arl5a	13	12	0.115477	0.737364	Sustained
Smim13	13	12	0.115477	0.799567	Sustained
Tmtc3	13	12	0.115477	0.835364	Sustained
Pde10a	13	12	0.115477	1	Sustained
Ero1l	12	11	0.125531	1	Sustained
Gmfb	9	8	0.169925	0.905726	Sustained
Slc25a32	9	8	0.169925	1	Sustained
Tor1aip1	8	7	0.192645	0.566427	Sustained
Fam174a	8	7	0.192645	0.662628	Sustained
P4ha1	8	7	0.192645	0.802835	Sustained
Sms	7	6	0.222392	0.527391	Sustained
Zranb1	7	6	0.222392	0.781189	Sustained
Zfp91	7	6	0.222392	0.986374	Sustained
Ddx3y	13	11	0.241008	0.842821	Sustained
Elovl5	6	5	0.263034	0.659872	Sustained
Hk2	6	5	0.263034	0.716763	Sustained
Adam9	6	5	0.263034	0.856104	Sustained
Rhoq	6	5	0.263034	0.935918	Sustained
Impa1	6	5	0.263034	1	Sustained
Rrm2b	17	14	0.280108	0.87388	Sustained
Asb7	11	9	0.289507	0.997862	Sustained
Yrdc	5	4	0.321928	0.677473	Sustained
Ccni	5	4	0.321928	0.694134	Sustained
Tmem65	10	8	0.321928	0.717894	Sustained
Scoc	5	4	0.321928	0.896071	Sustained
Antxr1	5	4	0.321928	1	Sustained
Erlin1	5	4	0.321928	1	Sustained
Ncoa4	5	4	0.321928	1	Sustained
Cdc14b	9	7	0.36257	0.790705	Sustained
Mpv17l	9	7	0.36257	0.852364	Sustained
Atp11c	13	10	0.378512	0.558611	Sustained
Cbx3	8	6	0.415037	0.539741	Sustained
Synj1	4	3	0.415037	0.562991	Sustained
Socs3	4	3	0.415037	0.596977	Sustained
Jun	4	3	0.415037	0.60229	Sustained
Snrpg	4	3	0.415037	0.602568	Sustained
Rnf145	4	3	0.415037	0.647126	Sustained
Eef1e1	4	3	0.415037	0.675794	Sustained
Csde1	8	6	0.415037	0.866863	Sustained
Ginm1	4	3	0.415037	0.875238	Sustained
Chmp2b	4	3	0.415037	0.878469	Sustained
Ywhag	4	3	0.415037	0.933543	Sustained
Il10rb	4	3	0.415037	0.974529	Sustained
Ier3ip1	4	3	0.415037	0.982259	Sustained
Golph3l	4	3	0.415037	1	Sustained
Ptp4a2	4	3	0.415037	1	Sustained
Tigar	4	3	0.415037	1	Sustained
Cd274	11	8	0.459432	0.585743	Sustained
Itch	7	5	0.485427	0.866022	Sustained
Ppp2r5e	7	5	0.485427	0.903083	Sustained
Mmp13	6	4	0.584963	0.504086	Sustained
Pik3cd	3	2	0.584963	0.61745	Sustained
Ggta1	3	2	0.584963	0.653688	Sustained
Akap7	3	2	0.584963	0.684208	Sustained
Ubl3	3	2	0.584963	0.75391	Sustained
Tmem209	6	4	0.584963	0.772144	Sustained
Ids	12	8	0.584963	0.820343	Sustained
Nab2	3	2	0.584963	0.820785	Sustained
Pabpc1	3	2	0.584963	0.835445	Sustained
Dda1	3	2	0.584963	0.894683	Sustained
Myl12a	3	2	0.584963	0.916714	Sustained
Cep83	3	2	0.584963	0.949787	Sustained
Slc7a2	3	2	0.584963	0.977344	Sustained
Mknk1	3	2	0.584963	0.988111	Sustained
Csnk2a1	9	6	0.584963	0.989493	Sustained
Smurf2	3	2	0.584963	0.997374	Sustained
Acly	3	2	0.584963	1	Sustained
Ece1	3	2	0.584963	1	Sustained
Manf	3	2	0.584963	1	Sustained
Oxsm	3	2	0.584963	1	Sustained
Ppp1r18	3	2	0.584963	1	Sustained
Tnfaip8	3	2	0.584963	1	Sustained
Ap5m1	8	5	0.678072	0.922612	Sustained
Ap3m1	13	8	0.70044	1	Sustained
Ptp4a1	15	9	0.736966	0.628905	Sustained
Ptgr2	5	3	0.736966	0.652822	Sustained
Serpinb2	5	3	0.736966	0.665808	Sustained
Kdm4c	5	3	0.736966	0.815567	Sustained
Slmap	5	3	0.736966	0.945517	Sustained
Flrt2	12	7	0.777608	0.707738	Sustained
Slc16a6	7	4	0.807355	1	Sustained
B4galt3	2	1	1	0.546426	Sustained
Stambpl1	2	1	1	0.562315	Sustained
Pla2g4a	4	2	1	0.582105	Sustained
Usb1	2	1	1	0.602401	Sustained
Mphosph6	2	1	1	0.643738	Sustained
Dock8	2	1	1	0.663522	Sustained
Ibtk	2	1	1	0.679615	Sustained
Klhl8	2	1	1	0.692311	Sustained
Cep192	4	2	1	0.693146	Sustained
Gfpt1	2	1	1	0.772094	Sustained
Cxcl16	2	1	1	0.85554	Sustained
Ell2	6	3	1	0.857707	Sustained
Cox17	6	3	1	0.858182	Sustained
Dennd4b	2	1	1	0.906374	Sustained
Ccl6	4	2	1	0.916333	Sustained
Fam20b	4	2	1	0.917123	Sustained
Alg14	4	2	1	0.917545	Sustained
Tma7	2	1	1	0.938154	Sustained
Itgal	2	1	1	0.959354	Sustained
Pnrc2	6	3	1	0.975223	Sustained
Carnmt1	4	2	1	0.982141	Sustained
Ggps1	4	2	1	0.989081	Sustained
Pgm1	4	2	1	1	Sustained
Tmem164	2	1	1	1	Sustained
Gch1	7	3	1.22239	0.510161	Sustained
Lman1	5	2	1.32193	0.9719	Sustained
Clic4	8	3	1.41504	0.517152	Sustained
Mcl1	8	3	1.41504	0.675657	Sustained
Rala	8	3	1.41504	0.864371	Sustained
Lrrk2	6	2	1.58496	0.549301	Sustained
Eif2ak2	3	1	1.58496	0.561247	Sustained
Il1b	3	1	1.58496	0.597514	Sustained
Stxbp1	3	1	1.58496	0.647718	Sustained
Cep85	3	1	1.58496	0.664364	Sustained
Cat	3	1	1.58496	0.687283	Sustained
Rtn4	3	1	1.58496	0.704931	Sustained
Tifa	3	1	1.58496	0.742127	Sustained
Rsl1d1	3	1	1.58496	0.745606	Sustained
Atf3	3	1	1.58496	0.748524	Sustained
Actn4	3	1	1.58496	0.780381	Sustained
Ptpn1	3	1	1.58496	0.796397	Sustained
Tmx2	3	1	1.58496	0.808377	Sustained
Tprgl	3	1	1.58496	0.861112	Sustained
Sacm1l	6	2	1.58496	0.862726	Sustained
Slc39a6	3	1	1.58496	0.863074	Sustained
Scpep1	3	1	1.58496	0.897877	Sustained
E2f4	3	1	1.58496	0.979048	Sustained
Ms4a6d	3	1	1.58496	1	Sustained
Orai2	3	1	1.58496	1	Sustained
St3gal5	3	1	1.58496	1	Sustained
Zfp790	3	1	1.58496	1	Sustained
Lacc1	4	1	2	0.67598	Sustained
Galnt11	4	1	2	0.735792	Sustained
Git2	4	1	2	0.846822	Sustained
Lig3	8	2	2	1	Sustained
Ralb	4	1	2	1	Sustained
Gabpa	5	1	2.32193	0.689025	Sustained
Golga7	5	1	2.32193	0.951533	Sustained
Cish	1	0	AREd	0.0389298	Downregulated
Gdf15	4	0	AREd	0.075829	Downregulated
Il27	4	0	AREd	0.166714	Downregulated
Tnf	6	0	AREd	0.17806	Downregulated
Il10	6	0	AREd	0.190605	Downregulated
Fam107b	1	0	AREd	0.324415	Downregulated
Rpgrip1	1	0	AREd	0.382843	Downregulated
Gng2	1	0	AREd	0.392031	Downregulated
Arhgef4	1	0	AREd	0.424136	Downregulated
Usp18	2	0	AREd	0.432797	Downregulated
Cerkl	1	0	AREd	0.464906	Downregulated
Creb1	2	0	AREd	0.556784	Sustained
Ddx58	2	0	AREd	0.578214	Sustained
Myd88	1	0	AREd	0.646929	Sustained
Khdrbs1	1	0	AREd	0.649716	Sustained
Plec	1	0	AREd	0.671902	Sustained
Trpt1	1	0	AREd	0.686493	Sustained
Mef2a	1	0	AREd	0.688878	Sustained
Ralgds	1	0	AREd	0.689861	Sustained
Tma16	2	0	AREd	0.701054	Sustained
Ier3	5	0	AREd	0.708167	Sustained
Efr3a	1	0	AREd	0.711444	Sustained
Rusc2	2	0	AREd	0.72358	Sustained
Irf5	2	0	AREd	0.728004	Sustained
Sh3glb1	1	0	AREd	0.753114	Sustained
Lims1	1	0	AREd	0.774565	Sustained
Pum2	2	0	AREd	0.781802	Sustained
Tgm2	1	0	AREd	0.788858	Sustained
Gng12	1	0	AREd	0.802347	Sustained
H2-T24	2	0	AREd	0.818706	Sustained
Snx3	3	0	AREd	0.833151	Sustained
Diaph2	1	0	AREd	0.839605	Sustained
Rabep1	2	0	AREd	0.840918	Sustained
Cd14	1	0	AREd	0.844809	Sustained
Msr1	1	0	AREd	0.84654	Sustained
Edem3	1	0	AREd	0.851821	Sustained
Csnk1g2	1	0	AREd	0.855666	Sustained
Srpr	1	0	AREd	0.879145	Sustained
Pigf	2	0	AREd	0.88447	Sustained
Atp6v0b	1	0	AREd	0.88829	Sustained
Ddx23	1	0	AREd	0.894445	Sustained
Pofut2	1	0	AREd	0.895256	Sustained
Tln1	1	0	AREd	0.901214	Sustained
Ube2l6	2	0	AREd	0.903065	Sustained
Aldh3a2	3	0	AREd	0.914076	Sustained
Stambp	1	0	AREd	0.915087	Sustained
Emc4	1	0	AREd	0.939403	Sustained
Pias4	1	0	AREd	0.94752	Sustained
Atp6v1e1	2	0	AREd	0.959411	Sustained
Nrbp1	1	0	AREd	0.963987	Sustained
Pabpn1	1	0	AREd	0.97404	Sustained
Surf2	1	0	AREd	0.979504	Sustained
Cfl1	1	0	AREd	0.992628	Sustained
Pde6d	1	0	AREd	0.999176	Sustained
Adipor2	4	0	AREd	1	Sustained
Anpep	1	0	AREd	1	Sustained
Arg1	1	0	AREd	1	Sustained
B3gnt9	1	0	AREd	1	Sustained
Dnajb11	1	0	AREd	1	Sustained
Gdap2	1	0	AREd	1	Sustained
Ppif	2	0	AREd	1	Sustained
Sumf2	3	0	AREd	1	Sustained
Znrd1	1	0	AREd	1	Sustained
Id3	0	2	CPEd	0.0668791	Downregulated
Cdc42ep3	0	5	CPEd	0.153954	Downregulated
Bhlhe40	0	5	CPEd	0.190214	Downregulated
Hist1h1c	0	2	CPEd	0.190989	Downregulated
Fam43a	0	4	CPEd	0.228632	Downregulated
Socs1	0	1	CPEd	0.26487	Downregulated
Ptprs	0	5	CPEd	0.284007	Downregulated
Cadm1	0	5	CPEd	0.298997	Downregulated
Jdp2	0	3	CPEd	0.312612	Downregulated
Ifngr1	0	2	CPEd	0.40129	Downregulated
Ahnak	0	5	CPEd	0.429089	Downregulated
Mob3c	0	2	CPEd	0.432901	Downregulated
Siva1	0	2	CPEd	0.442416	Downregulated
Fam234b	0	3	CPEd	0.448097	Downregulated
Igf1	0	2	CPEd	0.450075	Downregulated
Apbb2	0	2	CPEd	0.463959	Downregulated
Tmem39a	0	1	CPEd	0.468003	Downregulated
Orc6	0	6	CPEd	0.469764	Downregulated
Pdss1	0	3	CPEd	0.473315	Downregulated
Dbf4	0	4	CPEd	0.480457	Downregulated
Dnajb5	0	5	CPEd	0.48471	Downregulated
Nlgn2	0	4	CPEd	0.493517	Downregulated
Id1	0	5	CPEd	0.502673	Sustained
Msi2	0	7	CPEd	0.516562	Sustained
Stx6	0	12	CPEd	0.521703	Sustained
Bcl3	0	2	CPEd	0.523408	Sustained
Trim30d	0	1	CPEd	0.531255	Sustained
H1f0	0	2	CPEd	0.538738	Sustained
Aaed1	0	3	CPEd	0.540017	Sustained
Pde4b	0	1	CPEd	0.555479	Sustained
Plxnd1	0	1	CPEd	0.568229	Sustained
Txnip	0	11	CPEd	0.571637	Sustained
Ncoa5	0	5	CPEd	0.574511	Sustained
Rcc1	0	3	CPEd	0.577429	Sustained
Eif1a	0	7	CPEd	0.582892	Sustained
Jarid2	0	2	CPEd	0.58423	Sustained
Gltp	0	5	CPEd	0.586923	Sustained
Mapkapk3	0	3	CPEd	0.591062	Sustained
Cd86	0	5	CPEd	0.600197	Sustained
Dyrk2	0	3	CPEd	0.607341	Sustained
Rad9b	0	1	CPEd	0.6161	Sustained
Gpr85	0	5	CPEd	0.617443	Sustained
Tbl1xr1	0	10	CPEd	0.618366	Sustained
Mitd1	0	1	CPEd	0.622374	Sustained
Aplp2	0	7	CPEd	0.633775	Sustained
Ampd3	0	6	CPEd	0.639102	Sustained
Creb3l1	0	4	CPEd	0.646023	Sustained
Vgll4	0	1	CPEd	0.647956	Sustained
Phc2	0	2	CPEd	0.648624	Sustained
Mark2	0	1	CPEd	0.660345	Sustained
Clcn5	0	1	CPEd	0.665529	Sustained
Carm1	0	3	CPEd	0.674853	Sustained
Atp1a1	0	3	CPEd	0.677227	Sustained
Dcaf8	0	3	CPEd	0.682113	Sustained
Snrpd1	0	3	CPEd	0.683015	Sustained
Srsf4	0	4	CPEd	0.68428	Sustained
Gm2a	0	8	CPEd	0.688703	Sustained
Stat2	0	5	CPEd	0.700678	Sustained
Tgif1	0	3	CPEd	0.703224	Sustained
Wdfy2	0	1	CPEd	0.706114	Sustained
Idh1	0	7	CPEd	0.712959	Sustained
Stat1	0	6	CPEd	0.714105	Sustained
Syf2	0	3	CPEd	0.715459	Sustained
Raver1	0	5	CPEd	0.717503	Sustained
Sumo1	0	5	CPEd	0.717677	Sustained
Mllt6	0	7	CPEd	0.718279	Sustained
Fmnl1	0	1	CPEd	0.720538	Sustained
Anxa2	0	1	CPEd	0.721954	Sustained
Pola2	0	1	CPEd	0.724386	Sustained
Tcea1	0	16	CPEd	0.726102	Sustained
Ints9	0	1	CPEd	0.728435	Sustained
Arl6ip5	0	4	CPEd	0.743401	Sustained
Lgmn	0	4	CPEd	0.74498	Sustained
Map2k3	0	3	CPEd	0.756543	Sustained
Bod1	0	2	CPEd	0.757631	Sustained
Alkbh8	0	1	CPEd	0.757737	Sustained
Ptpn12	0	7	CPEd	0.758326	Sustained
Poldip3	0	3	CPEd	0.762165	Sustained
Smad4	0	1	CPEd	0.766876	Sustained
Ccdc90b	0	5	CPEd	0.768509	Sustained
Evi2a	0	1	CPEd	0.770539	Sustained
Rbm26	0	1	CPEd	0.773893	Sustained
Mfsd4a	0	1	CPEd	0.774999	Sustained
Spi1	0	1	CPEd	0.7853	Sustained
Aprt	0	1	CPEd	0.786217	Sustained
Sdf2l1	0	1	CPEd	0.804308	Sustained
Mink1	0	1	CPEd	0.806795	Sustained
Rec114	0	2	CPEd	0.819278	Sustained
Mfsd10	0	2	CPEd	0.824594	Sustained
Elf2	0	5	CPEd	0.828255	Sustained
Gmeb1	0	2	CPEd	0.829678	Sustained
Kras	0	2	CPEd	0.831125	Sustained
Ssna1	0	1	CPEd	0.831493	Sustained
Cd48	0	3	CPEd	0.832912	Sustained
Clic1	0	1	CPEd	0.835159	Sustained
Snx22	0	1	CPEd	0.836462	Sustained
Plcb3	0	3	CPEd	0.838707	Sustained
Helz	0	2	CPEd	0.839396	Sustained
Fyb	0	1	CPEd	0.842283	Sustained
Chrac1	0	1	CPEd	0.842896	Sustained
Rbbp9	0	3	CPEd	0.843052	Sustained
Ctnnb1	0	8	CPEd	0.844118	Sustained
Wdr36	0	4	CPEd	0.848976	Sustained
Tapbp	0	2	CPEd	0.850844	Sustained
Cebpb	0	7	CPEd	0.850874	Sustained
Polr2h	0	1	CPEd	0.851014	Sustained
Cul5	0	5	CPEd	0.855596	Sustained
Supt16	0	4	CPEd	0.855736	Sustained
Ncoa6	0	4	CPEd	0.857779	Sustained
Clec12a	0	2	CPEd	0.862693	Sustained
Il1rn	0	7	CPEd	0.864027	Sustained
Nol11	0	2	CPEd	0.864742	Sustained
Syngr2	0	1	CPEd	0.865618	Sustained
Vasp	0	4	CPEd	0.868382	Sustained
Lars2	0	1	CPEd	0.869872	Sustained
Ticam1	0	1	CPEd	0.87073	Sustained
Abcg1	0	3	CPEd	0.871546	Sustained
Snrnp40	0	4	CPEd	0.875272	Sustained
Il2rg	0	1	CPEd	0.876142	Sustained
Ctbp2	0	1	CPEd	0.87748	Sustained
Sart3	0	2	CPEd	0.878404	Sustained
Fcgr4	0	3	CPEd	0.880949	Sustained
Naa40	0	10	CPEd	0.882877	Sustained
Cd53	0	3	CPEd	0.883512	Sustained
Herc4	0	3	CPEd	0.885316	Sustained
Dusp7	0	1	CPEd	0.887693	Sustained
Ehd1	0	3	CPEd	0.889715	Sustained
Galnt2	0	1	CPEd	0.895927	Sustained
Arnt	0	1	CPEd	0.897147	Sustained
Mta1	0	6	CPEd	0.901234	Sustained
Ncbp1	0	1	CPEd	0.902109	Sustained
Pld2	0	1	CPEd	0.904629	Sustained
Smarcd2	0	2	CPEd	0.906	Sustained
Srcap	0	1	CPEd	0.908717	Sustained
Ddit4	0	4	CPEd	0.908756	Sustained
Ttf1	0	2	CPEd	0.910107	Sustained
Nacc1	0	1	CPEd	0.910194	Sustained
Amz2	0	4	CPEd	0.916236	Sustained
H2-K1	0	1	CPEd	0.916353	Sustained
Tmbim6	0	1	CPEd	0.923596	Sustained
Szrd1	0	7	CPEd	0.923879	Sustained
Lcp1	0	3	CPEd	0.924713	Sustained
Fpgs	0	3	CPEd	0.925744	Sustained
Mif4gd	0	3	CPEd	0.927104	Sustained
Tmem165	0	4	CPEd	0.928451	Sustained
Slc31a2	0	1	CPEd	0.934951	Sustained
Kctd20	0	2	CPEd	0.93609	Sustained
Cap1	0	1	CPEd	0.939141	Sustained
Ppp4c	0	2	CPEd	0.940917	Sustained
Polr2d	0	3	CPEd	0.941919	Sustained
M6pr	0	4	CPEd	0.946492	Sustained
Serf2	0	1	CPEd	0.951631	Sustained
Cd72	0	2	CPEd	0.952671	Sustained
Gid4	0	1	CPEd	0.953169	Sustained
Mrpl10	0	3	CPEd	0.953292	Sustained
Bax	0	1	CPEd	0.962506	Sustained
Ifnar2	0	5	CPEd	0.966007	Sustained
Brd4	0	9	CPEd	0.969762	Sustained
Exosc3	0	3	CPEd	0.970461	Sustained
Emd	0	1	CPEd	0.97141	Sustained
Gnb2	0	3	CPEd	0.97147	Sustained
Mta2	0	3	CPEd	0.972623	Sustained
Wdr1	0	2	CPEd	0.973199	Sustained
Tmem80	0	1	CPEd	0.97628	Sustained
Otub1	0	2	CPEd	0.984998	Sustained
Ctu2	0	1	CPEd	0.985107	Sustained
Npc1	0	3	CPEd	0.986184	Sustained
Smarcc2	0	3	CPEd	0.993037	Sustained
Dnajb1	0	3	CPEd	0.994143	Sustained
Ssh3	0	2	CPEd	0.994799	Sustained
Aco1	0	3	CPEd	1	Sustained
Aldh18a1	0	3	CPEd	1	Sustained
Aph1a	0	2	CPEd	1	Sustained
Arpc2	0	1	CPEd	1	Sustained
Arpc4	0	2	CPEd	1	Sustained
Atf4	0	1	CPEd	1	Sustained
Atp7a	0	2	CPEd	1	Sustained
Cdk2ap2	0	2	CPEd	1	Sustained
Cmtm3	0	4	CPEd	1	Sustained
Cpne2	0	2	CPEd	1	Sustained
Csf2rb2	0	3	CPEd	1	Sustained
Efhd2	0	3	CPEd	1	Sustained
Fabp3	0	1	CPEd	1	Sustained
Fbxo22	0	6	CPEd	1	Sustained
Fermt3	0	2	CPEd	1	Sustained
Gng5	0	2	CPEd	1	Sustained
Hsd17b7	0	1	CPEd	1	Sustained
Hyal2	0	1	CPEd	1	Sustained
Ipmk	0	2	CPEd	1	Sustained
Kif2a	0	2	CPEd	1	Sustained
Met	0	2	CPEd	1	Sustained
Mllt1	0	3	CPEd	1	Sustained
Ms4a6b	0	9	CPEd	1	Sustained
Ostc	0	1	CPEd	1	Sustained
Pdpn	0	1	CPEd	1	Sustained
Pfn1	0	2	CPEd	1	Sustained
Phb2	0	1	CPEd	1	Sustained
Pi4kb	0	3	CPEd	1	Sustained
Ppp1r9b	0	2	CPEd	1	Sustained
Psmd11	0	8	CPEd	1	Sustained
Psmd7	0	3	CPEd	1	Sustained
Ptges	0	5	CPEd	1	Sustained
Pygo2	0	7	CPEd	1	Sustained
Rbm10	0	1	CPEd	1	Sustained
Shc1	0	1	CPEd	1	Sustained
Slc13a3	0	1	CPEd	1	Sustained
Slc22a5	0	4	CPEd	1	Sustained
Slc25a38	0	1	CPEd	1	Sustained
Spcs2	0	5	CPEd	1	Sustained
Srd5a3	0	2	CPEd	1	Sustained
Srsf2	0	1	CPEd	1	Sustained
Srsf9	0	7	CPEd	1	Sustained
Ubac2	0	3	CPEd	1	Sustained
Usp39	0	3	CPEd	1	Sustained
Ykt6	0	4	CPEd	1	Sustained
Zfp451	0	3	CPEd	1	Sustained
Zmynd8	0	1	CPEd	1	Sustained
Vegfa	0	0	No AREs or CPEs	0.307566	Downregulated
Kalrn	0	0	No AREs or CPEs	0.441544	Downregulated
Etnk1	0	0	No AREs or CPEs	0.459517	Downregulated
Nfkb1	0	0	No AREs or CPEs	0.496739	Downregulated
Cers6	0	0	No AREs or CPEs	0.522292	Sustained
Pqlc1	0	0	No AREs or CPEs	0.533521	Sustained
Comt	0	0	No AREs or CPEs	0.533673	Sustained
Adap2	0	0	No AREs or CPEs	0.538403	Sustained
Dip2c	0	0	No AREs or CPEs	0.538994	Sustained
S100a10	0	0	No AREs or CPEs	0.575842	Sustained
Clec5a	0	0	No AREs or CPEs	0.586696	Sustained
Slamf7	0	0	No AREs or CPEs	0.587126	Sustained
Hlx	0	0	No AREs or CPEs	0.590509	Sustained
Ssh2	0	0	No AREs or CPEs	0.596682	Sustained
Rsl24d1	0	0	No AREs or CPEs	0.60488	Sustained
1110038F14Rik	0	0	No AREs or CPEs	0.605435	Sustained
Slc44a1	0	0	No AREs or CPEs	0.614745	Sustained
Hilpda	0	0	No AREs or CPEs	0.670327	Sustained
Sh3gl1	0	0	No AREs or CPEs	0.674201	Sustained
Itgax	0	0	No AREs or CPEs	0.680737	Sustained
Npm3	0	0	No AREs or CPEs	0.684949	Sustained
Nufip2	0	0	No AREs or CPEs	0.698241	Sustained
Mpv17	0	0	No AREs or CPEs	0.726942	Sustained
Ly96	0	0	No AREs or CPEs	0.728248	Sustained
Rps27rt	0	0	No AREs or CPEs	0.730452	Sustained
Lsm8	0	0	No AREs or CPEs	0.737165	Sustained
Cux1	0	0	No AREs or CPEs	0.741446	Sustained
Hmgcl	0	0	No AREs or CPEs	0.751606	Sustained
Ppat	0	0	No AREs or CPEs	0.75238	Sustained
Erh	0	0	No AREs or CPEs	0.760168	Sustained
Cd82	0	0	No AREs or CPEs	0.763288	Sustained
Gatad2b	0	0	No AREs or CPEs	0.763483	Sustained
Lsm3	0	0	No AREs or CPEs	0.766086	Sustained
Irak1	0	0	No AREs or CPEs	0.767412	Sustained
Mrgbp	0	0	No AREs or CPEs	0.769202	Sustained
Naga	0	0	No AREs or CPEs	0.774579	Sustained
Prorsd1	0	0	No AREs or CPEs	0.77579	Sustained
Tm9sf1	0	0	No AREs or CPEs	0.777681	Sustained
Elk4	0	0	No AREs or CPEs	0.785536	Sustained
Sfmbt1	0	0	No AREs or CPEs	0.791763	Sustained
Isg20	0	0	No AREs or CPEs	0.800903	Sustained
Ankrd13c	0	0	No AREs or CPEs	0.804041	Sustained
Fhl3	0	0	No AREs or CPEs	0.807713	Sustained
Tmem216	0	0	No AREs or CPEs	0.807903	Sustained
Srrm2	0	0	No AREs or CPEs	0.81429	Sustained
Tirap	0	0	No AREs or CPEs	0.817012	Sustained
Ube2i	0	0	No AREs or CPEs	0.838762	Sustained
Nob1	0	0	No AREs or CPEs	0.839214	Sustained
Ctdspl2	0	0	No AREs or CPEs	0.8499	Sustained
Csnk1a1	0	0	No AREs or CPEs	0.851001	Sustained
Prrc2a	0	0	No AREs or CPEs	0.853493	Sustained
Bzw1	0	0	No AREs or CPEs	0.854667	Sustained
Rp2	0	0	No AREs or CPEs	0.857087	Sustained
Batf	0	0	No AREs or CPEs	0.870094	Sustained
Nrg4	0	0	No AREs or CPEs	0.87635	Sustained
Gpbp1l1	0	0	No AREs or CPEs	0.876596	Sustained
Scaf4	0	0	No AREs or CPEs	0.911966	Sustained
Tbc1d14	0	0	No AREs or CPEs	0.922994	Sustained
Larp4b	0	0	No AREs or CPEs	0.924024	Sustained
Pym1	0	0	No AREs or CPEs	0.93083	Sustained
Spns1	0	0	No AREs or CPEs	0.931172	Sustained
Lmbr1l	0	0	No AREs or CPEs	0.936652	Sustained
Tpd52l2	0	0	No AREs or CPEs	0.941475	Sustained
Phc3	0	0	No AREs or CPEs	0.94596	Sustained
Esyt1	0	0	No AREs or CPEs	0.961362	Sustained
Ints5	0	0	No AREs or CPEs	0.96245	Sustained
Parp6	0	0	No AREs or CPEs	0.989831	Sustained
Ak2	0	0	No AREs or CPEs	1	Sustained
Ap1m1	0	0	No AREs or CPEs	1	Sustained
Eif4ebp2	0	0	No AREs or CPEs	1	Sustained
Fth1	0	0	No AREs or CPEs	1	Sustained
Hyou1	0	0	No AREs or CPEs	1	Sustained
Litaf	0	0	No AREs or CPEs	1	Sustained
Map2k7	0	0	No AREs or CPEs	1	Sustained
Mfap3l	0	0	No AREs or CPEs	1	Sustained
Nfe2l1	0	0	No AREs or CPEs	1	Sustained
Plxna1	0	0	No AREs or CPEs	1	Sustained
Ppp1cc	0	0	No AREs or CPEs	1	Sustained
Rcor3	0	0	No AREs or CPEs	1	Sustained
Ruvbl2	0	0	No AREs or CPEs	1	Sustained
Samd8	0	0	No AREs or CPEs	1	Sustained
Sec11a	0	0	No AREs or CPEs	1	Sustained
Smim10l1	0	0	No AREs or CPEs	1	Sustained
Snrpa	0	0	No AREs or CPEs	1	Sustained
Ssr2	0	0	No AREs or CPEs	1	Sustained
Taf12	0	0	No AREs or CPEs	1	Sustained
Taf6l	0	0	No AREs or CPEs	1	Sustained
Tomm40	0	0	No AREs or CPEs	1	Sustained
Trem3	0	0	No AREs or CPEs	1	Sustained
Txndc5	0	0	No AREs or CPEs	1	Sustained
Ubtf	0	0	No AREs or CPEs	1	Sustained
