# Supplementary material for: Macrophage inflammation resolution requires CPEB4-directed offsetting of mRNA degradation
Source: eLife. 2022 Apr 20;11:e75873. doi: 10.7554/eLife.75873 (PMC9094754; doi:10.7554/eLife.75873)
Supplement: Supplementary file 7. [file elife-75873-supp7.xlsx]

## Sheet: Sheet1
RT-qPCR primers	Forward	Reverse
dtVNN		ccccccccccccccccccVNN
Firefly 1	gggacgaagacgaacacttc	ggaaagacgatgacggaaaa
Firefly 2	ctcgcatgccagagatccta	ctgaggggatcgtaaaaacagc
hCpeb4	aggtgtttgtaggcggattg	aacagcaggaatgcatagcc
hElavl1 (HuR)	ccgtcaccaatgtgaaagtg	tcgcggcttcttcatagttt
hGapdh	cgctctctgctcctcctgtt	ccatggtgtctgagcgatgt
m18S	cgcttccttacctggttgat	gagcgaccaaaggaaccata
mArg1	acaagacagggctcctttcag	ggcttatggttaccctcccg
mCcl2	agctgtagtttttgtcaccaagc	gtgctgaagaccttagggca
mCpeb1	cgctgcaaagaggtacaggt	caaggcaccaacaaacacc
mCpeb2	tggagcaaccatcagaacag	cgagtgaatttcggtggtg
mCpeb3	cgtttgtacggtggtgtttg	ccgtttgtcaatgtcgttgt
mCpeb4	ccagaatggggagagagtgg	cggaaactagctgtgatctcatct
mCxcl1	acccaaaccgaagtcatagcc	ttgtcagaagccagcgttc
mCxcl2	tttgccttgaccctgaagcc	ctttggttcttccgttgaggga
mDusp1	gcgctccactcaagtcttct	ctgtttgctgcacagctcag
mGapdh	cttcaccaccatggaggaggc	ggcatggactgtggtcatgag
mHif1a	tttggcagcgatgacacag	aagtggctttggagtttccg
mIl10	ggttgccaagccttatcgga	gagaaatcgatgacagcgcc
mIl1a	gagagccgggtgacagtatc	tgacaaacttctgcctgacg
mIl1rn	tccgcttctgacagtggaac	tcccagattctgaaggcttgc
mIl6	gccttcttgggactgatgct	tgccattgcacaactcttttct
mPtgs2	tgagtaccgcaaacgcttct	cagccatttccttctctcctgt
mRplp0	ccgcaggggcagcagtggt	aagcgcgtcctggattgtct
mSocs1	cgctccttggggtctgtt	gagatcgcattgtcggct
mSocs3	ttcgggactagctccccgggat	ttttggagctgaaggtcttga
mTbp	agaacaatccagactagcagca	gggaacttcacatcacagctc
mTnf	ctatggcccagaccctcacactc	gctggcaccactagttggttgtctt
mTxnip	ggacgatgtggacgactctc	ggggcatgaactggaactca
Renilla	accagatttgcctgatttgc	gataactggtccgcagtggt
