# Supplementary material for: Macrophage inflammation resolution requires CPEB4-directed offsetting of mRNA degradation
Source: eLife. 2022 Apr 20;11:e75873. doi: 10.7554/eLife.75873 (PMC9094754; doi:10.7554/eLife.75873)
Supplement: Supplementary file 8. [file elife-75873-supp8.xlsx]

## Sheet: Sheet1
Constructs	Sequence
CPEs wt (Cyclin b1)	TGTTGGCACCATGTGCTTCTGTAAATAGTGTATTGTGTTTTTAATGTTTTACTGGTTTTAATAAAGC
CPEs mut (Cyclin b1)	TGTTGGCACCATGTGCTTCTGTAAATAGTGTATTGTGTTTgggATGTTggACTGGTTggAATAAAGC
5 AREs (Ier3)	TTCTAGATCATTTATGTATTTATGTATATCCTCCTAGGTGAAGGAGGGGTGTATGTAATATTTATTCTAACTTATGCAGGGGTGCGAGATATGCCTCCCTGCTGTAACACAGATATTTATTACGATTTATGT
2 AREs (Ier3)	TTCTAGATCATTTATGTATTTATGTATATCCTCCTAGGTGAAGGAGGGGTGTATGTAATATcTATTCTAACTTATGCAGGGGTGCGAGATATGCCTCCCTGCTGTAACACAGATATcTATTACGATcTATGT
0 AREs (Ier3))	TTCTAGATCATcTATGTATcTATGTATATCCTCCTAGGTGAAGGAGGGGTGTATGTAATATcTATTCTAACTTATGCAGGGGTGCGAGATATGCCTCCCTGCTGTAACACAGATATcTATTACGATcTATGT
link between CPE and ARE constructs	AGATCTGTTGGAGATCT
